# Supplementary material for: Changes in the Bacterial Microbiota in Gut, Blood, and Lungs following Acute LPS Instillation into Mice Lungs
Source: PLoS One. 2014 Oct 21;9(10):e111228. doi: 10.1371/journal.pone.0111228 (PMC4205020; doi:10.1371/journal.pone.0111228)
Supplement: Table S2 — Time course sequence alignment list. (XLSX) [file pone.0111228.s003.xlsx]

## Sheet: Table S2
>H97X84I02IZ5FW
A-A-C-G-A--A-C-G-C--T-G-G-C-G-G--C-A-T-G--C---C-T--AA-C--AC-A-T-G--C-A-A-G--T-C--GA-A-CG-A---------G-A--------------------------------------------------C-C------------------------TTC-G------------------------------G--G------------------------------------------TC--T-------AG-T-G-G-C-GC-A--C--G-GG-T-G-C-G-T-A--AC-G-C-G-T-G-GG---A-A-T-CT-G-C-C-CTT--GG-G-T-T-C--G-G-A---AT-AA-C--TC--G-C-C-G-A-A-A-----…
>H97X84I02GCV1S
A-T-T-G-A--A-C-G-C--T-G-G-C-G-G--C-A-T-G--C---C-T--TA-C--AC-A-T-G--C-A-A-G--T-C--GA-A-CG-----------G-TAA--C-A--G----------------------------------------G--------------------------TT--A---------------------------------A------------------------------G-C-T----G--AC--G-------AG-T-G-G-C-GA-A--C--G-GG-T-G-A-G-T-A--AT-A-T-A-T-C-GG---A-A-C-GT-G-C-C-CAG--TC-G-T-G-G--G-G-G---AT-AA-C--TG--C-T-C-G-A-A-A-----…
>H97X84I02F2OUS
G-A-T-G-A--A-C-G-C--T-A-G-C-G-G--C-A-G-G--C---T-T--AA-T--AC-A-T-G--C-A-A-G--T-C--GA-G-GG-----------G-CAT--C-A--G-------------------------------C--T-T-A-T-A------------------------GCA-A------------------------------T--A--T-A-G----G------------------G-C-T----G--GC--G-------AC-C-G-G-C-AA-A--C--G-GG-T-G-C-G-G-A--AC-A-C-G-T-A-CA---CAA-C-CT-T-C-C-TTT--AA-G-A-G-G--G-G-G---AT-AG-C--CC--A-T-A-G-A-A-A-----…
>H97X84I02HL7IN
G-A-T-G-A--A-C-G-C--T-A-G-C-G-G--G-A-G-G--C---C-T--AA-C--AC-A-T-G--C-A-A-G--C-C--GA-G-CG-G---------T-A----T-T--G------------------------------------T-T-T-C------------------------TTC-G------------------------------G--A--A-A---------------------------T-G----A--GA--G-------AG-C-G-G-C-GT-A--C--G-GG-T-G-C-G-G-A--AC-A-C-G-T-G-TG---CAA-C-CT-G-C-C-TTT--AT-C-T-G-G--G-G-G---AT-AG-C--CT--T-T-C-G-A-A-A-----…
>H97X84I02GGBAS
A-A-C-G-A--A-C-G-C--T-G-G-C-G-G--C-A-G-G--C---T-T--AA-C--AC-A-T-G--C-A-A-G--T-C--GA-G-CG-C---------C-C----------------------------------------------------C------------------------GCA-A------------------------------G---------------------------------------------GG--G-------AG-C-G-G-C-AG-A--C--G-GG-T-G-A-G-T-A--AC-G-C-G-T-G-GG---A-A-T-CT-A-C-C-CAT--CA-C-T-A-C--G-G-A---AC-AA-C--TC--C-G-G-G-A-A-A-----…
>H97X84I02HAC4D
A-A-C-G-A--A-C-G-C--T-G-G-C-G-G--C-A-G-G--C---T-T--AA-C--AC-A-T-G--C-A-A-G--T-C--G--A--G-C---------G-C--------------------------------------------------C-C------------------------CGC-A------------------------------A--G------------------------------------------GG--G-------AG-C-G-G-C-AG-A--C--G-GG-T-G-A-G-T-A--AC-G-C-G-T-G-GG---A-A-T-CT-G-C-C-CTT--GG-G-T-T-C--G-G-A---AT-AA-C--TC--G-C-C-G-A-A-A-----…
>H97X84I02IV6BJ
G-A-C-G-A--A-C-G-C--T-G-G-C-G-G--C-G-T-G--C---T-T--AA-C--AC-A-T-G--C-A-A-G--T-C--GA-A-CG-----------G-AA---A-G--G--------------------------------C-C-C-T-G-C------------------------TTT-T------------------------------G--T--G-G-G-G-----------------------T-G----C--TC--G-------AG-T-G-G-C-GA-A--C--G-GG-T-G-A-G-T-A--AC-A-C-G-T-G-AG---TAA-C-CT-G-C-C-CTT--GA-C-T-T-T--G-G-G---AT-AA-C--TT--C-A-G-G-A-A-A-----…
>H97X84I02F8FYE
A-T-T-G-A--A-C-G-C--T-G-G-C-G-G--C-A-T-G--C---C-T--TA-C--AC-A-T-G--C-A-A-G--T-C--GA-A-CG-----------G-TAA--C-A--G--------------------------------------G-T-C------------------------TTC-G------------------------------G--A--T---------------------------G-C-T----G--AC--G-------AG-T-G-G-C-GA-A--C--G-GG-T-G-A-G-T-A--AT-A-C-A-T-C-GG---A-A-C-GT-G-C-C-CGA--TC-G-T-G-G--G-G-G---AT-AA-C--GA--G-G-C-G-A-A-A-----…
>H97X84I02GCUHQ
A-T-T-G-A--A-C-G-C--T-G-G-C-G-G--C-A-T-G--C---C-T--TA-C--AC-A-T-G--C-A-A-G--T-C--GA-A-CG-A---------G-A--------------------------------------------------C-C------------------------TTC-G------------------------------G--G------------------------------------------TC--T-------AG-T-G-G-C-GC-A--C--G-GG-T-G-C-G-T-A--AC-G-C-G-T-G-GG---A-A-T-CT-G-C-C-CTT--GG-G-T-T-C--G-G-A---AT-AA-C--TC--G-C-C-G-A-A-A-----…
>H97X84I02FVKDF
A-A-C-G-A--A-C-G-C--T-G-G-C-G-G--C-A-T-G--C---C-T--AA-C--AC-A-T-G--C-A-A-G--T-C--GA-A-CG-----------G-TAA--C-A--G----------------------------------------G--------------------------TT--A---------------------------------A------------------------------G-C-T----G--AC--G-------AG-T-G-G-C-GA-A--C--G-GG-T-G-A-G-T-A--AT-A-T-A-T-C-GG---A-A-C-GT-G-C-C-CAG--TC-G-T-G-G--G-G-G---AT-AA-C--TG--C-T-C-G-A-A-A-----…
>H97X84I02GYELM
A-T-T-G-A--A-C-G-C--T-G-G-C-G-G--C-A-T-G--C---C-T--TA-C--AC-A-T-G--C-A-A-G--T-C--GA-A-CG-----------G-CAG--C-G--C------------------------------------G-G-G-A------------------------GCA-A------------------------------T--C--C-T-------------------------G-G-C----G--GC--G-------AG-T-G-G-C-GA-A--C--G-GG-T-G-A-G-T-A--AT-A-T-A-T-C-GG---A-A-C-GT-G-C-C-CAT--TA-G-T-G-G--G-G-G---AT-AG-C--CC--G-G-C-G-A-A-A-----…
>H97X84I02IXLXC
A-G-C-G-A--A-C-G-C--T-G-G-C-G-G--C-A-G-G--C---T-T--AA-C--AC-A-T-G--C-A-A-G--T-C--GA-A-CG-----------G-T--------------------------------------------------C-C------------------------TTC-G------------------------------G---------------------------------------------GA--T-------AG-T-G-G-C-GG-A--C--G-GG-T-G-A-G-T-A--AC-A-C-G-T-G-GG---A-A-C-GT-A-C-C-CTT--AG-G-T-T-C--G-G-A---AC-AA-C--AC--A-G-G-G-A-A-A-----…
>H97X84I02JQCOL
A-T-T-G-A--A-C-G-C--T-G-G-C-G-G--C-A-T-G--C---C-T--TA-C--AC-A-T-G--C-A-A-G--T-C--GA-A-CG-----------G-TAA--C-A--G--------------------------------------G-T-C------------------------TTC-G------------------------------G--A--T---------------------------G-C-T----G--AC--G-------AG-T-G-G-C-GA-A--C--G-GG-T-G-A-G-T-A--AT-A-C-A-T-C-GG---A-A-C-GT-G-C-C-CGA--TC-G-T-G-G--G-G-G---AT-AA-C--GA--A-G-C-G-A-A-A-----…
>H97X84I02IWAX0
G-A-T-G-A--A-C-G-C--T-G-G-C-G-G--C-G-T-G--C---C-T--AA-T--AC-A-T-G--C-A-A-G--T-C--GA-G-CG-C---------G-A----G-A--T-------------------------------TG-A-G-G-A-G------------------------CTT-G------------------------------C--T--C-C-T-C--A--------------------T-G----A--TC--G-------AG-C-G-G-C-GG-A--C--G-GG-T-G-A-G-T-A--AC-A-C-G-T-A-GG---CAA-C-CT-A-C-C-CTT--GA-G-A-T-T--G-G-G---AT-AA-C--TA--C-C-G-G-A-A-A-----…
>H97X84I02IJOYC
A-T-T-G-A--A-C-G-C--T-G-G-C-G-G--C-A-T-G--C---C-T--TA-C--AC-A-T-G--C-A-A-G--T-C--GA-A-CG-----------G-TAA--C-A--G----------------------------------------GTC------------------------TTCGGA--------------------------------T------------------------------G-C-T----G--AC--G-------AG-T-G-G-C-GA-A--C--G-GG-T-G-A-G-T-A--AT-A-T-A-T-C-GG---A-A-C-GT-G-C-C-CAG--TC-G-T-G-G--G-G-G---AT-AA-C--TG--C-T-C-G-A-A-A-----…
>H97X84I02H0RWE
A-T-T-G-A--A-C-G-C--T-G-G-C-G-G--C-A-T-G--C---T-T--TA-C--AC-A-T-G--C-A-A-G--T-C--GA-G-CG-----------G-CAG--C-G--C------------------------------------G-G-G-G------------------------GCA-A------------------------------C--C--C-T-------------------------G-G-C----G--GC--G-------AG-C-G-G-C-GA-A--C--G-GG-T-G-A-G-T-A--AT-G-C-A-T-C-GG---A-A-C-GT-A-T-C-CTG--TA-G-T-G-G--G-G-G---AT-AA-C--CC--A-G-C-G-A-A-A-----…
>H97X84I02GCX28
G-A-C-G-A--A-C-G-C--T-G-G-C-G-G--C-G-T-G--C---C-T--AA-T--AC-A-T-G--C-A-A-G--T-A--GA-A-CG-C---------T-G----A-A--G-------------------------------AG-A-G-G-A-G------------------------CTT-G------------------------------C--T--C-T-T-C--T--------------------T-G----G--AT--G-------AG-T-T-G-C-GA-A--C--G-GG-T-G-A-G-T-A--AC-G-C-G-T-A-GG---TAA-C-CT-G-C-C-TTG--TA-G-C-G-G--G-G-G---AT-AA-C--TA--T-T-G-G-A-A-A-----…
>H97X84I02IV0NX
G-A-T-G-A--A-C-G-C--T-G-G-C-G-G--C-G-T-G--C---C-T--AA-T--AC-A-T-G--C-A-A-G--T-C--GA-G-CG-C---------G-A----G-A--T-------------------------------TG-A-G-G-A-G------------------------CTT-G------------------------------C--T--C-C-T-T--A--------------------A-T----C--TC--G-------AG-C-G-G-C-GG-A--C--G-GG-T-G-A-G-T-A--AC-A-C-G-T-A-GG---CAA-C-CT-A-C-C-CTT--GA-G-A-T-T--G-G-G---AT-AA-C--TA--C-C-G-G-A-A-A-----…
>H97X84I02ITTKX
G-A-T-G-A--A-C-G-C--T-G-G-C-G-G--C-G-T-G--C---C-T--AA-T--AC-A-T-G--C-A-A-G--T-C--GA-A-CG-A---------G-A--------------------------------------------------C-C------------------------TTC-G------------------------------G--G------------------------------------------TC--T-------AG-T-G-G-C-GC-A--C--G-GG-T-G-C-G-T-A--AC-G-C-G-T-G-GG---A-A-T-CT-G-C-C-CTT--GG-G-T-T-C--G-G-A---AT-AA-C--TC--G-C-C-G-A-A-A-----…
>H97X84I02GW2HS
G-A-T-G-A--A-C-G-C--T-A-G-C-G-G--G-A-G-G--C---C-T--AA-C--AC-A-T-G--C-A-A-G--C-C--GA-G-CG-G---------T-A----T-T--G------------------------------------T-T-T-C------------------------TTC-G------------------------------G--A--A-A---------------------------T-G----A--GA--G-------AG-C-G-G-C-GT-A--C--G-GG-T-G-C-G-G-A--AC-A-C-G-T-G-TG---CAA-C-CT-G-C-C-TTT--AT-C-T-G-G--G-G-G---AT-AG-C--CT--T-T-C-G-A-A-A-----…
>H97X84I02HL330
A-T-T-G-A--A-C-G-C--T-G-G-C-G-G--C-A-T-G--C---C-T--TA-C--AC-A-T-G--C-A-A-G--T-C--GA-A-CG-----------G-TA-----A--C------------------------------------A-G-G--------------------------TTA-A----------------------------------------------------------------G-C-T----G--AC--G-------AG-T-G-G-C-GA-A--C--G-GG-T-G-A-G-T-A--AT-A-T-A-T-C-GG---A-A-C-GT-G-C-C-CAT--TA-G-T-G-G--G-G-G---AT-AG-C--CC--G-G-C-G-A-A-A-----…
>H97X84I02FT46N
A-A-T-G-A--A-C-G-C--T-G-G-C-G-G--C-A-T-G--C---C-T--AA-C--AC-A-T-G--C-A-A-G--T-C--GA-A-CG-A---------A-G--------------------------------------------------G-C------------------------TTC-G------------------------------G--C------------------------------------------CT--T-------AG-T-G-G-C-GC-A--C--G-GG-T-G-C-G-T-A--AC-G-C-G-T-G-GG---A-A-T-CT-G-C-C-CTC--AG-G-T-T-C--G-G-A---AT-AA-C--AG--C-G-A-G-A-A-A-----…
>H97X84I02FEI1H
G-A-C-G-A--A-C-G-C--T-G-G-C-G-G--C-G-T-G--C---C-T--AA-T--AC-A-T-G--C-A-A-G--T-C--GA-G-CG-A---------A-C----C-A--A-------------------------------TA-A-G-A-A-G------------------------CTT-G------------------------------C--T--T-T-T-T--G--------------------T-T----G--GT--T-------AG-C-G-G-C-GG-A--C--G-GG-T-G-A-G-T-A--AC-A-C-G-T-G-GG---TAA-C-CT-G-C-C-TGT--AA-G-A-C-C--G-G-G---AT-AA-C--TC--C-G-G-G-A-A-A-----…
>H97X84I02F7NOW
G-A-T-G-A--A-C-G-C--T-A-G-C-G-G--G-A-G-G--C---C-T--AA-C--AC-A-T-G--C-A-A-G--T-C--GA-A-CG-A---------G-A--------------------------------------------------C-C------------------------TTC-G------------------------------G--G------------------------------------------TC--T-------AG-T-G-G-C-GC-A--C--G-GG-T-G-C-G-T-A--AC-G-C-G-T-G-GG---A-A-T-CT-G-C-C-CTT--GG-G-T-T-C--G-G-A---AT-AA-C--TC--G-C-C-G-A-A-A-----…
>H97X84I02JJRTI
A-G-C-G-A--A-C-G-C--T-G-G-C-G-G--C-A-G-G--C---T-T--AA-C--AC-A-T-G--C-A-A-G--T-C--GA-A-CG-A---------G-A--------------------------------------------------C-C------------------------TTC-G------------------------------G--G------------------------------------------TC--T-------AG-T-G-G-C-GC-A--C--G-GG-T-G-C-G-T-A--AC-G-C-G-T-G-GG---A-A-T-CT-G-C-C-CTT--GG-G-T-T-C--G-G-A---AT-AA-C--TC--G-C-C-G-A-A-A-----…
>H97X84I02H70HI
G-A-T-G-A--A-C-G-C--T-G-G-C-G-G--C-A-T-G--C---C-T--TA-C--AC-A-T-G--C-A-A-G--T-C--GG-A-CG-G---------G-A------------------------------------------------A-G-T------------------------GGT--------------------------------G--T--T---------------------------------------TC--C-------AG-T-G-G-C-GG-A--C--G-GG-T-G-A-G-T-A--AC-G-C-G-T-A-AG---A-A-C-CT-A-C-C-CTT--GG-G-A-G-G--G-G-A---AC-AA-C--AG--C-T-G-G-A-A-A-----…
>H97X84I02FUYSY
A-A-C-G-A--A-C-G-C--T-G-G-C-G-G--C-A-T-G--C---C-T--AA-T--AC-A-T-G--C-A-A-G--T-C--GA-A-CG-A---------G-A--------------------------------------------------T-C------------------------TTC-G------------------------------G--G------------------------------------------TC--T-------AG-T-G-G-C-GC-A--C--G-GG-T-G-C-G-T-A--AC-G-C-G-T-G-GG---A-A-T-CT-G-C-C-CTT--GG-G-T-T-C--G-G-A---AT-AA-C--GT--C-G-G-G-A-A-A-----…
>H97X84I02F4ZTW
A-G-C-G-A--A-C-G-C--T-G-G-C-G-G--C-A-G-G--C---T-T--AA-C--AC-A-T-G--C-A-A-G--T-C--GA-G-CG-G---------G-C------------------------------------------------G-T-A------------------------GCA-A------------------------------T--A--C---------------------------------------GT--C-------AG-C-G-G-C-AG-A--C--G-GG-T-G-A-G-T-A--AC-G-C-G-T-G-GG---A-A-C-GT-A-C-C-TTT--TG-G-T-T-C--G-G-A---AC-AA-C--AC--A-G-G-G-A-A-A-----…
>H97X84I02JQYFF
A-T-T-G-A--A-C-G-C--T-G-G-C-G-G--C-A-T-G--C---C-T--TA-C--AC-A-T-G--C-A-A-G--T-C--GA-A-CG-----------G-TAA--C-A--G--------------------------------------G-T-C------------------------TTC-G------------------------------G--A--T---------------------------G-C-T----G--AC--G-------AG-T-G-G-C-GA-A--C--G-GG-T-G-A-G-T-A--AT-A-C-A-T-C-GG---A-A-C-GT-G-C-C-CAG--AC-G-T-G-G--G-G-G---AT-AA-C--GA--G-G-C-G-A-A-A-----…
>H97X84I02IWDL6
A-A-C-G-A--A-C-G-C--T-G-G-C-G-G--C-A-T-G--T---C-T--AA-C--AC-A-T-G--C-A-A-G--T-C--GA-A-CG-A---------G-A--------------------------------------------------C-C------------------------TTC-G------------------------------G--G------------------------------------------CC--T-------AG-T-G-G-C-GC-A--C--G-GG-T-G-C-G-T-A--AC-G-C-G-T-G-GG---A-A-T-CT-G-C-C-CTT--GG-G-T-T-C--G-G-A---AT-AA-C--TC--G-C-C-G-A-G-A-----…
>H97X84I02HPAS5
G-A-C-G-A--A-C-G-C--T-G-G-C-G-G--C-G-T-G--C---T-T--AA-C--AC-A-T-G--C-A-A-G--T-C--GA-A-CG-A---------T-G----A-T--G--------------C-T--------------CC-A---G---C--------------------------T-T------------------------------G-----C---T-G--GGG------------------T-G----G--AT--T-------AG-T-G-G-C-GA-A--C--G-GG-T-G-A-G-T-A--AC-A-C-G-T-G-AG---TAA-C-CT-G-C-C-CCC--TT-C-T-T-C--G-G-G---AT-AA-G--CT--T-G-G-G-A-A-A-----…
>H97X84I02H4Q2U
A-T-T-G-A--A-C-G-C--T-G-G-C-G-G--C-A-T-G--C---C-T--TA-C--AC-A-T-G--C-A-A-G--T-C--GA-A-CG-----------G-TAA--C-A--G----------------------------------------G--------------------------TT--A---------------------------------A------------------------------G-C-T----G--AC--G-------AG-T-G-G-C-GA-A--C--G-GG-T-G-A-G-T-A--AT-A-T-A-T-C-GG---A-A-C-GT-G-C-C-CAG--TC-G-T-G-G--G-G-G---AT-AA-C--TG--C-T-C-G-A-A-A-----…
>H97X84I02I0T3L
A-T-T-G-A--A-C-G-C--T-G-G-C-G-G--C-A-T-G--C---C-T--TA-C--AC-A-T-G--C-A-A-G--T-C--GA-A-CG-----------G-TAA--C-A--G----------------------------------------GTC------------------------TTCGGA--------------------------------T------------------------------G-C-T----G--AC--G-------AG-T-G-G-C-GA-A--C--G-GG-T-G-A-G-T-A--AT-A-C-A-T-C-GG---A-A-C-GT-G-C-C-CGA--TC-G-T-G-G--G-G-G---AT-AA-C--TG--C-T-C-G-A-A-A-----…
>H97X84I02GV02Q
A-A-C-G-A--A-C-G-C--T-G-G-C-G-G--C-A-G-G--C---T-T--AA-C--AC-A-T-G--C-A-A-G--T-C--GA-G-CG-C---------C-C----------------------------------------------------C------------------------GCA-A------------------------------G---------------------------------------------GG--G-------AG-C-G-G-C-AG-A--C--G-GG-T-G-A-G-T-A--AC-G-C-G-T-G-GG---A-A-T-CT-A-C-C-CAT--CA-C-T-A-C--G-G-A---AC-AA-C--TC--C-G-G-G-A-A-A-----…
>H97X84I02FVIZ1
A-T-T-G-A--A-C-G-C--T-G-G-C-G-G--C-A-G-G--C---T-T--AA-C--AC-A-T-G--C-A-A-G--T-C--GA-G-CG-G---------A-G----A-T--G----------------------------------A-G-G-T-G------------------------CTT-G------------------------------C--A--C-C-T-------------------------T-A----T--CT--T-------AG-C-G-G-C-GG-A--C--G-GG-T-G-A-G-T-A--AT-G-C-T-T-A-GG---A-A-T-CT-G-C-C-TAT--TA-G-T-G-G--G-G-G---AC-AA-C--AT--T-C-C-G-A-A-A-----…
>H97X84I02JXXNS
A-A-C-G-A--A-C-G-C--T-G-G-C-G-G--C-A-G-G--C---T-T--AA-C--AC-A-T-G--C-A-A-G--T-C--GA-A-CG-----------G-TAA--C-A--G--------------------------------------G----------------------------TT------------------------------------A--A---------------------------G-C-T----G--AC--G-------AG-T-G-G-C-GA-A--C--G-GG-T-G-A-G-T-A--AT-A-T-A-T-C-GG---A-A-C-GT-G-C-C-CAG--TC-G-T-G-G--G-G-G---AT-AA-C--TG--C-T-C-G-A-A-A-----…
>H97X84I02JVS7V
A-T-T-G-A--A-C-G-C--T-G-G-C-G-G--C-A-T-G--C---C-T--TA-C--AC-A-T-G--C-A-A-G--T-C--GA-A-CG-----------G-TAA--C-A--G--------------------------------------G----------------------------TT------------------------------------A--A---------------------------G-C-T----G--AC--G-------AG-T-G-G-C-GA-A--C--G-GG-T-G-A-G-T-A--AT-A-C-A-T-C-GG---A-A-C-GT-G-C-C-CGA--TC-G-T-G-G--G-G-G---AT-AA-C--GA--G-G-C-G-A-A-A-----…
>H97X84I02JS1C9
A-A-C-G-A--A-C-G-C--T-G-G-C-G-G--C-A-T-G--C---C-T--AA-C--AC-A-T-G--C-A-A-G--T-C--GA-A-CG-A---------G-A--------------------------------------------------C-C------------------------TTC-G------------------------------G--G------------------------------------------TT--T-------AG-T-G-G-C-GC-A--C--G-GA-T-G-C-G-T-A--AC-G-C-G-T-G-GG---A-A-T-CT-G-C-C-CTT--GG-G-T-T-C--G-G-A---AT-AA-C--TC--G-C-C-G-A-A-A-----…
>H97X84I02JNVZL
A-T-T-G-A--A-C-G-C--T-G-G-C-G-G--C-A-T-G--C---T-T--TA-C--AC-A-T-G--C-A-A-G--T-C--GA-A-CG-----------G-TAA--C-A--G--------------------------------------G-T-C------------------------TTC-G------------------------------G--A--T---------------------------G-C-T----G--AC--G-------AG-T-G-G-C-GA-A--C--G-GG-T-G-A-G-T-A--AT-A-C-A-T-C-GG---A-A-C-GT-G-C-C-TAG--TA-G-T-G-G--G-G-G---AT-AA-C--TA--C-T-C-G-A-A-A-----…
>H97X84I02J4JH2
A-T-T-G-A--A-C-G-C--T-G-G-C-G-G--C-A-T-G--C---C-T--TA-C--AC-A-T-G--C-A-A-G--T-C--GA-A-CG-----------G-CAG--C-A--C------------------------------------G-G-A-C------------------------TTC-G------------------------------G--T--C-T-------------------------G-G-T----G--GC--G-------AG-T-G-G-C-GA-A--C--G-GG-T-G-A-G-T-A--AT-G-T-A-T-C-GG---A-A-C-GT-A-C-C-TTT--CA-G-T-G-G--G-G-G---AT-AA-C--GT--A-G-C-G-A-A-A-----…
>H97X84I02I790C
A-A-C-G-A--A-C-G-C--T-G-G-C-G-G--C-A-T-G--C---C-T--AA-C--AC-A-T-G--C-A-A-G--T-C--GA-A-C------------G-C--------------------------------------------------C-C------------------------CGC-A------------------------------A--G------------------------------------------GG--G-------AG-C-G-G-C-AG-A--C--G-GG-T-G-A-G-T-A--AC-G-C-G-T-G-GG---A-A-T-CT-G-C-C-CTT--GG-G-T-T-C--G-G-A---AT-AA-C--TC--G-C-C-G-A-A-A-----…
>H97X84I02IOT43
G-A-C-G-A--A-C-G-C--T-G-G-C-G-G--C-G-C-G--C---T-T--AA-C--AC-A-T-G--C-A-A-G--T-C--GA-A-CG-----------A-TG---A-T--G------------------------------------CTC-CAG------------------------CTT-G------------------------------CTGG--G-G---------------------------T-G----G--AT--T-------AG-T-G-G-C-GA-A--C--G-GG-T-G-A-G-T-A--AC-A-C-G-T-G-AG---TAA-C-CT-G-C-C-CCC--TT-C-T-T-C--G-G-G---AT-AAGC--T---T-G-G-G-A-A-A----C…
>H97X84I02IMZJ2
G-A-T-G-A--A-C-G-C--T-A-G-C-G-G--C-A-G-G--C---T-T--AA-T--AC-A-T-G--C-A-A-G--T-C--GA-G-GG-----------G-CAT--C-A--G-------------------------------CT-T---A-T-A------------------------GCA-A------------------------------T--A--T---A-G--G------------------G-C-T----G--GC--G-------AC-C-G-G-C-AA-A--C--G-GG-T-G-C-G-G-A--AC-A-C-G-T-A-CA---CAA-C-CT-T-C-C-TAC--AA-G-T-G-G--G-G-A---AT-AG-C--CC--A-G-A-G-A-A-A-----…
>H97X84I02FF3VN
G-A-C-G-A--A-C-G-C--T-G-G-C-G-G--C-G-T-G--C---T-T--AA-C--AC-A-T-G--C-A-A-G--T-C--GA-A-CG-------------G------A----------------------------------A--A-G-G---C------------------------CCT-G------------------------------C--T--T-T-T-G--TGG------------------G-GT---G--CTC-G-------AG-T-G-G-C-GA-A--C--G-GG-T-G-A-G-T-A--AC-G-C-G-T-A-GG---TAA-C-CT-G-C-C-TTG--TA-G-C-G-G--G-G-G---AT-AA-C--TA--T-T-G-G-A-A-A-----…
>H97X84I02HR2ND
G-A-T-G-A--A-C-G-C--T-A-G-C-G-G--G-A-G-G--C---C-T--AA-C--AC-A-T-G--C-A-A-G--C-C--GA-G-CG-----------G-TA---G-A--G------------------------------------A-T-T-C------------------------TTC-G------------------------------G--A--A-T---------------------------C-T----T--GA--G-------AG-C-G-G-C-GC-A--C--G-GG-T-G-C-G-G-A--AC-A-C-G-T-G-TGC---AA-C-CT-G-C-C-TTT--AT-C-T-G-G--G-G-G---AT-AG-C--CT--T-T-C-G-A-A-A-----…
>H97X84I02FD521
A-T-T-G-A--A-C-G-C--T-G-G-C-G-G--C-A-T-G--C---C-T--TA-C--AC-A-T-G--C-A-A-G--T-C--GA-A-CG-----------GCAGCG-C-G--G----------------------------------------GA-------------------------GC--A---------------------------------AT-----------------------------C-C-TGGC-G--GC--G-------AG-T-G-G-C-GA-A--C--G-GG-T-G-A-G-T-A--AT-A-T-A-T-C-GG---A-A-C-GT-G-C-C-CAG--TC-G-T-G-G--G-G-G---AT-AA-C--TG--C-T-C-G-A-A-A-----…
>H97X84I02HGAIJ
G-A-C-G-A--A-C-G-C--T-G-G-C-G-G--C-G-T-G--C---C-T--AA-T--AC-A-T-G--C-A-A-G--T-C--GA-G-CG-A---------G-C----T-G--A---ATTC--AAA----G--------------A----T-C-C-C------------------------TTC-G------------------------------G--G--G-T------GA-----TTTGTT-G------G-A----C--GC--T-------AG-C-G-G-C-GG-A--T--G-GG-T-G-A-G-T-A--AC-A-C-G-T-G-GG---CAA-T-CT-G-C-C-CTA--AA-G-A-C-T--G-G-G---AT-AC-C--AC--T-T-G-G-A-A-A-----…
>H97X84I02HB36N
A-A-C-G-A--A-C-G-C--T-G-G-C-G-G--C-A-T-G--C---C-T--TA-C--AC-A-T-G--C-A-A-G--T-C--GA-A-CG-----------G-TAA--C-A--G----------------------------------------G--------------------------TT--A---------------------------------A------------------------------G-C-T----G--AC--G-------AG-T-G-G-C-GA-A--C--G-GG-T-G-A-G-T-A--AT-A-T-A-T-C-GG---A-A-C-GT-G-C-C-CAG--TC-G-T-G-G--G-G-G---AT-AA-C--TG--C-T-C-G-A-A-A-----…
>H97X84I02FLE4X
A-A-C-G-A--A-C-G-C--T-G-G-C-G-G--C-A-T-G--C---C-T--AA-C--AC-A-T-G--C-A-A-G--T-C--GA-ACGAGA---------C-C----------------------------------------------------T------------------------TCG-G------------------------------G---------------------------------------------TC--T-------AG-T-G-G-C-GC-A--C--G-GG-T-G-C-G-T-A--AC-G-C-G-T-G-GG---A-A-T-CT-A-C-C-CAT--CA-C-T-A-C--G-G-A---AC-AA-C--TC--C-G-G-G-A-A-A-----…
>H97X84I02F0K0Q
A-A-C-G-A--A-C-G-C--T-G-G-C-G-G--C-A-T-G--C---C-T--AA-C--AC-A-T-G--C-A-A-G--T-C--GA-A-CG-A---------G-A--------------------------------------------------C-C------------------------TTC-G------------------------------G--G------------------------------------------TC--T-------AG-T-G-G-C-GC-A--C--G-GG-T-G-C-G-T-A--AC-G-C-G-T-G-GG---A-A-T-CT-G-C-C-CTC--AG-G-T-T-C--G-G-A---AT-AA-C--AG--C-G-A-G-A-A-A-----…
>H97X84I02GWJ2H
A-T-T-G-A--A-C-G-C--T-G-G-C-G-G--A-A-T-G--C---T-T--TA-C--AC-A-T-G--C-A-A-G--T-C--GA-G-CG-----------G-CAG--C-G--C--------------------------------------G-G-G------------------------GCA-A------------------------------C--C--T---------------------------G-G-C----G--GC--G-------AG-C-G-G-C-GA-A--C--G-GG-T-G-A-G-T-A--AT-A-C-A-T-C-GG---A-A-C-GT-G-C-C-CAG--AC-G-T-G-G--G-G-G---AT-AA-C--TA--C-T-C-G-A-A-A-----…
>H97X84I02GEQUU
G-A-T-G-A--A-C-G-C--T-A-G-C-G-G--G-A-G-G--C---C-T--AA-C--AC-A-T-G--C-A-A-G--C-C--GA-G-CG-A---------T-A----T-T--G------------------------------------T-T-T-C------------------------TTC-G------------------------------G--A--A-A---------------------------T-G----A--GA--G-------AG-C-G-G-C-GT-A--C--G-GG-T-G-C-G-G-A--AC-A-C-G-T-G-TG---CAA-C-CT-G-C-C-TTT--AT-C-T-G-G--G-G-G---AT-AG-C--CT--T-T-C-G-A-A-A-----…
>H97X84I02GC6MX
A-A-C-G-A--A-C-G-C--T-G-G-C-G-G--C-A-T-G--C---C-T--TA-C--AC-A-T-G--C-A-A-G--T-C--GA-A-CG-----------G-TAA--C-A--G----------------------------------------GTC------------------------TTCGGA--------------------------------T------------------------------G-C-T----G--AC--G-------AG-T-G-G-C-GA-A--C--G-GG-C-G-A-G-T-A--AT-A-C-A-T-C-GG---A-A-C-GT-G-C-C-CAG--TC-G-T-G-G--G-G-G---AT-AA-C--TG--C-T-C-G-A-A-A-----…
>H97X84I02GA4YE
G-A-T-G-A--A-C-G-C--T-G-G-C-G-G--C-G-T-G--C---T-T--AA-C--AC-A-T-G--C-A-A-G--T-C--GAACGGAACTGTC-----A-T----T-T--T--------------T-G--------------AA-GCAAT-TAG------------------------CTT-G------------------------------CTAAGGGTGGAAATGTTGG-----------------C-A----G--TT--T-------AG-T-G-G-C-GG-A--C--G-GG-T-G-A-G-T-A--AC-G-C-G-T-G-GG---TAA-C-CT-G-C-C-TTA--CA-C-A-G-G--G-G-G---AT-AA-C--AC--C-T-G-G-A-A-A-----…
>H97X84I02G5Y4A
A-T-T-G-A--A-C-G-C--T-G-G-C-G-G--C-A-G-G--C---C-T--AA-C--AC-A-T-G--C-A-A-G--T-C--GA-G-CG-----------G-AT---G-A--G----------------------------------A-G-G-A-G------------------------CTT-G------------------------------C--T--C-C-T-------------------------T-G----A--TT--T-------AG-C-G-G-C-GG-A--C--G-GG-T-G-A-G-T-A--AT-G-C-C-T-A-GG---A-A-T-CT-G-C-C-TGG--TA-G-T-G-G--G-G-G---AT-AA-C--GT--T-C-C-G-A-A-A-----…
>H97X84I02IY1H3
A-T-T-G-A--A-C-G-C--T-G-G-C-G-G--C-A-T-G--C---C-T--TA-C--AC-A-T-G--C-A-A-G--T-C--GA-ACGGTAA--------C-A--------------------------------------------------G-G------------------------TTAAGC-----------------------------T--G------------------------------------------AC--G-------AG-T-G-G-C-GA-A--C--G-GG-T-G-C-G-T-A--AC-G-C-G-T-G-GG---A-A-T-CT-G-C-C-CTT--GG-G-T-T-C--G-G-A---AT-AA-C--TC--G-C-C-G-A-A-A-----…
>H97X84I02FVG66
A-A-C-G-A--A-C-G-C--T-G-G-C-G-G--C-A-G-G--C---T-T--AA-C--AC-A-T-G--C-A-A-G--T-C--GA-G-CG-----------G-CAG--C-G--C------------------------------------G-G-G-G------------------------GCA-A------------------------------C--C--C-T-------------------------G-G-C----G--GC--G-------AG-C-G-G-C-GA-A--C--G-GG-T-G-A-G-T-A--AT-G-C-A-T-C-GG---A-A-C-GT-A-T-C-CTG--TA-G-T-G-G--G-G-G---AT-AA-C--CC--A-G-C-G-A-A-A-----…
>H97X84I02FXCM3
A-T-T-G-A--A-C-G-C--T-G-G-C-G-G--C-A-T-G--C---C-T--TA-C--AC-A-T-G--C-A-A-G--T-C--GA-A-CG-----------G-CAG--C-G--C------------------------------------G-G-G-A------------------------GCA-A------------------------------T--C--C-T-------------------------G-G-C----G--GC--G-------AG-T-G-G-C-GA-A--C--G-GG-T-G-A-G-T-A--AT-A-C-A-T-C-GG---A-A-C-GT-G-C-C-CAA--TC-G-T-G-G--G-G-G---AT-AA-C--GC--A-G-C-G-A-A-A-----…
>H97X84I02IUKM7
A-T-T-G-A--A-C-G-C--T-G-G-C-G-G--C-A-T-G--C---C-T--TA-C--AC-A-T-G--C-A-A-G--T-C--GA-A-CG-----------G-CAG--C-G--C--------------------------------------G-G-G------------------------AGC--------------------------------A--A--T---------------------------C-C-TGGC-G--GC--G-------AG-T-G-G-C-GA-A--C--G-GG-T-G-A-G-T-A--AT-A-C-A-T-C-GG---A-A-C-GT-G-C-C-CGA--TC-G-T-G-G--G-G-G---AT-AA-C--GA--A-G-C-G-A-A-A-----…
>H97X84I02F2HXA
A-G-T-G-A--A-C-G-C--T-G-G-C-G-G--T-A-G-G--C---C-T--AA-C--AC-A-T-G--C-A-A-G--T-C--GA-A-CG-----------GCAGCACAGGA-GA---------------------------------------GC-------------------------TTGCT---------------------------------T------------------------------T-CTTGGC-G--GC--G-------AG-T-G-G-C-GA-A--C--G-GG-T-G-A-G-T-A--AT-G-T-A-T-C-GG---A-A-C-GT-G-C-C-CAG--TA-G-C-G-G--G-G-G---AT-AA-C--TG--G-C-C-G-A-A-A-----…
>H97X84I02JXGAB
G-A-T-G-A--A-C-G-C--T-A-G-C-G-G--G-A-G-G--C---C-T--AA-C--AC-A-T-G--C-A-A-G--T-C--GA-A-CG-G---------G-A----TCC--C------------------------------------C-G-A-G------------------------CAA-T------------------------------C-----G-G---------------------------G-G----T--GA--G-------AG-T-G-G-C-GC-A--C--G-GG-T-G-A-G-T-A--AC-G-C-G-T-A-TG---CAA-C-CT-G-C-C-TTT--AA-C-T-G-A--G-G-G---AT-AG-C--CC--A-T-A-G-A-A-A-----…
>H97X84I02JXDR2
A-T-T-G-A--A-C-G-C--T-G-G-C-G-G--C-A-T-G--C---C-T--AA-C--AC-A-T-G--C-A-A-G--T-C--GA-A-CG-A---------G-A--------------------------------------------------C-C------------------------TTC-G------------------------------G--G------------------------------------------TC--T-------AG-T-G-G-C-GC-A--C--G-GG-T-G-C-G-T-A--AC-G-C-G-T-G-GG---A-A-T-CT-G-C-C-CTT--GG-G-T-T-C--G-G-A---AT-AA-C---G--TCG-G-G-A-A-A----C…
>H97X84I02JWPDS
A-G-C-G-A--A-C-G-C--T-G-G-C-G-G--C-A-G-G--C---T-T--AA-C--AC-A-T-G--C-A-A-G--T-C--GA-G-CG-G---------G-C------------------------------------------------G-T-A------------------------GCA-A------------------------------T--A--C---------------------------------------GT--C-------AG-C-G-G-C-AG-A--C--G-GG-T-G-A-G-T-A--AC-G-C-G-T-G-GG---A-A-C-GT-A-C-C-TTT--TG-G-T-T-C--G-G-A---AC-AA-C--AC--A-G-G-G-A-A-A-----…
>H97X84I02JSTQB
A-A-C-G-A--A-C-G-C--T-G-G-C-G-G--C-A-T-A--C---C-T--AA-C--AC-A-T-G--C-A-A-G--T-C--GA-A-CG-A---------G-A--------------------------------------------------C-C------------------------TTC-G------------------------------G--G------------------------------------------TC--T-------AG-T-G-G-C-GC-A--C--G-GG-T-G-C-G-T-A--AC-G-C-G-T-G-GG---A-A-T-CT-G-C-C-CTT--GG-G-T-T-C--G-G-A---AT-AA-C--TC--G-C-C-G-A-A-A-----…
>H97X84I02JQWQS
A-A-C-G-A--A-C-G-C--T-G-G-C-G-G--C-A-G-G--C---T-T--AA-C--AC-A-T-G--C-A-A-G--T-C--GA-G-CG-C---------C-C----------------------------------------------------C------------------------GCA-A------------------------------G---------------------------------------------G---G------AGG-C-G-G-C-AG-A--C--G-GG-T-G-A-G-T-A--AC-G-C-G-T-G-GG---A-A-T-CT-A-C-C-CAT--CA-C-T-A-C--G-G-A---AC-AA-C--TC--C-G-G-G-A-A-A-----…
>H97X84I02JPZFG
A-T-T-G-A--A-C-G-C--T-A-G-C-G-G--G-A-T-G--C---T-T--TA-C--AC-A-T-G--C-A-A-G--T-C--GA-A-CG-----------G-CAG--C-G--C----------------G--------------A--G-A-A-A-G------------------------CTT-G------------------------------C--T--T---T-C--TT-----------------G-G-C----G--GC--G-------AG-T-G-G-C-GA-A--C--G-GG-T-G-A-G-T-A--AT-G-T-A-T-C-GG---A-A-C-GT-G-C-C-CAG--TA-G-C-G-G--G-G-G---AT-AA-C--TG--G-C-C-G-A-A-A-----…
>H97X84I02JPA13
G-A-T-G-A--A-C-G-C--T-G-G-C-G-G--C-G-T-G--C---T-T--AA-C--AC-A-T-G--C-A-A-G--T-C--GA-A-CG-G---------G-C------T--CA-----------------------------TAT-T-GAA-A-C------------------------CTA-G------------------------------T--G--A-T-T-T--A--------------------T------GA-GT--T-------AG-T-G-G-C-GG-A--C--G-GG-T-G-A-G-T-A--AC-G-C-G-T-G-GA---AAA-C-CT-G-C-C-GTA--TA-C-T-G-G--G-G-G---AT-AA-C--AC--T-T-A-G-A-A-A-----…
>H97X84I02JNMLG
A-T-T-G-A--A-C-G-C--T-G-G-C-G-G--C-A-T-G--C---C-T--TA-C--AC-A-T-G--C-A-A-G--T-C--GA-A-CG-----------G-TAA--C-A--G--------------------------------------G----------------------------TT------------------------------------A--A---------------------------G-C-T----G--AC--G-------AG-T-G-G-C-GA-A--C--G-GG-T-G-A-G-T-A--AT-A-T-A-T-C-GG---A-A-C-GT-G-C-C-CGA--TC-G-T-G-G--G-G-G---AT-AA-C--GA--A-G-C-G-A-A-A-----…
>H97X84I02JNIQ9
G-A-C-G-A--A-C-G-C--T-G-G-C-G-G--C-G-T-G--C---T-T--AA-C--AC-A-T-G--C-A-A-G--T-C--GA-A-CG-A---------G-A--------------------------------------------------C-C------------------------TTC-G------------------------------G--G------------------------------------------TC--T-------AG-T-G-G-C-GC-A--C--G-GG-T-G-C-G-T-A--AC-G-C-G-T-G-GG---A-A-T-CT-G-C-C-CTT--GG-G-C-T-C--G-G-A---AT-AA-C--TC--G-C-C-G-A-A-A-----…
>H97X84I02JLAKZ
A-A-C-G-A--A-C-G-C--T-G-G-C-G-G--C-A-G-G--C---T-T--AA-C--AC-A-T-G--C-A-A-G--T-C--GA-A-CG-----------G-TAA--C-A--G----------------------------------------G--------------------------TT--A---------------------------------A------------------------------G-C-C----G--AC--G-------AG-T-G-G-C-GA-A--C--G-GG-T-G-A-G-T-A--AT-A-T-A-T-C-GG---A-A-C-GT-G-C-C-CAG--TC-G-T-G-G--G-G-G---AT-AA-C--TG--C-T-C-G-A-A-A-----…
>H97X84I02JKFXX
A-A-C-G-A--A-C-G-C--T-G-G-C-G-G--C-A-T-G--C---C-T--AA-C--AC-A-T-G--C-A-A-G--C-C--GA-A-CG-A---------G-A--------------------------------------------------C-C------------------------TTC-G------------------------------G--G------------------------------------------TC--T-------AG-T-G-G-C-GC-A--C--G-GG-T-G-C-G-T-A--AT-G-C-G-T-G-GG---A-A-T-CT-G-C-C-CTT--GG-G-T-T-C--G-G-A---AC-AA-C--TC--G-C-C-G-A-A-A-----…
>H97X84I02JH3DW
G-A-T-G-A--A-C-G-C--T-A-G-C-G-G--G-A-G-G--C---C-T--AA-C--AC-A-T-G--C-A-A-G--C-C--GA-G-CG-G---------T-A----T-T--T------------------------------------G-T-T-C------------------------TTC-G------------------------------G--A--A-C---------------------------A-G----A--GA--G-------AG-C-G-G-C-GC-A--C--G-GG-T-G-C-G-G-A--AC-A-C-G-T-G-TG---CAA-C-CT-G-C-C-TTT--AT-C-T-G-G--G-G-G---AT-AG-C--CT--T-T-C-G-A-A-A-----…
>H97X84I02JBT24
A-A-C-G-A--A-C-G-C--T-G-G-C-G-G--C-A-T-G--C---C-T--AA-C--AC-A-T-G--C-A-A-G--T-C--GA-A-CG-A---------G-A--------------------------------------------------C-C------------------------TTC-G------------------------------G--G------------------------------------------TC--T-------AG-T-G-G-C-GC-A--C--G-GG-T-G-C-G-T-A--AC-G-C-G-T-G-GG---A-A-T-CT-G-C-C-CTT--GG-G-T-T-C----G-A---AT-AA-C--TC--G-C-C-G-A-A-A-----…
>H97X84I02JBA1S
A-A-C-G-A--A-C-G-C--T-G-A-C-G-G--C-A-G-G--C---T-T--AA-C--AC-A-T-G--C-A-A-G--T-C--GA-G-CG-G---------G-C------------------------------------------------A-T-A------------------------GCA-A------------------------------T--A--T---------------------------------------GT--C-------AG-C-G-G-C-AG-A--C--G-GG-T-G-A-G-T-A--AC-G-C-G-T-G-GG---A-A-C-GT-A-C-C-TTT--TG-G-T-T-C--G-G-A---AC-AA-C--AC--A-G-G-G-A-A-A-----…
>H97X84I02JAG5A
G-A-C-G-A--A-C-G-C--T-G-G-C-G-G--C-G-T-G--C---C-T--AA-T--AC-A-T-G--C-A-A-G--T-C--GA-G-CG-A---------A-C------A--G-------------------------------ATAA-G-G-A-G------------------------CTT-G------------------------------C--T--C-C-T-T--T--------------------G-A----C--GT--T-------AG-C-G-G-C-GG-A--C--G-GG-T-G-A-G-T-A--AC-A-C-G-T-G-GG---CAA-C-CT-G-C-C-CTA--TA-G-T-T-G--G-G-G---AT-AA-C--TC--C-G-G-G-A-A-A-----…
>H97X84I02J1CI4
A-T-T-G-A--A-C-G-C--T-G-G-C-G-G--C-A-T-G--C---C-T--TA-C--AC-A-T-G--C-A-A-G--T-C--GA-A-CG-----------G-TAA--C-A--G--------------------------------------G----------------------------TT------------------------------------A--A---------------------------G-C-T----G--AC--G-------AG-T-G-G-C-GA-A--C--G-GG-T-G-A-G-T-A--AT-A-T-A-T-C-GG---A-A-C-GT-G-C-C-CAG--TC-G-T-G-G--G-G-G---AT-AA-C--TG--C-T-C-G-A-A-A-----…
>H97X84I02J04KN
A-A-C-G-A--A-C-G-C--T-G-G-C-G-G--C-A-T-G--C---C-T--AA-C--AC-A-T-G--C-A-A-G--T-C--GA-A-CG-G---------G-A----TCC--C------------------------------------C-G-A-G------------------------CAA-T------------------------------C-----G-G---------------------------G-G----T--GA--G-------AG-T-G-G-C-GC-A--C--G-GG-T-G-A-G-T-A--AC-G-C-G-T-A-TG---CAA-C-CT-G-C-C-TTT--AA-C-T-G-A--G-G-G---AT-AG-C--CC--A-T-A-G-A-A-A-----…
>H97X84I02IZM3N
A-A-C-G-A--A-C-G-C--T-G-G-C-G-G--C-A-T-G--C---C-T--TA-C--AC-A-T-G--C-A-A-G--T-C--GA-A-CG-----------G-TAA--C-A--G----------------------------------------G--------------------------TT--A---------------------------------A------------------------------G-C-T----G--AC--G-------AG-T-G-G-C-GA-A--C--G-GG-T-G-A-G-T-A--AT-A-T-A-T-C-GG---A-A-C-GT-G-C-C-CAG--TC-G-T-G-G--G-G-G---AT-AA-C--TG--C-T-C-G-A-A-A-----…
>H97X84I02IY43R
A-A-C-G-A--A-C-G-C--T-G-G-C-G-G--C-A-G-G--C---T-T--AA-C--AC-A-T-G--C-A-A-G--T-C--GA-G-CG-C---------C-C----------------------------------------------------C------------------------GCA-A------------------------------G---------------------------------------------GG--G-------AG-C-G-G-C-GG-A--C--G-GG-T-G-A-G-T-A--AC-G-C-G-T-G-GG---A-A-T-CT-A-C-C-CAT--CA-C-T-A-C--G-G-A---AC-AA-C--TC--C-G-G-G-A-A-A-----…
>H97X84I02IMJ85
A-T-T-G-A--A-C-G-C--T-A-G-C-G-G--G-A-T-G--C---T-T--TA-C--AC-A-T-G--C-A-A-G--T-C--GA-A-CG-----------G-CAG--C-G--C------------------------------------G-G-A--------------------------CTT--------------------------------C--G--G-T-C-T---------------------G-G-C----G--GC--G-------AG-T-G-G-C-GA-A--C--G-GG-T-G-A-G-T-A--AT-G-T-A-T-C-GG---A-A-C-GT-G-C-C-CAG--TA-G-C-G-G--G-G-G---AT-AA-C--TA--C-G-C-G-A-A-A----G…
>H97X84I02IM7K4
A-T-T-G-A--A-C-G-C--T-G-G-C-G-G--C-A-C-G--C---C-T--TA-C--AC-A-T-G--C-A-A-G--T-C--GA-A-TG-----------G-TAA--C-A--G----------------------------------------G--------------------------TT--A---------------------------------A------------------------------G-C-T----G--AC--G-------AG-T-G-G-C-GA-A--C--G-GG-T-G-A-G-T-A--AT-A-T-A-T-C-GG---A-A-C-GT-G-C-C-CAG--TC-G-T-G-G--G-G-G---AT-AA-C--TG--C-T-C-G-A-A-A-----…
>H97X84I02FK853
A-A-C-G-A--A-C-G-C--T-G-G-C-G-G--C-A-G-G--C---T-T--AA-C--AC-A-T-G--C-A-A-G--T-C--G--A--G-C---------G-C--------------------------------------------------C-C------------------------CGC-A------------------------------A--G------------------------------------------GG--G-------AG-C-G-G-C-GC-A--C--G-GG-T-G-C-G-T-A--AC-G-C-G-T-G-GG---A-A-T-CT-G-C-C-CTT--GG-G-T-T-C--G-G-A---AT-AA-C--TC--G-C-C-G-A-A-A-----…
>H97X84I02FXZNJ
A-A-C-G-A--A-C-G-C--T-G-G-C-G-G--C-A-G-G--C---T-T--AA-C--AC-A-T-G--C-A-A-G--T-C--GA-G-C------------G-C------------------------------------------------C-C-C------------------------GC--A---------------------------------A--G---------------------------------------GG--G-------AG-C-G-G-C-AG-A--C--G-GG-T-G-A-G-T-A--AC-G-C-G-T-G-GG---A-A-C-GT-A-C-C-TTT--TG-G-T-T-C--G-G-A---AC-AA-C--AC--A-G-G-G-A-A-A-----…
>H97X84I02IGU1C
A-A-C-G-A--A-C-G-C--T-G-G-C-G-G--C-A-T-G--C---C-T--AA-C--AC-A-T-G--C-A-A-G--T-C--GA-G-CG-A---------G-A--------------------------------------------------T-C------------------------TTC-G------------------------------G--G------------------------------------------TC--T-------AG-T-G-G-C-GC-A--C--G-GG-T-G-C-G-T-A--AC-G-C-G-T-G-GG---A-A-T-CT-G-C-C-CTT--GG-G-T-T-C--G-G-A---AT-AA-CG-TC--G---G-G-A-A-A-----…
>H97X84I02IEB5S
A-T-T-G-A--A-C-G-C--T-G-G-C-G-G--C-A-T-G--C---C-T--AA-C--AC-A-T-G--C-A-A-G--T-C--GA-A-CG-A---------A-G--------------------------------------------------G-C------------------------TTC-G------------------------------G--C------------------------------------------CT--T-------AG-T-G-G-C-GC-A--C--G-GG-T-G-T-G-T-A--AC-G-C-G-T-G-GG---A-A-T-CT-G-C-C-CTC--AG-G-T-T-C--G-G-A---AT-AA-C--AG--C-A-A-G-A-A-A-----…
>H97X84I02IDN47
A-A-C-G-A--A-C-G-C--T-G-G-C-G-G--C-A-T-G--C---C-T--AA-C--AC-A-T-G--C-A-A-G--T-C--GA-A-CG-A---------G-A--------------------------------------------------C-C------------------------TTC-G------------------------------G--G------------------------------------------TC--T-------AG-T-G-G-C-GC-A--C--G-GG-T-G-C-G-T-A--AC-G-C-G-T-G-GG---A-A-T-CT-G-C-C-CTT--GG-G-T-T-C--G-G-A---AT-AA-CG-TC--G---G-G-A-A-A-----…
>H97X84I02IDM6N
G-A-T-G-A--A-C-G-C--T-A-G-C-G-G--C-A-G-G--C---C-T--AA-C--AC-A-T-G--C-A-A-G--T-C--GA-G-GG-----------G-TA---G-A--G------------------------------------G-A-A-G------------------------CTT-G------------------------------C--T--T-C---------------------------C-T----T--GA--G-------AC-C-G-G-C-GC-A--C--G-GG-T-G-C-G-T-A--AC-G-C-G-T-A-TG---CAA-T-CT-A-C-C-TTG--TA-C-A-G-A--G-G-G---AT-AG-C--CC--A-G-A-G-A-A-A-----…
>H97X84I02IATHB
A-T-T-G-A--A-C-G-C--T-G-G-C-G-G--C-A-T-G--C---C-T--TA-C--AC-A-T-G--C-A-A-G--T-C--GA-A-CG-----------G-TAA--C-A--G----------------------------------------G--------------------------TT--A---------------------------------A------------------------------G-C-T----G--AC--G-------AG-T-G-G-C-GA-A--C--G-GG-T-G-A-G-T-A--AT-A-T-A-T-C-GG---A-A-C-GT-G-C-C-CAG--TC-G-T-G-G--G-G-G---AT-GA-C--TG--C-T-C-G-A-A-A-----…
>H97X84I02IAFUO
A-A-C-G-A--A-C-G-C--T-G-G-C-G-G--C-A-T-G--C---C-T--AA-C--AC-A-T-G--C-A-A-G--T-C--GA-A-CG-A---------G-A--------------------------------------------------C-C------------------------TTC-G------------------------------G--G------------------------------------------TC--T-------AG-T-G-G-C-GC-A--C--G-GG-T-G-C-G-T-A--AC-G-C-G-T-G-GG---A-A-T-CT-G-C-C-CTT--GG-G-T-T-C--G-G-A---AT-AA-C--CC--G-C-C-G-A-A-A-----…
>H97X84I02I8149
A-A-C-G-A--A-C-G-C--T-G-G-C-G-G--C-A-G-G--C---T-T--AA-C--AC-A-T-G--C-A-A-G--T-C--GA-G-CG-C---------C-C----------------------------------------------------C------------------------GCA-A------------------------------G---------------------------------------------GG--G-------AG-C-G-G-C-AG-A--C--G-GG-T-G-A-G-T-A--AC-G-C-G-T-G-GG---A-A-T-CT-A-C-C-CAT--CA-C-T-A-C--G-G-A---AC-AA-C--TC--C-G-G-G-A-A-A-----…
>H97X84I02I5XHD
A-A-C-G-A--A-C-G-C--T-G-G-C-G-G--C-A-C-G--C---C-T--AA-C--AC-A-T-G--C-A-A-G--T-C--GA-A-CG-A---------G-A--------------------------------------------------C-C------------------------TTC--------------------------------G--G------------------------------------------TC--T-------AG-T-G-G-C-GC-A--C--G-GG-T-G-C-G-T-A--AC-G-C-G-T-G-GG---A-A-T-CT-G-C-C-CTT--GG-G-T-T-C--G-G-A---AT-GA-C--TC--G-C-C-G-A-A-A-----…
>H97X84I02I4MP2
A-A-C-G-A--A-C-G-C--T-G-G-C-G-G--C-A-G-G--C---T-T--AA-C--AC-A-T-G--C-A-A-G--T-C--GA-G-CG-C---------C-C----------------------------------------------------C------------------------GCA-A------------------------------G---------------------------------------------GG--G--------G-C-G-G-C-AG-A--C--G-GG-T-G-A-G-T-A--AC-G-C-G-T-G-GG---A-A-T-CT-A-C-C-CAT--CA-C-T-A-C--G-G-A---AC-AA-C--TC--C-G-G-G-A-A-A-----…
>H97X84I02I32R1
A-A-C-G-A--A-C-G-C--T-G-G-C-G-G--C-A-T-G--C---C-T--AA-T--AC-A-T-G--C-A-A-G--T-C--GA-A-CG-A---------G-A--------------------------------------------------T-C------------------------TTC-G------------------------------G--G------------------------------------------TC--T-------AG-T-G-G-C-GC-A--C--G-GG-T-G-C-G-T-A--AC-G-C-G-T-G-GG---A-A-T-CT-G-C-C-CTT--GG-G-T-T-C--G-G-A---AT-AA-CG-TC--G---G-G-A-A-A-----…
>H97X84I01BYBDT
A---C-G-A--A-C-G-C--T-G-G-C-G-G--C-G-T-G--C---T-T--AA-C--AC-A-T-G--C-A-A-G--T-C--GA-A-CG-----------GAAAGGCCCT--GCTT-------------------------------------T-------------------------TGT--G---------------------------------G------------------------------G-G-T----GC-TC--G-------AG-T-G-G-C-GA-A--C--G-GG-T-G-A-G-T-A--AT-A-T-A-T-C-GG---A-A-C-GT-G-C-C-CAG--TC-G-T-G-G--G-G-G---AT-AA-C--TG--C-T-C-G-A-A-A-----…
>H97X84I02HZEHX
A-A-C-G-A--A-C-G-C--T-G-G-C-G-G--C-A-T-G--C---C-T--AA-C--AC-A-T-G--C-A-A-G--T-C--GA-A-CG-----------G-AA---A-G--G--------------------------------C-C-C-T-G-C------------------------TTT-T------------------------------G--T--G-G-G-G-----------------------T-G----C--TC--G-------AG-T-G-G-C-GA-A--C--G-GG-T-G-A-G-T-A--AC-A-C-G-T-G-AG---TAA-C-CT-G-C-C-CTT--GA-C-T-T-T--G-G-G---AT-AA-C--TT--C-A-G-G-A-A-A-----…
>H97X84I02HY0VZ
A-A-C-G-A--A-C-G-C--T-G-G-C-G-G--C-A-T-G--C---C-T--AA-C--AC-A-T-G--C-A-A-G--T-C--GA-A-CG-A---------G-A--------------------------------------------------C-C------------------------TTC-G------------------------------G--G------------------------------------------TC--T-------AG-T-G-G-C-GC-A--C--G-GG-T-G-C-G-T-A--AC-A-C-G-T-G-GGC--A-A-T-CT-G-C-C-CTC--CG-A-T-G-G--G-G-A---AT-AA-C--CC--C-G-C-G-A-A-A-----…
>H97X84I02HXWUR
A-A-T-G-A--A-C-G-C--T-G-G-C-G-G--C-A-T-G--C---C-T--AA-C--AC-A-T-G--C-A-A-G--T-C--GA-A-CG-A---------A-G--------------------------------------------------G-C------------------------TTC-G------------------------------G--C------------------------------------------CT--T-------AG-T-G-G-C-GC-A--C--G-GG-T-G-C-G-T-A--AC-G-C-G-T-G-GG---A-A-T-CT-G-C-C-CTC--AG-G-T-T-C--G-G-A---AT-AA-C--AG--C-G-A-G-A-A-A-----…
>H97X84I02HVPEE
A-A-C-GTA--A-C-GAC--T-G-G-C-G-G--CGA-T-G--C---C-T--AA-CTTAC-A-T-G--C-G-A-G--TAC--GA-A-CGAA---------G-A--------------------------------------------------T-C------------------------TTC-G------------------------------G--G------------------------------------------TC--T-------AG-T-G-G-C-GC-A--C--G-GG-T-G-C-G-T-A--AC-G-C-G-T-G-GG---A-A-T-CT-G-C-C-CTT--GG-G-T-T-C--G-G-A---AT-AA-C--TC--G-C-C-G-A-A-A-----…
>H97X84I02F4YUR
A-A-C-G-A--A-C-G-C--T-G-G-C-G-G--C-A-G-G--C---T-T--AA-C--AC-A-T-G--C-A-A-G--T-C--GA-A-CG-----------G-TAA--C-A--G--------------------------------------G-T-C------------------------TTC-G------------------------------G--A--T---------------------------G-C-T----G--AC--G-------AG-T-G-G-C-GA-A--C--G-GG-T-G-A-G-T-A--AT-A-C-A-T-C-GG---A-A-C-GT-G-C-C-CGA--TC-G-T-G-G--G-G-G---AT-AA-C--GA--G-G-C-G-A-A-A-----…
>H97X84I02HQLI9
A-A-C-G-A--A-C-G-C--T-G-G-C-G-G--C-A-G-G--C---T-T--AA-C--AC-A-T-G--C-A-A-G--T-C--GA-G-CG-C---------C-C----------------------------------------------------C------------------------GCA-A------------------------------G---------------------------------------------GG--G-------AG-C-G-G-C-AG-A--C--G-GG-T-G-A-G-T-A--AC-G-C-G-T-G-GG---A-A-T-CT-A-C-C-CAT--CA-C-T-A-C--G-G-A---AC-AA-C--TC--C-G-G-G-A-A-A-----…
>H97X84I02HPUGV
A-T-T-G-A--A-C-G-C--T-G-G-C-G-G--C-A-T-G--C---C-T--TA-C--AC-A-T-G--C-A-A-G--T-C--GA-A-CG-----------G-TAA--C-A--G--------------------------------------G-T-C------------------------TTC-G------------------------------G--A--C---------------------------G-C-T----G--AC--G-------AG-T-G-G-C-GA-A--C--G-GG-T-G-A-G-T-A--AT-A-C-A-T-C-GG---A-A-C-GT-G-C-C-CGA--TC-G-T-G-G--G-G-G---AT-AA-C--GA--G-G-C-G-A-A-A-----…
>H97X84I02HPTWJ
A---T-G-A--A-C-G-C--T-A-G-C-G-G--G-A-G-G--C---C-T--AA-C--AC-A-T-G--C-A-A-G--T-C--GA-A-CG-----------G-TAA--C-A--G----------------------------------------G--------------------------TT--A---------------------------------A------------------------------G-C-T----G--AC--G-------AG-T-G-G-C-GA-A--C--G-GG-T-G-A-G-T-A--AT-A-T-A-T-C-GG---A-A-C-GT-G-C-C-CAG--TC-G-T-G-G--G-G-G---AT-AA-C--TG--C-T-C-G-A-A-A-----…
>H97X84I02HMEFH
A-T-T-G-A--A-C-G-C--T-G-G-C-G-G--C-A-T-G--C---T-T--TA-C--AC-A-T-G--C-A-A-G--T-C--GA-G-CG-----------G-CAG--C-G--C------------------------------------G-G-G-G------------------------GCA-A------------------------------C--C--C-T-------------------------G-G-C----G--GC--G-------AG-T-G-G-C-GA-A--C--G-GG-T-G-A-G-T-A--AT-A-T-A-T-C-GG---A-A-C-GT-G-C-C-CAT--TA-G-T-G-G--G-G-G---AT-AG-C--CC--G-G-C-G-A-A-A-----…
>H97X84I02HIS36
A-A-C-G-A--A-C-G-C--T-G-G-C-G-G--C-A-T-G--C---C-T--AA-C--AC-A-T-G--C-A-A-G--T-C--GA-A-CG-A---------G-A--------------------------------------------------C-C------------------------TTC-G------------------------------G--G------------------------------------------TC--T-------AG-T-G-G-C-GC-A--C--G-GG-T-G-C-G-T-A--AC-G-C-G-T-G-GG---A-A-T-CT-G-C-C-CTC--AG-G-T-T-C--G-G-A---AT-AA-CA-GC--G---A-G-A-A-AT----…
>H97X84I02HFNQT
A-T-T-G-A--A-C-G-C--T-G-G-C-G-G--C-A-T-G--C---C-T--CA-C--AC-A-T-G--C-A-A-G--T-C--GA-A-CG-----------G-CAG--C-A--C------------------------------------G-G-A-C------------------------TTC-A------------------------------G--T--C-T-------------------------G-G-T----G--GC--G-------AG-T-G-G-C-GA-A--C--G-GG-T-G-A-G-T-A--AT-G-T-A-T-C-GG---A-A-C-GT-A-C-C-CTT--CA-G-T-G-G--G-G-G---AT-AA-C--GT--A-G-C-G-A-A-A-----…
>H97X84I02HC5JB
G-A-T-G-A--A-C-G-C--T-A-G-C-G-G--C-A-G-G--C---T-T--AA-T--AC-A-T-G--C-A-A-G--T-C--GT-G-GG-----------G-CAG--C-G--C--------------------------------A-G-T-G-T-A------------------------GCA-A------------------------------T--A--C-A-T-G---------------------G-G-C----G--GC--G-------AC-C-G-G-C-AA-A--C--G-GG-T-G-C-G-G-A--AC-A-C-G-T-A-CA---CAA-C-CT-T-C-C-TAT--AA-G-T-G-G--G-G-A---AT-AG-C--CC--A-G-A-G-A-A-A-----…
>H97X84I02H79PG
G-A-T-G-A--A-C-G-C--T-A-G-C-G-G--C-A-G-G--C---T-T--AA-T--AC-A-T-G--C-A-A-G--T-C--GA-G-GG-----------G-CAT--C-A--G-------------------------------CT-T---A-T-A------------------------GCA-A------------------------------T--A--T---A-G--G------------------G-C-T----G--GC--G-------AC-C-G-G-C-AA-A--C--G-GG-T-G-C-G-G-A--AC-A-C-G-T-A-CA---CAA-C-CT-T-C-C-TAC--AA-G-T-G-G--G-G-A---AT-AG-C--CC--A-G-A-G-A-A-A-----…
>H97X84I02H5IJL
G-A-C-G-A--A-C-G-C--T-G-G-C-G-G--C-G-T-G--C---C-T--AA-T--AC-A-T-G--C-A-A-G--T-C--GA-G-CGAA---------C-A----G----A-------------------------------TA-A-G-G-A-G------------------------CTT-G------------------------------C--T--C-C-T----T--------------------T-G----A---C--GTT-----AG-C-G-G-C-GG-A--C--G-GG-T-G-A-G-T-A--AC-A-C-G-T-A-GG---CAA-C-CT-A-C-C-CTT--GA-G-A-T-T--G-G-G---AT-AA-C--TA--C-C-G-G-A-A-A-----…
>H97X84I02H4YC8
G-A-C-G-A--A-C-G-C--T-G-G-C-G-G--T-G-T-G--C---T-T--CA-C--AC-A-T-G--C-A-A-G--T-C--GA-A-CG-A---------G-G--------------------------------------------------T-A------------------------GCA-A------------------------------T--A------------------------------------------CC--T-------AG-T-G-G-C-GG-A--C--G-GG-T-G-A-G-T-A--AC-G-C-G-T-G-GG---A-A-T-CT-G-C-C-CTT--GG-G-T-T-C--G-G-A---AT-AA-C--TC--G-C-C-G-A-A-A-----…
>H97X84I02H3O35
A-A-C-G-A--A-C-G-C--T-G-G-C-G-G--C-A-T-G--C---C-T--AA-C--AC-A-T-G--C-A-A-G--T-C--GA-A-CG-A---------G-A--------------------------------------------------C-C------------------------TTC-G------------------------------G--G------------------------------------------TC--T-------AG-T-G-GAACGC-A--C--G-GG-T-G-C-G-T-A--AC-G-C-G-T-G-GG---A-A-T-CT-G-C-C-CTT--GG-G-T-T-C--G-G-A---AT-AA-C--TC--G-C-C-G-A-A-A-----…
>H97X84I02H3NX1
A-A-C-G-A--A-C-G-C--T-G-G-C-G-G--C-A-T-G--C---C-T--TA-C--AC-A-T-G--C-A-A-G--T-C--GA-A-CG-----------G-TAA--C-A--G--------------------------------------G-T-C------------------------TTC-G------------------------------G--A--T---------------------------G-C-T----G--AC--G-------AG-T-G-G-C-GA-A--C--G-GG-T-G-A-G-T-A--AT-A-C-A-T-C-GG---A-A-C-GT-G-C-C-CGA--TC-G-T-G-G--G-G-G---AT-AA-C--GA--G-G-C-G-A-A-A-----…
>H97X84I02H3MN3
G-A-T-G-A--A-C-G-C--T-G-G-C-G-G--C-G-T-G--C---T-T--AA-C--AC-A-T-G--C-A-A-G--T-C--GA-ACGG-A--------ACTGT---C-AT-T---------T------T-----------TGAAGCAAT-TAG-C-----------------------TTGCTAAG----------------------------G--G--T-G-G-A--AA-------T-----------GTTG--GCAGCT--T-------AG-T-G-G-C-GG-A--C----GG-T-G-A-G-T-A--AC-G-C-G-T-G-GG---TAA-C-CT-G-C-C-TTA--CA-C-A-G-G--G-G-G---AT-AA-C--AC--C-T-G-G-A-A-A-----…
>H97X84I02H3CON
A-T-T-G-A--A-C-G-C--T-G-G-C-G-G--C-A-T-G--C---C-T--AA-C--GC-A-T-G--C-A-A-G--T-C--GA-A-CG-A---------G-A--------------------------------------------------C-C------------------------TTC-G------------------------------G--G------------------------------------------TC--T-------AG-T-G-G-C-GT-A--C--G-GG-T-G-C-G-T-A--AC-G-C-G-T-G-GG---A-A-T-CT-G-C-C-CTT--GG-G-T-T-C--G-G-A---AT-AA-C--TC--G-C-C-G-A-A-A-----…
>H97X84I02H17WX
G-G-C-G-A--A-C-G-C--T-G-G-C-G-G--C-A-G-G--C---T-T--AA-C--AC-A-T-G--C-A-A-G--T-C--GA-G-CG-G---------G-C------------------------------------------------A-T-A------------------------GCA-A------------------------------T--A--T---------------------------------------GT--C-------AG-C-G-G-C-AG-A--C--G-GG-T-G-A-G-T-A--AC-G-C-G-T-G-GG---A-A-C-GT-A-C-C-TTT--TG-G-T-T-C--G-G-A---AC-AA-C--AC--A-G-G-G-A-A-A-----…
>H97X84I02H0XJM
G-A-C-G-A--A-C-G-C--T-G-G-C-G-G--T-G-T-G--C---T-T--CA-C--AC-A-T-G--C-A-A-G--T-C--GA-A-CG-A---------G-G--------------------------------------------------T-A------------------------GCA-A------------------------------T--A------------------------------------------CC--T-------AG-T-G-G-C-GG-A--C--G-GG-T-G-A-G-T-A--AC-G-C-G-T-G-GG---A-A-T-CT-G-C-C-TTT--AG-A-T-G-G--G-G-G---AT-AA-C--GG--G-C-C-G-A-A-A-----…
>H97X84I02H06PS
G-A-T-G-A--A-C-G-C--T-G-G-C-G-G--C-G-T-G--C---C-T--AA-T--AC-A-T-G--C-A-A-G--T-C--GA-G-CG-C---------G-A----G-A--T-------------------------------TA-A-G-G-A-G------------------------CTT-G------------------------------C--T--C-C-T-T--A--------------------A-T----C--TT--G-------AG-C-G-G-C-GG-A--C--G-GG-T-G-A-G-T-A--AC-A-C-G-T-A-GG---CAA-C-CT-A-C-C-CTT--GA-G-A-T-T--G-G-G---AT-AA-C--TA--C-C-G-G-A-A-A-----…
>H97X84I02GXGJ2
G-A-T-G-A--A-C-G-C--T-G-G-C-G-G--C-G-T-G--C---C-T--AA-T--AC-A-T-G--C-A-A-G--T-C--GA-A-CG-A---------A-A----C-T--T-------C-TTTATC-A--------------CC-G-A-G-T-G------------------------CTT-G------------------------------C--A--C-T-C-A--CCG--ATAAA-----------G-A----G--TT--G-------AG-T-G-G-C-GA-A--C--G-GG-T-G-A-G-T-A--AC-A-C-G-T-G-GG---CAA-C-CT-G-C-C-CAA--AA-G-A-G-G--G-G-G---AT-AA-C--AC--T-T-G-G-A-A-A-----…
>H97X84I02GWB75
A-A-C-G-A--A-C-G-C--T-G-G-C-G-G--C-A-G-G--C---T-T--AA-C--AC-A-T-G--C-A-A-G--T-C--GA-A-CG-A---------G-A--------------------------------------------------C-C------------------------TTC-G------------------------------G--G------------------------------------------TC--T-------AG-T-G-G-C-AC-A--C--G-GG-T-G-C-G-T-A--AC-G-C-G-T-G-GG---A-A-T-CT-G-C-C-CTT--GG-G-T-T-C--G-G-A---GT-AA-C--TC--G-C-C-G-A-A-A-----…
>H97X84I02GSYEU
G-A-T-G-A--A-C-G-C--T-A-G-C-G-G--C-A-G-G--C---T-T--AA-T--AC-A-T-G--C-A-A-G--T-C--GT-G-GG-----------G-CAG--C-A--T-------------------------------G--A---G-T-A------------------------GCA-A------------------------------T--A------C-T--T------------------G-A-T----G--GC--G-------AC-C-G-G-C-AA-A--C--G-GG-T-G-C-G-G-A--AC-A-C-G-T-A-CA---CAA-C-CT-T-C-C-TAC--AA-G-T-G-G--G-G-A---AT-AG-C--CC--A-G-A-G-A-A-A-----…
>H97X84I02GPLRG
A-A-T-G-A--A-C-G-C--T-G-G-C-G-G--C-A-T-G--C---C-T--AA-C--AC-G-T-G--C-A-A-G--T-C--GA-A-CG-A---------G-A--------------------------------------------------C-C------------------------TTC-G------------------------------G--G------------------------------------------TC--T-------AG-T-G-G-C-GC-A--C--G-GG-T-G-C-G-T-A--AC-G-C-G-T-G-GG---A-A-T-CT-G-C-C-CTT--GG-G-T-T-C--G-G-A---AT-AA-C--TC--G-C-C-G-A-A-A-----…
>H97X84I02GPE1N
A-T-T-G-A--A-C-G-C--T-A-G-C-G-G--G-A-T-G--C---T-T--TA-C--AC-A-T-G--C-A-A-G--T-C--GA-A-CG-----------G-CAG--C-G--C------------------------------------G-G-A-C------------------------TTC-G------------------------------G--T--C-T-------------------------G-G-C----G--GC--G-------AG-T-G-G-C-GA-A--C--G-GG-T-G-A-G-T-A--AT-G-T-A-T-C-GG---A-A-C-GT-G-C-C-CAG--TA-G-C-G-G--G-G-G---AT-AA-C--TA--C-G-C-G-A-A-A-----…
>H97X84I02GP3J6
A-T-T-G-A--A-C-G-C--T-G-G-C-G-G--C-A-G-G--C---T-T--AA-C--AC-A-T-G--C-A-A-G--T-C--GA-G-CG-G---------G-C------------------------------------------------A-T-A------------------------GCA-A------------------------------T--A--T---------------------------------------GT--C-------AG-C-G-G-C-AG-A--C--G-GG-T-G-A-G-T-A--AC-G-C-G-T-G-GG---A-A-C-GT-A-C-C-TTT--TG-G-T-T-T--G-G-A---AC-AA-C--AC--A-G-G-G-A-A-A-----…
>H97X84I02GLNVP
T---T-G-A--A-C-G-C--T-G-G-C-G-G--C-A-T-G--C---C-T--TA-C--AC-A-T-G--C-A-A-G--T-C--GA-A-CG-----------G-TAA--C-A--G--------------------------------------G-T-C------------------------TTC-G------------------------------G--A--T---------------------------G-C-T----G--AC--G-------AG-T-G-G-C-GA-A--C--G-GG-T-G-A-G-T-A--AT-A-C-A-T-C-GG---A-A-C-GT-G-C-C-CGA--TC-G-T-G-G--G-G-G---AT-AA-C--GA--G-G-C-G-A-A-A-----…
>H97X84I02GKXNF
A-A-C-G-A--A-C-G-C--T-G-G-C-G-G--C-A-T-G--C---C-T--AA-C--AC-A-T-G--C-A-A-G--T-C--GA-A-CG-----------G-T--------------------------------------------------C-C------------------------TTC-G------------------------------G---------------------------------------------GA--T-------AG-T-G-G-C-GG-A--C--G-GG-T-G-A-G-T-A--AC-A-C-G-T-G-GG---A-A-C-GT-A-C-C-CTT--AG-G-T-T-C--G-G-A---AC-AA-C--AC--A-G-G-G-A-A-A-----…
>H97X84I02GHT1K
A-A-C-G-A--A-C-G-C--T-G-G-C-G-G--C-G-T-G--C---T-T--AA-C--AC-A-T-G--C-A-A-G--T-C--GC-G-TG-C---------G-C----A-G--T----------------T--------------CG-C---G-T-A------------------------GCA-A------------------------------T--A--C---G-T--GG-------------------A-T----G-GGC--G-------CA-C-G-G-C-GC-A--C--G-GG-T-G-C-G-T-A--AC-A-C-G-T-G-GG---CAA-T-CT-G-C-C-CTC--CG-A-T-G-G--G-G-A---AT-AA-C--CC--C-G-C-G-A-A-A-----…
>H97X84I02GHS1P
A-A-C-G-A--A-C-G-C--T-G-G-C-G-G--C-A-T-G--C---C-T--AA-C--AC-A-T-A--C-A-A-G--T-C--GA-A-CG-A---------G-A--------------------------------------------------C-C------------------------TTC-G------------------------------G--G------------------------------------------TC--T-------AG-C-G-G-C-GC-A--C--G-GG-T-G-C-G-T-A--AC-G-C-G-T-G-GG---A-A-T-CT-G-C-C-CTT--GG-G-T-T-C--G-G-A---AT-AA-C--TC--A-C-C-G-A-A-A-----…
>H97X84I02GE3IZ
A-G-T-G-A--A-C-G-C--T-G-G-C-G-G--T-A-G-G--C---C-T--AA-C--AC-A-T-G--C-A-A-G--T-C--GA-A-CG-----------G-CAG--C-A--C----------------A--------------G--G-A-G-A-G------------------------CTT-G------------------------------C--T--C-T-C----TG-----------------G-G-T----G--GC--G-------AG-T-G-G-C-GG-A--C--G-GG-T-G-A-G-G-A--AT-A-C-A-T-C-GG---A-A-T-CT-A-C-T-CTG--TC-G-T-G-G--G-G-G---AT-AA-C--GT--A-G-G-G-A-A-A-----…
>H97X84I02GE1RE
A-G-C-G-A--A-C-G-C--T-G-G-C-G-G--C-A-T-G--C---C-T--TA-C--AC-A-T-G--C-A-A-G--T-C--GA-A-CG-----------G-TAA--C-A--G----------------------------------------G--------------------------TT--A---------------------------------A------------------------------G-C-T----G--AC--G-------AG-T-G-G-C-GA-A--C--G-GG-T-G-A-G-T-A--AT-A-T-A-T-C-GG---A-A-C-GC-G-C-C-CAG--TC-G-T-G-G--G-G-G---AT-AA-C--TG--C-T-C-G-A-A-A-----…
>H97X84I02G9X5W
A-A-C-G-A--A-C-G-C--T-G-G-C-G-G--C-A-G-G--C---T-T--AA-T--AC-A-T-G--C-A-A-G--T-C--GA-G-GG-----------G-CAT--C-A--G-------------------------------C--T-T-A-T-A------------------------GCA-A------------------------------T--A--T-A-G----G------------------G-C-T----G--GC--G-------AC-C-G-G-C-AA-A--C--G-GG-T-G-C-G-G-A--AC-A-C-G-T-A-CA---CAA-C-CT-T-C-C-TTT--AA-G-A-G-G--G-G-G---AT-AG-C--CC--A-T-A-G-A-A-A-----…
>H97X84I02G8DAP
G-A-C-G-A--A-C-G-C--T-G-G-C-G-G--C-A-T-G--C---C-T--AA-T--AC-A-T-G--C-A-A-G--T-C--GA-A-CG-C---------T-G----A-A--G-------------------------------CA-C-T-C-T-G------------------------CTT-G------------------------------C--A--G-A-G-T--G--------------------T-G----G--AT--G-------AG-T-G-G-C-GA-A--C--G-GG-T-G-A-G-T-A--AC-A-C-G-T-G-GG---GAA-T-CT-G-C-C-TAG--GA-G-T-G-G--G-G-G---AT-AA-C--AT--T-C-G-G-A-A-A-----…
>H97X84I02G6DV0
A-T-T-G-A--A-C-G-C--T-A-G-C-G-G--G-A-T-G--C---T-T--TA-C--AC-A-T-G--C-A-A-G--T-C--GA-A-CG-----------G-CAG--C-G--C----------------G---------------G-------A--------------------------CTT--------------------------------C-----G-G-T-C---T-----------------G-G-C----G--GC--G-------AG-T-G-G-C-GA-A--C--G-GG-T-G-A-G-T-A--AT-G-T-A-T-C-GG---A-A-C-GT-G-C-C-CAG--TA-G-C-G-G--G-G-G---AT-AA-C--TA--C-G-C-G-A-A-A-----…
>H97X84I02G391P
G-A-T-G-A--A-C-G-C--T-A-G-C-G-G--C-A-G-G--C---T-T--AA-C--AC-A-T-G--C-A-A-G--T-C--GA-G-GG-----------G-TA---GAA--G--------------------------------------C-AGC------------------------TTGCT------------------------------G-----C-----------------------------T-T----T--GA--G-------AC-C-G-G-C-GC-A--C--G-GG-T-G-C-G-T-A--AC-G-C-G-T-A-TG---CAA-T-CT-A-C-C-TTT--TA-C-A-G-A--G-G-G---AT-AG-C--CC--A-G-A-G-A-A-A-----…
>H97X84I02G07QA
A-T-T-G-A--A-C-G-C--T-A-G-C-G-G--G-A-T-G--C---T-T--TA-C--AC-A-T-G--C-A-A-G--T-C--GA-A-CG-----------G-CAG--C-G--C----------------G---------------G-------A--------------------------CTT--------------------------------C-----G-G-T-C---T-----------------G-G-C----G--GC--G-------AG-T-G-G-C-GA-A--C--G-GG-T-G-A-G-T-A--AT-G-T-A-T-C-GG---A-A-C-GT-G-C-C-CAG--TA-G-C-G-G--G-G-G---AT-AA-C--TA--C-G-C-G-A-A-A-----…
>H97X84I02G026Q
G-A-T-G-A--A-C-G-C--T-A-G-C-G-G--C-A-G-G--C---T-T--AA-T--AC-A-T-G--C-A-A-G--T-C--GT-G-GG-----------G-CAG--C-G--C--------------------------------A-G-T-G-T-A------------------------GCA-A------------------------------T--A--C-A-T-G---------------------G-G-C----G--GC--G-------AC-C-G-G-C-AA-A--C--G-GG-T-G-C-G-G-A--AC-A-C-G-T-A-CA---CAA-C-CT-T-C-C-TAC--AA-G-T-G-G--G-G-A---AT-AG-C--CC--A-G-A-G-A-A-A-----…
>H97X84I02FZKL3
A-A-C-G-A--A-C-G-C--T-G-G-C-G-G--C-A-T-G--C---C-T--AA-C--AC-A-T-G--C-A-A-G--T-C--GA-G-CG-C---------C-C----------------------------------------------------C------------------------GCA-A------------------------------G---------------------------------------------GG--G-------AG-C-G-G-C-AG-A--C--G-GG-T-G-A-G-T-A--AC-G-C-G-T-G-GG---A-A-T-CT-A-C-C-CAT--CA-C-T-A-C--G-G-A---AT-AA-C--TC--C-G-G-G-A-A-A-----…
>H97X84I02FXXUV
A-A-C-G-A--A-C-G-C--T-G-G-C-G-G--C-A-T-G--C---C-T--AA-C--AC-A-T-G--C-A-A-G--T-C--GA-G-CG-C---------C-C----------------------------------------------------C------------------------GCA-A------------------------------G---------------------------------------------GG--G-------AG-C-G-G-C-AG-A--C--G-GG-T-G-A-G-T-A--AC-G-C-G-T-G-GG---A-A-T-CT-A-C-C-CAT--CA-C-T-A-C--G-G-A---AC-AA-C--TC--C-G-G-G-A-A-A-----…
>H97X84I02FXCYB
A-A-C-G-A--A-C-G-C--T-G-G-C-G-G--C-A-T-G--C---C-T--AA-C--AC-A-T-G--C-A-A-G--T-C--GA-G-CG-G---------G-C------------------------------------------------G-T-A------------------------GCA-A------------------------------T--A--C---------------------------------------GT--C-------AG-C-G-G-C-AG-A--C--G-GG-T-G-A-G-T-A--AC-G-C-G-T-G-GG---A-A-C-GT-A-C-C-TTT--TG-G-T-T-C--G-G-A---AC-AA-C--AC--A-G-G-G-A-A-A-----…
>H97X84I02FWUK8
G-A-T-G-A--A-C-G-C--T-A-G-C-G-G--C-A-G-G--C---T-T--AA-T--AC-A-T-G--C-A-A-G--T-C--GA-A-CG-A---------G-A--------------------------------------------------C-C------------------------TTC-G------------------------------G--G------------------------------------------TC--T-------AG-T-G-G-C-GC-A--C--G-GG-T-G-C-G-T-A--AC-G-C-G-T-G-GG---A-A-T-CT-G-C-C-CTT--GG-G-T-T-C--G-G-A---AT-AA-C--TC--G-C-C-G-A-A-A-----…
>H97X84I02FW6EY
G-A-C-G-A--A-C-G-C--T-G-G-C-G-G--C-G-T-G--C---C-T--AA-T--AC-A-T-G--C-A-A-G--T-C--GA-G-CG-A---------A-C------A--G-------------------------------ATAA-G-G-A-G------------------------CTT-G------------------------------C--T--C-C-T-T--T--------------------G-A----C--GT--T-------AG-C-G-G-C-GG-A--C--G-GG-T-G-A-G-T-A--AC-A-C-G-T-G-GG---CAA-C-CT-G-C-C-CTA--TA-G-T-T-G--G-G-G---AT-AA-C--TC--C-G-G-G-A-A-A-----…
>H97X84I02FKKGA
A-A-C-G-A--A-C-G-C--T-G-G-C-G-G--C-A-T-G--C---C-T--AA-C--AC-A-T-G--C-A-A-G--C-C-GAACG-AGAC---------CTT----------------------------------------------------C------------------------GGG-T------------------------------C---------------------------------------------T-----------AG-T-G-G-C-GC-A--C--G-GG-T-G-A-G-T-A--AC-G-C-G-T-G-GG---A-A-T-CT-A-C-C-CAT--CA-C-T-A-C--G-G-A---AC-AA-C--TC--C-G-G-G-A-A-A-----…
>H97X84I02FJKV8
T---T-G-A--A-C-G-C--T-G-G-C-G-G--C-A-T-G--C---C-T--TA-C--AC-A-T-G--C-A-A-G--T-C--GA-A-CG-----------A-TAA--C-A--G--------------------------------------G-T-C------------------------TTC-G------------------------------G--A--T---------------------------G-C-T----G--AC--G-------AG-T-G-G-C-GA-A--C--G-GG-T-G-A-G-T-A--AT-A-C-A-T-C-GG---A-A-C-GT-G-C-C-CGA--TC-G-T-G-G--G-G-G---AT-AA-C--GA--G-G-C-G-A-A-A-----…
>H97X84I01DGFDJ
A-A-C-G-A--A-C-G-C--T-G-G-C-G-G--C-A-T-G--C---C-T--AA-C--AC-A-T-G--C-A-A-G--T-C--GA-A-C------------G---A--G-A--C----------------------------------------C--------------------------TT------------------------------------C------------------------------G---G----G--TC--T-------AG-T-G-G-C-GC-A--C--G-GG-T-G-A-G-T-A--AT-A-T-A-T-C-GG---A-A-C-GT-G-C-C-CAG--TC-G-T-G-G--G-G-G---AT-AA-C--TG--C-T-C-G-A-A-A-----…
>H97X84I02F8LGT
A-A-C-G-A--A-C-G-C--T-G-G-C-G-G--C-A-G-G--C---T-T--AA-C--AC-A-T-G--C-A-A-G--T-C--GA-G-CG-C---------C-C----------------------------------------------------C------------------------GCA-A------------------------------G---------------------------------------------GG--G-------AG-C-G-G-C-AG-A--C--G-GG-T-G-G-G-T-A--AC-G-C-G-T-G-GG---A-A-T-CT-A-C-C-CAT--CA-C-T-A-C--G-G-A---AC-AA-C--TC--C-G-G-G-A-A-A-----…
>H97X84I02F6OSK
A-A-C-G-A--A-C-G-C--T-G-G-C-G-G--C-G-T-G--C---T-T--AA-C--AC-A-T-G--C-A-A-G--T-C--GA-A-CG-----------G-AA---A-G--G--------------------------------C-C-C-T-G-C------------------------TTT-T------------------------------G--T--G-G-G-G-----------------------T-G----C--TC--G-------AG-T-G-G-C-GA-A--C--G-GG-T-G-A-G-T-A--AC-A-C-G-T-G-AG---TAA-C-CT-G-C-C-CTT--GA-C-T-T-T--G-G-G---AT-AA-C--TT--C-A-G-G-A-A-A-----…
>H97X84I02F3U82
A-A-C-G-A--A-C-G-C--T-G-G-C-G-G--C-A-T-G--C---C-T--TA-C--AC-A-T-G--C-A-A-G--T-C--GA-A-CG-----------G-TAA--C-A--G--------------------------------------G-T-C------------------------TTC-G------------------------------G--A--T---------------------------G-T-T----G--AC--G-------AG-T-G-G-C-GA-A--C--G-GG-T-G-A-G-T-A--AT-A-C-A-T-C-GG---A-A-C-GT-G-C-C-CGA--TC-G-T-G-G--G-G-G---AT-AA-C--GA--G-G-C-G-A-G-A-----…
>H97X84I02F1QXU
A-A-C-G-A--A-C-G-C--T-G-G-C-G-G--C-A-G-G--C---T-T--AA-C--AC-A-T-G--C-A-A-G--T-C--GA-G-CG-C---------C-C----------------------------------------------------C------------------------GCA-A------------------------------G---------------------------------------------GG--G-------AG-C-G-G-C-AG-A--C--G-GG-T-G-A-G-T-A--AC-G-C-G-T-G-GG---A-A-T-CT-A-C-C-CAT--CA-C-T-A-C--G-G-A---AC-AA-C--TC--C-G-G-G-A-A-A-----…
>H97X84I02FSPLN
G-A-T-G-A--A-C-G-C--T-A-G-C-T-A--C-A-G-G--C---T-T--AA-C--AC-A-T-G--C-A-A-G--T-C--GA-G-GG-----------G-CAG--C-A--T--------------G----------------GC-C-T-A-T-C------------------------TTTCGG-----------------------------G--A--T-G-G-G--C-C----------------G-A-T----G--GC--G-------AC-C-G-G-C-GC-A--C--G-GG-T-G-A-G-T-A--AC-G-C-G-T-A-TC---CAA-C-CT-T-C-C-CTT--TA-C-T-G-G--G-G-T---CC-AG-C--CC--G-T-C-G-A-A-A-----…
>H97X84I02FIVOI
A-T-T-G-A--A-C-G-C--T-G-G-C-G-G--C-A-T-G--C---C-T--TA-C--AC-A-T-G--C-A-A-G--T-C--GA-A-CG-----------G-TAA--C-A--G--------------------------------------G-T-C------------------------TTC-G------------------------------G--A--T---------------------------G-C-T----G--AC--G-------AG-T-G-G-C-GA-A--C--G-GG-T-G-A-G-T-A--AT-A-C-A-T-C-GG---A-A-C-GT-G-C-C-CGA--TC-G-T-G-G--G-G-G---AT-AA-C--GA--A-G-C-G-A-A-A-----…
>H97X84I02HVCDD
G-A-T-G-A--A-C-G-C--T-A-G-C-G-A--C-A-G-G--C---T-T--AA-C--AC-A-T-G--C-A-A-G--T-C--GA-G-GG-----------G-CAG--C-G--G----------------G--------------GG-A-G-T-A--------------------------GCA-A---------------------------------T--A-C-T-C--CC-----------------G-C-C----G--GC--G-------AC-C-G-G-C-GC-A--C--G-GG-T-G-A-G-T-A--AC-A-C-G-T-A-TG---AAA-C-CT-G-C-C-CGT--AG-C-A-G-G--G-G-G---AT-AA-G--CG--G-A-A-G-A-A-A-----…
>H97X84I02GCMRA
G-A-C-G-A--A-C-G-C--T-G-G-C-G-G--C-G-T-G--C---C-T--AA-T--AC-A-T-G--C-A-A-G--T-C--GA-A-CG-A---------A-CC---G-C--A-------------------------------AC-T-T-G-A-A------------------------CTT-G---------------------------------T--T-C-T-CG-T------------------T-A-A----G--GT--T-------AG-T-G-G-C-GC-A--C--G-GG-T-G-A-G-T-A--AC-A-C-G-T-G-GG---GAA-C-CT-G-C-C-CTT--TA-G-T-G-G--G-G-G---AT-AA-C--AG--T-C-G-G-A-A-A-----…
>H97X84I02JGR0J
G-A-T-G-A--A-C-G-C--T-A-G-C-G-G--G-A-G-G--C---C-T--AA-C--AC-A-T-G--C-A-A-G--C-C--GA-G-CG-----------G-TA---G-A--G------------------------------------A-T-C-T------------------------TTC-G------------------------------G--G--A-T---------------------------C-T----T--GA--G-------AG-C-G-G-C-GT-A--C--G-GG-T-G-C-G-G-A--AC-A-C-G-T-G-TG---CAA-C-CT-G-C-C-TTT--AT-C-T-G-G--G-G-G---AT-AG-C--CT--T-T-C-G-A-A-A-----…
>H97X84I02H63YD
A-T-T-G-A--A-C-G-C--T-G-G-C-G-G--C-A-T-G--C---C-T--TA-C--AC-A-T-G--C-A-A-G--T-C--GA-A-CG-----------G-TAA--C-A--G----------------------------------------G--------------------------TT--A---------------------------------A------------------------------G-C-T----G--AC--G-------AG-T-G-G-C-GA-A--C--G-GG-T-G-A-G-T-A--AT-G-T-A-T-C-GG---A-A-C-GT-G-C-C-CAG--TC-G-T-G-G--G-G-G---AT-AA-C--TG--C-T-C-G-A-A-A-----…
>H97X84I02FI4NJ
G-A-T-G-A--A-C-G-C--T-G-G-C-G-G--C-G-T-G--C---T-T--AA-C--AC-A-T-G--C-A-A-G--T-C--GA-A-CG-----------G-AA---A-G--G--------------------------------C-C-A-G-T-G------------------------CTT-G------------------------------C--A--C-T-G-G-----------------------T-A----C--TC--G-------AG-T-G-G-C-GA-A--C--G-GG-T-G-A-G-T-A--AC-A-C-G-T-G-GG---TGA-T-CT-G-C-C-CTG--CA-C-T-T-C--G-G-G---AT-AA-G--CC--T-G-G-G-A-A-A-----…
>H97X84I02I5FOX
G-A-C-G-A--A-C-G-C--T-G-G-C-G-G--C-A-T-G--C---C-T--AA-T--AC-A-T-G--C-A-A-G--T-C--GA-G-CG-A---------A-C----A-G--A--------------------------------CGA-G-G-A-G------------------------CTT-G------------------------------C--T--C-CTC-T-----------------------G-A----C--GT--T-------AG-C-G-G-C-GA-A--T--G-GG-T-G-A-G-T-A--AC-A-C-G-T-G-GG---CAA-C-CT-G-C-C-CTG--TA-G-T-T-G--G-G-G---AT-AA-C--TC--C-G-G-G-A-A-A-----…
>H97X84I02GNYBO
G-A-C-G-A--A-C-G-C--T-G-G-C-G-G--C-G-T-G--C---C-T--AA-T--AC-A-T-G--C-A-A-G--T-C--GA-G-CG-A---------A-C----C-A--A-------------------------------TA-A-G-A-A-G------------------------CTT-G------------------------------C--T--T-T-T-T--G--------------------T-T----G--GT--T-------AG-C-G-G-C-GG-A--C--G-GG-T-G-A-G-T-A--AC-A-C-G-T-G-GG---TAA-C-CT-G-C-C-TGT--AA-G-A-C-C--G-G-G---AT-AA-C--TC--C-G-G-G-A-A-A-----…
>H97X84I02G4JLE
A-T-T-G-A--A-C-G-C--T-G-G-C-G-G--C-A-T-G--C---C-T--TA-C--AC-A-T-G--C-A-A-G--T-C--GA-A-CG-----------G-TAA--C-A--G--------------------------------------G-T-CT-----------------------TTC-G----------------G-------------G--A--T---------------------------G-C-T----G--AC--G-------AG-T-G-G-C-GA-A--C--G-GG-T-G-A-G-T-A--AC-A-C-A-T-C-GG---A-A-C-GT-G-C-C-TAG--TA-G-T-G-G--G-G-G---AT-AA-C--TA--C-T-C-G-A-A-A-----…
>H97X84I02J6GZQ
A-T-T-G-A--A-C-G-C--T-G-G-C-G-G--C-A-T-G--C---C-T--TA-C--AC-A-T-G--C-A-A-G--T-C--GA-A-CG-----------G-CAG--C-G--C------------------------------------G-G-G-A------------------------GCA-A------------------------------T--C--C-T-------------------------G-G-C----G--GC--G-------AG-T-G-G-C-GA-A--C--G-GG-T-G-A-G-T-A--AT-A-T-A-T-C-GG---A-A-C-GT-G-C-C-CAG--TA-G-T-G-G--G-G-G---AT-AG-C--CC--G-G-C-G-A-A-A-----…
>H97X84I02IEJTC
G-A-C-G-A--A-C-G-C--T-G-G-C-G-G--C-A-T-G--C---C-T--AA-T--AC-A-T-G--C-A-A-G--T-C--GA-G-CG-A---------A-C----A-G--A-------------------------------CG-A-G-G-A-G------------------------CTT-G------------------------------C--T--C-C-T-C--T--------------------G-A----C--GT--T-------AG-C-G-G-C-GA-A--T--G-GG-T-G-A-G-T-A--AC-A-C-G-T-G-GG---CAA-C-CT-G-C-C-CTG--TA-G-T-T-G--G-G-G---AT-AA-C--TC--C-G-G-G-A-A-A-----…
>H97X84I02FPXAT
G-A-T-G-A--A-C-G-C--T-A-G-C-G-G--G-A-G-G--C---C-T--AA-C--AC-A-T-G--C-A-A-G--C-C--GA-G-CG-G---------T-A----T-T--T------------------------------------G-T-T-C------------------------TTC-G------------------------------G--A--A-C---------------------------A-G----A--GA--G-------AG-C-G-G-C-GC-A--C--G-GG-T-G-C-G-G-A--AC-A-C-G-T-G-TG---CAA-C-CT-G-C-C-TTT--AT-C-T-G-G--G-G-G---AT-AG-C--CT--T-T-C-G-A-A-A-----…
>H97X84I02JFG3D
G-A-C-G-A--A-C-G-C--T-G-G-C-G-G--C-G-T-G--C---C-T--AA-T--AC-A-T-G--C-A-A-G--T-C--GA-A-CG-C---------T-T----T-T--T-----------CTTT-C--------------AC-C-G-G-A-G------------------------CTT-G------------------------------C--T--C-C-A-C--CGA--AAG-------------A-A----A--AA--G-------AG-T-G-G-C-GA-A--C--G-GG-T-G-A-G-T-A--AC-A-C-G-T-G-GG---TAA-C-CT-G-C-C-CAT--CA-G-A-A-G--G-G-G---AT-AA-C--AC--T-T-G-G-A-A-A-----…
>H97X84I02J15QK
A-T-T-G-A--A-C-G-C--T-G-G-C-G-G--C-A-T-G--C---T-T--TA-C--AC-A-T-G--C-A-A-G--T-C--GA-A-CG-----------G-TAA--C-A--G------------------------------------G-G-A-G------------------------CTT-G------------------------------C--T--C-C-------------------------G-C-T----G--AC--G-------AG-T-G-G-C-GA-A--C--G-GG-T-G-A-G-T-A--AT-G-C-A-T-C-GG---A-A-C-GT-G-C-C-GTG--TA-A-T-G-G--G-G-G---AT-AA-C--GT--A-G-C-G-A-A-A-----…
>H97X84I02IXD4Q
A-G-C-G-A--A-C-G-C--T-G-G-C-G-G--C-A-G-G--C---C-T--AA-C--AC-A-T-G--C-A-A-G--T-C--GA-A-CG-G---------A-C--------------------------------------------------C-C------------------------TTC-G------------------------------G--G------------------------------------------GT--T-------AG-T-G-G-C-GG-A--C--G-GG-T-G-A-G-T-A--AC-A-C-G-T-G-GG---A-A-C-GT-G-C-C-TTT--AG-G-T-T-C--G-G-A---AT-AG-C--TC--C-T-G-G-A-A-A-----…
>H97X84I02IGZ5B
G-A-T-G-A--A-C-G-C--T-A-G-C-G-G--G-A-G-G--C---C-T--AA-C--AC-A-T-G--C-A-A-G--C-C--GA-G-CG-G---------T-A----T-T--G------------------------------------T-T-T-C------------------------TTC-G------------------------------G--A--A-A---------------------------T-G----A--GA--G-------AG-C-G-G-C-GT-A--C--G-GG-T-G-C-G-G-A--AC-A-C-G-T-G-TG---CAA-C-CT-G-C-C-TTT--AT-C-T-G-G--G-G-G---AT-AG-C--CT--T-T-C-G-A-A-A-----…
>H97X84I02GS4EV
G-A-T-G-A--A-C-G-C--T-A-G-C-G-G--C-A-G-G--C---T-T--AA-C--AC-A-T-G--C-A-A-G--T-C--GC-G-GG-----------G-CAG--C-G--G----------------G--------------GGAT-G-A----G-----------------------CTT-G----------------CT------------C--A--T-C---C--C------------------G-C-C----G--GC--G-------AC-C-G-G-C-GC-A--C--G-GG-T-G-A-G-T-A--AC-A-C-G-T-A-TG---CAA-C-CT-G-C-C-CCT--GT-C-A-G-G--G-G-G---AC-AA-C--CC--A-C-C-G-A-A-A-----…
>H97X84I02IQBFI
A-G-C-G-A--A-C-G-C--T-G-G-C-G-G--C-A-G-G--C---T-T--AA-C--AC-A-T-G--C-A-A-G--T-C--GA-G-CG-G---------G-C------------------------------------------------G-T-A------------------------GCA-A------------------------------T--A--C---------------------------------------GT--C-------AG-C-G-G-C-AG-A--C--G-GG-T-G-A-G-T-A--AC-G-C-G-T-G-GG---A-A-C-AT-A-C-C-TTT--TG-G-T-T-C--G-G-A---AC-AA-C--AC--A-G-G-G-A-A-A-----…
>H97X84I02HL3M3
G-A-T-G-A--A-C-G-C--T-A-G-C-G-A--C-A-G-G--C---T-T--AA-C--AC-A-T-G--C-A-A-G--T-C--GA-G-GG-----------G-CAG--C-G--G----------------G--------------GG-T-G-A-G-AG-----------------------CTT-G----------------C-------------T--C--T-C-A-C--CT-----------------G-C-C----G--GC--G-------AC-C-G-G-C-GC-A--C--G-GG-T-G-A-G-T-A--AC-A-C-G-T-A-TG---CAA-C-CT-G-C-C-TGT--CA-C-T-G-G--G-G-G---AT-AA-G--CG--G-A-A-G-A-A-A-----…
>H97X84I02GTTTH
G-A-T-G-A--A-C-G-C--T-A-G-C-T-A--C-A-G-G--C---T-T--AA-C--AC-A-T-G--C-A-A-G--T-C--GA-G-GG-----------G-CAG--C-A--T----------------G--------------GC-C-T-A-T-C------------------------TTTCGG-----------------------------G--A--T-G-G-G--CC-----------------G-A-T----G--GC--G-------AC-C-G-G-C-GC-A--C--G-GG-T-G-A-G-T-A--AC-G-C-G-T-A-TC---CAA-C-CT-T-C-C-CTT---T-A-C---T--G-G-G---GTCCAGC--CC--G-T-C-G-A-A-A-----…
>H97X84I02JHME3
A-A-C-G-A--A-C-G-C--T-G-G-C-G-G--C-A-T-G--C---C-T--TA-C--AC-A-T-G--C-A-A-G--T-C--GA-A-CG-----------G-TAA--C-A--G--------------------------------------G-T-C------------------------TTC-G------------------------------G--A--T---------------------------G-C-T----G--AC--G-------AG-T-G-G-C-GA-A--C--G-GG-T-G-A-G-T-A--AT-A-C-A-T-C-GG---A-A-C-GT-G-C-C-CGA--TC-G-T-G-G--G-G-G---AT-AA-C--GA--A-G-C-G-A-A-A-----…
>H97X84I02HMX4U
A-T-T-G-A--A-C-G-C--T-G-G-C-G-G--C-A-G-G--C---T-T--AA-C--AC-A-T-G--C-A-A-G--T-C--GA-G-CG-G---------G-G----T-G--A----------------------------------G-G-T-G-C------------------------TTC-G------------------------------G--T--A-C-T-------------------------G-A----T--CC--T-------AG-C-G-G-C-GG-A--C--G-GG-T-G-A-G-T-A--AT-G-C-T-T-A-GG---A-A-T-CT-G-C-C-ATT--TA-G-T-G-G--G-G-G---AC-AA-C--AT--T-C-C-G-A-A-A-----…
>H97X84I02GSJ5F
G-A-T-G-A--A-C-G-C--T-A-G-C-T-A--C-A-G-G--C---T-T--AA-C--AC-A-T-G--C-A-A-G--T-C--GA-G-GG-----------G-CAG--C-A--T----------------G--------------GC-C-T-A-T-C------------------------TTTCGG-----------------------------G--A--T-G-G-G--CC-----------------G-A-T----G--GC--G-------AC-C-G-G-C-GC-A--C--G-GG-T-G-A-G-T-A--AC-G-C-G-T-A-TC---CAA-C-CT-T-C-C-CTT--TA-C-T-G-G--G-G-T---CC-AG-C--CC--G-T-C-G-A-A-A-----…
>H97X84I02GJWSV
G-A-T-G-A--A-C-G-C--T-G-G-C-G-G--C-G-T-G--C---C-T--AA-C--AC-A-T-G--C-A-A-G--T-C--GA-G-CG-A---------T-T------------------------------------------------T-A-C------------------------TTC-G------------------------------G--T--A---------------------------------------AA--G-------AG-C-G-G-C-GG-A--C--G-GG-T-G-A-G-T-A--AC-G-C-G-T-G-GG---TAA-C-CT-G-C-C-CTG--TA-C-A-C-A--C-G-G---AT-AA-C--AT--A-C-C-G-A-A-A-----…
>H97X84I02GIBXP
G-AGC-G-A--A-C-G-C--T-A-G-C-G-G--G-A-G-G--C---C-T--AA-C--AC-A-T-G--C-A-A-G--C-C--GA-G-CG-G---------T-A----T-T--G------------------------------------T-T-T-C------------------------TTC-G------------------------------G--A--A-A---------------------------T-G----A--GA--G-------AG-C-G-G-C-GT-A--C--G-GG-T-G-C-G-G-A--AC-A-C-G-T-G-TG---CGA-C-CT-G-C-C-TTT--AT-C-T-G-G--G-G-G---AT-AG-C--CT--T-T-C-G-A-A-A-----…
>H97X84I02HSRE5
G-A-T-G-A--A-C-G-C--T-A-G-C-G-G--G-A-G-G--C---C-T--AA-C--AC-A-T-G--C-A-A-G--C-C--GA-G-CG-G---------T-A----G-A--G------------------------------------A-T-C-T------------------------TTC-G------------------------------G--G--A-T---------------------------C-T----T--GA--G-------AG-C-G-G-C-GT-A--C--G-GG-T-G-C-G-G-A--AC-A-C-G-T-G-TG---CAA-C-CT-G-C-C-TTT--AT-C-T-G-G--G-G-G---AT-AG-C--CT--T-T-C-G-A-A-A-----…
>H97X84I02JOINS
A-T-T-G-A--A-C-G-C--T-G-G-C-G-G--C-A-T-G--C---C-T--TA-C--AC-A-T-G--C-A-A-G--T-C--GA-A-CG-----------G-TAA--C-A--G--------------------------------------G-T-C------------------------TTC-G------------------------------G--A--T---------------------------G-C-T----G--AC--G-------AG-T-G-G-C-GA-A--C--G-GG-T-G-A-G-T-A--AT-A-C-A-T-C-GG---A-A-C-GT-G-C-C-CGA--TC-G-T-G-G--G-G-G---AT-AA-C--GA--G-G-C-G-A-A-A-----…
>H97X84I02HRV88
A-T-T-G-A--A-C-G-C--T-G-G-C-G-G--C-A-T-G--C---C-T--TA-C--AC-A-T-G--C-A-A-G--T-C--GA-A-CG-----------G-TAA--C-A--G--------------------------------------G-T-C------------------------TTC-G------------------------------G--A--T---------------------------G-C-T----G--AC--G-------AG-T-G-G-C-GA-A--C--G-GG-T-G-A-G-T-A--AT-G-T-A-T-C-GG---A-A-C-GT-G-C-C-CAG--TC-G-T-G-G--G-G-G---AT-AA-C--TG--C-T-C-G-A-A-A-----…
>H97X84I02HG19Y
A-T-T-G-A--A-C-G-C--T-G-G-C-G-G--C-A-G-G--C---C-T--AA-C--AC-A-T-G--C-A-A-G--T-C--GA-G-CG-----------G-AT---G-A--G----------------------------------G-G-G-A-G------------------------CTT-G------------------------------C--T--C-C-T-------------------------T-G----A--TT--C-------AG-C-G-G-C-GG-A--C--G-GG-T-G-A-G-T-A--AT-G-C-C-T-A-GG---A-A-T-CT-G-C-C-TGG--TA-G-T-G-G--G-G-G---AT-AA-C--GT--T-C-C-G-A-A-A-----…
>H97X84I02HFFQ5
A-T-T-G-A--A-C-G-C--T-G-G-C-G-G--C-A-T-G--C---C-T--TA-C--AC-A-T-G--C-A-A-G--T-C--GA-A-CG-----------G-TAA--C-A--G--------------------------------------G-T-C------------------------TTC-G------------------------------G--A--C---------------------------G-C-T----G--AC--G-------AG-T-G-G-C-GA-A--C--G-GG-T-G-A-G-T-A--AT-A-C-A-T-C-GG---A-A-C-GT-G-C-C-CGA--TC-G-T-G-G--G-G-G---AT-AA-C--GA--G-G-C-G-A-A-A-----…
>H97X84I02GR74Y
A-T-T-G-A--A-C-G-C--T-G-G-C-G-G--C-A-T-G--C---C-T--TA-C--AC-A-T-G--C-A-A-G--T-C--GA-A-CG-----------G-TAA--C-A---------------------------------------G-G-T-C------------------------TTC-G------------------------------G-----A-T-------------------------G-C-T----G--AC--G-------AG-T-G-G-C-GA-A--C--G-GG-T-G-A-G-T-A--AT-G-T-A-T-C-GG---A-A-C-GT-A-C-C-TTT--CA-G-T-G-G--G-G-G---AT-AA-C--GT--A-G-C-G-A-A-A-----…
>H97X84I02IWX2T
A-A-C-G-A--A-C-G-C--T-G-G-C-G-G--C-A-T-G--C---C-T--AA-C--AC-A-T-G--C-A-A-G--T-C--GA-A-CG-----------A------G-A--C-------------------------------------------------------------------C----------------------------------------T---T-C--G------------------G-G-T----C---T----------AG-T-G-G-C-GC-A--C--G-GG-T-G-A-G-T-A--AC-A-C-G-T-G-GG---GAA-C-CT-G-C-C-CTT--TA-G-T-G-G--G-G-G---AT-AA-C--AG--T-C-G-G-A-A-A-----…
>H97X84I02FW84W
A-T-T-G-A--A-C-G-C--T-G-G-C-G-G--C-A-T-G--C---C-T--TA-C--AC-A-T-G--C-A-A-G--T-C--GA-A-CG-----------G--AT--T-G--A------------------------------------G-G-G-G------------------------CTT-G------------------------------C--T--C-C---------------------------T-C----A--GT--T-------AG-T-G-G-C-GA-A--C--G-GG-T-G-A-G-T-A--AT-G-C-A-T-C-GG---A-A-C-GT-G-C-C-CAG--TC-G-T-G-G--G-G-G---AT-AA-C--TA--C-T-C-G-A-A-A-----…
>H97X84I02FEIMH
A---C-G-A--A-C-G-C--T-G-G-C-G-G--C-A-T-G--C---C-T--AA-C--AC-A-T-G--C-A-A-G--T-C--GA-G-CG-G---------A-G----A-T--G----------------------------------A-G-G-T-G------------------------CTT-G------------------------------C--A--C-C-T-------------------------T-A----T--CT--T-------AG-C-G-G-C-GG-A--C--G-GG-T-G-A-G-T-A--AT-G-C-T-T-A-GG---A-A-T-CT-G-C-C-TAT--TA-G-T-G-G--G-G-G---AC-AA-C--AT--T-C-C-G-A-A-A-----…
>H97X84I02JGVO8
A-A---G-A--A-C-G-C--T-G-G-C-G-G--C-A-T-G--C---C-T--AA-C--AC-A-T-G--C-A-A-G--T-C--GA-A-CG-A---------G-A--------------------------------------------------C-C------------------------TTC-G------------------------------G--G------------------------------------------TC--T-------AG-T-G-G-C-GC-A--C--G-GG-T-G-C-G-T-A--AC-G-C-G-T-G-GG-----A-T-CT-G-C-C-CTT--GG-G-T-T-C--G-G-A---AT-AA-C--TC--G-C-C-G---A-A-----…
>H97X84I02HCEBU
A---T-G-A--A-C-G-C--T-A-G-C-G-G--G-A-G-G--C---C-T--AA-C--AC-A-T-G--C-A-A-G--C-C--GA-G-CG-----------G-CAG--C-A--C------------------------------------G-G-A-C------------------------TTC-G------------------------------G--T--C-T-------------------------G-G-T----G--GC--G-------AG-T-G-G-C-GA-A--C--G-GG-T-G-A-G-T-A--AT-A-C-A-T-C-GG---A-A-C-GTGC-C-C-GAT--C--G-T-G-G--G-G-G---AT-AA-C--GT--A-G-C-G-A-A-A-----…
>H97X84I02IY4ZJ
A-T-T-G-A--A-C-G-C--T-G-G-C-G-G--C-A-T-G--C---C-T--AA-C--AC-A-T-G--C-A-A-G--T-C--GA-A-CG-A---------G-A--------------------------------------------------C-C------------------------TTC-G------------------------------G--G------------------------------------------TC--T-------AG-T-G-G-C-GC-A--C--G-GG-T-G-C-A-T-A--GC-G-C-G-T-G-GG---A-A-T-CT-G-C-C-CTT--GG-G-T-T-C--G-G-A---AT-AA-C--TC--G-C-C-G-A-A-A-----…
>H97X84I02IPDLQ
A-G-C-G-A--A-C-G-C--T-G-G-C-G-G--C-A-T-G--C---C-T--CA-C--AC-A-T-G--C-A-A-G--T-C--GG-A-CG-A---------G-A--------------------------------------------------C-C------------------------TTC-G------------------------------G--G------------------------------------------TC--T-------AG-T-G-G-C-GC-A--C--G-GG-T-G-C-G-T-A--AC-G-C-G-T-G-GG---A-A-T-CT-G-C-C-CTT--GG-G-T-T-C--G-G-A---AT-GA-C--TC--G-C-C-G-A-A-A-----…
>H97X84I02IM9R2
G-A-T-G-A--A-C-G-C--T-A-G-C-G-G--G-A-G-G--C---C-T--AA-C--AC-A-T-G--C-A-T-G--C-C--GA-G-CG-G---------T-A----T-T--G------------------------------------T-T-T-C------------------------TTC-G------------------------------G--A--A-A---------------------------T-G----A--GA--G-------AG-C-G-G-C-GT-A--C--G-GG-T-G-C-G-G-A--AC-G-C-G-T-G-TG---CAA-C-CT-G-C-C-TTT--AT-C-T-G-G--G-G-G---AT-AG-C--CT--T-T-C-G-A-A-A-----…
>H97X84I02IFOWI
A-T-T-G-A--A-C-G-C--T-G-G-C-G-G--C-A-T-G--C---C-T--TA-C--AC-A-T-G--C-A-A-G--T-C--GA-A-CG-----------G-TAA--C-A--G----------------------------------------GTC------------------------TTCGGA--------------------------------T------------------------------G-C-T----G--AC--G-------AG-T-G-G-C-GA-A--C--G-GG-T-G-A-G-T-A--AT-G-T-A-T-C-GG---A-A-C-GT-G-C-C-CAG--TC-G-T-G-G--G-G-G---AT-AA-C--TG--C-T-C-G-A-A-A-----…
>H97X84I02IC94C
G-A-T-G-A--A-C-G-C--T-G-G-C-G-G--C-G-T-G--C---C-T--AA-C--AC-A-T-G--C-A-A-G--T-C--GA-A-CG-A---------G-A--------------------------------------------------C-C------------------------TTC-G------------------------------G--G------------------------------------------TC--T-------AG-T-G-G-C-GC-A--C--G-GG-T-G-C-G-T-A--AC-G-C-G-T-G-GG---A-A-T-CT-G-C-C-CTT--GG-G-T-T-C--G-G-A---AT-AA-C--TC--G-C-C-G-A-A-A-----…
>H97X84I02IAC6N
G-A-C-G-A--A-C-G-C--T-G-G-C-G-G--C-A-T-G--C---C-T--AA-T--AC-A-T-G--C-A-A-G--T-C--GA-G-CG-A---------A-C----A-G--A-------------------------------CG-A-G-G-A-G------------------------CTT-G------------------------------C--T--C-C-T-C--C--------------------G-A----C--GT--T-------AG-C-G-G-C-GA-A--T--G-GG-T-G-A-G-T-A--AC-A-C-G-T-G-GG---CAA-C-CT-G-C-C-CTG--TA-G-T-T-G--G-G-G---AT-AA-C--TC--C-G-G-G-A-A-A-----…
>H97X84I02JDPXS
G-A-C-G-A--A-C-G-C--T-G-G-C-G-G--C-A-T-G--C---C-T--AA-T--AC-A-T-G--C-A-A-G--T-C--GA-G-CG-A---------A-C----A-G--A-------------------------------CG-A-G-G-A-G------------------------CTT-G------------------------------C--T--C-C-T-C--T--------------------G-A----C--GT--T-------AG-C-G-G-C-GA-A--T--G-GG-T-G-A-G-T-A--AC-A-C-G-T-G-GG---GAA-C-CT-G-C-C-CTT--TA-G-T-G-G--G-G-G---AT-AA-CA-GT--C---G-G-A-A-A-----…
>H97X84I02HVLI9
G-A-T-G-A--A-C-G-C--T-A-G-C-T-A--C-A-G-G--C---T-T--AA-C--AC-A-T-G--C-A-A-G--T-C--GA-G-GG-----------G-CAG--C-A--T--------------G---------------GCC-T-A-T-C-T------------------------CTCGG------------------------------G--A--T-G-G-G--C-C----------------G-A-T----G--GC--G-------AC-C-G-G-C-GC-A--C--G-GG-T-G-A-G-T-A--AC-G-C-G-T-A-TC---CAA-C-CT-T-C-C-CTT--TA-C-T-G-G--G-G-T---CC-AG-C--CC--G-T-C-G-A-A-A-----…
>H97X84I02HLIZJ
G-A-T-G-A--A-C-G-C--T-A-G-C-T-A--C-A-G-G--C---T-T--AA-C--AC-A-T-G--C-A-A-G--T-C--GA-G-GG-----------G-CAG--C-A--T--------------G----------------GC-C-T-A-T-C------------------------TTTCGG-----------------------------G--A--T-G-G-G--C-C----------------G-A-T----G--GC--G-------AC-C-G-G-C-GC-A--C--G-GG-T-G-A-G-T-A--GC-G-C-G-T-A-TC---CAA-C-CT-T-C-C-CTT--TA-C-T-G-G--G-G-T---CC-AG-C--CC--G-T-C-G-A-A-A-----…
>H97X84I02HJQ83
A-T-T-G-A--A-C-G-C--T-G-G-C-G-G--C-A-T-G--C---C-T--TA-C--AC-A-T-G--C-A-A-G--T-C--GA-A-CG-----------G-CAG--C-A--C------------------------------------G-GAC-T------------------------TCG-G------------------------------T-----C-T-------------------------G-G-T----G--GC--G-------AG-T-G-G-C-GA-A--C--G-GG-T-G-A-G-T-A--AT-G-T-A-T-C-GG---A-A-C-GT-A-C-C-TTT--CA-G-T-G-G--G-G-G---AT-AA-C--GT--A-G-C-G-A-A-A-----…
>H97X84I02HCRIS
A-T-T-G-A--A-C-G-C--T-G-G-C-G-G--C-A-T-G--C---C-T--TA-C--AC-A-T-G--C-A-A-G--T-C--GA-A-CG-----------G-TAA--C-A--G--------------------------------------G-T-C------------------------TTC-G------------------------------G--A--T---------------------------G-C-T----G--AC--G-------AG-T-G-G-C-GA-A--C--G-GG-T-G-A-G-T-A--AT-A-C-A-T-C-GG---A-A-C-GT-G-C-C-CGA--TC-G-T-G-G--G-G-G---AT-AA-C--GA--A-G-C-G-A-A-A-----…
>H97X84I02H9KXJ
A-T-T-G-A--A-C-G-C--T-G-G-C-G-G--C-A-T-G--C---C-T--TA-C--AC-A-T-G--C-A-A-G--T-C--GA-A-CG-----------G-TAA--C-A--G--------------------------------------G-T-C------------------------TTC-G------------------------------G--A--T---------------------------G-C-T----G--AC--G-------AG-T-G-G-C-GA-A--C--G-GG-T-G-A-G-T-A--AT-G-C-A-T-C-GG---A-A-C-GT-G-C-C-CGA--TC-G-T-G-G--G-G-G---AT-AA-C--GA--A-G-C-G-A-A-A-----…
>H97X84I02GYPUC
A-T-T-G-A--A-C-G-C--T-G-G-C-G-G--C-A-T-G--C---C-T--TA-C--AC-A-T-G--C-A-A-G--T-C--GA-A-CG-----------G-TAA--C-A--G--------------------------------------G-T-C------------------------TTC-G------------------------------G--A--T---------------------------G-C-T----G--AC--G-------AG-T-G-G-C-GA-A--C--G-GG-T-G-A-G-T-A--AT-A-C-A-T-C-GG---A-A-C-GT-G-C-C-CGA--TC-G-T-G-G--G-G-G---AT-AA-C--GA--A-G-C-G-A-A-A-----…
>H97X84I02GXNSC
A-A-C-G-A--A-C-G-C--T-G-G-C-G-G--C-A-T-G--C---C-T--AG-C--AC-A-T-G--C-A-A-G--T-C--GA-A-CG-A---------G-A--------------------------------------------------C-C------------------------TTC-G------------------------------G--G------------------------------------------TC--T-------AG-T-G-G-C-GC-A--C--G-GG-T-G-C-G-T-A--AC-G-C-G-T-G-GG---A-A-T-CT-G-C-C-CTT--GG-G-T-T-C--G-G-A---AT-AA-C--TC--G-C-C-G-A-A-A-----…
>H97X84I02GQ7XN
A-A-C-G-A--A-C-G-C--T-G-G-C-G-G--C-A-T-G--C---C-T--TA-C--AC-A-T-G--C-A-A-G--T-C--GA-A-CG-----------G-TAA--C-A--G--------------------------------------G-T-C------------------------TTC-G------------------------------G--A--T---------------------------G-C-T----G--AC--G-------AG-T-G-G-C-GA-A--C--G-GG-T-G-A-G-T-A--AT-A-C-A-T-C-GG---A-A-C-GT-G-C-C-CGA--TC-G-T---G--G-G-G---AT-AA-C--GA--G-G-C-G-A-A-A-----…
>H97X84I02GKJSN
G-A-T-G-A--A-C-G-C--T-A-G-C-T-A--C-A-G-G--C---T-T--AA-C--AC-A-T-G--C-A-A-G--T-C--GA-G-GG-----------G-CAG--C-A--T--------------G----------------GC-C-T-A-T-C------------------------TTTCGG-----------------------------G--A--T-G-G-G--C-C----------------G-A-T----G--GC--G-------AC-C-G-G-C-GC-A--C--G-GG-T-G-A-G-T-A--AC-G-C-G-T-A-TC---CAA-C-CT-T-C-C-CTT--TA-C-T-G-G--G-G-T---CC-AG-C--CC--G-T-C-G-A-A-A-----…
>H97X84I02HROOA
A-T-T-G-A--A-C-G-C--T-G-G-C-G-G--C-A-T-G--C---T-T--TA-C--AC-A-T-G--C-A-A-G--T-C--GA-A-CG-----------G-TAA--C-AGGGA---------------------------------------GCT----------------------TGCT--C---------------------------------C------------------------------G-C-T----G--AC--G-------AG-T-G-G-C-GA-A--C--G-GG-T-G-A-G-T-A--AT-G-C-A-T-C-GG---A-A-C-GT-G-T-C-GTG--TA-A-T-G-G--G-G-G---AT-AA-C--GT--A-G-C-G-A-A-A-----…
>H97X84I02GB4BO
G-ATT-G-A--A-C-G-C--T-G-G-C-G-G--C-A-G-G--C---T-T--AA-C--AC-A-T-G--C-A-A-G--T-C--GA-G-CG-C---------G-A----G-A--T-------------------------------TG-A-G-G-A-G------------------------CTT-G------------------------------C--T--C-C-T-T--A--------------------A-T----C--TC--G-------AG-C-G-G-C-GG-A--C--G-GG-T-G-A-G-T-A--AC-A-C-G-T-A-GG---CAA-C-CT-A-C-C-CTT--GA-G-A-T-T--G-G-G---AT-AA-C--TA--C-C-G-G-A-A-A-----…
>H97X84I02G4HNT
G-A-T-G-A--A-C-G-C--T-A-G-C-G-G--C-A-G-G--C---T-T--AA-T--AC-A-T-G--C-A-A-G--T-C--GA-G-GG-----------G-CAG--C-A--T----------------G--------------GC-C-T-A-T-C------------------------TTTCGG-----------------------------G--A--T-G-G-G--CC-----------------G-A-T----G--GC--G-------AC-C-G-G-C-GC-A--C--G-GG-T-G-A-G-T-A--AC-G-C-G-T-A-TC---CAA-C-CT-T-C-C-CTT--TA-C-T-G-G--G-G-T---CC-AG-C--CC--G-T-C-G-A-A-A-----…
>H97X84I02HMIM8
A-T-T-G-A--A-C-G-C--T-G-G-C-G-G--C-A-T-G--C---C-T--TA-C--AC-A-T-G--C-A-A-G--T-C--GA-A-CG-----------G-TA-----A--C------------------------------------A-G-G-T------------------------CTT-C------------------------------G--G--A-T-------------------------G-C-T----G--AC--G-------AG-T-G-G-C-GA-A--C--G-GG-T-G-A-G-T-A--AT-A-C-A-T-C-GG---A-A-C-GT-G-C-C-CAG--TA-G-T-G-G--G-G-G---AT-AG-C--CC--G-G-C-G-A-A-A-----…
>H97X84I02FS8BZ
G-A-T-G-A--A-C-G-C--T-A-G-C-G-G--G-A-G-G--C---C-T--AA-C--AC-A-T-G--C-A-A-G--C-C--GA-G-CG-G---------T-A------G--A------------------------------------G-A-T-CT-----------------------TTC-G------------------------------G--G--A-T---------------------------C-C----T--GA--G-------AG-C-G-G-C-GT-A--C--G-GG-T-G-C-G-G-A--AC-A-C-G-T-G-TG---CAA-C-CT-G-C-C-TTT--AT-C-T-G-G--G-G-G---AT-AG-C--CT--T-T-C-G-A-A-A-----…
>H97X84I02IE6XN
G-A-C-G-A--A-C-G-C--T-G-G-C-G-G--C-G-T-G--C---C-T--AA-T--AC-A-T-G--C-A-A-GTCGAACGAA-C-CG-C---------A-A----C-T--T----------------------------------GAACT-T-G------------------------TTCTC------------------------------G--T--T-A---------------------------A-G-------GT--T-------AG-T-G-G-C-GC-A--C--G-GG-T-G-C-G-G-A--AC-A-C-G-T-G-TG---CAA-C-CT-G-C-C-TTT--AT-C-T-G-G--G-G-G---AT-AG-C--CT--T-T-C-G-A-A-A-----…
>H97X84I02H0BGP
G-A-C-G-A--A-C-G-C--T-G-G-C-G-G--C-A-T-G--C---C-T--AA-T--AC-A-T-G--C-A-A-G--T-C--GA-G-CGAA---------C-A----G----A-------------------------------CG-A-G-G-A-G------------------------CTT-G------------------------------C--T--C-C-T-C-----------------------T-G----A---C--GTT-----AG-C-G-G-C-GA-A--T--G-GG-T-G-A-G-T-A--AC-A-C-G-T-A-GG---CAA-C-CT-A-C-C-CTT--GA-G-A-T-T--G-G-G---AT-AA-C--TA--C-C-G-G-A-A-A-----…
>H97X84I02JY8QY
G-A-T-G-A--A-C-G-C--T-A-G-C-G-G--C-A-G-G--C---T-T--AA-T--AC-A-T-G--C-A-A-G--T-C--GT-G-GG-----------G-CAG--C-A--T-------------------------------G--A---G-T-A------------------------GCA-A------------------------------T--A------C-T--T------------------G-A-T----G--GC--G-------AC-C-G-G-C-AA-A--C--G-GG-T-G-C-G-G-A--AC-A-C-G-T-A-CA---CAA-C-CT-T-C-C-TAC--AA-G-T-G-G--G-G-A---AT-AG-C--CC--A-G-A-G-A-A-A-----…
>H97X84I02JXWU7
G-A-T-G-A--A-C-G-C--T-A-G-C-G-G--G-A-G-G--C---C-T--AA-C--AC-A-T-G--C-A-A-G--T-C--GA-G-GG-----------G-CAG--C-A--T----------------G--------------GC-C-T-A-T-C------------------------TTTCGG-----------------------------G--A--T-G-G-G--CC-----------------G-A-T----G--GC--G-------AC-C-G-G-C-GC-A--C--G-GG-T-G-A-G-T-A--AC-G-C-G-T-A-TC---CAA-C-CT-T-C-C-CTT--TA-C-T-G-G--G-G-T---CC-AG-C--CC--G-T-C-G-A-A-A-----…
>H97X84I02JUBQY
A-T-T-G-A--A-C-G-C--T-G-G-C-G-G--C-A-T-G--C---C-T--TA-C--GC-A-T-G--C-A-A-G--T-C--GA-A-CG-----------G-TAA--C-A--G--------------------------------------G-T-C------------------------TTC-G------------------------------G--A--T---------------------------G-C-T----G--AC--G-------AG-T-G-G-C-GA-A--C--G-GG-T-G-A-G-T-A--AT-A-C-A-T-C-GG---G-A-C-GT-G-C-C-CTA--TC-G-T-G-G--G-G-G---AT-AA-C--GA--A-G-C-G-A-A-A-----…
>H97X84I02JTXDF
G-A-T-G-A--A-C-G-C--T-A-G-C-G-G--C-A-G-G--C---T-T--AA-C--AC-A-T-G--C-A-A-G--T-C--GA-G-GG-----------G-CAG--C-A--T----------------G--------------GC-C-T-A-T-C------------------------TTTCGG-----------------------------G--A--T-G-G-G--CC-----------------G-A-T----G--GC--G-------AC-C-G-G-C-GC-A--C--G-GG-T-G-A-G-T-A--AC-G-C-G-T-A-TC---CAA-C-CT-T-C-C-CTT--TA-C-T-G-G--G-G-T---CC-AG-C--CC--A-T-C-G-A-A-A-----…
>H97X84I02JS47P
A-T-T-G-A--A-C-G-C--T-G-G-C-G-G--C-A-T-G--C---C-T--TA-C--AC-A-T-G--C-A-A-G--T-C--GA-A-CG-----------G-TAA--C-A--G--------------------------------------G-T-C------------------------TTC------------------G-------------G--A--T---------------------------G-C-T----G--AC--G-------AG-T-G-G-C-GA-A--C--G-GG-T-G-A-G-T-A--AC-A-C-A-T-C-GG---A-A-C-GT-G-C-C-TAG--TA-G-T-G-G--G-G-G---AT-AA-C--TA--C-T-C-G-G-A-A-----…
>H97X84I02JQV2U
G-A-C-G-A--A-C-G-C--T-G-G-C-G-G--C-G-T-G--C---C-T--AA-T--AC-A-T-G--C-A-A-G--T-C--GA-A-CG-A---------G-A--------------------------------------------------C-C------------------------TCC-G------------------------------G--G------------------------------------------TC--T-------AG-T-G-G-C-GC-A--C--G-GG-T-G-C-G-T-A--AC-G-C-G-T-G-GG---A-A-T-CT-G-C-C-CTT--GG-G-T-T-C--G-G-A---AT-AA-C--TC--G-C-C-G-A-A-A-----…
>H97X84I02JPPGT
A-T-T-G-A--A-C-G-C--T-G-G-C-G-G--C-A-T-G--C---C-T--TA-C--AC-A-T-G--C-G-A-G--T-C--GA-A-CG-----------G-TAA--C-A--G----------------------------------------G--------------------------TT--A---------------------------------A------------------------------G-C-T----G--AC--G-------AG-T-G-G-C-GA-A--C--G-GG-T-G-A-G-T-A--AT-G-T-A-T-C-GG---A-A-C-GT-G-C-C-CAG--TC-G-T-G-G--G-G-G---AT-AA-C--TG--C-T-C-G-A-A-A-----…
>H97X84I02JLIXA
A-T-T-G-A--A-C-G-C--T-G-G-C-G-G--C-A-T-G--C---C-T--TA-C--AC-A-T-G--C-A-A-G--T-C--GA-A-CG-----------G-TAA--C-A--G--------------------------------------G-T-C------------------------TTC-G------------------------------G--A--C---------------------------G-C-T----G--AC--G-------AG-T-G-G-C-GA-A--C--G-GG-T-G-A-G-T-A--AT-A-C-A-T-C-GG---A-A-C-GT-G-C-C-CGA--TC-G-T---G--G-G-G---AT-AA-C--GA--G-G-C-G---A-A-----…
>H97X84I02JLHWC
G-A-T-G-A--A-C-G-C--T-G-G-C-G-G--C-G-T-G--C---C-T--AA-T--AC-A-T-G--C-A-A-G--T-C--GA-G-CG-C---------G-A----G-A--T-------------------------------TG-A-G-G-G-G------------------------CTT-G------------------------------C--T--C-C-T-T--A--------------------A-T----C--TC--G-------AG-C-G-G-C-GG-A--C--G-GG-T-G-A-G-T-A--AC-A-C-G-T-A-GG---CAA-C-CT-A-C-C-CCT--GA-G-A-T-T--G-G-G---AT-AA-C--TA--C-C-G-G-A-A-A-----…
>H97X84I02JJ9YM
G-A-T-G-A--A-C-G-C--T-A-G-C-G-G--G-A-G-G--C---C-T--AA-C--AC-A-T-G--C-A-A-G--C-C--GA-G-CG-G---------T-A----T-T--T------------------------------------G-T-T-C------------------------TTC-G------------------------------G--A--A-C---------------------------A-G----A--GA--G-------AG-C-G-G-C-GC-A--C--G-GG-T-G-C-G-G-A--AC-A-C-G-T-G-TG---CAA-C-CT-G-C-C-TTT--AT-C-T-G-G--G-G-G---AT-AG-C--CT--T-T-C-G-A-A-A-----…
>H97X84I02JIZG6
A-A-C-G-A--A-C-G-C--T-G-G-C-G-G--C-A-T-G--C---C-T--AA-C--AC-A-T-G--C-A-A-G--T-C--GA-G-CG-G---------G-C------------------------------------------------G-T-A------------------------GCA-A------------------------------T--A--C---------------------------------------GT--C-------AG-C-G-G-C-AG-A--C--G-GG-T-G-A-G-T-A--AC-G-C-G-T-G-GG---A-A-C-AT-A-C-C-TTT--TG-G-T-T-C--G-G-A---AC-AA-C--AC--A-G-G-G-A-A-A-----…
>H97X84I02JEJ72
A-T-T-G-A--A-C-G-C--T-G-G-C-G-G--C-A-T-G--C---C-T--TA-C--AC-A-T-G--C-A-A-G--T-C--GA-A-CG-----------G-TAA--C-A--G----------------------------------------GTC------------------------TTCGGA--------------------------------T------------------------------G-C-T----G--AC--G-------AG-T-G-G-C-GA-A--C--G-GG-T-G-A-G-T-A--AT-A-C-A-T-C-GG---A-A-C-GT-G-C-C-CAG--TC-G-T-G-G--G-G-G---AT-AA-C--CG--C-T-C-G-A-A-A-----…
>H97X84I02JAQR2
A-A-C-G-A--A-C-G-C--T-G-G-C-G-G--C-A-T-G--C---C-T--AA-C--AC-A-T-G--C-A-A-G--T-C--GA-A-CG-A---------G-A--------------------------------------------------C-C------------------------TTC-G------------------------------G--G------------------------------------------TC--T-------AG-T-G-G-C-GC-A--C--G-GG-T-G-C-G-T-A--AC-G-C-G-T-G-GG---A-A-T-CT-G-C-C-CTT--GG-G-T-T-CG-G-G-A---AT-AA-C--TC--G-C-C-G-A-A-AG----…
>H97X84I02GFXK8
A-T-T-G-A--A-C-G-C--T-G-G-C-G-G--C-A-T-G--C---C-T--TA-C--AC-A-T-G--C-A-A-G--T-C--GA-A-CG-----------G-TAA--C-A--G--------------------------------------G----------------------------TT------------------------------------A--A---------------------------G-C-T----G--AC--G-------AG-T-G-G-C-GA-A--C--G-GG-T-G-A-G-T-A--AT-G-T-A-T-C-GG---A-A-C-GT-G-C-C-CGA--TC-G-T-G-G--G-G-G---AT-AA-C--GA--A-G-C-G-A-A-A-----…
>H97X84I02J3MEL
A-T-T-G-A--A-C-G-C--T-G-G-C-G-G--C-A-T-G--C---C-T--TA-C--AC-A-T-G--C-A-A-G--T-C--GA-A-CG-----------G-TAA--C-A--G--------------------------------------G-T-CT-----------------------TTC-G----------------G-------------G--A--T---------------------------G-C-T----G--AC--G-------AG-T-G-G-C-GA-A--C--G-GG-T-G-A-G-T-A--AC-A-C-A-T-C-GG---A-A-C-GT-G-C-C-TAG--TA-G-T-G-G--G-G-G---AT-AA-C--TA--C-T-C-G-A-A-A-----…
>H97X84I02J2YFP
G-A-T-G-A--A-C-G-C--T-A-G-C-G-G--C-A-G-G--C---T-T--AA-T--AC-A-T-G--C-A-A-G--T-C--GC-G-GG-----------G-CAG--C-A--T-------------------------------G--A---G-T-A------------------------GCA-A------------------------------T--A------C-T--T------------------G-A-T----G--GC--G-------AC-C-G-G-C-AA-A--C--G-GG-T-G-C-G-G-A--AC-A-C-G-T-A-CA---CAA-C-CT-T-C-C-TAC--AA-G-T-G-G--G-G-A---AT-AG-C--CC--A-G-A-G-A-A-A-----…
>H97X84I02J2DDC
A-A-C-G-A--A-C-G-C--T-G-G-C-G-G--C-G-T-G--C---T-T--AA-C--AC-A-T-G--C-A-A-G--T-C--GA-A-CG-----------G-AA---A-G--G--------------------------------C-C-A-G-T-G------------------------CTT-G------------------------------C--A--C-T-G-G-----------------------T-A----C--TC--G-------AG-T-G-G-C-GA-A--C--G-GG-T-G-A-G-T-A--AC-A-C-G-T-G-GG---TGA-T-CT-G-C-C-CTG--CA-C-T-T-C--G-G-G---AT-AA-G--CC--T-G-G-G-A-A-A-----…
>H97X84I02J1EL8
A-T-T-G-A--A-C-G-C--T-G-G-C-G-G--C-A-T-G--C---C-T--TA-C--AC-A-T-G--C-A-A-G--T-C--GA-A-CG-----------G-TAA--C-A--G--------------------------------------G-T-C------------------------TTC-G------------------------------G--A--T---------------------------G-C-T----G--AC--G-------AG-T-G-G-C-GA-A--C--G-GG-T-G-A-G-T-A--AT-A-C-A-T-C-GG---A-A-C-GT-G-C-C-CGA--TC-G-T-G-G--G-G-G--AGT-AA-C--GA--A-G-C-G-A-A-G-----…
>H97X84I02IVI9Y
G-A-T-G-A--A-C-G-C--T-A-G-C-G-G--G-A-G-G--C---C-T--AA-C--AC-A-T-G--C-A-A-G--C-C--GA-G-CG-G---------T-A----T-T--T------------------------------------G-T-T-C------------------------TTC-G------------------------------G--A--A-C---------------------------A-G----A--GA--G-------AG-C-G-G-C-GC-A--C--G-GG-T-G-C-G-G-A--AC-A-C-G-T-G-TG---CAA-C-CT-G-C-C-TTT--AT-C-T-G-G--G-G-G---AT-AG-C--CT--T-T-C-G-A-A-A-----…
>H97X84I02ISE64
A-T-T-G-A--A-C-G-C--T-G-G-C-G-G--C-A-T-G--C---C-T--TA-C--AC-A-T-G--C-A-A-G--T-C--GA-A-CG-----------G-CAG--C-G--C------------------------------------G-G-G-A------------------------GCA-A------------------------------T--C--C-T-------------------------G-G-C----G--GC--G-------AG-T-G-G-C-GA-A--C--G-GG-T-G-A-G-T-A--AT-A-T-A-T-C-GG---A-A-C-GT-G-C-C-CAG--TA-G-T-G-G--G-G-G---AT-AG-C--CC--G-G-C-G-A-A-A-----…
>H97X84I02IRV2T
G-A-T-G-A--A-C-G-C--T-A-G-C-G-G--G-A-G-G--C---C-T--AA-C--AC-A-T-G--C-A-A-G--C-C--GA-G-CG-G---------T-A----T-T--T------------------------------------G-T-T-C------------------------TTC-G------------------------------G--A--A-C---------------------------A-G----A--GA--G-------AG-C-G-G-C-GC-A--C--G-GG-T-G-C-G-G-A--AC-A-C-G-T-G-TG---CAA-C-CT-G-C-C-TTT--AT-C-T-G-G--G-G-G---AT-AG-C--CT--T-T-C-G-A-A-A-----…
>H97X84I02IQK3M
A-T-T-G-A--A-C-G-C--T-G-G-C-G-G--C-A-G-G--C---C-T--AA-C--AC-A-T-G--C-A-A-G--T-C--GA-G-CG-----------G-AT---G-A--A----------------------------------G-G-G-A-G------------------------CTT-G------------------------------C--T--C-C-T-------------------------G-G----A--TT--C-------AG-C-G-G-C-GG-A--C--G-GG-T-G-A-G-T-A--AT-G-C-C-T-A-GG---A-A-T-CT-G-C-C-TGG--TA-G-T-G-G--G-G-G---AT-AA-C--GT--C-C-G-G-A-A-A-----…
>H97X84I02IPW5U
A-A-C-G-A--A-C-G-C--T-G-G-C-G-G--C-A-T-G--C---C-T--AG-C--AC-A-T-G--C-A-A-G--T-C--GA-A-CG-A---------G-G--------------------------------------------------C-C------------------------CTC-G------------------------------G--G------------------------------------------TC--T-------AG-T-G-G-C-GC-A--C--G-GG-T-G-C-G-T-A--AC-G-C-G-T-G-GG---A-A-T-CT-G-C-C-CTT--GG-G-T-T-C--G-G-A---AT-AA-C--TC--G-C-C-G-A-A-A-----…
>H97X84I02ILWYV
A---T-G-A--A-C-G-C--T-A-G-C-G-G--G-A-G-G--C---C-T--AA-C--AC-A-T-G--C-A-A-G--T-C--GA-G-CG-G---------A-G----A-T--G----------------------------------A-G-G-T-G------------------------CTT-G------------------------------C--A--C-C-T-------------------------T-A----T--CT--T-------AG-C-G-G-C-GG-A--C--G-GG-T-G-A-G-T-A--AT-G-C-T-T-A-GG---A-A-T-CT-G-C-C-TAT--TA-G-T-G-G--G-G-G---AC-AA-C--AT--T-C-C-G-A-A-A-----…
>H97X84I02IJ14M
A-T-T-G-A--A-C-G-C--T-G-G-C-G-G--C-A-T-G--C---C-T--TA-C--AC-A-T-G--C-A-A-G--T-C--GA-A-CG-----------G-TAA--C-A--G--------------------------------------G-T-C------------------------TTC-G------------------------------G--A--T---------------------------G-C-T----G--AC--G-------AG-T-G-G-C-GA-A--C--G-GG-T-G-A-G-T-A--AT-A-C-A-T-C-GG---A-A-C-GT-G-C-C-CGA--TC-G-T-G-G--G-G-G---AT-AA-C--GA--A-G-C-G-A-G-A-----…
>H97X84I02IIZ0H
G-A-T-G-A--A-C-G-C--T-A-G-C-T-A--C-A-G-G--C---T-T--AA-C--AC-A-T-G--C-A-A-G--T-C--GC-G-GG-----------G-CAG--C-G--G----------------G--------------GGAT-G-A----G-----------------------CTT-G----------------CT------------C--A--T-C---C--C------------------G-C-C----G--GC--G-------AC-C-G-G-C-GC-A--C--G-GG-T-G-A-G-T-A--AC-A-C-G-T-A-TG---CAA-C-CT-G-C-C-CCT--GT-C-A-G-G--G-G-G---AC-AA-C--CC--A-C-C-G-A-A-A-----…
>H97X84I02IIXDA
A---C-G-A--A-C-G-C--T-G-G-C-G-G--C-A-G-G--C---T-T--AA-C--AC-A-T-G--C-A-A-G--T-C--GA-G-CG-G---------A-G----A-T--G----------------------------------A-G-G-T-G------------------------CTT-G------------------------------C--A--C-C-T-------------------------T-A----T--CT--T-------AG-C-G-G-C-GG-A--C--G-GG-T-G-A-G-T-A--AT-G-C-T-T-A-GG---A-A-T-CT-G-C-C-TAT--TG-G-T-G-G--G-G-G---AC-AA-C--AT--T-C-C-G-A-A-A-----…
>H97X84I02IFI85
G-A-T-G-A--A-C-G-C--T-G-G-C-G-G--C-G-T-G--C---T-T--AA-C--AC-A-T-G--C-A-A-G--T-C--GA-A-CG-----------G-AA---A-G--G--------------------------------C-C-A-G-T-G------------------------CTT-G------------------------------C--A--C-T-G-G-----------------------T-A----C--AC--G-------AG-T-G-G-C-GA-A--C--G-GG-T-G-A-G-T-A--AC-A-C-G-T-G-GG---TGA-T-CT-G-C-C-CTG--CA-C-T-T-C--G-G-G---AT-AA-G--CC--T-G-G-G-A-A-A-----…
>H97X84I02HM8CH
A-T-T-G-A--A-C-G-C--T-G-G-C-G-G--C-A-T-G--C---C-T--TA-C--AC-A-T-G--C-A-A-G--T-C--GA-A-CG-----------G-CAG--C-G--C--------------------------------------G-G-G------------------------AGC--------------------------------A--A--T---------------------------C-C-TGGC-G--GC--G-------AG-T-G-G-C-GA-A--C--G-GG-T-G-A-G-T-A--AT-A-C-A-T-C-GG---A-A-C-GT-G-C-C-CAG--AC-G-T-G-G--G-G-G---AT-AA-C--GA--G-G-C-G-A-A-A-----…
>H97X84I02I59C8
A-T-T-G-A--A-C-G-C--T-G-G-C-G-G--C-A-T-G--C---C-T--TA-C--AC-A-T-G--C-A-A-G--T-C--GA-A-CG-----------G-TAA--C-A---------------------------------------G-G---T------------------------CTT-C------------------------------G--G--A-T-------------------------G-C-T----G--AC--G-------AG-T-G-G-C-GA-A--C--G-GG-T-G-A-G-T-A--AT-G-C-A-T-C-GG---A-A-C-GT-G-C-C-GTG--TA-A-T-G-G--G-G-G---AT-AA-C--GT--A-G-C-G-A-A-A-----…
>H97X84I02IB92D
A-A-C-G-A--A-C-G-C--T-G-G-C-G-G--C-A-T-G--C---C-T--AA-C--AC-A-T-G--C-A-A-G--T-C--GA-A-CG-----------G-TAA--C-A--G--------------------------------------G-T-C------------------------TTC-G------------------------------G--A--C---------------------------G-C-T----G--AC--G-------AG-T-G-G-C-GA-A--C--G-GG-T-G-A-G-T-A--AT-A-C-A-T-C-GG---A-A-C-GT-G-C-C-CGA--TC-G-T-G-G--G-G-G---AT-AA-C--GA--G-G-C-G-A-A-A-----…
>H97X84I02I918S
A---T-G-A--A-C-G-C--T-G-G-C-G-G--C-G-T-G--C---T-T--AA-C--AC-A-T-G--C-A-A-G--T-C--GA-A-CG-----------G-TAA--C-A--G--------------------------------------G-T-C------------------------TTC-G------------------------------G--A--T---------------------------G-C-T----G--AC--G-------AG-T-G-G-C-GA-A--C--G-GG-T-G-A-G-T-A--AT-A-C-A-T-C-GG---A-A-C-GT-G-C-C-CGA--TC-G-T-G-G--G-G-G---AT-AA-C--GA--G-G-C-G-A-A-A-----…
>H97X84I02I7PR4
A-A-C-G-A--A-C-G-C--T-G-G-C-G-G--C-A-T-A--C---C-T--AA-C--AC-A-T-G--C-A-A-G--T-C--GA-A-CG-A---------G-A--------------------------------------------------C-C------------------------TTC-G------------------------------G--G------------------------------------------TC--T-------AG-T-G-G-C-GC-A--C--G-GG-T-G-C-G-T-A--AC-G-C-G-T-G-GG---A-A-T-CT-G-C-C-CTT--GG-G-T-T-C--G-G-A---AT-AA-C--TC--A-C-C-G-A-A-A-----…
>H97X84I02I7LHI
A-T-T-G-A--A-C-G-C--T-G-G-C-G-G--C-A-T-G--C---C-T--TA-C--AC-A-T-G--C-A-A-G--T-C--GA-A-CG-----------G-TAA--C-A--G--------------------------------------G-T-C------------------------TTC-G------------------------------G--A--T---------------------------G-C-T----G--AC--G-------AG-T-G-G-C-GA-A--C--G-GG-T-G-G-G-T-A--AT-A-C-A-T-C-GG---A-A-C-GT-G-C-C-CGA--TC-G-T---G--G-G-G---AT-AA-C--GA--A-G-C-G-A-A-A-----…
>H97X84I02I2FSL
A-T-C-G-A--A-C-G-C--T-G-G-C-G-G--C-A-T-G--C---C-T--TA-C--AC-A-T-G--C-A-A-G--T-C--GA-A-CG-----------G-CAG--C-A--C------------------------------------G-G-A-C------------------------TTC-G------------------------------G--T--C-T-------------------------G-G-T----G--GC--G-------AG-T-G-G-C-GA-A--C--G-GG-T-G-A-G-T-A--AT-G-T-A-T-C-GG---A-A-C-GT-A-C-C-TTT--CA-G-T-G-G--G-G-G---AT-AA-C--GT--A-G-C-G-A-A-A-----…
>H97X84I02I1CAD
G-A-C-G-A--A-T-G-C--T-G-G-C-G-G--C-G-T-G--C---C-T--AA-T--AC-A-T-G--C-A-A-G--T-C--GA-A-CG-A---------A-CC---G-C--A-------------------------------AC-T-T-G-A-A------------------------CTT-G---------------------------------T--T-C-T-CG-T------------------T-A-A----G--GT--T-------AG-T-G-G-C-GC-A--C--G-GG-T-G-A-G-T-A--AC-A-C-G-T-G-GG---GAA-C-CT-G-C-C-CTT--TA-G-T-G-G--G-G-G---AT-AA-C--AG--T-C-G-G-A-A-A-----…
>H97X84I02G710I
A-T-T-G-A--A-C-G-C--T-G-G-C-G-G--C-A-T-G--C---C-T--TA-C--AC-A-T-G--C-A-A-G--T-C--GA-A-CG-----------G-TAA--C-A--G--------------------------------------G----------------------------TT------------------------------------A--A---------------------------G-C-T----G--AC--G-------AG-T-G-G-C-GA-A--C--G-GG-T-G-A-G-T-A--AT-G-T-A-T-C-GG---A-A-C-GT-G-C-C-CAG--TC-G-T-G-G--G-G-G---AT-AA-C--TG--C-T-C-G-A-A-A-----…
>H97X84I02HZXD7
G-A-C-G-A--A-C-G-C--T-G-G-C-G-G--C-G-T-G--C---C-T--AA-C--AC-A-T-G--C-A-A-G--C-C--GA-A-CG-A---------G-A--------------------------------------------------C-C------------------------TTC-G------------------------------G--G------------------------------------------TC--T-------AG-T-G-G-C-GC-A--C--G-GG-T-G-C-G-T-A--AC-G-C-G-T-G-GG---A-A-T-CT-G-C-C-CTT--GG-G-T-C-C--G-G-A---AT-AA-C--TC--G-C-C-G-A-A-A-----…
>H97X84I02HYA2R
A-A-C-G-A--A-C-G-C--T-G-G-C-G-G--C-A-T-G--C---C-T--AA-C--AC-A-T-G--C-A-A-G--T-C--GA-A-CG-----------G-TAA--C-A--G--------------------------------------G-T-C------------------------TTC-G------------------------------G--A--T---------------------------G-C-T----G--AC--G-------AG-T-G-G-C-GA-A--C--G-GG-T-G-A-G-T-A--AT-A-C-A-T-C-GG---A-A-C-GT-G-C-C-CGA--TC-G-T-G-G--G-G-G---AT-AA-C--GA--A-G-C-G-A-A-A-----…
>H97X84I02HWZ4M
A-A-C-G-A--A-C-G-C--T-G-A-C-G-G--C-A-T-G--C---C-T--AA-C--AC-A-T-G--C-A-A-G--T-C--GA-A-CG-A---------G-A--------------------------------------------------C-C------------------------TTC-G------------------------------G--G------------------------------------------TC--T-------AG-T-G-G-C-GC-G--C--G-GG-T-G-C-G-T-A--AC-G-C-G-T-G-GG---A-A-T-CT-G-C-C-CTT--GG-G-T-T-C--G-G-A---AT-AA-C--TC--G-C-C-G-A-A-A-----…
>H97X84I02HW3M9
G-ATT-G-A--A-C-G-C--T-G-G-C-G-G--C-A-T-G--C---C-T--TA-C--AC-A-T-G--C-A-A-G--T-C--GA-G-GG-----------G-CAG--C-G--G----------------G--------------GG-A-G-T-A--------------------------GCA-A---------------------------------T--A-C-T-C--CC-----------------G-C-C----G--GC--G-------AC-C-G-G-C-GC-A--C--G-GG-T-G-A-G-T-A--AC-A-C-G-T-A-TG---AAA-C-CT-G-C-C-CGT--AG-C-A-G-G--G-G-G---AT-AA-G--CG--G-A-A-G-A-A-A-----…
>H97X84I02HUE0N
A-A-C-G-A--A-C-G-C--T-G-G-C-G-G--C-A-T-G--C---C-T--AA-C--AC-A-T-G--C-G-A-G--T-C--GA-A-CG-A---------G-A--------------------------------------------------C-C------------------------TTC-G------------------------------G--G------------------------------------------TC--T-------AG-T-G-G-C-GC-A--C--G-GG-T-G-C-G-T-A--AC-G-C-G-T-G-GG---A-A-T-CT-G-C-C-CTT--GG-G-T-T-C--G-G-A---AT-AA-C--TC--G-C-C-G-A-A-A-----…
>H97X84I02HSCQ5
A-T-T-G-A--A-C-G-C--T-G-G-C-G-G--C-A-T-G--C---C-T--TA-C--AC-A-T-G--C-A-A-G--T-C--GA-A-CG-----------G-TAA--C-A--G--------------------------------------G-T-C------------------------TTC-G------------------------------G--A--C---------------------------G-C-T----G--AC--G-------AG-T-G-G-C-GA-A--C--G-GG-T-G-A-G-T-A--AT-A-C-A-T-C-GG---A-A-C-GT-G-C-C-CAG--TC-G-T-G-G--G-G-G---AT-AA-C--TA--C-T-C-G-A-A-A-----…
>H97X84I02HM7RE
A---C-G-A--A-C-G-C--T-G-G-C-G-G--C-A-G-G--C---T-T--AA-C--AC-A-T-G--C-A-A-G--T-C--GA-G-CG-G---------A-G----A-T--G----------------------------------A-G-G-T-G------------------------CTT-G------------------------------C--A--C-C-T-------------------------T-A----T--CT--T-------AG-C-G-G-C-GG-A--C--G-GG-T-G-A-G-T-A--AT-G-C-T-T-A-GG---A-A-T-CT-G-C-C-TAT--TA-G-T-G-G--G-G-A---AC-AA-C--AT--T-C-C-G-A-A-A-----…
>H97X84I02HLN41
G-AGC-G-A--A-C-G-C--T-A-G-C-T-A--C-A-G-G--C---T-T--AA-C--AC-A-T-G--C-A-A-G--T-C--GA-G-GG-----------G-CAG--C-A--T--------------G----------------GC-C-T-A-T-C------------------------TTTCGG-----------------------------G--A--T-G-G-G--C-C----------------G-A-T----G--GC--G-------AC-C-G-G-C-GC-A--C--G-GG-T-G-A-G-T-A--AC-G-C-G-T-A-TC---CAA-C-CT-T-C-C-CTT--TA-C-T-G-G--G-G-C---CC-AG-C--CC--G-T-C-G-A-A-A-----…
>H97X84I02HJ9UM
G-A-T-G-A--G-C-G-C--T-A-G-C-G-G--G-A-G-G--C---C-T--AA-C--AC-A-T-G--C-A-A-G--C-C--GA-G-CG-----------G-TA---G-A--G------------------------------------A-T-C-T------------------------TTC-G------------------------------G--G--A-T---------------------------C-T----T--GA--G-------AG-C-G-G-C-GT-A--C--G-GG-T-G-C-G-G-A--AC-A-C-G-T-G-TG---CAA-C-CT-G-C-C-TTT--AT-C-T-G-G--G-G-G---AT-AG-C--CT--T-T-C-G-A-A-A-----…
>H97X84I02HE8ZZ
G-A-T-G-A--A-C-G-C--T-G-G-C-G-G--C-G-T-G--C---T-T--AA-C--AC-A-T-G--C-A-A-G--T-C--GA-G-GG-----------G-CAG--C-A--T----------------G--------------GC-C-T-A-T-C------------------------TTTCGG-----------------------------G--A--T-G-G-G--CC-----------------G-A-T----G--GC--G-------AC-C-G-G-C-GC-A--C--G-GG-T-G-A-G-T-A--AC-G-C-G-T-A-TC---CAA-C-CT-T-C-C-CTT--TA-C-T-G-G--G-G-T---CC-AG-C--CC--G-T-C-G-A-A-A-----…
>H97X84I02HCXYM
G-A-T-G-A--A-C-G-C--T-A-G-C-T-A--C-A-G-G--C---T-T--AA-C--AC-A-T-G--C-A-A-G--T-C--GA-G-GG-----------G------C-G--G--------------C-A--------------TG-G-C-C-TAT------------------------CTT-T------------------------------C--G--G-G-A-T--GGGCC--------------G-A-T----G--GC--G-------AC-C-G-G-C-GC-A--C--G-GG-T-G-A-G-T-A--AC-G-C-G-T-A-TC---CAA-C-CT-T-C-C-CTT--TA-C-T-G-G--G-G-T---CC-AG-C--CC--G-T-C-G-A-A-A-----…
>H97X84I02HAD5M
A-T-T-G-A--A-C-G-C--T-G-G-C-G-G--C-A-T-G--C---C-T--TA-C--AC-A-T-G--C-A-A-G--T-C--GA-A-CG-----------G-TAA--C-A--G--------------------------------------G-T-C------------------------TTC-G------------------------------G--A--T---------------------------G-C-T----G--AC--G-------AG-T-G-G-C-GA-A--C--G-GG-T-G-A-G-T-A--AT-A-C-A-T-C-GG---A-A-C-GT-G-C-CCAGA---C-G-T-G-G--G-G-G---AT-AA-C--GA--G-G-C-G-A-A-A-----…
>H97X84I02H9OOQ
G-A-T-G-A--G-C-G-C--T-A-G-C-G-G--G-A-G-G--C---C-T--AA-C--AC-A-T-G--C-A-A-G--C-C--GA-G-CG-G---------T-A----T-T--G------------------------------------T-T-T-C------------------------TTC-G------------------------------G--A--A-A---------------------------T-G----A--GA--G-------AG-C-G-G-C-GT-A--C--G-GG-T-G-C-G-G-A--AC-A-C-G-T-G-TG---CAA-C-CT-G-C-C-TTT--AT-C-T-G-G--G-G-G---AT-AG-C--CT--T-T-C-G-A-A-A-----…
>H97X84I02H7J2V
A-A-C-G-A--A-C-G-C--T-G-G-C-G-G--G-A-G-G--C---C-T--AA-C--AC-A-T-G--C-A-A-G--C-C--GA-G-CG-G---------T-A----T-T--G------------------------------------T-T-T-C------------------------TTC-G------------------------------G--A--A-A---------------------------T-G----A--GA--G-------AG-C-G-G-C-GT-A--C--G-GG-T-G-C-G-G-A--AC-A-C-G-T-G-TG---CAA-C-CT-G-C-C-TTT--AT-C-T-G-G--G-G-G---AT-AG-C--CT--T-T-C-G-A-A-A-----…
>H97X84I02H6MTE
G-AGC-G-A--A-C-G-C--T-G-G-C-G-G--C-A-T-G--C---C-T--AA-C--AC-A-T-G--C-A-A-G--T-C--GA-G-GG-----------G-CAG--C-G--G----------------G--------------GG-T-G-A-G-AG-----------------------CTT-G----------------C-------------T--C--T-C-A-C--CT-----------------G-C-C----G--GC--G-------AC-C-G-G-C-GC-A--C--G-GG-T-G-A-G-T-A--AC-A-C-G-T-A-TG---CAA-C-CT-G-C-C-TGT--CA-C-T-G-G--G-G-G---AT-AA-G--CG--G-A-A-G-A-A-A-----…
>H97X84I02H69A9
G-A-C-G-A--A-C-G-C--T-G-G-C-T-G--C-G-T-G--C---T-T--AA-C--AC-A-T-G--C-A-A-G--T-C--GA-A-CG-C---------T-G----A-A--G-------------------------------CC-T-G-G-T-G------------------------CTT-G------------------------------C--A--C-C-G-G--G--------------------T-G----G--AT--G-------AG-T-G-G-C-GA-A--C--G-GG-T-G-A-G-T-A--AC-A-C-G-T-G-AG---TAA-C-CT-G-C-C-CCT--GA-C-T-T-C--G-G-G---AT-AA-G--CC--C-G-G-G-A-A-A-----…
>H97X84I02H5UW7
G-A-C-G-A--A-C-G-C--T-G-G-C-G-G--C-G-T-G--C---T-T--AA-C--AC-A-T-G--C-A-A-G--T-C--GA-G-GG-----------G-CAG--C-G--G----------------G--------------GGTG-A-G-A-G------------------------CTT-G------------------------------C--T--C-T-CAC--CT-----------------G-C-C----G--GC--G-------AC-C-G-G-C-GC-A--C--G-GG-T-G-A-G-T-A--AC-G-C-G-T-A-TC---CAA-C-CT-T-C-C-CTT--TA-C-T-G-G--G-G-T---CC-AG-C--CC--G-T-C-G-A-A-A-----…
>H97X84I02H5HS7
A---T-G-A--A-C-G-C--T-G-G-C-G-G--C-G-T-G--C---T-T--AA-C--AC-A-T-G--C-A-A-G--T-C--GA-A-CG-----------G-TAA--C-A--G------------------------------------G-G-A-G------------------------CTT-G------------------------------C--T--C-C-------------------------G-C-T----G--AC--G-------AG-T-G-G-C-GA-A--C--G-GG-T-G-A-G-T-A--AT-G-C-A-T-C-GG---A-A-C-GT-G-C-C-GTG--TA-A-T-G-G--G-G-G---AT-AA-C--GT--A-G-C-G-A-A-A-----…
>H97X84I02H0MZ7
G-A-C-G-A--A-C-G-C--T-G-G-C-G-G--C-G-T-G--C---C-T--AA-T--AC-A-T-G--C-A-A-G--T-C--GA-A-CG-----------A--------A--C------------CGC-A--------------AC-T-T-G-A-A------------------------CTT-G------------------------------T--T--C-T-C----GTT--AA--------------G-G--------T--T-------AG-T-G-G-C-GC-A--C--G-GG-T-G-A-G-T-A--AC-A-C-G-T-G-GG---GAA-C-CT-G-C-C-CTT--TA-G-T-G-G--G-G-G---AT-AA-C--AG--T-C-G-G-A-A-A-----…
>H97X84I01AT8PP
G-A-T-G-A--A-C-G-C--T-A-G-C-G-A--C-A-G-G--C---T-T--AA-C--AC-A-T-G--C-A-A-G--T-C--GA-G-GG-----------G-CAG--C-G--G----------------G--------------GG-A-G-T-A--------------------------GCA-A---------------------------------T--A-C-T-C--CC-----------------G-C-C----G--GC--G-------AC-C-G-G-C-GC-A--C--G-GG-T-G-A-G-T-A--AC-A-C-G-T-A-TG---AAA-C-CT-G-C-C-CGT--AG-C-A-G-G--G-G-G---AT-AA-G--CG--G-A-A-G-A-A-A-----…
>H97X84I02GYK40
A-T-T-G-A--A-C-G-C--T-G-G-C-G-G--C-A-T-G--C---C-T--TA-C--AC-A-T-G--C-A-A-G--T-T--GA-A-CG-----------G-TAA--C-A--G--------------------------------------G-T-C------------------------TTC-G------------------------------G--A--T---------------------------G-C-T----G--AC--G-------AG-T-G-G-C-GA-A--C--G-GG-T-G-A-G-T-A--AT-A-C-A-T-C-GG---A-A-C-GT-G-C-C-CGA--TC-G-T-G-G--G-G-G---AT-AA-C--GA--A-G-C-G-A-A-A-----…
>H97X84I02GXJL9
A-A-C-G-A--A-C-G-C--T-G-G-C-G-G--C-A-T-G--C---C-T--TA-C--AC-A-T-G--C-A-A-G--T-C--GA-A-CG-----------G-TAA--C-A--G--------------------------------------G-T-CT-----------------------TTC-G----------------G-------------G--A--T---------------------------G-C-T----G--AC--G-------AG-T-G-G-C-GA-A--C--G-GG-T-G-A-G-T-A--AC-A-C-A-T-C-GG---A-A-C-GT-G-C-C-TAG--CA-G-T-G-G--G-G-G---AT-AA-C--TA--C-T-C-G-A-A-A-----…
>H97X84I02GWA2D
A-T-T-G-A--A-C-G-C--T-G-G-C-G-G--C-A-T-G--C---C-T--TA-C--AC-A-T-G--C-A-A-G--T-C--GA-A-CG-----------G-TAA--C-A--G--------------------------------------G-T-C------------------------TTC-G------------------------------G--A--T---------------------------G-C-T----G--AC--G-------AG-T-G-G-C-GA-G--C--G-GG-T-G-A-G-T-A--AT-A-C-A-T-C-GG---A-A-C-GT-G-C-C-CGA--TC-G-T-G-G--G-G-G---AT-AA-C--GA--A-G-C-G-A-A-A-----…
>H97X84I02G6QTB
G-A-T-G-A--A-C-G-C--T-A-G-C-G-A--C-A-G-G--C---T-T--AA-C--AC-A-T-G--C-A-A-G--T-C--GA-G-GG-----------G-CAG--C-------------------G----------------GG-G-G---A-G-------------------------TA-G------------------------------C--A--ATA-C-TC-C-C----------------G-C-C----G--GC--G-------AC-C-G-G-C-GC-A--C--G-GG-T-G-A-G-T-A--AC-G-C-G-T-A-TC---CAA-C-CT-T-C-C-CTT--TA-C-T-G-G--G-G-T---CC-AG-C--CC--G-T-C-G-A-A-A-----…
>H97X84I02GTHP9
A-A-C-G-A--A-C-G-C--T-G-G-C-G-G--C-A-T-G--C---C-T--AA-C--AC-A-T-G--C-A-A-G--T-C--GA-A-CG-C---------T-T----T-T--T-----------CTTT-C--------------AC-C-G-G-A-G------------------------CTT-G------------------------------C--T--C-C-A-C--CGA--AAG-------------A-A----A--AA--G-------AG-T-G-G-C-GA-A--C--G-GG-T-G-A-G-T-A--AC-A-C-G-T-G-GG---TAA-C-CT-G-C-C-CAT--CA-G-A-A-G--G-G-G---AT-AA-C--AC--T-T-G-G-A-A-A-----…
>H97X84I02GT616
G-A-C-G-A--A-C-G-C--T-G-G-C-G-G--C-A-T-G--C---C-T--AA-C--AC-A-T-G--C-A-A-G--T-C--GA-A-CG-A---------G-G--------------------------------------------------C-C------------------------TTC-G------------------------------A--G------------------------------------------TC--T-------AG-T-G-G-C-GC-A--C--G-GG-T-G-C-G-T-A--AC-G-C-G-T-G-GG---A-A-T-CT-G-C-C-CTT--GG-G-T-T-C--G-G-A---AT-AA-C--TC--G-C-C-G-A-A-A-----…
>H97X84I02GRCL1
G-A-T-G-A--A-C-G-C--T-G-G-C-G-G--C-G-T-G--C---T-T--AA-C--AC-A-T-G--C-A-A-G--T-C--GA-A-C--G-----------G----A-C--T----------C-AT--A--------------TT-G-A-A-A-C------------------------CT--A------------------------------G-----T-G---A---TT--TATG--------------A-------GT--T-------AG-T-G-G-C-GG-A--C--G-GG-T-G-A-G-T-A--AC-G-C-G-T-G-GA---TAA-C-CT-G-C-C-GTA--TA-C-C-G-G--G-G-G---AT-AA-C--AC--T-T-A-G-A-A-A-----…
>H97X84I02GPVTL
A-T-T-G-A--A-C-G-C--T-G-G-C-G-G--C-A-T-G--C---C-T--TA-C--AC-A-C-G--C-A-A-G--T-C--GA-A-CG-----------G-TAA--C-A--G--------------------------------------G-T-C------------------------TTC-G------------------------------G--A--T---------------------------G-C-T----G--AC--G-------AG-T-G-G-C-GA-A--C--G-GG-T-G-A-G-T-A--AT-A-C-A-T-C-GG---A-A-C-GT-G-C-C-CGA--TC-G-T---G--G-G-G---AT-AA-C--GA--A-G-C-G-G-A-A-----…
>H97X84I02JXAXQ
A-T-T-G-A--A-C-G-C--T-G-G-C-G-G--C-A-T-G--C---C-T--TA-C--AC-A-T-G--C-A-A-G--T-C--GA-A-CG-----------G-TAA--C-A--G--------------------------------------G-T-C------------------------TTC-G------------------------------G--A--T---------------------------G-C-T----G--AC--G-------AG-T-G-G-C-GA-A--C--G-GG-T-G-A-G-T-A--AT-A-C-A-T-C-GG---A-A-C-GT-G-C-C-CGA--TC-G-T-G-G--G-G-G---AT-AA-C--GA--A-G-C-G-A-A-A-----…
>H97X84I02GMIQY
A-A-C-G-A--A-C-G-C--T-G-G-C-G-G--C-A-T-G--C---C-T--AA-C--AC-A-T-G--C-A-A-G--T-C--GA-A-CG-G-----------G----C-T-------------C-A---T---------------A-T-T-G-A--A---------------------------A------------C-CT--------------A--G--T-G-A-T---TT--AT-G--------------A-------GT--T-------AG-T-G-G-C-GG-A--C--G-GG-T-G-A-G-T-A--AC-G-C-G-T-G-GA---AAA-C-CT-G-C-C-GTA--TA-C-T-G-G--G-G-G---AT-AA-C--AC--T-T-A-G-A-A-A-----…
>H97X84I02HUE9P
A-T-T-G-A--A-C-G-C--T-G-G-C-G-G--C-A-T-G--C---C-T--TA-C--AC-A-T-G--C-A-A-G--T-C--GA-A-CG-----------G-TAA--C-A---------------------------------------G-G-T-C------------------------TTC-G------------------------------G-----A-T-------------------------G-C-T----G--AC--G-------AG-T-G-G-C-GA-A--C--G-GG-T-G-A-G-T-A--AT-A-C-A-T-C-GG---A-A-C-GTGC-C-C-GAT--C--G-T-G-G--G-G-G---AT-AA-C--GT--A-G-C-G-A-A-A-----…
>H97X84I02GGQGA
A-T-T-G-A--A-C-G-C--T-G-G-C-G-G--C-A-C-G--T---C-T--TA-C--AC-A-T-G--C-A-A-G--T-C--GA-A-CG-----------G-TAA--C-A--G--------------------------------------G-T-C------------------------TTC-G------------------------------G--A--T---------------------------G-C-T----G--AC--G-------AG-T-G-G-C-GA-A--C--G-GG-T-G-A-G-T-A--AT-A-C-A-T-C-AG---A-A-C-GT-G-C-C-CAG--AC-G-T-G-G--G-G-G---AT-AA-C--GA--G-G-C-G-A-A-A-----…
>H97X84I02GGO2T
G-A-T-G-A--A-C-G-C--T-A-G-C-G-G--G-A-G-G--C---C-T--AA-C--AC-T-T-G--C-A-A-G--C-C--GA-G-CG-G---------T-A----T-T--G------------------------------------T-T-T-C------------------------TTC-G------------------------------G--A--A-A---------------------------T-G----A--GA--G-------AG-C-G-G-C-AT-A--C--G-GG-T-G-C-G-G-A--AC-A-C-G-T-G-TG---CAA-C-CT-G-C-C-TTT--AT-C-T-G-G--G-G-G---AT-AG-C--CT--T-T-C-G-A-A-A-----…
>H97X84I02GDEPJ
A-T-T-G-A--A-C-G-C--T-G-G-C-G-G--C-A-T-G--C---C-T--TA-C--AC-A-T-G--C-A-A-G--T-C--GA-A-CG-----------G-TAA--C-A--G--------------------------------------G----------------------------TT------------------------------------A--A---------------------------G-C-T----G--AC--G-------AG-T-G-G-C-GA-A--C--G-GG-T-G-A-G-T-A--AT-A-C-A-T-C-GG---A-A-C-GT-G-C-C-CGA--TC-G-T-G-G--G-G-G---AT-AA-C--GA--A-G-C-G-A-A-A-----…
>H97X84I02G9W1R
A-G-C-G-A--A-C-G-C--T-G-G-C-G-G--C-A-G-G--C---T-T--AA-C--AC-A-T-G--C-A-A-G--T-C--GA-G-CG-G---------G-G----T-G--A----------------------------------G-G-T-G-C------------------------TTC-G------------------------------G--T--A-C-T-------------------------G-A----T--CC--T-------AG-C-G-G-C-GG-A--C--G-GG-T-G-A-G-T-A--AT-G-C-T-T-A-GG---A-A-T-CT-G-C-C-ATT--TA-G-C-G-G--G-G-G---AC-AA-C--AT--T-C-C-G-A-A-A-----…
>H97X84I02G2WG9
G-A-C-G-A--A-C-G-C--T-G-G-C-G-G--C-G-T-G--C---T-T--AA-C--AC-A-T-G--C-A-A-G--T-C--GA-A-CG-----------G-A----A-A--G-------------------------------GC---C-C-T-G------------------------CTT-T------------------------------T--G--T-G-G-G--G--------------------T-G----C--TC--G-------AG-T-G-G-C-GA-A--C--G-GG-T-G-A-G-T-A--AC-A-C-G-T-G-AG---TAA-C-CT-G-C-C-CTT--GA-C-T-T-T--G-G-G---AT-AA-C--TT--C-A-G-G-A-A-A-----…
>H97X84I02G26MH
A-T-T-G-A--A-C-G-C--T-G-G-C-G-G--C-A-T-G--C---C-T--TA-C--AC-A-T-G--C-A-A-G--T-C--GA-A-CG-----------G-TAA--C-A--G--------------------------------------G-T-C------------------------TTC-G------------------------------G--A--T---------------------------G-C-T----G--AC--G-------AG-T-G-G-C-GA-A--C--G-GG-T-G-A-G-T-A--AT-A-C-A-T-C-GG---A-A-T-GT-G-C-C-CGA--TC-G-T-G-G--G-G-G---AT-AA-C--GA--A-G-C-G-A-A-A-----…
>H97X84I02FZ2XH
G-A-T-G-A--A-C-G-C--T-A-G-C-G-G--C-A-G-G--C---T-T--AA-C--AC-A-T-G--C-A-A-G--T-C--GC-G-GG-----------G-CAG--C-G--G----------------G--------------GGAT-G-A----G-----------------------CTT-G----------------CT------------C--A--T-C---C--C------------------G-C-C----G--GC--G-------AC-C-G-G-C-GC-A--C--G-GG-T-G-A-G-T-A--AC-A-C-G-T-A-TG---CAA-C-CT-G-C-C-CCT--GT-C-A-G-G--G-G-G---AC-AA-C--CC--A-C-C-G-A-A-A-----…
>H97X84I02FY0ST
A-A-C-G-A--A-C-G-C--T-G-G-C-G-G--G-A-G-G--C---C-T--AA-C--AC-A-T-G--C-A-A-G--C-C--GA-G-CG-G---------T-A----T-T--G------------------------------------T-T-T-C------------------------TTC-G------------------------------G--A--A-A---------------------------T-G----A--GA--G-------AG-C-G-G-C-GT-A--C--G-GG-T-G-C-G-G-A--AC-A-C-G-T-G-TG---CAA-C-CT-G-C-C-TTT--AT-C-T-G-G--G-G-G---AT-AG-C--CT--T-T-C-G-A-A-A-----…
>H97X84I02FUN7T
A-T-T-G-A--A-C-G-C--T-G-G-C-G-G--C-A-G-G--C---T-T--AA-C--AC-A-T-G--C-A-A-G--T-C--GA-A-CG-----------A-TGA--A-A--C----------------------------------T-C-T-A-G------------------------CTT-G------------------------------C--T--A-G-A-------------------------G-AA---G--AT--T-------AG-T-G-G-C-GG-A--C--G-GG-T-G-A-G-T-A--AC-A-T-T-T-A-GG---A-A-T-CT-G-C-C-TAG--TA-G-T-G-G--G-G-G---AT-AG-C--TC--G-G-G-G-A-A-A-----…
>H97X84I02FTFAO
A-G-T-G-A--A-C-G-C--T-G-G-C-G-G--C-A-G-G--C---C-T--AA-T--AC-A-T-G--C-A-A-G--T-C--GA-A-CG-----------G-CAG--C-A--C----------------A--------------G--C-A-G-A-G------------------------CTT-G------------------------------C--T--C-T-G----TG-----------------G-G-T----G--GC--G-------AG-T-G-G-C-GG-A--C--G-GG-T-G-A-G-G-A--AT-A-C-A-T-G-GG---A-A-T-CT-G-C-C-CAG--TC-G-T-G-G--G-G-G---AT-AA-C--GT--A-G-G-G-A-A-A-----…
>H97X84I02FSTNF
A-A-C-G-A--A-C-G-C--T-G-G-C-G-G--C-A-T-G--C---C-T--AA-C--AC-A-T-G--C-A-A-G--T-C--GA-A-CG-----------G-TAA--C-A--G--------------------------------------G-T-C------------------------TTC-G------------------------------G--A--T---------------------------G-C-T----G--AC--G-------AG-T-G-G-C-GA-A--C--G-GG-T-G-A-G-T-A--AT-A-C-A-T-C-GG---A-A-C-GT-G-C-C-CGA--TC-G-T-G-G--G-G-G---AT-AA-C--GA--A-G-C-G---A-A-----…
>H97X84I02FSKA6
A-G-C-G-A--A-C-G-C--T-G-G-C-G-G--C-A-G-G--C---T-T--AA-C--AC-A-T-G--C-A-A-G--T-C--GA-G-CG-G---------G-C------------------------------------------------A-T-A------------------------GCA-A------------------------------T--A--T---------------------------------------GT--C-------AG-C-G-G-C-AG-A--C--G-GG-T-G-A-G-T-A--AC-G-C-G-T-G-GG---A-A-C-GT-A-C-C-TTT--TG-G-T-T-C--G-G-G---AC-AA-C--AC--A-G-G-G-A-A-A-----…
>H97X84I02FP20E
G-A-T-G-A--A-C-G-C--T-A-G-C-G-G--G-A-G-G--C---C-T--AA-C--AC-T-T-G--C-A-A-G--C-C--GA-GCGGTATT-------GTT--------------------------------------------------T-C------------------------TTC-G------------------------------G--A------------------------------------------AA--TG------AG-A-GAG-CGGCGTA-C--G-GG-T-G-C-G-T-A--AC-G-C-G-T-G-GG---A-A-T-CT-G-C-C-CTT--GG-G-T-T-C--G-G-A---AT-AA-C--TC--G-C-C-G-A-A-A-----…
>H97X84I02FMV3S
A-A-C-G-A--A-C-G-C--T-G-G-C-G-G--C-A-T-A--C---T-T--AA-C--AC-A-T-G--C-A-A-G--T-C--GA-A-CG-A---------G-A--------------------------------------------------C-C------------------------TTC-G------------------------------G--G------------------------------------------TC--T-------AG-T-G-G-C-GC-A--C--G-GG-T-G-C-G-T-A--AC-G-C-G-T-G-GG---A-A-T-CT-G-C-C-CTT--GG-G-T-T-C--G-G-A---AT-AA-C--TC--G-C-C-G-A-A-A-----…
>H97X84I02FJEQD
A-T-T-G-A--A-C-G-C--T-G-G-C-G-G--C-A-T-G--C---C-T--TA-C--AC-A-T-G--C-A-A-G--T-C--GA-A-CG-----------G-TAA--C-A--G--------------------------------------G-T-C------------------------TTC-G------------------------------G--A--T---------------------------G-C-T----G--AC--G-------AG-T-G-G-C-GA-A--C--G-GG-T-G-A-G-T-A--AT-A-C-A-T-C-GG---A-A-C-GT-G-C-C-C-G-ATC-G-T-G-G--G-G-G---AT-AA-C--GA--A-G-C-G-A-A-A-----…
>H97X84I02FIUH2
G-A-T-G-A--A-C-G-C--T-A-G-C-G-A--C-A-G-G--C---T-T--AA-C--AC-A-T-G--C-A-A-G--T-C--GA-G-GG-----------G-CAG--C-A--T----------------G--------------GC-C-T-A-T-C------------------------TTTCGG-----------------------------G--A--T-G-G-G--CC-----------------G-A-T----G--GC--G-------AC-C-G-G-C-GC-A--C--G-GG-T-G-A-G-T-A--AC-G-C-G-T-A-TC---CAA-C-CT-T-C-C-CTT--TA-C-T-G-G--G-G-T---CC-AG-C--CC--G-T-C-G-A-A-A-----…
>H97X84I02FIL80
A-T-T-G-A--A-C-G-C--T-G-G-C-G-G--C-A-G-G--C---C-T--AA-C--AC-A-T-G--C-A-A-G--T-C--GG-G-CG-G---------A-T----G-A--G----------------------------------G-G-G-A-G------------------------CTT-G------------------------------C--T--C-C-T-------------------------T-G----A--TT--C-------AG-C-G-G-C-GG-A--C--G-GG-T-G-A-G-T-A--AT-G-C-C-T-A-GG---A-A-T-CT-G-C-C-TGG--TA-G-T-G-G--G-G-G---AT-AA-C--GT--T-C-C-G-A-A-A-----…
>H97X84I02FEX0W
A-T-T-G-A--A-C-G-C--T-G-G-C-G-G--C-A-T-G--C---C-T--TA-C--AC-A-T-G--C-A-A-G--T-C--GA-A-CG-----------G-TAA--C-A--G----------------------------------------G--------------------------TT--A---------------------------------A------------------------------G-C-T----G--AC--G-------AG-T-G-G-C-GA-A--C--G-GG-T-G-A-G-T-A--AT-G-T-A-T-C-GG---A-A-C-GT-G-C-C-CAG--TC-G-T-G-G--G-G-G---AT-AA-C--TG--C-T-C-G-A-A-A-----…
>H97X84I02GECDN
G-A-C-G-A--A-C-G-C--T-G-G-C-G-G--C-G-T-G--C---C-T--AA-T--AC-A-T-G--C-A-A-G--T-C--GA-A-CGAACC-------GCAA---------------------------------------------CTTGAACTTGT-------------------TCTC-GTTAA--------------------------G--G------------------------------------------T---T-------AG-T-G-G-C-GC-A--C--G-GG-T-G-C-G-T-A--AC-G-C-G-T-G-GG---A-A-T-CT-G-C-C-CTT--GG-G-T-T-C--G-G-A---AT-AA-C--TC--G-C-C-G-A-A-A-----…
>H97X84I02F95C2
G-A-T-G-A--A-C-G-C--T-A-G-C-G-G--G-A-G-G--C---C-T--AA-C--AC-A-T-G--C-A-A-G--C-C--GA-G-CG-G---------T-A----T-T--G------------------------------------T-T-T-C------------------------TTC-G------------------------------G--A--A-A---------------------------T-G----A--GA--G-------AG-C-G-G-C-GT-A--C--G-GG-T-G-C-G-G-A--AC-A-C-G-T-G-TG---CAA-C-CT-G-C-C-TTT--AT-C-T-G-G--G-G-G---AT-AG-C--CT--T-T-T-G-A-A-A-----…
>H97X84I02F7YEB
A-T-T-G-A--A-C-G-C--T-G-G-C-G-G--C-A-T-G--C---C-T--TA-C--AC-A-T-G--C-A-A-G--T-C--GA-A-CG-----------G-CAG--C-A--C------------------------------------G-G-A-C------------------------TTC-G------------------------------G--T--C-T-------------------------G-G-T----G--GC--G-------AG-T-G-G-C-GA-A--C--G-GG-T-G-A-G-T-A--AT-G-T-A-T-C-GG---A-A-C-GT-A-C-C-TTT--CA-G-T-G-G--G-G-G---AT-AA-C--GT--A-G-C-G-A-A-A-----…
>H97X84I02F7W2S
G-A-T-G-A--A-C-G-C--T-G-G-C-G-G--C-G-T-G--C---C-T--AA-C--AC-A-T-G--C-A-A-G--T-C--GA-G-GG-----------G-CAG--C-G--G----------------G--------------GG-A-G-T-A--------------------------GCA-A---------------------------------T--A-C-T-C--CC-----------------G-C-C----G--GC--G-------AC-C-G-G-C-GC-A--C--G-GG-T-G-A-G-T-A--AC-A-C-G-T-A-TG---AAA-C-CT-G-C-C-CGT--AG-C-A-G-G--G-G-G---AT-AA-G--CG--G-A-A-G-A-A-A-----…
>H97X84I02F7JFQ
G-A-T-G-A--A-C-G-C--T-A-G-C-G-A--C-A-G-G--C---T-T--AA-C--AC-A-T-G--C-A-A-G--T-C--GA-G-GG-----------G-CAG--C-G--G----------------G--------------GG-A-G-T-A--------------------------GCA-A---------------------------------T--A-C-T-C--CC-----------------G-C-C----G--GC--G-------AC-C-G-G-C-GC-A--C--G-GG-T-G-A-G-T-A--AC-A-C-G-T-A-TG---AAA-C-CT-G-C-C-CGT--AG-C-A-G-G--G-G-G---GT-AA-G--CG--G-A-A-G-A-A-A-----…
>H97X84I02HXAWP
A-T-T-G-A--A-C-G-C--T-G-G-C-G-G--C-A-T-G--C---C-T--TA-C--AC-A-T-G--C-A-A-G--T-C--GA-A-CG-----------GCAGCA-C-G--G----------------------------------------A-C------------------------TTC-G------------------------------GT-C--T---------------------------G-G-T----G--GC--G-------AG-T-G-G-C-GA-A--C--G-GG-T-G-A-G-T-A--AT-A-C-A-T-C-GG---A-A-C-GT-G-C-C-CGA--TC-G-T-G-G--G-G-G---AT-AA-C--GA--G-G-C-G-A-A-A-----…
>H97X84I02FYK40
G-A-C-G-A--A-C-G-C--T-G-G-C-G-G--C-G-T-G--C---C-T--AA-T--AC-A-T-G--C-A-A-G--T-C--GA-G-CG-A---------G-C----T-T--G---CCTA--GATGA--T--------------TT-T-A-G-T-G------------------------CTT-G------------------------------C--A--C-T-A-A--AT---GAAACTAG-A----TAC-A----A--GC--G-------AG-C-G-G-C-GG-A--C--G-GG-T-G-A-G-T-A--AC-A-C-G-T-G-GG---TAA-C-CT-G-C-C-CAA--GA-G-A-C-T--G-G-G---AT-AA-C--AC--C-T-G-G-A-A-A-----…
>H97X84I02GCGT4
G-A-T-G-A--A-C-G-C--T-A-G-C-G-G--C-A-G-G--C---C-T--AA-T--AC-A-T-G--C-A-A-G--T-C--GA-A-CG-A---------G-A----T-T--A----------------------------------T-C-C-A-G------------------------CTT-G------------------------------C--T--G-G-A-------------------------T-A----T--GA--A-------AG-T-G-G-C-GC-A--C--G-GG-T-G-C-G-T-A--AC-G-C-G-T-G-AG---CAA-C-CT-A-C-C-TCT--GT-C-A-G-G--G-G-G---AT-AG-C--CC--G-G-C-G-A-A-A-----…
>H97X84I02F4CM8
G-A-T-G-A--A-C-G-C--T-A-G-C-G-A--C-A-G-G--C---T-T--AA-C--AC-A-T-G--C-A-A-G--T-C--GA-G-GG-----------G-CAG--C-G--G----------------G--------------GT-A-G-G-A-AG-----------------------CTT-G----------------C-------------T--T--T-C-T-G--CC-----------------G-C-C----G--GC--G-------AC-C-G-G-C-GC-A--C--G-GG-T-G-A-G-T-A--AC-A-C-G-T-A-TG---CAA-C-CT-G-G-C-CGT--GA-C-A-G-A--T-G-G---AT-AA-C--CG--G-G-A-G-A-A-A-----…
>H97X84I02GOATW
A-T-T-G-A--A-C-G-C--T-G-G-C-G-G--C-A-T-G--C---C-T--TA-C--AC-A-T-G--C-A-A-G--T-C--GA-A-CG-----------G-TA-----A--C------------------------------------G-G-G--------------------------TCC-T------------------------------T--C--G-G-------------------------G-A-T----GCCGAC-G-------AG-T-G-G-C-GA-A--C--G-GG-T-G-A-G-T-A--AT-A-T-A-T-C-GG---A-A-C-GT-G-C-C-CAG--TA-G-T-G-G--G-G-G---AT-AA-C--TG--C-T-C-G-A-A-A-----…
>H97X84I02JQ1B0
G-A-T-G-A--A-C-G-C--T-A-G-C-G-G--G-A-G-G--C---C-T--AA-C--AC-A-T-G--C-A-A-G--C-C--GA-G-CG-G---------T-A----T-T--G------------------------------------T-T-T-C------------------------TTC-G------------------------------G--A--A-A---------------------------T-G----A--GA--G-------AG-C-G-G-C-GT-A--C--G-GG-T-G-C-G-G-A--AC-A-C-G-T-G-TG---CAA-C-CT-G-C-C-TTT--AT-C-T-G-G--G-G-G---AT-AG-C--CT--T-T-C-G-A-A-A-----…
>H97X84I02G9GMG
A-T-T-G-A--A-C-G-C--T-G-G-C-G-G--C-A-G-G--C---T-T--AA-C--AC-A-T-G--C-A-A-G--T-C--GA-G-CG-G---------A-G----A-T--G----------------------------------A-G-G-T-G------------------------CTT-G------------------------------C--A--C-C-T-------------------------T-A----T--CT--T-------AG-C-G-G-C-GG-A--C--G-GG-T-G-A-G-T-A--AT-G-C-T-T-A-GG---A-A-T-CT-G-C-C-TAT--TA-G-T-G-G--G-G-G---AC-AA-C--AT--T-C-C-G-A-A-A-----…
>H97X84I02IYIGC
G-A-T-G-A--A-C-G-C--T-A-G-C-G-A--C-A-G-G--C---T-T--AA-C--AC-A-T-G--C-A-A-G--T-C--GA-G-GG-----------G-CAG--C-G--G----------------G--------------GT-A-G-G-A-AG-----------------------CTT-G----------------C-------------T--T--T-C-T-G--CC-----------------G-C-C----G--GC--G-------AC-C-G-G-C-GC-A--C--G-GG-T-G-A-G-T-A--AC-A-C-G-T-A-TG---CAA-C-CT-G-G-C-CGT--GA-C-A-G-A--T-G-G---AT-AA-C--CG--G-G-A-G-A-A-A-----…
>H97X84I02GU2HT
G-A-T-G-A--A-C-G-C--T-A-G-C-G-A--C-A-G-G--C---T-T--AA-C--AC-A-T-G--C-A-A-G--T-C--GA-G-GG-----------G-CAG--C-G--G----------------G--------------GG-T-G-A-T-GG-----------------------CTT-G----------------C-------------C--A--T-C-A-C--CT-----------------G-C-C----G--GC--G-------AC-C-G-G-C-GC-A--C--G-GG-T-G-A-G-T-A--AC-A-C-G-T-A-TG---CAA-C-CT-G-C-C-CGC--CA-C-A-G-G--G-G-G---AT-AA-G--CG--G-A-A-G-A-A-A-----…
>H97X84I02G10RD
G-A-T-G-A--A-C-G-C--T-A-G-C-G-A--C-A-G-G--C---C-T--AA-C--AC-A-T-G--C-A-A-G--T-C--GA-G-GG-----------G-CAG--C-G--G----------------G--------------GAGC-G-A-A-G------------------------CTT-G------------------------------C--T--T-TGC-T--CC-----------------G-C-C----G--GC--G-------AC-C-G-G-C-GC-A--C--G-GG-T-G-A-G-T-A--AC-G-C-G-T-A-TG---CAA-C-CT-G-C-C-CGT--TT-C-A-G-C--G-G-G---AT-AA-C--CC--G-G-A-G-A-A-A-----…
>H97X84I02FH5Y4
G-A-T-G-A--A-C-G-C--T-G-G-C-G-G--C-G-T-G--C---C-T--AA-C--AC-A-T-G--C-A-A-G--T-C--GA-A-CG-------------G------A--C----------TT-AA-AT-------------TG-A-A---A-C------------------------CT--A------------------------------G-----T---G-A--A------GT------------T-T----AA-GT--T-------AG-T-G-G-C-GG-A--C--G-GG-T-G-A-G-T-A--AC-G-C-G-T-G-GA---TAA-C-CT-G-C-C-GTA--TG-C-A-G-G--G-G-G---AT-AC-C--AA--C-T-G-G-A-A-A-----…
>H97X84I02HSQB5
A-T-T-G-G--A-C-G-C--T-G-G-C-G-G--C-A-T-G--C---C-T--TA-C--AC-A-T-G--C-A-A-G--T-C--GA-A-CG-----------G-CAG--C-A--C------------------------------------G-G-A-C------------------------TTC-G------------------------------G--T--C-T-------------------------G-G-T----G--GC--G-------AG-T-G-G-C-GA-A--C--G-GG-T-G-A-G-T-A--AT-G-T-A-T-C-GG---A-A-C-GT-A-C-C-TTT--CA-G-T-G-G--G-G-G---AT-AA-C--GT--A-G-C-G-A-A-A-----…
>H97X84I02GALIA
G-A-T-G-A--A-C-G-C--T-G-G-C-G-G--C-G-T-G--C---C-T--AA-C--AC-A-T-G--C-A-A-G--T-C--GA-A-CG-G---------G-G------T--A---TATA-------A-G--------------CGGA-A-G-T-T------------------------TAC-G------------------------------G--A--T-G-G-A--AGGT------TAT-A------T-A-------CC--C-------AG-T-G-G-C-GG-A--C--G-GG-T-G-A-G-T-A--AC-G-C-G-T-G-AG---CAA-C-CT-G-C-C-CCG--TG-C-C-G-G--G-G-G---AT-AC-C--GC--C-T-G-G-A-A-A-----…
>H97X84I02IEBKD
G-A-T-G-A--A-C-G-C--T-G-G-C-G-G--C-G-T-G--C---T-T--AA-C--AC-A-T-G--C-A-A-G--T-C--GAACGGGGG---------T-GC---C-A--T--------GAACGAAGC-------------ATC-A-G-T-T--------------------------TAC-T------------------------------G--A--TAT-G-G--AG---GGAAT-----------G-G----GACCC--T-------AG-T-G-G-C-GG-A--C--G-GG-T-G-A-G-T-A--AC-G-C-G-T-G-GG---TAA-C-CT-G-C-C-CCA--TA-C-C-G-G--G-G-G---AT-AA-C--AC--T-T-A-G-A-A-A-----…
>H97X84I02HH0KS
A-T-T-G-A--A-C-G-C--T-G-G-C-G-G--C-A-T-G--C---C-T--TA-C--AC-A-T-G--C-A-A-G--T-C--GA-A-CG-----------G-CAG--C-A--C----------------------------------G-G-G-T-G------------------------CTT-G------------------------------C--A--C-C-T-----------------------G-G-T----G--GC--G-------AG-T-G-G-C-GA-A--C--G-GG-T-G-A-G-T-A--AT-A-C-A-T-C-GG---A-A-C-AT-G-T-C-CTG--TA-G-T-G-G--G-G-G---AT-AG-C--CC--G-G-C-G-A-A-A-----…
>H97X84I02J4DCH
G-A-T-G-A--A-C-G-C--T-A-G-C-G-A--C-A-G-G--C---T-T--AA-C--AC-A-T-G--C-A-A-G--T-C--GA-G-GG-----------G-CAG--C-G--G----------------G-------------GTA-G-G-A-A--------------------------GC--T---------------------------------T--G-CTT-T--CTGCC--------------G-C-C----G--GC--G-------AC-C-G-G-C-GC-A--C--G-GG-T-G-A-G-T-A--AC-A-C-G-T-A-TG---AAA-C-CT-G-C-C-CGT--AG-C-A-G-G--G-G-G---AT-AA-G--CG--G-A-A-G-A-A-A-----…
>H97X84I02HHP9Q
G-A-T-G-A--A-C-G-C--T-A-G-C-G-A--C-A-G-G--C---T-T--AA-C--AC-A-T-G--C-A-A-G--T-C--GA-G-GG-----------G-CAG--C-G--G----------------G--------------GT-A-G-G-A-AG-----------------------CTT-G----------------C-------------T--T--T-C-T-G--CC-----------------G-C-C----G--GC--G-------AC-C-G-G-C-GC-A--C--G-GG-T-G-A-G-T-A--AC-A-C-G-T-A-TG---CAA-C-CT-G-C-C-CCT--GT-C-A-G-G--G-G-G---AC-AA-C--CC--A-C-C-G-A-A-A-----…
>H97X84I02FSWGG
G-A-C-G-A--A-C-G-C--T-G-G-C-G-G--C-G-T-G--C---C-T--AA-T--AC-A-T-G--C-A-A-G--T-C--GA-A-CG-A---------G-A--------------------------------------------------C-C------------------------TTC-G------------------------------G--G------------------------------------------TC--T-------AG-T-G-G-C-GC-A--C--G-GG-T-G-C-G-T-A--AC-G-C-G-T-G-GG---A-A-T-CT-G-C-C-CTT--GG-G-T-T-C--G-G-A---AT-AA-C--TC--G-C-C-G-A-A-A-----…
>H97X84I02JCWB7
A-T-T-G-A--A-C-G-C--T-G-G-C-G-G--C-A-T-G--C---C-T--TA-C--AC-A-T-G--C-A-A-G--T-C--GA-A-CG-----------G-TAA--C-A--G--------------------------------------G-T-C------------------------TTC-G------------------------------G--A--T---------------------------G-C-T----G--AC--G-------AG-T-G-G-C-GA-A--C--G-GG-T-G-A-G-T-A--AT-A-C-A-T-C-GG---A-A-C-GT-G-C-C-CGA--GA-G-T-G-G--G-G-G---AT-AA-C--GA--G-G-C-G-A-A-A-----…
>H97X84I02F84MX
G-A-T-G-A--A-C-G-C--T-A-G-C-G-G--C-A-G-G--C---T-T--AA-C--AC-A-T-G--C-A-A-G--T-C--GC-G-GG-----------G-CAG--CGG--G----------------G--------------GA-T-G---A--------------------------GC--T---------------------------------T--G-CTCATC-CC-----------------G-C-C----G--GC--G-------AC-C-G-G-C-GC-A--C--G-GG-T-G-A-G-T-A--AC-A-C-G-T-A-TG---AAA-C-CT-G-C-C-CGT--AG-C-A-G-G--G-G-G---AT-AA-G--CG--G-A-A-G-A-A-A-----…
>H97X84I02IAY3V
G-A-T-G-A--A-C-G-C--T-G-G-C-G-G--C-G-T-G--C---T-T--AA-C--AC-A-T-G--C-A-A-G--T-C--GA-A-CG-G---------G-G----G-C--G----------TGATG-T--------------GC-G-A-G-A-GGGATA-------------------GTT--------------TACTAG------------AC-T--TCA-A-A--CTT--TTCA------------C-G----C--CC--T-------AG-T-G-G-C-GG-A--C--G-GG-T-G-A-G-T-A--AC-G-C-G-T-G-GG---TAA-C-CT-G-C-C-ATA--TA-C-A-G-G--G-G-G---AT-AA-C--AC--T-T-A-G-A-A-A-----…
>H97X84I02HD51E
G-A-T-G-A--A-C-G-C--T-A-G-C-G-G--C-A-G-G--C---T-T--AA-C--AC-A-T-G--C-A-A-G--T-C--GA-G-GG-----------G-CAG--C-G--G----------------G--------------GAGC-G-A-A-G------------------------CTT-G------------------------------C--T--T-TGC-T--CC-----------------G-C-C----G--GC--G-------AC-C-G-G-C-GC-A--C--G-GG-T-G-A-G-T-A--AC-G-C-G-T-A-TG---CAA-C-CT-G-C-C-CGT--TT-C-A-G-C--G-G-G---AT-AA-C--CC--G-G-A-G-A-A-A-----…
>H97X84I02GXC21
G-A-C-G-A--A-C-G-C--T-G-G-C-G-G--C-G-T-G--C---T-T--AA-C--AC-A-T-G--C-A-A-G--T-C--GA-A-CG-----------G-AA---A-G--G--------------------------------C-C---T-C-T------------------------TTC-G------------------------------G--G--G---G-G-----------------------T-A----C--TC--G-------AG-T-G-G-C-GA-A--C--G-GG-T-G-A-G-T-A--AC-A-C-G-T-G-AG---TAA-C-CT-G-C-C-CTT--GA-C-T-T-T--G-G-G---AT-AA-C--TT--C-A-G-G-A-A-A-----…
>H97X84I02GF9VY
G-A-T-G-A--A-C-G-C--T-A-G-C-G-G--C-A-G-G--C---T-T--AA-C--AC-A-T-G--C-A-A-G--T-C--GC-G-GG-----------G-CAG--C-G--G----------------GA-------------GA-T-G-A----G-----------------------CTT-G----------------CT------------C--A--T-C---C--C------------------G-C-C----G--GC--G-------AC-C-G-G-C-GC-A--C--G-GG-T-G-A-G-T-A--AC-A-C-G-T-A-TG---CAA-C-CT-G-C-C-CCT--GT-C-A-G-G--G-G-G---AC-AA-C--CC--A-C-C-G-A-A-A-----…
>H97X84I02FRIYU
G-A-T-G-A--A-C-G-C--T-A-G-C-G-A--C-A-G-G--C---T-T--AA-C--AC-A-T-G--C-A-A-G--T-C--GA-A-CG-A---------G-A--------------------------------------------------C-C------------------------TTC-G------------------------------G--G------------------------------------------TC--T-------AG-T-G-G-C-GC-A--C--G-GG-T-G-C-G-T-A--AC-G-C-G-T-G-GG---A-A-T-CT-G-C-C-CTT--GG-G-T-T-C--G-G-A---AT-AA-C--TC--G-C-C-G-A-A-A-----…
>H97X84I02IUTXG
A-A-C-G-A--A-C-G-C--T-G-G-C-G-G--C-A-G-G--C---C-T--AA-T--AC-A-T-G--C-A-A-G--T-C--GA-A-CG-A---------G-A----T-T--A----------------------------------T-C-C-A-G------------------------CTT-G------------------------------C--T--G-G-A-------------------------T-A----T--GA--A-------AG-T-G-G-C-GC-A--C--G-GG-T-G-C-G-T-A--AC-G-C-G-T-G-AG---CAA-C-CT-A-C-C-TCT--GT-C-A-G-G--G-G-G---AT-AG-C--CC--G-G-C-G-A-A-A-----…
>H97X84I02IH1RA
G-A-T-G-A--A-C-G-C--T-G-G-C-G-G--C-G-T-G--C---T-T--AA-C--AC-A-T-G--C-A-A-G--T-C--GA-G-CG-A---------A-G----C-A-------------TAAAAGA--------------GG-A-A-G-T-T------------------------TT--A------------------------------A--A--T-G-G-A--ATC--GATT------------A-T----GA-CT--G-------AG-C-G-G-C-GG-A--C--G-GG-T-G-A-G-T-A--AC-G-C-G-T-G-GG---GAA-C-CT-G-C-C-CTA--TA-C-A-G-G--G-G-G---AT-AA-C--AG--T-T-A-G-A-A-A-----…
>H97X84I02I1DIF
G-A-T-G-A--A-C-G-C--T-G-G-C-G-G--C-G-T-G--C---C-T--AA-C--AC-A-T-G--C-A-A-G--T-C--GA-A-CG-G---------G-G----T-A--T---------ATAAG-----------------CG-G-A-A-G-T------------------------TTACG------------------------------GA-T--G-G-A-A--G-G--T-TAT-----------A-T----A--CT--T-------AG-T-G-G-C-GG-A--C--G-GG-T-G-A-G-T-A--AC-G-C-G-T-G-GG---CAA-C-CT-G-C-C-CCG--TG-C-C-G-G--G-G-G---AT-AC-C--GC--C-T-G-G-A-A-A----C…
>H97X84I02H6S27
G-A-T-G-A--A-C-G-C--T-A-G-C-G-A--C-A-G-G--C---T-T--AA-C--AC-A-T-G--C-A-A-G--T-C--GA-G-GG-----------G-CAG--C-G--G----------------G--------------GT-A-G-G-A-AG-----------------------CTT-G----------------C-------------T--T--T-C-T-G--CC-----------------G-C-C----G--GC--G-------AC-C-G-G-C-GC-A--C--G-GG-T-G-A-G-T-A--AC-A-C-G-T-A-TG---CAA-C-CT-G-C-C-CGC--CA-C-A-G-G--G-G-G---AT-AA-G--CG--G-A-A-G-A-A-A-----…
>H97X84I02GBOFT
G-A-T-G-A--A-C-G-C--T-A-G-C-G-A--C-A-G-G--C---T-T--AA-C--AC-A-T-G--C-A-A-G--T-C--GA-G-GG-----------G-CAG--C-G--G----------------G--------------GG-A-G---T-AG-----------------------CAA-T----------------A-------------C-----T-C---C--C------------------G-C-C----G--GC--G-------AC-C-G-G-C-GC-A--C--G-GG-T-G-A-G-T-A--AC-A-C-G-T-A-TG---AAA-C-CT-G-C-C-CGT--AG-C-A-G-G--G-G-G---AT-AA-G--CG--G-A-A-G-A-A-A-----…
>H97X84I02HCND8
G-A-T-G-A--A-C-G-C--T-A-G-C-G-A--C-A-G-G--C---C-T--AA-C--AC-A-T-G--C-A-A-G--T-C--GA-G-GG-----------G-CAA--C-G--G----------------G--------------G--A-GCG-A-AG-----------------------CTT-G----------------C-------------T--T--TGC-T----CC-----------------G-C-C----G--GC--G-------AC-C-G-G-C-GC-A--C--G-GG-T-G-A-G-T-A--AC-G-C-G-T-A-TG---CAA-C-CT-G-C-C-CGT--TT-C-A-G-C--G-G-G---AT-AA-C--CC--G-G-A-G-A-A-A-----…
>H97X84I02HBC70
G-A-C-G-A--A-C-G-C--T-G-G-C-G-G--C-G-T-G--C---C-T--AA-T--AC-A-T-G--C-A-A-G--T-C--GA-G-CG-A---------G-C----C-A--A-------------------------------TA-A-G-A-A-G------------------------CTT-G------------------------------C--T--T-T-T-T--G--------------------T-T----G--GT--T-------AG-C-G-G-C-GG-A--C--G-GG-T-G-A-G-T-A--AC-A-C-G-T-G-GG---TAA-C-CT-G-C-C-TGT--AA-G-A-C-C--G-G-G---AT-AA-C--TC--C-G-G-G-A-A-A-----…
>H97X84I02GQLJ5
G-ATT-G-A--A-C-G-C--T-A-G-C-G-G--G-A-T-G--C---T-T--AA-C--AC-A-T-G--C-A-A-G--T-C--GC-G-GG-----------G-CAG--C-G--G----------------G--------------GGAT-G-A----G-----------------------CTT-G----------------CT------------C--A--T-C---C--C------------------G-C-C----G--GC--G-------AC-C-G-G-C-GC-A--C--G-GG-T-G-A-G-T-A--AC-A-C-G-T-A-TG---CAA-C-CT-G-C-C-CCT--GT-C-A-G-G--G-G-G---AC-AA-C--CC--A-C-C-G-A-A-A-----…
>H97X84I02GPBH2
A-T-T-G-A--A-C-G-C--T-A-G-C-G-G--G-A-T-G--C---T-T--TA-C--AC-A-T-G--C-A-A-G--T-C--GA-A-CG-----------G-CAG--C-G--C------------------------------------G-G-A-C------------------------TTC-G------------------------------G--T--C-T-------------------------G-G-C----G--GC--G-------AG-T-G-G-C-GA-A--C--G-GG-T-G-A-G-T-A--AT-G-T-A-T-C-GG---A-A-C-GT-A-C-C-TTT--CA-G-T-G-G--G-G-G---AT-AA-C--GT--A-G-C-G-A-A-A-----…
>H97X84I02FJDH0
G-A-T-G-A--A-C-G-C--T-A-G-C-G-A--C-A-G-G--C---T-T--AA-C--AC-A-T-G--C-A-A-G--T-C--GA-G-GG-----------G-CAG--C-G--G----------------G--------------GG-A-G---T-AG-----------------------CAA-T----------------A-------------C-----T-C---C--C------------------G-C-C----G--GC--G-------AC-C-G-G-C-GC-A--C--G-GG-T-G-A-G-T-A--AC-A-C-G-T-A-TG---CAA-C-CT-G-C-C-CCT--GT-C-A-G-G--G-G-G---AC-AA-C--CC--A-C-C-G-A-A-A-----…
>H97X84I02ICVXG
G-A-T-G-A--A-C-G-C--T-A-G-C-G-A--C-A-G-G--C---T-T--AA-C--AC-A-T-G--C-A-A-G--T-C--GA-G-GG-----------G-CAG--C-G--G----------------G--------------GG-A-G---T-AG-----------------------CAA-T----------------A-------------C-----T-C---C--C------------------G-C-C----G--GC--G-------AC-C-G-G-C-GC-A--C--G-GG-T-G-A-G-T-A--AC-A-C-G-T-A-TG---CAA-C-CT-G-C-C-CGC--CA-C-A-G-G--G-G-G---AT-AA-G--CG--G-A-A-G-A-A-A-----…
>H97X84I02FJ13J
A-T-T-G-A--A-C-G-C--T-G-G-C-G-G--C-A-T-G--C---C-T--TA-C--AC-A-T-G--C-A-A-G--T-C--GA-A-CG-----------G-TA-----A--C----------------------------------A-G-G-T--------------------------CTT--------------------------------C--G--G-A-T-----------------------G-C-T----G--AC--G-------AG-T-G-G-C-GA-A--C--G-GG-T-G-A-G-T-A--AT-A-C-A-T-C-GG---A-A-C-GT-G-C-C-CGA--TC-G-T-G-G--G-G-G---AT-AA-C--GA--G-G-C-G-A-A-A-----…
>H97X84I02GS8QJ
G-A-T-G-A--A-C-G-C--T-A-G-C-G-A--C-A-G-G--C---T-T--AA-C--AC-A-T-G--C-A-A-G--T-C--GA-G-GG-----------G-CAG--C-G--G----------------G--------------GT-A-G-G-A-AG-----------------------CTT-G----------------C-------------T--T--T-C-T-G--CC-----------------G-C-C----G--GC--G-------AC-C-G-G-C-GC-A--C--G-GG-T-G-A-G-T-A--AC-A-C-G-T-A-TG---CAA-C-CT-G-C-C-CGT--TT-C-A-G-C--G-G-G---AT-AA-C--CC--G-G-A-G-A-A-A-----…
>H97X84I02I7UMT
A---T-G-A--A-C-G-C--T-A-G-C-G-G--C-A-G-G--C---T-T--AA-C--AC-A-T-G--C-A-A-G--T-C--GC-G-GG-----------G-CAG--CGG--G------------------------------------G-GATGAGCTT--------------------GCTCA------------------------------T--C--C-C-------------------------G-C-C----G--GC--G-------AC-C-G-G-C-GC-A--C--G-GG-T-G-A-G-T-A--AT-A-T-A-T-C-GG---A-A-C-GT-G-C-C-CAG--TA-G-T-G-G--G-G-G---AT-AA-C--TG--C-T-C-G-A-A-A-----…
>H97X84I02IYTXT
G-A-T-G-A--A-C-G-C--T-A-G-C-G-G--C-A-G-G--C---T-T--AA-C--AC-A-T-G--C-A-A-G--T-C--GC-G-GG-----------G-CAG--C-G--G----------------G--------------GG-A-T-G---AG-----------------------CTT-G----------------C----------------T--C-A-T-C--CC-----------------G-C-C----G--GC--G-------AC-C-G-G-C-GC-A--C--G-GG-T-G-A-G-T-A--AC-A-C-G-T-A-TG---CAA-C-CT-G-C-C-CCT--GT-C-A-G-G--G-G-G---AC-AA-C--CC--A-C-C-G-A-A-A-----…
>H97X84I02IKRBT
G-A-T-G-A--A-C-G-C--T-G-G-C-G-G--C-A-T-G--C---C-T--AA-C--AC-A-T-G--T-A-A-G--T-C--GA-A-CG-A---------G-A--------------------------------------------------C-C------------------------TTC-G------------------------------G--G------------------------------------------TC--T-------AG-T-G-G-C-GC-A--C--G-GG-T-G-C-G-T-A--AC-G-C-G-T-G-GG---A-A-T-CT-G-C-C-CTT--GG-G-T-T-C--G-G-A---AT-AA-C--TC--G-C-C-G-A-A-A-----…
>H97X84I02IDR2S
G-A-T-G-A--A-C-G-C--T-A-G-C-G-A--C-A-G-G--C---C-T--AA-C--AC-A-T-G--C-A-A-G--T-C--GA-G-GG-----------G-CAG--C-G--G----------------G--------------GAGC-G-A-A-G------------------------CTT-G------------------------------C--T--T-TGC-T--CC-----------------G-C-C----G--GC--G-------AC-C-G-G-C-GC-A--C--G-GG-T-G-A-G-T-A--AC-G-C-G-T-A-TG---CAA-C-CT-G-C-C-CGT--TT-C-A-G-C--G-G-G---AT-AA-C--CC--G-G-A-G-G-A-A-----…
>H97X84I02I3UJ7
A-T-T-G-A--A-C-G-C--T-A-G-C-G-G--G-A-T-G--C---T-T--TA-C--AC-A-T-G--C-A-A-G--T-C--GA-A-CG-----------G-CAG--C-G--C----------------G-----------------G-----A--------------------------CTT--------------------------------C--G--G-T-C-----T-----------------G-G-C----G--GC--G-------AG-T-G-G-C-GA-A--C--G-GG-T-G-A-G-T-A--AT-G-T-A-T-C-GG---A-A-C-GT-G-C-C-CAG--TA-G-C-G-G--G-G-G---AT-AA-C--TA--C-G-C-G-A-A-A-----…
>H97X84I02HRNR5
A-T-T-G-A--A-C-G-C--T-G-G-C-G-G--C-A-T-G--C---C-T--TA-C--AC-A-T-G--C-A-A-G--T-C--GA-A-CG-----------G-TAA--C-A--G--------------------------------------G-T-C------------------------TTC-G------------------------------G--A--T---------------------------G-C-T----G--AC--G-------AG-T-G-G-C-GA-A--C--G-GG-T-G-A-G-T-A--AT-A-C-A-T-C-GG---A-A-C-GT-G-C-C-C-G-ATC-G-T-G-G--G-G-G---AT-AA-C--GA--G-G-C-G-A-A-A-----…
>H97X84I02HMTUB
G-A-C-G-A--A-C-G-C--T-G-G-C-G-G--C-G-T-G--C---T-T--AA-C--AC-A-T-G--C-A-A-G--T-C--GA-ACGG-A---------G-T----A----C----------CCTCG-A--------------AA-G-A-G-A-T------------------------TTC-G------------------------------G--T--C-A-A-T--GG---AGAG------------G-A----C--TA--CTT-----AG-T-G-G-C-GG-A--C--G-GG-T-G-A-G-T-A--AC-G-C-G-T-G-AG---GAA-C-CT-G-C-C-TTT--CA-G-T-G-G--G-G-G---AC-AA-C--AG--T-T-G-G-A-A-A-----…
>H97X84I02H8LB9
G-A-T-G-A--A-C-G-C--T-A-G-C-G-G--C-A-G-G--C---T-T--AA-C--AC-A-T-G--C-A-A-G--T-C--GC-G-GG-----------G-CAG--C-G--G----------------G--------------GGAT-G-A----G-----------------------CTT-G----------------CT------------C--A--T-C---C--C------------------G-C-C----G--GC--G-------AC-C-G-G-C-GC-A--C--G-GG-T-G-A-G-T-A--AC-A-C-G-T-A-TG---CAA-C-CT-G-C-T-CCT--GT-C-A-G-G--G-G-G---AC-AA-C--CC--A-C-C-G-A-A-AG----…
>H97X84I02GTBFX
G-A-T-G-A--A-C-G-C--T-G-G-C-G-G--C-G-T-G--C---T-T--AA-C--AC-A-T-G--C-A-A-G--T-C--GA-ACGG-G---------G-GT---G-C--C--------ATGAACGAA-------------GCA---TCAGT-T------------------------TAC-T------------------------------G--AT-A---T-G--GAG--GGAAT-----------G-G----GACCC--T-------AG-T-G-G-C-GG-A--C--G-GG-T-G-A-G-T-A--AC-G-C-G-T-G-GG---TAA-C-CT-G-C-C-CCA--TA-C-C-G-G--G-G-G---AT-AA-C--AC--T-T-A-G-A-A-A-----…
>H97X84I02GOZB0
G-A-T-G-A--A-C-G-C--T-A-G-C-G-A--C-A-G-G--C---T-T--AA-C--AC-A-T-G--C-A-A-G--T-C--GA-G-GG-----------G-CAG--C-GA-G----------------G--------------GA---G-T-A--------------------------GCA-A---------------------------------T--A-C-T-C--CC-----------------G-C-C----G--GC--G-------AC-C-G-G-C-GC-A--C--G-GG-T-G-A-G-T-A--AC-A-C-G-T-A-TG---AAA-C-CT-G-C-C-CGT--AG-C-A-G-G--G-G-G---AT-AA-G--CG--G-A-A-G-A-A-A-----…
>H97X84I02GMR6N
A-A-C-G-A--A-C-G-C--T-G-G-C-G-G--C-A-T-G--C---C-T--AA-C--AC-A-T-G--C-A-A-G--T-C--GA-A-CG-----------G-AA---A-G--G--------------------------------C-C---T-C-T------------------------TTC-G------------------------------G--G--G---G-G-----------------------T-A----C--TC--G-------AG-T-G-G-C-GA-A--C--G-GG-T-G-A-G-T-A--AC-A-C-G-T-G-AG---TAA-C-CT-G-C-C-CTC--GA-C-T-T-T--G-G-G---AT-AA-C--TT--C-A-G-G-A-A-A-----…
>H97X84I02H2EO3
A-T-T-G-A--A-C-G-C--T-A-G-C-G-G--G-A-T-G--C---T-T--TA-C--AC-A-T-G--C-A-A-G--T-C--GA-A-CG-----------G-CAG--C-G--C------------------------------------G-GAC-T------------------------TCG-G------------------------------T-----C-T-------------------------G-G-C----G--GC--G-------AG-T-G-G-C-GA-A--C--G-GG-T-G-A-G-T-A--AT-A-T-A-T-C-GG---A-A-C-GT-G-C-C-CAG--TA-G-T-G-G--G-G-G---AT-AA-C--TG--C-T-C-G-A-A-A-----…
>H97X84I02GFTW8
G-A-T-G-A--A-C-G-C--T-G-G-C-G-G--C-G-T-G--C---T-T--AA-C--AC-A-T-G--C-A-A-G--T-C--GA-A-CG-G---------AGT----A-A--A--------------GATT-------------TT-G-A-T-T-T------------------------CTA-A------------------------------CG-A--T-TGAGAGGTCT------------------T-T----A--CT--T-------AG-T-G-G-C-GG-A--C--G-GG-T-G-A-G-T-A--AC-G-C-G-T-G-GA---TAA-C-CT-G-C-C-CCA--TA-C-C-G-G--G-G-G---AT-AA-C--AG--C-C-G-G-A-A-A-----…
>H97X84I02GCOCK
G-A-T-G-A--A-C-G-C--T-A-G-C-G-A--C-A-G-G--C---T-T--AA-C--AC-A-T-G--C-A-A-A--T-C--GA-G-GG-----------G-CAG--C-G--G----------------G--------------GG-A-G-T-A--------------------------GCA-A---------------------------------T--A-C-T-C--CC-----------------G-C-C----G--GC--G-------AC-C-G-G-C-GC-A--C--G-GG-T-G-A-G-T-A--AC-A-C-G-T-A-TG---AAA-C-CT-G-C-C-CGT--AG-C-A-G-G--G-G-G---AT-AA-G--CG--G-A-A-G-A-A-A-----…
>H97X84I02IZS40
G-A-T-G-A--A-C-G-C--T-A-G-C-G-G--C-A-G-G--C---T-T--AA-C--AC-A-T-G--C-A-A-G--T-C--GC-G-GG-----------G-CAG--C-G--G----------------G--------------GG-A-T-G---AG-----------------------CTT-G----------------C----------------T--C-A-T-C--CC-----------------G-C-C----G--GC--G-------AC-C-G-G-C-GC-A--C--G-GG-T-G-A-G-T-A--AC-A-C-G-T-A-TG---CAA-C-CT-G-G-C-CGT--GA-C-A-G-A--T-G-G---AT-AA-C--CG--G-G-A-G-A-A-A-----…
>H97X84I02GB1Z6
A-A-C-G-A--A-C-G-C--T-G-G-C-G-G--C-A-C-G--C---C-T--AA-C--AC-A-T-G--T-A-A-G--T-C--GA-A-CG-A---------G-A--------------------------------------------------C-C------------------------TTC-G------------------------------G--G------------------------------------------TC--T-------AG-T-G-G-C-GC-A--C--G-GG-T-G-G-G-T-A--AC-G-C-G-T-G-GG---A-A-T-CT-G-C-C-CTT--GG-G-T-T-C--G-G-A---AT-AA-C--TC--G-C-C-G-A-A-A-----…
>H97X84I02GI6C8
G-A-T-G-A--A-C-G-C--T-A-G-C-G-A--C-A-G-G--C---T-T--AA-C--AT-A-T-G--C-A-A-GTCGCGGGGCAGCGGGGGAT------G-AG-----------------------------------------------CTTGC---------------------TCATCCCGC-----------------------------C--G------------------------------------------GC--G-------AC-C-G-G-C-GC-A--C--G-GG-T-G-A-G-T-A--AC-G-C-G-T-G-GG---A-A-T-CT-G-C-C-CTT--GG-G-T-T-C--G-G-A---AT-AA-C--TC--G-C-C-G-A-A-A-----…
>H97X84I02G3GM3
G-A-T-G-A--A-C-G-C--T-A-G-C-G-G--C-A-G-G--C---T-T--AA-C--AC-A-T-G--C-A-A-G--T-C--GC-G-GG-----------G-CAG--C-G--G----------------G--------------GGAT-G-A----G-----------------------CTT-G----------------CT------------C--A--T-C---C--C------------------G-C-C----G--GC--G-------AC-C-G-G-C-GC-A--C--G-GG-T-G-A-G-T-A--AC-A-C-G-T-A-TG---CAA-C-CT-G-C-C-CCT--GT-C-A-G-G--G-G-G---AC-AA-C--CC--A-C-C-G-A-A-A-----…
>H97X84I02G0P2K
A-A-C-G-A--A-C-G-C--T-G-G-C-G-G--C-A-T-G--C---C-T--AA-C--AC-A-T-G--C-A-A-G--T-C--GC-G-GG-----------G-CAG--CGG--G----------------G--------------GA-T-G---A--------------------------GC--T---------------------------------T--G-CTCATC-CC-----------------G-C-C----G--GC--G-------AC-C-G-G-C-GC-A--C--G-GG-T-G-A-G-T-A--AC-A-C-G-T-A-TG---AAA-C-CT-G-C-C-CGT--AG-C-A-G-G--G-G-G---AT-AA-G--CG--G-A-A-G-A-A-A-----…
>H97X84I02FMZ8Y
G-A-C-G-A--A-C-G-C--T-G-G-C-G-G--C-G-T-G--C---T-T--AA-C--AC-A-T-G--C-A-A-G--T-C--GA-ACGG-A---------G-T----A----C----------CCTCG-A--------------AA-G-A-G-A-T------------------------TTC-G------------------------------G--T--C-A-A-T--GG---AGAG------------G-A----C--TA--CTT-----AG-T-G-G-C-GG-A--C--G-GG-T-G-A-G-T-A--AC-G-C-G-T-G-AG---GAA-C-CT-G-C-C-TTT--CA-G-A-G-G--G-G-G---AC-AA-C--AG--T-T-G-G-A-A-A-----…
>H97X84I02HX0UC
A-T-T-G-A--A-C-G-C--T-G-G-C-G-G--C-A-T-G--C---C-T--TA-C--AC-A-T-G--C-A-A-G--T-C--GA-A-CG-----------G-TAA--CGG--G----------------------------------------TCC------------------------TTCGG------------------------------G--A--T---------------------------G-C-C----G--AC--G-------AG-T-G-G-C-GA-A--C--G-GG-T-G-A-G-T-A--AT-A-T-A-T-C-GG---A-A-C-GT-G-C-C-CGA--TC-G-T-G-G--G-G-G---AT-AA-C--GA--G-G-C-G-A-A-A-----…
>H97X84I02G60VY
G-A-T-G-A--A-C-G-C--T-A-G-C-G-A--C-A-G-G--C---T-T--AA-C--AC-A-T-G--C-A-A-G--T-C--GA-G-GG-----------G-CAG--C-G--G----------------G--------------GG-T-G-A-T-GG-----------------------CTT-G----------------C-------------C--A--T-C-A-C--CT-----------------G-C-C----G--GC--G-------AC-C-G-G-C-GC-A--C--G-GG-T-G-A-G-T-A--AC-A-C-G-T-A-TG---CAA-C-CT-G-C-C-CGC--AG-C-A-G-G--G-G-G---AT-AA-G--CG--G-A-A-G-A-A-A-----…
>H97X84I02J4AS6
G-A-T-G-A--A-C-G-C--T-A-G-C-G-G--C-A-G-G--C---C-T--AA-T--AC-A-T-G--C-A-A-G--T-C--GA-A-CG-A-------GATTATC------------------------------------------------CAGC----------------------TTGCTG------------------------------G--A------------------------------------------TA--TGAA----AG-T-G-G-C-GC-A--C--G-GG-T-G-C-G-T-A--AC-G-C-G-T-G-GG---A-A-T-CT-G-C-C-CTT--GG-G-T-T-C--G-G-A---AT-AA-C--TC--G-C-C-G-A-A-A-----…
>H97X84I02GIOV7
G-A-C-G-A--A-C-G-C--T-G-G-C-G-G--C-G-T-G--C---C-T--AA-T--AC-A-T-G--C-A-A-G--T-C--GA-G-CG-A---------------------A---CC-A---AT-A------------------A-G-A---A-G------------------------CTT-G------------------------------------C-T-------T-------TTTG------T---T----G--GT--T-------AG-C-G-G-C-GG-A--C--G-GG-T-G-A-G-T-A--AC-A-C-G-T-G-GG---TAA-C-CT-G-C-C-CAA--GA-G-A-C-T--G-G-G---AT-AA-C--AC--C-T-G-G-A-A-A-----…
>H97X84I02JYG5D
A---T-G-A--A-C-G-C--T-A-G-C-G-A--C-A-G-G--C---T-T--AA-C--AC-A-T-G--C-A-A-G--T-C--GA-A-CG-----------G-CAG--C-A--C------------------------------------G-G-A-C------------------------TTC-G------------------------------G--T--C-T-------------------------G-G-T----G--GC--G-------AG-T-G-G-C-GA-A--C--G-GG-T-G-A-G-T-A--AT-G-T-A-T-C-GG---A-A-C-GT-A-C-C-TTT--CA-G-T-G-G--G-G-G---AT-AA-C--GT--A-G-C-G-A-A-A-----…
>H97X84I02JY8GH
G-A-T-G-A--A-C-G-C--T-A-G-C-G-G--C-A-G-G--C---T-T--AA-C--AC-A-T-G--C-A-A-G--T-C--GC-G-GG-----------G-CAG--C-G--G----------------G--------------GGAT-G-A----G-----------------------CTT-G----------------CT------------C--A--T-C---C--C------------------G-C-C----G--GC--G-------AC-C-G-G-C-GC-A--C--G-GG-T-G-A-G-T-A--AC-A-C-G-T-A-TG---AAA-C-CT-G-C-C-CGT--AG-C-A-G-G--G-G-G---AT-AA-G--CG--G-A-A-G-A-A-A-----…
>H97X84I02JXPJM
G-A-C-G-A--A-C-G-C--T-G-G-C-G-G--C-G-T-G--C---T-T--AA-C--CC-A-T-G--C-A-A-G--T-C--GA-ACGG-A---------G-T----A----C----------CCTCG-A--------------AA-G-A-G-A-T------------------------TTC-G------------------------------G--T--C-A-A----TGA--AGAG------------G-A----C--TA--CTT-----AG-T-G-G-C-GG-A--C--G-GG-T-G-A-G-T-A--AC-G-C-G-T-G-AG---GAA-C-CT-G-C-C-TTC--CA-G-T-G-G--G-G-G---AC-AA-C--AG--T-T-G-G-A-A-A-----…
>H97X84I02JMP7J
G-A-T-G-A--A-C-G-C--T-A-G-C-G-A--C-A-G-G--C---T-T--AA-C--AC-A-T-G--C-A-A-G--T-C--GA-G-GG-----------G-CAG--C-G--G----------------G--------------GG-T-G-A-T-GG-----------------------CTT-G----------------C-------------C--A--T-C-A-C--CT-----------------G-C-C----G--GC--G-------AC-C-G-G-C-GC-A--C--G-GG-T-G-A-G-T-A--AC-A-C-G-T-A-TG---CAA-C-CT-G-C-C-CCT--GT-C-A-G-G--G-G-G---AC-AA-C--CC--A-C-C-G-A-A-A-----…
>H97X84I02JO1NC
A-A-C-G-A--A-C-G-C--T-G-G-C-G-G--C-A-T-G--C---C-C--AA-C--AC-A-T-G--C-A-A-G--T-C--GA-A-CG-A---------G-A--------------------------------------------------C-C------------------------TTC-G------------------------------G--G------------------------------------------TC--T-------AG-T-G-G-C-GC-A--C--G-GG-T-G-C-G-T-A--AC-G-C-G-T-G-GG---A-A-T-CT-G-C-C-CTT--GG-G-T-T-C--G-G-A---AT-AA-C--TC--G-C-C-G-A-A-A-----…
>H97X84I02JNZS9
A-T-T-G-A--A-C-G-C--T-G-G-C-G-G--C-A-T-G--C---C-T--TA-C--AC-A-T-G--C-A-A-G--T-C--GA-A-CG-----------G-TAA--C-A--G--------------------------------------G-T-C------------------------TTC-G------------------------------G--A--T---------------------------G-C-T----G--AC--G-------AG-T-G-G-C-GA-A--C--G-GG-T-G-A-G-T-A--AT-A-C-A-T-C-GG---A-A-C-GT-G-C-CCGAG--A--G-T-G-G--G-G-G---AT-AA-C--GA--G-G-C-G-A-A-A-----…
>H97X84I02JJXUC
G-A-T-G-A--A-C-G-C--T-A-G-C-G-G--C-A-G-G--C---T-T--AA-C--AC-A-T-G--C-A-A-G--T-C--GC-G-GG-----------G-CAG----G--C----------------G--------------GG-G-G-A-TGAG-----------------------CTT-G----------------CT------------C--A--T-C---C--C------------------G-C-C----G--GC--G-------AC-C-G-G-C-GC-A--C--G-GG-T-G-A-G-T-A--AC-A-C-G-T-A-TG---CAA-C-CT-G-C-T-CCT--GT-C-A-G-G--G-G-G---AC-AA-C--CC--A-C-C-G-A-A-A-----…
>H97X84I02JJF9Q
G-A-T-G-A--A-C-G-C--T-A-G-C-G-A--C-A-G-G--C---C-T--AA-C--AC-A-T-G--C-A-A-G--T-C--GA-G-GG-----------G-CAG--C-G--G----------------G-------------GAG-C-G-A---AG-----------------------CTT-G----------------C-------------T--T--TGC-T-C--C------------------G-C-C----G--GC--G-------AC-C-G-G-C-GC-A--C--G-GG-T-G-A-G-T-A--AC-A-C-G-T-A-TG---CAA-C-CT-G-C-C-CCT--GT-C-A-G-G--G-G-G---AC-AA-C--CC--A-C-C-G-A-A-A-----…
>H97X84I02JIKGS
G-A-T-G-A--A-C-G-C--T-A-G-C-G-G--G-A-G-G--C---C-T--AA-C--AC-A-T-G--C-A-A-G--C-C--GA-G-CG-----------G-TA---G-A--G------------------------------------G-T-T-C------------------------TTC-G------------------------------G--A--A-T---------------------------C-T----T--GA--G-------AG-C-G-G-C-GT-A--C--G-GG-T-G-C-G-G-A--AC-A-C-G-T-G-TG---CAA-C-CT-G-T-C-TTT--AT-C-A-G-G--G-G-G---AT-AG-C--CT--T-T-C-G-A-A-A-----…
>H97X84I02JIDR4
G-A-T-G-A--A-C-G-C--T-G-G-C-G-G--C-G-T-G--C---C-T--AA-C--AC-A-T-G--C-A-A-G--T-C--GA-ACGG-G---------G-GC---A-GA-T--------------------------------T-GAA-ACC-T------------------------AGT-G------------------------------A--T--A-T-C-T-----------------------G-C-------CC--G-------AG-T-G-G-C-GG-A--C--G-GG-T-G-A-G-T-A--AC-G-C-G-T-G-GA---CAA-C-CT-G-C-C-GCA--TG-C-A-G-G--G-G-G---AT-AC-C--GG--C-T-G-G-A-A-A-----…
>H97X84I02JI5X0
G-A-T-G-A--A-C-G-C--T-G-G-C-G-G--C-G-C-G--C---T-T--AA-C--AC-A-T-G--C-A-A-G--T-C--GA-A-CG-G-----------G----G-G--T--------------G-C----------CATGAACGAAGCATCAG-----------------------TTT-A------------------------------CTGAT-A-TGG-A--GGG------------------A-ATGGGAC-CC--T-------AG-T-G-G-C-GG-A--C--G-GG-T-G-A-G-T-A--AC-G-C-G-T-G-GG---TAA-C-CT-G-C-C-CCA--TA-C-C-G-G--G-G-G---AT-AA-C--AC--T-T-A-G-A-A-A-----…
>H97X84I02JC65S
G-A-C-G-A--A-C-G-C--T-G-G-C-G-G--C-G-T-G--C---C-T--AA-T--AC-A-T-G--C-A-A-G--T-C--GA-G-CG-AGCTT-----G-C----CTAG-A------------------------------TGATTTT-AGT-G------------------------CTT-GCA----------------------------CTAAATGAAACTA--GA-------------------TACA---A--GC--G-------AG-C-G-G-C-GG-A--C--G-GG-T-G-A-G-T-A--AC-A-C-G-T-G-GG---TAA-C-CC-G-C-C-TGT--AA-G-A-C-C--G-G-G---AT-AA-C--TC--C-G-G-G-A-A-A-----…
>H97X84I02JEVSH
A---T-G-A--A-C-G-C--T-A-G-C-G-A--C-A-G-G--C---T-T--AA-C--AC-A-T-G--C-A-A-G--T-C--GA-A-CG-----------G-TAA--C-A--G--------------------------------------G-T-C------------------------TTC-G------------------------------G--A--T---------------------------G-C-T----G--AC--G-------AG-T-G-G-C-GA-A--C--G-GG-T-G-A-G-T-A--AT-A-C-A-T-C-GG---A-A-C-GT-G-C-C-CGA--TC-G-T-G-G--G-G-G---AT-AA-C--GA--A-G-C-G-A-A-A-----…
>H97X84I02JCKW4
G-A-T-G-A--A-C-G-C--T-A-G-C-G-A--C-A-G-G--C---C-T--AA-C--AC-A-T-G--C-A-A-G--T-C--GA-G-GG-----------G-CAG--C-G--G----------------G--------------GAGC-G-A-A-G------------------------CTT-G------------------------------C--T--T-TGC-T--CC-----------------G-C-C----G--GC--G-------AC-C-G-G-C-GC-A--C--G-GG-T-G-A-G-T-A--AC-G-C-G-T-A-TG---CAA-C-CT-G-C-C-CGT--TT-C-A-G-C--G-G-G---AT-AA-C--CC--G-G-A-G-A-A-A-----…
>H97X84I02J6HMS
A-T-T-G-A--A-C-G-C--T-G-G-C-G-G--C-A-T-G--C---C-T--AA-C--AC-A-T-G--C-A-A-G--T-C--GA-A-CG-A---------G-A--------------------------------------------------C-C------------------------TTC-G------------------------------G--G------------------------------------------TC--T-------AG-T---G-C-GC-A--C--G-GG-T-G-C-G-T-A--AC-G-C-G-T-G-GG---A-A-T-CT-G-C-C-CTT--GG-G-T-T-C--G-G-A---AT-AA-C--TC--G-C-C-G-A-A-A-----…
>H97X84I02J458B
A-A-C-G-A--A-C-G-C--T-G-G-C-G-G--C-A-T-G--C---C-T--AA-C--AC-A-T-G--C-A-A-G--T-C--GA-A-CG-------------G------A--C----------TT-AA-AT-------------TG-A-A---A-C------------------------CT--A------------------------------G-----T---G-A--A------GT------------T-T----AA-GT--T-------AG-T-G-G-C-GG-A--C--G-GG-T-G-A-G-T-A--AC-G-C-G-T-G-GA---TAA-C-CT-G-C-C-GTA--TG-C-A-G-G--G-G-G---AT-AC-C--AA--C-T-G-G-A-A-A-----…
>H97X84I02J3L3I
A-A-C-G-A--A-C-G-C--T-G-G-C-G-G--C-A-T-G--C---C-T--TA-C--AC-A-T-G--C-A-A-G--T-C--GA-A-CG-----------G-TAA--C-A--G--------------------------------------G-T-C------------------------TTC-G------------------------------G--A--T---------------------------G-C-T----G--AC--G-------AG-T-G-G-C-GA-A--C--G-GG-T-G-A-G-T-A--AT-A-C-A-T-C-GG---A-A-C-GT-G-C-C-C-G-ATC-G-T-G-G--G-G-G---AT-AA-C--GA--A-G-C-G-A-A-A-----…
>H97X84I02GEV4K
A-T-T-G-A--A-C-G-C--T-G-G-C-G-G--C-A-T-G--C---C-T--TA-C--AC-A-T-G--C-A-A-G--T-C--GA-A-CG-----------G-TA-----A--C------------------------------------A-G-G-T------------------------CTT-C------------------------------G--G--A-T-------------------------G-C-T----G--AC--G-------AG-T-G-G-C-GA-A--C--G-GG-T-G-A-G-T-A--AT-A-T-A-T-C-GG---A-A-C-GT-G-C-C-CAG--TA-G-T-G-G--G-G-G---AT-AA-C--TG--C-T-C-G-A-A-A-----…
>H97X84I02J3CJD
A---T-G-A--A-C-G-C--T-G-G-C-G-G--C-G-T-G--C---T-T--AA-C--AC-A-T-G--C-A-A-G--T-C--GA-A-CG-----------G-TAA--C-A--G--------------------------------------G-T-C------------------------TTC-G------------------------------G--A--T---------------------------G-C-T----G--AC--G-------AG-T-G-G-C-GA-A--C--G-GG-T-G-A-G-T-A--AT-A-C-A-T-C-GG---G-A-C-GT-G-C-C-CAG--AC-G-T-G-G--G-G-G---AT-AA-C--GA--G-G-C-G-A-A-A-----…
>H97X84I02J1C7L
G-A-T-G-A--A-C-G-C--T-A-G-C-G-A--C-A-G-G--C---T-T--AA-C--AC-A-T-G--C-A-A-G--T-C--GA-G-GG-----------G-CAG--CGGG-GA-------------------------------GCGAA-GCT-T------------------------GCT-T------------------------------T--G--C-T-C-C---------------------G-C-C----G--GC--G-------AC-C-G-G-C-GC-A--C--G-GG-C-G-A-G-T-A--AC-G-C-G-T-A-TG---CAA-C-CT-G-C-C-CGT--TT-C-A-G-C--G-G-G---AT-AA-C--CC--G-G-A-G-A-A-A-----…
>H97X84I02IZG6T
A-A-C-G-A--A-C-G-C--T-G-G-C-G-G--A-A-T-G--C---C-T--TA-C--AC-A-T-G--C-A-A-G--T-C--GA-A-CG-----------G-TAA--C-A--G--------------------------------------G-T-C------------------------TTC-G------------------------------G--A--T---------------------------G-C-T----G--AC--G-------AG-T-G-G-C-GA-A--C--G-GG-T-G-A-G-T-A--AT-A-C-A-T-C-GG---A-A-C-GT-G-C-C-CGA--TC-G-T-G-G--G-G-G---AT-AA-C--GA--A-G-C-G-A-A-A-----…
>H97X84I02IYD83
A-T-T-G-A--A-C-G-C--T-G-G-C-G-G--C-A-T-G--C---C-T--TA-C--AC-A-T-G--C-A-A-G--T-C--GA-A-CG-----------G-CAG--C-A--C----------------------------------G-G-G-T-G------------------------CTT-G------------------------------C--A--C-C-T-----------------------G-G-T----G--GC--G-------AG-T-G-G-C-GA-A--C--G-GG-T-G-A-G-T-A--AT-A-C-A-T-C-GG---A-A-C-AT-G-T-C-CTG--TA-G-T-G-G--G-G-G---AT-AG-C--CC--G-G-C-G-A-A-A-----…
>H97X84I02IXPQB
G-A-T-G-A--A-C-G-C--T-A-G-C-G-G--C-A-G-G--C---T-T--AA-C--AC-A-T-G--C-A-A-G--T-C--GC-G-GG-----------G-CAG--C-G--G----------------G--------------GGAT-G-A----G-----------------------CTT-G----------------CT------------C--A--T-C---C--C------------------G-C-C----G--GC--G-------AC-C-G-T-C-GC-A--C--G-GG-T-G-A-G-T-A--AC-A-C-G-T-A-TG---CAA-C-CT-G-C-C-CCT--GT-C-A-G-G--G-G-G---AC-AA-C--CC--A-C-C-G-A-A-A-----…
>H97X84I02IXFW9
G-A-T-G-A--A-C-G-C--T-G-G-C-G-G--C-G-T-G--C---C-T--AA-C--AC-A-T-G--C-A-G-G--T-C--GA-A-CG-A---------G-A--------------------------------------------------C-C------------------------TTC-G------------------------------G--G------------------------------------------TC--T-------AG-T-G-G-C-GC-A--C--G-GG-T-G-C-G-T-A--AC-G-C-G-T-G-GG---A-A-T-CT-G-C-C-CTT--GG-G-T-T-C--G-G-A---AT-AA-C--TC--G-C-C-G-A-A-A-----…
>H97X84I02IX5LE
G-A-T-G-A--A-C-G-C--T-A-G-C-G-A--C-A-G-G--C---C-T--AA-C--AC-A-T-G--C-A-A-G--T-C--GA-G-GG-----------G-CAG--C-G--G----------------G--------------GAGC-G-A-A-G------------------------CTT-G------------------------------C--T--T-TGC-T--CC-----------------G-C-C----G--GC--G-------AC-C-G-G-C-GC-A--C--G-GG-T-G-A-G-T-A--AC-G-C-G-T-A-TG---CAA-C-CT-G-C-C-CGT--TT-C-A-G-C--G-G-G---AT-AA-C--CC--G-G-A-G-A-A-A-----…
>H97X84I02ITZ7N
A-A-C-G-A--A-C-G-C--T-G-G-C-G-G--C-A-T-G--C---C-T--AA-C--AC-A-T-G--C-A-A-G--T-C--GA-A-CG-A---------G-AC-------------------------------------------------C-C------------------------TTC-G------------------------------G--G------------------------------------------TCG-T-------AG-T-G-G-C-GC-A--C--G-GG-T-G-C-G-T-A--AC-G-C-G-T-G-GG---A-A-T-CT-G-C-C-CTT--GG-G-T-T-C--G-G-A---AT-AA-C--TC--G-C-C-GAA-A-A-----…
>H97X84I02IRXSN
G-A-T-G-A--A-C-G-C--T-G-G-C-G-G--C-A-T-G--C---C-T--AA-C--AC-A-T-G--C-A-A-A--T-C--GA-A-CG-A---------G-A--------------------------------------------------C-C------------------------TTC-G------------------------------G--G------------------------------------------TC--T-------AG-T-G-G-C-GC-A--C--G-GG-T-G-C-G-T-A--AC-G-C-G-T-G-GG---A-A-T-CT-G-C-C-CTT--GG-G-T-T-C--G-G-A---AT-AA-C--TC--G-C-C-G-A-A-A-----…
>H97X84I02GXHNJ
G-A-T-G-A--A-C-G-C--T-A-G-C-G-A--C-A-G-G--C---T-T--AA-C--AC-A-T-G--C-A-A-G--T-C--GA-G-GG-----------G-CAG--C-G--G----------------G-------------GTA-G-G-A-A-G------------------------CTT-G------------------------------C--T--T-T-C-TC-CC-----------------G-C-C----G--GC--G-------AC-C-G-G-C-GC-A--C--G-GG-T-G-A-G-T-A--AC-G-C-G-T-A-TG---CAA-C-CT-G-C-C-CGT--TT-C-A-G-C--G-G-G---AT-AA-C--CC--G-G-A-G-A-A-A-----…
>H97X84I02INDCQ
G-A-T-G-A--A-C-G-C--T-A-G-C-G-G--C-A-G-G--C---T-T--AA-T--AC-A-T-G--C-A-A-G--T-C--GT-G-GG-----------G-CAG--C-G--T-------------------------------G--A---G-T-A------------------------GCA-A------------------------------T--A------C-T--T------------------G-A-T----G--GC--G-------AC-C-G-G-C-AA-A--C--G-GG-T-G-C-G-G-A--AC-A-C-G-T-A-CA---CAA-C-CT-T-C-C-TAC--AA-G-T-G-G--G-G-A---AT-AG-C--CC--A-G-A-G-A-A-A-----…
>H97X84I02IMKUE
A-A-C-G-A--A-C-G-C--T-G-G-C-G-G--C-A-T-G--C---C-T--AA-C--AC-A-T-G--C-A-A-G--T-C--GA-G-CG-A---------A-C----C-A--A-------------------------------TA-A-G-A-A-G------------------------CTT-G------------------------------C--T--T-T-T-T--G--------------------T-T----G--GT--T-------AG-C-G-G-C-GG-A--C--G-GG-T-G-A-G-T-A--AC-A-C-G-T-G-GG---TAA-C-CT-G-C-C-TGT--AA-G-A-C-C--G-G-G---AT-AA-C--TC--C-G-G-G-A-A-A-----…
>H97X84I02IKNA2
A-T-T-G-A--A-C-G-C--T-A-G-C-G-G--G-A-T-G--C---T-T--TA-C--AC-A-T-G--C-A-A-G--T-C--GA-A-CG-----------G-CAG--C-G--C----------------G---------------G-------A--------------------------CTT--------------------------------C-----G-G-T-C---T-----------------G-G-C----G--GC--G-------AG-T-G-G-C-GA-A--C--G-GG-T-G-A-G-T-A--AT-G-T-A-T-C-GG---A-A-C-GT-G-C-C-CAG--TA-G-C-G-G--G-G-G---AT-AA-C--TA--C-G-C-G-A-A-A-----…
>H97X84I01B0VBY
G-A-T-G-A--A-C-G-C--T-A-G-C-G-G--C-A-G-G--C---T-T--AA-C--AC-A-T-G--C-A-A-G--T-C--GC-G-GG-G---------C-AGC--G-G--G----------------------------------G-G-A-TGA----------------------GCTTG-C------------------------------TC-A--T-C-C-------------------------CGC----CG-GC--G-------AC-C-G-G-C-GC-A--C--G-GG-T-G-A-G-T-A--AC-G-C-G-T-A-TG---CAA-C-CT-G-C-C-CGT--TT-C-A-G-C--G-G-G---AT-AA-C--CC--G-G-A-G-A-A-A-----…
>H97X84I02IEDDO
A-T-T-G-A--A-C-G-C--T-A-G-C-G-G--G-A-T-G--C---T-T--TA-C--AC-A-T-G--C-A-A-G--T-C--GA-A-CG-----------G-TA-----A--C------------------------------------G-G-G--------------------------TCC-T------------------------------T--C--G-G-------------------------G-A-T----GCCGAC-G-------AG-T-G-G-C-GA-A--C--G-GG-T-G-A-G-T-A--AT-A-T-A-T-C-GG---A-A-C-GT-G-C-C-CAG--TA-G-T-G-G--G-G-G---AT-AA-C--TG--C-T-C-G-A-A-A-----…
>H97X84I02IBWNW
G-A-T-G-A--A-C-G-C--T-G-G-C-G-G--C-G-T-G--C---T-T--AA-C--AC-A-T-G--C-A-A-G--T-C--GA-A-CG-G---------A-G----T-A--A----------AGATT-T--------------TG-A-T-T-T-C------------------------TAA-C------------------------------G--A--T-T-G-A--GAG--GT-C------------T-T----TA-CT--T-------AG-T-G-G-C-GG-A--C--G-GG-T-G-A-G-T-A--AC-G-C-G-T-G-GA---TAA-C-CT-G-C-C-CCA--TA-C-C-G-G--G-G-G---AT-AA-C--AG--C-C-G-G-A-A-A-----…
>H97X84I02IB4AW
A-A-C-G-A--A-C-G-C--T-G-G-C-G-G--C-A-T-G--C---C-T--AA-C--AC-A-T-G--C-A-A-G--T-C--GA-A-CG-G---------G-G----G-T--G----------CCA---T--------------GA-A-C-G-A-AGCATC-------------------AGT-T------------TACTG-------------A--TA-TGG-A-G--GGA--ATGG------------G-A----C--CC--T-------AG-T-G-G-C-GG-A--C--G-GG-T-G-A-G-T-A--AC-G-C-G-T-G-GG---TAA-C-CT-G-C-C-CCA--TA-C-C-G-G--G-G-G---AT-AA-C--AC--T-T-A-G-A-A-A-----…
>H97X84I02I96QT
G-A-T-G-A--G-C-G-C--T-A-G-C-G-G--C-A-G-G--C---T-T--AA-C--AC-A-T-G--C-A-A-G--T-C--GC-G-GG-----------G-CAG--C-G--G----------------G--------------GG---G-A-TGAG-----------------------CTT-G----------------CT------------C--A--T-C---C--C------------------G-C-C----G--GC--G-------AC-C-G-G-C-GC-A--C--G-GG-T-G-A-G-T-A--AC-A-C-G-T-A-TG---CAA-C-CT-G-C-C-CCT--GT-C-A-G-G--G-G-G---AC-AA-C--CC--A-C-C-G-A-A-A-----…
>H97X84I02I83ZW
A---T-GAA----C-G-C--T-A-G-C-G-A--C-A-G-G--C---T-T--AA-C--AC-A-T-G--C-A-A-G--T-C--GA-G-CG-G---------G-C------------------------------------------------G-T-A------------------------GCA-A------------------------------T--A--T---------------------------------------GT--C-------AG-C-G-G-C-AG-A--C--G-GG-T-G-A-G-T-A--AC-G-C-G-T-G-GG---A-A-C-GT-A-C-C-TTT--TG-G-T-T-C--G-G-A---AC-AA-C--AC--A-G-G-G-A-A-A-----…
>H97X84I02I5RJP
T-A---G-A--A-C-G-C--T-G-G-C-G-G--C-A-T-G--C---C-T--TA-C--AC-A-T-G--C-A-A-G--T-C--GA-A-CG-A---------G-A--------------------------------------------------C-C------------------------TTC-G------------------------------G--G------------------------------------------TC--T-------AG-T-G-G-C-GC-A--C--G-GG-T-G-C-G-T-A--AC-G-C-G-T-G-GG---A-A-T-CT-G-C-C-CTT--GG-G-T-T-C--G-G-A---AT-AA-C--TC--G-C-C-G-A-A-A-----…
>H97X84I02I4UYJ
G-A-T-G-A--A-C-G-C--T-G-G-C-G-G--C-G-T-G--C---C-T--AA-T--AC-A-T-G--C-A-A-G--T-C--GA-G-CG-A---------A-C----C-A--A-------------------------------TA-A-G-A-A-G------------------------CTT-G------------------------------C--T--T-T-T-T--G--------------------T-T----G--GT--T-------AG-C-G-G-C-GG-A--C--G-GG-T-G-G-G-T-A--AC-A-C-G-T-G-GG---TAA-C-CT-G-C-C-TGT--AA-G-A-C-C--G-G-G---AT-AA-C--TC--C-G-G-G-A-A-A-----…
>H97X84I02I48W2
G-A-T-G-A--A-C-G-C--T-G-G-C-G-G--C-G-T-G--C---T-T--AA-C--AC-A-T-G--C-A-A-G--T-C-GAACGGGG-G---------T-G----C-C--A----------TGAACGA--------------AGCA-TCAGT-T------------------------TAC-T------------------------------G--A--TAT-G-G--AGG--GAAT------------G-G----GACCC--T-------AG-T-G-G-C-GG-A--C--G-GG-C-G-A-G-T-A--AC-G-C-G-T-G-GA---TAA-C-CT-G-C-C-CCA--TA-C-C-G-G--G-G-G---AT-GA-C--AG--C-C-G-G-A-A-A-----…
>H97X84I02I2PYX
A-A-C-G-A--A-C-G-C--T-G-G-C-G-G--C-A-T-G--C---C-T--TA-C--AC-A-T-G--C-A-A-G--T-C--GA-A-CG-----------G-TAA--C-A--G--------------------------------------G-T-C------------------------TTC-G------------------------------G--A--T---------------------------G-C-T----G--AC--G-------AG-T-G-G-C-GA-A--C--G-GG-T-G-A-G-T-A--AT-A-C-A-T-C-GG---A-A-C-GT-G-C-C-CGA--GA-G-T-G-G--G-G-G---AT-AA-C--AA--G-G-C-G-A-A-A-----…
>H97X84I02I1G9C
A---C-G-A--A-C-G-C--T-G-G-C-G-G--C-A-T-G--C---C-T--TA-C--AC-A-T-G--C-A-A-G--T-C--GA-A-CG-----------G-TA-----A--C------------------------------------G-G-G--------------------------TCC-T------------------------------T--C--G-G-------------------------G-A-T----GCCGAC-G-------AG-T-G-G-C-GA-A--C--G-GG-T-G-A-G-T-A--AT-A-T-A-T-C-GG---A-A-C-GT-G-C-C-CAG--TA-G-T-G-G--G-G-G---AT-AA-C--TG--C-T-C-G-A-A-A-----…
>H97X84I02HTLC2
G-A-T-G-A--A-C-G-C--T-A-G-C-G-A--C-A-G-G--C---T-T--AA-C--AC-A-T-G--C-A-A-G--C-C--GA-G-TG-G---------T-A----T-T--G------------------------------------T-T-T-C------------------------TTC-G------------------------------G--A--A-A---------------------------T-G----A--GA--G-------AG-C-G-G-C-GT-A--C--G-GG-T-G-C-G-G-A--AC-A-C-G-T-G-TG---CAA-C-CT-G-C-C-TTT--AT-C-T-G-G--G-G-G---AT-AG-C--CT--T-T-C-G-A-A-A-----…
>H97X84I02GK5OC
A-A-C-A-C--A-T-G-CA-A-G-T-C-G-A--A-C-G-G--G---G-T-ATA-T--AA-G-C-G--G-A-A-GTTTAC--GG-A-TG-G---------A-A--------------------------------------------------G-G------------------------TTATA------------------------------T--A------------------------------------------CC--C-------AG-T-G-G-C-GC-A--C--G-GG-T-G-C-G-T-A--AC-G-C-G-T-G-GG---A-A-T-CT-G-C-C-CTT--GG-G-T-T-C--G-G-A---AT-AA-C--TC--G-C-C-G-A-A-A-----…
>H97X84I02HRW23
A-T-T-G-A--A-C-G-C--T-A-G-C-G-G--G-A-T-G--C---T-T--TA-C--AC-A-T-G--C-A-A-G--T-C--GA-A-CG-----------G-CAG--C-G--C------------------------------------G-G-A-C------------------------TTC-G------------------------------G--T--C-T-------------------------G-G-C----G--GC--A-------AG-T-G-G-C-GA-A--C--G-GG-T-G-A-G-T-A--AT-G-T-A-T-C-GG---A-A-C-GT-G-C-C-CAG--TA-G-C-G-G--G-G-G---AT-AA-C--TA--C-G-C-G-A-A-A-----…
>H97X84I02FV8G9
G-A-T-G-A--A-C-G-C--T-A-G-C-G-A--C-A-G-G--C---T-T--AA-C--AC-A-T-G--C-A-A-G--T-C--GA-G-GG-----------G-CAG--CGGG-G----------------GT-------------GATG-GCT-T--------------------------GCC-A---------------------------------T----C-A-C--CT-----------------G-C-C----G--GC--G-------AC-C-G-G-C-GC-A--C--G-GG-T-G-T-G-T-A--AC-A-C-G-T-A-TG---AAA-C-CT-G-C-C-CGT--AG-C-A-G-G--G-G-G---AT-AA-G--CG--G-A-A-G-A-A-A-----…
>H97X84I02HPLJM
A-T-T-G-A--A-C-G-C--T-G-G-C-G-G--C-A-T-G--C---C-T--TA-C--AC-A-T-G--C-A-A-G--T-C--GA-A-CG-----------G-TAA--C-A--G--------------------------------------G-T-C------------------------TTC-G------------------------------G--A--T---------------------------G-C-T----G--AC--G-------AG-T-G-G-C-GA-A--C--G-GG-T-G-A-G-T-A--AT-A-C-A-T-T-GG---A-A-C-GT-G-C-C-CGA--TC-G-T-G-G--G-G-G---AT-AA-C--GA--G-G-C-G-A-A-A-----…
>H97X84I02HLWZR
G-A-C-G-A--A-C-G-C--T-G-G-C-G-G--C-G-T-G--C---C-T--AA-T--AC-A-T-G--C-A-A-G--T-C--GA-G-CG-A---------A-C----C-A--A-------------------------------TA-A-G-A-A-G------------------------CTT-G------------------------------C--T--T-T-T-T--G--------------------T-T----G--GT--T-------AG-C-G-G-C-GG-A--C--A-GG-C-G-A-G-T-A--AC-A-C-G-T-G-GG---TAA-C-CT-G-C-C-TGT--AA-G-A-C-C--G-G-G---AT-AA-C--TC--C-G-G-G-A-A-A-----…
>H97X84I02HJV0K
A-A-C-G-A--A-C-G-C--T-G-G-C-G-G--C-A-T-G--C---C-T--TA-C--AC-A-T-G--C-A-A-G--T-C--GA-A-CG-----------G-CAG--C-A--C------------------------------------G-G-A-C------------------------TTC-G------------------------------G--T--C-T-------------------------G-G-T----G--GC--G-------AG-T-G-G-C-GA-A--C--G-GG-T-G-A-G-T-A--AT-G-T-A-T-C-GG---A-A-C-GT-A-C-C-TTT--CA-G-T-G-G--G-G-G---AT-AA-C--GT--A-G-C-G-A-A-A-----…
>H97X84I02HIDNG
A-A-C-G-A--A-C-G-C--T-G-G-C-G-G--C-A-G-G--C---T-T--AA-C--AC-A-T-G--C-A-A-G--T-C--GA-G-CG-G---------A-G----A-T--G----------------------------------A-G-G-T-G------------------------CTT-G------------------------------C--A--C-C-T-------------------------T-A----T--CT--T-------AG-C-G-G-C-GG-A--C--G-GG-T-G-A-G-T-A--AT-G-C-T-T-A-GG---A-A-T-CT-G-C-C-TAT--TA-G-T-G-G--G-G-G---AC-AA-C--AT--T-C-C-G-A-A-A-----…
>H97X84I02HGTD0
A-A-C-G-A--A-C-G-C--T-G-G-C-G-G--C-G-T-G--C---C-T--AA-C--AC-A-T-G--C-A-A-G--T-C--GA-A-CG-------------G------A--C----------TT-AA-AT-------------TG-A-A---A-C------------------------CT--A------------------------------G-----T---G-A--A------GT------------T-T----AA-GT--T-------AA-T-G-G-C-GG-A--C--G-GG-T-G-A-G-T-A--AC-G-C-G-T-G-GA---TAA-C-CT-G-C-C-GTA--TG-C-A-G-G--G-G-G---AT-AC-C--AA--C-T-G-G-A-A-A-----…
>H97X84I02FQUZG
G-A-T-G-A--A-C-G-C--T-A-G-C-G-G--C-A-G-G--C---C-T--AA-T--AC-A-T-G--C-A-A-G--T-C--GA-A-CG-A---------G-A--------------------------------------------------C-C------------------------TTC-G------------------------------G--G------------------------------------------TC--T-------AG-T-G-G-C-GC-A--C--G-GG-T-G-C-G-T-A--AC-G-C-G-T-G-GG---A-A-T-CT-G-C-C-CTT--GG-G-T-T-C--G-G-A---AT-AA-C--TC--G-C-C-G-A-A-A-----…
>H97X84I01BK7IV
G-A-T-G-A--A-C-G-C--T-A-G-C-G-G--C-A-G-G--C---T-T--AA-C--AC-A-T-G--C-A-A-G--T-C--GC-G-GG-----------G-CAG--C-G--G----------------G--------------GGAT-G-A----G-----------------------CTT-G----------------CT------------C--A--T-C---C--C------------------G-C-C----G--GC--G-------AC-C-G-G-C-GC-A--C--G-GG-T-G-A-G-T-A--AC-A-C-G-T-A-TG---CAA-C-CT-G-C-C-CGC--CA-C-A-G-G--G-G-G---AT-AA-G--CG--G-A-A-G-A-A-A-----…
>H97X84I02HETBF
A-A-C-G-A--A-C-G-C--T-G-G-C-G-G--C-A-T-G--C---C-T--AA-C--AC-A-T-G--T-A-A-G--T-C--GA-A-CG-A---------G-A--------------------------------------------------C-C------------------------TTC-G------------------------------G--G------------------------------------------TC--T-------AG-T-G-G-C-GC-A--C--G-GG-T-G-C-G-T-A--AC-G-C-G-T-G-GG---A-A-T-CT-G-C-C-CTT--GG-G-T-T-C--G-G-A---AT-AA-C--TC--G-C-C-G-A-A-A-----…
>H97X84I02HDMRU
A---C-G-A--A-C-G-C--T-G-G-C-G-G--C-A-T-G--C---C-T--TA-C--AC-A-T-G--C-A-A-G--T-C--GA-A-CG-----------G-TAA--C-A--G--------------------------------------G-T-T------------------------TTC-G------------------------------G--A--T---------------------------G-C-T----G--AC--G-------AG-T-G-G-C-GA-A--C--G-GG-T-G-A-G-T-A--AT-A-C-A-T-C-GG---A-A-C-GT-G-C-C-CAG--AC-G-T-G-G--G-G-G---AT-AA-C--GA--G-G-C-G-A-A-A-----…
>H97X84I02HBG6J
G-A-T-G-A--A-C-G-C--T-A-G-C-G-A--C-A-G-G--C---C-T--AA-C--AC-A-T-G--C-A-A-G--T-C--GA-G-GG-----------G-CAG--C-G--G----------------G--------------G--A-GCG-A-AG-----------------------CTT-G----------------C-------------T--T--TGC-T----CC-----------------G-C-C----G--GC--G-------AC-C-G-G-C-GC-A--C--G-GG-T-G-A-G-T-A--AC-A-C-G-T-A-TG---CAA-C-CT-G-G-C-CGT--GA-C-A-G-A--T-G-G---AT-AA-C--CG--G-G-A-G-A-A-A-----…
>H97X84I02H8CXK
A-A-C-G-A--A-C-G-C--T-G-G-C-G-G--C-G-T-G--C---T-T--AA-C--AC-A-T-G--C-A-A-A--T-C--GA-A-CG-G---------A-G----T-A--A----------AGATT-T--------------TG-A-T-T-T-C------------------------TAA-C------------------------------G--A--T-T-G-A--GAG--GT-C------------T-T----TA-CT--T-------AG-T-G-G-C-GG-A--C--G-GG-T-G-A-G-T-A--AC-G-C-G-T-G-GA---TAA-C-CT-G-C-C-CCA--TA-C-C-G-G--G-G-G---AT-AA-C--AG--C-C-G-G-A-A-A-----…
>H97X84I02H8AM8
G-A-T-G-A--A-C-G-C--T-A-G-C-G-G--C-A-G-G--C---T-T--AA-T--AC-A-T-G--C-A-A-G--T-C--GT-G-GG-----------G-CAG--C-A--T-------------------------------G--A---G-T-A------------------------GCA-A------------------------------T--A------C-T--T------------------G-A-T----G--GC--G-------AC-C-G-G-C-AA-A--C--G-GG-T-G-C-G-G-A--AC-A-C-G-T-A-CA---CAA-C-CT-T-C-C-TAC--AA-G-T-G-G--G-G-A---AT-AG-C--CC--A-G-G-G-A-A-A-----…
>H97X84I02H83IY
G-T-T-G-A--A-C-G-C--T-G-G-C-G-G--C-A-T-G--C---C-T--TA-C--AC-A-T-G--C-A-A-G--T-C--GA-A-CG-----------G-TAA--C-A--G--------------------------------------G-T-C------------------------TTC-G------------------------------G--A--T---------------------------G-C-T----G--AC--G-------AG-T-G-G-C-GA-A--C--G-GG-T-G-A-G-T-A--AT-A-C-A-T-T-GG---A-A-C-GT-G-C-C-CGA--TC-G-T-G-G--G-G-G---AT-AA-C--GA--G-G-C-G-A-A-A-----…
>H97X84I02H4I4X
A-A-C-G-A--A-C-G-C--T-G-G-C-G-G--C-A-T-G--C---C-T--AA-C--AC-A-T-G--T-A-A-G--T-C--GA-A-CG-A---------G-A--------------------------------------------------C-C------------------------TTC-G------------------------------G--G------------------------------------------TC--T-------AG-T-G-G-C-GC-A--C--G-GG-T-G-C-G-T-A--AC-G-C-G-T-G-GG---A-A-T-CT-G-C-C-CTT--GG-G-T-T-T--G-G-A---AT-AA-C--TC--G-C-C-G-A-A-A-----…
>H97X84I02H44BJ
G-A-C-G-A--A-C-G-C--T-G-G-C-G-G--C-A-T-G--C---C-T--AA-C--AC-A-T-G--C-A-A-G--T-C--GA-A-CG-A---------G-A--------------------------------------------------C-C------------------------TTC-G------------------------------G--G------------------------------------------TC--T-------AG-T-G-G-C-GC-A--C--G-GG-T-G-C-G-T-A--AC-G-C-G-T-G-GG---A-A-T-CT-G-C-C-CTT--GG-A-T-T-C--G-G-A---AT-AA-C--TC--G-C-C-G-A-A-A-----…
>H97X84I02H3OTB
A-T-T-G-A--A-C-G-C--T-G-G-C-G-G--C-A-G-G--C---T-T--AA-C--AC-A-T-G--C-A-A-G--T-C--GA-A-CG-A---------G-A--------------------------------------------------C-C------------------------TTC-G------------------------------G--G------------------------------------------TC--T-------AG-T-G-G-C-GC-A--C--G-GG-T-G-C-G-T-A--AC-G-C-G-T-G-GG---A-A-T-CT-G-C-C-CTT--GG-G-T-T-C--G-G-A---AT-AA-C--TC--G-C-C-G-A-A-A-----…
>H97X84I02H3JDV
G-A-C-G-A--A-C-G-C--T-G-G-C-G-G--C-G-T-G--C---C-T--AA-T--AC-A-T-G--C-A-A-G--T-C--GA-G-CG-A---------A-C----C-A--A-------------------------------TA-A-G-A-A-G------------------------CTT-G------------------------------C--T--T-T-T-T--G--------------------T-T----G--GT--T-------AG-C-G-G-C-GG-A--C--G-GG-T-G-A-G-T-A--AC-A-C-G-T-G-GG---TAA-C-CT-G-C-C-TGT--AA-G-A-C-C--G-G-G---AT-AA-C--TC--C-G-G-G-A-A-A-----…
>H97X84I02H2O73
A-A-C-G-A--A-C-G-C--T-G-G-C-G-G--C-A-T-G--C---C-T--AA-C--AC-A-T-G--C-A-A-G--T-C--GA-A-CG-----------G-TAA--C-G--G--------------------------------------G-TCC------------------------TTCGG------------------------------G--A--T---------------------------G-C-C----G--AC--G-------AG-T-G-G-C-GA-A--C--G-GG-T-G-A-G-T-A--AT-A-C-A-T-C-GG---A-A-C-GT-G-C-C-CAG--AC-G-T-G-G--G-G-G---AT-AA-C--GA--G-G-C-G-A-A-A-----…
>H97X84I02GZ23B
G-A-T-G-A--A-C-G-C--T-G-G-C-G-G--C-G-T-G--C---C-T--AA-C--AC-A-T-G--C-A-A-G--T-C--GA-A-CG-G---------A------C-T--T-----------AAAT----------------TG-A---A-A-C--------------------------C--------------------------------T--A--G-T-G-A--AG----TTT--------------A----A--GT--T-------AG-T-G-G-C-GG-A--C--G-GG-T-G-A-G-T-A--AC-G-C-G-T-G-GA---TAA-C-CT-G-C-C-GTA--TG-C-A-G-G--G-G-G---AT-AC-C--AA--C-T-G-G-A-A-A-----…
>H97X84I01CL31Y
G-A-T-G-A--A-C-G-C--T-A-G-C-G-A--C-A-G-G--C---T-T--AA-C--AC-A-T-G--C-A-A-G--T-C--GA-G-GG-----------G-CAG--C-G--G----------------G--------------GG-T-G-A-T-GG-----------------------CTT-G----------------C-------------C--A--T-C-A-C--CT-----------------G-C-C----G--GC--G-------AC-C-G-G-C-GC-A--C--G-GG-T-G-A-G-T-A--AC-A-C-G-T-A-TG---CAA-C-CT-G-G-C-CGT--GA-C-A-G-A--T-G-G---AT-AA-C--CG--G-G-A-G-A-A-A-----…
>H97X84I02GWCC5
A---C-G-A--A-C-G-C--T-G-G-C-G-G--C-A-T-G--C---C-T--TA-C--AC-A-T-G--C-A-A-G--T-C--GA-A-CG-----------G-TAA--C-G--G------------------------------------G-T-C-C------------------------TTC-G------------------------------G--G--A-T-------------------------G-C-C----G--AC--G-------AG-T-G-G-C-GA-A--C--G-GG-T-G-A-G-T-A--AT-A-T-A-T-C-GG---A-A-C-GT-G-C-C-CAG--TA-G-C-G-G--G-G-G---AT-AA-C--TA--C-G-C-G-A-A-A-----…
>H97X84I02GTXOF
G-ATT-G-A--A-C-G-C--T-G-G-C-G-G--C-G-T-G--C---T-T--AA-C--AC-A-T-G--C-A-A-G--T-C--GA-A-CG-----------G-AA---A-G--G--------------------------------C-C-C-T-G-C------------------------TTT-T------------------------------G--T--G-G-G-G-----------------------T-G----C--TC--G-------AG-T-G-G-C-GA-A--C--G-GG-T-G-A-G-T-A--AC-A-C-G-T-G-AG---TAA-C-CT-G-C-C-CTT--GA-C-T-T-T--G-G-G---AT-AA-C--TT--C-A-G-G-A-A-A-----…
>H97X84I02GSPK9
A-T-T-G-A--A-C-G-C--T-G-G-C-G-G--C-A-T-G--C---C-T--TA-C--AC-A-T-G--C-A-A-G--T-C--GA-A-CG-----------G-TAA--C-A--G--------------------------------------G-T-C------------------------TTC-G------------------------------G--A--T---------------------------G-C-T----G--AC--G-------AG-T-G-G-C-GA-A--C--G-GG-T-G-A-G-T-A--AT-A-C-A-T-C-GG---A-A-C-GT-G-C-CCAGA---C-G-T-G-G--G-G-G---AT-AA-C--GA--G-G-C-G-A-A-A-----…
>H97X84I02GSAR6
G-A-T-G-A--A-C-G-C--T-A-G-C-G-G--G-A-G-G--C---C-T--AA-C--AC-A-T-G--C-A-A-G--T-C--GA-G-GG-----------G-CAG--C-G--G----------------G--------------GG-A-G-T-A--------------------------GCA-A---------------------------------T--A-C-T-C--CC-----------------G-C-C----G--GC--G-------AC-C-G-G-C-GC-A--C--G-GG-T-G-A-G-T-A--AC-A-C-G-T-A-TG---AAA-C-CT-G-C-C-CGT--AG-C-A-G-G--G-G-G---AT-AA-G--CG--G-A-A-G-A-A-A-----…
>H97X84I02GRHYQ
A-T-T-G-A--A-C-G-C--T-G-G-C-G-G--C-A-T-G--C---C-T--TA-C--AC-A-T-G--C-A-A-G--T-C--GA-A-CG-----------G-TA-----A--C----------------------------------A-G-G-T--------------------------CTT--------------------------------C--G--G-A-T-----------------------G-C-T----G--AC--G-------AG-T-G-G-C-GA-A--C--G-GG-T-G-A-G-T-A--AT-A-C-A-T-C-GG---A-A-C-GT-G-C-C-CAG--AC-G-T-G-G--G-G-G---AT-AA-C--GA--G-G-C-G-A-A-A-----…
>H97X84I02GQTDM
A-A-C-G-A--A-C-G-C--T-G-G-C-G-G--C-A-T-G--C---C-T--AA-C--AC-A-T-G--T-A-A-G--T-C--GA-A-CG-A---------G-A--------------------------------------------------C-C------------------------TTT-G------------------------------G--G------------------------------------------TC--T-------AG-T-G-G-C-GC-A--C--G-GG-T-G-C-G-T-A--AC-A-C-G-T-G-GG---A-A-T-CT-G-C-C-CTT--GG-G-T-T-C--G-G-A---AT-AA-C--TC--G-C-C-G-A-A-A-----…
>H97X84I02GOITH
G-A-T-G-A--A-C-G-C--T-G-G-C-G-G--C-G-T-G--C---T-T--AA-C--AC-A-T-G--C-A-A-G--T-C--GA-G-CG-A---------AGC----A-T--A-------------------------------AA-A-G---A-G------------------------GAA-G------------------------------T--T--TTAAATG--GAA------------------T-C-GATTATGACTG-------AG-C-G-G-C-GG-A--C--G-GG-T-G-A-G-T-A--AC-A-C-G-T-G-GG---TAA-C-CT-G-C-C-TGT--AA-G-A-C-C--G-G-G---AT-AA-C--TC--C-G-G-G-A-A-A-----…
>H97X84I01CGPPR
G-A-T-G-A--A-C-G-C--T-A-G-C-G-A--C-A-G-G--C---C-T--AA-C--AC-A-T-G--C-A-A-G--T-C--GA-G-GG-----------G-CAG--C-G--G----------------G--------------GA-GCG-A-A--------------------------GC--T---------------------------------T--G-CTT-TG-CTCC---------------G-C-C----G--GC--G-------AC-C-G-G-C-GC-A--C--G-GG-T-G-A-G-T-A--AC-A-C-G-T-A-TG---AAA-C-CT-G-C-C-CGT--AG-C-A-G-G--G-G-G---AT-AA-G--CG--G-A-A-G-A-A-A-----…
>H97X84I02GKTF0
A-A-C-G-A--A-C-G-C--T-G-G-C-G-G--C-A-T-G--C---C-T--TA-C--AC-A-T-G--C-A-A-G--T-C--GA-A-CG-----------G-TA-----A--C------------------------------------G-G-G--------------------------TCC-T------------------------------T--C--G-G-------------------------G-A-T----GCCGAC-G-------AG-T-G-G-C-GA-A--C--G-GG-T-G-A-G-T-A--AT-A-T-A-T-C-GG---A-A-C-GT-G-C-C-CGG--TA-G-T-G-G--G-G-G---AT-AA-C--TG--C-T-C-G-A-A-A-----…
>H97X84I02GJ69H
A-A-C-G-A--A-C-G-C--T-G-G-C-G-G--C-A-T-G--C---C-T--TA-C--AC-A-T-G--C-A-A-G--T-C--GG-A-CG-----------G-TAA--C-A--G--------------------------------------G-T-C------------------------TTC-G------------------------------G--A--T---------------------------G-C-T----G--AC--G-------AG-T-G-G-C-GA-A--C--G-GG-T-G-A-G-T-A--AT-A-C-A-T-C-GG---A-A-C-GT-G-C-C-CGA--TC-G-T-G-G--G-G-G---AT-AA-C--GA--G-G-C-G-A-A-A-----…
>H97X84I02GHZ5E
G-A-T-G-A--A-C-G-C--T-A-G-C-G-A--C-A-G-G--C---T-T--AA-C--AC-A-T-G--C-A-A-G--T-C--GA-G-GG-----------G-CAG--C-G--G----------------G--------------GT-A-G-G-A-AG-----------------------CTT-G----------------C-------------T--T--T-C-T-G--CC-----------------G-C-C----G--GC--G-------AC-C-G-G-C-GC-A--C--G-GG-T-G-A-G-T-A--AC-A-C-G-T-A-TG---CAA-C-CT-G-G-C-CGT--GA-C-A-G-A--T-G-G---AT-AA-C--CG--G-G-A-G-A-A-A-----…
>H97X84I02GHGSZ
A-A-C-G-A--A-C-G-C--T-G-G-C-G-G--C-A-T-G--C---C-T--AA-C--AC-A-T-G--C-A-A-G--T-C--GA-A-CG-A---------G-A--------------------------------------------------C-C------------------------TTC-G------------------------------G--G------------------------------------------TC--T-------AG-T-G-G-C-GC-A--C--G-GG-T-G-C-G-T-A--AC-G-C-G-T-A-GG---A-A-T-CT-G-C-C-CTT--GG-G-T-T-C--G-G-A---AT-AA-C--TC--G-C-C-G-A-A-A-----…
>H97X84I02GFA32
A-A-C-G-A--A-C-G-C--T-G-G-C-G-G--C-A-T-G--C---C-T--AA-C--AC-A-T-G--T-A-A-G--T-C--GA-A-CG-A---------G-A--------------------------------------------------C-C------------------------TTC-G------------------------------G--G------------------------------------------TC--T-------AG-T-G-G-C-GC-A--C--G-GG-T-G-C-G-T-A--AC-G-C-G-T-G-GG---A-A-T-CT-G-T-C-CTT--GG-G-T-T-C--G-G-A---AT-AA-C--TC--G-C-C-G-A-A-A-----…
>H97X84I02G978F
G-ATT-G-A--A-C-G-C--T-G-G-C-G-G--C-A-T-G--C---C-T--TA-C--AC-A-T-G--C-A-A-G--T-C--GA-G-CG-A---------------------A---CC-A---AT-A------------------A-G-A---A-G------------------------CTT-G------------------------------------C-T-------T-------TTTG------T-C------G--GT--T-------AG-C-G-G-C-GG-A--C--A-GG-T-G-A-G-T-A--AC-A-C-G-T-G-GG---TAA-C-CT-G-C-C-CAA--GA-G-A-C-T--G-G-G---AT-AA-C--AC--C-T-G-G-A-A-A-----…
>H97X84I02G8TYP
A-T-T-G-A--A-C-G-C--T-G-GTTCG-G--C-A-T-G--C---C-T--TA-C--GC-A-T-G--C-A-A-G--T-C--GA-A-CG-----------G-TA-----A--C------------------------------------G-G-G--------------------------TCC-T------------------------------T--C--G-G-------------------------G-A-T----GCCGAC-G-------AG-T-G-G-C-GA-A--C--G-GG-T-G-A-G-T-A--AT-A-T-A-T-C-GG---A-A-C-GT-G-C-C-CAG--TA-G-T-G-G--G-G-G---AT-AA-C--TG--C-T-C-G-A-A-A-----…
>H97X84I02G6XUV
A-A-C-G-A--A-C-G-C--T-G-G-C-G-G--C-A-T-G--C---C-T--AA-C--AC-A-T-G--C-A-A-G--T-C--GA-A-CG-A---------G-A--------------------------------------------------C-C------------------------TTC-G------------------------------G--G------------------------------------------TC--T-------AG-T-G-G-C-GC-A--C--G-GG-T-G-C-G-T-A--AC-G-C-G-T-G-GG---A-A-T-CT-G-C-C-CTT--GG-G-T-T-C--G-G-A---AT-AA-C--TC--G-C-C-G-A-A-A-----…
>H97X84I02G6I02
A-A-C-G-A--A-C-G-C--T-G-G-C-G-G--C-A-T-G--C---C-T--AA-C--AC-A-T-G--C-A-A-G--T-C--GA-A-CG-G---------A-G------T--A----------CCCTCG---------------AA-A-G-A-G-AT-----------------------TTCGG------------------------------T--C----A-A-T--G-G--AGAG------------G-AC---T-ACT--T-------AG-T-G-G-C-GG-A--C--G-GG-T-G-A-G-T-A--AC-G-C-G-T-G-AG---GAA-C-CT-G-C-C-TTT--CA-G-T-G-G--G-G-G---AC-AA-C--AG--T-T-G-G-A-A-A-----…
>H97X84I02G44TQ
G-A-T-G-A--A-C-G-C--T-A-G-C-G-G--G-A-G-G--C---C-T--AA-C--AC-A-T-G--C-A-A-G--C-C--GA-G-CG-----------G-TA---G-A--G------------------------------------G-T-T-C------------------------TTC-G------------------------------G--A--A-T---------------------------C-T----T--GA--G-------AG-C-G-G-C-GT-A--C--G-GG-T-G-C-G-G-A--AC-A-C-G-T-G-TG---CAA-C-CT-G-C-C-TTT--AT-C-A-G-G--G-G-G---AT-AG-C--CT--T-T-C-G-A-A-A-----…
>H97X84I02G2645
A-A-C-G-A--A-C-G-C--T-G-G-C-G-G--C-A-T-G--C---C-T--AA-C--AC-A-T-G--C-A-A-G--T-C--GA-G-GG-----------G-CAG--C-G--G----------------G--------------GG-A-G-T-A--------------------------GCA-A---------------------------------T--A-C-T-C--CC-----------------G-C-C----G--GC--G-------AC-C-G-G-C-GC-A--C--G-GG-T-G-A-G-T-A--AC-A-C-G-T-A-TG---AAA-C-CT-G-C-C-CGT--AG-C-A-G-G--G-G-G---AT-AA-G--CG--G-A-A-G-A-A-A-----…
>H97X84I02G1EQW
G-A-T-G-A--A-C-G-C--T-A-G-C-G-G--C-A-G-G--C---T-T--AA-C--AC-A-T-G--C-A-A-G--T-C--GC-G-GG-----------G-CAG--C-G--G----------------G--------------GGAT-G-A----G-----------------------CTT-G----------------CT------------C--A--T-C---C--C------------------G-C-C----G--GC--G-------AC-C-G-G-C-GC-A--C--G-GG-T-G-A-G-T-A--AC-A-C-A-T-A-TG---CAA-C-CT-G-C-C-CCT--GT-C-A-G-G--G-G-G---AC-GA-C--CC--A-C-C-G-A-A-A-----…
>H97X84I02FX9ZJ
A-A-C-G-A--A-C-G-C--T-G-G-C-G-G--C-A-T-G--C---C-T--AA-C--AC-A-T-G--C-A-A-G--T-C--GA-A-CG-----------G-TAA--C-A--G--------------------------------------G-T-C------------------------TTC-G------------------------------G--A--T---------------------------G-C-T----G--AC--G-------AG-T-G-G-C-GA-A--C--G-GG-T-G-A-G-T-A--AT-A-C-A-T-C-GG---A-A-C-GT-G-C-C-CAG--AC-G-T-G-G--G-G-G---AT-AA-C--GA--G-G-C-G-A-A-A-----…
>H97X84I02FVGSB
A-A-C-G-A--A-C-G-C--T-G-G-C-G-G--C-A-T-G--C---C-T--AA-T--AC-A-T-G--C-A-A-G--T-C--GA-A-CG-A---------G-A--------------------------------------------------C-C------------------------TTC-G------------------------------G--G------------------------------------------TC--T-------AG-T-G-G-C-GC-A--C--G-GG-T-G-C-G-T-A--AC-G-C-A-T-G-GG---A-A-T-CC-G-C-C-CTT--GG-G-T-T-C--G-G-A---AT-AA-C--TC--G-C-C-G-A-A-A-----…
>H97X84I02FV25C
G-A-C-G-A--A-C-G-C--T-G-G-C-G-G--C-A-T-G--C---C-T--AA-T--AC-A-T-G--C-A-A-G--T-C--GA-A-CG-C---------T-G----A-A--G-------------------------------CA-C-T-C-T-G------------------------CTT-G------------------------------C--A--G-A-G-T--G--------------------T-G----G--AT--G-------AG-T-G-G-C-GA-A--C--G-GG-T-G-A-G-T-A--AC-A-C-G-T-G-GG---GAA-T-CT-G-C-C-TAG--GA-G-T-G-G--G-G-G---AT-AA-C--AT--T-C-G-G-A-A-A-----…
>H97X84I02FUR9D
G-A-C-G-A--A-C-G-C--T-G-G-C-G-G--C-A-T-G--C---C-T--AA-C--AC-A-T-G--C-A-A-G--T-C--GA-A-CG-A---------G-A--------------------------------------------------C-C------------------------TTC-G------------------------------G--G------------------------------------------TC--T-------AG-T-G-G-C-GC-A--C--G-GG-T-G-C-G-T-A--AC-G-C-G-T-G-GG---A-A-T-CT-G-C-C-CTT--GG-G-T-T-C--G-G-A---AT-AA-C--TC--G-C-C-G-A-A-A-----…
>H97X84I02FP03X
A---T-G-A--A-C-G-C--T-A-G-C-G-G--C-A-T-G--C---C-T--TA-C--AC-A-T-G--C-A-A-G--T-C--GA-A-CG-----------G-TAA--C-A--G--------------------------------------G-T-C------------------------TTC-G------------------------------G--A--T---------------------------G-C-T----G--AC--G-------AG-T-G-G-C-GA-A--C--G-GG-T-G-A-G-T-A--AT-A-C-A-T-C-GG---A-A-C-GT-G-C-C-CGA--TC-G-T-G-G--G-G-G---AT-AA-C--GA--A-G-C-G-A-A-A-----…
>H97X84I02FMAYO
A-T-T-G-A--A-C-G-C--T-G-G-C-G-G--C-A-T-G--C---C-T--TA-C--AC-A-T-G--C-A-A-G--T-C--GA-A-CG-----------G-TA-----A--C------------------------------------G-G-G--------------------------TCC-T------------------------------T--CGGGAT-------------------------G-C-T----G--AC--G-------AG-T-G-G-C-GA-A--C--G-GG-T-G-A-G-T-A--AT-A-T-A-T-C-GG---A-A-C-GT-G-C-C-CAG--TA-G-T-G-G--G-G-G---AT-GA-C--TG--C-T-C-G-A-A-A-----…
>H97X84I02FKWG7
A-T-T-G-A--A-C-G-C--T-G-G-C-G-G--C-A-T-G--C---C-T--TA-C--AC-A-T-G--C-A-A-G--T-C--GA-A-CG-----------G-TA-----A--C------------------------------------G-G-G--------------------------TCC-T------------------------------T--CGGAAT-------------------------G-C-C----G--AC--G-------AG-T-G-G-C-GA-A--C--G-GG-T-G-A-G-T-A--AT-A-T-A-T-C-GG---A-A-C-GT-G-C-C-CAG--TA-G-T-G-G--G-G-G---AT-AA-C--TG--C-T-C-G-A-A-A-----…
>H97X84I02FJCMS
G-A-T-G-A--A-C-G-C--T-A-G-C-G-A--C-A-G-G--C---T-T--AA-C--AC-A-T-G--C-A-A-G--T-C--GA-G-GG-----------G-CAG--C-G--G----------------G--------------GG-T-G-A-T-GG-----------------------CTT-G----------------C-------------C--A--T-C-A-C--CT-----------------G-C-C----G--GC--G-------AC-C-G-G-C-GT-A--C--G-GG-T-G-A-G-T-A--GC-A-C-G-T-A-TG---CAA-C-CT-G-C-C-CGC--CA-C-A-G-G--G-G-G---AT-AA-G--CG--G-A-A-G-A-A-A-----…
>H97X84I02FIHHE
G-A-T-G-A--A-C-G-C--T-A-G-C-G-G--C-A-G-G--C---T-T--AA-C--AC-A-T-G--C-A-A-G--T-C--GC-G-GG-----------G-CAG--C-G--G----------------G--------------GGAT-G-A----G-----------------------CTT-G----------------CT------------C--A--T-C---C--C------------------G-C-C----G--GC--G-------AC-C-G-G-C-GC-A--C--G-GG-T-G-A-G-T-A--AC-A-C-G-T-A-TG---CAA-C-CT-G-C-C-CCT--GT-C-A-G-G--G-G-G---AC-AA-C--CC--A-C-C-G-A-A-A-----…
>H97X84I02FI8UL
G-A-T-G-A--A-C-G-C--T-A-G-C-G-G--C-A-G-G--C---T-T--AA-C--AC-A-T-G--C-A-A-G--T-C--GC-G-GG-----------G-CAG--C----G----------------G--------------GG-T-G-A-T-GG-----------------------CTT-G----------------C-------------C--A--T-C-A-C--CT-----------------G-C-C----G--GC--G-------AC-C-G-G-C-GC-A--C--G-GG-T-G-A-G-T-A--AC-A-C-G-T-A-TG---CAA-C-CT-G-C-C-CGC--CA-C-A-G-G--G-G-G---AT-AA-G--CG--G-A-A-G-A-A-A-----…
>H97X84I02FH6TR
A-T-T-G-A--A-C-G-C--T-G-G---G-G--C-A-T-G--C---C-T--TA-C--AC-A-T-G--C-A-A-G--T-C--GA-A-CG-----------G-TAA--C-A--G----------------------------------------G--------------------------TT--A---------------------------------A------------------------------G-C-T----G--AC--G-------AG-T-G-G-C-GA-A--C--G-GG-T-G-A-G-T-A--AT-A-T-A-T-C-GG---A-A-C-GT-G-C-C-CAG--TC-G-T-G-G--G-G-G---AT-AA-C--TG--C-T-C-G-A-A-A-----…
>H97X84I02F8JU5
A---T-G-A--A-C-G-C--T-A-G-C-G-A--C-A-G-G--C---T-T--AA-C--AC-A-T-G--C-A-A-G--T-C--GA-G-CG-G---------G-C------------------------------------------------G-T-A------------------------GCA-A------------------------------T--A--C---------------------------------------GT--C-------AG-C-G-G-C-AG-A--C--G-GG-T-G-A-G-T-A--AC-G-C-G-T-G-GG---A-A-C-GT-A-C-C-TTT--TG-G-T-T-C--G-G-A---AC-AA-C--AC--A-G-G-G-A-A-A-----…
>H97X84I02F76DR
G-A-T-G-A--A-C-G-C--T-G-G-C-G-G--C-G-T-G--C---C-T--AA-C--AC-A-T-G--C-A-A-G--T-C--GA-A-CG-G---------G-G----T-A--T---------ATAAG-----------------CG-G-A-A-G-T------------------------TTACG------------------------------GA-T--G-G-A-A--G-G--T-TAT-----------A-T----A--CC--C-------AG-T-G-G-C-GG-A--C--G-GG-T-G-A-G-T-A--AC-G-C-G-T-G-AG---CAA-C-CT-G-C-C-CCG--TG-C-C-G-G--G-G-G---AT-AC-C--GC--C-T-G-G-A-G-A----C…
>H97X84I02F1IOC
A-T-T-G-A--A-C-G-C--T-G-G-C-G-G--C-A-T-G--C---C-T--TA-C--AC-A-T-G--C-A-A-G--T-C--GA-A-CG-----------G-TAA--C-A--G--------------------------------------G-T-C------------------------TTC-G------------------------------G--A--T---------------------------G-C-T----G--AC--G-------AG-T-G-G-C-GA-A--C--G-GG-T-G-A-G-T-A--AT-A-C-A-T-C-GG---A-A-C-GT-G-C-C-CGA--TC-G-T-G-G--G-G-G---GT-AT-C--GA--A-G-C-G-A-A-A-----…
>H97X84I02F0K3L
G-A-C-G-A--A-C-G-C--T-G-G-C-G-G--C-G-T-G--C---T-T--AA-C--AC-A-T-G--C-A-A-G--T-C--GA-G--G-----------G-G----C-A--G----------CGGGG-T--------------AG-G-A-A-G-C------------------------TT---------------------------------G--C--T-T-T-C--TGC----CG------------C-C----GG-C---G-------AC-C-G-G-C-GC-A--C--G-GG-T-G-A-G-T-A--AC-G-C-G-T-G-GA---TAA-C-CT-G-C-C-CCA--TA-C-C-G-G--G-G-G---AT-AA-C--AG--C-C-G-G-A-A-A-----…
>H97X84I02GRELN
G-A-C-G-A--A-C-G-C--T-G-G-C-G-G--C-A-T-G--C---C-T--AA-T--AC-A-T-G--C-A-A-G--T-C--GA-G-CG-A---------A-C----A-G--A--------------------------------CGA-G-G-A-G------------------------CTT-G------------------------------C--T--C-CTC-T-----------------------C-T----CT-GT--T-------AG-C-G-G-C-GA-A--T--G-GG-T-G-A-G-T-A--AC-A-C-G-T-G-GG---CAA-C-CT-G-C-C-CTG--TA-G-T-T-G--G-G-G---AT-AA-C--TC--C-G-G-G-A-A-A-----…
>H97X84I02GHYEH
A-A-C-G-A--A-C-G-C--T-G-G-C-G-G--C-A-T-G--C---C-T--AA-C--AC-A-T-G--C-A-A-G--T-C--GA-A-CG-A---------A-G--------------------------------------------------G-C------------------------TTC-G------------------------------G--C------------------------------------------CT--T-------AG-T-G-G-C-GC-A--C--G-GG-T-G-C-G-T-A--AC-G-C-G-T-G-GG---A-A-T-CT-G-C-C-CTT--TG-G-T-T-C--G-G-A---AT-AA-C--AG--C-G-A-G-A-A-A-----…
>H97X84I02G7296
A-T-T-G-A--A-C-G-C--T-G-G-C-G-G--C-A-T-G--C---C-T--TA-C--AC-A-T-G--C-A-A-G--T-C--GA-A-CG-----------G-TAA--C-A--G--------------------------------------G-T-C------------------------TTC-G------------------------------G--A--T---------------------------G-C-T----G--AC--G-------AG-T-G-G-C-GA-A--C--G-GG-T-G-A-G-T-A--AT-A-C-A-T-C-GG---A-A-C-GT-G-C-C-CAG--AC-G-T-G-G--G-G-G---AT-AA-C--GA--G-G-C-G-A-A-A-----…
>H97X84I02IUQKJ
G-A-C-G-A--A-C-G-C--T-G-G-C-G-G--C-G-T-G--C---T-T--AA-C--AC-A-T-G--C-A-A-G--T-C--GA-A-CG-----------G-AA---A-G--G--------------------------------C-C-C---T-G------------------------CTT-G------------------------------C--A----G-G-G-----------------------T-A----C--TC--G-------AG-T-G-G-C-GA-A--C--G-GG-T-G-A-G-T-A--AC-A-C-G-T-G-GG---TGA-T-CT-G-C-C-CTG--CA-C-T-T-C--G-G-G---AT-AA-G--CC--T-G-G-G-A-A-A-----…
>H97X84I02HB1GC
G-A-C-G-A--A-C-G-C--T-G-G-C-G-G--C-G-T-G--C---T-T--AA-C--AC-A-T-G--C-A-A-G--T-C--GA-ACGG-A---------G-T----A----C----------CCTCG-A--------------AA-G-A-G-A-T------------------------TTC-G------------------------------G--T--C-A-A-T--GG---AGAG------------G-A----C--TA--CTT-----AG-T-G-G-C-GG-A--C--G-GG-T-G-A-G-T-A--AC-G-C-G-T-G-AG---GAA-C-CT-G-C-C-TTT--CA-G-T-G-G--G-G-G---AC-AA-C--AG--T-T-G-G-A-A-A-----…
>H97X84I02FMLGE
G-A-T-G-A--A-C-G-C--T-G-G-C-G-G--C-G-T-G--C---C-T--AA-C--AC-A-T-G--C-A-A-G--T-C--GA-A-CG-A---------A-G----C----G---------TTTCGG-A--------------GG-A-A-G-T-T------------------------TTC-G------------------------------G--A--T-G-G-A---AT--CTGGA-----------A-T----GA-CT--G-------AG-T-G-G-C-GG-A--C--G-GG-T-G-A-G-T-A--AC-G-C-G-T-G-GG---TAA-C-CT-G-C-C-CTG--TA-C-T-G-G--G-G-G---AC-AA-C--AG--T-T-A-G-A-A-A-----…
>H97X84I02F4ICU
G-A-T-G-A--A-C-G-C--T-G-G-C-G-G--C-G-T-G--C---T-T--AA-C--AC-A-T-G--C-A-A-G--T-C--GA-A-CG-G---------G-C------T--CA-----------------------------TAT-T-GAA-A-C------------------------CTA-G------------------------------T--G--A-T-T-T--A--------------------T------GA-GT--T-------AG-T-G-G-C-GG-A--C--G-GG-T-G-A-G-T-A--AC-G-C-G-T-G-GA---AAA-C-CT-G-C-C-GTA--TA-C-T-G-G--G-G-G---AT-AA-C--AC--T-T-A-G-A-A-A-----…
>H97X84I02G0X28
A-G-T-G-A--A-C-G-C--T-G-G-C-G-G--T-A-G-G--C---C-T--AA-C--AC-A-T-G--C-A-A-G--T-C--GA-A-CG-----------G-CAG--C-A--C----------------A--------------GT-A-A-G-A-G------------------------CTT-G------------------------------C--T--C-T-T-A--TG-----------------G-G-T----G--GC--G-------AG-T-G-G-C-GG-A--C--G-GG-T-G-A-G-G-A--AT-A-C-A-T-C-GG---A-A-T-CT-A-C-T-CTG--TC-G-T-G-G--G-G-G---AT-AA-C--GT--A-G-G-G-A-A-A-----…
>H97X84I02GFHMS
G-A-C-G-A--A-C-G-C--T-G-G-C-G-G--C-A-T-G--C---C-T--AA-T--AC-A-T-G--C-A-A-G--T-C--GA-A-CG-C---------T-G----A-A--G-------------------------------CA-C-T-C-T-G------------------------CTT-G------------------------------C--A--G-A-G-T--G--------------------C-G----G--AT--G-------AG-T-G-G-C-GA-A--C--G-GG-T-G-A-G-T-A--AC-A-C-G-T-G-GG---GAA-T-CT-G-C-C-TAT--AA-G-T-G-G--G-G-G---AT-AA-C--AT--T-C-G-G-A-A-A-----…
>H97X84I02H8K2V
G-A-C-G-A--A-C-G-C--T-G-G-C-G-G--C-G-T-G--C---C-T--AA-T--AC-A-T-G--C-A-A-G--T-A--GA-A-CG-C---------T-G----A-A--G--------------------------------G-A-G-G-A-G------------------------CTT-G------------------------------C--T--T-C-T-C-----------------------T-G----G--AT--G-------AG-T-T-G-C-GA-A--C--G-GG-T-G-A-G-T-A--AC-G-C-G-T-A-GG---TAA-C-CT-G-C-C-TGG--TA-G-C-G-G--G-G-G---AT-AA-C--TA--T-T-G-G-A-A-A-----…
>H97X84I02H5B7S
A-G-C-G-A--A-C-G-C--T-G-G-C-G-G--C-A-G-G--C---T-T--AA-C--AC-A-T-G--C-A-A-G--T-C--GA-G-CG-G---------G-C------------------------------------------------A-T-A------------------------GCA-A------------------------------T--A--T---------------------------------------GT--C-------AG-C-G-G-C-AG-A--C--G-GG-T-G-A-G-T-A--AC-G-C-G-T-G-GG---A-A-C-GT-A-C-C-TTT--TG-G-T-T-C--G-G-A---AC-AA-C--AC--A-G-G-G-A-A-A-----…
>H97X84I02JOS0Z
G-A-T-G-A--A-C-G-C--T-G-G-C-G-G--C-G-T-G--C---C-T--AA-T--AC-A-T-G--C-A-A-G--T-C--GA-G-CG-A---------A-C----A-G--A-------------------------------TG-A-G-A-A-G------------------------CTT-G------------------------------C--T--T-C-T-C--T--------------------G-A----T--GT--T-------AG-C-G-G-C-GG-A--C--G-GG-T-G-A-G-T-A--AC-A-C-G-T-G-GG---TAA-C-CT-A-C-C-TAT--AA-G-A-C-T--G-G-G---AT-AA-C--TC--C-G-G-G-A-A-A-----…
>H97X84I02FQFL5
G-A-C-G-A--A-C-G-C--T-G-G-C-G-G--C-G-T-G--C---T-T--AA-C--AC-A-T-G--C-A-A-G--T-C--GA-A-CG-G---------A-T----T-G--C----------------G--------------CC-T---G----------------------------C-TTTT-----------------------------------G-T-G-G--GT-------------------G-T----G--GT--T-------AG-T-G-G-C-GA-A--C--G-GG-T-G-A-G-T-A--AC-A-C-G-T-G-AG---TAA-C-CT-G-C-C-CCC--TT-C-T-T-T--G-G-G---AT-AA-G--CT--C-C-T-G-A-A-A-----…
>H97X84I02FLCF4
A-G-C-G-A--A-C-G-C--T-G-G-C-G-G--C-A-G-G--C---T-T--AA-C--AC-A-T-G--C-A-A-G--T-C--GA-G-CG-G---------G-C------------------------------------------------G-T-A------------------------GCA-A------------------------------T--A--C---------------------------------------GT--C-------AG-C-G-G-C-AG-A--C--G-GG-T-G-A-G-T-A--AC-A-C-G-T-G-GG---A-A-C-GT-A-C-C-TTT--TG-G-T-T-C--G-G-A---AC-AA-C--TG--A-G-G-G-A-A-A-----…
>H97X84I02JG7PE
A-T-T-G-A--A-C-G-C--T-G-G-C-G-G--C-A-G-G--C---C-T--AA-C--AC-A-T-G--C-A-A-G--T-C--GA-G-CG-----------G-AT---G-A--G----------------------------------A-G-G-A-G------------------------CTT-G------------------------------C--T--C-C-T-------------------------T-G----A--TT--T-------AG-C-G-G-C-GG-A--C--G-GG-T-G-A-G-T-A--AT-G-C-C-T-A-GG---A-A-T-CT-G-C-C-TGG--TA-G-T-G-G--G-G-G---AT-AA-C--GT--C-C-G-G-A-A-A-----…
>H97X84I02F58YA
G-A-C-G-A--A-C-G-C--T-G-G-C-G-G--C-G-T-G--C---C-T--AA-T--AC-A-T-G--C-A-A-G--T-C--GA-A-CG-A---------G-A----G-C--G-------------------------------AC-C-G-G-T-G------------------------CTT-G------------------------------C--A--C-T-G-G--T--------------------C-A----A--TC--T-------AG-T-G-G-C-GA-A--C--G-GG-T-G-A-G-T-A--AC-A-C-G-T-G-GG---TAA-C-CT-G-C-C-CAT--CA-G-A-G-G--G-G-G---AT-AA-C--AT--C-C-G-G-A-A-A-----…
>H97X84I02I9L4U
A-A-C-G-A--A-C-G-C--T-G-G-C-G-G--C-A-T-G--C---C-T--AA-C--AC-A-T-G--C-A-A-G--T-C--GA-A-CG-A---------A-G--------------------------------------------------G-C------------------------TTC-G------------------------------G--C------------------------------------------CT--T-------AG-T-G-G-C-GC-A--C--G-GG-T-G-C-G-T-A--AC-G-C-G-T-G-GG---A-A-T-CT-G-C-C-CTT--GG-G-T-T-C--G-G-A---AT-AA-C--TC--G-C-C-G-A-A-A-----…
>H97X84I02HHW9G
G-A-C-G-A--A-C-G-C--T-G-G-C-G-G--C-G-T-G--C---T-T--AA-C--AC-A-T-G--C-A-A-G--T-C--GA-A-CG-A---------G-A--------------------------------------------------C-C------------------------TTC-G------------------------------G--G------------------------------------------TC--T-------AG-T-G-G-C-GC-A--C--G-GG-T-G-C-G-T-A--AC-G-C-G-T-G-GG---A-A-T-CT-G-C-C-CTT--GG-G-T-T-C--G-G-A---AT-AA-C--TC--G-C-C-G-A-A-A-----…
>H97X84I02FZBWE
G-A-T-G-A--A-C-G-C--T-G-G-C-G-G--C-G-T-G--C---T-T--AA-C--AC-A-T-G--C-A-A-G--T-C--GA-A-CG-G---------G-C------T--CA-----------------------------TAT-T-GAA-A-C------------------------CTA-G------------------------------T--G--A-T-T-T--A--------------------T------GA-GT--T-------AG-T-G-G-C-GG-A--C--G-GG-T-G-A-G-T-A--AC-G-C-G-T-G--G---AAAGC-CT-G-C-C-GTA--TA-C-T-G-G--G-G-G---AT-AA-C--AC--T-T-A-G-A-A-A-----…
>H97X84I02J55WF
G-A-C-G-A--A-C-G-C--T-G-G-C-G-G--C-A-T-G--C---C-T--AA-T--AC-A-T-G--C-A-A-G--T-C--GA-A-CG-C---------T-G----A-A--G-------------------------------CA-C-T-C-T-G------------------------CTT-G------------------------------C--A--G-A-G-T--G--------------------C-G----G--AT--G-------AG-T-G-G-C-GA-A--C--G-GG-T-G-A-G-T-A--AC-A-C-G-T-G-GG---AAA-T-CT-G-C-C-TAT--AA-G-T-G-G--G-G-G---AT-AA-C--AT--T-C-G-G-A-A-A-----…
>H97X84I02HHA7Z
A-A-C-G-A--A-C-G-C--T-G-G-C-G-G--C-A-T-G--C---C-T--AA-C--AC-A-T-G--C-A-A-G--T-C--GA-A-CG-A---------G-A--------------------------------------------------C-C------------------------TTC--------------------------------G--G--G---------------------------------------TC--T-------AG-T-G-G-C-GC-A--C--G-GG-T-G-C-G-T-A--AC-G-C-G-T-G-GG---A-A-T-CT-G-C-C-CTT--TG-G-T-T-C--G-G-A---AT-AA-C--AG--C-G-A-G-A-A-A-----…
>H97X84I02GTP5K
A-T-T-G-A--A-C-G-C--T-G-G-C-G-G--C-A-T-G--C---C-T--TA-C--AC-A-T-G--C-A-G-G--T-C--GA-A-CG-----------G-TAA--C-A--G--------------------------------------G-T-C------------------------CTC-G------------------------------G--A--T---------------------------G-C-T----G--AC--G-------AG-T-G-G-C-GA-A--C--G-GG-T-G-A-G-T-A--AT-A-C-A-T-C-GG---A-A-C-GT-G-C-C-CGA--TC-G-T-G-G--G-G-G---AT-AA-C--GA--A-G-C-G-A-A-A-----…
>H97X84I02JPMDG
A-T-T-G-A--A-C-G-C--T-G-G-C-G-G--C-G-T-G--C---C-T--TA-C--AC-A-T-G--C-A-G-G--T-C--GA-A-CG-----------G-TAA--C-A--G--------------------------------------G-T-C------------------------CTC-G------------------------------G--A--T---------------------------G-C-T----G--AC--G-------AG-T-G-G-C-GA-A--C--G-GG-T-G-A-G-T-A--AT-A-C-A-T-C-GG---A-A-C-GT-G-C-C-CGA--TC-G-T-G-G--G-G-G---AT-AA-C--GA--G-G-C-G-A-A-A-----…
>H97X84I02HFYEZ
G-A-T-G-A--A-C-G-C--T-G-G-C-G-G--C-G-T-G--C---C-T--AA-T--AC-A-T-G--C-A-A-G--T-C--GA-G-CG-A---------A-C----A-G--A-------------------------------TG-A-G-A-A-G------------------------CTT-G------------------------------C--T--T-C-T-C--T--------------------G-A----T--GT--T-------AG-C-G-G-C-GG-A--C--G-GG-T-G-A-G-T-A--AC-A-C-G-T-G-GG---TAA-C-CT-A-C-C-TAT--AA-G-A-C-T--G-G-G---AT-AA-C--TC--C-G-G-G-A-A-A-----…
>H97X84I02GR4J7
A---C-G-A--A-C-G-C--T-G-G-C-G-G--C-A-T-G--C---C-T--TA-C--AC-A-T-G--C-A-A-G--T-C--GA-A-CG-----------G-TAA--C-A--G--------------------------------------G-T-C------------------------TTC-G------------------------------G--A--T---------------------------G-C-T----G--AC--G-------AG-T-G-G-C-GA-A--C--G-GG-T-G-A-G-T-A--AT-A-C-A-T-C-GG---A-A-C-GT-G-C-C-CGA--TC-G-T-G-G--G-G-G---AT-AA-C--GA--G-G-C-G-A-A-A-----…
>H97X84I02IRTSW
G-ATT-G-A--A-C-G-C--T-G-G-C-G-G--C-A-T-G--C---C-T--TA-C--AC-A-T-G--C-A-A-G--T-C--GC-G-GG-----------G-CAG--C-G--G----------------G--------------GGAT-G-A----G-----------------------CTT-G----------------CT------------T--A--T-C---C--C------------------G-C-C----G--GC--G-------AC-C-G-G-C-GC-A--C--G-GG-T-G-A-G-T-A--AC-A-C-G-T-A-TG---CAA-C-CT-G-C-C-CCT--GT-C-A-G-G--G-G-G---AC-AA-C--CC--A-C-C-G-A-A-A-----…
>H97X84I02F9XER
A-A-C-G-A--A-C-G-C--T-G-G-C-G-G--C-A-T-G--C---C-T--AA-C--AC-A-T-G--C-A-A-G--T-C--GA-A-CG-A---------G-A--------------------------------------------------C-C------------------------TTC--------------------------------G--G--G---------------------------------------TC--T-------AG-T-G-G-C-GC-A--C--G-GG-T-G-C-G-T-A--AC-G-C-G-T-G-GG---A-A-T-CT-G-C-C-CTT--GG-G-T-T-C--G-G-A---AT-AA-CT-CG--C---C-G-A-A-A-----…
>H97X84I02H4FQK
A-G-T-G-A--A-C-G-C--T-G-G-C-G-G--T-A-G-G--C---C-T--AA-C--AC-A-T-G--C-A-A-G--T-C--GA-A-TG-----------GCAGCA-C-A--GTAA-----------------------------------GAG-CT---------------------TGCTC-T------------------------------T--A--TG--------------------------G-G-T----G--GC--G-------AG-T-G-G-C-GG-A--C--G-GG-T-G-A-G-G-A--AT-A-C-A-T-C-GG---A-A-C-GT-G-C-C-CGA--TC-G-T-G-G--G-G-G---AT-AA-C--GA--A-G-C-G-A-A-A-----…
>H97X84I02JDCL1
G-A-T-G-A--A-C-G-C--T-G-G-C-G-G--C-G-T-G--C---T-T--AA-C--AC-A-T-G--C-A-A-G--T---------CG-A---------A------C--------------GG-GCT-C--------------AT-A-T-T-G-A------------------------AAC--------------------------------C--T--A---G----TG---ATTT-------------AT----GA-GT--T-------AG-T-G-G-C-GG-A--C--G-GG-T-G-A-G-T-A--AC-G-C-G-T-G-GA---AAA-C-CT-G-C-C-GTA--TA-C-T-G-G--G-G-G---AT-AA-C--AC--T-T-A-G-A-A-A-----…
>H97X84I02G52JO
A-A-C-G-A--A-C-G-C--T-G-G-C-G-G--C-A-T-G--C---C-T--AA-C--AC-A-T-G--C-A-A-G--T-C--GA-A-C--G---------A--------A------------CC---G-C--------------A----A-----C------------------------TT--G------------------------------A--A--C---T-T--GTT--CTCGT-----------T-A----AG-GT--T-------AG-T-G-G-C-GC-A--C--G-GG-T-G-A-G-T-A--AC-A-C-G-T-G-GG---GAA-C-CT-G-C-C-CTT--TA-G-T-G-G--G-G-G---AT-AA-C--AG--T-C-G-G-A-A-A-----…
>H97X84I02IYIRG
A-T-T-G-A--A-C-G-C--T-G-G-C-G-G--C-A-T-G--C---C-T--TA-C--AC-A-T-G--C-A-G-G--T-C--GA-A-CG-----------G-TAA--C-A--G--------------------------------------G-T-C------------------------CTC-G------------------------------G--A--T---------------------------G-C-T----G--AC--G-------AG-T-G-G-C-GA-A--C--G-GG-T-G-A-G-T-A--AT-A-C-A-T-C-GG---A-A-C-GT-G-C-C-C-G-ATC-G-T-G-G--G-G-G---AT-AA-C--GA--G-G-C-G-A-A-A-----…
>H97X84I02IX0BY
G-A-C-G-A--A-C-G-C--T-G-G-C-G-G--T-G-T-G--C---T-T--CA-C--AC-A-T-G--C-A-A-G--T-C--GA-A-CG-A---------G-A--------------------------------------------------C-C------------------------TTC-G------------------------------G--G------------------------------------------TC--T-------AG-T-G-G-C-GC-A--C--G-GG-T-G-C-G-T-A--AC-G-C-G-T-G-GG---A-A-T-CT-G-C-C-CTT--GG-G-T-T-C--G-G-A---AT-AA-C--TC--G-C-C-G-A-A-G-----…
>H97X84I02G2HHJ
G-A-C-G-A--A-C-G-C--T-G-G-C-G-G--C-G-T-G--C---C-T--AA-T--AC-A-T-G--C-A-A-G--T-C--GA-A-CGAACC-------GCAA---------------------------------------------CTTGAACTTGT-------------------TCTC-GTTAA--------------------------G--G------------------------------------------T---T-------AG-T-G-G-C-GC-A--C--G-GG-T-G-A-G-T-A--AC-A-C-G-TGG-GG---A-A-C-CT-G-C-C-CTT--GG-G-T-T-C--G-G-A---AT-AA-C--TC--G-C-C-G-A-A-A-----…
>H97X84I02GP4XP
G-A-C-G-A--A-C-G-C--T-G-G-C-G-G--C-G-T-G--C---C-T--AA-T--AC-A-T-G--C-A-A-G--T-C--GA-A-CG-----------A--------A--C------------CGC-A--------------AC-T-T-G-A-A------------------------CTT-G------------------------------T--T--C-T-C----GTT--AA--------------G-G--------T--T-------AG-T-G-G-C-GC-A--C--G-GG-T-G-A-G-T-A--AC-A-C-G-T-G-GG---GAA-C-CT-G-C-C-CTT--TA-G-T-G-G--G-G-G---AT-AA-C--AG--T-C-G-G-A-A-A-----…
>H97X84I02IKLDU
G-A-C-G-A--A-C-G-C--T-G-G-C-G-G--C-A-T-G--C---C-T--AA-T--AC-A-T-G--C-A-A-G--T-C--GA-G-CG-A---------A-C----A-G--A-------------------------------CG-A-G-G-A-G------------------------CTT-G------------------------------C--T--C-C-T-C--TC-------------------T-C----T--GT--T-------AG-C-G-G-C-GA-A--T--G-GG-T-G-A-G-T-A--AC-A-C-G-T-G-GG---CAA-C-CTGC-C-C-TGT---A-G-T-T-G--G-G-G---AT-AA-C--TC--C-G-G-G-A-A-A-----…
>H97X84I02II5CW
G-A-C-G-A--A-C-G-C--T-G-G-C-G-G--C-G-T-G--C---T-T--AA-C--AC-A-T-G--C-A-A-G--T-C--GA-A-CG-G---------A-G----T-A------------CCCTCG-A--------------AA-G-A-G-A-T------------------------TTC-G------------------------------G--T--C-A-A-T--GGA--GAGGA-----------C-T----A--CT--T-------AG-T-G-G-C-GG-A--C--G-GG-T-G-A-G-T-A--AC-G-C-G-T-G-AG---GAA-C-CT-A-C-C-TTT--CA-G-T-G-G--G-G-G---AC-AA-C--AG--T-T-G-G-A-A-A-----…
>H97X84I02IC47Q
T---T-G-A--A-C-G-C--T-G-G-C-G-G--C-A-T-G--C---C-T--TA-C--AC-A-T-G--C-A-A-G--T-C--GA-A-CG-----------G-CAG--C-A--C----------------A--------------GT-A-A-G-A-G------------------------CTT-G------------------------------C--T--C-T-T-A--TG-----------------G-G-T----G--GC--G-------AG-T-G-G-C-GG-A--C--G-GG-T-G-A-G-G-A--AT-A-C-A-T-C-GG---A-A-T-CT-A-C-T-CTG--TC-G-T-G-G--G-G-G---AT-AA-C--GT--A-G-G-G-A-A-A-----…
>H97X84I02I9PUI
A-T-T-G-A--A-C-G-C--T-G-G-C-G-G--C-A-T-G--C---C-T--TA-C--AC-A-T-G--C-A-A-G--T-C--GA-A-CG-----------G-TAA--C-A--G--------------------------------------G-T-C------------------------CTC-G------------------------------G--A--T---------------------------G-C-T----G--AC--G-------AG-T-G-G-C-GA-A--C--G-GG-T-G-A-G-T-A--AT-A-C-A-T-C-GG---A-A-C-GT-G-C-C-CGA--TC-G-T-G-G--G-G-G---AT-AA-C--GA--G-G-C-G-A-A-A-----…
>H97X84I02G47SA
A-T-T-G-A--A-C-G-C--T-G-G-C-G-G--C-A-T-G--C---C-T--TA-C--AC-A-T-G--C-A-A-G--T-C--GA-A-CG-----------GCAGCA-C-G--G----------------------------------------A-C------------------------TTC-G------------------------------GT-C--T---------------------------G-G-T----G--GC--G-------AG-T-G-G-C-GA-A--C--G-GG-T-G-A-G-T-A--AT-A-C-A-T-C-GG---A-A-C-GT-G-C-CCAGA---C-G-T-G-G--G-G-G---AT-AA-C--TA--G-G-C-G-A-A-A-----…
>H97X84I02HTLQ7
G-T-T-G-A--A-C-G-C--T-G-G-C-G-G--C-A-T-G--C---C-T--TA-C--AC-A-T-G--C-A-G-G--T-C--GA-A-CG-----------G-TAA--C-A--G--------------------------------------G-T-C------------------------CTC-G------------------------------G--A--T---------------------------G-C-T----G--AC--G-------AG-T-G-G-C-GA-A--C--G-GG-T-G-A-G-T-A--AT-A-C-A-T-C-GG---A-A-C-GT-G-C-C-CGA--TC-G-T-G-G--G-G-G---AT-AA-C--GA--A-G-C-G-A-A-A-----…
>H97X84I02J5BG3
G-A-C-G-A--A-C-G-C--T-G-G-C-G-G--C-G-T-G--C---C-T--AA-T--AC-A-T-G--C-A-A-G--T-C--GA-A-CG-A---------A------C----C---------GCAAC--T--------------TG-A---A-C--------------------------TTG-T------------------------------T--C--T-C-G-T--TAA--G-G-------------T-T-----A-GT--G--------G-C---G-C----A--C--G-GG-T-G-A-G-T-A--AC-A-C-G-C-G-GG---GAA-C-CT-G-C-C-CTT--TA-G-T-G-G--G-G-G---AT-AA-C--AC--T-T-A-G-A-A-A-----…
>H97X84I02HN0I9
A-T-T-G-A--A-C-G-C--T-G-G-C-G-G--C-A-T-G--C---C-T--TA-C--AC-A-T-G--C-A-A-G--T-C--GA-A-CG-----------G-TAA--C-A--G--------------------------------------G-T-C------------------------TTC-G------------------------------G--A--T---------------------------G-C-T----G--AC--G-------AG-T-G-G-C-GA-A--C--G-GG-T-G-A-G-T-A--AT-A-C-A-T-C-GG---A-A-C-GT-G-C-C-CGA--TC-G-T---G--G-G-G---AT-AA-C--GA--A-G-C-G-A-A-A-----…
>H97X84I02HKSIS
A-T-T-G-A--A-C-G-C--T-G-G-C-G-G--C-A-T-G--C---C-T--TA-C--AC-A-T-G--C-A-A-G--T-C--GA-A-CG-----------G-TAA--C-A--G--------------------------------------G-T-C------------------------TTC-G------------------------------G--A--T---------------------------G-C-T----G--AC--G-------AG-T-G-G-C-GA-A--C--G-GG-T-G-A-G-T-A--AT-A-C-A-T-C-GG---A-A-C-GT-G-C-C-CAG--AC-G-T-G-G--G-G-G---AT-AA-C--GA--G-G-C-G-A-A-A-----…
>H97X84I02HK740
G-T-T-G-A--A-C-G-C--T-G-G-C-G-G--C-A-T-G--C---C-T--AA-T--AC-A-T-G--C-A-A-G--T-C--GA-G-CG-A---------A-C----A-G--A--------------------------------CGA-G-G-A-G------------------------CTT-G------------------------------C--T--C-CTC-T-----------------------C-T----CT-GT--T-------AG-C-G-G-C-GA-A--T--G-GG-T-G-A-G-T-A--AC-A-C-G-T-G-GG---CAA-C-CT-G-C-C-CTG--TA-G-T-T-G--G-G-G---AT-AA-C--TC--C-G-G-G-A-A-A-----…
>H97X84I02HBK7X
A-T-T-G-A--A-C-G-C--T-G-G-C-G-G--C-A-T-G--C---C-T--TA-C--AC-A-T-G--C-A-A-G--T-C--GA-A-CG-----------G-TAA--C-A--G--------------------------------------G-T-C------------------------CTC-G------------------------------G--A--T---------------------------G-C-T----G--AC--G-------AG-T-G-G-C-GA-A--C--G-GG-T-G-A-G-T-A--AT-A-C-A-T-C-GG---A-A-C-GT-G-C-C-CGA--TC-G-T-G-G--G-G-G---AT-AA-C--GA--G-G-C-G-A-A-A-----…
>H97X84I02GH2UC
A-T-T-G-A--A-C-G-C--T-G-G-C-G-G--C-A-G-G--C---T-T--AA-C--AC-A-T-G--C-A-A-G--T-C--GA-A-CGAT---------G-A----A-A--C----------------------------------T-C-T-A-G------------------------CTT-G------------------------------C--T--A-G-A-------------------------G-A----AG-AT--T-------AG-T-G-G-C-GG-A--C--G-GG-T-G-A-G-T-A--AT-G-C-T-T-A-GG---A-A-T-CT-G-C-C-TAT--TA-G-T-G-G--G-G-G---AC-AA-C--AT--T-C-C-G-A-A-A-----…
>H97X84I02GXJD5
A-A-C-G-A--A-C-G-C--T-G-G-C-G-G--C-A-T-G--C---C-T--TA-C--AC-A-T-G--C-A-A-G--T-C--GA-A-CG-----------G-TAA--C-A--G--------------------------------------G-T-C------------------------CTC-G------------------------------G--A--T---------------------------G-C-T----G--AC--G-------AG-T-G-G-C-GA-A--C--G-GG-T-G-A-G-T-A--AT-A-C-A-T-C-GG---A-A-C-GT-G-C-C-CGA--TC-G-T-G-G--G-G-G---AT-AA-C--GA--G-G-C-G-A-A-A-----…
>H97X84I02GT6TN
G-ATT-G-A--A-C-G-C--T-G-G-C-G-G--C-G-T-G--C---C-T--AA-T--AC-A-T-G--C-A-A-G--T-A--GA-A-CG-C---------T-G----AGG--G----------------------------------A-G-G-A-G------------------------CTT-G------------------------------C--T--T-C-T-C-----------------------T-G----G--AT--G-------AG-T-T-G-C-GA-A--C--G-GG-T-G-A-G-T-A--AC-G-C-G-T-AG-G---TAA-C-CT-G-C-C-TGG--TA-G-C-G-G--G-G-G---AT-AA-C--TA--T-T-G-G-A-A-A-----…
>H97X84I02GQFYI
A-T-T-G-A--A-C-G-C--T-G-G-C-G-G--C-A-T-G--C---C-T--TA-C--AC-A-T-G--C-A-A-G--T-C--GA-A-CG-----------G-TAA--C-A--G--------------------------------------G-T-C------------------------TTC-G------------------------------G--A--T---------------------------G-C-T----G--AC--G-------AG-T-G-G-C-GA-A--C--G-GG-T-G-A-G-T-A--AT-A-C-A-T-C-GG---A-A-C-GT-G-C-C-CGA--TC-G-T-G-G--G-G-G---AT-AA-C--GA--A-G-C-G-A-A-A-----…
>H97X84I02GK8QC
G-A-C-G-A--A-C-G-C--T-G-G-C-G-G--C-G-T-G--C---C-T--AA-T--AC-A-T-G--C-A-A-G--T-C--GA-G-CG-A---------A-C----C-A--A-------------------------------TA-A-G-A-A-G------------------------CTT-G------------------------------C--T--T-T-T-T--G--------------------T-T----G--GT--T-------AG-C-G-G-C-GG-A--C--G-GG-T-G-A-G-T-A--AC-A-C-G-T-G-GG---TAA-C-CT-G-C-C-TGT--AA-G-A-T-C--G-G-G---AT-AA-C--TC--C-G-G-G-A-A-A-----…
>H97X84I02J2TDK
A-T-T-G-A--A-C-G-C--T-G-G-C-G-G--C-A-T-G--C---C-T--TA-C--AC-A-T-G--C-A-A-G--T-C--GA-A-CG-----------G-TA-----A--C----------------------------------A-G-G---T------------------------CTT--------------------------------C-----G-G-A----T------------------G-C-T----G--AC--G-------AG-T-G-G-C-GA-A--C--G-GG-T-G-A-G-T-A--AT-A-C-A-T-C-GG---A-A-C-GT-G-C-C-CGA--TC-G-T-G-G--G-G-G---AT-AA-C--GA--A-G-C-G-A-A-AG----…
>H97X84I02GFDWJ
G-A-T-G-A--A-C-G-C--T-G-G-C-G-G--C-G-T-G--C---C-T--AA-T--AC-A-T-G--C-A-A-G--T-C--GA-G-CG-C---------G-A----G-A--T-------------------------------TG-A-G-G-A-G------------------------CTT-G------------------------------C--T--C-C-T-T--A--------------------A-T----C--TT--G-------AG-C-G-G-C-GG-A--C--G-GG-T-G-A-G-T-A--AC-A-C-G-T-A-GG---CAA-C-CT-A-C-C-CTT--GA-G-A-T-T--G-G-G---AT-AA-C--TA--C-C-G-G-A-A-A-----…
>H97X84I02GC7LG
A---T-G-A--A-C-G-C--T-G-G-C-G-G--C-G-T-G--C---T-T--AA-C--AC-A-T-G--C-A-A-G--T-C--GA-G-CG-G---------G-C------------------------------------------------A-T-A------------------------GCA-A------------------------------T--A--T---------------------------------------GT--C-------AG-C-G-G-C-AG-A--C--G-GG-T-G-A-G-T-A--AC-G-C-G-T-G-GG---A-A-C-GT-A-C-C-TTT--TG-G-T-T-C--G-G-A---AC-AA-C--AC--A-G-G-G-A-A-A-----…
>H97X84I02HEZ4W
G-A-C-G-A--A-C-G-C--T-G-G-C-G-G--C-G-T-G--C---T-T--AA-C--AC-A-T-G--C-A-A-G--T-C--GA-A-CG-G---------A-G----T-AC-C----------CTCGA-A--------------AG---A-G-A-T------------------------TTC-G------------------------------GTCAA-T-G-G----A-G--AGGA------------C-T-----A-CT--T-------AG-T-G-G-C-GG-A--C--G-GG-T-G-A-G-T-A--AC-G-C-G-T-G-GG---TAA-C-CT-G-C-C-CTG--TA-C-T-G-G--G-G-G---AC-AA-C--AG--T-T-A-G-A-A-A-----…
>H97X84I02G19FY
A-G-C-G-A--A-C-G-C--T-G-G-C-G-G--C-A-G-G--C---T-T--AA-C--AC-A-T-G--C-A-A-G--T-C--GA-G-CG-----------G-AT---G-A--G----------------------------------A-G-G-A-G------------------------CTT-G------------------------------C--T--C-C-T-------------------------T-G----A--TT--T-------AG-C-G-G-C-GG-A--C--G-GG-T-G-A-G-T-A--AT-G-C-C-T-A-GG---A-A-T-CT-G-C-C-TGG--TA-G-T-G-G--G-G-G---AT-AA-C--GT--C-C-G-G-A-A-A-----…
>H97X84I02FYOF1
T---T-G-A--A-C-G-C--T-G-G-C-G-G--T-A-G-G--C---C-T--AA-C--AC-A-T-G--C-A-A-G--T-C--GA-A-CG-----------G-CAG--C-A--C----------------A--------------GT-A-A-G-A-G------------------------CTT-G------------------------------C--T--C-T-T-A--TG-----------------G-G-T----G--GC--G-------AG-T-G-G-C-GG-A--C--G-GG-T-G-A-G-G-A--AT-A-C-A-T-C-GG---A-A-T-CT-A-C-T-CTG--TC-G-T-G-G--G-G-G---AT-AA-C--GT--A-G-G-G-A-A-A-----…
>H97X84I02FSEGP
G-AGC-G-A--A-C-G-C--T-G-G-C-G-G--C-A-G-G--C---T-T--AA-C--AC-A-T-G--C-A-A-G--T-C--GA-ACGG-A---------G-T----A----C----------CCTCG-A--------------AA-G-A-G-A-T------------------------TTC-G------------------------------G--T--C-A-A-T--GG---AGAG------------G-A----C--TA--CTT-----AG-T-G-G-C-GG-A--C--G-GG-T-G-A-G-T-A--AC-G-C-G-T-G-AG---GAA-C-CT-G-C-C-TTT--CA-G-T-G-G--G-G-G---AC-AA-C--AG--T-T-G-G-A-A-A-----…
>H97X84I02FPIGK
A-A-C-G-A--A-C-G-C--T-G-G-C-G-G--C-A-T-G--C---C-T--AA-C--AC-A-T-G--C-A-A-G--T-C--GA-A-CG-A---------A-G----C----G---------TTTCGG-A--------------GG-A-A-G-T-T------------------------TTC-G------------------------------G--A--T-G-G-A---AT--CTGGA-----------A-T----GA-CT--G-------AG-T-G-G-C-GG-A--C--G-GG-T-G-A-G-T-A--AC-G-C-G-T-G-GG---TAA-C-CT-G-C-C-CTG--TA-C-T-G-G--G-G-G---AC-AA-C--AG--T-T-A-G-A-A-A-----…
>H97X84I02G0IL0
G-A-C-G-A--A-C-G-C--T-G-G-C-G-G--C-G-T-G--C---T-T--AA-C--AC-A-T-G--C-A-A-G--T-C--GA-A-CG-G---------A-G----T-A--C---------CCTCGA-A--------------AG-A---G-A-T------------------------TTC-G------------------------------GTCA--ATG-G-A--G-A--G-GA------------C-T-----A-CT--T-------AG-T-G-G-C-GG-A--C--G-GG-T-G-A-G-T-A--AC-G-C-G-T-G-GG---TAA-C-CT-G-C-C-CTG--TA-C-T-G-G--G-G-G---AC-AA-C--AG--T-T-A-G-A-A-A-----…
>H97X84I02FK216
A-A-C-G-A--A-C-G-C--T-G-G-C-G-G--C-A-T-G--C---C-T--AA-C--AC-A-T-G--C-A-A-G--T-C--GC-G-GG-----------G-CAG--C-G--G----------------G--------------GGAT-G-A----G-----------------------CTT-G----------------CT------------C--A--T-C---C--C------------------G-C-C----G--GC--G-------AC-C-G-G-C-GC-A--C--G-GG-T-G-A-G-T-A--AC-A-C-G-T-A-TG---CAA-C-CT-G-C-C-CCT--GT-C-A-G-G--G-G-G---AC-AA-C--CC--A-C-C-G-A-A-A-----…
>H97X84I02FHTYE
A-T-T-G-A--A-C-G-C--T-G-G-C-G-G--C-A-T-G--C---C-T--TA-C--AC-A-T-G--C-A-A-G--T-C--GA-A-CG-----------G-TAA--C-A--G--------------------------------------G-T-C------------------------CCC-G------------------------------G--A--T---------------------------G-C-T----G--AC--G-------AG-T-G-G-C-GA-A--C--G-GG-T-G-A-G-T-A--AT-A-C-A-T-C-GG---A-A-C-GT-G-C-C-CGA--TC-G-T-G-G--G-G-G---AT-AA-C--GA--G-G-C-G-A-A-A-----…
>H97X84I02FHKGQ
G-A-T-G-A--A-C-G-C--T-A-G-C-G-G--C-A-G-G--C---T-T--AA-C--AC-A-T-G--C-A-A-G--T-C--GC-G-GG-----------G-CAG--C-G--G----------------G--------------GG-A-T-G---AG-----------------------CTT-G----------------C----------------T--C-A-T-C--CC-----------------G-C-C----G--GC--G-------AC-C-G-G-C-GC-A--C--G-GG-T-G-A-G-T-A--AC-A-C-G-T-A-TA---CAA-C-CT-G-C-C-C-C--TGTC-A-G-G--G-G-G---AC-AA-C--CC--A-C-C-G-A-A-A-----…
>H97X84I02F9OTU
A-T-T-G-A--A-C-G-C--T-G-G-C-G-G--C-A-T-G--C---C-T--TA-C--AC-A-T-G--C-A-A-G--T-C--GA-A-CG-----------G-TAA--C-A--G----------------------------------------G--------------------------TT--A---------------------------------A------------------------------G-C-T----G--AC--G-------AG-T-G-G-C-GA-A--C--G-GG-T-G-A-G-T-A--AT-G-T-A-T-C-GG---A-A-C-GT-G-C-C-CAG--TC-G-T-G-G--G-G-G---AT-AA-C--TG--C-T-C-G-A-A-A-----…
>H97X84I02F9LE1
A-T-T-G-A--A-C-G-C--T-G-G-C-G-G--C-A-T-G--C---C-T--TA-C--AC-A-T-G--C-A-A-G--T-C--GA-A-CG-----------G-TAA--C-A--G--------------------------------------G-T-C------------------------TTC-G------------------------------G--A--T---------------------------G-C-T----G--AC--G-------AG-T-G-G-C-GA-A--C--G-GG-T-G-A-G-T-A--AT-A-C-A-T-C-GG---A-A-C-GC-G-C-C-CGA--TC-G-T-G-G--G-G-G---AT-AA-C--GA--G-G-C-G-A-A-A-----…
>H97X84I02IMVRB
G-A-C-G-A--A-C-G-C--T-G-G-C-G-G--C-G-T-G--C---T-T--AA-C--AC-A-T-G--C-A-A-G--T-C--GA-A-CG-G---------A-G----T-A--C---------CCTCGA-A--------------AG-A---G-A-T------------------------TTC-G------------------------------GTCA--ATG-G-A--G-A--G-GA------------C-T-----A-CT--T-------AG-T-G-G-C-GG-A--C--G-GG-T-G-A-G-T-A--AC-G-C-G-T-G-AG---GAA-C-CT-G-C-C-TTT--CA-G-T-G-G--G-G-G---AC-AA-C--AG--T-T-A-G-A-A-A-----…
>H97X84I02F2ZSU
A-T-T-G-A--A-C-G-C--T-G-G-C-G-G--C-A-T-G--C---C-T--TA-C--AC-A-T-G--C-A-A-G--T-C--GA-A-CG-----------G-TAA--C-A--G--------------------------------------G-T-C------------------------TTC-G------------------------------G--A--T---------------------------G-C-T----G--AC--G-------AG-T-G-G-C-GA-A--C--G-GG-T-G-A-G-T-A--AT-A-C-A-T-C-GG---A-A-C-GC-G-C-C-C-G-ATC-G-T-G-G--G-G-G---AT-AA-C--GA--G-G-C-G-A-A-A-----…
>H97X84I02IPA9T
A-T-T-G-A--A-C-G-C--T-G-G-C-G-G--C-A-T-G--C---C-T--TA-C--AC-A-T-G--C-A-A-G--T-C--GA-A-CG-----------G-TAA--C-A---------------------------------------G-G-T-C------------------------TTC-G------------------------------G-----A-T-------------------------G-C-T----G--AC--G-------AG-T-G-G-C-GA-A--C--G-GG-T-G-A-G-T-A--AT-A-C-A-T-C-GG---A-A-C-GT-A-C-C-TTT--CA-G-T-G-G--G-G-G---AT-AA-C--GT--A-G-C-G-A-A-A-----…
>H97X84I02H1LZ4
G-A-T-G-A--A-C-G-C--T-G-G-C-G-G--C-G-T-G--C---C-T--AA-C--AC-A-T-G--C-A-A-G--T-C--GA-A-CGAA---------G-C----G-T--T----------TC-GG-A--------------GG-A-A-G-T-T------------------------TTC-G------------------------------G--ATGG-A-ATCT-GGA--A--T------------G-A-------CT--G-------AG-T-G-G-C-GG-A--C--G-GG-T-G-A-G-T-A--AC-G-C-G-T-G-AG---GAA-C-CT-G-C-C-TTT--CA-G-T-G-G--G-G-G---AC-AA-C--AG--T-T-G-G-A-A-A-----…
>H97X84I02JZOG5
G-A-T-G-A--A-C-G-C--T-G-G-C-G-G--C-G-T-G--C---C-T--AA-T--AC-A-T-G--C-A-A-G--T-C--GA-G-CG-C---------G-A----G-A--T-------------------------------TG-A-G-G-A-G------------------------CTT-G------------------------------C--T--C-C-T-T--A--------------------A-T----C--TC--G-------AG-C-G-G-C-GG-A--C--G-GG-T-G-A-G-T-A--AC-A-C-G-T-A-GG---CAA-C-CT-A-C-C-CTT--GA-G-A-T-T--G-G-G---AT-AA-C--TA--C-C-G-G-A-A-A-----…
>H97X84I02JWESD
G-A-C-G-A--A-C-G-C--T-G-G-C-G-G--C-G-T-G--C---C-T--AA-T--AC-A-T-G--C-A-A-G--T-C--GA-G-CG-A---------A-C----A-G--A-------------------------------TG-A-G-A-A-G------------------------CTT-G------------------------------C--T--T-C-T-C--T--------------------G-A----T--GT--T-------AG-C-G-G-C-GG-A--C--G-GG-T-G-A-G-T-A--AC-A-C-G-T-G-GG---TAA-C-CT-A-C-C-TAT--AG-G-A-C-T--G-G-G---AT-GA-C--TC--CGG-G-G-A-A-A-----…
>H97X84I02JUS9A
G-A-T-G-A--A-C-G-C--T-A-G-C-G-G--C-A-G-G--C---T-T--AA-C--AC-A-T-G--C-A-A-G--T-C--GC-G-GG-----------G-CAG--C-G--G----------------G--------------GG-A-T-G---AG-----------------------CTT-G----------------C----------------T--C-A-T-C--CC-----------------G-C-C----G--GC--G-------AC-C-G-G-C-GC-A--C--G-GG-T-G-A-G-T-A--AC-A-C-G-T-A-TG---CAA-C-CT-G-C-C-C-C--TGTC-A-G-G--G-G-G---AC-AA-C--CC--A-C-C-G-A-A-A-----…
>H97X84I02GB2CD
A-T-T-G-A--A-C-G-C--T-G-G-C-G-G--C-A-T-G--C---C-T--TA-C--AC-A-T-G--C-A-A-G--T-C--GA-A-CG-----------G-TAA--C-A--G--------------------------------------G-T-C------------------------TTC-G------------------------------G--A--T---------------------------G-C-T----G--AC--G-------AG-T-G-G-C-GA-A--C--G-GG-T-G-A-G-T-A--AT-A-C-A-T-C-GG---A-A-C-GT-G-C-C-CGA--TC-G-T-G-G--G-G-G---AT-AA-C--GA--G-G-C-G-A-A-A-----…
>H97X84I02JU6JP
A---C-G-A--A-C-G-C--T-G-G-C-G-G--C-G-T-G--C---T-T--AA-C--AC-A-T-G--C-A-A-G--T-C--GA-A-CG-----------G-CAG--C-A--C----------------A--------------GT-A-A-G-A-G------------------------CTT-G------------------------------C--T--C-T-T-A--TG-----------------G-G-T----G--GC--G-------AG-T-G-G-C-GG-A--C--G-GG-T-G-A-G-G-A--AT-A-C-A-T-C-GG---A-A-T-CT-A-C-T-CTG--TC-G-T-G-G--G-G-G---AT-AA-C--GT--A-G-G-G-A-A-A-----…
>H97X84I02G63OZ
A-T-T-G-A--A-C-G-C--T-G-G-C-G-G--C-A-T-G--C---C-T--TA-C--AC-A-T-G--C-A-A-G--T-C--GA-A-CG-----------G-CAG--C-AC-G--------------------------------------G-A-C------------------------TTC-G------------------------------GT-C--T---------------------------G-G-T----G--GC--G-------AG-T-G-G-C-GA-A--C--G-GG-T-G-A-G-T-A--AT-G-T-A-T-C-GG---A-A-C-GT---A-C-CTT--TCAG-T-G-G--G-G-G---AT-AA-C--GA--A-G-C-G-A-A-A-----…
>H97X84I02JQ9TY
G-A-T-G-A--A-C-G-C--T-G-G-C-G-G--C-G-T-G--C---T-T--AA-C--AC-A-T-G--C-A-A-G--T-C--GA-A-CG-G---------G-C------T--CA-----------------------------TAT-C-GAA-A-C------------------------CTA-G------------------------------T--G--A-T-T-T--A--------------------T------GA-GT--T-------AG-T-G-G-C-GG-A--C--G-GG-T-G-A-G-T-A--AC-G-C-G-T-G-GA---AAA-C-CT-G-C-C-GTA--TA-C-T-G-G--G-G-G---AT-AA-C--AC--T-T-A-G-A-A-A-----…
>H97X84I02JOO0Y
A-A-C-G-A--A-C-G-C--T-G-G-C-G-G--C-G-T-G--C---C-T--AA-C--AC-A-T-G--C-A-A-G--T-C--GA-A-CG-A---------A-G----C----G---------TTTCGG-A--------------GG-A-A-G-T-T------------------------TTC-G------------------------------G--A--T-G-G-A---AT--CTGA------------A-T----GA-CT--G-------AG-T-G-G-C-GG-A--C--G-GG-T-G-A-G-T-A--AC-G-C-G-T-G-GG---TAA-C-CT-G-C-C-CTG--TA-C-T-G-G--G-G-G---AC-AA-C--AG--T-T-A-G-A-A-A-----…
>H97X84I02JMNA9
G-A-C-G-A--A-C-G-C--T-G-G-C-G-G--C-G-T-G--C---T-T--AA-C--AC-A-T-G--C-A-A-G--T-C--GA-A-CG-G---------A-T----T-G--C----------------G--------------CC-T---G----------------------------C-TTTT-----------------------------------G-T-G-G--GT-------------------G-T----G--GT--T-------AG-T-G-G-C-GA-A--C--G-GG-T-G-A-G-T-A--AC-A-C-G-T-G-AG---TAA-C-CT-G-C-C-CCC--TT-C-T-T-T--G-G-G---AT-AA-G--CT--C-C-T-G-A-A-A-----…
>H97X84I02JI9TD
A-T-T-G-A--A-C-G-C--T-G-G-C-G-A--C-A-T-G--C---C-T--TA-C--AC-A-T-G--C-A-A-G--C-C--GA-A-CG-----------G-TAA--C-A--G--------------------------------------G-T-C------------------------TTC-G------------------------------G--A--T---------------------------G-C-T----G--AC--G-------AG-T-G-G-C-GA-A--C--G-GG-T-G-A-G-T-A--AT-A-C-A-T-C-GG---A-A-C-GT-G-C-C-CGA--TC-G-T-G-G--G-G-G---AT-AA-C--GA--A-G-C-G-A-A-A-----…
>H97X84I02JCFYY
A-T-T-G-A--A-C-G-C--T-G-G-C-G-G--C-A-G-G--C---T-T--AA-C--AC-A-T-G--C-A-A-G--T-C--GA-A-CG-A---------A-G--------------------------------------------------G-C------------------------TTC-G------------------------------G--C------------------------------------------CT--T-------AG-T-G-G-C-GC-A--C--G-GG-T-G-C-G-T-A--AC-G-C-G-T-G-GG---A-A-T-CT-G-C-C-CTT--TG-G-T-T-C--G-G-A---AT-AA-C--AG--C-G-A-G-A-A-A-----…
>H97X84I02J8FRK
A-G-C-G-A--A-C-G-C--T-G-G-C-G-G--C-A-G-G--C---T-T--AA-C--AC-A-T-G--C-A-A-G--T-C--GA-A-CG-A---------G-A--------------------------------------------------C-C-------------------------T---------------------------------G--G------------------------------------------TC--T-------AG-T-G-G-C-GC-A--C----GG-T-G-C-G-T-A--AC-G-C-G-T-G-GG---A-A-T-CT-G-C-C-CTT--GG-G-T-T-C--G-G-A---AT-AA-C--TC--G-C-C-G-A-A-A-----…
>H97X84I02J31EV
A-T-T-G-A--A-C-G-C--T-G-G-C-G-G--C-A-T-G--C---C-T--TA-C--AC-A-T-G--C-A-A-G--T-C--GA-A-CG-----------G-TAA--C-A--G--------------------------------------G-T-C------------------------TTC-G------------------------------G--A--T---------------------------G-C-T----G--AC--G-------AG-T-G-G-C-GA-A--C--G-GG-T-G-A-G-T-A--AT-A-C-A-C-C-GG---A-A-C-GT-G-C-CCAGA---C-G-T-G-G--G-G-G---AT-AA-C--GA--G-G-C-G-A-A-A-----…
>H97X84I02IZQW0
A-T-T-G-A--A-C-G-C--T-G-G-C-G-G--C-A-T-G--C---C-T--TA-C--AC-A-T-G--C-A-A-G--T-C--GA-A-CG-----------G-TAA--C-A--G--------------------------------------G-T-C------------------------TTC-G------------------------------G--A--T---------------------------G-C-T----G--AC--G-------AG-T-G-G-C-GA-A--C--G-GG-T-G-A-G-T-A--AT-A-C-A-T-C-GG---A-A-C-GT-G-C-C-CGA--TC-G-T-G-G--G-G-G---AT-AA-C--GA--G-G-C-G-A-A-A-----…
>H97X84I02IX4OH
A-A-C-G-A--A-C-G-C--T-G-G-C-G-G--C-A-T-G--C---C-T--AA-T--AC-A-T-G--C-A-A-G--T-C--GA-G-CG-A---------A------C-AG-AC-------------------------------G-T-G-G-A-G------------------------CTT-G------------------------------C--T--C-C-TCTC----------------------T-C----T--GT--T-------AG-C-G-G-C-GA-A--T--G-GG-T-G-A-G-T-A--AC-A-C-G-T-G-GG---CAA-C-CT-G-C-C-CTG--TA-G-T-T-G--G-G-G---AT-AA-C--TC--C-G-G-G-A-A-A-----…
>H97X84I02IWKKL
A-A-C-G-A--A-C-G-C--T-G-G-C-G-G--C-A-T-G--C---C-T--AA-C--AC-A-T-G--C-A-A-G--T-C--GA-A-CG-----------G-TAA--C-A--G--------------------------------------G-T-C------------------------TTC-G------------------------------G--A--T---------------------------G-C-T----G--AC--G-------AG-T-G-G-C-GA-A--C--G-GG-T-G-A-G-T-A--AT-A-C-A-T-C-GG---A-A-C-GT-G-C-C-CGA--TC-G-T-G-G--G-G-G---AT-AA-C--GA--A-G-C-G-A-A-A-----…
>H97X84I02IUEHY
G-A-C-G-A--A-C-G-C--T-G-G-C-G-G--T-G-T-G--C---T-T--CA-C--AC-A-T-G--C-G-A-G--T-C--GA-A-CG-G---------G-G--------------------------------------------------T-A------------------------GCA-A------------------------------T--A------------------------------------------CC--C-------AG-T-G-G-C-GG-A--C--G-GG-T-G-A-G-T-A--AC-G-C-G-T-A-GA---A-A-T-CT-G-C-C-TTG--AG-A-T-G-G--G-G-G---AT-AA-C--AG--T-C-C-G-A-A-A-----…
>H97X84I02ITVMT
A---C-G-A--A-C-G-C--T-G-G-C-G-G--C-A-T-G--C---C-T--AA-T--AC-A-T-G--C-A-A-G--T-C--GA-A-CG-----------G-TAA--C-A--G--------------------------------------G-T-C------------------------TTC-G------------------------------G--A--T---------------------------G-C-T----G--AC--G-------AG-T-G-G-C-GA-A--C--G-GG-T-G-A-G-T-A--AT-A-C-A-T-C-GG---A-A-C-GT-G-C-C-CGA--TC-G-T-G-G--G-G-G---AT-AA-C--GA--A-G-C-G-A-A-A-----…
>H97X84I02IT6HN
A-A-C-G-A--A-C-G-C--T-G-G-C-G-G--T-G-T-G--C---T-T--CA-C--AC-A-T-G--C-A-A-G--C-C--GA-A-CG-G---------G-G--------------------------------------------------T-A------------------------GCA-A------------------------------T--A------------------------------------------CC--C-------AG-T-G-G-C-GG-A--C--G-GG-T-G-A-G-T-A--AC-G-C-G-T-A-GA---A-A-T-CT-G-C-C-TTG--AG-A-T-G-G--G-G-G---AT-AA-C--AG--T-C-C-G-A-A-A-----…
>H97X84I02IN7IR
G-A-C-G-A--A-C-G-C--T-G-G-C-G-G--C-G-T-G--C---T-T--AA-C--AC-A-T-G--C-A-A-G--T-C--GA-A-CG-----------G-AA---A-G--G--------------------------------C-C-C---T-G------------------------CTT-G------------------------------C--A----G-G-G-----------------------T-A----C--TC--G-------AG-T-G-G-C-GA-A--C--G-GG-T-G-A-G-T-A--AC-A-T-G-T-G-GG---TGA-T-CT-G-C-C-CTG--CA-C-T-T-C--G-G-G---AT-AA-G--CC--T-G-G-G-A-A-A-----…
>H97X84I02IN59D
G-ATT-G-A--A-C-G-C--T-G-G-C-G-G--C-G-T-G--C---C-T--AA-C--AC-A-T-G--C-A-A-G----C-------CG-A---------A------C--------------GG-GCT-C--------------AT-A-T-T-G-A------------------------AAC--------------------------------C--T--A---G----TG---ATTT-------------AT----GA-GT--T-------AG-T-G-G-C-GG-A--C--G-GG-T-G-A-G-T-A--AC-G-C-G-T-G-GA---AAA-C-CT-G-C-C-GTA--TA-C-T-G-G--G-G-G---AT-AA-C--AC--T-T-A-G-A-A-A-----…
>H97X84I02ILO3Q
A---C-G-A--A-C-G-C--T-G-G-C-G-G--C-A-T-G--C---C-T--TA-C--AC-A-T-G--C-A-A-G--T-C--GA-A-CG-----------G-TAA--C-A--G--------------------------------------G-T-C------------------------TTC-G------------------------------G--A--T---------------------------G-C-T----G--AC--G-------AG-T-G-G-C-GA-A--C--G-GG-T-G-A-G-T-A--AT-A-C-A-T-C-GG---A-A-C-GT-G-C-C-CGG--TC-G-T-G-G--G-G-G---AT-AA-C--GA--G-G-C-G-A-A-A-----…
>H97X84I02IK0CU
A-T-T-G-A--A-C-G-C--T-G-G-C-G-G--C-A-T-G--C---C-T--TA-C--AC-A-T-G--C-A-A-G--T-C--GA-A-CG-----------G-TAA--C-A--G--------------------------------------A-T-C------------------------TTC-G------------------------------G--A--T---------------------------G-C-T----G--AC--G-------AG-T-G-G-C-GA-A--C--G-GG-T-G-A-G-T-A--AT-A-C-A-T-C-GG---A-A-C-GT-G-C-C-CAA--TC-G-T-G-G--G-G-G---AT-AA-C--GA--G-G-C-G-A-A-A-----…
>H97X84I02IIMES
A-T-T-G-A--A-C-G-C--T-G-G-C-G-G--C-A-T-G--C---C-T--TA-C--AC-A-T-G--C-A-A-G--T-C--GA-A-CG-----------G-TAA--C-A--G--------------------------------------G-T-C------------------------TTC-G------------------------------G--A--T---------------------------G-C-T----G--AC--G-------AG-T-G-G-C-GA-A--C--G-GG-T-G-A-G-T-A--AT-A-C-A-T-C-GG---A-A-C-GT-G-C-C-CGA--TC-G-T-G-G--G-G-G---AT-AA-C--GA--G-G-C-G-A-A-A-----…
>H97X84I02ID115
A-T-T-G-A--A-C-G-C--T-G-G-C-G-G--C-A-G-G--C---T-T--AA-C--AC-A-T-G--C-A-A-G--T-C--GA-A-CG-A---------G-A--------------------------------------------------C-C------------------------TTC-G------------------------------G--G------------------------------------------TC--T-------AG-T-G-G-C-GC-A--C--G-GG-T-G-C-G-T-A--AC-G-C-G-T-G-GG---A-A-T-CT-G-C-C-CTT--GG-G-T-T-C--G-G-A---AT-GA-C--TC--G-C-C-G-A-A-A-----…
>H97X84I02IAPIN
A---C-G-A--A-C-G-C--T-G-G-C-G-G--C-A-T-G--C---C-T--TA-C--AC-A-T-G--C-A-G-G--T-C--GA-A-CG-----------G-CAG--C-A--C------------------------------------G-G-A-C------------------------TTC-G------------------------------G--T--C-T-------------------------G-G-T----G--GC--G-------AG-T-G-G-C-GA-A--C--G-GG-T-G-A-G-T-A--AT-G-T-A-T-C-GG---A-A-C-GT-A-C-C-TTT--CA-G-T-G-G--G-G-G---AT-AA-C--GT--A-G-C-G-A-A-A-----…
>H97X84I02I8ENH
G-A-T-G-A--A-C-G-C--T-A-G-C-G-G--C-A-G-G--C---T-T--AA-C--AC-A-T-G--C-A-A-G--T-C--GC-G-GG-----------G-CAG--C-G--G----------------G--------------GG-A-T-G---AG-----------------------CTT-G----------------C----------------T--C-A-T-C--CC-----------------G-C-C----G--GC--G-------AC-C-G-G-C-GC-A--C--G-GG-T-G-A-G-T-A--AC-A-C-G-T-A-TG---CAA-C-CT-G-C-C-C-C--TG-T-C-A-G--G-G-G---AC-AA----CC--A-C-C-G-A-A-A-----…
>H97X84I02I5E12
A-G-C-G-A--A-C-G-C--T-G-G-C-G-G--C-A-G-G--C---T-T--AA-C--AC-A-T-G--C-A-A-G--T-C--GA-G-CG-G---------A-G----A-T--G----------------------------------A-G-G-T-G------------------------CTT-G------------------------------C--A--C-C-T-------------------------T-A----T--CT--T-------AG-C-G-G-C-GG-A--C--G-GG-T-G-A-G-T-A--AT-G-C-T-T-A-GG---A-A-T-CT-G-C-C-TAT--TA-G-T-G-G--G-G-G---AC-AA-C--AT--T-C-C-G-A-A-A-----…
>H97X84I02I5D8E
A-T-T-G-A--A-C-G-C--T-G-G-C-G-G--C-A-T-G--C---C-T--TA-C--AC-A-T-G--C-A-A-G--T-C--GA-A-CG-----------G-TAA--C-A--G--------------------------------------G-T-C------------------------TTC-G------------------------------G--A--T---------------------------G-C-T----G--AC--G-------AG-T-G-G-C-GA-A--C--G-GG-T-G-A-G-T-A--AT-G-T-A-T-C-GG---A-A-C-GT-G-C-CCAGA---C-G-T-G-G--G-G-G---AC-AA-C--GA--G-G-C-G-A-A-A-----…
>H97X84I02I4OCM
A-T-T-G-A--A-C-G-C--T-G-G-C-G-G--C-A-T-G--C---C-T--TA-C--AC-A-T-G--C-A-A-G--T-C--GA-A-CG-----------G-TAA--C-A--G--------------------------------------G-T-C------------------------TTC-G------------------------------G--A--T---------------------------G-C-T----G--AC--G-------AG-T-G-G-C-GA-A--C--G-GG-T-G-A-G-T-A--AT-A-C-A-T-C-GG---A-A-C-GT-G-C-C-CGA--TC-G-T-G-G--G-G-G---AT-AA-C--GA--A-G-C-G-A-A-G-----…
>H97X84I02I3O4C
A---T-G-A--A-C-G-C--T-A-G-C-G-G--G-A-G-G--C---C-T--TA-C--AC-A-T-G--C-A-G-G--T-C--GA-A-CG-----------G-TAA--C-A--G--------------------------------------G-T-C------------------------CTC-G------------------------------G--A--T---------------------------G-C-T----G--AC--G-------AG-T-G-G-C-GA-A--C--G-GG-T-G-A-G-T-A--AT-A-C-A-T-C-GG---A-A-C-GT-G-C-C-CGA--TC-G-T-G-G--G-G-G---AT-AA-C--GA--G-G-C-G-A-A-A-----…
>H97X84I02I78M3
G-A-C-G-A--A-C-G-C--T-G-G-C-G-G--C-G-T-G--C---C-T--AA-T--AC-A-T-G--C-A-A-G--T-C--GA-G-CG-A---------A-C----C-A--A-------------------------------TA-A-G-A-A-G------------------------CTT-G------------------------------C--T--T---T-T--T--------------------G-T----TG-GT--T-------AG-C-G-G-C-GG-A--C--G-GG-T-G-A-G-T-A--AC-A-C-G-T-G-GG---TAA-C-CT-A-C-C-TAT--AA-G-A-C-T--G-G-G---AT-AA-C--TC--C-G-G-G-A-A-A-----…
>H97X84I02I1IZG
G-A-C-G-A--A-C-G-C--T-G-G-C-G-G--C-G-T-G--C---C-T--AA-T--AC-A-T-G--C-A-A-G--T-A--GA-A-CG-C---------T-G----A-AG-G----------------------------------A-G-G-A-G------------------------CTT-G------------------------------C--C--T-C-T-C-----------------------T-G----G--AT--G-------AG-T-T-G-C-GA-A--C--G-GG-T-G-A-G-T-A--AC-G-C-G-TGG--G---TAA-C-CT-G-C-C-TGG--TA-G-C-G-G--G-G-G---AT-AA-C--TA--T-T-G-G-A-A-A-----…
>H97X84I02I0OT5
A-T-T-G-A--A-C-G-C--T-G-G-C-G-G--C-A-T-G--C---C-T--TA-C--AC-A-T-G--C-A-A-G--T-C--GA-A-CG-----------G-TAA--C-A--G----------------------------------------G------------------------TCCTCGGA--------------------------------T------------------------------G-C-T----G--AC--G-------AG-T-G-G-C-GA-A--C--G-GG-T-G-A-G-T-A--AT-G-T-A-T-C-GG---A-A-C-GT-G-C-C-CAG--TC-G-T-G-A--G-G-G---AT-AA-C--TG--C-T-C-G-A-A-A-----…
>H97X84I02I0HZG
G-A-C-G-A--A-C-G-C--T-G-G-C-G-G--C-G-T-G--C---C-T--AA-T--AC-A-T-G--C-A-A-G--T-C--GA-A-CG-A---------A-CC---G-C--A-------------------------------AC-T-T-G-A-A------------------------CTT-G---------------------------------T--T-C-T-CG-T------------------T-A-A----G--GT--T-------AG-T-G-G-C-GC-A--C--G-GG-T-G-A-G-T-A--AC-A-C-G-T-G-GG---GAA-C-CT-G-C-C-CTT--TA-G-T-G-G--G-G-G---AT-AA-C--AG--T-C-G-G-A-A-A-----…
>H97X84I02HV8DT
A-T-T-G-A--A-C-G-C--T-G-G-C-G-G--C-A-T-G--C---C-T--TA-C--AC-A-T-G--C-A-A-G--T-C--GA-A-CG-----------G-TAA--C-A--G--------------------------------------G-T-C------------------------TTC-G------------------------------G--A--T---------------------------G-C-T----G--AC--G-------AG-T-G-G-C-GA-A--C--G-GG-T-G-A-G-T-A--AT-A-C-A-T-C-GG---A-A-C-GT-G-C-C-CGA--TC-G-T-G-G--G-G-G---AT-AA-C--GA--A-G-C-G-A-A-A-----…
>H97X84I02HTMAR
G-A-T-G-A--A-C-G-C--T-G-G-C-G-G--C-G-T-G--C---C-T--AA-C--AC-A-T-G--C-A-A-G--T-C--GA-A-CG-G-----------G----C-T-------------C-A---T---------------A-T-T-G-A--A---------------------------A------------C-CT--------------A--G--T-G-A-T---TT--AT-G--------------A-------GT--T-------AG-T-G-G-C-GG-A--C--G-GG-T-G-A-G-T-A--AC-G-C-G-T-G-GA---AAA-C-CT-G-C-C-GTA--TA-C-T-G-G--G-G-G---AT-AA-C--AC--T-T-A-G-A-A-A-----…
>H97X84I02HSB1C
A---C-G-A--A-C-G-C--T-G-G-C-G-G--C-A-T-G--C---C-T--TA-C--AC-A-T-G--C-A-A-G--T-C--GA-A-CG-----------G-TAA--C-A--G--------------------------------------G-T-C------------------------TTC-G------------------------------G--A--T---------------------------G-C-T----G--AC--G-------AG-T-G-G-C-GA-A--C--G-GG-T-G-A-G-T-A--AT-A-C-A-T-C-GG---A-A-C-GT-G-C-C-CGA--TC-G-T-G-G--G-G-G---AT-AA-C--GA--A-G-C-G-A-A-A-----…
>H97X84I02HQ0YW
G-A-C-G-A--A-C-G-C--T-G-G-C-G-G--C-G-T-G--C---T-T--AA-C--AC-A-T-G--C-A-A-G--T-C--GA-G-CG-A---------A-C----A-G--A-------------------------------TG-A-G-A-A-G------------------------CTT-G------------------------------C--T--T-C-T-C--T--------------------G-A----T--GT--T-------AG-C-G-G-C-GG-A--C--G-GG-T-G-A-G-T-A--AC-A-C-G-T-G-GG---TAA-C-CT-A-C-C-TAT--AA-G-A-C-T--G-G-G---AT-AA-C--TC--C-G-G-G-A-A-A-----…
>H97X84I02HPX2Q
G-A-T-G-A--A-C-G-C--T-G-G-C-G-G--C-G-T-G--C---C-T--AA-T--AC-A-T-G--C-A-A-G--T-C--GA-A-CG-G---------A-G----T-A------------CCCTCG-A--------------AA-G-A-G-A-T------------------------TTC-G------------------------------G--T--C-A-A-T--GGA--GAGGA-----------C-T----A--CT--T-------AG-T-G-G-C-GG-A--C--G-GG-T-G-A-G-T-A--AC-G-C-G-T-G-AG---GAA-C-CT-G-C-C-TTT--CA-G-T-G-G--G-G-G---AC-AA-C--AG--T-T-G-G-A-A-A-----…
>H97X84I02HNGOM
G-A-T-G-A--A-C-G-C--T-G-G-C-G-G--C-G-T-G--C---C-T--AA-C--AC-A-T-G--C-A-A-G--T-C--GA-A-CG-A---------A-G----C-G--T----------TTCGG-A--------------GG-A-A-G-T-T------------------------TTC-G------------------------------G--A--T-G-G-A--ATC--TGGA------------A-T----GA-CT--G-------AG-T-G-G-C-GG-A--C--G-GG-T-G-A-G-T-A--AC-G-C-G-T-G-GG---TAA-C-CT-G-C-C-CTG--TA-C-T-G-G--G-G-G---AC-AA-C--AG--T-T-A-G-A-A-A-----…
>H97X84I02HLQNQ
G-A-C-G-A--A-C-G-C--T-A-G-C-G-G--C-A-G-G--C---T-T--AA-C--AC-A-T-G--C-A-A-G--T-C--GC-G-GG-----------G-CAG--C-G--G----------------G--------------GGAT-G-A----G-----------------------CTT-G----------------CT------------C--A--T-C---C--C------------------G-C-C----G--GC--G-------AC-C-G-G-C-GC-A--C--G-AG-T-G-A-G-T-A--AC-A-C-G-T-A-TG---CAA-C-CT-G-C-C-CCT--GT-C-A-G-G--G-G-G---AC-AA-C--CC--A-C-C-G-A-A-A-----…
>H97X84I02HKED5
A-A-C-G-A--A-C-G-C--T-G-G-C-G-G--C-A-T-G--C---C-T--AA-C--AC-A-T-G--C-A-A-G--T-C--GA-A-CG-A---------A-CC---G-C--A-------------------------------AC-T-T-G-A-A------------------------CTT-G---------------------------------T--T-C-T-CG-T------------------T-A-A----G--GT--T-------AG-T-G-G-C-GC-A--C--G-GG-T-G-A-G-T-A--AC-A-C-G-T-G-GG---GAA-C-CT-G-C-C-CTT--TA-G-T-G-G--G-G-G---AT-AA-C--AG--T-C-G-G-A-A-A-----…
>H97X84I02HKC2M
G-A-T-G-A--A-C-G-C--T-G-G-C-G-G--C-A-T-G--C---C-T--AA-T--AC-A-T-G--C-A-A-G--T-C--GA-G-CG-A---------A------C-AG-AC-------------------------------G-A-G-G-A-G------------------------CTT-G------------------------------C--T--C-C-TCTC----------------------T-C----T--GT--T-------AG-C-G-G-C-GA-A--T--G-GG-T-G-A-G-T-A--AC-A-C-G-T-G-GG---CAA-C-CT-G-C-C-CTG--TA-G-T-T-G--G-G-G---AT-AA-C--TC--C-G-G-G-A-A-A-----…
>H97X84I02HJ5L5
A-A-C-G-A--A-C-G-C--T-G-G-C-G-G--C-A-T-G--C---C-T--AA-C--AC-A-T-G--C-A-A-G--T-C--GA-A-CG-A---------G-A--------------------------------------------------C-C------------------------TTC-G------------------------------G--G------------------------------------------TC--T-------AG-T-G-G-C-GC-A--C--G-GG-T-G-C-G-T-A--AC-G-C-G-T-G-GG---A-A-T-CT-G-C-C-CTT--GG-G-T-T-C--G-G-A---AT-AA-C--TT--C-T-G-G-A-A-A-----…
>H97X84I02HIYGM
G-A-T-G-A--A-C-G-C--T-A-G-C-G-G--C-A-G-G--C---T-T--AA-C--AC-A-T-G--C-A-A-G--T-C--GC-G-GG-----------G-CAG--C-G--G----------------G--------------GGAT-G-A----G-----------------------CTT-G----------------CT------------C--A--T-C---C--C------------------G-C-C----G--GC--G-------AC-C-G-G-C-GC-A--C--G-GG-T-G-A-G-T-A--AC-A-C-G-T-A-TG---CAA-C-CT-G-C-C-CCT--GT-C-A-G-G--G-G-G---AC-AA-C--CC--A-C-C-G-A-A-A-----…
>H97X84I02HG722
A-C-T-G-A--A-C-G-C--T-G-G-C-G-G--C-A-G-G--C---T-T--AA-C--AC-A-T-G--C-A-A-G--T-C--GA-G-CG-G---------A-G----A-T--G----------------------------------A-G-G-T-G------------------------CTT-G------------------------------C--A--C-C-T-------------------------T-A----T--CT--T-------AG-C-G-G-C-GG-A--C--G-GG-T-G-A-G-T-A--AT-G-C-T-T-A-GG---A-A-T-CT-G-C-C-TAT--TA-G-T-G-G--G-G-G---AC-AA-C--AT--C-C-C-G-A-A-A-----…
>H97X84I02HFEQO
A-G-C-G-A--A-C-G-C--T-G-G-C-G-G--C-A-G-G--C---T-T--AA-C--AC-A-T-G--C-A-A-G--T-C--GA-G-CG-G---------G-C------------------------------------------------G-T-A------------------------GCA-A------------------------------T--A--C---------------------------------------GT--C-------AG-C-G-G-C-AG-A--C--G-GG-T-G-A-G-T-A--AC-A-C-G-T-G-GG---A-A-C-GT-A-C-C-TTT--TG-G-T-T-C--G-G-A---AC-AA-C--AC--A-G-G-G-A-A-A-----…
>H97X84I02HE1ZX
G-ATT-G-A--A-C-G-C--T-G-G-C-G-G--C-A-T-G--C---C-T--TA-C--AC-A-T-G--C-A-A-G--T-C--GA-A-CG-G---------A-T----T-G--C----------------G--------------CC-T---G----------------------------C-TTTT-----------------------------------G-T-G-G--GT-------------------G-T----G--GT--T-------AG-T-G-G-C-GA-A--C--G-GG-T-G-A-G-T-A--AC-A-C-G-T-G-AG---TAA-C-CT-G-C-C-CCC--TT-C-T-T-T--G-G-G---AT-AA-G--CT--C-C-T-G-A-A-A-----…
>H97X84I02HCU4Y
A-T-T-G-A--A-C-G-C--T-G-G-C-G-G--C-A-C-G--C---C-T--TA-C--AC-A-T-G--C-A-G-G--T-T--GA-A-CG-----------G-TAA--C-A--G--------------------------------------G-T-C------------------------CTC-G------------------------------G--A--T---------------------------G-C-T----G--AC--G-------AG-T-G-G-C-GA-A--C--G-GG-T-G-A-G-T-A--AT-A-C-A-T-C-GG---A-A-C-GT-G-C-C-CGA--TC-G-T-G-G--G-G-G---AT-AA-C--GA--G-G-C-G-A-A-A-----…
>H97X84I02H9L86
G-A-T-G-A--A-C-G-C--T-A-G-C-G-G--C-A-G-G--C---T-T--AA-C--AC-A-T-G--C-A-A-G--T-C--GC-G-GG-----------G-CAG--C-G--G----------------G--------------GG---G-A-TGAG-----------------------CTT-G----------------CT------------C--A--T-C---C--C------------------G-C-C----G--GC--G-------AC-C-G-G-C-GC-A--C--G-GG-T-G-A-G-T-A--AC-A-C-G-T-A-TG---CAG-C-CT-G-C-C-CCT--GT-C-A-G-G--G-G-G---AC-AA-C--CC--A-C-C-G-A-A-A-----…
>H97X84I02JTTLY
G-A-T-G-A--A-C-G-C--T-G-G-C-G-G--C-G-T-G--C---T-T--AA-C--AC-A-T-G--C-A-A-G--T-C--GA-A-CG-----------G-G----C-T--C----------AT--A-T--------------TG-A-A-A-C----------------------------C-----------------------------------T--A---G-T--G-A---T-TT-----------A-T----GA-GT--T-------AG-T-G-G-C-GG-A--C--G-GG-T-G-A-G-T-A--AC-G-C-G-T-G-GG---TAA-C-CT-G-C-C-CTG--TA-C-T-G-G--G-G-G---AC-AA-C--AG--T-T-A-G-A-A-A-----…
>H97X84I02H3QCN
G-A-T-G-A--A-C-G-C--T-G-G-C-G-G--C-G-T-G--C---T-T--AA-C--AC-A-T-G--C-A-A-G--T-C--GA-A-CG-------------G---------------------GC-T-C--------------AT-A-T-T-G-A------------------------AAC-C------------------------------T--A--G-T-G----A----T--TT-----------A-T----GA-GT--T-------AG-T-G-G-C-GG-A--C--G-GG-T-G-A-G-T-A--AC-G-C-G-T-G-GA---AAA-C-CT-G-C-C-GTA--TA-C-T-G-G--G-G-G---AT-AA-C--AC--T-T-A-G-A-A-A-----…
>H97X84I02H2A78
G-A-T-G-A--A-C-G-C--T-G-G-T-G-G--C-G-T-G--C---C-T--AA-T--AC-A-T-G--C-A-A-G--T-C--GA-G-CG-A---------A-C----A-G--A--------------------------------CGA-G-G-A-G------------------------CTT-G------------------------------C--T--C-CTC-T-----------------------C-T----CT-GT--T-------AG-C-G-G-C-GA-A--T--G-GG-T-G-A-G-T-A--AC-A-C-G-T-G-GG---CAA-C-CT-G-C-C-CTG--TA-G-T-T-G--G-G-G---AT-AA-C--TC--C-G-G-G-A-A-A-----…
>H97X84I02GZB07
G-ATT-G-A--A-C-G-C--T-G-G-C-G-G--C-G-T-G--C---T-T--AA-C--AC-A-T-G--C-A-A-G--T-C--GA-A-CG-----------G-AA---A-G--G--------------------------------C-C-C---T-G------------------------CTT-G------------------------------C--A----G-G-G-----------------------T-A----C--TC--G-------AG-T-G-G-C-GA-A--C--G-GG-T-G-A-G-T-A--AC-A-C-G-T-G-GG---TGA-T-CT-G-C-C-CTA--CA-C-T-T-C--G-G-G---AT-AA-G--CC--T-G-G-G-A-A-A-----…
>H97X84I02GYY0K
G-A-C-G-A--A-C-G-C--T-G-G-C-G-G--C-A-T-G--C---C-T--AA-T--AC-A-T-G--C-A-A-G--T-C--GA-G-CG-G-----------G----C-T-------------C-A---T---------------A-T-T-G-A--A---------------------------A------------C-CT--------------A--G--T-G-A-T---TT--AT-G--------------A-------GT--T-------AG-T-G-G-C-GG-A--C--G-GG-T-G-A-G-T-A--AC-G-C-G-T-G-GA---AAA-C-CT-G-C-C-GTA--TA-C-T-G-G--G-G-G---AT-AA-C--AC--T-T-A-G-A-A-A-----…
>H97X84I02GXVDO
A-T-T-G-A--A-C-G-C--T-G-G-C-G-G--C-A-T-G--C---C-T--TA-C--AC-A-T-G--C-A-A-G--T-C--GA-A-CG-----------G-TAA--C-A--G--------------------------------------G-T-C------------------------TTC-G------------------------------G--A--T---------------------------G-C-C----G--AC--G-------AG-T-G-G-C-GA-A--C--G-GG-T-G-A-G-T-A--AT-A-C-A-T-C-GG---A-A-C-GT-G-C-C-CAG--AC-G-T-G-G--G-G-G---AT-AA-C--GA--G-G-C-G-A-A-A-----…
>H97X84I02GW1FC
G-A-T-G-A--A-C-G-C--T-A-G-C-G-A--C-A-G-G--C---T-T--AA-C--AC-A-T-G--C-A-A-G--T-C--GC-G-GG-----------G-CAG--C-G--G----------------G--------------GGAT-G-A----G-----------------------CTT-G----------------CT------------C--A--T-C---C--C------------------G-C-C----G--GC--G-------AC-C-G-G-C-GC-A--C--G-GG-T-G-A-G-T-A--AC-A-C-G-T-A-TG---CAA-C-CT-G-C-C-CCT--GT-C-A-G-G--G-G-G---AC-AA-C--CC--A-C-C-G-A-A-A-----…
>H97X84I02GVOAI
A---C-G-A--A-C-G-C--T-G-G-C-G-G--C-A-T-G--C---C-T--TA-C--AC-A-T-G--C-A-A-G--T-C--GA-A-CG-----------G-TAA--C-A--G--------------------------------------G-T-C------------------------TTC-G------------------------------G--A--T---------------------------G-C-T----G--AC--G-------AG-T-G-G-C-GA-A--C--G-GG-T-G-A-G-T-A--AT-A-C-A-T-C-GG---A-A-C-GT-G-C-C-CGA--TC-G-T-G-G--G-G-G---AT-AA-C--GA--A-G-C-G-A-A-A-----…
>H97X84I02GVM54
A-T-T-G-A--A-C-G-C--T-G-G-C-G-G--C-A-G-G--C---T-T--AA-C--AC-G-T-G--C-A-A-G--T-C--GA-G-CG-G---------A-G----A-T--G----------------------------------A-G-G-T-G------------------------CTT-G------------------------------C--A--C-C-T-------------------------T-A----T--CT--T-------AG-C-G-G-C-GG-A--C--G-GG-T-G-A-G-T-A--AT-G-C-T-T-A-GG---A-A-T-CT-G-C-C-TAT--TA-G-T-G-G--G-G-G---AC-AA-C--AT--T-C-C-G-A-A-A-----…
>H97X84I02GTVOZ
A-T-T-G-A--A-C-G-C--T-G-G-C-G-G--C-A-T-G--C---C-T--TA-C--AC-A-T-G--C-A-A-G--T-C--GA-A-CG-----------G-TAA--C-A--G--------------------------------------G-T-C------------------------TTC-G------------------------------G--A--T---------------------------G-C-T----G--AC--G-------AG-T-G-G-C-GA-A--C--G-GG-T-G-A-G-T-A--AT-A-C-A-T-C-GG---A-A-C-GT-G-C-CCAGA---C-G-T-G-G--G-G-G---AT-AA-C--GA--G-G-C-G-A-A-A-----…
>H97X84I02GTL5C
G-A-C-G-A--A-C-G-C--T-G-G-C-G-G--C-G-T-G--C---T-T--AA-C--AC-A-T-G--C-A-A-G--T-C--GA-A-CG-----------G-AT---T-G--C--------------------------------G-C-C-T-G-C------------------------TTT-T------------------------------G--T--G-G-GTG-----------------------T-G----G--T---T-------AG-T-G-G-C-GA-A--C--G-GG-T-G-A-G-T-A--AC-A-C-G-T-G-AG---TAA-C-CT-G-C-C-CCC--TT-C-T-T-T--G-G-G---AT-AA-G--CT--C-C-T-G-A-A-A-----…
>H97X84I02GSX47
A-T-T-G-A--A-C-G-C--T-G-G-C-G-G--C-A-T-G--C---C-T--TA-C--AC-A-T-G--C-A-A-G--T-C--GA-A-CG-----------G-TAA--C-A--G--------------------------------------G-T-C------------------------TTC-G------------------------------G--A--T---------------------------G-C-T----G--AC--G-------AG-T-G-G-C-GA-A--C--G-GG-T-G-A-G-T-A--AT-A-C-A-T-C-GG---A-A-C-GT-G-C-C-CGA--TC-G-T-G-G--G-G-G---AT-AA-C--GA--A-G-C-G-A-A-A-----…
>H97X84I02GSAN1
A-A-C-G-A--A-C-G-C--T-G-G-C-G-G--C-A-T-G--C---C-T--AA-C--AC-A-T-G--C-A-A-G--T-C--GA-A-CG-G---------A-T----T-G--C----------------G--------------CC-T---G----------------------------C-TTTT-----------------------------------G-T-G-G--GT-------------------G-T----G--GT--T-------AG-T-G-G-C-GA-A--C--G-GG-T-G-A-G-T-A--AC-A-C-G-T-G-AG---TAA-C-CT-G-C-C-CCC--TT-C-T-T-T--G-G-G---AT-AA-G--CT--C-C-T-G-A-A-A-----…
>H97X84I02GQ48J
G-A-T-G-A--A-C-G-C--T-G-G-C-G-G--C-G-T-G--C---C-T--AA-T--AC-A-T-G--C-A-A-G--T-C--GA-G-CG-C---------G-A----G-A--T-------------------------------TG-A-G-G-A-G------------------------CTT-G------------------------------C--T--C-C-T-T--A--------------------A-T----C--TC--G-------AG-C-G-G-C-GG-A--C--G-GG-T-G-A-G-T-A--AC-A-C-G-T-A-GG---CAA-C-CT-A-C-C-CTT--GA-G-A-C-T--G-G-G---AT-AA-C--TA--C-C-G-G-A-A-A-----…
>H97X84I02GPVMB
G-A-T-G-A--A-C-G-C--T-A-G-C-G-G--C-A-G-G--C---T-T--AA-C--AC-A-T-G--C-A-A-G--T-C--GC-G-GG-----------G-CAG--C-G--G----------------G--------------GG-A-T-G---AG-----------------------CTT-G----------------C----------------T--C-A-T-C--CC-----------------G-C-C----G--GC--G-------AC-C-G-G-C-GC-A--C--G-GG-C-G-A-G-T-A--AC-A-C-G-T-A-TG---CAA-C-CT-G-C-C-C-C--TGTC-A-G-G--G-G-G---AC-AA-C--CC--A-C-C-G-A-A-A-----…
>H97X84I02GPGR3
G-A-C-G-A--A-C-G-C--T-G-G-C-G-G--C-G-T-G--C---T-T--AA-C--AC-A-T-G--C-A-A-G--T-C--GA-A-C--G-----------G----A-T--T--------------G-C--------------GC-C-T-G---C------------------------TTT-T------------------------------G-------T-G-G--GTG------------------T-G----G---T--T-------AG-T-G-G-C-GA-A--C--G-GG-T-G-A-G-T-A--AC-A-C-G-T-G-AG---TAA-C-CT-G-C-C-CCC--TT-C-T-T-T--G-G-G---AT-AA-G--CT--C-C-T-G-A-A-A-----…
>H97X84I02GNY9K
A-G-T-G-A--A-C-G-C--T-G-G-C-G-G--T-A-G-G--C---C-T--AA-C--AC-A-T-G--C-A-A-G--T-C--GA-A-CG-----------G-CAG--C-A--C----------------A--------------GT-A-A-G-A-G------------------------CTT-G------------------------------C--T--C-T-T-A--TG-----------------G-G-T----G--GC--G-------AG-T-G-G-C-GG-A--C--G-GG-T-G-A-G-G-A--AT-A-C-A-T-C-GG---A-A-T-CT-A-C-T-CTG--TC-G-T-G-G--G-G-G---AT-AA-C--GT--A-G-G-G-A-A-A-----…
>H97X84I02GN1TA
A-T-T-G-A--A-C-G-C--T-G-G-C-G-G--C-A-T-G--C---C-T--TA-C--AC-A-T-G--C-A-A-G--T-C--GA-A-CG-A---------A-G--------------------------------------------------G-C------------------------TTC-G------------------------------G--C------------------------------------------CT--T-------AG-T-G-G-C-GC-A--C--G-GG-T-G-C-G-T-A--AC-G-C-G-T-G-GG---A-A-T-CT-G-C-C-CTT--TG-G-T-T-C--G-G-A---AT-AA-C--AG--C-G-A-G-A-A-A-----…
>H97X84I02GKSRE
G-A-C-G-A--A-C-G-C--T-G-G-C-G-G--C-G-T-G--C---C-C--AA-T--AC-A-T-G--C-A-A-G--T-A--GA-A-CG-C---------T-G----A-AG-G----------------------------------A-G-A-A-G------------------------CTT-G------------------------------C--T--T-C-T-C-----------------------T-G----G--AT--G-------AG-T-T-G-C-GA-A--C--G-GG-T-G-A-G-T-A--AC-G-C-G-T-AG-G---TAA-C-CT-G-C-C-TGG--TA-G-C-G-G--G-G-G---AT-AA-C--TA--T-T-G-G-A-A-A-----…
>H97X84I02GKPHG
A-T-T-G-A--A-C-G-C--T-G-G-C-G-G--C-A-T-G--C---C-T--TA-C--GC-A-T-G--C-A-A-G--T-C--GA-A-CG-----------G-TAA--C-A--G--------------------------------------G-T-C------------------------TTC-G------------------------------G--A--T---------------------------G-C-T----G--AC--G-------AG-T-G-G-C-GA-A--C--G-GG-T-G-A-G-T-A--AT-A-C-A-T-C-GG---A-A-C-GT-G-C-C-C-G-ATC-G-T-G-G--G-G-G---AT-AA-C--GA--G-G-C-G-A-A-A-----…
>H97X84I02GENL4
A-T-G-G-A--A-C-G-C--T-G-G-C-G-G--C-A-T-G--C---C-T--TA-C--AC-A-T-G--C-A-G-G--T-C--GA-A-CG-----------G-TAA--C-A--G--------------------------------------G-T-C------------------------CTC-G------------------------------G--A--T---------------------------G-C-T----G--AC--G-------AG-T-G-G-C-GA-A--C--G-GG-T-G-A-G-T-A--AT-A-C-A-T-C-GG---A-A-C-GT-G-C-C-CGA--TC-G-T-G-G--G-G-G---AT-AA-C--GA--G-G-C-G-A-A-A-----…
>H97X84I02GE030
G-A-C-G-A--A-C-G-C--T-G-G-C-G-G--C-A-T-G--C---C-T--AA-T--AC-A-T-G--C-A-A-G--T-C--GA-G-CG-A---------A-C----A-G--A-------------------------------CG-A-G-G-A-G------------------------CTT-G------------------------------C--T--C-C-T-C--T--------------------C-T----CT-GT--T-------AG-C-G-G-C-GA-A--T--G-GG-T-G-A-G-T-A--AC-A-C-G-T-G-GG---CAA-C-CTGC-C-C-TGT---A-G-T-T-G--G-G-G---AT-AA-C--TC--C-G-G-G-A-A-A-----…
>H97X84I02GDE7K
A-T-T-G-A--A-C-G-C--T-G-G-C-G-G--C-A-T-G--C---C-T--TA-C--AC-A-T-G--C-A-G-G--T-C--GA-A-CG-----------G-TAA--C-A--G--------------------------------------G-T-C------------------------CTC-G------------------------------G--A--T---------------------------G-C-T----G--AC--G-------AG-T-G-G-C-GA-A--C--G-GG-T-G-A-G-C-A--AT-A-C-A-T-C-GG---A-A-C-GT-G-C-C-C-G-ATC-G-T-G-G--G-G-G---AT-AA-T--GA--G-G-C-G-A-A-A-----…
>H97X84I02GCHGG
G-A-C-G-A--A-C-G-C--T-G-G-C-G-G--C-A-T-G--C---C-T--AA-C--AC-A-T-G--C-A-A-G--T-C--GA-A-CG-A---------G-A--------------------------------------------------C-C------------------------TTC-G------------------------------G--G------------------------------------------TC--T-------AG-T-G-G-C-GC-A--C--G-GG-T-G-C-G-T-A--AC-G-C-G-T-G-GG---A-A-T-CT-G-C-C-CTC--GG-G-T-T-C--G-G-A---AT-AA-C--TC--G-C-C-G-A-A-A-----…
>H97X84I02GBEXQ
G-A-C-G-A--A-C-G-C--T-G-G-C-G-G--C-G-T-G--C---C-T--AA-T--AC-A-T-G--C-A-A-G--T-C--GA-A-CG-----------G-AA---A-G--G--------------------------------C-C-C---T-G------------------------CTT-G------------------------------C--A----G-G-G-----------------------T-A----C--TC--G-------AG-T-G-G-C-GA-A--C--G-GG-T-G-A-G-T-A--AC-A-C-G-T-G-GG---TGA-T-CT-G-C-C-CTG--CA-C-T-T-C--G-G-G---AT-AA-G--CC--T-G-G-G-A-A-A-----…
>H97X84I02GB4AF
A-T-T-G-A--A-C-G-C--T-G-G-C-G-G--C-A-T-G--C---C-T--TA-C--AC-A-T-G--C-A-A-G--T-C--GA-A-CG-----------G-TAA--C-A--G--------------------------------------G-T-C------------------------TTC-G------------------------------G--A--T---------------------------G-C-T----G--AC--G-------AG-T-G-G-C-GA-A--C--G-GG-T-G-A-G-T-A--AT-A-C-A-T-C-GG---A-A-C-GT-G-C-C-CGA--TC-G-T-G-G--G-G-G---AT-AA-C--GA--G-G-C-G-A-A-A-----…
>H97X84I02GAZPZ
G-A-T-G-A--G-C-G-C--T-A-G-C-G-G--C-A-G-G--C---T-T--AA-C--AC-A-T-G--C-A-A-G--T-C--GC-G-GG-----------G-CAG--C-G--G----------------G-------------GAA-T-G-A----G-----------------------CTT-G----------------CT------------C--A--T-C---C--C------------------G-C-C----G--GC--G-------AC-C-G-G-C-GC-A--C--G-GG-T-G-A-G-T-A--AC-A-C-G-T-A-TG---CAA-C-CT-G-C-C-CCT--GT-C-A-G-G--G-G-G---AC-AA-C--CC--A-C-C-G-A-A-A-----…
>H97X84I02G7YRX
G-A-C-G-A--A-C-G-C--T-G-G-C-G-G--C-G-T-G--C---C-T--AA-T--AC-A-T-G--C-A-A-G--T-C--GA-A-CG-A---------A-C----C-G--C--------------A-A--------------CT---T-G-A-A------------------------CTT-G------------------------------T--T--C---T-C--GTT------------------A-A----G--GT--T-------AG-T-G-G-C-GC-A--C--G-GG-T-G-A-G-T-A--AC-A-C-G-T-G-GG---GAA-C-CT-G-C-C-CTT--TA-G-T-G-G--G-G-G---AT-AA-C--AG--T-C-G-G-A-A-A-----…
>H97X84I02G1PM4
A---T-G-A--A-C-G-C--T-G-G-C-G-G--C-G-T-G--C---C-T--AA-C--AC-A-T-G--C-A-A-G--T-C--GA-A-CG-----------G-TAA--C-A--G--------------------------------------G-T-C------------------------TTC-G------------------------------G--A--T---------------------------G-C-T----G--AC--G-------AG-T-G-G-C-GA-A--C--G-GG-T-G-A-G-T-A--AT-A-C-A-T-C-GG---A-A-C-GT-G-C-CCAGA---C-G-T-G-G--G-G-G---AT-AA-C--GA--G-G-C-G-A-A-A-----…
>H97X84I02G0JBQ
G-A-C-G-A--A-C-G-C--T-G-G-C-G-G--C-A-T-G--C---C-T--AA-T--AC-A-T-G--C-A-A-G--T-C--GA-G-CG-A---------A-C----A-G--A--------------------------------CGA-G-G-A-G------------------------CTT-G------------------------------C--T--C-CTC-T-----------------------C-T----CT-GT--T-------AG-C-G-G-C-GA-A--T--G-GG-T-G-A-G-T-A--AC-A-C-G-T-G-GG---CAA-C-CT-G-C-C-CTG--TA-G-T-T-G--G-G-G---AT-AA-C--TC--C-G-G-G-A-A-A-----…
>H97X84I02FZ2TW
G-A-T-G-A--A-C-G-C--T-A-G-C-G-G--C-A-G-G--C---T-T--AA-C--AC-A-T-G--C-A-A-G--T-C--GC-G-GG-----------G-CAG--C-G--G----------------G--------------GGAT-G-A----G-----------------------CTT-G----------------CT------------C--A--T-C---C--C------------------G-C-C----G--GC--G-------AC-C-G-G-C-GC-A--C--G-GG-T-G-A-G-T-A--AC-A-C-G-T-A-TG---CAA-C-CT-G-C-C-CCT--GT-C-A-G-G--G-G-G---AC-AA-C--CC--A-C-C-G-A-A-G-----…
>H97X84I02FZ2O9
G-A-C-G-A--A-C-G-C--T-A-G-C-G-G--C-A-G-G--C---T-T--AA-C--AC-A-T-G--C-A-A-G--T-C--GC-G-GG-----------G-CAG--C-G--G----------------G--------------GGAT-G-A----G-----------------------CTT-G----------------CT------------C--A--T-C---C--C------------------G-C-C----G--GC--G-------AC-C-G-G-C-GC-A--C--G-GG-T-G-A-G-T-A--AC-A-C-G-T-A-TG---CAA-C-CT-G-C-C-CCT--GT-C-A-G-G--G-G-G---AC-AA-C--CC--A-C-C-G-A-A-A-----…
>H97X84I02FX6R4
A---C-G-A--A-C-G-C--T-G-G-C-G-G--C-G-T-G--C---T-T--AA-C--AC-A-T-G--C-A-A-G--T-C--GA-A-CG-----------A-TGA--A-A--C----------------------------------T-C-T-A-G------------------------CTT-G------------------------------C--T--A-G-A-------------------------G-AA---G--AT--T-------AG-T-G-G-C-GG-A--C--G-GG-T-G-A-G-T-A--AC-A-T-T-T-A-GG---A-A-T-CT-G-C-C-TAG--TA-G-T-G-G--G-G-G---AT-AG-C--TC--G-G-G-G-A-A-A-----…
>H97X84I02FW3UJ
G-A-T-G-A--A-C-G-C--T-G-G-C-G-G--C-A-T-G--C---C-T--AA-T--AC-A-T-G--C-A-A-G--T-C--GA-G-CG-A---------A-C----A-G--A--------------------------------CGA-G-G-A-G------------------------CTT-G------------------------------C--T--C-CTC-T-----------------------C-T----CT-GT--T-------AG-C-G-G-C-GA-A--T--G-GG-T-G-A-G-T-A--GC-A-C-G-T-G-GG---CAA-C-CT-G-C-C-CTG--TA-G-T-T-G--G-G-G---AT-AA-C--TC--C-G-G-G-A-A-A-----…
>H97X84I02FRGIR
G-A-C-G-A--A-C-G-C--T-G-G-C-G-G--C-A-T-G--C---C-T--AA-T--AC-A-T-G--C-A-A-G--T-C--GA-G-CG-A---------A-C----A-G--A-------------------------------CG-A-G-G-A-G------------------------CTT-G------------------------------C--T--C-C-T-C--T--------------------C-T----CT-GT--T-------AG-C-G-G-C-GA-A--T--G-GG-T-G-A-G-T-A--AC-A-C-G-T-G-GG---CAA-C-CT-G-C-C-CTG--TA-G-T-T-G--G-G-G---AT-AA-C--TC--C-G-G-G-A-A-A-----…
>H97X84I02FQDBG
G-ATT-G-G--A-C-G-C--T-G-G-C-G-G--C-A-T-G--C---C-T--TA-C--AC-A-T-G--C-A-A-G--T-C--GA-A-CG-----------G-AA---A-G--G--------------------------------C-C-C---T-G------------------------CTT-G------------------------------C--A----G-G-G-----------------------T-A----C--TC--G-------AG-T-G-G-C-GA-A--C--G-GG-T-G-A-G-T-A--AC-A-C-G-T-G-GG---TGA-T-CT-G-C-C-CTG--CA-C-T-T-C--G-G-G---AT-AA-G--CC--T-G-G-G-A-A-A-----…
>H97X84I02FPBWT
G-A-T-G-A--A-C-G-C--T-G-G-C-G-G--C-G-T-G--C---C-T--AA-T--AC-A-T-G--C-A-A-G--T-C--GA-A-CG-C---------T-G----A-A--G-------------------------------CA-C-T-C-T-G------------------------CTT-G------------------------------C--A--G-G-G-T--G--------------------C-G----G--AT--G-------AG-T-G-G-C-GA-A--C--G-GG-T-G-A-G-T-A--AC-A-C-G-T-G-GG---GAA-T-CT-G-C-C-TAT--AA-G-T-G-G--G-G-G---AT-AA-C--AT--T-C-G-G-A-A-A-----…
>H97X84I02FOVX2
G-A-C-G-A--A-C-G-C--T-G-G-C-G-G--C-G-T-G--C---T-T--AA-C--AC-A-T-G--C-A-A-G--T-C--GA-A-CG-A---------A-G--------------------------------------------------G-C------------------------TTC-G------------------------------G--C------------------------------------------CT--T-------AG-T-G-G-C-GC-A--C--G-GG-T-G-C-G-T-A--AC-G-C-G-T-G-GG---A-A-T-CT-G-C-C-CTT--TG-G-T-T-C--G-G-A---AT-AA-C--AG--C-G-A-G-A-A-A-----…
>H97X84I02FM5BW
G-A-T-G-A--G-C-G-C--T-A-G-C-G-G--C-A-G-G--C---T-T--AA-T--AC-A-T-G--C-A-A-G--T-C--GA-G-GG-----------G-CAT--C-A--G-------------------------------C--T-T-A-T-A------------------------GCA-A------------------------------T--A--T-A-G----G------------------G-C-T----G--GC--G-------AC-C-G-G-C-AA-A--C--G-GG-T-G-C-G-G-A--AC-A-C-G-T-A-CA---CAA-C-CT-T-C-C-TTT--AA-G-A-G-G--G-G-G---AT-AG-C--CC--A-T-A-G-A-A-A-----…
>H97X84I02FKLH3
A-A-C-G-A--A-C-G-C--T-G-G-C-G-G--C-A-T-G--C---C-T--AA-C--AC-A-T-G--C-A-A-G--T-C--GA-A-CG-G-----------G----C-T-------------C-A---T---------------A-T-T-G-A--A---------------------------A------------C-CT--------------A--G--T-G-A-T---TT--AT-G--------------A-------GT--T-------AG-T-G-G-C-GG-A--C--G-GG-T-G-A-G-T-A--AC-G-C-G-T-G-GA---AAA-C-CT-G-C-C-GTA--TA-C-T-G-G--G-G-G---AT-AA-C--AC--T-T-A-G-A-A-A-----…
>H97X84I02F81P9
A-A-C-G-A--A-C-G-C--T-G-G-C-G-G--C-A-T-G--C---C-T--AA-C--AC-A-T-G--C-A-A-G--T-C--GA-A-CG-A---------G-A--------------------------------------------------C-C------------------------TTC-G------------------------------G--G------------------------------------------TC--T-------AG-T-G-G-C-GC-A--C--G-GG-T-G-C-G-T-A--AC-G-C-G-T-G-GG---G-A-T-CT-G-C-T-CTT--GG-G-T-T-C--G-G-A---AT-AA-C--TC--G-C-C---A-A-A-----…
>H97X84I02F6X79
G-A-T-G-A--A-C-G-C--T-G-G-C-G-G--C-G-T-G--C---T-T--AA-C--AC-A-T-G--C-A-A-G--T-C--GG-ACGG-A---------GTA------C--C----------CTC-G-A--------------AA-G-A-G-A-T------------------------TTC-G------------------------------G--T--C---A-A--TGG--AG-A------------G-GA---C--TACTT-------AG-T-G-G-C-GG-A--C--G-GG-T-G-A-G-T-A--AC-G-C-G-T-G-AG---GAA-C-CT-G-C-C-TTT--CA-G-T-G-G--G-G-G---AC-AA-C--AG--T-T-G-G-A-A-A-----…
>H97X84I02F6TKU
A-A-C-G-A--A-C-G-C--T-G-G-C-G-G--C-A-T-G--C---C-T--TA-C--AC-A-T-G--C-A-A-G--T-C--GA-A-CG-----------G-TAA--C-A--G--------------------------------------G-T-C------------------------TTC-G------------------------------G--A--T---------------------------G-C-T----G--AC--G-------AG-T-G-G-C-GA-A--C--G-GG-T-G-A-G-T-A--AT-A-C-A-T-C-GG---A-A-C-GT-G-C-C-CGA--TC-G-T-G-G--G-G-G---AT-AA-C--GA--A-G-C-G-A-A-A-----…
>H97X84I02F5HAH
A-A-C-G-A--A-C-G-C--T-G-G-C-G-G--C-A-T-G--C---C-T--TA-C--AC-A-T-G--C-A-A-G--T-C--GA-A-CG-----------G-TAA--C-A--G--------------------------------------G-T-C------------------------TTC-G------------------------------G--A--T---------------------------G-C-T----G--AC--G-------AG-T-G-G-C-GA-A--C--G-GG-T-G-A-G-T-A--AT-A-C-A-T-C-GG---A-A-C-GT-G-C-C-CGA--TC-G-T-G-G--G-G-G---AT-AA-C--GA--A-G-C-G-A-A-A-----…
>H97X84I02F5FIA
A-T-T-G-A--A-C-G-C--T-G-G-C-G-G--C-A-T-G--C---C-T--TA-C--AC-A-T-G--C-A-A-G--T-C--GA-A-CG-----------G-TAA--C-A--G--------------------------------------G----------------------------TT------------------------------------A--A---------------------------G-C-T----G--AC--G-------AG-T-G-G-C-GA-A--C--G-GG-T-G-A-G-T-A--AT-A-C-A-T-C-GG---A-A-C-GT-G-C-C-CGA--TC-G-T-G-G--G-G-G---AT-AA-C--GA--G-G-C-G-A-A-A-----…
>H97X84I02F51OA
A-T-T-G-A--A-C-G-C--T-G-G-C-G-G--C-A-G-G--C---C-T--AA-C--AC-A-T-G--C-A-A-G--T-C--GA-A-TG-----------G-TAA--C-A--G-------------------------------GA-A-A-C-A-G------------------------CTT-G------------------------------C--T--G-T-T-T--C------------------G-C-T----G--AC--G-------AG-T-G-G-C-GG-A--C--G-GG-T-G-A-G-T-A--AT-G-T-C-T-G-GG---A-A-A-CT-G-C-C-TGA--TG-G-A-G-G--G-G-G---AT-AA-C--TA--C-T-G-G-A-A-A-----…
>H97X84I02F0FE7
A-T-T-G-A--A-C-G-C--T-G-G-C-G-G--C-A-T-G--C---C-T--TA-C--AC-A-T-G--C-A-A-G--T-C--GA-A-CG-----------G-CAG--C-A--C------------------------------------G-G-A-C------------------------TTC-G------------------------------G--T--C-T-------------------------G-G-T----G--GC--G-------AG-T-G-G-C-GA-A--C--G-GG-T-G-A-G-T-A--AT-G-T-A-T-C-GG---A-A-C-GT-A-C-C-TTT--CA-G-T---G--G-G-G---AT-AA-C--GT--A-G-C-G-A-A-A-----…
>H97X84I02INJM9
G-A-T-G-A--A-C-G-C--T-G-G-C-G-G--C-G-T-G--C---T-T--AA-C--AC-A-T-G--C-A-A-G--T-C--GA-A-CG-----------G-AA---A-G--G--------------------------------C-C---C-T-G------------------------CTT-G------------------------------C-----A-G-G-G-----------------------T-A----C--TC--G-------AG-T-G-G-C-GA-A--C--G-GG-T-G-A-G-T-A--AC-A-C-G-T-G-GG---TGA-T-CT-G-C-C-CTG--TA-C-T-T-T--G-G-G---AT-AA-G--CC--T-G-G-G-A-A-A-----…
>H97X84I02JFIZM
A-A-C-G-A--A-C-G-C--T-G-G-C-G-G--C-A-T-G--C---C-T--AA-T--AC-A-T-G--C-A-A-G--T-C--GA-A-CG-A---------G-A--------------------------------------------------C-C------------------------TTC-G------------------------------G--G------------------------------------------TC--T-------AG-T-G-G-C-GC-A--C--G-GG-T-G-C-G-T-A--AC-G-C-G-T-G-GG---A-A-T-CT-G-C-C-CTT--GG-G-T-T-C--G-G-A---AT-AA-C--GT--C-G-G-G-A-A-A-----…
>H97X84I02IA8JX
G-A-T-G-A--A-C-G-C--T-A-G-C-G-G--G-A-G-G--C---C-T--AA-C--AC-A-T-G--C-A-A-G--C-C--GA-G-CG-G---------T-A----T-T--G------------------------------------T-T-T-C------------------------TTC-G------------------------------G--A--A-A---------------------------T-G----A--GA--G-------AG-C-G-G-C-GT-A--C--G-GG-T-G-C-G-G-A--AC-A-C-G-T-G-TG---CAA-C-CT-G-C-C-TTT--AT-C-T-G-G--G-G-G---AT-AG-C--CT--T-T-C-G-A-A-A-----…
>H97X84I02FS6P2
A-A-C-G-A--A-C-G-C--T-G-G-C-G-G--C-A-T-G--C---C-T--AA-T--AC-A-T-G--C-A-A-G--T-C--GA-A-CG-A---------G-A--------------------------------------------------T-C------------------------TTC-G------------------------------G--A------------------------------------------TC--T-------AG-T-G-G-C-GC-A--C--G-GG-T-G-C-G-T-A--AC-G-C-G-T-G-GG---A-A-T-CT-G-C-C-CTT--GG-G-T-T-C--G-G-A---AT-AA-C--TT--C-T-G-G-A-A-A-----…
>H97X84I02F4FUV
A-G-C-G-A--A-C-G-C--T-G-G-C-G-G--C-A-G-G--C---T-T--AA-C--AC-A-T-G--C-A-A-G--T-C--GA-G-CG-G---------A-C--------------------------------------------------C-T------------------------TTC-G------------------------------G--G------------------------------------------GT--C-------AG-C-G-G-C-GG-A--C--G-GG-T-G-A-G-T-A--AC-G-C-G-T-G-GG---A-A-C-GT-G-C-C-TTC--CG-G-T-T-C--G-G-A---AT-AA-C--CC--T-G-G-G-A-A-A-----…
>H97X84I02HVG8C
A-A-C-G-A--A-C-G-C--T-G-G-C-G-G--C-A-T-G--C---C-T--AA-C--AC-A-T-G--C-A-A-G--T-C--GA-A-CG-A---------A-G--------------------------------------------------G-C------------------------TTC-G------------------------------G--C------------------------------------------CT--T-------AG-T-G-G-C-GC-A--C--G-GG-T-G-C-G-T-A--AC-G-C-G-T-G-GG---A-A-T-CT-G-C-C-CTT--GG-G-T-T-C--G-G-A---AT-AA-C--AG--T-G-A-G-A-A-A-----…
>H97X84I02HERE6
A-G-C-G-A--A-C-G-C--T-G-G-C-G-G--C-A-G-G--C---T-T--AA-C--AC-A-T-G--C-A-A-G--T-C--GA-G-CG-G---------G-C------------------------------------------------A-C-C------------------------TTC-G------------------------------G--G--T---------------------------------------GT--C-------AG-C-G-G-C-AG-A--C--G-GG-T-G-A-G-T-A--AC-A-C-G-T-G-GG---A-A-C-GT-G-C-C-CTT--CG-G-T-T-C--G-G-A---AT-AA-C--TC--A-G-G-G-A-A-A-----…
>H97X84I02F3SAI
A---C-G-A--A-C-G-C--T-G-G-C-G-G--C-A-T-G--C---C-T--TA-C--AC-A-T-G--C-A-A-G--T-C--GA-A-CG-----------G-TAA--C-A--G--------------------------------------G-T-C------------------------TTC-G------------------------------G--A--T---------------------------G-C-T----G--AC--G-------AG-T-G-G-C-GA-A--C--G-GG-T-G-A-G-T-A--AT-A-C-A-T-C-GG---A-A-C-GT-G-C-C-CGA--TC-G-T-G-G--G-G-G---AT-AA-C--GA--A-G-C-G-A-A-A-----…
>H97X84I02FO37X
G-A-T-G-A--A-C-G-C--T-A-G-C-G-A--C-A-G-G--C---T-T--AA-C--AC-A-T-G--C-A-A-G--T-C--GA-G-GG-----------G-CAG--C-G--G----------------G--------------GC-A-G-G-A-AG-----------------------CTT-G----------------C-------------T--T--T-C-T-G--CC-----------------G-C-C----G--GC--G-------AC-C-G-G-C-GC-A--C--G-GG-T-G-A-G-T-A--AC-A-C-G-T-A-TG---CAA-C-CT-G-G-C-CGT--GA-C-A-G-A--T-G-G---AT-AA-C--CG--G-G-A-G-A-A-A-----…
>H97X84I02HDZZD
A-A-C-G-A--A-C-G-C--T-G-G-C-G-G--C-A-T-G--C---C-T--AA-T--AC-A-T-G--C-A-A-G--T-C--GA-A-CG-A---------G-A--------------------------------------------------T-C------------------------TTC-G------------------------------G--A------------------------------------------TC--T-------AG-T-G-G-C-GC-A--C--G-GG-T-G-C-G-T-A--AC-G-C-G-T-G-GG---A-A-T-CT-G-C-C-CTT--GG-G-T-T-C--G-G-A---AT-AA-C--TC--G-C-C-G-A-A-A-----…
>H97X84I02GA6HC
A-T-T-G-A--A-C-G-C--T-G-G-C-G-G--C-A-T-G--C---C-T--TA-C--AC-A-T-G--C-A-A-G--T-C--GA-A-CG-----------G-TAA--C-A--G--------------------------------------G-T-C------------------------TTC-G------------------------------G--A--C---------------------------G-C-T----G--AC--G-------AG-T-G-G-C-GA-A--C--G-AG-T-G-A-G-T-A--AT-A-C-A-T-C-GG---A-A-C-GT-G-C-C-CGA--TC-G-T-G-G--G-G-G---AT-AA-C--GA--A-G-C-G-A-A-A-----…
>H97X84I02G6S36
A-A-C-G-A--A-C-G-C--T-G-G-C-G-G--C-A-T-G--C---C-T--AA-C--AC-A-T-G--C-A-A-G--T-C--GA-A-CG-A---------G-A--------------------------------------------------C-C------------------------TTC-G------------------------------G--G------------------------------------------TC--T-------AG-T-G-G-C-GC-A--C--G-GG-T-G-C-G-T-A--AC-G-C-G-T-G-GG---A-A-T-CT-G-C-C-CTT--GG-G-T-T-C--G-G-A---AT-AA-C---G--TCG-G-G-A-A-A----C…
>H97X84I02J2F7S
A-T-T-G-A--A-C-G-C--T-G-G-C-G-G--C-A-T-G--C---C-T--TA-C--AC-A-T-G--C-A-A-G--T-C--GA-A-CG-----------G-TAA--C-A--G--------------------------------------G-T-C------------------------TTC-G------------------------------G--A--T---------------------------G-C-T----G--AC--G-------AG-T-G-G-C-GA-A--C--G-GG-T-G-A-G-T-A--AT-A-C-A-T-C-GG---A-A-C-GT-G-C-C-CGA--TC-G-T-G-G--G-G-G---AT-AA-C--GA--G-G-C-G-A-A-A-----…
>H97X84I02HY9PV
A-T-T-G-A--A-C-G-C--T-G-G-C-G-G--C-A-G-G--C---T-T--AA-C--AC-A-T-G--C-A-A-G--T-C--GA-A-CG-----------A-TGA--T-T--A----------------------------------T-C-T-A-G------------------------CTT-G------------------------------C--T--A-G-A-------------------------T-AT---G--AT--T-------AG-T-G-G-C-GG-A--C--G-GG-T-G-A-G-T-A--AC-A-T-T-T-A-GG---A-A-T-CT-G-C-C-TAG--TA-G-T-G-G--G-G-G---AT-AG-C--TC--G-G-G-G-A-A-A-----…
>H97X84I02F2T2P
T---T-G-A--A-C-G-C--T-G-G-C-G-G--C-A-T-G--C---C-T--TA-C--AC-A-T-G--C-A-A-G--T-C--GA-A-CG-----------G-TAA--C-A--G--------------------------------------G-T-C------------------------TTC-G------------------------------G--A--T---------------------------G-C-T----G--AC--G-------AG-T-G-G-C-GA-A--C--G-GG-T-G-A-G-T-A--AT-A-C-A-T-C-GG---A-A-C-GT-G-C-C-CGA--TC-G-T-G-G--G-G-G---AT-AA-C--GA--G-G-C-G-A-A-A-----…
>H97X84I02JHH7I
A-T-T-G-A--A-C-G-C--T-G-G-C-G-G--C-A-T-G--C---C-T--TA-C--AC-A-T-G--C-A-A-G--T-C--GA-A-CG-----------GCAGCA-C-G--G----------------------------------------A-C------------------------TTC-G------------------------------GT-C--T---------------------------G-G-T----G--GC--G-------AG-T-G-G-C-GA-A--C--G-GG-T-G-A-G-T-A--AT-A-C-A-T-C-GG---A-A-C-GT-G-C-CCAGA---C-G-T-G-G--G-G-G---AT-AA-C--GA--G-G-C-G-A-A-A-----…
>H97X84I02JTLSY
A---T-G-A--A-C-G-C--T-G-G-C-G-G--C-A-T-G--C---C-T--TA-C--AC-A-T-G--C-A-A-G--T-C--GA-A-CG-----------G-TAA--C-A--G--------------------------------------G-T-C------------------------TTC-G------------------------------G--A--T---------------------------G-C-T----G--AC--G-------AG-T-G-G-C-GA-A--C--G-GG-T-G-A-G-T-A--AT-A-C-A-T-C-GG---A-A-C-GT-G-C-C-CGA--TC-G-T-G-G--G-G-G---AT-AA-C--GA--G-G-C-G-A-A-A-----…
>H97X84I02JMKW2
G-A-C-G-A--A-C-G-C--T-G-G-C-G-G--C-G-T-G--C---C-T--AA-T--AC-A-T-G--C-A-A-G--T-C--GA-A-CG-A---------A-CC---G-C--G------------------------------ACG-A-G---A-A------------------------CTT-G---------------------------------T--T-C-TGG--T------------------C-A-A----G--GT--T-------AG-T-G-G-C-GC-A--C--G-GG-T-G-A-G-T-A--AC-A-C-G-T-G-GG---GAA-C-CT-G-C-C-CTT--TA-G-T-G-G--G-G-G---AT-AA-C--AG--T-C-G-G-A-A-A-----…
>H97X84I02GHH73
A-T-T-G-A--A-C-G-C--T-G-G-C-G-G--C-A-T-G--C---C-T--TA-C--AC-A-T-G--C-A-A-G--T-C--GA-A-CG-----------G-TAA--C-A--G--------------------------------------G-T-C------------------------TTC-G------------------------------G--A--T---------------------------G-C-T----G--AC--G-------AG-T-G-G-C-GA-A--C--G-GG-T-G-A-G-T-A--AT-A-C-A-T-C-GG---A-A-C-GT-G-C-C-CGA--TC-G-T-G-G--G-G-G---AT-AA-C--GA--G-G-C-G-A-A-A-----…
>H97X84I02IOC1X
A-G-C-G-A--G-C-G-C--T-G-G-C-G-G--C-A-T-G--C---C-T--TA-C--AC-A-T-G--C-A-A-G--T-C--GA-A-CG-----------G-TAA--C-A--G--------------------------------------G-T-C------------------------TTC-G------------------------------G--A--T---------------------------G-C-T----G--AC--G-------AG-T-G-G-C-GA-A--C--G-GG-T-G-A-G-T-A--AT-A-C-A-T-C-GG---A-A-C-GT-G-C-C-CGA--TC-G-T-G-G--G-G-G---AT-AA-C--GA--G-G-C-G-A-A-A-----…
>H97X84I02I1KNM
A---T-G-A--A-C-G-C--T-A-G-C-G-G--G-A-G-G--C---C-T--AA-C--AC-A-T-G--C-A-A-G--T-C--GA-A-CG-----------G-TAA--C-A--G--------------------------------------G-T-C------------------------TTC-G------------------------------G--A--T---------------------------G-C-T----G--AC--G-------AG-T-G-G-C-GA-A--C--G-GG-T-G-A-G-T-A--AT-A-C-A-T-C-GG---A-A-T-GT-G-C-C-CGA--TC-G-T-G-G--G-G-G---AT-AA-C--GA--G-G-C-G-A-A-A-----…
>H97X84I02HZRTJ
G-A-C-G-A--A-C-G-C--T-G-G-C-G-G--T-G-T-G--C---T-T--CA-C--AC-A-T-G--C-A-A-G--T-C--GA-A-CG-A---------G-G--------------------------------------------------T-A------------------------GCA-A------------------------------T--A------------------------------------------CC--T-------AG-T-G-G-C-GG-A--C--G-GG-T-G-C-G-T-A--AC-G-C-G-T-G-GG---A-G-T-CT-G-C-C-CTT--GG-G-T-T-C--G-G-A---AT-AA-C--TC--G-C-C-G-A-A-A-----…
>H97X84I02HEBIF
A-G-C-G-A--A-C-G-C--T-G-G-C-G-G--C-A-G-G--C---T-T--AA-C--AC-A-T-G--C-A-A-G--T-C--GA-G-CG-G---------A-C--------------------------------------------------C-T------------------------TTC-G------------------------------G--G------------------------------------------GT--C-------AG-C-G-G-C-GG-A--C--G-GG-T-G-A-G-T-A--AC-G-C-G-T-G-GG---A-A-C-GT-G-C-C-TTC--CG-G-T-T-C--G-G-A---AT-AA-C--CC--T-G-G-G-A-A-A-----…
>H97X84I02GVUFM
G-A-C-G-A--A-C-G-C--T-G-G-C-G-G--C-A-T-G--C---C-T--AA-T--AC-A-T-G--C-A-A-G--T-C--GA-A-CG-C---------T-G----A-A--G-------------------------------CA-C-T-C-T-G------------------------CTT-G------------------------------C--A--G-A-G-T--G--------------------C-G----G--AT--G-------AG-T-G-G-C-GA-A--C--G-GG-T-G-A-G-T-A--AC-A-C-G-T-G-GG---AAA-T-CT-G-C-C-TAT--AA-G-T-G-G--G-G-G---AT-AA-C--AT--T-C-G-G-A-A-A-----…
>H97X84I02GIOUB
A-T-T-G-A--A-C-G-C--T-G-G-C-G-G--C-A-T-G--C---C-T--TA-C--AC-A-T-G--C-A-A-G--T-C--GA-A-CG-----------G-TAA--C-A--G--------------------------------------G-T-C------------------------TTC-G------------------------------G--A--T---------------------------G-C-T----G--AC--G-------AG-T-G-G-T-GA-A--C--G-GG-T-G-A-G-T-A--AT-A-C-A-T-C-GG---A-A-C-GT-G-C-C-CGA--TC-G-T-G-G--G-G-G---AT-AA-C--GA--A-G-C-G-A-A-A-----…
>H97X84I02FXJBJ
A---C-G-A--A-C-G-C--T-G-G-C-G-G--C-A-T-G--C---C-T--TA-C--AC-A-T-G--C-A-A-G--T-C--GA-A-CG-----------G-TAA--C-A--G--------------------------------------G-T-C------------------------TTC-G------------------------------G--A--T---------------------------G-C-T----G--AC--G-------AG-T-G-G-C-GA-A--C--G-GG-T-G-A-G-T-A--AT-A-C-A-T-C-GG---A-A-C-GT-G-C-CCAGA---C-G-T-G-G--G-G-G---AT-AA-C--GA--G-G-C-G-A-A-A-----…
>H97X84I02G48JC
A-T-T-G-A--A-C-A-C--T-G-G-C-G-G--C-A-T-G--C---C-T--TA-C--AC-A-T-G--C-A-A-G--T-C--GA-A-CG-----------G-TAA--C-A---------------------------------------G-G-T-C------------------------TTC-G------------------------------G-----A-T-------------------------G-C-T----G--AC--G-------AG-T-G-G-C-GA-A--C--G-GG-T-G-A-G-T-A--AT-A-C-A-T-C-GG---A-A-C-GT-A-C-C-TTT--CA-G-T-G-G--G-G-G---AT-AA-C--GT--A-G-C-G-A-A-A-----…
>H97X84I02FNVC5
A---T-G-A--A-C-G-C--T-A-G-C-G-G--G-A-G-G--C---C-T--AA-C--AC-A-T-G--C-A-A-G--C-C--GA-G-CG-----------G-TAA--C-A--G--------------------------------------G-T-C------------------------TTC-G------------------------------G--A--T---------------------------G-C-T----G--AC--G-------AG-T-G-G-C-GA-A--C--G-GG-T-G-A-G-T-A--AT-A-C-A-T-C-GG---A-A-C-GT-G-C-C-CGA--TC-G-T-G-G--G-G-G---AT-AA-C--GA--A-G-C-G-A-A-A-----…
>H97X84I02JKXZF
A-T-T-G-A--A-C-G-C--T-G-G-C-G-G--A-A-T-G--C---T-T--TA-C--AC-A-T-G--C-A-A-G--T-C--GA-G-CG-----------G-CAG--CGC--G----------------------------------------G-G------------------------GCA-A------------------------------C--C--T---------------------------G-G-C----G--AC--G-------AG-C-G-G-C-GA-A--C--G-GG-T-G-A-G-T-A--AT-A-C-A-T-C-GG---A-A-C-GT-G-C-C-CGA--TC-G-T-G-G--G-G-G---AT-AA-C--GA--G-G-C-G-A-A-A-----…
>H97X84I02JGFYI
A-A-C-G-A--A-C-G-C--T-G-G-C-G-G--C-A-T-G--C---C-T--AA-T--AC-A-T-G--C-A-A-G--C-C--GA-A-CG-A---------A-G--------------------------------------------------G-C------------------------TTC-G------------------------------G--C------------------------------------------CT--T-------AG-T-G-G-C-GC-A--C--G-GG-T-G-C-G-T-A--AC-G-C-G-T-G-GG---A-A-T-CT-G-C-C-CTT--GG-G-T-T-C--G-G-A---AT-AA-C--TC--G-C-C-G-A-A-A-----…
>H97X84I02HG8LB
A-T-T-G-A--A-C-G-C--T-G-G-C-G-G--C-A-T-G--C---C-T--TA-C--AC-A-T-G--C-A-A-G--T-C--GA-A-CG-----------G-TA-----A--C------------------------------------A-G-G-T------------------------CTT-C------------------------------G--G--A-T-------------------------G-C-T----G--AC--G-------AG-T-G-G-C-GA-A--C--G-GG-T-G-A-G-T-A--AT-A-T-A-T-C-GG---A-A-C-GT-G-C-C-CAG--TA-G-T-G-G--G-G-G---AT-AA-C--TG--C-T-C-G-A-A-A-----…
>H97X84I02H0PSK
A-T-T-G-A--A-C-G-C--T-G-G-C-G-G--C-A-T-G--C---C-T--TA-C--AC-A-T-G--C-A-A-G--T-C--GA-A-CG-----------G-TAA--C-A---------------------------------------G-G-T-C------------------------TTC-G------------------------------G-----A-T-------------------------G-C-T----G--AC--G-------AG-T-G-G-C-GA-A--C--G-GG-T-G-A-G-T-A--AT-A-C-A-T-C-GG---A-A-C-GTGC-C-C-GAT--C--G-T-G-G--G-G-G---AT-AA-C--GA--G-G-C-G-A-A-A-----…
>H97X84I02IO6Z9
A-A-C-G-A--A-C-G-C--T-G-G-C-G-G--C-A-T-G--C---C-T--AA-C--AC-A-T-G--C-A-A-G--C-C--GA-G-CG-G---------T-A----T-T--G------------------------------------T-T-T-C------------------------TTC-G------------------------------G--A--A-A---------------------------T-G----A--GA--G-------AG-C-G-G-C-GT-A--C--G-GG-T-G-C-G-G-A--AC-A-C-G-T-G-TG---CAA-C-CT-G-C-C-TTT--AT-C-T-G-G--G-G-G---AT-AG-C--CT--T-T-C-G-A-A-A-----…
>H97X84I02INHVK
A-G-C-G-A--A-C-G-C--T-G-G-C-G-G--C-A-G-G--C---T-T--AA-C--AC-A-T-G--C-A-A-G--T-C--GA-A-CG-A---------G-A--------------------------------------------------C-C------------------------TTC-G------------------------------G--G------------------------------------------TC--T-------AG-T-G-G-C-GC-A--C--G-GG-T-G-C-G-T-A--AC-G-C-G-T-G-GG---A-A-T-CT-G-C-C-CTT--GG-G-T-T-C--G-G-A---AT-AA-C--TT--C-T-G-G-A-A-A-----…
>H97X84I02JAC5P
A---T-G-A--A-C-G-C--T-G-G-C-G-G--C-A-T-G--C---C-T--TA-C--AC-A-T-G--T-A-A-G--T-C--GA-A-CG-----------G-CAG--C-AC-G--------------------------------------G-A-C------------------------TTC-G------------------------------GT-C--T---------------------------G-G-T----G--GC--G-------AG-T-G-G-C-GA-A--C--G-GG-T-G-A-G-T-A--AT-A-C-A-T-C-GG---A-A-C-GT-G-C-C-CGA--TC-G-T-G-G--G-G-G---AT-AA-C--GA--G-G-C-G-A-A-A-----…
>H97X84I02HA4WF
A-A-C-G-A--A-C-G-C--T-G-G-C-G-G--C-A-T-G--C---C-T--AA-C--AC-A-T-G--C-A-A-G--T-C--GA-A-CG-A---------G-A--------------------------------------------------C-C------------------------TTC-G------------------------------G--G------------------------------------------TC--T-------AG-T-G-G-C-GC-A--C--G-GG-T-G-C-G-T-A--AC-G-C-G-T-G-GG---A-A-T-CT-G-C-C-CTT--GG-G-T-T-C--G-G-A---AT-AA-C--AG--T-G-A-G-A-A-A-----…
>H97X84I02HOLWY
G-A-C-G-A--A-C-G-C--T-G-G-C-G-G--C-G-T-G--C---T-T--AA-C--AC-A-T-G--C-A-A-G--T-C--GA-A-CG-A---------T-G----A-A--G--------------------------------C---C-C-A-G------------------------CTT-G------------------------------C--T--G-G---G-----------------------T-G----G--AA--G-------AG-T-G-G-C-GA-A--C--G-GG-T-G-A-G-T-A--AC-A-C-G-T-G-AG---TAA-C-CT-G-C-C-CTG--AA-C-T-C-T--G-G-G---AT-AA-G--CA--C-T-G-G-A-A-A-----…
>H97X84I02HMHPR
A-T-T-G-A--A-C-G-C--T-G-G-C-G-G--C-A-T-G--C---C-T--TA-C--AC-A-T-G--C-A-A-G--T-C--GA-A-CG-----------G-TAA--C-A--G--------------------------------------G-T-C------------------------TTC-G------------------------------G--A--T---------------------------G-C-T----G--AC--G-------AG-T-G-G-C-GA-A--C--G-GG-T-G-A-G-T-A--AT-A-C-A-T-C-GG---A-A-C-GT-G-C-C-CGG--AC-G-T-G-G--G-G-G---AT-AA-C--TA--C-T-C-G-A-A-A-----…
>H97X84I02H4MXI
A-T-T-G-G--A-C-G-C--T-G-G-C-G-G--C-A-T-G--C---C-T--TA-C--AC-A-T-G--C-A-A-G--T-C--GA-A-CG-----------G-TAA--C-A--G--------------------------------------G-T-C------------------------TTC-G------------------------------G--A--T---------------------------G-C-T----G--AC--G-------AG-T-G-G-C-GA-A--C--G-GG-T-G-A-G-T-A--AT-A-C-A-T-C-GG---A-A-C-GT-G-C-C-CAG--AC-G-T-G-G--G-G-G---AT-AA-C--GA--G-G-C-G-A-A-A-----…
>H97X84I02GZW3W
G-A-T-G-A--A-C-G-C--T-G-G-C-G-G--C-G-T-G--C---C-T--AA-T--AC-A-T-G--C-A-A-G--T-C--GA-G-CG-A---------A-C----A-G--A-------------------------------TA-A-G-G-A-G------------------------CTT-G------------------------------C--T--C-C-T-T--T--------------------G-A----A--GT--T-------AG-C-G-G-C-GG-A--C--G-GG-T-G-A-G-T-A--AC-A-C-G-T-G-GG---TAA-C-CT-A-C-C-TAT--AA-G-A-C-T--G-G-G---AT-AA-C--TT--C-G-G-G-A-A-A-----…
>H97X84I02GX5KS
A-A-C-G-A--G-C-G-C--T-G-G-C-G-G--C-A-T-G--C---C-T--AA-T--AC-A-T-G--C-A-A-G--T-C--GA-A-CG-----------G-TAA--C-A--G--------------------------------------G-T-C------------------------TTC-G------------------------------G--A--T---------------------------G-C-T----G--AC--G-------AG-T-G-G-C-GA-A--C--G-GG-T-G-A-G-T-A--AT-A-C-A-T-C-GG---A-A-C-GT-G-C-C-CGA--TC-G-T-G-G--G-G-G---AT-AA-C--GA--G-G-C-G-A-A-A-----…
>H97X84I02GUX1C
A-G-C-G-A--A-C-G-C--T-G-G-C-G-G--C-A-G-G--C---C-T--AA-C--AC-A-T-G--C-A-A-G--T-C--GA-A-CG-----------G-TAA--C-A--G--------------------------------------G-T-C------------------------TTC-G------------------------------G--A--T---------------------------G-C-T----G--AC--G-------AG-T-G-G-C-GA-A--C--G-GG-T-G-A-G-T-A--AT-A-C-A-T-C-GG---A-A-C-GT-G-C-C-CGA--TC-G-T-G-G--G-G-G---AT-AA-C--GA--G-G-C-G-A-A-A-----…
>H97X84I02GTDOP
A-G-C-G-A--A-C-G-C--T-G-G-C-G-G--C-A-G-G--C---T-T--AA-C--AC-A-T-G--C-A-A-G--T-C--GA-A-CG-G---------G-C------------------------------------------------A---C------------------------TTC-G------------------------------G-----T---------------------------------------GC--T-------AG-T-G-G-C-AG-A--C--G-GG-T-G-A-G-T-A--AC-G-C-G-T-G-GG---A-A-C-GT-G-C-C-TTT--CG-G-T-T-C--G-G-A---AT-AA-T--CC--A-G-G-G-A-A-A-----…
>H97X84I02GG9A8
A-T-T-G-A--A-C-G-C--T-G-G-C-G-G--C-A-T-G--C---C-T--TA-C--AC-A-T-G--C-A-A-G--T-C--GA-A-CG-----------G-TAA--C-A--G--------------------------------------G-T-C------------------------TTC-G------------------------------G--A--T---------------------------G-C-T----G--AC--G-------AG-T-G-G-C-GA-A--C--G-GG-T-G-A-G-T-A--AT-G-T-A-T-C-GG---A-A-C-GT-A-C-C-TTT--CA-G-T-G-G--G-G-G---AT-AA-C--GT--A-G-C-G-A-A-A-----…
>H97X84I02HJA43
A-T-T-G-A--A-C-G-C--T-G-G-C-G-G--C-A-T-G--C---C-T--TA-C--AC-A-T-G--C-A-A-G--T-C--GA-A-CG-----------G-TA-----A--C------------------------------------A-G-G-T------------------------CTT-C------------------------------G--G--A-T-------------------------G-C-T----G--AC--G-------AG-T-G-G-C-GA-A--C--G-GG-T-G-A-G-T-A--AT-A-C-A-T-C-GG---A-A-C-GT-G-C-C-CGA--TC-G-T-G-G--G-G-G---AT-AA-C--GA--G-G-C-G-A-A-A-----…
>H97X84I02GD04O
A-T-T-G-A--A-C-G-C--T-G-G-C-G-G--C-A-G-G--C---T-T--AA-C--AC-A-T-G--C-A-A-G--T-C--GA-G-CG-G---------G-G----G-A--G----------------------------------A-T-T-G-C------------------------TTC-G------------------------------G--T--A-A-T-------------------------T-G----A--CC--T-------AG-C-G-G-C-GG-A--C--G-GG-T-G-A-G-T-A--AT-A-C-T-T-A-GG---A-A-T-CT-G-C-C-TAT--TA-A-T-G-G--G-G-G---AC-AA-C--AT--C-T-C-G-A-A-A-----…
>H97X84I02G1NOT
A---C-G-A--A-C-G-C--T-G-G-C-G-G--C-G-T-G--C---C-T--AA-T--AC-A-T-G--C-A-A-G--T-C--GA-A-CG-----------G-CAG--C-A--C------------------------------------G-G-A-C------------------------TTC-G------------------------------G--T--C-T-------------------------G-G-T----G--GC--G-------AG-T-G-G-C-GA-A--C--G-GG-T-G-A-G-T-A--AT-G-T-A-T-C-GG---A-A-C-GT-A-C-C-TTT--CA-G-T-G-G--G-G-G---AT-AA-C--GT--A-G-C-G-A-A-A-----…
>H97X84I02FY377
A-G-C-G-A--A-C-G-C--T-G-G-C-G-G--C-A-G-G--C---T-T--AA-C--AC-A-T-G--C-A-A-G--T-C--GA-G-CG-G---------G-CAT------------------------------------------------C-C------------------------TTGTG------------------------------G--T------------------------------------------GT--C-------AG-C-G-G-C-AG-A--C--G-GG-T-G-A-G-T-A--AC-G-C-G-T-G-GG---A-A-C-GT-G-C-C-CTT--CG-G-T-T-C--G-G-A---AT-AA-C--TC--A-G-G-G-A-A-A-----…
>H97X84I02FVF2K
G-A-T-G-A--A-C-G-C--T-G-G-C-G-G--C-G-T-G--C---T-T--AA-C--AC-A-T-G--C-A-A-G--T-C--GA-A-CG-----------G-AA---A-G--G--------------------------------C-C---C-T-G------------------------CTT-G------------------------------C--A--G---G-G-----------------------T-A----C--TC--G-------AG-T-G-G-C-GA-A--C--G-GG-T-G-A-G-T-A--AC-A-C-G-T-G-GG---TGA-T-CT-G-C-C-CTG--TA-C-T-T-T--G-G-G---AT-AA-G--CC--T-G-G-G-A-A-A-----…
>H97X84I02GZAQ3
A-T-T-G-A--A-C-G-C--T-A-G-C-G-G--G-A-T-G--C---T-T--TA-C--AC-A-T-G--C-A-A-G--T-C--GA-A-CG-----------GCAGCG-CGA--GAA------------------------------------A-G-C-----------------------TTGCTTT-----------------------------C--T--T---------------------------G-G-C----G--GC--G-------AG-T-G-G-C-GA-A--C--G-GG-T-G-A-G-T-A--AT-G-T-A-T-C-GG---A-A-C-GT-G-C-C-CGA--TC-G-T-G-G--G-G-G---AT-AA-C--GA--A-G-C-G-A-A-A-----…
>H97X84I02F5P5F
A-T-T-G-A--A-C-G-C--T-G-G-C-G-G--C-A-T-G--C---C-T--TA-C--AC-A-T-G--C-A-A-G--T-C--GA-A-CG-----------G-TAA--C-A--G--------------------------------------G-T-C------------------------TTT-G------------------------------G--A--T---------------------------G-C-T----G--AC--G-------AG-T-G-G-C-GA-A--C--G-GG-T-G-A-G-T-A--AT-A-C-A-T-C-GG---A-A-C-GT-G-C-C-CGA--TC-G-T-G-G--G-G-G---AT-AA-C--GA--A-G-C-G-A-A-A-----…
>H97X84I02F0AVE
A-T-T-G-A--A-C-G-C--T-G-G-C-G-G--C-A-T-G--C---C-T--TA-C--AC-A-T-G--C-A-A-G--T-C--GA-A-CG-----------GCAGCA-C-G--G----------------------------------------A-C------------------------TTC-G------------------------------GT-C--T---------------------------G-G-T----G--GC--G-------AG-T-G-G-C-GA-A--C--G-GG-T-G-A-G-T-A--AT-G-T-A-T-C-GG---A-A-C-GT---A-C-CTT--TCAG-T-G-G--G-G-G---AT-AA-C--GA--G-G-C-G-A-A-A-----…
>H97X84I02JYX5G
A-T-T-G-A--A-C-G-C--T-G-G-C-G-G--C-A-T-G--C---C-T--TA-C--AC-A-T-G--C-A-A-G--T-C--GA-A-CG-----------G-TAA--C-A--G--------------------------------------G-T-C------------------------TTC-G------------------------------G--G--T---------------------------G-C-T----G--AC--G-------AG-T-G-G-C-GA-A--C--G-GG-T-G-A-G-T-A--AT-A-C-A-T-C-GG---A-A-C-GT-G-C-C-CGA--TC-G-T-G-G--G-G-G---AT-AA-C--GA--A-G-C-G-A-A-A-----…
>H97X84I02JY1XA
A-A-C-G-A--A-C-G-C--T-G-G-C-G-G--C-A-T-G--C---C-T--AA-C--AC-A-T-G--C-A-A-G--T-C--GA-A-C--------------G----A----G----------------------------------A-------C------------------------CTT----------------------------------------C-G-------------------------G-G----T--C---T-------AG-T-G-G-C-GC-A--C--G-GG-T-G-C-G-T-A--AC-G-C-G-T-G-GG---A-A-T-CT-G-C-C-TAT--TA-G-T-G-G--G-G-G---AC-AA-C--AT--T-C-C-G-A-A-A-----…
>H97X84I02JXE6F
A-T-T-G-A--A-C-G-C--T-G-G-C-G-G--C-A-G-G--C---T-T--AA-C--AC-A-T-G--C-A-A-G--T-C--GA-G-CG-G---------A-G----A-T--G----------------------------------A-G-G-T-G------------------------CTT-G------------------------------C--A--C-C-C-------------------------T-A----T--CT--T-------AG-C-G-G-C-GG-A--C--G-GG-T-G-A-G-T-A--AT-A-C-T-T-A-GG---A-A-T-CT-G-C-C-TAT--TA-A-T-G-G--G-G-G---AC-AA-C--AT--C-T-C-G-A-A-A-----…
>H97X84I02JWYPX
G-A-C-G-A--A-C-G-C--T-G-G-C-G-G--C-G-T-G--C---T-T--AA-C--AC-A-T-G--C-A-A-G--T-C--GA-A-CG-----------G-AA---A-G--G--------------------------------C-C-C---T-G------------------------CTT-G------------------------------C--A----G-G-G-----------------------T-A----C--TC--G-------AG-T-G-G-C-GA-A--C--G-GG-T-G-A-G-T-A--AC-A-C-G-T-G-GG---TGA-T-CT-G-C-C-CTG--TA-C-T-T-T--G-G-G---AT-AA-G--CC--T-G-G-G-A-A-A-----…
>H97X84I02JWB4C
A-T-T-G-A--A-C-G-C--T-G-G-C-G-G--C-A-T-G--C---C-T--TA-C--AC-A-T-G--C-A-A-G--T-C--GA-A-CG-----------G-TAA--C-A--G--------------------------------------G-T-C------------------------TTC-G------------------------------G--A--T---------------------------G-C-T----G--AC--G-------AG-T-G-G-C-GA-A--C--G-GG-T-G-A-G-T-A--AT-A-C-A-T-C-GG---A-A-C-GT-G-C-C-C----AC-G-T-G-G--G-G-G---AT-AA-C--GA----G-C-G-A-A-A-----…
>H97X84I02JVHF2
A-T-T-G-A--A-C-G-C--T-A-G-C-G-G--G-A-T-G--C---T-T--TA-C--AC-A-T-G--C-A-A-G--T-C--GA-A-CG-----------G-CAG--C-G--C----------------G--------------A--G-A-A-A-G------------------------CTT-G------------------------------C--T--T---T-C--TT-----------------G-G-C----G--AC--G-------AG-T-G-G-C-GA-A--C--G-GG-T-G-A-G-T-A--AT-G-T-A-T-C-GG---A-A-C-GT-G-C-C-CAG--TA-A-C-G-G--G-G-G---AT-AA-C--TG--G-C-C-G-A-A-A-----…
>H97X84I02JV9IC
A-T-T-G-A--A-C-G-C--T-G-G-C-G-G--C-A-T-G--C---C-T--TA-C--AC-A-T-G--C-A-A-G--T-C--GA-A-CG-----------G-TAA--C-A--G--------------------------------------G-T-C------------------------TTC-G------------------------------G--A--T---------------------------G-C-T----G--AC--G-------AG-T-G-G-C-GA-A--C--G-GG-T-G-A-G-T-A--AT-A-C-A-T-C-GG---A-A-C-GT-G-C-C-CGA--TC-G-T-G-G--G-G-G---AT-AA-C--GA--G-G-C-G-A-A-A-----…
>H97X84I02JTD55
A---T-G-A--A-C-G-C--T-G-G-C-G-G--C-G-T-G--C---T-T--AA-C--AC-A-T-G--C-A-A-G--T-C--GA-A-CG-----------G-TAA--C-A--G--------------------------------------G-T-C------------------------TTC-G------------------------------G--A--T---------------------------G-C-T----G--AC--G-------AG-T-G-G-C-GA-A--C--G-GG-T-G-A-G-T-A--AT-A-C-A-T-C-GG---A-A-C-GT-G-C-C-CGA--TC-G-T-G-G--G-G-G---AT-AA-C--GA--A-G-C-G-A-A-A-----…
>H97X84I02JSPR9
G-A-T-G-A--A-C-G-C--T-G-G-C-G-G--C-G-T-G--C---T-T--AA-C--AC-A-T-G--C-A-A-G--T-C--GA-A-CG-G-----------G----C-T-------------C-A---T---------------A-T-T-G-A--A---------------------------A------------C-CT--------------A--G--T-G-A-T---TT--AT-G--------------A-------GT--T-------AG-T-G-G-C-GG-A--C--G-GG-T-G-A-G-T-A--AC-G-C-G-T-G-GA---AAA-C-CT-G-C-C-GTA--TA-C-T-G-G--G-G-G---AT-AA-C--AC--T-T-A-G-A-A-A-----…
>H97X84I02JSL1Z
A-A-C-G-A--A-C-G-C--T-G-G-C-G-G--C-A-T-G--C---C-T--AA-T--AC-A-T-G--C-A-A-G--T-C--GA-A-CG-A---------G-A--------------------------------------------------C-C------------------------TTC-G------------------------------G--G------------------------------------------TC--T-------AG-T-G-G-C-GC-A--C--G-GG-T-G-C-G-T-A--AC-G-C-G-T-G-GG---A-A-T-CT-G-C-C-CTT--GG-G-T-T-C--G-G-A---AT-AA-CG-TC--G---G-G-A-A-A-----…
>H97X84I02JSIJM
A-A-C-G-A--A-C-G-C--T-G-G-C-G-G--C-A-T-G--C---C-T--AA-C--AC-A-T-G--C-A-A-G--T-C--GA-G-CG-G---------A-G----A-T--G----------------------------------A-G-G-T-G------------------------CTT-G------------------------------C--A--C-C-T-------------------------T-A----T--CT--T-------AG-C-G-G-C-GG-A--C--G-GG-T-G-A-G-T-A--AT-G-C-T-T-A-GG---A-A-T-CT-G-C-C-TAT--TA-G-T-G-G--G-G-G---AC-AA-C--AT--T-C-C-G-A-A-A-----…
>H97X84I02JQYZI
A---T-G-A--A-C-G-C--T-A-G-C-G-G--G-A-G-G--C---C-T--AA-C--AC-A-T-G--C-A-A-G--T-C--GA-A-CG-G---------A-C--------------------------------------------------C-C------------------------TTC-G------------------------------G--G------------------------------------------GT--T-------AG-T-G-G-C-GG-A--C--G-GG-T-G-A-G-T-A--AC-A-C-G-T-G-GG---A-A-C-GT-G-C-C-TTT--AG-G-T-T-C--G-G-A---AT-AG-C--TC--C-T-G-G-A-A-A-----…
>H97X84I02JQALG
A-A-C-G-A--A-C-G-C--T-G-G-C-G-G--C-A-G-G--C---T-T--AA-C--AC-A-T-G--C-A-A-G--T-C--GA-G-CG-G---------A-G----A-T--G----------------------------------A-G-G-T-G------------------------CTT-G------------------------------C--A--C-C-T-------------------------T-A----T--CT--T-------AG-C-G-G-C-GG-A--C--G-GG-T-G-A-G-T-A--AT-G-C-T-T-A-GG---A-A-T-CT-G-C-C-TAT--TA-G-T-G-G--G-G-G---AC-AA-C--AT--T-C-C-G-A-A-A-----…
>H97X84I02JP8NB
G-ATT-G-A--A-C-G-C--T-G-G-C-G-G--G-A-G-G--C---C-T--AA-C--AC-A-T-G--C-A-A-G--C-C--GA-G-CG-G---------T-A----T-T--G------------------------------------T-T-T-C------------------------TTC-G------------------------------G--A--A-A---------------------------T-G----A--GA--G-------AG-C-G-G-C-GT-A--C--G-GG-T-G-C-G-G-A--AC-A-C-G-T-G-TG---CAA-C-CT-G-C-C-TTT--AT-C-T-G-G--G-G-G---AT-AG-C--CT--T-T-C-G-A-A-A-----…
>H97X84I02JOKB3
A-A-C-G-A--A-C-G-C--T-G-G-C-G-G--C-A-T-G--C---C-T--AA-C--AC-A-T-G--C-A-A-G--T-C--GA-A-CG-A---------G-A------------------------------------------------C---C------------------------TTC-G------------------------------G-----G---------------------------------------TC--T-------AG-T-G-G-C-GC-A--C--G-GG-T-G-C-G-T-A--AC-G-C-G-T-G-GG---A-A-C-GT-G-C-C-TTT--CG-G-T-T-C--G-G-A---AT-AA-T--CC--A-G-G-G-A-A-A-----…
>H97X84I02JO639
A---C-G-A--A-C-G-C--T-G-G-C-G-G--T-G-T-G--C---T-T--CA-C--AC-A-T-G--C-A-A-G--T-C--GA-A-CG-----------G-TAG--C-A--G--------------------------------------G-T-C------------------------TTC-G------------------------------G--A--T---------------------------G-C-T----G--AC--G-------AG-T-G-G-C-GA-A--C--G-GG-T-G-A-G-T-A--AT-A-C-A-T-C-GG---A-A-C-GT-G-C-C-CGA--TC-G-T-G-G--G-G-G---AT-AA-C--GA--G-G-C-G-A-A-A-----…
>H97X84I02JMTW2
A-T-T-G-A--A-C-G-C--T-G-G-C-G-G--C-A-T-G--C---C-T--TA-C--AC-A-T-A--C-A-A-G--T-C--GA-A-CG-----------G-CAG--C-A--C------------------------------------G-G-A-C------------------------TTC-G------------------------------G--T--C-T-------------------------G-G-T----G--GC--G-------AG-T-G-G-C-GA-A--C--G-GG-T-G-A-G-T-A--AT-G-T-A-T-C-GG---A-A-C-GT-A-C-C-TTT--CA-G-T-G-G--G-G-G---AT-AA-C--GT--A-G-C-G-A-A-A-----…
>H97X84I02JLEEK
G-A-T-G-A--A-C-G-C--T-A-G-C-G-G--G-A-G-G--C---C-T--AA-C--AC-A-T-G--C-A-A-G--C-C--GA-G-TG-G---------T-A----T-T--T------------------------------------G-T-T-C------------------------TTC-G------------------------------G--A--A-A---------------------------T-G----A--GA--G-------AG-C-G-G-C-GT-A--C--G-GG-T-G-C-G-G-A--AC-A-C-G-T-G-TG---CAA-C-CT-G-C-C-TTT--AT-C-T-G-G--G-G-G---AT-AG-C--CT--T-T-C-G-A-A-G-----…
>H97X84I02J79IZ
A-G-C-G-A--A-C-G-C--T-G-G-C-G-G--C-A-T-G--C---C-T--AA-C--AC-A-T-G--C-A-A-G--T-C--GA-A-CG-A---------A-G--------------------------------------------------G-C------------------------TTC-G------------------------------G--C------------------------------------------CT--T-------AG-T-G-G-C-GC-A--C--G-GG-T-G-C-G-T-A--AC-G-C-G-T-G-GG---A-A-T-CT-G-C-C-CTT--GG-G-T-T-C--G-G-A---AT-AA-C--TC--G-C-C-G-A-A-A-----…
>H97X84I02JKKO3
A-T-T-G-A--A-C-G-C--T-G-G-C-G-G--C-A-G-G--C---T-T--AA-C--AC-A-T-G--C-A-A-G--T-C--GA-A-CG-----------G-TAA--C-A--G--------------------------------------G-T-C------------------------TTC-G------------------------------G--A--T---------------------------G-C-T----G--AC--G-------AG-T-G-G-C-GA-A--C--G-GG-T-G-A-G-T-A--AT-A-C-A-T-C-GG---A-A-C-GT-G-C-C-CGA--TC-G-T-G-G--G-G-G---AT-AA-C--GA--A-G-C-G-A-A-A-----…
>H97X84I02JKDY9
A---T-G-A--A-C-G-C--T-G-G-C-G-G--C-A-T-G--C---C-T--TA-C--AC-A-T-G--C-A-A-G--T-C--GA-A-CG-----------G-TAA--C-A--G--------------------------------------G-T-C------------------------TTC-G------------------------------G--A--T---------------------------G-C-T----G--AC--G-------AG-T-G-G-C-GA-A--C--G-GG-T-G-A-G-T-A--AT-A-C-A-T-C-GG---A-A-C-GT-G-C-C-CAG--AC-G-T-G-G--G-G-G---AT-AA-CT-AC----T-C-G-A-A-A-----…
>H97X84I02JK52X
A-A-C-G-A--A-C-G-C--T-G-G-C-G-G--C-A-T-G--C---C-T--AA-C--AC-A-T-G--C-A-A-G--T-C--GA-A-CG-A---------G-A------------------------------------------------C---C------------------------TTC-G------------------------------G-----G---------------------------------------TC--T-------AG-T-G-G-C-AG-A--C--G-GG-T-G-A-G-T-A--AC-G-C-G-T-G-GG---A-A-C-GT-G-C-C-TTT--CG-G-T-T-C--G-G-A---AT-AA-T--CC--A-G-G-G-A-A-A-----…
>H97X84I02JJDN7
G-A-C-G-A--A-C-G-C--T-G-G-C-G-G--C-G-T-G--C---C-T--AA-T--AC-A-T-G--C-A-A-G--T-C--GA-A-CG-A---------A-CC---G-C--A-------------------------------AC-T-T-G-A-A------------------------CTT-G---------------------------------T--T-C-T-CG-T------------------T-A-A----G--GT--T-------AG-T-G-G-C-GC-A--C--G-GG-T-G-A-G-T-A--AC-A-C-G-T-G-GG---GAA-C-CT-G-C-C-CTT--TA-G-T-G-G--G-G-G---AT-AA-C--AG--T-C-G-G-A-A-A-----…
>H97X84I02JDMGV
A---T-G-A--A-C-G-C--T-G-G-C-G-G--C-A-T-G--C---C-T--TA-C--AC-A-T-G--C-A-A-G--T-C--GA-A-CG-----------G-TAA--C-A--G--------------------------------------G-T-C------------------------TTT-G------------------------------G--A--T---------------------------G-C-T----G--AC--G-------AG-T-G-G-C-GA-A--C--G-GG-T-G-A-G-T-A--AT-A-C-A-T-C-GG---A-A-C-GT-G-C-C-CGA--TC-G-T-G-G--G-G-G---AT-AA-C--GA--T-G-C-G-A-A-A-----…
>H97X84I02JCRWJ
A---T-G-A--A-C-G-C--T-G-G-C-G-G--C-G-T-G--C---C-T--AA-C--AC-A-T-G--C-A-A-G--T-C--GA-A-CG-G---------G-C------------------------------------------------G-T-A------------------------GCA-A------------------------------T--A--C---------------------------------------GT--C-------AG-C-G-G-C-AG-A--C--G-GG-T-G-A-G-T-A--AC-G-C-G-T-G-GG---A-A-C-GT-A-C-C-TTT--TG-G-T-T-C--G-G-A---AC-AA-C--AC--A-G-G-G-A-A-A-----…
>H97X84I02JCQY9
A-T-T-G-A--A-C-G-C--T-G-G-C-G-G--C-A-T-G--C---C-T--TA-C--AC-A-T-G--C-A-A-G--T-C--GA-A-CG-----------G-CAG--C-A--C------------------------------------G-G-A-C------------------------TTC-G------------------------------G--T--C-T-------------------------G-G-T----G--GC--G-------AG-T-G-G-C-GA-A--C--G-GG-T-G-A-G-T-A--AT-G-T-A-T-C-GG---A-A-C-GT-A-C-C-TTT--CA-G-T-G-G--G-G-G---AT-AA-C--GT--A-G-C-G-A-A-A-----…
>H97X84I02JCL1K
G-A-T-G-A--A-C-G-C--T-A-G-C-G-G--G-A-G-G--C---C-T--AA-C--AC-A-T-G--C-A-A-G--C-C--GA-G-CA-G---------T-A----T-T--G------------------------------------T-T-T-C------------------------TTC-G------------------------------G--A--A-A---------------------------T-G----A--GA--G-------AG-C-G-G-C-GT-A--C--G-GG-T-G-C-G-G-A--AC-A-C-G-T-G-TG---CAA-C-CT-G-C-C-TTT--AT-C-T-G-G--G-G-G---AT-AG-C--CT--T-T-C-G-A-A-A-----…
>H97X84I02J5UHU
A-T-T-G-A--A-C-G-C--T-G-G-C-G-G--C-A-T-G--C---C-T--TA-C--AC-A-T-G--C-A-A-G--T-C--GA-A-CG-----------G-CAG--C-AC-G--------------------------------------G-A-C------------------------TTC-G------------------------------GT-C--T---------------------------G-G-T----G--GC--G-------AG-T-G-G-C-GA-A--C--G-GG-T-G-A-G-T-A--AT-A-C-A-T-C-GG---A-A-C-GT-G-C-C-CGA--TC-G-T-G-G--G-G-G---AT-AA-C--GA--A-G-C-G-A-A-A-----…
>H97X84I02JAL8H
A---C-G-A--A-C-G-C--T-G-G-C-G-G--C-G-T-G--C---C-T--AA-T--AC-A-T-G--C-A-A-G--T-C--GA-G-CG-G---------A-G----A-T--G----------------------------------A-G-G-T-G------------------------CTT-G------------------------------C--A--C-C-T-------------------------T-A----T--CT--T-------AG-C-G-G-C-GG-A--C--G-GG-T-G-A-G-T-A--AT-G-C-T-T-A-GG---A-A-T-CT-G-C-C-TAT--TA-G-T-G-G--G-G-G---AC-AA-C--AT--T-C-C-G-A-A-A-----…
>H97X84I02J7J65
A-T-T-G-A--A-C-G-C--T-G-G-C-G-G--C-A-T-G--C---C-T--AA-T--AC-A-T-G--C-A-A-G--T-C--GA-A-CG-A---------G-A--------------------------------------------------C-C------------------------TTC-G------------------------------G--G------------------------------------------TC--T-------AG-T-G-G-C-GC-A--C--G-GG-T-G-C-G-T-A--AC-G-C-G-T-G-GG---A-A-T-CT-G-C-C-CTT--GG-G-C-T-C--G-G-A---AT-AA-C--GT--C-G-G-G-A-A-A-----…
>H97X84I02J5FKV
A-T-T-G-A--A-C-G-C--T-G-G-C-G-G--C-A-T-G--C---C-T--AA-C--AC-A-T-G--C-A-A-G--T-C--GA-A-CG-A---------G-A--------------------------------------------------C-C------------------------TTC-G------------------------------G--G------------------------------------------TC--T-------AG-T-G-G-C-GC-A--C--G-GG-T-G-C-G-T-A--AC-G-C-G-T-G-GG---A-G-T-CT-G-C-C-CTT--GG-G-T-T-C--G-G-A---AT-AA-C--TC--G-C-C-G-A-G-A-----…
>H97X84I02J2YAT
A-T-T-G-A--A-C-G-C--T-G-G-C-G-G--A-A-T-G--C---T-T--TA-C--AC-A-T-G--C-A-A-G--T-C--GA-G-CG-----------G-CAG--C-G--C--------------------------------------G-G-G------------------------GCA-A------------------------------C--C--T---------------------------G-G-C----G--AC--G-------AG-C-G-G-C-GA-A--C--G-GG-T-G-A-G-T-A--AT-A-C-A-T-C-GG---A-A-C-GT-G-C-CCAGA---C-G-T-G-G--G-G-G---AT-AA-C--TA--C-T-C-G-A-A-A-----…
>H97X84I02IWWWZ
A-T-T-G-A--A-C-G-C--T-G-G-C-G-G--C-A-T-G--C---C-T--TA-C--AC-A-T-G--C-A-A-G--T-C--GA-A-CG-----------G-TAA--C-G--G--------------------------------------G-TCC------------------------TTCGG------------------------------G--A--T---------------------------G-C-C----G--AC--G-------AG-T-G-G-C-GA-A--C--G-GG-T-G-A-G-T-A--AT-A-C-A-T-C-GG---A-A-C-GT-G-C-C-CGA--TC-G-T-G-G--G-G-G---AT-AA-C--GA--G-G-C-G-A-A-A-----…
>H97X84I02IWU45
A-T-T-G-A--A-C-G-C--T-G-G-C-G-G--C-A-T-G--C---C-T--TA-C--AC-A-T-G--C-A-A-G--T-C--GA-A-CG-----------G-TAA--C-A--G--------------------------------------G-T-C------------------------TTC-G------------------------------G--A--T---------------------------G-C-T----G--AT--G-------AG-T-G-G-C-GA-A--C--G-GG-T-G-A-G-T-A--AT-A-C-A-T-C-GG---A-A-C-GT-G-C-C-CGA--TC-G-T-G-G--G-G-G---AT-AA-C--GA--A-G-C-G-A-A-A-----…
>H97X84I02IWA43
A---C-G-A--A-C-G-C--T-G-G-C-G-G--C-G-T-G--C---C-T--AA-T--AC-A-T-G--C-A-A-G--T-C--GA-A-CG-----------G-TAA--C-A--G--------------------------------------G-T-C------------------------TTC-G------------------------------G--A--T---------------------------G-C-T----G--AC--G-------AG-T-G-G-C-GA-A--C--G-GG-T-G-A-G-T-A--AT-A-C-A-T-C-GG---A-A-C-GT-G-C-C-CGA--TC-G-T-G-G--G-G-G---AT-AA-C--GA--A-G-C-G-A-A-A-----…
>H97X84I02IV2AZ
G-AGC-G-A--A-C-G-C--T-G-G-C-G-G--C-A-G-G--C---C-T--AA-C--AC-A-T-G--C-A-A-G--C-C--GA-G-CG-G---------T-A----T-T--G------------------------------------T-T-T-C------------------------TTC-G------------------------------G--A--A-A---------------------------T-G----A--GA--G-------AG-C-G-G-C-GT-A--C--G-GG-T-G-C-G-G-A--AC-A-C-G-C-G-TG---CAA-C-CT-G-C-C-TTT--AT-C-T-G-G--G-G-G---AT-AG-C--CT--T-T-C-G-A-A-A-----…
>H97X84I02IR0EN
A-G-C-G-A--G-C-G-C--T-G-G-C-G-G--C-A-G-G--C---C-T--AA-C--AC-A-T-G--C-A-A-G--T-C--GA-A-CG-G---------A-C--------------------------------------------------C-T------------------------TTC-G------------------------------G--G------------------------------------------GT--C-------AG-C-G-G-C-GG-A--C--G-GG-T-G-A-G-T-A--AC-G-C-G-T-G-GG---A-A-C-GT-G-C-C-TTC--CG-G-T-T-C--G-G-A---AT-AA-C--CC--T-G-G-G-A-A-A-----…
>H97X84I02IQ29L
A-T-T-G-A--A-C-G-C--T-G-G-C-G-G--C-A-T-G--C---C-T--TA-C--AC-A-T-G--C-A-A-G--T-C--GA-A-CG-A---------G-A--------------------------------------------------C-C------------------------TTC-G------------------------------G--G------------------------------------------TC--T-------GG-T-G-G-C-GC-A--C--G-GG-T-G-C-G-T-A--AC-G-C-G-T-G-GG---A-A-T-CT-G-C-C-CTT--GG-G-T-T-C--G-G-A---AT-AA-C--TC--G-C-C-G-A-A-A-----…
>H97X84I02IPZAL
G-A-T-G-A--A-C-G-C--T-A-G-C-G-G--G-A-G-G--C---C-T--AA-C--AC-A-T-G--C-A-A-G--C-C--GA-G-CG-G---------T-A----T-T--G------------------------------------T-T-T-C------------------------TTC-G------------------------------G--A--A-A---------------------------T-G----A--GA--G-------AG-C-G-G-C-GT-A--C--G-GG-T-G-C-G-G-A--AC-A-C-G-T-G-TG---CAA-C-CT-G-C-C-TTT--AT-T-T-G-G--G-G-G---AT-AG-C--CT--T-T-C-G-A-A-A-----…
>H97X84I02IOER8
A---T-G-A--A-C-G-C--T-G-G-C-G-G--C-A-T-G--C---C-T--TA-C--AC-A-T-G--C-A-A-G--T-C--GA-A-CG-----------G-TAA--C-A--G--------------------------------------G-T-C------------------------TTC-G------------------------------G--A--T---------------------------G-C-T----G--AC--G-------AG-T-G-G-C-GA-A--C--G-GG-T-G-A-G-T-A--AT-A-C-A-T-C-GG---A-A-C-GT-G-C-C-CGA--TC-G-T-G-G--G-G-G---AT-AA-C--GA--A-G-C-G-A-A-A-----…
>H97X84I02INKEC
G-A-T-G-A--A-C-G-C--T-G-G-C-G-G--C-G-T-G--C---T-T--AA-C--AC-A-T-G--C-A-A-G--T-C--GA-A-CG-A---------G-A--------------------------------------------------C-C------------------------TTC-G------------------------------G--G------------------------------------------TC--T-------AG-T-G-G-C-GC-A--C--G-GG-T-G-C-G-T-A--AC-G-C-G-T-G-GG---A-A-T-CT-G-C-C-CTT--GG-G-T-T-C--G-G-A---AT-AA-C--TC--G-C-C-G-A-A-A-----…
>H97X84I02INHZ5
A-A-C-G-A--A-C-G-C--T-G-G-C-G-G--C-A-T-G--C---C-T--TA-C--AC-A-T-G--C-A-A-G--T-C--GA-A-CG-----------G-TAA--C-A--G--------------------------------------G-T-C------------------------TTC-G------------------------------G--A--T---------------------------G-C-T----G--AC--G-------AG-T-G-G-C-GA-A--C--G-GG-T-G-A-G-T-A--AT-A-C-A-T-C-GG---A-A-C-GT-G-C-C-CGA--TC-G-C-G-G--G-G-G---AT-AA-C--GA--G-G-C-G-A-A-A-----…
>H97X84I02INCUY
G-A-T-G-A--A-C-G-C--T-G-G-C-G-G--C-G-T-G--C---C-T--AA-T--AC-A-T-G--C-A-A-G--T-C--GA-G-CG-----------AACAG--ACGA-G--------------------------------G-A---G-C-T------------------------TGC-T------------------------------C--C--T---C-T-----------------------G-A----C--GT--T-------AG-C-G-G-C-GA-A--T--G-GG-T-G-A-G-T-A--AC-A-C-G-T-G-GG---CAA-C-CT-G-C-C-CTG--TA-G-T-T-G--G-G-G---AT-AA-C--TC--C-G-G-G-A-A-A-----…
>H97X84I02INCAQ
A-T-T-G-A--A-C-G-C--T-G-G-C-G-G--C-A-T-G--C---C-T--TA-C--AC-A-T-G--C-A-A-G--T-C--GA-A-CG-----------G-TAA--C-A--G--------------------------------------G----------------------------TT------------------------------------A--A---------------------------G-C-T----G--AC--G-------AG-T-G-G-C-GA-A--C--G-GG-T-G-A-G-T-A--AT-A-T-A-T-C-GG---A-A-C-GT---A-C-CTT--TCAG-T-G-G--G-G-G---AT-GA-C--GT--A-G-C-G-A-A-A-----…
>H97X84I02IMP68
A-A-C-G-A--A-C-G-C--T-G-G-C-G-G--C-A-T-G--C---C-T--AA-C--AC-A-T-G--C-A-A-G--T-C--GA-A-CG-----------G-TAA--C-A--G--------------------------------------G-T-C------------------------TTC-G------------------------------G--A--T---------------------------G-C-T----G--AC--G-------AG-T-G-G-C-GA-A--C--G-GG-T-G-A-G-T-A--AT-A-C-A-T-C-GG---A-A-C-GT-G-C-CCAGA---C-G-T-G-G--G-G-G---AT-AA-C--GA--G-G-C-G-A-A-A-----…
>H97X84I02IML0F
G-A-C-G-A--A-C-G-C--T-G-G-C-G-G--G-A-G-G--C---C-T--AA-C--AC-A-T-G--C-A-A-G--C-C--GA-G-CG-G---------T-A----T-T--G------------------------------------T-T-T-C------------------------TTC-G------------------------------G--A--A-A---------------------------T-G----A--GA--G-------GG-C-G-G-C-GT-A--C--G-GG-T-G-C-G-G-A--AC-A-C-G-T-G-TG---CAA-C-CT-G-C-C-TTT--AT-C-T-G-G--G-G-G---AT-AG-C--CT--T-T-C-G-A-A-A-----…
>H97X84I02IL2PH
A-T-T-G-A--A-C-G-C--T-G-G-C-G-G--A-A-T-G--C---T-T--TA-C--AC-A-T-G--C-A-A-G--T-C--GA-G-CG-----------G-CAG--C-G--C--------------------------------------G-G-G------------------------GCA-A------------------------------C--C--T---------------------------G-G-C----G--AC--G-------AG-C-G-G-C-GA-A--C--G-GG-T-G-A-G-T-A--AT-A-C-A-T-C-GG---A-A-C-GT-G-C-C-CAG--AC-G-T-G-G--G-G-G---AT-AA-C--TA--C-T-C-G-A-A-A-----…
>H97X84I02IKXSJ
A-T-T-G-A--A-C-G-C--T-G-G-C-G-G--C-A-T-G--C---C-T--TA-C--AC-A-T-G--C-A-A-G--T-C--GA-A-CG-----------G-TAA--C-A--G--------------------------------------G-T-CT-----------------------TTC-G----------------G-------------G--A--T---------------------------G-C-T----G--AC--G-------AG-T-G-G-C-GA-A--C--G-GG-T-G-A-G-T-A--AT-A-C-A-T-C-GG---A-A-C-GT-G-T-C-TAG--TA-G-T-G-G--G-G-G---AT-AA-C--TA--C-T-C-G-A-A-A-----…
>H97X84I02IK7B9
A-T-T-G-A--A-C-G-C--T-G-G-C-G-G--C-A-T-G--C---C-T--TA-C--AC-A-T-G--C-A-A-G--T-C--GA-A-CG-----------G-TAA--C-A--G--------------------------------------G-T-C------------------------TTC-G------------------------------G--A--T---------------------------G-C-T----G--AC--G-------AA-T-G-G-C-GA-A--C--G-GG-T-G-A-G-T-A--AT-A-C-A-T-C-GG---A-A-C-GT-G-C-C-CAG--TC-G-T-G-G--G-G-G---AT-AA-C--GA--G-G-C-G-A-A-A-----…
>H97X84I02IJSB1
G-A-C-G-A--A-C-G-C--T-G-G-C-G-G--T-G-T-G--C---T-T--CA-C--AC-A-T-G--C-A-A-G--T-C--GA-A-CG-A---------G-A--------------------------------------------------T-C------------------------TTC-G------------------------------G--A------------------------------------------TC--T-------AG-T-G-G-C-GC-A--C--G-GG-T-G-C-G-T-A--AC-G-C-G-T-G-GG---A-A-T-CT-G-C-C-CTT--GG-G-T-T-C--G-G-A---AT-AA-C--GT--C-G-G-G-A-A-A-----…
>H97X84I02IJNDJ
A-A-C-G-A--A-C-G-C--T-G-G-C-G-G--C-A-T-G--C---C-T--AA-C--AC-A-T-G--C-A-A-G--T-C--GA-A-CG-A---------A-G--------------------------------------------------G-C------------------------TTC-G------------------------------G--C------------------------------------------CT--T-------AG-T-G-G-C-GC-A--C--G-GG-T-G-C-G-T-A--AC-G-C-G-T-G-GG---A-A-T-CT-G-C-C-CTT--GG-G-T-T-C--G-G-A---AT-AA-C--AG--T-G-A-G-A-A-A-----…
>H97X84I02IJ5I1
A-A-C-G-A--A-C-G-C--T-A-G-C-G-G--G-A-G-G--C---C-T--AA-C--AC-A-T-G--C-A-A-G--C-C--GA-G-CG-G---------T-A----T-T--G------------------------------------T-T-T-C------------------------TTC-G------------------------------G--A--A-A---------------------------T-G----A--GA--G-------AG-C-G-G-C-GT-G--C--G-GG-T-G-C-G-G-A--AC-A-C-G-T-G-TG---CAA-C-CT-G-C-C-TTT--AT-C-T-G-G--G-G-G---AT-AG-C--CT--T-T-C-G-A-A-A-----…
>H97X84I02IHR9J
A---T-G-A--A-C-G-C--T-A-G-C-G-G--G-A-G-G--C---C-T--AA-C--AC-A-T-G--C-A-A-G--T-C--GA-A-CG-----------A-TGA--A-A--C----------------------------------T-C-T-A-G------------------------CTT-G------------------------------C--T--A-G-A-------------------------G-AA---G--AT--T-------AG-T-G-G-C-GG-A--C--G-GG-T-G-A-G-T-A--AC-A-T-T-T-A-GG---A-A-T-CT-G-C-C-TAG--TA-G-T-G-G--G-G-G---AT-AG-C--TC--G-G-G-G-A-A-A-----…
>H97X84I02IHE5E
A---C-G-A--A-C-G-C--T-G-G-C-G-G--C-G-T-G--C---C-T--AA-T--AC-A-T-G--C-A-A-G--T-C--GA-G-CG-G---------A-C--------------------------------------------------C-T------------------------TTC-G------------------------------G--G------------------------------------------GT--C-------AG-C-G-G-C-GG-A--C--G-GG-T-G-A-G-T-G--AC-G-C-G-T-G-GG---A-A-C-GT-G-C-C-TTC--CG-G-T-T-C--G-G-A---AT-AA-C--CC--T-G-G-G-A-A-A-----…
>H97X84I02I5TIV
T---T-G-A--A-C-G-C--T-G-G-C-G-G--C-A-T-G--C---C-T--TA-C--AC-A-T-G--C-A-A-G--T-C--GA-A-CG-----------G-TAA--C-A--G--------------------------------------G-T-C------------------------TTC-G------------------------------G--A--T---------------------------G-C-T----G--AC--G-------AG-T-G-G-C-GA-A--C--G-GG-T-G-A-G-T-A--AT-A-C-A-T-C-GG---A-A-C-GT-G-C-C-CGA--TC-G-T-G-G--G-G-G---AT-AA-C--GA--G-G-C-G-A-A-A-----…
>H97X84I02IC1RI
A-T-T-G-A--A-C-G-C--T-G-G-C-G-G--C-A-T-G--C---C-T--TA-C--AC-A-T-G--C-A-A-G--T-C--GA-A-CG-----------G-TAA--C-G--G--------------------------------------G-T-C------------------------TTC-G------------------------------G--A--T---------------------------G-C-T----G--AC--G-------AG-T-G-G-C-GA-A--C--G-GG-T-G-A-G-T-A--AT-A-C-A-T-C-GG---A-A-C-GT-G-C-C-CAG--AC-G-T-G-G--G-G-G---AT-AA-C--GA--G-G-C-G-A-A-A-----…
>H97X84I02I7M5C
A-T-T-G-A--A-C-G-C--T-G-G-C-G-G--C-A-T-G--C---C-T--TA-C--AC-A-T-G--C-A-A-G--T-C--GA-A-CG-----------G-TAA--C----A------------------------------------G-G-T-C------------------------TTC-G------------------------------G-----A-T-------------------------G-C-T----G--AC--G-------AG-T-G-G-C-GA-A--C--G-GG-T-G-A-G-T-A--AT-A-C-A-T-C-GG---A-A-C-GT-A-C-C-TTT--CA-G-T-G-G--G-G-G---AT-AA-C--GT--A-G-C-G-A-A-A-----…
>H97X84I02IAEL2
A-T-T-G-A--A-C-G-C--T-G-G-C-G-G--C-A-T-G--C---C-T--TA-C--AC-A-T-G--C-A-A-G--T-C--GA-G-CG-G---------G-C------------------------------------------------A-C-C------------------------TTC-G------------------------------G--G--T---------------------------------------GT--C-------AG-C-G-G-C-AG-A--C--G-GG-T-G-A-G-T-A--AC-A-C-G-T-G-GG---A-A-C-GT-G-C-C-CTT--CG-G-T-T-C--G-G-A---AT-AA-C--TC--A-G-G-G-A-A-A-----…
>H97X84I02I8Z17
A-T-T-G-A--A-C-G-C--T-G-G-C-G-G--C-A-G-G--C---T-T--AA-C--AC-A-T-G--C-A-A-G--T-C--GA-G-CG-G---------A-G----A-C--G----------------------------------A-G-G-T-G------------------------CTT-G------------------------------C--A--C-C-T-------------------------T-A----T--CT--T-------AG-C-G-G-C-GG-A--C--G-GG-T-G-A-G-T-A--AT-G-C-T-T-A-GG---A-A-T-CT-G-C-C-TAT--TA-G-T-G-G--G-G-G---AC-AA-C--AT--T-C-C-G-A-A-A-----…
>H97X84I02I854H
A-G-C-G-A--A-C-G-C--T-G-G-C-G-G--C-A-T-G--C---C-T--AA-C--GC-A-T-G--C-A-A-G--T-C--GA-A-CG-A---------G-A--------------------------------------------------T-C------------------------TTC-G------------------------------G--A------------------------------------------TC--T-------AG-T-G-G-C-GC-A--C--G-GG-T-G-C-G-T-A--AC-G-C-G-T-G-GG---A-A-T-CT-G-C-C-CTT--GG-G-T-T-C--G-G-A---AT-AA-C--TC--G-C-C-G-A-A-A-----…
>H97X84I02I7CZ2
G-A-T-G-T--A-C-G-C--C-A-G-C-G-G--G-A-G-G--C---C-T--AA-C--AC-A-T-G--C-A-A-G--C-C--GA-G-CG-G---------T-A----T-T--G------------------------------------T-T-T-C------------------------TTC-G------------------------------G--A--A-A---------------------------T-G----A--GA--G-------AG-C-G-G-C-GT-A--C--G-GG-T-G-C-G-G-A--AC-A-C-G-T-G-TG---CAA-C-CT-G-C-C-TTT--AT-C-T-G-G--G-G-G---AT-AG-C--CT--T-T-C-G-A-A-A-----…
>H97X84I02GFWUE
A-T-T-G-A--A-C-G-C--T-G-G-C-G-G--C-A-T-G--C---C-T--TA-C--AC-A-T-G--C-A-A-G--T-C--GA-A-CG-----------G-CAG--C-AC-G--------------------------------------G-A-C------------------------TTC-G------------------------------GT-C--T---------------------------G-G-T----G--GC--G-------AG-T-G-G-C-GA-A--C--G-GG-T-G-A-G-T-A--AT-G-T-A-T-C-GG---A-A-C-GT---A-C-CTT--TCAG-T-G-G--G-G-G---AT-AA-C--GA--A-G-C-G-A-A-A-----…
>H97X84I02I1CR8
A-G-C-G-A--A-C-G-C--T-G-G-C-G-G--C-A-G-G--C---C-T--AA-C--AC-A-T-G--C-A-A-G--T-C--GG-A-CG-A---------G-A--------------------------------------------------C-C------------------------TTC-G------------------------------G--G------------------------------------------TC--T-------AG-T-G-G-C-GC-A--C--G-GG-T-G-C-G-T-A--AC-G-C-G-T-G-GG---A-A-T-CT-G-C-C-CTT--GG-G-T-T-C--G-G-A---AT-AA-C--TC--G-C-C-G-A-A-A-----…
>H97X84I02HWJXI
A-T-T-G-A--A-C-G-C--T-G-G-C-G-G--C-A-G-G--C---T-T--AA-C--AC-A-T-G--C-A-A-G--T-C--GA-G-CG-G---------A-G----A-T--G----------------------------------A-G-G-T-G------------------------CTT-G------------------------------C--A--C-C-T-------------------------T-A----T--CT--T-------AG-C-G-G-C-GG-A--C--G-GG-T-G-A-G-T-A--AT-G-C-T-T-A-GG---A-A-T-CT-G-C-C-TAT--TA-G-T-G-G--G-G-G---AC-AA-C--AT--T-C-C-G-A-A-A-----…
>H97X84I02HWEJ8
G-A-T-G-A--A-C-G-C--T-A-G-C-G-G--G-A-G-G--C---C-T--AA-C--AC-A-T-G--C-A-A-G--C-C--GA-G-CG-G---------T-A------T--T------------------------------------G-T-TCC------------------------TTC-G------------------------------G--A--A-A---------------------------T-G----A--GA--G-------AG-C-G-G-C-GT-A--C--G-GG-T-G-C-G-G-A--AC-A-C-G-T-G-TG---CAA-C-CT-G-C-C-TTT--AT-C-T-G-G--G-G-G---AT-AG-C--CT--T-T-C-G-A-A-A-----…
>H97X84I02HR402
A-T-T-G-A--A-C-G-C--T-A-G-C-G-G--G-A-T-G--C---T-T--TA-C--AC-A-T-G--C-A-A-G--T-C--GA-A-CG-----------G-CAG--C-G--C----------------------------------GAGAAAGCTT-----------------------GCT-T------------------------------T--C--T-T-------------------------G-G-C----G--GC--G-------AG-T-G-G-C-GA-A--C--G-GG-T-G-A-G-T-A--AT-G-T-A-T-C-GG---A-A-C-GT-G-C-C-CAG--TA-G-C-G-G--G-G-G---AT-AA-C--TG--G-C-C-G-A-A-A-----…
>H97X84I02HQKJB
A-T-T-G-A--A-C-G-C--T-G-G-C-G-G--C-G-T-G--C---C-T--AA-C--AC-A-T-G--C-A-A-G--T-C--GA-A-CG-A---------G-A--------------------------------------------------C-C------------------------TTC-G------------------------------G--G------------------------------------------TC--T-------AG-T-G-G-C-GC-A--C--G-GG-T-G-C-G-T-A--AC-G-C-G-T-G-GG---A-A-T-CT-G-C-C-CTT--GG-G-T-T-C--G-G-A---AT-AA-C--TC--G-C-C-G-A-A-A-----…
>H97X84I02HQG3C
A-T-T-G-A--A-C-G-C--T-G-G-C-G-G--C-A-T-G--C---C-T--TA-C--AC-A-T-G--C-A-A-G--T-C--GA-A-CG-----------G-TAA--C-A--G--------------------------------------G-T-CT-----------------------TTCGG------------------------------G--A--T---------------------------G-C-T----G--AC--G-------AG-T-G-G-C-GA-A--C--G-GG-T-G-A-G-T-A--AT-A-C-A-T-C-GG---A-A-C-GT-G-C-C-CGA--TC-G-T-G-G--G-G-G---AT-AA-C--GA--A-G-C-G-A-A-A-----…
>H97X84I02HOOTJ
A-T-T-G-A--A-C-G-C--T-G-G-C-G-G--C-A-T-G--C---C-T--TA-C--AC-A-T-G--C-A-A-G--T-C--GA-A-CG-----------G-TAA--C-A--G--------------------------------------G-T-C------------------------TTC-G------------------------------G--A--T---------------------------G-C-T----G--AC--G-------AG-T-G-G-C-GA-A--C--G-GG-T-G-A-G-T-A--AT-A-C-A-T-C-GG---A-A-C-GT-G-C-C-CGA--TC-G-T-G-G--G-G-G---AT-AA-C--GG--G-G-C-G-A-A-A-----…
>H97X84I02HOBSO
A-A-C-G-A--A-C-G-C--T-G-G-C-G-G--C-A-T-G--C---C-T--TA-C--AC-A-T-G--C-A-A-G--T-C--GA-A-CG-----------G-TAA--C-A--G--------------------------------------G-T-C------------------------TTC-G------------------------------G--A--T---------------------------G-C-T----G--AC--G-------AG-T-G-G-C-GA-A--C--G-GG-T-G-A-G-T-A--AT-A-C-A-T-C-GG---A-A-C-GT-G-C-C-CGA--TC-G-T-G-G--G-G-G---AT-AA-C--TA--C-T-C-G-A-A-A-----…
>H97X84I02HOAX7
A-A-C-G-A--A-C-G-C--T-G-G-CGG-G--C-A-T-G--C---C-T--AA-C--AC-A-T-G--C-A-A-G--T-C--GA-A-CG-A---------G-A--------------------------------------------------C-C------------------------TTCGG------------------------------G--G-----------------------------------------TAC--T-------AG-T-G-G-C-GC-A--C--G-GG-T-G-C-G-T-A--AC-G-C-G-T-G-GG---A-A-T-CT-G-C-C-CTT--GG-G-T-T-C--G-G-A---AT-AA-C--TC--G-C-CGG-A-A-A-----…
>H97X84I02HMJY1
A---C-G-A--A-C-G-C--T-G-G-C-G-G--C-A-T-G--C---C-T--TA-C--AC-A-T-G--C-A-A-G--T-C--GA-A-CG-----------G-TAA--C-A--G--------------------------------------G-T-C------------------------TTC-G------------------------------G--A--T---------------------------G-C-T----G--AC--G-------AG-T-G-G-C-GA-A--C--G-GG-T-G-A-G-T-A--AT-A-C-A-T-T-GG---A-A-C-GT-G-C-C-CGA--TC-G-T-G-G--G-G-G---AT-AA-C--GA--G-G-C-G-A-A-A-----…
>H97X84I02HLB50
A-G-C-G-A--A-C-G-C--T-G-G-C-G-G--C-A-G-G--C---T-T--AA-C--AC-A-T-G--C-A-A-G--T-C--GA-A-CG-G---------G-C------------------------------------------------A---C------------------------TTC-G------------------------------G-----T---------------------------------------GC--T-------AG-T-G-G-C-AG-A--C--G-GG-T-G-A-G-T-A--GC-G-C-G-T-G-GG---A-A-C-GT-G-C-C-TTT--CG-G-T-T-C--G-G-A---AT-AA-T--CC--A-G-G-G-A-A-A-----…
>H97X84I02GPR1D
A-A-C-G-A--A-C-G-C--T-G-G-C-G-G--C-A-T-G--C---C-T--AA-C--AC-A-T-G--C-A-A-G--T-C--GA-A-CG-A---------A-G--------------------------------------------------G-C------------------------TTC-G------------------------------G--C------------------------------------------CT--T-------AG-T-G-G-C-GC-A--C--G-GG-T-G-C-G-T-A--AC-G-C-G-T-G-GG---A-A-T-CT-G-C-C-CTT--GG-G-T-T-C--G-G-A---AT-AA-C--TT--C-T-G-G-A-A-A-----…
>H97X84I02HJDA8
A-T-T-G-A--A-C-G-C--T-A-G-C-G-G--G-A-T-G--C---T-T--TA-C--AC-A-T-G--C-A-A-G--T-C--GA-A-CG-----------GCAGCG-CGA--GAA------------------------------------A-G-C-----------------------TTGCTTT-----------------------------C--T--T---------------------------G-G-C----G--GC--G-------AG-T-G-G-C-GA-A--C--G-GG-T-G-A-G-T-A--AT-G-T-A-T-C-GG---A-A-C-GT-G-C-C-CAG--TA-G-C-G-G--G-G-G---AT-AA-C--TG--G-C-C-G-A-A-A-----…
>H97X84I02HIUZM
A-G-C-G-A--A-C-G-C--T-G-G-C-G-G--C-A-G-G--C---T-T--AA-C--AC-A-T-G--C-A-A-G--T-C--GA-G-CG-G---------G-C------------------------------------------------ATC-C------------------------TTG-T------------------------------G--G--T---------------------------------------GT--C-------AG-C-G-G-C-AG-A--C--G-GG-T-G-A-G-T-A--AC-A-C-G-T-G-GG---A-A-C-GT-G-C-C-CTT--CG-G-T-T-C--G-G-A---AT-AA-C--TC--A-G-G-G-A-A-A-----…
>H97X84I02HIFSS
A-T-T-G-A--A-C-G-C--T-G-G-C-G-G--C-A-T-G--C---C-T--TA-C--AC-A-T-G--C-A-A-G--T-C--GA-A-CG-----------G-TAA--C-A--G--------------------------------------G-T-C------------------------TTC-G------------------------------G--A--T---------------------------G-C-T----G--AC--G-------AG-T-G-G-C-GA-A--C--G-GG-T-G-A-G-T-A--AT-A-C-A-T-C-GG---A-A-C-GT-G-C-C-CAG--AC-G-T-G-G--G-G-G---AT-AA-C--GA--G-G-C-G-A-A-A-----…
>H97X84I02HI671
A-T-T-G-A--A-C-G-C--T-G-G-C-G-G--C-A-T-G--C---C-T--TA-C--AC-A-T-G--C-A-A-G--T-C--GA-A-CG-----------GCAGCA-CGG--G----------------------------------------TGC------------------------TTGCA------------------------------C--C--T---------------------------G-G-T----G--GC--G-------AG-T-G-G-C-GA-A--C--G-GG-T-G-A-G-T-A--AT-G-C-A-T-C-GG---A-A-C-GT-G-C-C-CGA--TC-G-T-G-G--G-G-G---AT-AA-C--GA--G-G-C-G-A-A-A-----…
>H97X84I02HECFS
A-A-C-G-A--A-C-G-C--T-G-G-C-G-G--C-A-T-G--C---C-T--AA-C--AC-A-T-G--C-A-A-G--T-C--GA-A-CG-----------G-TAA--C-A--G--------------------------------------G-T-C------------------------TTT-G------------------------------G--A--T---------------------------G-C-T----G--AC--G-------AG-T-G-G-C-GA-A--C--G-GG-T-G-A-G-T-A--AT-A-C-A-T-C-GG---A-A-C-GT-G-C-C-CGA--TC-G-T-G-G--G-G-G---AT-AA-C--GA--G-G-C-G-A-A-A-----…
>H97X84I02HCZ6G
G-A-C-G-A--A-C-G-C--T-G-G-C-G-G--C-G-T-G--C---T-T--AA-C--AC-A-T-G--C-A-A-G--T-C--GA-A-C--G---------G------A-T--T----------------G--------------C--G-C-C-T-GC-----------------------TTT-T----------------G----------------T--G-G---G--TG---------------------T----G--GT--T-------AG-T-G-G-C-GA-A--C--G-GG-T-G-A-G-T-A--AC-A-C-G-T-G-AG---TAA-C-CT-G-C-C-CCC--TT-C-T-T-T--G-G-G---AT-AAGC--T---C-C-T-G-A-A-A-----…
>H97X84I02HCAHG
G-A-C-G-A--A-C-G-C--T-G-G-C-G-G--C-G-T-G--C---C-T--AA-T--AC-A-T-G--C-A-A-G--T-C--GA-G-CG-A---------A-C----C-A--A-------------------------------TA-A-G-A-A-G------------------------CTT-G------------------------------C--T--T-T-T-T--G--------------------T-T----G--GT--T-------AG-C-G-G-C-GG-A--C--G-GG-T-G-A-G-T-A--AC-A-C-G-T-G-GG---CAA-C-CT-G-C-C-TGT--AA-G-A-C-C--G-G-G---AT-AA-C--TC--C-G-G-G-A-A-A-----…
>H97X84I02HAYNX
A---C-G-A--A-C-G-C--T-G-G-C-G-G--C-A-G-G--C---T-T--AA-C--AC-A-T-G--C-A-A-G--T-C--GA-G-CG-G---------A-G----A-T--G----------------------------------A-G-G-T-G------------------------CTT-G------------------------------C--A--C-C-T-------------------------T-A----T--CT--T-------AG-C-G-G-C-GG-A--C--G-GG-C-G-A-G-T-A--AT-G-C-T-T-A-GG---A-A-T-CT-G-C-C-TAT--TA-G-T-G-G--G-G-G---AC-AA-C--AT--T-C-C-G-A-A-A-----…
>H97X84I02HAXML
A-T-T-G-A--A-C-G-C--T-G-G-C-G-G--C-A-T-G--C---C-T--TA-C--AC-A-T-G--C-A-A-G--T-C--GA-A-CG-----------G-TAA--C-A--G--------------------------------------G-T-C------------------------TTC-G------------------------------G--A--T---------------------------G-C-T----G--AC--G-------AG-T-G-G-C-GA-A--C--G-GG-T-G-A-G-T-A--AT-A-C-A-T-C-GG---A-A-C-GT-G-C-C-CGA--TC-G-T-G-G--G-G-G---AT-AA-C--GA--G-G-C-G-A-A-A-----…
>H97X84I02H98UV
A-T-T-G-A--A-C-G-C--T-G-G-C-G-G--C-A-T-G--C---C-T--TA-C--AC-A-T-G--C-A-A-G--T-C--GA-A-CG-----------G-TAA--C-A--G--------------------------------------G-T-C------------------------TTC-G------------------------------G--A--T---------------------------G-C-T----G--AC--G-------AG-T-G-G-C-GA-A--C--G-GG-T-G-A-G-T-A--TT-A-C-A-T-C-GG---G-A-C-GT-G-C-C-CGA--TC-G-T-G-G--G-G-G---AT-AA-C--GA--A-G-C-G-A-A-A-----…
>H97X84I02H866G
A-T-T-G-A--A-C-G-C--C-G-G-C-G-G--C-A-T-G--T---C-T--TA-C--AC-A-T-G--C-A-A-G--T-C--GA-A-CG-----------G-CAG--C-A--C------------------------------------G-G-A-C------------------------TTC-G------------------------------G--T--C-T-------------------------G-G-T----G--GC--G-------AG-T-G-G-C-GA-A--C--G-GG-T-G-A-G-T-A--AT-G-T-A-T-C-GG---A-A-C-GT-A-C-C-TTT--CA-G-T-G-G--G-G-G---AT-AA-C--GT--A-G-C-G-A-A-A-----…
>H97X84I02G4PM0
A---T-G-A--A-C-G-C--T-A-G-C-G-G--G-A-G-G--C---C-T--AA-C--AC-A-T-G--C-A-A-G--T-C--GA-A-CG-----------G-TAA--C-A--G--------------------------------------G-T-C------------------------TTC-G------------------------------G--A--T---------------------------G-C-T----G--AC--G-------AG-T-G-G-C-GA-A--C--G-GG-T-G-A-G-T-A--AT-A-C-A-T-C-GG---A-A-C-GT-G-C-C-CGA--TC-G-T-G-G--G-G-G---AT-AA-C--GA--A-G-C-G-A-A-A-----…
>H97X84I02F75OI
G-ATT-G-A--A-C-G-C--T-G-G-C-G-G--C-A-T-G--C---C-T--TA-C--AC-A-T-G--C-A-A-G--T-C--GA-A-CG-----------G-TA---A-C--A--------------------------------G-G---T-C--------------------------TTC-G------------------------------G--A--T---G-C-----------------------T------G--AC--G-------AG-T-G-G-C-GA-A--C--G-GG-T-G-A-G-T-A--AC-A-C-G-T-G-AG---TAA-C-CT-G-C-C-CTT--GA-C-T-T-T--G-G-G---AT-AA-C--TT--C-A-G-G-A-A-A-----…
>H97X84I02H3VT6
A-T-T-G-A--A-C-G-C--T-G-G-C-G-G--C-A-T-G--C---C-T--TA-C--AC-A-T-G--C-A-G-G--T-C--GA-A-CG-----------G-TAA--C-A--G--------------------------------------G-T-C------------------------TTT-G------------------------------G--A--T---------------------------G-C-T----G--AC--G-------AG-T-G-G-C-GA-A--C--G-GG-T-G-A-G-T-A--AT-A-C-A-T-C-GG---A-A-C-GT-G-C-C-CGA--TC-G-T-G-G--G-G-G---AT-AA-C--GA--A-G-C-G-A-A-A-----…
>H97X84I02H254K
A-T-T-G-A--A-C-G-C--T-G-G-C-G-G--C-A-G-G--C---T-T--AA-C--AC-A-T-G--C-A-A-G--T-C--GA-G-CG-G---------A-G----A-T--G----------------------------------A-G-G-T-G------------------------CTT-G------------------------------C--A--C-C-T-------------------------C-A----T--CT--T-------AG-C-G-G-C-GG-A--C--G-GG-T-G-A-G-T-A--AT-A-C-T-T-A-GG---A-A-T-CT-G-C-C-TAT--TA-G-T-G-G--G-G-G---AC-AA-C--AT--T-C-C-G-A-A-A-----…
>H97X84I02H0XSK
A-T-T-G-A--A-C-G-C--T-G-G-C-G-G--C-A-T-G--C---C-T--TA-C--AC-A-T-G--C-A-A-G--T-C--GA-A-CG-----------G-CAG--C-A--C------------------------------------G-G-A-C------------------------TTC-G------------------------------G--T--C-T-------------------------G-G-T----G--GC--G-------AG-T-G-G-C-GA-A--C--G-GG-T-G-A-G-T-A--AT-G-T-A-T-C-GG---A-A-C-GT-A-C-C-TTT--CA-G-T-G-G--G-G-G---AT-AA-C--GT--A-G-C-G-A-A-A-----…
>H97X84I02GZFPU
A-A-C-G-A--A-C-G-C--T-G-G-C-G-G--C-A-T-G--C---C-T--TA-C--AC-A-T-A--C-A-A-G--T-C--GA-A-CG-----------G-TAA--C-A--G--------------------------------------G-T-C------------------------TTC-G------------------------------G--A--T---------------------------G-C-T----G--AC--G-------AG-T-G-G-C-GA-A--C--G-GG-T-G-A-G-T-A--AT-A-C-A-T-C-GG---A-A-C-GT-G-C-C-CGA--TC-G-T-G-G--G-G-G---GT-AA-C--GA--A-G-C-G-A-A-A-----…
>H97X84I02GYGUM
A-T-T-G-A--A-C-G-C--T-G-G-T-G-G--C-A-T-G--C---C-T--TA-C--AC-A-T-G--C-A-A-G--T-C--GA-A-CG-----------G-TAA--C-A--G--------------------------------------G-T-C------------------------TTC-G------------------------------G--A--T---------------------------G-C-T----G--AC--G-------AG-C-G-G-C-GA-A--C--G-GG-T-G-A-G-T-A--AT-A-C-A-T-C-GG---A-A-C-GT-G-C-CCAGA---C-G-T-G-G--G-G-G---AT-AA-C--GA--A-G-C-G-A-A-A-----…
>H97X84I02GWV5O
A-T-T-G-A--A-C-G-C--T-G-G-C-G-G--C-A-T-G--C---C-T--TA-C--AC-A-T-G--C-A-A-G--T-C--GA-A-CG-----------G-TAA--C-A--G--------------------------------------G-T-C------------------------TTC-G------------------------------G--A--T---------------------------G-C-T----G--AC--G-------AG-T-G-G-C-GA-A--C--G-GG-T-G-A-G-T-A--AT-A-C-A-T-C-GG---A-A-C-GT-G-C-C-C-G-ATT-G-T-G-G--G-G-G---AT-AA-C--GA--G-G-C-G-A-A-A-----…
>H97X84I02GT3TV
A-T-T-G-A--A-C-G-C--T-G-G-C-G-G--C-A-T-G--C---C-T--TA-C--AC-A-T-G--C-A-A-G--T-C--GA-A-CG-----------G-TAA--C-A--G----------------------------------------G--------------------------TT--A---------------------------------A------------------------------G-C-T----G--AC--G-------AG-T-G-G-C-GA-A--C--G-GG-T-G-A-G-T-A--AT-A-T-A-T-C-GG---A-A-C-GT-G-C-C-CAG--TC-G-T-G-G--G-G-G---AT-AA-C--TG--C-T-C-G-A-A-A-----…
>H97X84I02GSKW5
A-T-T-G-A--A-C-G-C--T-G-G-C-G-G--C-A-T-G--C---C-T--TA-C--AC-A-T-G--C-A-A-G--T-C--GA-A-CG-----------G-TAA--C-A--G--------------------------------------G-T-C------------------------TTC-G------------------------------G--A--T---------------------------G-C-T----G--AC--G-------AG-T-G-G-C-GA-A--C--G-GG-T-G-A-G-T-A--AT-A-C-A-T-C-GG---A-A-C-GT-G-C-C-CGA--TC-G-T-G-G--G-G-G---AT-AA-C--G---A-G-C-G-A-A-A-----…
>H97X84I02GPU28
A---T-G-A--A-C-G-C--T-A-G-C-G-G--C-A-T-G--C---C-T--TA-C--AC-A-T-G--C-A-A-G--T-C--GA-A-CG-----------G-TAA--C-A--G--------------------------------------G-T-C------------------------TTC-G------------------------------G--A--T---------------------------G-C-T----G--AC--G-------AG-T-G-G-C-GA-A--C--G-GG-T-G-A-G-T-A--AT-A-C-A-T-C-GG---A-A-C-GT-G-C-C-CGA--TC-G-T-G-G--G-G-G---AT-AA-C--GA--A-G-C-G-A-A-A-----…
>H97X84I02GO9UF
A-A-C-G-A--A-C-G-C--T-G-G-C-G-G--C-A-T-G--C---C-T--AA-C--AC-A-T-G--C-A-A-G--T-C--GA-A-CG-A---------G-A--------------------------------------------------T-C------------------------TTC-G------------------------------G--A------------------------------------------TC--T-------AG-T-G-G-C-GC-A--C--G-GG-T-G-C-G-T-A--AC-G-C-G-T-G-GG---A-A-T-CT-G-T-C-CTT--GG-G-T-T-C--G-G-A---AT-AA-C--TT--C-T-G-G-A-A-A-----…
>H97X84I02GHHAQ
A-T-T-G-A--A-C-G-C--T-G-G-C-G-G--C-A-T-G--C---C-T--TA-C--AC-A-T-G--C-A-A-G--T-C--GA-A-CG-----------G-TAA--C----A------------------------------------G-G-T-C------------------------TTC-G------------------------------G-----A-T-------------------------G-C-T----G--AC--G-------AG-T-G-G-C-GA-A--C--G-GG-T-G-A-G-T-A--AT-A-C-A-T-C-GG---A-A-C-GT-G-C-C-CGA--TC-G-T-G-G--G-G-G---AT-AC-C--GA--G-G-C-G-A-A-A-----…
>H97X84I02GFVXL
A-A-C-G-A--A-C-G-C--T-G-G-C-G-G--C-A-T-G--C---C-T--AA-C--AC-A-T-G--C-A-A-G--T-C--GA-A-CG-A---------A-G--------------------------------------------------G-C------------------------TTC-G------------------------------G--C------------------------------------------CT--T-------AG-T-G-G-C-GC-A--C--G-GG-T-G-C-G-T-A--AC-G-C-G-T-G-GG---A-A-T-CT-G-C-C-CTT--GG-G-T-T-C--G-G-A---AT-AA-CT-TC--T-G-G-G-A-A-A-----…
>H97X84I02GE6G8
G-A-C-G-A--A-C-G-C--T-G-G-C-G-G--C-G-T-G--C---C-T--AA-T--AC-A-T-G--C-A-A-G--T-C--GA-A-CG-A---------A-CC---G-C--A-------------------------------AC-T-T-G-A-A------------------------CTT-G---------------------------------T--T-C-T-CG-T------------------T-A-A----G--GT--T-------AG-T-G-G-C-GC-A--C--G-GG-T-G-A-G-T-A--AC-A-C-G-T-G-GG---GAA-C-CT-G-C-C-CTT--TA-G-T-G-G--G-G-G---AT-AA-C--AG--T-C-G-G-A-A-A-----…
>H97X84I02GAEJD
A-T-T-G-A--A-C-G-C--T-G-G-C-G-G--C-A-T-G--C---C-T--TA-C--AC-A-T-G--C-A-A-G--T-C--GA-A-CG-----------G-TAA--C-A--G--------------------------------------G-T-C------------------------TTC-G------------------------------G--A--T---------------------------G-C-T----G--AC--G-------AG-T-G-G-C-GA-A--C--G-GG-T-G-A-G-T-A--GT-A-C-A-T-C-GG---A-A-C-GT-G-C-C-CGA--TC-G-T-G-G--G-G-G---AT-AA-C--GA--A-G-C-G-A-A-A-----…
>H97X84I02G9DN1
A-T-T-G-A--A-C-G-C--T-G-G-C-G-G--C-A-T-G--C---C-T--TA-C--AC-A-T-G--C-A-A-G--T-C--GA-A-CG-----------G-CAG--C-A--C----------------------------------G-G-G-T-G------------------------CTT-G------------------------------C--A--C-C-T-----------------------G-G-T----G--GC--G-------AG-T-G-G-C-GA-A--C--G-GG-T-G-A-G-T-A--AT-G-C-A-T-C-GG---A-A-C-GT-G-C-C-CAG--TC-G-T-G-G--G-G-G---AT-AA-C--GC--A-G-C-G-A-A-A-----…
>H97X84I02G8CNJ
A-G-C-G-A--A-C-G-C--T-G-G-C-G-G--C-A-G-G--C---T-T--AA-C--AC-A-T-G--C-A-A-G--T-C--GA-G-CG-G---------G-C------------------------------------------------A-C-C------------------------TTC-G------------------------------G--G--T---------------------------------------GT--C-------AG-C-G-G-C-AG-A--C--G-GG-T-G-A-G-T-A--AC-A-C-G-T-G-GG---A-A-C-GT-G-C-C-CTT--CG-G-T-T-C--G-G-A---AT-AA-C--CC--T-G-G-G-A-A-A-----…
>H97X84I02G7U4T
G-A-C-G-A--A-C-G-C--T-G-G-C-G-G--C-G-T-G--C---C-T--AA-T--AC-A-T-G--C-A-A-G--T-C--GA-A-CG-A---------A-CC---G-C--G------------------------------ACG-A-G---A-A------------------------CTT-G---------------------------------T--T-C-TGG--T------------------TCA-A----G--GT--T-------AG-T-G-G-C-GC-A--C--G-GG-T-G-A-G-T-A--AT-A-C-G-T-G-GG---GAA-C-CT-G-C-C-CTT--TA-G-T-G-G--G-G-G---AT-AA-C--AG--T-C-G-G-A-A-A-----…
>H97X84I02G61DN
A---T-G-A--A-C-G-C--T-A-G-C-G-G--G-A-T-G--C---T-T--TA-C--AC-A-T-G--C-A-A-G--T-C--GA-A-CG-----------G-CAG--C-G--C------------------------------------GAGAAAGC-----------------------TTGCT------------------------------T--T--CTT-------------------------G-G-C----G--GC--G-------AG-T-G-G-C-GA-A--C--G-GG-T-G-A-G-T-A--AT-G-T-A-T-C-GG---A-A-C-GT-A-C-C-TTT--CA-G-T-G-G--G-G-G---AT-AA-C--GT--A-G-C-G-A-A-A-----…
>H97X84I02G61BV
G-ATT-G-A--A-C-G-C--T-G-G-C-G-G--C-A-T-G--C---C-T--AA-T--AC-A-T-G--C-A-A-G--T-C--GA-G-CG-A---------A-C----A-G--A-------------------------------CG-A-G-G-A-G------------------------CTT-G------------------------------C--T--C-C-T-C--T--------------------G-A----C--GT--T-------AG-C-G-G-C-GA-A--T--A-GG-T-G-A-G-T-A--AC-A-C-G-T-G-GG---CAA-C-CT-G-C-C-CTG--TA-G-T-T-G--G-G-G---AT-AA-C--TC--C-G-G-G-A-A-A-----…
>H97X84I02G5FYV
A-T-T-G-A--A-C-G-C--T-G-G-C-G-G--C-A-T-G--C---C-T--AA-C--AC-A-T-G--C-A-A-G--T-C--GA-A-CG-A---------G-A--------------------------------------------------C-C------------------------TTC-G------------------------------G--A------------------------------------------TC--T-------AG-T-G-G-C-GC-A--C--G-GG-T-G-C-G-T-A--AC-G-C-G-T-G-GG---A-A-T-CT-G-C-C-CTT--GG-G-T-T-C--G-G-A---AT-AA-C--TT--C-T-G-G-A-A-A-----…
>H97X84I02G2M84
G-G-C-G-A--A-C-G-C--T-G-G-C-G-G--C-A-T-G--C---C-T--AA-C--AC-A-T-G--C-A-A-G--T-C--GA-A-CG-A---------G-A--------------------------------------------------C-C------------------------TTC-G------------------------------G--G------------------------------------------TC--T-------AG-T-G-G-C-GC-A--C--G-GG-T-G-C-G-T-A--AC-G-C-G-T-G-GG---A-A-T-CT-G-C-C-CTT--GG-G-T-T-C--G-G-A---AT-AA-C--TC--G-C-T-G-A-A-A-----…
>H97X84I02G0ZDF
A-A-C-G-A--A-C-G-C--T-G-G-C-G-G--C-A-T-G--C---C-T--AA-T--AC-A-T-G--C-A-A-G--T-C--GA-A-CG-A---------G-A--------------------------------------------------C-C------------------------TTC-G------------------------------G--G------------------------------------------TC--T-------AG-T-G-G-C-GC-A--C--G-GG-T-G-C-G-T-A--AC-G-C-G-T-G-GG---A-A-T-CT-G-C-C-CTT--GG-G-T-T-C--G-G-A---AT-AA-C--TT--C-T-G-G-A-A-A-----…
>H97X84I02FZXIW
A-T-T-G-A--A-C-G-C--T-G-G-C-G-G--C-A-G-G--C---T-T--AA-C--AC-A-T-G--C-A-A-G--T-C--GA-A-CG-----------G-TAA--C-A--G--------------------------------------G-T-C------------------------TTC-G------------------------------G--A--T---------------------------G-C-T----G--AC--G-------AG-T-G-G-C-GA-A--C--G-GG-T-G-A-G-T-A--AT-A-C-A-T-C-GG---A-A-C-GT-G-C-C-CGA--TC-G-T-G-G--G-G-G---AT-AA-C--GA--G-G-C-G-A-A-A-----…
>H97X84I02FZ6CU
G-A-C-G-A--A-C-G-C--T-G-G-C-G-G--C-G-T-G--C---C-T--AA-T--AC-A-T-G--C-A-A-G--T-C--GA-G-CG-A---------A-C----C-A--A-------------------------------TA-A-G-A-A-G------------------------CTT-G------------------------------C--T--T-T-T-T--G--------------------T-T----G--GT--T-------AG-C-G-G-C-GG-A--C--G-GG-T-G-A-G-T-A--AC-A-C-G-T-G-GG---CAA-C-CT-GCC-C-TGT---A-G-T-T-G--G-G-G---AT-AA-C--TC--C-G-G-G-A-A-A-----…
>H97X84I02GBWM8
A-T-T-G-A--A-C-G-C--T-G-G-C-G-G--C-A-T-G--C---C-T--TA-C--AC-A-T-G--C-A-A-G--T-C--GA-A-CG-----------G-TAA--C-G--G--------------------------------------G-TCC------------------------TTCGG------------------------------G--A--T---------------------------G-C-C----G--AC--G-------AG-T-G-G-C-GA-A--C--G-GG-T-G-A-G-T-A--AT-A-C-A-T-C-GG---A-A-C-GT-G-C-C-CAG--AC-G-T-G-G--G-G-G---AT-AA-C--GA--G-G-C-G-A-A-A-----…
>H97X84I02FUOFF
A-A-C-G-A--A-C-G-C--T-G-G-C-G-G--C-A-T-G--C---C-T--AA-C--AC-A-T-G--C-A-A-G--T-C--GA-A-CG-----------G-TAA--C-A--G--------------------------------------G-T-C------------------------TTC-G------------------------------G--A--T---------------------------G-C-T----G--AC--G-------AG-T-G-G-C-GA-A--C--G-GG-T-G-A-G-T-A--AT-A-C-A-T-C-GG---A-A-C-GT-G-C-C-C-G-ATC-G-T-G-G--G-G-G---AT-AA-C--GA--G-G-C-G-A-A-A-----…
>H97X84I02FUFQ0
G-G-C-G-A--A-C-G-C--T-G-G-C-G-G--C-A-G-G--C---T-T--AA-C--AC-A-T-G--C-A-A-G--C-C--GA-G-CG-G---------T-A----T-T--G------------------------------------T-T-T-C------------------------TTC-G------------------------------G--A--A-A---------------------------T-G----A--GA--G-------AG-C-G-G-C-GT-A--C--G-GG-T-G-C-G-G-A--AC-A-C-G-T-G-TG---CAA-C-CT-G-C-C-TTT--AT-C-T-G-G--G-G-G---AT-AG-C--CT--T-T-C-G-A-A-A-----…
>H97X84I02FU243
A-G-C-G-A--A-C-G-C--T-G-G-C-G-G--C-A-G-G--C---C-T--AA-C--AC-A-T-G--C-A-A-G--T-C--GA-A-CG-----------A-TGA--A-A--C----------------------------------T-C-T-A-G------------------------CTT-G------------------------------C--T--A-G-A-------------------------G-AT---G--AT--T-------AG-T-G-G-C-GG-A--C--G-GG-T-G-A-G-T-A--AC-A-T-T-T-A-GG---A-A-T-CT-G-C-C-TAG--TA-G-T-G-G--G-G-G---AT-AG-C--TC--G-G-G-G-A-A-A-----…
>H97X84I02FU0KZ
A-T-T-G-A--A-C-G-C--T-G-G-C-G-G--C-A-T-G--C---C-T--AA-C--AC-A-T-G--C-A-A-G--T-C--GA-A-CG-A---------G-A--------------------------------------------------C-C------------------------TTC-G------------------------------G--G------------------------------------------TC--T-------AG-T-G-G-C-GC-A--C--G-GG-T-G-C-G-T-A--AC-G-C-G-T-G-GG---A-A-C-GT-G-C-C-CTT--CG-G-T-T-C--G-G-A---AT-AA-C--TC--A-G-G-G-A-A-A-----…
>H97X84I02FSUL3
A-T-T-G-A--A-C-G-C--T-G-G-C-G-G--C-A-T-G--C---C-T--TA-C--AC-A-T-G--T-A-A-G--T-C--GA-A-CG-----------G-TAA--C-A--G--------------------------------------G-T-C------------------------TTT-G------------------------------G--A--T---------------------------G-C-T----G--AC--G-------AG-T-G-G-C-GA-A--C--G-GG-T-G-A-G-T-A--AT-A-C-A-T-C-GG---A-A-C-GT-G-C-C-CGA--TC-G-T-G-G--G-G-G---AT-AA-C--GA--G-G-C-G-A-A-A-----…
>H97X84I02FOXEE
G-A-T-G-A--A-C-G-C--T-A-G-C-G-G--G-A-G-G--C---C-T--AA-C--AC-A-T-G--C-A-A-G--C-C--GA-G-CG-G---------T-A----T-T--G------------------------------------T-T-T-C------------------------CTC-G------------------------------G--A--A-A---------------------------T-G----A--GA--G-------AG-C-G-G-C-GT-A--T--G-GG-T-G-C-G-G-A--AC-A-C-G-T-G-TG---CAA-C-CT-G-C-C-TTT--AT-C-T-G-G--G-G-G---AT-AG-C--CT--T-T-C-G-A-A-A-----…
>H97X84I02FN9D3
G-ATT-G-A--A-C-G-C--T-G-G-C-G-G--C-A-G-G--C---T-T--AA-C--AC-A-T-G--C-A-A-G--C-C--GA-G-CG-G---------T-A----T-T--G------------------------------------T-T-T-C------------------------TTC-G------------------------------G--A--A-A---------------------------T-G----A--GA--G-------AG-C-G-G-C-GT-A--C--G-GG-T-G-C-G-G-A--AC-A-C-G-T-G-TG---CAA-C-CT-G-C-C-TTT--AT-C-T-G-G--G-G-G---AT-AG-C--CT--T-T-C-G-A-A-A-----…
>H97X84I02FMDJ1
A-T-T-G-A--A-C-G-C--T-G-G-C-G-G--C-A-G-G--C---T-T--AA-C--AC-A-T-G--C-A-A-G--T-C--GA-A-CG-----------A-TGA--C-T--C----------------------------------T-C-T-A-G------------------------CTT-G------------------------------C--T--A-G-A-------------------------G-AA---G--AT--T-------AG-T-G-G-C-GG-A--C--G-GG-T-G-A-G-T-A--TC-A-T-T-T-A-GG---A-A-T-CT-G-C-C-TAG--TA-G-T-G-G--G-G-G---AT-AG-C--TC--G-G-G-G-A-A-A-----…
>H97X84I02FKG3R
G-A-C-G-A--A-C-G-C--T-G-G-C-G-G--C-G-T-G--C---C-T--AA-T--AC-A-T-G--C-A-A-G--C-C--GA-G-CG-G---------T-A----T-T--G------------------------------------T-T-T-C------------------------TTC-G------------------------------G--A--A-A---------------------------T-G----A--GA--G-------AG-C-G-G-C-GT-A--C--G-GG-T-G-C-G-G-A--AC-A-C-G-T-G-TG---CAA-C-CT-G-C-C-TTT--AT-C-T-G-G--G-G-G---AT-AG-C--CT--T-T-C-G-A-A-A-----…
>H97X84I02FH9XF
A-T-T-G-A--A-C-G-C--T-G-G-C-G-G--C-A-T-G--C---C-T--TA-C--AC-A-T-G--C-A-A-G--T-C--GA-A-CG-G---------A-C--------------------------------------------------C-C------------------------TTC-G------------------------------G--G------------------------------------------GT--T-------AG-T-G-G-C-GG-A--C--G-GG-T-G-A-G-T-A--AC-A-C-G-T-G-GG---A-A-C-GT-G-C-C-TTT--AG-G-T-T-C--G-G-A---AT-AG-C--TC--C-T-G-G-A-A-A-----…
>H97X84I02F6R4U
G-A-C-G-A--A-C-G-C--T-G-G-C-G-G--C-A-A-G--C---C-T--AA-C--AC-A-T-G--C-A-A-G--T-C--GA-A-CG-A---------G-A--------------------------------------------------C-C------------------------TTC-G------------------------------G--G------------------------------------------TC--T-------AG-T-G-G-C-GC-A--C--G-GG-T-G-C-G-T-A--AC-G-C-G-T-G-GG---A-A-T-CT-G-C-C-CTT--GG-G-T-T-C--G-G-A---AT-AA-CG-TC--G---G-G-A-A-A-----…
>H97X84I02F5WTV
A-T-T-G-A--A-C-G-C--T-A-G-C-G-G--G-A-T-G--C---T-T--TA-C--AC-A-T-G--C-A-A-G--T-C--GA-A-CG-----------GCAGCG-CGAG-GAA--------------------------------------G-C-----------------------TTGCTTT-----------------------------C--T--T---------------------------G-G-C----G--GC--G-------AG-T-G-G-C-GA-A--C--G-GG-T-G-A-G-T-A--AT-G-T-A-T-C-GG---A-A-C-GT-G-C-C-CAG--TA-G-C-G-G--G-G-G---AT-AA-C--TG--G-C-C-G-A-A-A-----…
>H97X84I02F3SIS
G-A-C-G-A--A-C-G-C--T-G-G-C-G-G--C-G-T-G--C---C-T--AA-T--AC-A-T-G--C-A-A-G--T-C--GA-A-CG-A---------A-CC---G-C--G------------------------------ACG-A-G---A-A------------------------CTT-G---------------------------------T--T-C-T-CG-T------------------T-A-A----G--GT--T-------AG-T-G-G-C-GC-A--C--G-GG-T-G-A-G-T-A--AC-A-C-G-T-G-GG---GAA-C-CT-G-C-C-CTT--TA-G-T-G-G--G-G-G---AT-AA-C--AG--T-C-G-G-A-A-A-----…
>H97X84I02G0INW
G-A-T-G-A--A-C-G-C--T-A-G-C-G-G--G-A-G-G--C---C-T--AA-C--AC-A-T-G--C-A-A-G--C-C--GA-G-CG-----------G-TAT--G-G--A------------------------------------T-A-G-C------------------------TT--G------------------------------C--T--A-T---------------------------C-C----A--GA--G-------AG-C-G-G-C-GT-A--C--G-GG-T-G-C-G-T-A--AC-A-C-G-T-G-TG---CAA-C-CT-A-C-C-TTT--AT-C-T-G-G--G-G-G---AT-AG-C--CT--T-T-C-G-A-A-A-----…
>H97X84I02G3EP7
A-T-T-G-A--A-C-G-C--T-G-G-C-G-G--C-A-T-G--C---C-T--TA-C--AC-A-T-G--C-A-A-G--T-C--GA-A-CG-----------G-CAG--C-A--T-------------------------------GA-T-C-T-A-G------------------------CTT-G------------------------------C--T--A-G-A-T--T------------------G-A-T----G--GC--G-------AG-T-G-G-C-GA-A--C--G-GG-T-G-A-G-T-A--AT-A-C-A-T-C-GG---A-A-C-GT-G-C-C-CTG--TA-G-T-G-G--G-G-G---AT-AA-C--TA--G-T-C-G-A-A-A-----…
>H97X84I02IIFIN
G-A-T-G-A--A-C-G-C--T-A-G-C-G-A--C-A-G-G--C---T-T--AA-C--AC-A-T-G--C-A-A-G--T-C--GA-G-GG-----------G-CAG--C----G----------------G--------------GG-T-T-G-T-AG-----------------------C--------------------A-------------A--T--A-C-A-A--CT-----------------G-C-C----G--GC--G-------AC-C-G-G-C-GC-A--C--G-GG-T-G-A-G-T-A--AC-A-C-G-T-A-TG---TAA-C-CT-G-C-C-CTC--TG-C-A-G-G--G-G-G---AT-AA-G--CG--G-A-A-G-A-A-A-----…
>H97X84I02JDWVE
G-A-C-G-A--A-C-G-C--T-G-G-C-G-G--C-A-T-G--C---C-T--AA-T--AC-A-T-G--C-A-A-G--T-C--GA-G-CG-A---------A-C----A-G--A-------------------------------CG-A-G-G-A-G------------------------CTT-G------------------------------C--T--C-C-T-C--T--------------------G-A----C--GT--T-------AG-C-G-G-C-GA-A--T--G-GG-T-G-A-G-T-A--AC-A-C-G-T-G-GG---CAA-C-CT-G-C-C-CTG--TA-G-T-T-G--G-G-G---AT-AA-C--TC--C-G-G-G-A-A-A-----…
>H97X84I02IWA0O
A-T-T-G-A--A-C-G-C--T-G-G-C-G-G--C-A-T-G--C---C-T--TA-C--AC-A-T-G--C-A-A-G--T-C--GA-A-CG-----------G-TAA--C-A----------------------------------G----G-T----------------------------CTT--------------------------------C-----G-G-A----T------------------G-C-T----G--AC--G-------AG-T-G-G-C-GA-A--C--G-GG-T-G-A-G-T-A--AT-A-C-A-T-C-GG---A-A-C-GT-G-C-C-CTG--TA-G-T-G-G--G-G-G---AT-AA-C--TA--G-T-C-G-A-A-A-----…
>H97X84I02JOUX3
A-T-T-G-A--A-C-G-C--T-G-G-C-G-G--C-A-G-G--C---C-T--AA-C--AC-A-T-G--C-A-A-G--T-C--GA-G-CG-----------G-AT---G-A--A----------------------------------G-G-G-A-G------------------------CTT-G------------------------------C--T--C-C-T-------------------------T-G----A--TT--T-------AG-C-G-G-C-GG-A--C--G-GG-T-G-A-G-T-A--AT-G-C-C-T-A-GG---A-A-T-CT-G-C-C-TGG--TA-G-T-G-G--G-G-G---AT-AA-C--GT--T-C-C-G-A-A-A-----…
>H97X84I02JKE6L
A-A-C-G-A--A-C-G-C--T-G-G-C-G-G--C-G-G-G--C---C-T--CA-T--AC-A-T-G--C-A-A-G--T-C--GA-G-CG-C---------G-AA---A-G--T------------------------------------C-C-G----------------------------C--------------------------------A--A--G-G---------------------------A-T--GAG--TA--A-------AG-C-G-G-C-GC-A--C--G-GG-T-G-A-G-T-A--AC-A-C-G-T-G-GA---TAA-T-CT-A-C-C-CTT--TG-G-A-T-T--G-G-A---AT-AA-C--CT--G-T-C-G-A-A-A-----…
>H97X84I02JTQDJ
G-A-C-G-A--A-C-G-C--T-G-G-C-G-G--C-G-T-G--C---C-T--AA-T--AC-A-T-G--C-A-A-G--T-C--GA-A-CG-C---------T-T----C-T--T-----------TCCT-C--------------CC-G-A-G-T-G------------------------CTT-G------------------------------C--A--C-T-C-A--ATT--GGA-------------A-A----G--AG--G-------AG-T-G-G-C-GG-A--C--G-GG-T-G-A-G-T-A--AC-A-C-G-T-G-GG---TAA-C-CT-A-C-C-CAT--CA-G-A-G-G--G-G-G---AT-AA-C--AC--T-T-G-G-A-A-A-----…
>H97X84I02JBLIB
G-A-C-G-A--A-C-G-C--T-G-G-C-G-G--C-G-C-G--C---C-T--AA-T--AC-A-T-G--C-A-A-G--T-C--GA-G-CG-A---------A-C----C-A--A-------------------------------TA-A-G-A-A-G------------------------CTT-G------------------------------C--T--T-T-T-T--G--------------------T-T----G--GT--T-------AG-C-G-G-C-GG-A--C--G-GG-T-G-A-G-T-A--AC-A-C-G-T-G-GG---TAA-C-CT-G-C-C-TGT--AA-G-A-T-C--G-G-G---AT-AA-C--TC--C-G-G-G-A-A-A-----…
>H97X84I02J291T
A-T-T-G-A--A-C-G-C--T-G-G-C-G-G--C-A-T-G--C---C-T--TA-C--AC-A-T-G--C-A-A-G--T-C--GA-A-CG-----------G-TAA--C-A--G--------------------------------------G-T-C------------------------TTC-G------------------------------G--A--T---------------------------G-C-T----G--AC--G-------AG-T-G-G-C-GA-A--C--G-GG-T-G-A-G-T-A--AT-A-C-A-T-C-GG---A-A-C-GT-G-C-C-CGA--TC-G-T-G-G--G-G-G---AT-AA-C--GA--A-G-C-G-A-A-A-----…
>H97X84I02IEHTR
A-G-C-G-A--A-C-G-C--T-G-G-C-G-G--C-A-G-G--C---T-T--AA-C--AC-A-T-G--C-A-A-G--T-C--GA-A-CG-G---------G-C------------------------------------------------A---C------------------------TTC-G------------------------------G-----T---------------------------------------GC--T-------AG-T-G-G-C-AG-A--C--G-GG-T-G-A-G-T-A--AC-G-C-G-T-G-GG---A-A-C-GT-G-C-C-TTT--CG-G-T-T-C--G-G-A---AT-AA-T--CC--A-G-G-G-A-A-A-----…
>H97X84I02HYDVC
G-A-T-G-A--A-C-G-C--T-G-G-C-G-G--C-G-T-G--C---T-T--AA-C--AC-A-T-G--C-A-A-G--T-C--GA-A-C--G---------A-G----A-A--C----------CATTGGA--------------TC-G-A-G-G-A------------------------TTC-G------------------------------T--C--C-A-A-G--TGA--A-GG------------T-GG---G--GA--A-------AG-T-G-G-C-GG-A--C--G-GG-T-G-A-G-T-A--AC-G-C-G-T-G-AG---CAA-T-CT-G-C-C-TTG--GA-G-T-G-G--G-G-A---AT-AA-C--GG--C-T-G-G-A-A-A-----…
>H97X84I02GDXGZ
G-A-T-G-A--A-C-G-C--T-G-G-C-G-G--C-G-T-G--C---T-T--AA-C--AC-A-T-G--C-A-A-G--T-C--GA-ACGGGA---------ATGC---C-A--C---------G------C--------------TG-A-TGCGA-T------------------------TTC-G------------------------------GTCAA-A-T-C-A--TG-------T-----------G-G----CA-TTC-G-------AG-T-G-G-C-GG-A--C--G-GG-T-G-A-G-T-A--AC-G-C-G-T-G-GG---TAA-C-CT-G-C-C-TTA--CA-C-A-G-G--G-G-G---AT-AA-C--AC--C-T-G-G-A-A-A-----…
>H97X84I02G5FP2
G-A-T-G-A--A-C-G-C--T-A-G-C-G-G--G-A-G-G--C---C-T--AA-C--AC-A-T-G--C-A-A-G--C-C--GA-G-CG-G---------T-A----T-G--GA-----------------------------------T-A-G-C------------------------TT--G------------------------------C--T--A-T---------------------------C-C----A--GA--G-------AG-C-G-G-C-GT-A--C--G-GG-T-G-C-G-T-A--AC-A-C-G-T-G-TG---CAA-C-CT-A-C-C-TTT--AT-C-T-G-G--G-G-G---AT-AG-C--CT--T-T-C-G-A-A-A-----…
>H97X84I02JVYFI
A-T-T-G-A--A-C-G-C--T-G-G-C-G-G--C-A-T-G--C---C-T--TA-C--AC-A-T-G--C-A-A-G--T-C--GA-A-CG-----------G-TA-----A--C------------------------------------A-G-G--------------------------TTA-A----------------------------------------------------------------G-C-T----G--AC--G-------AG-T-G-G-C-GA-A--C--G-GG-T-G-A-G-T-A--AT-A-T-A-T-C-GG---A-A-C-GT-G-C-C-CAG--TA-G-T-G-G--G-G-G---AT-AA-C--TG--C-T-C-G-A-A-A-----…
>H97X84I02JLTVF
A-T-T-G-A--A-C-G-C--T-G-G-C-G-G--C-A-T-G--C---C-T--TA-C--AC-A-T-G--C-A-A-G--T-C--GA-A-CG-----------G-TAA--C-A----------------------------------G----G-T----------------------------CTT--------------------------------C-----G-G-A-T--G------------------C---T----G--AC--G-------AG-T-G-G-C-GA-A--C--G-GG-T-G-A-G-T-A--AT-A-C-A-T-C-GG---A-A-C-GT-G-C-C-CGA--TC-G-T-G-G--G-G-G---AT-AA-C--GA--G-G-C-G-A-A-A-----…
>H97X84I02IG92D
G-A-T-G-A--A-C-G-C--T---G-C-G-G--C-A-T-G--C---C-T--AA-C--AC-A-T-G--C-A-A-G--T-C--GA-A-CG-A---------G-A--------------------------------------------------C-C------------------------TTC-G------------------------------G--G------------------------------------------TC--T-------AG-T-G-G-C-GC-A--C--G-GG-T-G-C-G-T-A--AC-G-C-G-T-G-GG---A-A-T-CT-G-C-C-CTT--GG-G-T-T-C--G-G-A---AT-AA-C--TC--G-C-C-G-A-A-A-----…
>H97X84I02GAP9Q
G-A-T-G-A--A-C-G-C--T-A-G-C-G-G--G-A-G-G--C---C-T--AA-C--AC-A-T-G--C-A-A-G--C-C--GA-G-CG-G---------T-A----T-T--G------------------------------------T-T-T-C------------------------TTC-G------------------------------G--A--A-A---------------------------T-G----A--GA--G-------AG-C-G-G-C-GT-A--C--G-GG-T-G-C-G-G-A--AC-A-C-G-T-G-TG---CAA-C-CT-G-C-C-TTT--AT-C-T-G-G--G-G-G---AT-AG-C--CT--T-T-C-G-A-A-A-----…
>H97X84I02H25AU
A-T-T-G-A--A-C-G-C--T-G-G-C-G-G--C-A-T-G--C---C-T--TA-C--AC-A-T-G--C-A-A-G--T-C--GA-A-CG-----------G-TAA--C-A--G--------------------------------------G-T-C------------------------TTC-G------------------------------G--A--T---------------------------G-C-T----G--AC--G-------AG-T-G-G-C-GA-A--C--G-GG-T-G-A-G-T-A--AT-A-C-A-T-C-GG---A-A-C-GT-G-C-C-CGA--TC-G-T-G-G--G-G-G---AT-AA-C--GA--G-G-C-G-A-A-A-----…
>H97X84I02FXLF3
G-A-T-G-A--A-C-G-C--T-G-G-C-G-G--C-G-T-G--C---T-T--AA-C--AC-A-T-G--C-A-A-G--T-C--GA-A-CG-G---------A-C------T--CA-----------------------------TAT-T-GAA-A-C------------------------CTA-G------------------------------T--G--A-T-T-T--A--------------------T------GA-GT--T-------AG-T-G-G-C-GG-A--C--G-GG-T-G-A-G-T-A--AC-G-C-G-T-G-GA---AAA-C-CT-G-C-C-GTA--TA-C-T-G-G--G-G-G---AT-AA-C--AC--T-T-A-G-A-A-A-----…
>H97X84I02IXB06
T---T-G-A--A-C-G-C--T-G-G-C-A-G--C-A-T-G--C---C-T--TA-C--AC-A-T-G--C-A-A-G--T-C--GA-A-CG-----------G-TAA--C-A--G--------------------------------------G-T-C------------------------TTC-G------------------------------G--A--T---------------------------G-C-T----G--AC--G-------AG-T-G-G-C-GA-A--C--G-GG-T-G-A-G-T-A--AT-A-C-A-T-C-GA---A-A-C-GT-G-C-C-CGA--TC-G-T-G-G--G-G-G---AT-AA-C--GA--G-G-C-G-A-A-A-----…
>H97X84I02HZ3KR
A-G-C-G-A--A-C-G-C--T-G-G-C-G-G--C-A-G-G--C---T-T--AA-C--AC-A-T-G--C-A-A-G--T-C--GA-A-CG-G---------G-C------------------------------------------------A---C------------------------TTC-G------------------------------G-----T---------------------------------------GC--T-------AG-T-G-G-C-AG-A--C--G-GG-T-G-A-G-T-A--AC-G-C-G-T-G-GG---A-A-C-GT-G-C-C-TTT--CG-G-T-T-C--G-G-A---AT-AA-T--CC--A-G-G-G-A-A-A-----…
>H97X84I02I2W50
G-A-C-G-A--A-C-G-C--T-G-G-C-G-G--C-A-T-G--C---C-T--AA-T--AC-A-T-G--C-A-A-G--T-C--GA-A-CG-A---------A-C----A-G--A-------------------------------CG-A-G-G-A-G------------------------CTT-G------------------------------C--TC-C-T-C-T--G----------------------A----C--GT--T-------AG-C-G-G-C-GA-A--T--G-GG-T-G-A-G-T-A--AC-A-C-G-T-G-GG---CAA-C-CT-GCC-C-TGT---A-G-T-T-G--G-G-G---AT-AA-C--TC--C-G-G-G-A-A-A-----…
>H97X84I02F2N54
T---T-G-A--A-C-G-C--T-G-G-C-G-G--C-A-T-G--C---C-T--TA-C--AC-A-T-G--C-A-A-G--T-C--GA-A-CG-----------G-TAA--C-A--G--------------------------------------G-T-C------------------------TTC-G------------------------------G--A--C---------------------------G-C-T----G--AC--G-------AG-T-G-G-C-GA-A--C--G-GG-T-G-A-G-T-A--AT-A-C-A-T-C-GG---A-A-C-GT-G-C-C-CGA--TC-G-T-G-G--G-G-G---AT-AA-C--GA--G-G-C-G-A-A-A-----…
>H97X84I02JSUAV
G-ATT-G-A--A-C-G-C--T-G-G-C-G-G--C-G-T-G--C---C-T--AA-T--AC-A-T-G--C-A-A-G--T-C--GA-G-CG-A---------A-C----C-A--A-------------------------------TA-A-G-A-A-G------------------------CTT-G------------------------------C--T--T-T-T-T--G--------------------T-T----G--GT--T-------AG-C-G-G-C-GG-A--C--G-GG-T-G-A-G-T-A--AC-A-C-G-T-G-GG---CAA-C-CT-G-C-C-TGT--AA-G-A-C-C--G-G-G---AT-AA-C--TC--C-G-G-G-A-A-A-----…
>H97X84I02F5SDK
A-T-T-G-A--A-C-G-C--T-G-G-C-G-G--C-A-T-G--C---C-T--TA-C--AC-A-T-G--C-A-A-G--T-C--GA-A-CG-----------G-TA-----A--C----------------------------------A-G-G-T--------------------------CTT--------------------------------C--G--G-A-T-----------------------G-C-T----G--AC--G-------AG-T-G-G-C-GA-A--C--G-GG-T-G-A-G-T-A--AT-A-C-A-T-C-GG---A-A-C-AT-G-T-C-CTG--TA-G-T-G-G--G-G-G---AT-AG-C--CC--G-G-C-G-A-A-A-----…
>H97X84I02IO4B5
G-A-C-G-G--A-C-G-C--T-G-G-C-G-G--C-A-T-G--C---C-T--TA-C--AC-A-T-G--C-A-A-G--T-C--GA-A-CG-A---------G-A--------------------------------------------------C-C------------------------TTC-G------------------------------G--G------------------------------------------TC--T-------AG-T-G-G-C-GC-A--C--G-GG-T-G-C-G-T-A--AC-G-C-G-T-G-GG---A-A-T-CT-G-C-C-CTT--GG-G-T-T-C--G-G-A---AT-AA-C--TC--G-C-C-G-A-A-A-----…
>H97X84I02IIDGE
A-T-T-G-A--A-C-G-C--T-G-G-C-G-G--C-A-G-G--C---C-T--AA-C--AC-A-T-G--C-A-A-G--T-C--GA-G-CG-----------G-AT---G-A--G----------------------------------A-G-G-A-G------------------------CTT-G------------------------------C--T--C-C-T-------------------------T-G----A--TT--T-------AG-C-G-G-C-GG-A--C--G-GG-T-G-A-G-T-A--AT-G-C-C-T-A-GG---A-A-T-TT-G-C-C-TGG--TA-G-T-G-G--G-G-G---AT-AA-C--GT--T-C-C-G-A-A-A-----…
>H97X84I02IAIYJ
A-A-C-G-A--A-C-G-C--T-G-G-C-G-G--C-A-T-G--C---C-T--AA-C--AC-A-T-G--C-A-A-G--T-C--GA-A-CG-----------G-TAA--C-A--G--------------------------------------G-T-C------------------------TTC-G------------------------------G--A--T---------------------------G-C-T----G--AC--G-------AG-T-G-G-C-GA-A--C--G-GG-T-G-A-G-T-A--AT-A-C-A-T-C-GG---A-A-C-GT-G-C-C-CGA--TC-G-T-G-G--G-G-G---AT-AA-C--GA--G-G-C-G-A-A-A-----…
>H97X84I02JLA9V
A-T-T-G-A--A-C-G-C--T-G-G-C-G-G--C-A-T-G--C---C-T--TA-C--AC-A-T-G--C-A-A-G--T-C--GA-A-CG-----------G-TAA--C-A--G--------------------------------------G----------------------------TT------------------------------------A--A---------------------------G-C-T----G--AC--G-------AG-T-G-G-C-GA-A--C--G-GG-T-G-A-G-T-A--AT-G-T-A-T-C-GG---A-A-C-GT-G-C-C-CGA--TC-G-T-G-G--G-G-G---AT-AA-C--GA--G-G-C-G-A-A-A-----…
>H97X84I02I909B
A-T-T-G-A--A-C-G-C--T-G-G-C-G-G--C-A-T-G--C---C-T--TA-C--AC-A-T-G--C-A-A-G--T-C--GA-A-CG-----------G-CAG--C-G--C--------------------------------------G-TCC------------------------TTCGG------------------------------G--A--T---------------------------G-G-C----G--GC--G-------AG-T-G-G-C-GA-A--C--G-GG-T-G-A-G-T-A--AT-A-C-A-T-C-GG---A-A-C-GT-G-C-CCGAG--A--G-T-G-G--G-G-G---AT-AA-C--GA--G-G-C-G-A-A-A-----…
>H97X84I02HNKRA
A-G-C-G-A--A-C-G-C--T-G-G-C-G-G--C-A-G-G--C---T-T--AA-C--AC-A-T-G--C-A-A-G--T-C--GA-A-CG-G---------G-C--------------------------------------------------A-C------------------------TTC-G------------------------------G--T------------------------------------------GC--T-------AG-T-G-G-C-AG-A--C--G-GG-T-G-A-G-T-A--AC-G-C-G-T-G-GG---A-A-C-GT-G-C-C-TTT--CG-G-T-T-C--G-G-A---AT-AA-C--TC--G-C-C-G-A-A-A-----…
>H97X84I02I899X
G-A-C-G-A--A-C-G-C--T-G-G-C-G-G--C-G-T-G--C---C-T--AA-T--AC-A-T-G--C-A-A-G--T-C--GA-G-CG-A---------G-C----C-A--A-------------------------------TA-A-G-A-A-G------------------------CTT-G------------------------------C--T--T-T-T-T--G--------------------T-T----G--GT--T-------AG-C-G-G-C-GG-A--C--G-GG-T-G-A-G-T-A--AC-A-C-G-T-G-GG---CAA-C-CT-G-C-C-TGT--AA-G-A-C-C--G-G-G---AT-AA-C--TC--C-G-G-G-A-A-A-----…
>H97X84I02I36RN
G-A-T-G-A--A-C-G-C--T-A-G-C-G-G--G-A-G-G--C---C-T--AA-C--AC-A-T-G--C-A-A-G--C-C--GA-G-CG-G---------T-A----T-T--G------------------------------------T-T-T-C------------------------TTC-G------------------------------G--A--A-A---------------------------T-G----A--GA--G-------AG-C-G-G-C-GT-A--C--G-GG-C-G-C-G-G-A--AC-A-C-G-T-G-TG---CAA-C-CT-G-C-C-TTT--AT-C-T-G-G--G-G-G---AT-AG-C--CT--T-T-C-G-A-A-A-----…
>H97X84I02GUXOY
A-T-T-G-A--A-C-G-C--T-G-G-C-G-G--C-A-T-G--C---C-T--TA-C--AC-C-T-G--C-A-A-G--T-C--GA-A-CG-----------G-CAG--C-A--T------------------------------------GATCT-A------------------------GC--T------------------------------T--G--C-TA----------------------GATTGAT----G--GC--G-------AG-T-G-G-C-GA-A--C--G-GG-T-G-A-G-T-A--AT-A-C-A-T-C-GG---A-A-C-GT-G-C-C-CAG--TA-G-T-G-G--G-G-G---AT-AA-C--TG--C-T-C-G-A-A-A-----…
>H97X84I02HZMXA
A-T-T-G-A--A-C-G-C--T-G-G-C-G-G--C-A-T-G--C---C-T--TA-C--AC-A-T-G--C-A-A-G--T-C--GA-A-CG-----------G-CAG--C-G--C--------------------------------------G-TCC------------------------TTCGG------------------------------G--A--T---------------------------G-G-C----G--GC--G-------AG-T-G-G-C-GA-A--C--G-GG-T-G-A-G-T-A--AT-A-C-A-T-C-GG---A-A-C-GT-G-C-C-CGA--GA-G-T-G-G--G-G-G---AT-AA-C--GA--G-G-C-G-A-A-A-----…
>H97X84I02HUGG0
A-T-T-G-A--A-C-G-C--T-A-G-C-G-G--G-A-T-G--C---T-T--TA-C--AC-A-T-G--C-A-A-G--T-C--GA-A-CG-----------GCAGCG-CGA--GAAA-------------------------------------GC-------------------------TTGCT---------------------------------T------------------------------T-CTTGGC-G--GC--G-------AG-T-G-G-C-GA-A--C--G-GG-T-G-A-G-T-A--AT-G-T-A-T-C-GG---A-A-C-GT-G-C-C-CAG--TC-G-T-G-G--G-G-G---AT-AA-C--TG--C-T-C-G-A-A-A-----…
>H97X84I02F0JSL
A-T-T-G-A--A-C-G-C--T-G-G-C-G-G--C-A-G-G--C---T-T--AA-C--AC-A-T-A--C-A-A-G--T-C--GA-G-CG-----------G-A----G-A--T----------------------------------GAG-G-T-G------------------------CTT-G------------------------------C--A--C-C-T---------------------------T----A-TCT--T-------AG-C-G-G-C-GG-A--C--G-GG-T-G-A-G-T-A--AT-G-C-T-T-A-GG---A-A-T-CT-G-C-C-TGG--TA-G-T-G-G--G-G-G---AT-AA-C--GT--C-C-G-G-A-A-A-----…
>H97X84I02H2PD0
A-T-T-G-A--A-C-G-C--T-G-G-C-G-G--C-A-T-G--C---C-T--TA-C--AC-A-T-G--C-A-A-G--T-C--GA-A-CG-----------G-CAG--C-AT-GATC-------------------------------------TAGC----------------------TTGCTA------------------------------G--AT-T---------------------------G-A-T----G--GC--G-------AG-T-G-G-C-GA-A--C--G-GG-T-G-A-G-T-A--AT-A-C-A-T-C-GG---A-A-C-GT-G-C-C-CGA--TC-G-T-G-G--G-G-G---AT-AA-C--GA--G-G-C-G-A-A-A-----…
>H97X84I02I1HA5
A-G-C-G-A--A-C-G-C--T-G-G-C-G-G--C-A-G-G--C---T-T--AA-C--AC-A-T-G--C-A-A-G--T-C--GA-A-CG-G---------G-C--------------------------------------------------A-C------------------------TTC-G------------------------------G--G------------------------------------------TC--T-------AG-T-G-G-C-GC-A--C--G-GG-T-G-C-G-T-A--AC-G-C-G-T-G-GG---A-A-T-CT-G-C-C-CTT--GG-G-T-T-C--G-G-A---AT-AA-C--TC--G-C-C-G-A-A-A-----…
>H97X84I02GKY9B
A-T-T-G-A--A-C-G-C--T-G-G-C-G-G--C-A-T-G--C---C-T--TA-C--AC-A-T-G--C-A-A-G--T-C--GA-A-CG-----------G-TAA--C-G--G--------------------------------------G-TCC------------------------TTCGG------------------------------G--A--T---------------------------G-C-C----G--AC--G-------AG-T-G-G-C-GA-A--C--G-GG-T-G-A-G-T-A--AT-A-T-A-T-C-GG---A-A-C-GT-G-C-C-CAG--TA-G-T-G-G--G-G-G---AT-AA-C--TG--C-T-C-G-A-A-A-----…
>H97X84I02IY7RS
G-A-T-G-A--A-C-G-C--T-A-G-C-G-G--G-A-G-G--C---C-T--AA-C--AC-A-T-G--C-A-A-G--C-C--GA-GCGGTATT-------GTT--------------------------------------------------T-C------------------------TTC-G------------------------------G--A------------------------------------------AA--TG------AG-A-GAG-CGGCGTA-C--G-GG-T-G-C-G-G-A--AC-A-C-G-T-G-GG---A-A-T-CT-G-C-C-CTT--GG-G-T-T-C--G-G-A---AT-AA-C--TC--G-C-C-G-A-A-A-----…
>H97X84I02GLI3F
A-A-C-G-A--A-C-G-C--T-G-G-C-G-G--C-A-T-G--C---C-T--TA-C--AC-A-T-G--C-A-A-G--T-C--GA-A-CG-----------G-CAG--C-A--T-------------------------------GA-T-C-T-A-G------------------------CTT-G------------------------------C--T--A-G-A-T--T------------------G-A-T----G--GC--G-------AG-T-G-G-C-GA-A--C--G-GG-T-G-A-G-T-A--AT-A-C-A-T-C-GG---A-A-C-GT-G-C-C-CTG--TA-G-T-G-G--G-G-G---AT-AA-C--TA--G-T-C-G-A-A-A-----…
>H97X84I02GHYN9
G-A-T-G-A--A-C-G-C--T-A-G-C-G-G--C-A-G-G--C---T-T--AA-T--AC-A-T-G--C-A-A-G--T-C--GA-A-CG----------------------------------------------------------G-A-A-G-T------------------------AGCAA------------------------------T--AC-T-T-T-----------------------------------------------AG-T-G-G-C-GC-A--C--G-GG-T-G-A-G-T-A--AC-G-C-G-T-A-CA---TAA-C-AT-G-C-C-TTT--TG-C-T-T-T--G-G-GATAGCCTTGGGAAA--CTGGGAGTA-ATA-----…
>H97X84I02G9KZ8
A-A-C-G-A--A-C-G-C--T-G-G-C-G-G--C-A-T-G--C---C-T--AA-C--AC-A-T-G--C-A-A-G--T-C--GA-A-CG-----------G-AA---A-G--G--------------------------------C-C---T-C-T------------------------TTC-G------------------------------G--G--G---G-G-----------------------T-A----C--TC--G-------AG-T-G-G-C-GA-A--C--G-GG-T-G-A-G-T-A--AC-A-C-G-T-G-AG---TAA-C-CT-G-C-C-CTT--GA-C-T-T-T--G-G-G---AT-AA-C--TT--C-A-G-G-A-A-A-----…
>H97X84I02HPKCK
A-T-T-G-A--A-C-G-C--T-G-G-C-G-G--C-A-G-G--C---C-T--AA-C--AC-A-T-G--C-A-A-G--T-C--GA-G-CG-G---------ATG----A-A--G------------------------------------G-G-A-G------------------------CTT-G------------------------------C--T--C-C-T-------------------------TGA----T---T--T-------AG-C-G-G-C-GG-A--C--G-GG-T-G-A-G-T-A--AT-G-C-T-T-A-GG---A-A-T-CT-G-C-C-TAT--TA-G-T-G-G--G-G-G---AC-AA-C--AT--T-C-C-G-A-A-A-----…
>H97X84I02FZUYS
A-A-C-G-A--A-C-G-C--T-G-G-C-G-G--C-G-G-G--C---C-T--CA-T--AC-A-T-G--C-A-A-G--T-C--GA-A-CG-----------G-TAA--C-A--G--------------------------------------G-T-C------------------------TTC-G------------------------------G--A--T---------------------------G-C-T----G--AC--G-------AG-T-G-G-C-GA-A--C--G-GG-T-G-A-G-T-A--AT-A-C-A-T-C-GG---A-A-C-GT-G-C-C-CGA--TC-G-T-G-G--G-G-G---AT-AA-C--GA--A-G-C-G-A-A-A-----…
>H97X84I02HBU5I
G-A-C-G-A--A-C-G-C--T-G-G-C-G-G--C-A-T-G--C---C-T--AA-T--AC-A-T-G--C-A-A-G--T-C--GA-G-CG-A---------A-C----A-G--A-------------------------------CG-A-G-G-A-G------------------------CTT-G------------------------------C--TC-C-T-C-T--G----------------------A----C--GT--T-------AG-C-G-G-C-GA-A--T--G-GG-T-G-A-G-T-A--AC-A-C-G-T-G-GG---CAA-C-CT-GCC-C-TGT---A-G-T-T-G--G-G-G---AT-AA-C--TC--C-G-G-G-A-A-A-----…
>H97X84I02F6PVF
A---C-G-A--A-C-G-C--T-G-G-C-G-G--C-A-T-G--C---C-T--TA-C--AC-A-T-G--C-A-A-G--T-C--GA-A-CG-----------G-TAA--C-A--G--------------------------------------G-T-C------------------------TTC-G------------------------------G--A--T---------------------------G-C-T----G--AC--G-------AG-T-G-G-C-GA-A--C--G-GG-T-G-A-G-T-A--AT-A-C-A-T-C-GG---A-A-C-GT-G-C-C-CGA--TC-G-T-G-G--G-G-G---AT-AA-C--GA--A-G-C-G-A-A-A-----…
>H97X84I02I6LX9
A-T-T-G-A--A-C-G-C--T-G-G-C-G-G--C-A-T-G--C---C-T--TA-C--AC-A-T-G--C-A-A-G--T-C--GA-A-CG-----------G-CAG--C-AT-GAT------------------------------------C-TAGC----------------------TTGCTA------------------------------G--AT-T---------------------------G-A-T----G--GC--G-------AG-T-G-G-C-GA-A--C--G-GG-T-G-A-G-T-A--AT-A-C-A-T-C-GG---A-A-C-GT-G-C-C-CGA--TC-G-T-G-G--G-G-G---AT-AA-C--GA--A-G-C-G-A-A-A-----…
>H97X84I02F1F4H
A-A-C-G-A--A-C-G-C--T-A-G-C-G-G--G-A-G-G--C---C-T--AA-C--AC-A-T-G--C-A-A-G--C-C--GA-G-CG-G---------T-A----T-T--G------------------------------------T-T-T-C------------------------TTC-G------------------------------G--A--A-A---------------------------T-G----A--GA--G-------AG-C-G-G-C-GT-A--C--G-GG-T-G-C-G-G-A--AC-A-C-G-T-G-TG---CAA-C-CT-G-C-C-TTT--AT-C-T-G-G--G-G-G---AT-AG-C--CT--T-T-C-G-A-A-A-----…
>H97X84I02F15MY
A-G-C-G-A--A-C-G-C--T-G-G-C-G-G--C-A-G-G--C---T-T--AA-C--AC-A-T-G--C-A-A-G--T-C--GA-A-CG-----------G-TAA--C-A--G--------------------------------------G-T-C------------------------TTC-G------------------------------G--A--T---------------------------G-C-T----G--AC--G-------AG-T-G-G-C-GA-A--C--G-GG-T-G-A-G-T-A--AT-A-C-A-T-C-GG---A-A-C-GT-G-C-C-CGA--TC-G-T-G-G--G-G-G---AT-AA-C--GA--G-G-C-G-A-A-A-----…
>H97X84I02JXTQZ
G-A-C-G-A--A-C-G-C--T-G-G-C-G-G--C-G-T-G--C---C-C--AA-T--AC-A-C-G--C-A-A-G--T-C--GA-G-CG-A---------A-C----C-A--A-------------------------------TA-A-G-A-A-G------------------------CTT-G------------------------------C--T--T-T-T-T--G--------------------T-T----G--GT--T-------AG-C-G-G-C-GG-A--C--G-GG-T-G-A-G-T-A--AC-A-C-G-T-G-GG---TAA-C-CT-G-C-C-TGT--AA-G-A-C-C--G-G-G---AT-AA-C--TC--C-G-G-G-A-A-A-----…
>H97X84I02JVO9L
A---T-A-A--A-C-G-C--T-G-G-C-G-G--C-G-C-A--C---A-T--AA-G--AC-A-T-G--C-A-A-G--T-C--GA-A-CG-----------G-TAA--C-A--G----------------------------------------G--------------------------TT--A---------------------------------A------------------------------G-C-T----G--AC--G-------AG-T-G-G-C-GA-A--C--G-GG-T-G-A-G-T-A--AT-G-T-A-T-C-GG---A-A-C-GT-G-C-C-CAG--TC-G-T-G-G--G-G-G---AT-AA-C--TG--C-T-C-G-A-A-A-----…
>H97X84I02JSPG8
A-T-T-G-A--A-C-G-C--T-G-G-C-G-G--C-A-T-G--C---C-T--TA-C--AC-A-T-G--C-A-A-G--T-C--GA-A-CG-----------G-TAA--C-A--G--------------------------------------A-T-C------------------------TTC-G------------------------------G--A--T---------------------------G-C-T----G--AC--G-------AG-T-G-G-C-GA-A--C--G-GG-T-G-A-G-C-A--AT-A-C-A-T-C-GG---A-A-C-GT-G-C-C-CGA--TC-G-T-G-G--G-G-G---AT-AA-C--GA--A-G-C-G-A-A-A-----…
>H97X84I02JSH63
G-A-T-A-A--A-C-G-C--T-G-G-C-G-G--C-G-C-A--C---A-T--AA-G--AC-A-T-G--C-A-A-G--T-C--GA-A-CG-A---------A-C----T-TA-A-------------------------------CT-C-A-T-T-C------------------------TTTTA------------------------------G--A--T---T-G--AG-----------------A-G-C----G--GT--T-------AG-T-G-G-C-GG-A--C--T-GG-T-G-A-G-T-A--AC-G-C-G-T-A-AG---GAA-C-CT-G-C-C-TTT--TA-G-A-G-G--G-G-A---AT-AA-C--AA--T-G-A-G-A-A-A-----…
>H97X84I02FKRTX
G-A-T-G-A--A-C-G-C--T-A-G-C-G-G--G-A-G-G--C---C-T--AA-C--AC-A-T-G--C-A-A-G--C-C--GA-G-C--G---------G--------T-------------------A--------------TG-G-A-T-A-G------------------------CTT-G------------------------------C--T----A---T-----------------------C-C----A--GA--G-------AG-C-G-G-C-GT-A--C--G-GG-T-G-C-G-T-A--AC-A-C-G-T-G-TG---CAA-C-CT-A-C-C-TTT--AT-C-T-G-G--G-G-G---AT-AG-C--CT--T-T-C-G-A-A-A-----…
>H97X84I02JMBBM
G-A-T-G-A--A-C-G-C--T-G-G-C-G-G--C-G-T-G--C---T-T--AA-C--AC-A-T-G--C-A-A-G--T-C--GA-A-C--G---------A-G----A-A--C----------CATTGGA--------------TC-G-A-G-G-A------------------------TTC-G------------------------------T--C--C-A-A-G--TGA--A-GG------------T-GG---G--GA--A-------AG-T-G-G-C-GG-A--C--G-GG-T-G-A-G-T-A--AC-G-C-G-T-G-AG---CAA-T-CT-G-C-C-TTG--GA-G-T-G-G--G-G-A---AT-AA-C--GG--C-T-G-G-A-A-A-----…
>H97X84I02H9EAQ
A-T-T-G-A--A-C-G-C--T-G-G-C-G-G--C-A-G-G--C---T-T--AA-C--AC-A-T-G--C-A-A-G--T-C--GA-G-CG-G---------A-G----A-T--G----------------------------------A-G-G-T-G------------------------CTT-G------------------------------C--A--C-C-T-------------------------T-A----T--CT--T-------AG-C-G-G-C-GG-A--C--G-GG-T-G-A-G-T-A--AT-G-C-T-T-A-GG---A-A-T-CT-G-C-C-TAT--TA-G-T-G-G--G-G-G---AC-AA-C--AT--T-C-C-G-A-A-A-----…
>H97X84I02JFSD4
A-T-T-G-A--A-C-G-C--T-G-G-C-G-G--C-A-T-G--C---C-T--TA-C--AC-A-T-G--C-A-A-G--A-C--GA-A-CG-----------G-TAA--C-A--G--------------------------------------G-T-C------------------------TTC-G------------------------------G--A--T---------------------------G-C-T----G--AT--G-------AG-T-G-G-C-GA-A--C--G-GG-T-G-A-G-T-A--AT-A-C-A-T-C-GG---A-A-C-GT-G-C-C-CGA--TC-G-T-G-G--G-G-G---AT-AA-C--GA--A-G-C-G-A-A-A-----…
>H97X84I02JF3Z1
A-T-T-G-A--A-C-G-C--T-G-G-C-G-G--C-A-T-G--C---C-T--TA-C--AC-A-T-G--C-A-A-G--T-C--GA-G-CG-G---------A-G----A-T--G----------------------------------A-G-G-T-G------------------------CTT-G------------------------------C--A--C-C-T-------------------------T-A----T--CT--T-------AG-C-G-G-C-GG-A--C--G-GG-T-G-A-G-T-A--AT-G-C-T-T-A-GG---A-A-T-CT-G-C-C-TAT--TA-G-T-G-G--G-G-G---AC-AA-C--AT--T-C-C-G-A-A-A-----…
>H97X84I02JDG9T
G-A-C-G-A--A-C-G-C--T-G-G-C-G-G--C-G-T-G--C---C-T--AA-T--AC-A-T-G--T-A-A-G--T-C--GA-G-CG-A---------A-C----C-A--A-------------------------------TA-A-G-A-A-G------------------------CTT-G------------------------------C--T--T-T-T-T--G--------------------T-T----G--GT--T-------AG-C-G-G-C-GG-A--C--G-GG-T-G-A-G-T-A--AC-A-C-G-T-G-GG---TAA-C-CT-G-C-C-TGT--AA-G-A-T-C--G-G-G---AT-AA-C--TC--C-G-G-G-A-A-A-----…
>H97X84I02JDC48
G-A-T-G-A--A-C-G-C--T-A-G-C-G-A--C-A-G-G--C---T-T--AA-C--AC-A-T-G--C-A-A-G--T-C--GA-G-GG-----------G-CAG--C----G----------------G--------------GG-T-T-G-T-AG-----------------------C-A-G---------------------------------T--A-C-A-A--CT-----------------G-C-C----G--GC--G-------AC-C-G-G-C-AC-A--C--G-GG-T-G-A-G-T-A--AC-A-C-G-T-A-TG---TAA-C-CT-G-C-C-CTC--TG-C-A-G-G--G-G-G---AT-AA-G--CG--G-A-A-G-A-A-A-----…
>H97X84I02J7PDW
A---T-G-A--A-C-G-C--T-G-G-C-G-G--C-A-T-G--C---C-T--TA-C--AC-A-T-G--C-A-A-G--T-C--GA-A-CG-----------G-TAA--C-A--G--------------------------------------G-T-C------------------------TTC-G------------------------------G--A--T---------------------------G-C-T----G--AC--G-------AG-T-G-G-C-GA-A--C--G-GG-T-G-A-G-T-A--AT-A-C-A-T-C-GG---A-A-C-GT-G-C-C-CGA--TC-G-T-G-G--G-G-G---AT-AA-C--GA--G-G-C-G-A-A-A-----…
>H97X84I02J5YP9
A-T-T-G-A--G-C-G-C--T-G-G-C-G-G--C-A-T-G--C---C-T--TA-C--AC-A-T-G--C-A-A-G--T-C--GA-A-CG-----------G-TAA--C-A--G--------------------------------------G-T-C------------------------TTC-G------------------------------G--A--T---------------------------G-C-T----G--AC--G-------AG-T-G-G-C-GA-A--C--G-GG-T-G-A-G-T-A--AT-A-C-A-T-C-GG---A-A-C-GC-G-C-C-CGA--TC-G-T-G-G--G-G-G---AT-AA-C--GA--A-G-C-G-A-A-A-----…
>H97X84I02J3KIG
G-A-T-G-A--A-C-G-C--T-A-G-C-G-G--G-A-G-G--C---C-T--AA-C--AC-A-T-G--C-A-A-G--T-C--GA-G-CG-A---------A-C----C-A--A-------------------------------TA-A-G-A-A-G------------------------CTT-G------------------------------C--T--T-T-T-T--G--------------------T-T----G--GT--T-------AG-C-G-G-C-GG-A--C--G-GG-T-G-A-G-T-A--AC-A-C-G-T-G-GG---TAA-C-CT-G-C-C-TGT--AA-G-A-C-C--G-G-G---AT-AA-C--TC--C-G-G-G-A-A-A-----…
>H97X84I02IZJGF
G-A-T-G-G--A-C-G-C--T-A-G-C-G-G--C-A-G-G--C---T-T--AA-T--AC-A-T-G--C-A-A-G--T-CG-AACGGAA--------------------------------------------------------------G-T-A------------------------GCA-A------------------------------T--A--CTTT------------------------------------------------AG-T-G-G-C-GC-A--C--G-GG-T-G-A-G-T-A--AC-G-C-G-T-A-CA---TAA-C-AT-G-C-C-TTT--TG-C-T-T-T--G-G-G---AT-AG-C--CT--T-G-G-G-A-A-A-----…
>H97X84I02HGK59
G-A-C-G-A--A-C-G-C--T-G-G-C-G-G--C-G-T-G--C---C-T--AA-T--AC-A-T-G--C-A-A-G--T-C--GA-G-CG-A---------A-C----C-A--A-------------------------------TA-A-G-A-A-G------------------------CTT-G------------------------------C--T--T-T-T-T--G--------------------T-T----G--GT--T-------AG-C-G-G-C-GG-A--C--G-GG-T-G-A-G-T-A--AC-A-C-G-T-G-GG---TAA-C-CT-G-C-C-TGT--AA-G-A-C-C--G-G-G---AT-AA-C--TC--C-G-G-G-A-A-A-----…
>H97X84I02IW18A
G-A-T-G-A--A-C-G-C--T-A-G-C-G-G--C-A-G-G--C---T-T--AA-T--AC-A-T-G--C-A-A-G--T-C--GA-A-C--G---------G-A------A-----------------------------------------G-T-A------------------------GCA-A------------------------------T--A--C-----------------------------T-T------T------------AG-T-G-G-C-GC-A--C--G-GG-T-G-A-G-T-A--AC-G-C-G-T-A-CA---TAA-C-AT-G-C-C-TTT--TG-C-T-T-T--G-G-G---AT-AG-C--CT--T-G-G-G-A-A-A-----…
>H97X84I02IVW4A
A-T-T-G-A--A-C-G-C--T-G-G-C-G-G--C-A-T-G--C---C-T--TA-C--AC-A-T-G--C-A-A-G--T-C--GA-A-CG-----------G-TA-----A--C------------------------------------A-G-G-T------------------------CTT-C------------------------------G--G--A-T-------------------------G-C-T----G--AC--G-------AG-T-G-G-C-GA-A--C--G-GG-T-G-A-G-T-A--AT-A-C-A-T-C-GG---A-A-C-GT-G-C-C-CAG--TA-G-T-G-G--G-G-G---AT-AA-C--TG--C-T-C-G-A-A-A-----…
>H97X84I02IVUF2
G-A-C-G-G--G-C-G-C--T-G-G-C-G-G--C-G-T-G--C---C-T--AA-T--AC-A-T-G--C-A-A-G--T-C--GA-G-CG-A---------A-C----C-A--A-------------------------------TA-A-G-A-A-G------------------------CTT-G------------------------------C--T--T-T-T-T--G--------------------T-T----G--GT--T-------AG-C-G-G-C-GG-A--C--G-GG-T-G-A-G-T-A--AC-A-C-G-T-G-GG---CAA-C-CT-G-C-C-TGT--AA-G-A-C-C--G-G-G---AT-AA-C--TC--C-G-G-G-A-A-A-----…
>H97X84I02IVD5P
A-T-T-G-A--A-C-G-C--T-G-G-C-G-G--C-A-T-G--C---C-C--TA-C--AC-A-T-G--C-A-A-G--T-C--GA-A-CG-----------G-TAA--C-A--G--------------------------------------G-T-C------------------------TTC-G------------------------------G--A--T---------------------------G-C-T----G--AC--G-------AG-T-G-G-C-GA-A--C--G-GG-T-G-A-G-T-A--AT-A-C-A-T-C-GG---A-A-C-GT-G-C-C-CGA--TC-G-T-G-G--G-G-G---AT-AA-C--GA--G-G-C-G-A-G-A-----…
>H97X84I02GF6RK
A-T-T-G-A--A-C-G-C--T-G-G-C-G-G--C-A-T-G--C---C-T--TA-C--AC-A-C-G--C-A-A-G--T-C--GA-A-CG-----------G-CAG--C-A--TG---------------------------------ATC-T-A-G------------------------CTT-G------------------------------C--TAGA-T-T-----------------------G-A-T----G--GC--G-------AG-T-G-G-C-GA-A--C--G-GG-T-G-A-G-T-A--AT-A-C-A-T-C-GG---A-A-C-GT-G-C-C-CTG--TA-G-T-G-G--G-G-G---AT-AA-C---T--A-GTC-G-A-A-A-----…
>H97X84I02ITIBE
A-T-T-G-A--A-C-G-C--T-G-G-C-G-G--C-A-T-G--C---C-T--TA-C--AC-A-T-G--C-A-A-G--T-C--GA-A-CG-----------G-TAA--C-A--G--------------------------------------G-T-C------------------------TTC-G------------------------------G--A--T---------------------------G-C-T----G--AC--G-------AG-T-G-G-C-GA-A--C--G-AG-T-G-A-G-T-A--AT-A-C-A-T-C-GG---A-A-C-GT-G-C-C-CGA--TC-G-T-G-A--G-G-G---AT-AA-C--GA--G-G-C-G-A-A-A-----…
>H97X84I02IQAZZ
A-A-C-G-A--A-C-G-C--T-G-G-C-G-G--C-G-T-G--C---C-T--AA-T--AC-A-T-G--C-A-A-G--T-C--GA-G-CG-A---------A-C----C-A--A-------------------------------TA-A-G-A-A-G------------------------CTT-G------------------------------C--T--T-T-T-T--G--------------------T-A----G--GT--T-------AG-C-G-G-C-GG-A--C--G-GG-T-G-A-G-T-A--AC-A-C-G-T-G-GG---TAA-C-TT-G-C-C-TGT--AA-G-A-T-C--G-G-G---AT-AA-C--TC--C-G-G-G-A-A-A-----…
>H97X84I02IOOWB
A-T-T-G-A--A-C-G-C--T-G-G-C-G-G--C-A-T-G--C---C-T--TA-C--AC-A-T-G--C-A-A-G--T-C--GA-A-CG-----------G-TAA--C-A--G--------------------------------------G-T-C------------------------TTC-G------------------------------G--A--T---------------------------G-C-T----G--AC--G-------AG-T-G-G-C-GA-A--C--G-GG-T-G-A-G-T-A--AT-A-C-A-T-C-GG---A-A-C-GT-G-C-C-CGA--TC-G-T-G-G--G-G-G---AT-AA-C--G---A-G-C-G-A-A-A-----…
>H97X84I02IN3WI
G-A-C-G-A--A-C-G-C--T-G-G-C-G-G--C-G-T-G--C---C-T--AA-T--AC-A-T-G--C-A-A-G--T-C--GA-G-CG-A---------A-C----C-A--A-------------------------------TA-A-G-A-A-G------------------------CTT-G------------------------------C--T--T-T-T-T--G--------------------T-T----G--GT--T-------AG-C-G-G-C-GG-A--C--G-GG-T-G-A-G-T-A--AC-A-C-G-T-G-GG---TAA-C-CT-G-C-C-TGT--AA-G-A-T-C--G-G-G---AT-AA-C--TC--C-G-G-G-A-A-A-----…
>H97X84I02IMSL3
G-A-T-G-A--A-C-G-C--T-G-G-C-G-G--C-G-T-G--C---T-T--AA-C--AC-A-T-G--C-A-A-G--T-C--GA-A-C--G---------A-G----A-A--C----------CATTGGA--------------TC-G-A-G-G-A------------------------TTC-G------------------------------T--C--C-A-A-G--TGA--A-GG--------------TG---G--GA--A-------AG-T-G-G-C-GG-A--C--G-GG-T-G-A-G-T-A--AC-G-C-G-T-G-AG---CAA-T-CT-G-C-C-TTG--GA-G-T-G-G--G-G-A---AT-AA-C--GG--C-T-G-G-A-A-A-----…
>H97X84I02IKDNN
G-A-C-G-A--A-C-G-C--T-G-G-C-G-G--C-G-T-G--C---C-T--AA-T--AC-A-T-G--C-A-A-G--T-C--GA-G-CA-A---------A-C----C-A--A-------------------------------TA-A-G-A-A-G------------------------CTT-G------------------------------C--T--T-T-T-T--G--------------------T-T----G--GT--T-------AG-C-G-G-C-GG-A--C--G-GG-T-G-A-G-T-A--AC-A-C-G-T-G-GG---CAA-C-CT-G-C-C-TGT--AA-G-A-C-C--G-G-G---AT-AA-C--TC--C-G-G-G-A-A-A-----…
>H97X84I02IJGOX
A-T-T-G-A--A-C-G-C--T-G-G-C-G-G--C-A-T-G--C---C-T--TA-C--AC-A-T-G--C-A-A-G--T-C--GA-A-CG-----------G-TAA--CGG--G----------------------------------------TCC------------------------TTC-G------------------------------G--A--T---------------------------G-C-T----G--AC--G-------AG-T-G-G-C-GA-A--C--G-GG-T-G-A-G-T-A--AT-A-C-A-T-C-GG---A-A-C-GT-G-C-C-CGA--TC-G-T-G-G--G-G-G---AT-AA-C--GA--G-G-C-G-A-A-A-----…
>H97X84I02IWVAB
A-T-T-G-A--A-C-G-C--T-G-G-C-G-G--C-A-T-G--C---C-T--TA-C--AC-A-T-G--C-A-A-G--T-C--GA-A-CG-----------GCAGCA-C-G--G--------------------------------------G-TGC------------------------TTGCA------------------------------C--C--T---------------------------G-G-T----G--GC--G-------AG-T-G-G-C-GA-A--C--G-GG-T-G-A-G-T-A--AT-A-C-A-T-C-GG---A-A-C-GT-G-C-C-CGA--TC-G-T-G-G--G-G-G---AT-AA-C--GA--A-G-C-G-A-A-A-----…
>H97X84I02IHEFO
G-A-C-G-A--A-C-G-C--T-G-G-C-G-G--C-G-T-G--C---C-T--AA-T--AC-A-T-G--C-A-A-G--T-C--GA-G-CG-A---------A-C----C-A--A-------------------------------TA-A-G-A-A-G------------------------CTT-G------------------------------C--T--T-T-T-T--G--------------------C-T----G--GT--T-------AG-C-G-G-C-GG-A--C--G-GG-T-G-A-G-T-A--AC-A-C-G-T-G-GG---TAA-C-CT-G-C-C-TGT--AA-G-A-T-C--G-G-G---AT-AA-C--TC--C-G-G-G-A-A-A-----…
>H97X84I02IGUI8
G-A-T-G-A--A-C-G-C--T-A-G-C-G-G--C-A-G-G--C---T-T--AA-T--AC-A-T-G--C-A-A-G--T-C--GA-G-GG-----------G-CAT--C-A--G-------------------------------C--T-T-A-T-A------------------------GCA-A------------------------------T--A--T-A-G----G------------------G-C-T----G--GC--G-------AC-C-G-G-C-AA-A--C--G-GG-T-G-C-G-G-A--AC-A-C-G-T-A-CA---CAA-CCTT-C-C-C-TT---AA-G-A-G-G--G-G-G---AT-AG-C--CC--A-T-A-G-A-A-A-----…
>H97X84I02IETAQ
A-T-T-G-A--A-C-G-C--T-G-G-C-G-G--C-A-G-G--C---C-T--AA-C--AC-A-T-G--C-A-A-G--T-C--GA-G-CG-----------G-AT---G-A--G----------------------------------A-G-G-A-G------------------------CTT-G------------------------------C--T--C-C-T-------------------------T-G----A--TT--T-------AG-C-G-G-C-GG-A--C--G-GG-T-G-A-G-T-A--AT-G-C-C-T-A-GG---A-A-T-CT-G-C-C-TGG--TA-G-T-G-G--G-G-G---AT-AA-C--GT--T-C-C-G-A-A-A-----…
>H97X84I02IA21I
C-A-G-G-A--A---G------A---C-G-G--C-G-G-G--C---C-T--AA-C--AC-A-T-G--C-A-A-G--C-C--GA-G-CG-G---------T-A----T-T--G------------------------------------T-T-T-C------------------------TTC-G------------------------------G--A--A-A---------------------------T-G----A--GA--G-------AG-C-G-G-C-GT-A--C--G-GG-T-G-C-G-G-A--AC-A-C-G-T-G-TG---CAA-C-CT-G-C-C-TTT--AT-C-T-G-G--G-G-G---AT-AG-C--CT--T-T-C-G-A-A-A-----…
>H97X84I02I9V2Q
G-ATT-G-A--A-C-G-C--T-G-G-C-G-G--C-A-T-G--C---C-T--TA-C--AC-A-T-G--C-A-A-G--T-C--GA-G-CG-A---------A-C----C-A--A-------------------------------TA-A-G-A-A-G------------------------CTT-G------------------------------C--T--T-T-T-T--G--------------------T-T----G--GT--T-------AG-C-G-G-C-GG-A--C--G-GG-T-G-A-G-T-A--AC-A-C-G-T-G-GG---TAA-C-CT-G-C-C-TGT--AA-G-A-C-C--G-G-G---AT-AA-C--TC--C-G-G-G-A-A-A-----…
>H97X84I02I7BN0
G-A-C-G-A--A-C-G-C--T-G-G-C-G-G--C-G-T-G--C---C-T--AA-T--AC-A-T-G--C-A-A-G--T-C--GA-G-CG-A---------A-C----C-A--A-------------------------------TA-A-G-A-A-G------------------------CTT-G------------------------------C--T--T-T-T-T--G--------------------T-T----G--GT--T-------AG-C-G-G-C-GG-A--C--G-GG-T-G-A-G-T-A--AC-A-C-G-T-G-GG---TAA-C-CT-G-C-C-TGT--AA-G-A-T-C--G-G-G---AT-AA-C--TC--C-G-G-G-A-A-A-----…
>H97X84I02I6ENX
A-T-T-G-A--A-C-G-C--T-G-G-C-G-G--C-A-T-G--C---C-T--TA-C--AC-A-T-G--C-A-A-G--T-C--GA-A-CG-----------G-CAG--C-G--C--------------------------------------G-TCC------------------------TTCGG------------------------------G--A--T---------------------------G-G-C----G--GC--G-------AG-T-G-G-C-GA-A--C--G-GG-T-G-A-G-T-A--AT-A-C-A-T-C-GG---A-A-C-GT-G-C-C-CGA--TC-G-T-G-G--G-G-G---AT-AA-C--GA--G-G-C-G-A-A-A-----…
>H97X84I02I69T8
G-ATT-G-A--A-C-G-C--T-G-G-C-G-G--C-G-T-G--C---C-T--AA-T--AC-A-T-G--C-A-A-G--T-C--GA-G-CG-A---------A-C----C-A--A-------------------------------TA-A-G-A-A-G------------------------CTT-G------------------------------C--T--T-T-T-T--G--------------------T-T----G--GT--T-------AG-C-G-G-C-GG-A--C--G-GG-T-G-A-G-T-A--AC-A-C-G-T-G-GG---TAA-C-CT-G-C-C-TGT--AA-G-A-C-C--G-G-G---AT-AA-C--TC--C-G-G-G-A-A-A-----…
>H97X84I02I61QN
A-T-T-G-A--A-C-G-C--T-G-G-C-G-G--C-A-G-G--C---T-T--AA-C--AC-A-T-G--C-A-A-G--T-C--GA-G-CG-----------G-AT---G-A--G----------------------------------A-G-G-A-G------------------------CTT-G------------------------------C--T--C-C-T-------------------------T-G----A--TT--T-------AG-C-G-G-C-GG-A--C--G-GG-T-G-A-G-T-A--AT-G-C-C-T-A-GG---A-A-T-CT-G-C-C-TGG--TA-G-T-G-G--G-G-G---AT-AA-C--GT--C-C-G-G-A-A-A-----…
>H97X84I02I5W85
A-A-C-G-A--A-C-G-C--T-G-G-C-G-G--C-A-T-G--C---C-T--TA-C--AC-A-T-G--C-A-A-G--T-C--GA-A-CG-----------G-CAG--C-A--C------------------------------------G-G-A-C------------------------TTC-G------------------------------G--T--C-T-------------------------G-G-T----G--GC--G-------AG-T-G-G-C-GA-A--C--G-GG-T-G-A-G-T-A--AT-G-T-A-T-C-GG---A-A-C-AT-A-C-C-TTT--AA-G-T-G-G--G-G-G---AT-AA-C--GT--A-G-C-G-A-A-A-----…
>H97X84I02I5I5D
G-A-C-G-A--A-C-G-C--T-G-G-C-G-G--C-G-T-G--C---C-T--AA-T--AC-A-T-G--C-A-A-G--T-C--GA-G-CG-A---------G-C----A-G--A-------------------------------CG-A-G-G-A-G------------------------CTT-G------------------------------C--T--C-C-T-C--T--------------------G-A----C--GT--T-------AG-C-G-G-C-GA-A--T--G-GG-T-G-A-G-T-A--AC-A-C-G-T-G-GG---CAA-C-CT-G-C-C-CTG--TA-G-T-T-G--G-G-G---AT-AA-C--TC--C-G-G-G-A-A-A-----…
>H97X84I02I5GOV
G-A-C-G-G--A-C-G-C--T-G-G-C-G-G--C-A-T-G--C---C-T--AA-T--AC-A-T-G--C-A-A-G--T-C--GA-G-CG-A---------A-C----A-G--A-------------------------------CG-A-G-G-A-G------------------------CTT-G------------------------------C--T--C-C-T-C--T--------------------G-A----C--GT--T-------AG-C-G-G-C-GA-A--T--G-GG-T-G-A-G-T-A--AC-A-C-G-T-G-GG---CAG-C-CT-G-C-C-CTG--TA-G-T-T-G--G-G-G---AT-AA-C--TC--C-G-G-G-A-A-A-----…
>H97X84I02I4BSF
A-G-C-G-A--A-C-G-C--T-G-G-C-G-G--C-A-G-G--C---T-T--AA-C--AC-A-T-G--C-A-A-G--T-C--GA-A-CG-A---------G-A--------------------------------------------------C-C------------------------TTC-G------------------------------G--G------------------------------------------TC--T-------AG-T-G-G-C-GC-A--C--G-GG-T-G-C-G-T-A--AC-G-C-G-T-G-GG---A-A-T-CT-G-C-C-CTT--GG-G-T-T-C--G-G-A---AT-AA-C--TC--G-C-C-G-A-A-A-----…
>H97X84I02I45YW
A-T-T-G-A--A-C-G-C--T-G-G-C-G-G--C-A-T-G--C---C-T--TA-C--AC-A-T-G--C-A-A-G--T-C--GA-A-CG-----------G-TAA--C-A--G--------------------------------------G-T-T------------------------TTC-G------------------------------G--A--T---------------------------G-C-T----G--AC--G-------AG-T-G-G-C-GA-A--C--G-GG-T-G-A-G-T-A--AT-A-C-A-T-C-GG---A-A-C-GT-G-C-C-CAG--AC-G-T-G-G--G-G-G---AT-AA-C--GA--G-G-C-G-A-A-A-----…
>H97X84I02I3DEH
G-A-C-G-A--A-C-G-C--T-G-G-C-G-G--C-G-T-G--C---C-T--AA-T--AC-G-T-G--C-A-A-G--T-C--GA-G-CG-A---------A-C----C-A--A-------------------------------TA-A-G-A-A-G------------------------CTT-G------------------------------C--T--T-T-T-T--G--------------------T-T----G--GT--C-------AG-C-G-G-C-GG-A--C--G-GG-T-G-A-G-T-A--AC-A-C-G-T-G-GG---TAA-C-CT-G-C-C-TGT--AA-G-A-C-C--G-G-G---AT-AA-C--TC--C-G-G-G-A-A-A-----…
>H97X84I02I2H6A
A-T-T-G-A--A-C-G-C--T-G-G-C-G-G--C-A-T-G--C---C-T--TA-C--AC-A-T-G--C-A-A-G--T-C--GA-A-CG-----------G-TAA--C-G--G------------------------------------G-T-C-C------------------------TTC-G------------------------------G--G--A-T-------------------------G-C-C----G--AC--G-------AG-T-G-G-C-GA-A--C--G-GG-T-G-A-G-T-A--AT-A-T-A-T-C-GG---A-A-C-GTGC-C-C-GAT--C--G-T-G-G--G-G-G---AT-AG-C--GA--A-G-C-G-A-A-A-----…
>H97X84I02I2FID
G-A-C-G-A--A-C-G-C--T-G-G-C-G-G--C-G-T-G--C---C-C--AA-T--AC-A-T-G--C-A-A-G--T-C--GA-G-CG-A---------A-C----C-A--A-------------------------------TA-A-G-A-A-G------------------------CCT-G------------------------------C--T--T-T-T-T--G--------------------T-T----G--GT--T-------AG-C-G-G-C-GG-A--C--G-GG-T-G-A-G-T-A--AC-A-C-G-T-G-GG---CAA-C-CT-G-C-C-TGT--AA-G-A-C-C--G-G-G---AT-AA-C--TC--C-G-G-G-A-A-A-----…
>H97X84I02I26T5
A-T-T-G-A--A-C-G-C--T-G-G-C-G-G--C-A-G-G--C---C-T--AA-C--AC-A-T-G--C-A-A-G--T-C--GA-G-CG-G---------A-G----A-T--G----------------------------------A-G-G-T-G------------------------CTT-G------------------------------C--A--C-C-T-------------------------T-A----T--CT--T-------AG-C-G-G-C-GG-A--C--G-GG-T-G-A-G-T-A--AT-G-C-T-T-A-GG---A-A-T-CT-G-C-C-TAT--TA-G-T-G-G--G-G-G---AC-AA-C--AT--T-C-C-G-A-A-A-----…
>H97X84I02HZ4LS
A-G-C-G-A--A-C-G-C--T-G-G-C-G-G--C-A-G-G--C---T-T--AA-C--AC-A-T-G--C-A-A-G--T-C--GA-A-CG-G---------G-C------------------------------------------------A---C------------------------CTC-G------------------------------G-----T---------------------------------------GC--T-------AG-T-G-G-C-AG-A--C--G-GG-T-G-A-G-T-A--AC-G-C-G-T-G-GG---A-A-C-GT-G-C-C-TTT--CG-G-T-T-C--G-G-A---AT-AA-T--CC--A-G-G-G-A-A-A-----…
>H97X84I02HS69T
A-T-T-G-A--A-C-G-C--T-G-G-C-G-G--C-A-G-G--C---T-T--AA-C--AC-A-T-G--C-A-A-G--T-C--GA-A-CG-----------A-TGA--A-A--C----------------------------------T-C-T-A-G------------------------CTT-G------------------------------C--T--A-G-A-------------------------G-AA---G--AT--T-------AG-T-G-G-C-GG-A--C--G-GG-T-G-A-G-T-A--AC-A-T-T-T-A-GG---A-A-T-CT-G-C-C-TAG--TA-G-T-G-G--G-G-G---AT-AG-C--TC--G-G-G-G-A-A-A-----…
>H97X84I02HRFXX
A---T-G-A--A-C-G-C--T-G-G-C-G-G--C-G-T-G--C---T-T--AA-C--AC-A-T-G--C-A-A-G--T-C--GA-A-CG-G---------G-C------------------------------------------------A---C------------------------TTC-G------------------------------G-----T---------------------------------------GC--T-------AG-T-G-G-C-AG-A--C--G-GG-T-G-A-G-T-A--AC-G-C-G-T-G-GG---A-A-C-GT-G-C-C-TTT--CG-G-T-T-C--G-G-A---AT-AA-T--CC--A-G-G-G-A-A-A-----…
>H97X84I02HPBEP
A---C-G-A--A-C-G-C--T-G-G-C-G-G--C-A-T-G--C---C-T--TA-C--AC-A-T-G--C-A-A-G--T-C--GA-A-CG-----------G-TAA--C-A--G--------------------------------------G-T-C------------------------TTC-G------------------------------G--A--T---------------------------G-C-T----G--AC--G-------AG-T-G-G-C-GA-A--C--G-GG-T-G-A-G-T-A--AT-A-C-A-T-C-GG---A-A-C-GT-G-C-C-CGA--TC-G-T-G-G--G-G-G---AT-AA-C--GA--G-G-C-G-A-A-A-----…
>H97X84I02HODDY
A-T-T-G-A--A-C-G-C--T-G-G-C-G-G--C-A-T-G--C---C-T--TA-C--AC-A-T-G--C-A-A-G--T-C--GA-A-CG-----------G-TAA--C-A--G--------------------------------------G-T-C------------------------TTC-G------------------------------G--A--T---------------------------G-C-T----G--GC--G-------AG-T-G-G-C-GA-A--C--G-GG-T-G-C-G-T-A--AT-A-C-A-T-C-GG---A-A-C-GT-G-C-C-CGA--TC-G-T-G-G--G-G-G---AT-AA-C--GA--A-G-C-G-A-A-A-----…
>H97X84I02HNBZQ
A-T-T-G-A--A-C-G-C--T-A-G-C-G-G--G-A-T-G--C---T-T--TA-C--AC-A-T-G--C-A-A-G--T-C--GA-A-CG-----------G-CAG--C-G--C----------------------------------GAGAAAGCTT-----------------------GCT-T------------------------------T--C--T-T-------------------------G-G-C----G--GC--G-------AG-T-G-G-C-GA-A--C--G-GG-T-G-A-G-T-A--AT-G-T-A-T-C-GG---A-A-C-GT-G-C-C-CAG--TA-G-T-G-G--G-G-G---AT-AA-C--TG--C-T-C-G-A-A-A-----…
>H97X84I02GKTWP
A-T-T-G-A--A-C-G-C--T-G-G-C-G-G--C-A-T-G--C---C-T--TA-C--AC-A-T-G--C-A-A-G--T-C--GA-A-CG-----------G-TAA--C-A--G----------------------------------------G--------------------------TT--A---------------------------------A------------------------------G-C-T----G--AC--G-------AG-T-G-G-C-GA-A--C--G-GG-T-G-A-G-T-A--AT-G-T-A-T-C-GG---A-A-C-GT-G-C-C-CAG--TC-G-T-G-G--G-G-G---AT-AA-C--TG--C-T-C-G-A-A-A-----…
>H97X84I02HH45C
A-A-C-G-A--A-C-G-C--T-G-G-C-G-G--C-A-T-G--C---C-T--TA-C--AC-A-T-G--C-A-A-G--T-C--GA-A-CG-----------G-TAA--C-A--G--------------------------------------G-T-C------------------------TTC-G------------------------------G--A--T---------------------------G-C-T----G--AC--G-------AG-T-G-G-C-GA-A--C--G-GG-T-G-A-G-T-A--AT-A-C-A-T-C-GG---A-A-C-GT-G-C-CCAGA---C-G-T-G-G--G-G-G---AT-AA-C--GA--A-G-C-G-A-A-A-----…
>H97X84I02HG4RH
G-A-C-G-A--A-C-G-C--T-G-G-C-G-G--C-G-T-G--C---C-T--AA-T--AC-A-T-G--C-A-A-G--T-C--GA-G-CG-A---------A-C----C-A--A-------------------------------TA-A-G-A-A-G------------------------CTT-G------------------------------C--T--T-T-T-T--G--------------------T-T----G--GT--T-------AG-C-G-G-C-GG-A--C--G-GG-T-G-A-G-T-A--AC-A-C-G-T-G-GG---CAA-C-CT-G-C-C-TGT--AA-G-A-C-C--G-G-G---AT-AA-C--TC--C-G-G-G-A-A-A-----…
>H97X84I02HFWQW
A-G-C-G-A--A-C-G-C--T-G-G-C-G-G--C-A-G-G--C---T-T--AA-C--AC-A-T-G--C-A-A-G----C--GA-A-CG-G---------G-C------------------------------------------------A---C------------------------TTC-G------------------------------G-----T---------------------------------------GC--T-------AG-T-G-G-C-AG-A--C--G-GG-T-G-A-G-T-A--AC-G-C-G-T-G-GG---A-A-C-GT-G-C-C-TTT--CG-G-T-T-C--G-G-A---AT-AA-T--CC--A-G-G-G-A-A-A-----…
>H97X84I02HEK5J
A-G-C-G-A--A-C-G-C--T-G-G-C-G-G--C-A-T-G--C---C-T--TA-C--AC-A-T-G--C-A-A-G--T-C--GA-A-CG-----------G-TAA--C-A--G--------------------------------------G-T-C------------------------TTC-G------------------------------G--A--T---------------------------G-C-T----G--AC--G-------AG-T-G-G-C-GA-A--C--A-GG-T-G-A-G-T-A--AT-A-C-A-T-C-GG---A-A-C-GT-G-C-C-CGA--TC-G-T-G-G--G-G-G---AT-AA-C--GA--G-G-C-G-A-A-A-----…
>H97X84I02HBYPD
A-T-T-G-A--A-C-G-C--T-G-G-C-G-G--C-A-T-G--C---C-T--TA-C--AC-A-T-G--C-A-A-G--T-C--GA-A-CG-----------G-TAA--C-A--G--------------------------------------G-T-C------------------------TTC-G------------------------------G--A--T---------------------------G-C-T----G--AC--G-------AG-T-G-G-C-GA-A--C--G-GG-T-G-A-G-T-A--AT-A-C-A-T-C-GG---A-A-C-GT-G-C-C-CGA--TC-G-T-G-A--G-G-G---AT-AA-C--GA--G-G-C-G-A-A-A-----…
>H97X84I02H84E5
A-T-T-G-A--A-C-G-C--T-G-G-C-G-G--C-A-T-G--C---C-T--TA-C--AC-A-T-G--C-A-A-G--T-C--GA-A-CG-----------G-TA-----A--C--------------------------------------G-G-A------------------------TCC-T------------------------------T--C--G-G-------------------------G-A-T----GCCGAC-G-------AG-T-G-G-C-GA-A--C--G-GG-T-G-A-G-T-A--AT-A-T-A-T-C-GG---A-A-C-GT-G-C-C-CAG--TA-G-T-G-G--G-G-G---AT-AA-C--TG--C-T-C-G-A-A-A-----…
>H97X84I02H80JN
A-T-T-G-A--A-C-G-C--T-G-G-C-G-G--C-A-G-G--C---T-T--AA-C--AC-A-T-G--C-A-A-G--T-C--GA-G-CG-G---------G-G----A-T--G----------------------------------A-G-G-T-G------------------------CTT-G------------------------------C--A--C-C-T-------------------------T-A----T--CT--T-------AG-C-G-G-C-AG-A--C--G-GG-T-G-A-G-T-A--AT-G-C-T-T-A-GG---A-A-T-CT-G-C-C-TAT--TA-G-T-G-G--G-G-G---AC-AA-C--AT--T-C-C-G-A-A-A-----…
>H97X84I02H7ZIJ
A-T-T-G-A--A-C-G-C--T-G-G-C-G-G--C-A-T-G--C---C-T--TA-C--AC-A-T-G--C-A-A-G--T-C--GA-A-CG-----------G-TAA--C-A--G--------------------------------------G-T-C------------------------TTC-G------------------------------G--A--T---------------------------G-C-T----G--AC--G-------AG-T-G-G-C-GA-A--C--G-GG-T-G-A-G-T-A--AT-A-C-A-T-C-GG---A-A-C-GT-G-C-C-CGA--TC-G-T-G-G--G-G-G---AT-AA-C--TA--G-T-C-G-A-A-A-----…
>H97X84I02GW06D
A-T-T-G-A--A-C-G-C--T-G-G-C-G-G--C-A-T-G--C---C-T--TA-C--AC-A-T-G--C-A-A-G--T-C--GA-A-CG-----------GCAGCA-CGG--G----------------------------------------TGC------------------------TTGCA------------------------------C--C--T---------------------------G-G-T----G--GC--G-------AG-T-G-G-C-GA-A--C--G-GG-T-G-A-G-T-A--AT-A-C-A-T-C-GG---A-A-C-GT-G-C-C-CGA--TC-G-T-G-G--G-G-G---AT-AA-C--GA--G-G-C-G-A-A-A-----…
>H97X84I02H20YK
A---C-G-A--A-C-G-C--T-G-G-C-G-G--C-G-T-G--C---C-T--TA-C--AC-A-T-G--C-A-A-G--T-C--GA-A-CG-----------G-TAA--C-A--G--------------------------------------G-T-C------------------------TTC-G------------------------------G--A--C---------------------------G-C-T----G--AC--G-------AG-T-G-G-C-GA-A--C--G-GG-T-G-A-G-T-A--AT-A-C-A-T-C-GG---A-A-C-GT-G-C-C-CGA--TC-G-T-G-G--G-G-G---AT-AA-C--GA--A-G-C-G-A-A-A-----…
>H97X84I02H1ZI4
A-T-T-G-A--A-C-G-C--T-A-G-C-G-G--G-A-T-G--C---T-T--TA-C--AC-A-T-G--C-A-A-G--T-C--GA-A-CG-----------G-CAG--C-G--C----------------G--------------A--G-A-A-A-G------------------------CTT-G------------------------------C--T--T---T-C--TT-----------------G-G-C----G--GC--G-------AG-T-G-G-C-GA-A--C--G-GG-T-G-A-G-T-A--AT-G-T-A-T-C-GG---A-A-C-GT-G-C-C-CAG--TA-G-C-G-G--G-G-G---AT-AA-C--TG--G-C-C-G-A-A-A-----…
>H97X84I02GWMNN
A-T-T-G-A--A-C-G-C--T-G-G-C-G-G--C-A-T-G--C---C-T--AA-C--AC-A-T-G--C-A-A-G--T-C--GA-A-CG-G---------G-C------------------------------------------------A---C------------------------TTC-G------------------------------G-----T---------------------------------------GC--T-------AG-T-G-G-C-AG-A--C--G-GG-T-G-A-G-T-A--AC-G-C-G-T-G-GG---A-A-C-GT-G-C-C-TTT--CG-G-T-T-C--G-G-A---AT-AA-T--CC--A-G-G-G-A-A-A-----…
>H97X84I02GO87K
A-T-T-G-A--A-C-G-C--T-G-G-C-G-G--C-A-T-G--C---C-T--TA-C--AC-A-T-G--C-A-A-G--T-C--GA-A-CG-----------G-CAG--C-AC-G----------------------------------------GAC------------------------TT--C---------------------------------G------------------------------GTCTGGT--G--GC--G-------AG-T-G-G-C-GA-A--C--G-GG-T-G-A-G-T-A--AT-G-T-A-T-C-GG---A-A-C-GT-G-C-C-CAG--TC-G-T-G-G--G-G-G---AT-AA-C--TG--C-T-C-G-A-A-A-----…
>H97X84I02GT4KZ
A-T-T-G-A--A-C-G-C--T-G-G-C-G-G--C-A-T-G--C---C-T--TA-C--AC-A-T-G--C-A-A-G--T-C--GA-A-CG-----------G-TA-----A--C------------------------------------A-G-G--------------------------TTA-A----------------------------------------------------------------G-C-T----G--AC--G-------AG-T-G-G-C-GA-A--C--G-GG-T-G-A-G-T-A--AT-G-T-A-T-C-GG---A-A-C-GT-G-C-C-CAG--TC-G-T-G-G--G-G-G---AT-AA-C--TG--C-T-C-G-A-A-A-----…
>H97X84I02GS80V
G-ATT-G-A--A-C-G-C--T-G-G-C-G-G--C-A-G-G--C---T-T--AA-C--AC-A-T-G--C-A-A-G--T-C--GA-G-GG-----------G-CAG--C----G----------------G--------------GG-T-T-G-T-AG-----------------------C--------------------A-------------A--T--A-C-A-A--CT-----------------G-C-C----G--GC--G-------AC-C-G-G-C-GC-A--C--G-GG-T-G-A-G-T-A--AC-A-C-G-T-A-TG---TAA-C-CT-G-C-C-CTC--TG-C-A-G-G--G-G-G---AT-AA-G--CG--G-A-A-G-A-A-A-----…
>H97X84I02GRCBP
A---C-G-A--A-C-G-C--T-A-G-C-G-G--G-A-G-G--C---C-T--AA-C--AC-A-T-G--C-A-A-G--T-C--GA-A-CG-----------G-TAA--CAA--G----------------------------------------T-C------------------------TTC-G------------------------------G--A--T---------------------------G-C-T----G--AC--G-------AG-T-G-G-C-GA-A--C--G-GG-T-G-A-G-T-A--AT-A-C-A-T-C-GG---A-A-C-GT-G-C-C-CGA--TC-G-T-G-G--G-G-G---AT-AA-C--GA--G-G-C-G-A-A-A-----…
>H97X84I02GQA3W
G-A-C-G-A--A-C-G-C--T-G-G-C-G-G--C-G-T-G--C---C-T--AA-T--AC-A-T-G--C-A-A-G--T-C--GA-G-CG-A---------A-C----C-A--A-------------------------------TA-A-G-A-A-G------------------------CTT-G------------------------------C--T--T-T-T-T--G--------------------T-T----G--GT--T-------AG-C-G-G-C-GG-A--C--G-GG-T-G-A-G-T-A--AC-A-C-G-T-G-GG---TAA-C-CT-G-C-C-TGT--AA-G-A-C-C--G-G-G---AT-AA-C--TC--C-G-G-G-A-A-A-----…
>H97X84I02GIS5V
G-A-C-G-A--A-C-G-C--T-G-G-C-G-G--C-G-T-G--C---C-T--AA-T--AC-A-T-G--C-A-A-A--T-C--GA-G-CG-A---------A-C----C-A--A-------------------------------TA-A-G-A-A-G------------------------CTT-G------------------------------C--T--T-T-T-T--G--------------------T-T----G--GT--T-------AG-C-G-G-C-GG-A--C--G-GG-T-G-A-G-T-A--AC-A-C-G-T-G-GG---CAA-C-CT-G-C-C-TGT--AA-G-A-C-C--G-G-G---AT-AA-C--TC--C-G-G-G-A-A-A-----…
>H97X84I02GFH0E
A-T-T-G-A--A-C-G-C--T-G-G-C-G-G--C-A-G-G--C---T-T--AA-C--AC-A-T-G--C-A-A-G--T-C--GA-G-CG-G---------A-G----A-T--G----------------------------------A-G-G-T-G------------------------CTT-G------------------------------C--A--C-C-T-------------------------T-A----T--CT--T-------AG-C-G-G-C-GG-A--C--G-GG-T-G-A-G-T-A--AT-G-C-T-T-A-GG---A-A-T-CT-G-C-C-ATT--TA-G-T-G-G--G-G-G---AC-AA-C--AT--T-C-C-G-A-A-A-----…
>H97X84I02GEYQ8
A-T-T-G-A--A-C-G-C--T-G-G-C-G-G--C-A-G-G--C---T-T--AA-C--AC-A-T-G--C-A-A-G--T-C--GA-G-CG-G---------G-G----A-T--G----------------------------------A-G-G-T-G------------------------CTC-G------------------------------C--A--C-C-T-------------------------T-A----T--CT--T-------AG-C-G-G-C-GG-A--C--G-GG-T-G-A-G-T-A--AT-G-C-T-T-A-GG---A-A-T-CT-G-C-C-TAT--TA-G-T-G-G--G-G-G---AC-AA-C--AT--T-C-C-G-A-A-A-----…
>H97X84I02G6USW
A-T-T-G-A--A-C-G-C--T-G-G-C-G-G--C-A-T-G--C---C-T--TA-C--AC-A-T-G--C-A-A-G--T-C--GA-A-CG-----------G-TAA--C-A--G--------------------------------------G-T-C------------------------TTC-G------------------------------G--A--T---------------------------G-C-T----G--AC--G-------AG-T-G-G-C-GA-A--C--G-GG-T-G-A-G-T-A--AT-A-C-A-T-C-GG---A-A-C-GT-G-C-C-CTG--TA-G-T-G-G--G-G-G---AT-AA-C--TA--G-T-C-G-A-A-A-----…
>H97X84I02G5EDA
A-T-T-G-A--A-C-G-C--T-G-G-C-G-G--C-A-T-A--C---C-T--TA-C--AC-A-T-G--C-A-A-G--T-C--GA-A-CG-----------G-TAA--C-A--G----------------------------------------GTC------------------------TTCGGA--------------------------------T------------------------------G-C-T----G--AC--G-------AG-T-G-G-C-GA-A--C--G-GG-T-G-A-G-T-A--AT-A-T-A-T-C-GG---A-A-C-GT-G-C-C-CAG--TA-G-T-G-G--G-G-G---AT-AA-C--TG--C-T-C-G-A-A-A-----…
>H97X84I02G4Q63
G-A-C-G-A--A-C-G-C--T-G-G-C-G-G--C-G-T-G--C---C-T--AA-T--AC-A-T-G--C-A-A-G--T-C--GA-G-CG-A---------C-C----C-A--A-------------------------------TA-A-G-A-A-G------------------------CTT-G------------------------------C--T--T-T-T-T--G--------------------T-T----G--GT--T-------AG-C-G-G-C-GG-A--C--G-GG-T-G-A-G-T-A--AC-A-C-G-T-G-GG---TAA-C-CT-G-C-C-TGC--AA-G-A-C-C--G-G-G---AT-AA-C--TC--C-G-G-G-A-A-A-----…
>H97X84I02G2RGB
A---T-G-A--A-C-G-C--T-A-G-C-G-G--G-A-G-G--C---C-T--AA-C--AC-A-T-G--C-A-G-G--T-C--GA-A-CG-----------G-TAA--C-A--G--------------------------------------G-T-C------------------------TTC-G------------------------------G--A--T---------------------------G-C-T----G--AC--G-------AG-T-G-G-C-GA-A--C--G-GG-T-G-A-G-T-A--AT-A-C-A-T-C-GG---A-A-C-GT-G-C-C-CGA--TC-G-T-G-G--G-G-G---AT-AA-C--GA--G-G-C-G-A-A-A-----…
>H97X84I02JKT2Q
A-T-T-G-A--A-C-G-C--T-G-G-C-G-G--C-A-T-G--C---C-T--TA-C--AC-A-T-G--C-A-A-G--T-C--GA-A-CG-----------G-CAG--C-A--T-------------------------------GA-T-C-T-A-G------------------------CTT-G------------------------------C--T--A-G-A-T--T------------------G-A-T----G--GC--G-------AG-T-G-G-C-GA-A--C--G-GG-T-G-A-G-T-A--AT-A-C-A-T-C-GG---A-A-C-GT-G-C-C-CTG--TA-G-T-G-G--G-G-G---AT-AA-C--TA--G-T-C-G-A-A-A-----…
>H97X84I02FXBWS
A-G-C-G-A--A-C-G-C--T-G-G-C-G-G--C-A-T-G--C---C-T--TA-C--AC-A-T-G--C-A-A-G--T-C--GA-A-CG-----------G-TAA--C-A--G--------------------------------------G----------------------------TT------------------------------------A--A---------------------------G-C-T----G--AC--G-------AG-T-G-G-C-GA-A--C--G-GG-T-G-A-G-T-A--AT-A-C-A-T-C-GG---A-A-C-GT-G-C-C-CGA--TC-G-T-G-G--G-G-G---AT-AA-C--GA--A-G-C-G-A-A-A-----…
>H97X84I02FX64W
A---T-G-A--A-C-G-C--T-A-G-C-G-A--C-A-G-G--C---T-T--AA-C--AC-A-T-G--C-A-A-G--C-C--GA-A-CG-G---------G-C------------------------------------------------A---C------------------------TTC-G------------------------------G-----T---------------------------------------GC--T-------AG-T-G-G-C-AG-A--C--G-GG-T-G-A-G-T-A--AC-G-C-G-T-G-GG---A-A-C-GT-G-C-C-TTT--CG-G-T-T-C--G-G-A---AT-AA-T--CC--A-G-G-G-A-A-A-----…
>H97X84I02FWNSL
A---T-G-A--A-C-G-C--T-G-G-C-G-G--C-G-T-G--C---T-T--AA-C--AC-A-T-G--C-A-A-G--T-C--GA-A-CG-G---------G-C------------------------------------------------A---C------------------------TTC-G------------------------------G-----T---------------------------------------GC--T-------AG-T-G-G-C-AG-A--C--G-GG-T-G-A-G-T-A--AC-G-C-G-T-G-GG---A-A-C-GT-G-C-C-TTT--CG-G-T-T-C--G-G-A---AT-AA-T--CC--A-G-G-G-A-A-A-----…
>H97X84I02FV6CZ
G-A-T-G-A--A-C-G-C--T-A-G-C-G-G--C-G-C-A--C---A-T--AA-G--AC-A-T-G--C-A-A-G--T-C--GA-A-CG-A---------A-C----T-TA-A-------------------------------CT-C-A-T-T-C------------------------TTTTA------------------------------G--A--T---T-G--AG-----------------A-G-C----G--GT--T-------AG-T-G-G-C-GG-A--C--T-GG-T-G-A-G-T-A--AC-G-C-G-T-A-AG---GAA-C-CT-G-C-C-TTT--TA-G-A-G-G--G-G-A---AT-AA-C--AA--T-G-A-G-A-A-A-----…
>H97X84I02FT5GW
A-A-C-G-A--A-C-G-C--T-G-G-C-G-G--C-A-T-G--C---C-T--AA-C--AC-A-T-G--C-A-A-G--T-C--GA-A-CG-----------G-TAA--C-A--G--------------------------------------G-T-C------------------------TTC-G------------------------------G--A--T---------------------------G-C-T----G--AC--G-------AG-T-G-G-C-GA-A--C--G-GG-T-G-A-G-T-A--AT-A-C-A-T-C-GG---A-A-C-GT-G-C-C-CGA--TC-G-T-G-G--G-G-G---AT-AA-C--GA--G-G-C-G-A-A-A-----…
>H97X84I02FSZYS
G-A-T-G-A--A-C-G-C--T-G-G-C-G-G--C-G-T-G--C---C-T--AA-C--AC-A-T-G--C-A-A-G--C-C--GA-G-CG-G---------T-A----T-T--G------------------------------------T-T-T-C------------------------TTC-G------------------------------G--A--A-A---------------------------T-G----A--GA--G-------AG-C-G-G-C-GT-A--C--G-GG-T-G-C-G-G-A--AC-A-C-G-T-G-TG---CAA-C-CT-G-C-C-TTT--AT-C-TGG-G--G-G-G---AT-AG-C--CT--T-T-C-G-A-A-A-----…
>H97X84I02FSNDQ
A-A-C-G-A--A-C-G-C--T-G-G-C-G-G--C-A-T-G--C---C-T--AA-C--AC-A-T-G--C-A-A-G--T-C--GA-A-CG-----------G-CAG--C-A--C----------------------------------G-G-G-T-G------------------------CTT-G------------------------------C--A--C-C-T-----------------------G-G-T----G--GC--G-------AG-T-G-G-C-GA-A--C--G-GG-T-G-A-G-T-A--AT-A-C-A-T-C-GG---A-A-C-AT-G-T-C-CTG--TA-G-T-G-G--G-G-G---AT-AG-C--CC--G-G-C-G-A-A-A-----…
>H97X84I02FOBXH
G-A-C-G-A--A-C-G-C--T-G-G-C-G-G--C-G-C-G--C---C-T--AA-T--AC-A-T-G--C-A-A-G--T-C--GA-G-CG-A---------A-C----C-A--A-------------------------------TA-A-G-A-A-G------------------------CTT-G------------------------------C--T--T-T-T-T-----------------------T-G----T--GT--T-------AG-C-G-G-C-GG-A--C--G-GG-T-G-A-G-T-A--AC-A-C-G-T-G-GG---TAA-C-CT-G-C-C-TGT--AA-G-A-T-C--G-G-G---AT-AA-C--TC--C-G-G-G-A-A-A-----…
>H97X84I02FH9FH
G-A-T-G-A--A-C-G-C--T-G-G-C-G-G--C-G-T-G--C---T-T--AA-C--AC-A-T-G--C-A-A-G--T-C--GA-A-CG-G---------A------C----T----------CATAT----------------TG-A---A-A-C--------------------------C-----------------------------------T--A---G----TG---ATTT-------------AT----GA-GT--T-------AG-T-G-G-C-GG-A--C--G-GG-T-G-A-G-T-A--AC-G-C-G-T-G-GA---AAA-C-CT-G-C-C-GTA--TA-C-T-G-G--G-G-G---AT-AA-C--AC--T-T-A-G-A-A-A-----…
>H97X84I02F86SU
G-A-T-G-A--A-C-G-C--T-A-G-C-G-G--C-A-G-G--C---T-T--AA-T--AC-A-T-G--C-A-A-G--T-C--GA-A-CG-----------G-AAG--T-A---------------------------------------G-C-A-A------------------------TAC-----------------------------------T----------------------------------T-----------T-------AG-T-G-G-C-GC-A--C--G-GG-T-G-A-G-T-A--AC-G-C-G-T-A-CA---TAA-C-AT-G-C-T-TTT--TG-C-T-T-T--G-G-G---AT-AG-C--CT--T-G-G-G-A-A-A-----…
>H97X84I02F4GM2
A-T-T-G-A--A-C-G-C--T-G-G-C-G-G--C-A-T-G--C---C-T--TA-C--AC-A-T-G--C-A-A-G--T-C--GA-A-CG-----------G-TAA--C-A--G--------------------------------------G-T-C------------------------TTC-G------------------------------G--A--T---------------------------G-C-T----G--AC--G-------AG-T-G-G-C-GA-A--C--G-GG-T-G-A-G-T-A--AT-A-C-A-T-C-GG---A-A-C-GT-G-C-C-CTG--TA-G-T-G-G--G-G-G---AT-AA-C--TG--C-T-C-G-A-A-A-----…
>H97X84I02F3905
G-ATT-G-A--A-C-G-C--T-G-G-C-G-G--C-A-T-G--C---C-T--TA-C--AC-A-T-G--C-A-A-G--T-C--GA-A-CG-----------G-AA---A-G--G--------------------------------C-C-C-T-G-C------------------------TTT-T------------------------------G--T--G-G-G-G-----------------------T-G----C--TC--G-------AG-T-G-G-C-GA-A--C--G-GG-T-G-A-G-T-A--AC-A-C-G-T-G-AG---TAA-C-CT-G-C-C-CTT--GA-C-T-T-T--G-G-G---AT-AA-C--TT--C-A-G-G-A-A-A-----…
>H97X84I02F0MD1
G-A-C-G-A--A-C-G-C--T-G-G-C-G-G--C-G-T-G--C---C-T--AA-T--AC-A-T-G--C-A-A-G--T-C--GA-G-CG-A---------A-C----C-A--A-------------------------------TA-A-G-A-A-G------------------------CTT-G------------------------------C--T--T-T-T-T--G--------------------T-T----G--GT--T-------AG-C-G-G-C-GG-A--C--G-GG-T-G-A-G-T-A--AC-A-C-G-T-G-GG---TAA-C-CT-G-C-C-TGT--AA-G-A-C-C--G-G-G---AT-GA-C--TC--C-G-G-G-A-A-A-----…
>H97X84I02F0790
G-A-C-G-G--A-C-G-C--T-G-G-C-G-G--C-A-T-G--C---C-T--AA-T--AC-A-T-G--C-A-A-G--T-C--GA-G-CG-A---------A-C----C-A--A-------------------------------TA-A-G-A-A-G------------------------CTT-G------------------------------C--T--T-T-T-T--G--------------------T-T----G--GT--T-------AG-C-G-G-C-GG-A--C--G-GG-T-G-A-G-T-A--AC-A-C-G-T-G-GG---CAA-C-CT-G-C-C-TGT--AA-G-A-C-C--G-G-G---AT-AA-C--TC--C-G-G-G-A-A-A-----…
>H97X84I02HF28M
A-A-C-G-A--A-C-G-C--T-G-G-C-G-G--C-A-T-G--C---C-T--AA-T--AC-A-T-G--C-A-A-G--T-C--GA-A-CG-A---------G-A--------------------------------------------------T-C------------------------TTC-G------------------------------G--A------------------------------------------TC--T-------AG-T-G-G-C-GC-A--C--G-GG-T-G-C-G-T-A--AC-G-C-G-T-G-GG---A-A-T-CT-G-C-C-CTT--GG-G-T-T-C--G-G-A---AT-AA-C--AG--T-T-A-G-A-A-A-----…
>H97X84I02IFIFG
[truncated: 47,677 more rows]
