# Supplementary material for: Changes in the Bacterial Microbiota in Gut, Blood, and Lungs following Acute LPS Instillation into Mice Lungs
Source: PLoS One. 2014 Oct 21;9(10):e111228. doi: 10.1371/journal.pone.0111228 (PMC4205020; doi:10.1371/journal.pone.0111228)
Supplement: Table S5 — Antibiotic sequence alignment list. (XLSX) [file pone.0111228.s006.xlsx]

## Sheet: Table S5
ICSZ4EG01ER6AS	k__Bacteria(100);p__Proteobacteria(100);c__Alphaproteobacteria(100);o__Sphingomonadales(100);f__Sphingomonadaceae(100);g__Sphingomonas(98);s__Caulobacterleidyi(98);
ICSZ4EG01DS5OT	k__Bacteria(100);p__Proteobacteria(100);c__Betaproteobacteria(99);o__Burkholderiales(98);unclassified;unclassified;unclassified;
ICSZ4EG01D7ZRG	k__Bacteria(100);p__Bacteroidetes(100);c__Flavobacteria(100);o__Flavobacteriales(100);f__Flavobacteriaceae(100);g__Chryseobacterium(85);unclassified;
ICSZ4EG01BNKCW	k__Bacteria(100);p__Proteobacteria(100);c__Betaproteobacteria(100);o__Burkholderiales(100);f__Comamonadaceae(100);g__Diaphorobacter(100);unclassified;
ICSZ4EG01D0PVD	k__Bacteria(100);p__Bacteroidetes(100);c__Flavobacteria(100);o__Flavobacteriales(100);f__Flavobacteriaceae(100);unclassified;unclassified;
ICSZ4EG01CZCFK	k__Bacteria(99);unclassified;unclassified;unclassified;unclassified;unclassified;unclassified;
ICSZ4EG01C2JZM	k__Bacteria(100);p__Actinobacteria(100);c__Actinobacteria(100);o__Actinomycetales(100);f__Propionibacteriaceae(100);g__Propionibacterium(100);s__Propionibacteriumacne(100);
ICSZ4EG01EK8UH	k__Bacteria(100);p__Proteobacteria(100);c__Betaproteobacteria(100);o__Burkholderiales(100);f__Comamonadaceae(100);g__Acidovorax(94);unclassified;
ICSZ4EG01A6VK2	k__Bacteria(100);p__Proteobacteria(100);c__Betaproteobacteria(100);o__Burkholderiales(100);f__Comamonadaceae(100);g__Acidovorax(96);s__Acidovoraxcaen(84);
ICSZ4EG01EPGNA	k__Bacteria(100);p__Actinobacteria(100);c__Actinobacteria(100);o__Actinomycetales(100);f__Corynebacteriaceae(100);g__Corynebacterium(100);unclassified;
ICSZ4EG01EF6R1	k__Bacteria(100);p__Proteobacteria(100);c__Alphaproteobacteria(100);o__Sphingomonadales(100);f__Sphingomonadaceae(100);g__Sphingomonas(100);s__Caulobacterleidyi(100);
ICSZ4EG01D3B3N	k__Bacteria(100);p__Proteobacteria(100);c__Betaproteobacteria(100);o__Burkholderiales(100);f__Comamonadaceae(100);g__Diaphorobacter(96);unclassified;
ICSZ4EG01BRVJI	k__Bacteria(100);p__Proteobacteria(100);c__Betaproteobacteria(100);o__Burkholderiales(100);f__Comamonadaceae(81);unclassified;unclassified;
ICSZ4EG01DL492	k__Bacteria(100);p__Bacteroidetes(100);c__Sphingobacteria(98);o__Sphingobacteriales(98);unclassified;unclassified;unclassified;
ICSZ4EG01DJG25	k__Bacteria(100);p__Proteobacteria(100);c__Betaproteobacteria(100);o__Burkholderiales(100);f__Comamonadaceae(100);g__Acidovorax(98);s__Acidovoraxcaen(92);
ICSZ4EG01EXWAO	k__Bacteria(100);p__Proteobacteria(99);c__Betaproteobacteria(96);o__Burkholderiales(94);unclassified;unclassified;unclassified;
ICSZ4EG01AIDLV	k__Bacteria(100);p__Proteobacteria(100);c__Alphaproteobacteria(100);o__Sphingomonadales(100);f__Sphingomonadaceae(100);g__Sphingomonas(98);s__Caulobacterleidyi(98);
ICSZ4EG01AE4ZL	k__Bacteria(100);p__Proteobacteria(100);c__Betaproteobacteria(100);o__Burkholderiales(100);f__Comamonadaceae(100);g__Acidovorax(99);unclassified;
ICSZ4EG01EAMQW	k__Bacteria(100);p__Proteobacteria(100);c__Betaproteobacteria(100);o__Burkholderiales(100);unclassified;unclassified;unclassified;
ICSZ4EG01APJOW	k__Bacteria(100);p__Proteobacteria(100);c__Betaproteobacteria(100);o__Burkholderiales(98);unclassified;unclassified;unclassified;
ICSZ4EG01DET7A	k__Bacteria(100);p__Proteobacteria(100);c__Betaproteobacteria(100);o__Rhodocyclales(99);f__Rhodocyclaceae(99);g__Zoogloea(99);unclassified;
ICSZ4EG01CCUFW	k__Bacteria(100);p__Proteobacteria(100);c__Betaproteobacteria(100);o__Burkholderiales(99);f__Comamonadaceae(92);g__Acidovorax(83);unclassified;
ICSZ4EG01C15KF	k__Bacteria(100);p__Proteobacteria(100);c__Alphaproteobacteria(100);o__Sphingomonadales(100);f__Sphingomonadaceae(100);g__Sphingomonas(100);s__Caulobacterleidyi(100);
ICSZ4EG01BM8YA	k__Bacteria(100);p__Proteobacteria(100);c__Betaproteobacteria(100);o__Burkholderiales(100);f__Comamonadaceae(100);g__Diaphorobacter(88);unclassified;
ICSZ4EG01A68QP	k__Bacteria(100);p__Proteobacteria(100);c__Betaproteobacteria(99);o__Burkholderiales(97);f__Comamonadaceae(81);unclassified;unclassified;
ICSZ4EG01EZN36	k__Bacteria(100);p__Proteobacteria(100);c__Betaproteobacteria(100);o__Burkholderiales(100);f__Comamonadaceae(100);unclassified;unclassified;
ICSZ4EG01EXDK9	k__Bacteria(100);p__Proteobacteria(100);c__Betaproteobacteria(100);o__Burkholderiales(100);unclassified;unclassified;unclassified;
ICSZ4EG01EWSVN	k__Bacteria(100);p__Proteobacteria(100);c__Betaproteobacteria(100);o__Burkholderiales(100);unclassified;unclassified;unclassified;
ICSZ4EG02F4CCS	k__Bacteria(100);p__Proteobacteria(100);c__Betaproteobacteria(100);o__Burkholderiales(100);f__Comamonadaceae(100);unclassified;unclassified;
ICSZ4EG01ERNW1	k__Bacteria(100);p__Proteobacteria(99);c__Alphaproteobacteria(99);o__Sphingomonadales(99);f__Sphingomonadaceae(99);g__Sphingomonas(97);s__Caulobacterleidyi(97);
ICSZ4EG01EN720	k__Bacteria(100);p__Actinobacteria(100);c__Actinobacteria(100);o__Actinomycetales(100);f__Propionibacteriaceae(100);g__Propionibacterium(100);s__Propionibacteriumacne(100);
ICSZ4EG01EB2AB	k__Bacteria(100);p__Proteobacteria(100);c__Betaproteobacteria(100);o__Burkholderiales(100);unclassified;unclassified;unclassified;
ICSZ4EG01EAN59	k__Bacteria(100);p__Actinobacteria(100);c__Actinobacteria(100);o__Actinomycetales(100);f__Corynebacteriaceae(99);g__Corynebacterium(99);unclassified;
ICSZ4EG01DZXLO	k__Bacteria(100);p__Bacteroidetes(100);c__Flavobacteria(100);o__Flavobacteriales(100);f__Flavobacteriaceae(100);unclassified;unclassified;
ICSZ4EG01DZBZN	k__Bacteria(100);p__Actinobacteria(100);c__Actinobacteria(100);o__Actinomycetales(100);f__Propionibacteriaceae(100);g__Propionibacterium(100);s__Propionibacteriumacne(100);
ICSZ4EG01DY945	k__Bacteria(100);p__Bacteroidetes(100);c__Flavobacteria(100);o__Flavobacteriales(100);f__Flavobacteriaceae(100);unclassified;unclassified;
ICSZ4EG01DY0GA	k__Bacteria(100);p__Bacteroidetes(100);c__Flavobacteria(100);o__Flavobacteriales(100);f__Flavobacteriaceae(100);unclassified;unclassified;
ICSZ4EG01DWU2H	k__Bacteria(100);p__Proteobacteria(100);c__Betaproteobacteria(99);o__Burkholderiales(93);unclassified;unclassified;unclassified;
ICSZ4EG01DS1W9	k__Bacteria(100);p__Bacteroidetes(100);c__Bacteroidia(100);o__Bacteroidales(100);f__Prevotellaceae(100);g__Prevotella(100);unclassified;
ICSZ4EG01DR4IE	k__Bacteria(100);p__Proteobacteria(100);c__Betaproteobacteria(100);o__Burkholderiales(99);f__Comamonadaceae(82);unclassified;unclassified;
ICSZ4EG01DOGF4	k__Bacteria(99);p__Proteobacteria(99);c__Alphaproteobacteria(93);o__Sphingomonadales(93);f__Sphingomonadaceae(93);g__Sphingomonas(92);s__Caulobacterleidyi(92);
ICSZ4EG01DQLP6	k__Bacteria(100);unclassified;unclassified;unclassified;unclassified;unclassified;unclassified;
ICSZ4EG01DMLY6	k__Bacteria(100);p__Proteobacteria(100);c__Alphaproteobacteria(100);o__Sphingomonadales(100);f__Sphingomonadaceae(100);g__Sphingomonas(100);s__Caulobacterleidyi(100);
ICSZ4EG02H02PX	k__Bacteria(100);p__Proteobacteria(100);c__Betaproteobacteria(100);o__Burkholderiales(100);f__Comamonadaceae(86);unclassified;unclassified;
ICSZ4EG01DKZJ6	k__Bacteria(100);p__Proteobacteria(100);c__Betaproteobacteria(100);o__Burkholderiales(100);f__Comamonadaceae(100);g__Diaphorobacter(97);unclassified;
ICSZ4EG01DHJFU	k__Bacteria(100);p__Proteobacteria(100);c__Betaproteobacteria(100);o__Burkholderiales(100);f__Comamonadaceae(96);unclassified;unclassified;
ICSZ4EG01DE2LD	k__Bacteria(100);p__Proteobacteria(100);c__Alphaproteobacteria(100);o__Sphingomonadales(100);f__Sphingomonadaceae(100);g__Sphingomonas(99);s__Caulobacterleidyi(99);
ICSZ4EG01D8GP3	k__Bacteria(100);p__Proteobacteria(98);c__Betaproteobacteria(97);o__Burkholderiales(97);unclassified;unclassified;unclassified;
ICSZ4EG01D7RE4	k__Bacteria(100);p__Proteobacteria(100);c__Alphaproteobacteria(100);o__Sphingomonadales(100);f__Sphingomonadaceae(100);g__Sphingomonas(99);s__Caulobacterleidyi(99);
ICSZ4EG01D67LX	k__Bacteria(100);p__Proteobacteria(99);c__Betaproteobacteria(99);o__Burkholderiales(99);unclassified;unclassified;unclassified;
ICSZ4EG01D3UWY	k__Bacteria(100);p__Bacteroidetes(100);c__Flavobacteria(100);o__Flavobacteriales(100);f__Flavobacteriaceae(100);unclassified;unclassified;
ICSZ4EG01D3PRX	k__Bacteria(100);p__Bacteroidetes(100);c__Flavobacteria(100);o__Flavobacteriales(100);f__Flavobacteriaceae(100);unclassified;unclassified;
ICSZ4EG01D06YC	k__Bacteria(100);p__Proteobacteria(100);c__Betaproteobacteria(100);o__Burkholderiales(98);f__Comamonadaceae(82);unclassified;unclassified;
ICSZ4EG01CZMYC	k__Bacteria(100);p__Proteobacteria(100);c__Betaproteobacteria(98);o__Burkholderiales(96);unclassified;unclassified;unclassified;
ICSZ4EG01CYV5J	k__Bacteria(100);p__Proteobacteria(99);c__Betaproteobacteria(99);o__Burkholderiales(97);f__Comamonadaceae(86);unclassified;unclassified;
ICSZ4EG01CXH99	k__Bacteria(97);unclassified;unclassified;unclassified;unclassified;unclassified;unclassified;
ICSZ4EG01CTYEY	k__Bacteria(100);p__Proteobacteria(100);c__Betaproteobacteria(100);o__Burkholderiales(100);f__Comamonadaceae(100);g__Diaphorobacter(93);unclassified;
ICSZ4EG01ASZ68	k__Bacteria(100);p__Proteobacteria(100);c__Betaproteobacteria(100);o__Burkholderiales(100);f__Comamonadaceae(100);g__Acidovorax(92);unclassified;
ICSZ4EG01CSJ5Q	k__Bacteria(100);p__Proteobacteria(100);c__Betaproteobacteria(100);o__Burkholderiales(100);unclassified;unclassified;unclassified;
ICSZ4EG01COZMR	k__Bacteria(100);p__Proteobacteria(99);c__Betaproteobacteria(97);o__Burkholderiales(97);f__Comamonadaceae(84);unclassified;unclassified;
ICSZ4EG01CMJ99	k__Bacteria(100);p__Proteobacteria(100);c__Alphaproteobacteria(100);o__Sphingomonadales(100);f__Sphingomonadaceae(100);g__Sphingomonas(97);s__Caulobacterleidyi(97);
ICSZ4EG01CKGU1	k__Bacteria(100);p__Actinobacteria(99);c__Actinobacteria(99);o__Actinomycetales(99);f__Corynebacteriaceae(96);g__Corynebacterium(96);unclassified;
ICSZ4EG01CKG3G	k__Bacteria(100);p__Actinobacteria(100);c__Actinobacteria(100);o__Actinomycetales(100);f__Propionibacteriaceae(100);g__Propionibacterium(100);s__Propionibacteriumacne(100);
ICSZ4EG01CISRY	k__Bacteria(100);p__Proteobacteria(100);c__Betaproteobacteria(100);o__Burkholderiales(99);f__Comamonadaceae(89);unclassified;unclassified;
ICSZ4EG01CIRLF	k__Bacteria(100);p__Proteobacteria(100);c__Betaproteobacteria(100);o__Burkholderiales(100);f__Comamonadaceae(100);unclassified;unclassified;
ICSZ4EG01ARGX0	k__Bacteria(100);p__Proteobacteria(100);c__Betaproteobacteria(100);o__Burkholderiales(100);f__Comamonadaceae(100);g__Diaphorobacter(95);unclassified;
ICSZ4EG01CC9P1	k__Bacteria(100);p__Proteobacteria(100);c__Betaproteobacteria(100);o__Burkholderiales(99);unclassified;unclassified;unclassified;
ICSZ4EG01C8LCX	k__Bacteria(100);p__Proteobacteria(100);c__Alphaproteobacteria(100);o__Sphingomonadales(100);f__Sphingomonadaceae(100);g__Sphingomonas(94);s__Caulobacterleidyi(93);
ICSZ4EG01C8IX3	k__Bacteria(100);p__Proteobacteria(100);c__Betaproteobacteria(100);o__Burkholderiales(100);unclassified;unclassified;unclassified;
ICSZ4EG01C6KAU	k__Bacteria(100);p__Proteobacteria(100);c__Betaproteobacteria(100);o__Burkholderiales(100);f__Comamonadaceae(100);g__Acidovorax(89);unclassified;
ICSZ4EG01C638Y	k__Bacteria(100);p__Proteobacteria(100);c__Betaproteobacteria(100);o__Burkholderiales(98);unclassified;unclassified;unclassified;
ICSZ4EG01C381O	k__Bacteria(100);p__Proteobacteria(100);c__Betaproteobacteria(100);o__Burkholderiales(100);f__Comamonadaceae(100);g__Acidovorax(98);unclassified;
ICSZ4EG01BVKE9	k__Bacteria(100);p__Bacteroidetes(100);c__Flavobacteria(100);o__Flavobacteriales(100);f__Flavobacteriaceae(100);unclassified;unclassified;
ICSZ4EG01BVIPU	k__Bacteria(100);p__Proteobacteria(100);c__Betaproteobacteria(100);o__Burkholderiales(99);unclassified;unclassified;unclassified;
ICSZ4EG01BTPLH	k__Bacteria(100);p__Proteobacteria(100);c__Betaproteobacteria(100);o__Burkholderiales(100);f__Comamonadaceae(100);g__Diaphorobacter(83);unclassified;
ICSZ4EG01BTKEH	k__Bacteria(100);p__Proteobacteria(100);c__Alphaproteobacteria(100);o__Sphingomonadales(100);f__Sphingomonadaceae(100);g__Sphingomonas(100);s__Caulobacterleidyi(100);
ICSZ4EG01BSF9X	k__Bacteria(100);p__Proteobacteria(100);c__Betaproteobacteria(100);o__Burkholderiales(100);f__Comamonadaceae(100);unclassified;unclassified;
ICSZ4EG01BS84M	k__Bacteria(100);p__Proteobacteria(100);c__Betaproteobacteria(100);o__Burkholderiales(100);f__Comamonadaceae(100);unclassified;unclassified;
ICSZ4EG01BRP9Y	k__Bacteria(100);p__Proteobacteria(100);c__Alphaproteobacteria(100);o__Sphingomonadales(100);f__Sphingomonadaceae(100);g__Sphingomonas(100);s__Caulobacterleidyi(100);
ICSZ4EG01BPR0N	k__Bacteria(100);p__Proteobacteria(100);c__Betaproteobacteria(99);o__Burkholderiales(94);unclassified;unclassified;unclassified;
ICSZ4EG01BP4ZG	k__Bacteria(100);p__Bacteroidetes(100);c__Flavobacteria(100);o__Flavobacteriales(100);f__Flavobacteriaceae(100);unclassified;unclassified;
ICSZ4EG01BOQFC	k__Bacteria(100);p__Proteobacteria(100);c__Betaproteobacteria(100);o__Burkholderiales(100);f__Comamonadaceae(91);unclassified;unclassified;
ICSZ4EG01BN3FO	k__Bacteria(100);p__Proteobacteria(100);c__Betaproteobacteria(100);o__Burkholderiales(99);unclassified;unclassified;unclassified;
ICSZ4EG01BL5SZ	k__Bacteria(100);p__Proteobacteria(100);c__Betaproteobacteria(100);o__Burkholderiales(99);unclassified;unclassified;unclassified;
ICSZ4EG01BIBGD	k__Bacteria(100);p__Bacteroidetes(100);c__Flavobacteria(100);o__Flavobacteriales(100);f__Flavobacteriaceae(100);unclassified;unclassified;
ICSZ4EG01BHI8C	k__Bacteria(100);p__Proteobacteria(100);c__Betaproteobacteria(98);o__Burkholderiales(97);unclassified;unclassified;unclassified;
ICSZ4EG01BH9FM	k__Bacteria(100);p__Proteobacteria(100);c__Betaproteobacteria(100);o__Burkholderiales(100);f__Comamonadaceae(100);g__Acidovorax(97);s__Acidovoraxcaen(91);
ICSZ4EG01BF03F	k__Bacteria(100);p__Proteobacteria(100);c__Alphaproteobacteria(100);o__Sphingomonadales(100);f__Sphingomonadaceae(100);g__Sphingomonas(100);s__Caulobacterleidyi(100);
ICSZ4EG01BBMQ9	k__Bacteria(100);p__Actinobacteria(100);c__Actinobacteria(100);o__Actinomycetales(100);f__Propionibacteriaceae(100);g__Propionibacterium(100);s__Propionibacteriumacne(100);
ICSZ4EG01BB2BM	k__Bacteria(100);p__Proteobacteria(100);c__Betaproteobacteria(100);o__Burkholderiales(100);f__Comamonadaceae(100);g__Acidovorax(93);unclassified;
ICSZ4EG01B4RS3	k__Bacteria(100);p__Proteobacteria(100);c__Gammaproteobacteria(100);o__Enterobacteriales(100);f__Enterobacteriaceae(100);unclassified;unclassified;
ICSZ4EG01B3FF7	k__Bacteria(100);p__Proteobacteria(100);c__Betaproteobacteria(100);o__Burkholderiales(100);f__Comamonadaceae(100);g__Acidovorax(99);unclassified;
ICSZ4EG01AZ744	k__Bacteria(100);p__Actinobacteria(100);c__Actinobacteria(100);o__Actinomycetales(100);f__Propionibacteriaceae(100);g__Propionibacterium(100);s__Propionibacteriumacne(100);
ICSZ4EG01AYRIH	k__Bacteria(100);p__Proteobacteria(100);c__Betaproteobacteria(100);o__Burkholderiales(100);f__Comamonadaceae(100);g__Diaphorobacter(100);unclassified;
ICSZ4EG01AYEBG	k__Bacteria(98);unclassified;unclassified;unclassified;unclassified;unclassified;unclassified;
ICSZ4EG01AVVFE	k__Bacteria(100);p__Proteobacteria(100);c__Betaproteobacteria(100);o__Burkholderiales(100);f__Comamonadaceae(100);g__Acidovorax(95);s__Acidovoraxcaen(87);
ICSZ4EG01AULXN	k__Bacteria(100);p__Proteobacteria(100);c__Betaproteobacteria(100);o__Burkholderiales(99);unclassified;unclassified;unclassified;
ICSZ4EG01ATVOT	k__Bacteria(100);p__Proteobacteria(100);c__Betaproteobacteria(100);o__Burkholderiales(100);f__Comamonadaceae(100);g__Diaphorobacter(83);unclassified;
ICSZ4EG01APPFB	k__Bacteria(100);p__Proteobacteria(100);c__Betaproteobacteria(100);o__Burkholderiales(100);f__Comamonadaceae(100);g__Acidovorax(100);s__Acidovoraxcaen(91);
ICSZ4EG01AO75L	k__Bacteria(100);p__Proteobacteria(100);c__Betaproteobacteria(100);o__Burkholderiales(96);unclassified;unclassified;unclassified;
ICSZ4EG01AFVW1	k__Bacteria(100);p__Bacteroidetes(87);unclassified;unclassified;unclassified;unclassified;unclassified;
ICSZ4EG01AFFAD	k__Bacteria(100);p__Proteobacteria(100);c__Gammaproteobacteria(100);o__Enterobacteriales(100);f__Enterobacteriaceae(100);g__Providencia(100);s__Providenciaalcalifacien(91);
ICSZ4EG01ACXOU	k__Bacteria(99);unclassified;unclassified;unclassified;unclassified;unclassified;unclassified;
ICSZ4EG01BN91K	k__Bacteria(100);p__Proteobacteria(100);c__Betaproteobacteria(100);o__Burkholderiales(100);f__Comamonadaceae(96);unclassified;unclassified;
ICSZ4EG01A1GXW	k__Bacteria(100);p__Proteobacteria(100);c__Betaproteobacteria(100);o__Burkholderiales(99);unclassified;unclassified;unclassified;
ICSZ4EG01A0U89	k__Bacteria(100);p__Proteobacteria(100);c__Betaproteobacteria(100);o__Burkholderiales(100);f__Comamonadaceae(100);g__Diaphorobacter(99);unclassified;
ICSZ4EG01A0S6Z	k__Bacteria(100);p__Proteobacteria(100);c__Betaproteobacteria(100);o__Burkholderiales(100);f__Comamonadaceae(100);g__Acidovorax(96);unclassified;
ICSZ4EG01B45HT	k__Bacteria(100);p__Proteobacteria(100);c__Betaproteobacteria(100);o__Burkholderiales(100);f__Burkholderiaceae(100);g__Ralstonia(100);unclassified;
ICSZ4EG01A658Z	k__Bacteria(100);p__Proteobacteria(100);c__Betaproteobacteria(100);o__Burkholderiales(100);f__Burkholderiaceae(100);g__Ralstonia(100);unclassified;
ICSZ4EG01A4GDC	k__Bacteria(100);p__Proteobacteria(100);c__Alphaproteobacteria(100);o__Rhizobiales(100);f__Bradyrhizobiaceae(100);unclassified;unclassified;
ICSZ4EG01CHVS7	k__Bacteria(100);p__Proteobacteria(100);c__Betaproteobacteria(100);o__Burkholderiales(100);f__Comamonadaceae(100);g__Acidovorax(90);unclassified;
ICSZ4EG01BTJP9	k__Bacteria(100);p__Proteobacteria(100);c__Alphaproteobacteria(100);o__Rhizobiales(100);f__Bradyrhizobiaceae(100);unclassified;unclassified;
ICSZ4EG01CG8US	k__Bacteria(100);p__Proteobacteria(100);c__Alphaproteobacteria(100);o__Sphingomonadales(100);f__Sphingomonadaceae(100);g__Sphingomonas(99);s__Caulobacterleidyi(99);
ICSZ4EG01C07F4	k__Bacteria(100);p__Proteobacteria(100);c__Betaproteobacteria(100);o__Burkholderiales(99);f__Burkholderiaceae(87);unclassified;unclassified;
ICSZ4EG01CW0LB	k__Bacteria(100);p__Proteobacteria(100);c__Betaproteobacteria(98);o__Burkholderiales(98);unclassified;unclassified;unclassified;
ICSZ4EG01A45EE	k__Bacteria(100);p__Proteobacteria(100);c__Betaproteobacteria(100);o__Burkholderiales(100);f__Burkholderiaceae(96);g__Ralstonia(88);unclassified;
ICSZ4EG01APSO6	k__Bacteria(100);p__Bacteroidetes(100);c__Sphingobacteria(100);o__Sphingobacteriales(100);f__Sphingobacteriaceae(100);g__Pedobacter(100);s__Pedobactercryoconiti(85);
ICSZ4EG01CV2IZ	k__Bacteria(100);p__Proteobacteria(100);c__Betaproteobacteria(100);o__Burkholderiales(100);f__Burkholderiaceae(95);g__Ralstonia(90);unclassified;
ICSZ4EG01EZTNG	k__Bacteria(100);p__Bacteroidetes(100);c__Flavobacteria(100);o__Flavobacteriales(100);f__Flavobacteriaceae(100);unclassified;unclassified;
ICSZ4EG01ER7ZX	k__Bacteria(100);p__Proteobacteria(100);c__Betaproteobacteria(100);o__Burkholderiales(100);f__Burkholderiaceae(100);g__Ralstonia(100);unclassified;
ICSZ4EG01EOBHC	k__Bacteria(100);p__Firmicutes(100);c__Bacilli(100);o__Bacillales(100);f__Staphylococcaceae(100);g__Staphylococcus(100);s__Staphylococcushomini(99);
ICSZ4EG01EJI0Y	k__Bacteria(100);p__Proteobacteria(100);c__Betaproteobacteria(100);o__Burkholderiales(100);f__Comamonadaceae(100);g__Diaphorobacter(83);unclassified;
ICSZ4EG01EFXEQ	k__Bacteria(100);p__Proteobacteria(100);c__Alphaproteobacteria(100);o__Sphingomonadales(100);f__Sphingomonadaceae(100);g__Sphingomonas(100);s__Caulobacterleidyi(100);
ICSZ4EG01ECBH1	k__Bacteria(100);p__Actinobacteria(100);c__Actinobacteria(100);o__Actinomycetales(100);f__Corynebacteriaceae(100);g__Corynebacterium(100);s__Corynebacteriumtuberculostearicu(90);
ICSZ4EG01EAA0M	k__Bacteria(100);p__Proteobacteria(100);c__Alphaproteobacteria(100);o__Sphingomonadales(100);f__Sphingomonadaceae(100);g__Sphingomonas(100);s__Caulobacterleidyi(100);
ICSZ4EG01DZW4M	k__Bacteria(100);p__Proteobacteria(100);c__Betaproteobacteria(100);o__Burkholderiales(99);unclassified;unclassified;unclassified;
ICSZ4EG01CU5JI	k__Bacteria(100);p__Proteobacteria(100);c__Betaproteobacteria(98);o__Burkholderiales(96);unclassified;unclassified;unclassified;
ICSZ4EG01DX3IA	k__Bacteria(100);p__Proteobacteria(100);c__Alphaproteobacteria(100);o__Sphingomonadales(100);f__Sphingomonadaceae(100);g__Sphingomonas(99);s__Caulobacterleidyi(99);
ICSZ4EG01BP5DH	k__Bacteria(100);p__Proteobacteria(100);c__Alphaproteobacteria(95);o__Sphingomonadales(95);f__Sphingomonadaceae(95);g__Sphingomonas(94);s__Caulobacterleidyi(94);
ICSZ4EG01DR9IH	k__Bacteria(100);p__Proteobacteria(100);c__Alphaproteobacteria(100);o__Sphingomonadales(100);f__Sphingomonadaceae(100);g__Sphingomonas(100);s__Caulobacterleidyi(100);
ICSZ4EG01DPQIF	k__Bacteria(100);p__Proteobacteria(100);c__Alphaproteobacteria(100);o__Sphingomonadales(100);f__Sphingomonadaceae(100);g__Sphingomonas(100);s__Caulobacterleidyi(100);
ICSZ4EG01DP7YA	k__Bacteria(100);p__Proteobacteria(100);c__Alphaproteobacteria(100);o__Sphingomonadales(100);f__Sphingomonadaceae(100);g__Sphingomonas(99);s__Caulobacterleidyi(99);
ICSZ4EG02I8LYQ	k__Bacteria(100);p__Proteobacteria(100);c__Betaproteobacteria(100);o__Burkholderiales(100);f__Burkholderiaceae(96);g__Ralstonia(90);unclassified;
ICSZ4EG01DI9FV	k__Bacteria(100);p__Proteobacteria(100);c__Alphaproteobacteria(100);o__Sphingomonadales(100);f__Erythrobacteraceae(99);g__Lutibacterium(89);unclassified;
ICSZ4EG01DADMN	k__Bacteria(100);p__Proteobacteria(100);c__Betaproteobacteria(100);o__Burkholderiales(100);f__Comamonadaceae(100);g__Acidovorax(85);unclassified;
ICSZ4EG01D6Z0H	k__Bacteria(100);p__Proteobacteria(100);c__Alphaproteobacteria(100);o__Sphingomonadales(100);f__Sphingomonadaceae(100);g__Sphingomonas(95);s__Caulobacterleidyi(95);
ICSZ4EG01D5FZS	k__Bacteria(100);p__Proteobacteria(100);c__Alphaproteobacteria(100);o__Sphingomonadales(99);f__Sphingomonadaceae(98);g__Sphingomonas(98);s__Caulobacterleidyi(98);
ICSZ4EG01D52FX	k__Bacteria(100);p__Proteobacteria(100);c__Alphaproteobacteria(100);o__Sphingomonadales(100);f__Sphingomonadaceae(100);g__Sphingomonas(99);s__Caulobacterleidyi(99);
ICSZ4EG01D4VF5	k__Bacteria(100);p__Proteobacteria(100);c__Betaproteobacteria(99);o__Burkholderiales(99);unclassified;unclassified;unclassified;
ICSZ4EG01CYYHU	k__Bacteria(100);p__Proteobacteria(100);c__Alphaproteobacteria(100);o__Sphingomonadales(100);f__Sphingomonadaceae(100);g__Sphingomonas(100);s__Caulobacterleidyi(100);
ICSZ4EG01CXTN6	k__Bacteria(100);p__Proteobacteria(100);c__Alphaproteobacteria(100);o__Sphingomonadales(100);f__Sphingomonadaceae(100);g__Sphingomonas(100);s__Caulobacterleidyi(99);
ICSZ4EG01CSBMF	k__Bacteria(100);p__Proteobacteria(100);c__Alphaproteobacteria(100);o__Sphingomonadales(100);f__Sphingomonadaceae(100);g__Sphingomonas(100);s__Caulobacterleidyi(100);
ICSZ4EG01CRBPR	k__Bacteria(100);p__Proteobacteria(100);c__Alphaproteobacteria(100);o__Sphingomonadales(100);f__Sphingomonadaceae(100);g__Sphingomonas(100);s__Caulobacterleidyi(100);
ICSZ4EG01CQ4JV	k__Bacteria(100);p__Proteobacteria(100);c__Alphaproteobacteria(100);o__Sphingomonadales(100);f__Sphingomonadaceae(99);g__Sphingomonas(98);s__Caulobacterleidyi(98);
ICSZ4EG01CP7GP	k__Bacteria(100);p__Proteobacteria(99);c__Betaproteobacteria(99);o__Burkholderiales(99);f__Burkholderiaceae(99);g__Ralstonia(97);unclassified;
ICSZ4EG01COMRD	k__Bacteria(100);p__Proteobacteria(100);c__Betaproteobacteria(100);o__Burkholderiales(100);f__Burkholderiaceae(99);g__Ralstonia(98);unclassified;
ICSZ4EG01CAJ06	k__Bacteria(100);p__Proteobacteria(100);c__Alphaproteobacteria(100);o__Sphingomonadales(100);f__Sphingomonadaceae(100);g__Sphingomonas(92);s__Caulobacterleidyi(92);
ICSZ4EG01C884U	k__Bacteria(100);p__Proteobacteria(100);c__Alphaproteobacteria(100);o__Sphingomonadales(100);f__Sphingomonadaceae(100);g__Sphingomonas(98);s__Caulobacterleidyi(98);
ICSZ4EG01C6TQF	k__Bacteria(100);p__Proteobacteria(100);c__Alphaproteobacteria(100);o__Sphingomonadales(100);f__Sphingomonadaceae(100);g__Sphingomonas(100);s__Caulobacterleidyi(100);
ICSZ4EG01C2J7X	k__Bacteria(100);p__Proteobacteria(100);c__Alphaproteobacteria(100);o__Sphingomonadales(100);f__Sphingomonadaceae(100);g__Sphingomonas(89);s__Caulobacterleidyi(89);
ICSZ4EG01BZ6OD	k__Bacteria(100);p__Proteobacteria(100);c__Betaproteobacteria(100);o__Burkholderiales(98);unclassified;unclassified;unclassified;
ICSZ4EG01BOQ5H	k__Bacteria(100);p__Proteobacteria(100);c__Alphaproteobacteria(100);o__Sphingomonadales(100);f__Sphingomonadaceae(100);g__Sphingomonas(100);s__Caulobacterleidyi(100);
ICSZ4EG01BO6RB	k__Bacteria(100);p__Proteobacteria(98);c__Alphaproteobacteria(98);unclassified;unclassified;unclassified;unclassified;
ICSZ4EG01BM84L	k__Bacteria(100);p__Proteobacteria(100);c__Alphaproteobacteria(100);o__Sphingomonadales(100);f__Sphingomonadaceae(100);g__Sphingomonas(98);s__Caulobacterleidyi(98);
ICSZ4EG02GQJ4P	k__Bacteria(100);p__Proteobacteria(100);c__Betaproteobacteria(100);o__Burkholderiales(99);unclassified;unclassified;unclassified;
ICSZ4EG01BLQEL	k__Bacteria(100);p__Actinobacteria(100);c__Actinobacteria(100);o__Actinomycetales(100);f__Microbacteriaceae(100);g__Leucobacter(100);s__Leucobacterkomagata(100);
ICSZ4EG01BDCTK	k__Bacteria(100);p__Proteobacteria(100);c__Betaproteobacteria(100);o__Burkholderiales(100);f__Burkholderiaceae(100);g__Ralstonia(99);unclassified;
ICSZ4EG01BCRFB	k__Bacteria(100);p__Proteobacteria(100);c__Alphaproteobacteria(100);o__Sphingomonadales(100);f__Sphingomonadaceae(100);g__Sphingomonas(100);s__Caulobacterleidyi(100);
ICSZ4EG01B74N3	k__Bacteria(100);p__Proteobacteria(100);c__Alphaproteobacteria(100);o__Sphingomonadales(100);f__Sphingomonadaceae(100);g__Sphingomonas(99);s__Caulobacterleidyi(99);
ICSZ4EG01AYDKA	k__Bacteria(100);p__Proteobacteria(100);c__Alphaproteobacteria(100);o__Sphingomonadales(100);f__Sphingomonadaceae(100);g__Sphingomonas(99);s__Caulobacterleidyi(99);
ICSZ4EG01AWXTA	k__Bacteria(100);p__Firmicutes(100);c__Bacilli(100);o__Bacillales(100);f__Staphylococcaceae(100);g__Staphylococcus(100);s__Staphylococcusepidermidi(99);
ICSZ4EG01APS63	k__Bacteria(100);p__Proteobacteria(100);c__Alphaproteobacteria(100);o__Sphingomonadales(100);f__Sphingomonadaceae(100);g__Sphingomonas(98);s__Caulobacterleidyi(98);
ICSZ4EG01ALK4F	k__Bacteria(100);p__Proteobacteria(100);c__Betaproteobacteria(100);o__Burkholderiales(92);f__Burkholderiaceae(90);unclassified;unclassified;
ICSZ4EG01A8MG4	k__Bacteria(100);p__Proteobacteria(100);c__Alphaproteobacteria(100);o__Sphingomonadales(100);f__Sphingomonadaceae(100);g__Sphingomonas(99);s__Caulobacterleidyi(98);
ICSZ4EG01A877U	k__Bacteria(100);p__Proteobacteria(100);c__Betaproteobacteria(100);o__Burkholderiales(100);f__Burkholderiaceae(100);g__Ralstonia(100);unclassified;
ICSZ4EG01A7EAT	k__Bacteria(100);p__Proteobacteria(100);c__Betaproteobacteria(100);o__Burkholderiales(100);f__Burkholderiaceae(100);g__Ralstonia(98);unclassified;
ICSZ4EG01A30US	k__Bacteria(100);p__Proteobacteria(99);c__Alphaproteobacteria(99);o__Sphingomonadales(99);f__Sphingomonadaceae(99);g__Sphingomonas(98);s__Caulobacterleidyi(98);
ICSZ4EG01A2FL5	k__Bacteria(100);p__Firmicutes(100);c__Bacilli(100);o__Lactobacillales(100);f__Streptococcaceae(100);g__Streptococcus(100);unclassified;
ICSZ4EG01BE0N3	k__Bacteria(100);p__Proteobacteria(100);c__Betaproteobacteria(100);o__Rhodocyclales(80);f__Rhodocyclaceae(80);unclassified;unclassified;
ICSZ4EG01AKNWZ	k__Bacteria(100);p__Proteobacteria(100);c__Alphaproteobacteria(100);o__Sphingomonadales(100);f__Sphingomonadaceae(100);g__Sphingomonas(100);s__Caulobacterleidyi(99);
ICSZ4EG01ER4PA	k__Bacteria(100);p__Proteobacteria(100);c__Alphaproteobacteria(100);o__Rhizobiales(100);f__Bradyrhizobiaceae(100);unclassified;unclassified;
ICSZ4EG01EO5Q3	k__Bacteria(100);p__Proteobacteria(100);c__Betaproteobacteria(100);o__Burkholderiales(100);f__Burkholderiaceae(100);g__Ralstonia(98);unclassified;
ICSZ4EG01EN28B	k__Bacteria(100);p__Proteobacteria(99);c__Alphaproteobacteria(99);o__Sphingomonadales(99);f__Sphingomonadaceae(98);g__Sphingomonas(98);s__Caulobacterleidyi(98);
ICSZ4EG01CL192	k__Bacteria(100);p__Proteobacteria(100);c__Alphaproteobacteria(100);o__Sphingomonadales(87);f__Sphingomonadaceae(87);g__Sphingomonas(87);s__Caulobacterleidyi(87);
ICSZ4EG01EIG2J	k__Bacteria(100);p__Proteobacteria(100);c__Alphaproteobacteria(100);o__Sphingomonadales(100);f__Sphingomonadaceae(100);g__Sphingomonas(99);s__Caulobacterleidyi(99);
ICSZ4EG02H39YJ	k__Bacteria(100);p__Proteobacteria(100);c__Betaproteobacteria(100);o__Burkholderiales(100);unclassified;unclassified;unclassified;
ICSZ4EG01DZAQW	k__Bacteria(100);p__Proteobacteria(100);c__Alphaproteobacteria(100);o__Sphingomonadales(100);f__Sphingomonadaceae(100);g__Sphingomonas(99);s__Caulobacterleidyi(98);
ICSZ4EG01DZ8JG	k__Bacteria(100);p__Proteobacteria(99);c__Alphaproteobacteria(99);o__Sphingomonadales(99);f__Sphingomonadaceae(98);g__Sphingomonas(96);s__Caulobacterleidyi(96);
ICSZ4EG01D1IWX	k__Bacteria(100);p__Proteobacteria(100);c__Betaproteobacteria(100);o__Burkholderiales(100);unclassified;unclassified;unclassified;
ICSZ4EG01DW32E	k__Bacteria(100);p__Proteobacteria(100);c__Betaproteobacteria(100);o__Burkholderiales(100);f__Burkholderiaceae(100);g__Cupriavidus(99);unclassified;
ICSZ4EG01D45XI	k__Bacteria(100);p__Firmicutes(100);c__Clostridia(100);o__Clostridiales(100);f__Ruminococcaceae(100);g__Oscillospira(100);unclassified;
ICSZ4EG01D1LLG	k__Bacteria(100);p__Firmicutes(100);c__Bacilli(100);o__Bacillales(100);f__Bacillaceae(100);g__Bacillus(100);s__Bacillusflexu(100);
ICSZ4EG01CS3CC	k__Bacteria(100);p__Proteobacteria(100);c__Alphaproteobacteria(100);o__Sphingomonadales(100);f__Sphingomonadaceae(100);g__Sphingomonas(100);s__Caulobacterleidyi(100);
ICSZ4EG01CRHXC	k__Bacteria(100);p__Proteobacteria(100);c__Alphaproteobacteria(100);o__Sphingomonadales(100);f__Sphingomonadaceae(100);g__Sphingomonas(100);s__Caulobacterleidyi(100);
ICSZ4EG01COVDP	k__Bacteria(100);p__Proteobacteria(100);c__Alphaproteobacteria(100);o__Sphingomonadales(100);f__Sphingomonadaceae(100);g__Sphingomonas(100);s__Caulobacterleidyi(100);
ICSZ4EG01CM330	k__Bacteria(100);p__Proteobacteria(100);c__Alphaproteobacteria(100);o__Sphingomonadales(100);f__Sphingomonadaceae(100);g__Sphingomonas(99);s__Caulobacterleidyi(99);
ICSZ4EG01CM178	k__Bacteria(100);p__Proteobacteria(100);c__Alphaproteobacteria(100);o__Sphingomonadales(100);f__Sphingomonadaceae(100);g__Sphingomonas(97);s__Caulobacterleidyi(96);
ICSZ4EG01CIXUZ	k__Bacteria(100);p__Proteobacteria(100);c__Alphaproteobacteria(100);o__Sphingomonadales(100);f__Sphingomonadaceae(100);g__Sphingomonas(100);s__Caulobacterleidyi(100);
ICSZ4EG01BBLI4	k__Bacteria(100);p__Proteobacteria(100);c__Alphaproteobacteria(100);o__Sphingomonadales(100);f__Sphingomonadaceae(99);g__Sphingomonas(99);s__Caulobacterleidyi(99);
ICSZ4EG01B67TM	k__Bacteria(100);p__Proteobacteria(100);c__Alphaproteobacteria(100);o__Sphingomonadales(100);f__Sphingomonadaceae(100);g__Sphingomonas(100);s__Caulobacterleidyi(100);
ICSZ4EG01B5TKK	k__Bacteria(100);p__Proteobacteria(100);c__Alphaproteobacteria(100);o__Sphingomonadales(100);f__Sphingomonadaceae(100);g__Sphingomonas(88);s__Caulobacterleidyi(88);
ICSZ4EG01AXMDO	k__Bacteria(100);p__Proteobacteria(100);c__Alphaproteobacteria(100);o__Sphingomonadales(100);f__Sphingomonadaceae(100);g__Sphingomonas(100);s__Caulobacterleidyi(100);
ICSZ4EG01A356B	k__Bacteria(100);p__Proteobacteria(100);c__Alphaproteobacteria(100);o__Sphingomonadales(100);f__Sphingomonadaceae(100);g__Sphingomonas(98);s__Caulobacterleidyi(97);
ICSZ4EG01EWYE5	k__Bacteria(100);p__Proteobacteria(100);c__Betaproteobacteria(100);o__Rhodocyclales(100);f__Rhodocyclaceae(100);g__Dechloromonas(99);unclassified;
ICSZ4EG01BBZIP	k__Bacteria(100);p__Proteobacteria(100);c__Alphaproteobacteria(100);o__Sphingomonadales(100);f__Sphingomonadaceae(99);g__Sphingomonas(96);s__Caulobacterleidyi(96);
ICSZ4EG01ESQ8A	k__Bacteria(100);p__Proteobacteria(100);c__Alphaproteobacteria(100);o__Sphingomonadales(100);f__Sphingomonadaceae(100);g__Sphingomonas(100);s__Caulobacterleidyi(100);
ICSZ4EG01EBK96	k__Bacteria(100);p__Proteobacteria(100);c__Alphaproteobacteria(100);o__Sphingomonadales(100);f__Sphingomonadaceae(100);g__Sphingomonas(98);s__Caulobacterleidyi(98);
ICSZ4EG01DV93L	k__Bacteria(100);p__Proteobacteria(100);c__Alphaproteobacteria(100);o__Sphingomonadales(100);f__Sphingomonadaceae(100);g__Sphingomonas(100);s__Caulobacterleidyi(99);
ICSZ4EG01DTSGL	k__Bacteria(100);p__Proteobacteria(100);c__Alphaproteobacteria(100);o__Sphingomonadales(100);f__Sphingomonadaceae(100);g__Sphingomonas(97);s__Caulobacterleidyi(97);
ICSZ4EG01DS774	k__Bacteria(100);p__Proteobacteria(100);c__Alphaproteobacteria(100);o__Sphingomonadales(100);f__Sphingomonadaceae(100);g__Sphingomonas(99);s__Caulobacterleidyi(99);
ICSZ4EG01DO37M	k__Bacteria(100);p__Proteobacteria(100);c__Alphaproteobacteria(100);o__Sphingomonadales(100);f__Sphingomonadaceae(100);g__Sphingomonas(99);s__Caulobacterleidyi(98);
ICSZ4EG01DKMWX	k__Bacteria(100);p__Proteobacteria(100);c__Betaproteobacteria(96);o__Burkholderiales(96);unclassified;unclassified;unclassified;
ICSZ4EG01DIWI4	k__Bacteria(100);p__Proteobacteria(100);c__Alphaproteobacteria(100);o__Sphingomonadales(100);f__Sphingomonadaceae(100);g__Sphingomonas(100);s__Caulobacterleidyi(100);
ICSZ4EG01DCKRF	k__Bacteria(100);p__Proteobacteria(100);c__Alphaproteobacteria(100);o__Sphingomonadales(100);f__Sphingomonadaceae(100);g__Sphingomonas(97);s__Caulobacterleidyi(97);
ICSZ4EG01DBZ0M	k__Bacteria(100);p__Proteobacteria(100);c__Alphaproteobacteria(100);o__Sphingomonadales(100);f__Sphingomonadaceae(100);g__Sphingomonas(98);s__Caulobacterleidyi(98);
ICSZ4EG01D70U3	k__Bacteria(100);p__Proteobacteria(100);c__Alphaproteobacteria(100);o__Sphingomonadales(100);f__Sphingomonadaceae(99);g__Sphingomonas(98);s__Caulobacterleidyi(98);
ICSZ4EG01D6SQG	k__Bacteria(100);p__Proteobacteria(100);c__Alphaproteobacteria(100);o__Sphingomonadales(100);f__Sphingomonadaceae(100);g__Sphingomonas(99);s__Caulobacterleidyi(99);
ICSZ4EG01D3ASH	k__Bacteria(100);p__Proteobacteria(100);c__Gammaproteobacteria(100);o__Xanthomonadales(100);f__Xanthomonadaceae(100);g__Stenotrophomonas(97);unclassified;
ICSZ4EG01CVO0H	k__Bacteria(100);p__Proteobacteria(100);c__Alphaproteobacteria(100);o__Sphingomonadales(100);f__Sphingomonadaceae(100);g__Sphingomonas(100);s__Caulobacterleidyi(100);
ICSZ4EG01CU4SR	k__Bacteria(100);p__Proteobacteria(100);c__Alphaproteobacteria(100);o__Sphingomonadales(100);f__Sphingomonadaceae(100);g__Sphingomonas(100);s__Caulobacterleidyi(100);
ICSZ4EG01CR8D6	k__Bacteria(100);p__Proteobacteria(100);c__Alphaproteobacteria(100);o__Sphingomonadales(100);f__Sphingomonadaceae(100);g__Sphingomonas(100);s__Caulobacterleidyi(100);
ICSZ4EG01CJBDU	k__Bacteria(100);p__Proteobacteria(100);c__Betaproteobacteria(100);o__Burkholderiales(100);f__Burkholderiaceae(99);g__Ralstonia(97);unclassified;
ICSZ4EG01CGHC4	k__Bacteria(100);p__Proteobacteria(100);c__Betaproteobacteria(100);o__Burkholderiales(100);f__Comamonadaceae(100);g__Acidovorax(98);unclassified;
ICSZ4EG01CBZJU	k__Bacteria(100);p__Proteobacteria(100);c__Alphaproteobacteria(100);o__Sphingomonadales(100);f__Sphingomonadaceae(100);g__Sphingomonas(100);s__Caulobacterleidyi(100);
ICSZ4EG01C649P	k__Bacteria(100);p__Proteobacteria(100);c__Alphaproteobacteria(100);o__Sphingomonadales(100);f__Sphingomonadaceae(100);g__Sphingomonas(100);s__Caulobacterleidyi(99);
ICSZ4EG01C0KQ6	k__Bacteria(100);p__Proteobacteria(100);c__Alphaproteobacteria(100);o__Sphingomonadales(100);f__Sphingomonadaceae(100);g__Sphingomonas(98);s__Caulobacterleidyi(98);
ICSZ4EG01BUI30	k__Bacteria(100);p__Proteobacteria(100);c__Alphaproteobacteria(100);o__Sphingomonadales(100);f__Sphingomonadaceae(100);g__Sphingomonas(100);s__Caulobacterleidyi(100);
ICSZ4EG01BN59E	k__Bacteria(100);p__Proteobacteria(100);c__Betaproteobacteria(100);o__Burkholderiales(100);f__Burkholderiaceae(100);g__Ralstonia(100);unclassified;
ICSZ4EG01BJOOC	k__Bacteria(100);p__Proteobacteria(100);c__Betaproteobacteria(99);o__Burkholderiales(99);f__Burkholderiaceae(99);g__Ralstonia(96);unclassified;
ICSZ4EG01BCG0J	k__Bacteria(100);p__Proteobacteria(100);c__Alphaproteobacteria(100);o__Sphingomonadales(100);f__Sphingomonadaceae(100);g__Sphingomonas(97);s__Caulobacterleidyi(97);
ICSZ4EG01B1CLV	k__Bacteria(100);p__Proteobacteria(100);c__Alphaproteobacteria(100);o__Rhizobiales(100);f__Phyllobacteriaceae(99);unclassified;unclassified;
ICSZ4EG01AZC4L	k__Bacteria(100);p__Proteobacteria(100);c__Alphaproteobacteria(100);o__Sphingomonadales(100);f__Sphingomonadaceae(100);g__Sphingomonas(97);s__Caulobacterleidyi(97);
ICSZ4EG01AY2BE	k__Bacteria(100);p__Tenericutes(80);unclassified;unclassified;unclassified;unclassified;unclassified;
ICSZ4EG01AXAOT	k__Bacteria(100);p__Proteobacteria(100);c__Alphaproteobacteria(100);o__Sphingomonadales(100);f__Sphingomonadaceae(100);g__Sphingomonas(99);s__Caulobacterleidyi(99);
ICSZ4EG01AV7I5	k__Bacteria(100);p__Proteobacteria(100);c__Alphaproteobacteria(100);o__Sphingomonadales(100);f__Sphingomonadaceae(100);g__Sphingomonas(100);s__Caulobacterleidyi(100);
ICSZ4EG01AUPDR	k__Bacteria(100);p__Proteobacteria(100);c__Alphaproteobacteria(100);o__Sphingomonadales(100);f__Sphingomonadaceae(100);g__Sphingomonas(97);s__Caulobacterleidyi(97);
ICSZ4EG01APBDF	k__Bacteria(100);p__Proteobacteria(100);c__Alphaproteobacteria(100);o__Sphingomonadales(100);f__Sphingomonadaceae(100);g__Sphingomonas(100);s__Caulobacterleidyi(99);
ICSZ4EG01ALF0M	k__Bacteria(100);p__Proteobacteria(100);c__Betaproteobacteria(100);o__Burkholderiales(100);f__Comamonadaceae(100);g__Diaphorobacter(100);unclassified;
ICSZ4EG01AKXCD	k__Bacteria(100);p__Proteobacteria(100);c__Alphaproteobacteria(100);o__Sphingomonadales(100);f__Sphingomonadaceae(100);g__Sphingomonas(99);s__Caulobacterleidyi(99);
ICSZ4EG01AK0KP	k__Bacteria(100);p__Proteobacteria(100);c__Alphaproteobacteria(100);o__Sphingomonadales(100);f__Sphingomonadaceae(100);g__Sphingomonas(88);s__Caulobacterleidyi(86);
ICSZ4EG01BHBDX	k__Bacteria(100);p__Actinobacteria(100);c__Actinobacteria(100);o__Actinomycetales(100);f__Corynebacteriaceae(100);g__Corynebacterium(100);unclassified;
ICSZ4EG01ETM6G	k__Bacteria(100);p__Proteobacteria(100);c__Alphaproteobacteria(100);o__Sphingomonadales(100);f__Sphingomonadaceae(100);g__Sphingomonas(100);s__Caulobacterleidyi(100);
ICSZ4EG01DANGC	k__Bacteria(100);p__Actinobacteria(100);c__Actinobacteria(100);o__Actinomycetales(100);f__Corynebacteriaceae(100);g__Corynebacterium(100);unclassified;
ICSZ4EG01C4L6A	k__Bacteria(100);p__Proteobacteria(100);c__Alphaproteobacteria(100);o__Sphingomonadales(100);f__Sphingomonadaceae(100);g__Sphingomonas(100);s__Caulobacterleidyi(100);
ICSZ4EG01C0NZF	k__Bacteria(100);p__Actinobacteria(100);c__Actinobacteria(100);o__Actinomycetales(100);f__Corynebacteriaceae(100);g__Corynebacterium(100);unclassified;
ICSZ4EG01EN9H0	k__Bacteria(100);p__Actinobacteria(100);c__Actinobacteria(100);o__Actinomycetales(100);f__Corynebacteriaceae(99);g__Corynebacterium(99);unclassified;
ICSZ4EG01C39M1	k__Bacteria(100);p__Proteobacteria(100);c__Betaproteobacteria(100);o__Burkholderiales(100);f__Burkholderiaceae(95);g__Ralstonia(91);unclassified;
ICSZ4EG01DCEOG	k__Bacteria(100);p__Proteobacteria(100);c__Betaproteobacteria(99);o__Burkholderiales(97);unclassified;unclassified;unclassified;
ICSZ4EG01D14Z6	k__Bacteria(100);p__Proteobacteria(100);c__Betaproteobacteria(100);o__Burkholderiales(100);f__Comamonadaceae(100);g__Diaphorobacter(92);unclassified;
ICSZ4EG01CL6DU	k__Bacteria(100);p__Proteobacteria(100);c__Alphaproteobacteria(100);o__Sphingomonadales(100);f__Sphingomonadaceae(100);g__Sphingomonas(100);s__Caulobacterleidyi(100);
ICSZ4EG01C8JGT	k__Bacteria(100);p__Proteobacteria(100);c__Alphaproteobacteria(100);o__Sphingomonadales(100);f__Sphingomonadaceae(100);g__Sphingomonas(99);s__Caulobacterleidyi(99);
ICSZ4EG01BMZBZ	k__Bacteria(100);p__Proteobacteria(100);c__Alphaproteobacteria(100);o__Sphingomonadales(100);f__Sphingomonadaceae(100);g__Sphingomonas(100);s__Caulobacterleidyi(99);
ICSZ4EG01A7KC1	k__Bacteria(100);p__Proteobacteria(100);c__Alphaproteobacteria(100);o__Sphingomonadales(100);f__Sphingomonadaceae(100);g__Sphingomonas(100);s__Caulobacterleidyi(100);
ICSZ4EG01C9IVD	k__Bacteria(100);p__Proteobacteria(100);c__Alphaproteobacteria(94);o__Sphingomonadales(94);f__Sphingomonadaceae(94);g__Sphingomonas(94);s__Caulobacterleidyi(94);
ICSZ4EG01EVKQV	k__Bacteria(100);p__Actinobacteria(100);c__Actinobacteria(100);o__Actinomycetales(100);f__Corynebacteriaceae(100);g__Corynebacterium(100);unclassified;
ICSZ4EG02GOLUU	k__Bacteria(100);p__Proteobacteria(100);c__Betaproteobacteria(100);o__Burkholderiales(98);f__Burkholderiaceae(89);g__Ralstonia(82);unclassified;
ICSZ4EG01EQ50U	k__Bacteria(100);p__Proteobacteria(100);c__Alphaproteobacteria(100);o__Sphingomonadales(100);f__Sphingomonadaceae(100);g__Sphingobium(87);unclassified;
ICSZ4EG01EKOKG	k__Bacteria(100);p__Proteobacteria(100);c__Betaproteobacteria(100);o__Burkholderiales(100);f__Burkholderiaceae(100);g__Ralstonia(99);unclassified;
ICSZ4EG01EHXLO	k__Bacteria(100);p__Proteobacteria(100);c__Alphaproteobacteria(100);o__Sphingomonadales(100);f__Sphingomonadaceae(98);g__Sphingomonas(98);s__Caulobacterleidyi(97);
ICSZ4EG01B38BU	k__Bacteria(100);p__Proteobacteria(100);c__Betaproteobacteria(100);o__Burkholderiales(97);unclassified;unclassified;unclassified;
ICSZ4EG01EG367	k__Bacteria(100);p__Bacteroidetes(98);c__Bacteroidia(97);o__Bacteroidales(97);unclassified;unclassified;unclassified;
ICSZ4EG01EDYI7	k__Bacteria(100);p__Proteobacteria(100);c__Betaproteobacteria(100);o__Burkholderiales(100);f__Burkholderiaceae(98);g__Ralstonia(98);unclassified;
ICSZ4EG01ECO2I	k__Bacteria(100);p__Proteobacteria(100);c__Alphaproteobacteria(100);o__Sphingomonadales(100);f__Sphingomonadaceae(100);g__Sphingomonas(99);s__Caulobacterleidyi(99);
ICSZ4EG01EAZ2H	k__Bacteria(100);p__Proteobacteria(99);c__Betaproteobacteria(97);o__Burkholderiales(96);unclassified;unclassified;unclassified;
ICSZ4EG01EAQPJ	k__Bacteria(100);p__Actinobacteria(100);c__Actinobacteria(100);o__Actinomycetales(100);f__Corynebacteriaceae(100);g__Corynebacterium(100);unclassified;
ICSZ4EG01DZ4L8	k__Bacteria(100);p__Proteobacteria(100);c__Alphaproteobacteria(100);o__Sphingomonadales(100);f__Sphingomonadaceae(100);g__Sphingomonas(98);s__Caulobacterleidyi(98);
ICSZ4EG01DYRWG	k__Bacteria(100);p__Actinobacteria(100);c__Actinobacteria(100);o__Actinomycetales(100);f__Corynebacteriaceae(100);g__Corynebacterium(100);s__Corynebacteriumaurimucosu(95);
ICSZ4EG02FSLHO	k__Bacteria(100);p__Proteobacteria(100);c__Betaproteobacteria(98);o__Burkholderiales(94);unclassified;unclassified;unclassified;
ICSZ4EG01DTJY1	k__Bacteria(100);p__Proteobacteria(100);c__Betaproteobacteria(100);o__Burkholderiales(99);f__Comamonadaceae(93);unclassified;unclassified;
ICSZ4EG01DSP30	k__Bacteria(100);p__Actinobacteria(100);c__Actinobacteria(100);o__Actinomycetales(100);f__Corynebacteriaceae(98);g__Corynebacterium(98);unclassified;
ICSZ4EG01ATB7F	k__Bacteria(100);p__Proteobacteria(100);c__Betaproteobacteria(100);o__Burkholderiales(100);f__Burkholderiaceae(96);g__Ralstonia(91);unclassified;
ICSZ4EG01DM7YZ	k__Bacteria(100);p__Proteobacteria(100);c__Alphaproteobacteria(100);o__Sphingomonadales(100);f__Sphingomonadaceae(100);g__Sphingomonas(97);s__Caulobacterleidyi(97);
ICSZ4EG01DM1DC	k__Bacteria(100);p__Actinobacteria(100);c__Actinobacteria(100);o__Actinomycetales(100);f__Corynebacteriaceae(99);g__Corynebacterium(99);unclassified;
ICSZ4EG01DJXRW	k__Bacteria(100);p__Proteobacteria(100);c__Alphaproteobacteria(99);o__Sphingomonadales(99);f__Sphingomonadaceae(99);g__Sphingomonas(98);s__Caulobacterleidyi(98);
ICSZ4EG01DGL7G	k__Bacteria(100);p__Proteobacteria(100);c__Alphaproteobacteria(100);o__Sphingomonadales(100);f__Sphingomonadaceae(100);g__Sphingomonas(100);s__Caulobacterleidyi(100);
ICSZ4EG01DB7LV	k__Bacteria(100);p__Proteobacteria(100);c__Betaproteobacteria(100);o__Burkholderiales(100);f__Comamonadaceae(99);g__Acidovorax(96);s__Acidovoraxcaen(89);
ICSZ4EG01DA0NQ	k__Bacteria(100);p__Proteobacteria(100);c__Alphaproteobacteria(100);o__Sphingomonadales(100);f__Sphingomonadaceae(100);g__Sphingomonas(99);s__Caulobacterleidyi(99);
ICSZ4EG01D815Z	k__Bacteria(100);p__Proteobacteria(98);c__Betaproteobacteria(94);o__Burkholderiales(92);unclassified;unclassified;unclassified;
ICSZ4EG01D6K1B	k__Bacteria(100);p__Proteobacteria(100);c__Betaproteobacteria(100);o__Burkholderiales(99);unclassified;unclassified;unclassified;
ICSZ4EG01D64PA	k__Bacteria(100);p__Actinobacteria(100);c__Actinobacteria(100);o__Actinomycetales(100);f__Corynebacteriaceae(100);g__Corynebacterium(100);unclassified;
ICSZ4EG01D4L08	k__Bacteria(100);p__Proteobacteria(100);c__Betaproteobacteria(100);o__Burkholderiales(100);unclassified;unclassified;unclassified;
ICSZ4EG01D3AJ1	k__Bacteria(100);p__Proteobacteria(100);c__Betaproteobacteria(100);o__Burkholderiales(100);f__Comamonadaceae(100);g__Acidovorax(95);s__Acidovoraxcaen(88);
ICSZ4EG02F2AWM	k__Bacteria(100);p__Proteobacteria(100);c__Betaproteobacteria(100);o__Burkholderiales(100);f__Comamonadaceae(92);g__Acidovorax(87);unclassified;
ICSZ4EG01D0W25	k__Bacteria(100);p__Proteobacteria(100);c__Alphaproteobacteria(100);o__Sphingomonadales(100);f__Sphingomonadaceae(100);g__Sphingomonas(100);s__Caulobacterleidyi(100);
ICSZ4EG01D0O72	k__Bacteria(100);p__Proteobacteria(100);c__Alphaproteobacteria(100);o__Sphingomonadales(100);f__Sphingomonadaceae(100);g__Sphingomonas(100);s__Caulobacterleidyi(100);
ICSZ4EG01CYU65	k__Bacteria(100);p__Proteobacteria(100);c__Alphaproteobacteria(100);o__Sphingomonadales(100);f__Sphingomonadaceae(100);g__Sphingomonas(100);s__Caulobacterleidyi(100);
ICSZ4EG01CYEB0	k__Bacteria(100);p__Proteobacteria(100);c__Alphaproteobacteria(100);o__Sphingomonadales(100);f__Sphingomonadaceae(100);g__Sphingomonas(100);s__Caulobacterleidyi(100);
ICSZ4EG01CY2Z3	k__Bacteria(100);p__Proteobacteria(100);c__Betaproteobacteria(100);o__Burkholderiales(100);f__Comamonadaceae(100);g__Acidovorax(82);unclassified;
ICSZ4EG01CXN5I	k__Bacteria(100);p__Proteobacteria(100);c__Betaproteobacteria(100);o__Burkholderiales(100);f__Comamonadaceae(100);unclassified;unclassified;
ICSZ4EG01DKAZA	k__Bacteria(100);p__Proteobacteria(100);c__Betaproteobacteria(100);o__Burkholderiales(100);f__Comamonadaceae(95);unclassified;unclassified;
ICSZ4EG01CS0B7	k__Bacteria(100);p__Proteobacteria(100);c__Alphaproteobacteria(100);o__Sphingomonadales(100);f__Sphingomonadaceae(100);g__Sphingomonas(98);s__Caulobacterleidyi(98);
ICSZ4EG01CR8XE	k__Bacteria(100);p__Proteobacteria(100);c__Gammaproteobacteria(100);o__Xanthomonadales(100);f__Xanthomonadaceae(100);g__Stenotrophomonas(100);unclassified;
ICSZ4EG01CPHD3	k__Bacteria(100);p__Proteobacteria(100);c__Alphaproteobacteria(100);o__Sphingomonadales(100);f__Sphingomonadaceae(100);g__Sphingomonas(100);s__Caulobacterleidyi(100);
ICSZ4EG01CP32D	k__Bacteria(100);p__Proteobacteria(100);c__Alphaproteobacteria(100);unclassified;unclassified;unclassified;unclassified;
ICSZ4EG01CNA9D	k__Bacteria(100);p__Firmicutes(100);c__Bacilli(100);o__Lactobacillales(100);f__Enterococcaceae(100);g__Enterococcus(100);s__Enterococcuscecoru(100);
ICSZ4EG01CKG6W	k__Bacteria(100);p__Bacteroidetes(97);c__Bacteroidia(96);o__Bacteroidales(96);unclassified;unclassified;unclassified;
ICSZ4EG01C9XAT	k__Bacteria(100);p__Proteobacteria(98);c__Betaproteobacteria(97);o__Burkholderiales(93);unclassified;unclassified;unclassified;
ICSZ4EG01C9BQW	k__Bacteria(100);p__Actinobacteria(100);c__Actinobacteria(100);o__Actinomycetales(100);f__Corynebacteriaceae(99);g__Corynebacterium(99);unclassified;
ICSZ4EG01C7LVH	k__Bacteria(100);p__Proteobacteria(91);c__Alphaproteobacteria(91);o__Sphingomonadales(91);f__Sphingomonadaceae(91);g__Sphingomonas(90);s__Caulobacterleidyi(90);
ICSZ4EG01C68YM	k__Bacteria(100);p__Proteobacteria(100);c__Alphaproteobacteria(100);o__Sphingomonadales(100);f__Sphingomonadaceae(100);g__Sphingomonas(99);s__Caulobacterleidyi(97);
ICSZ4EG01C5P9B	k__Bacteria(100);p__Proteobacteria(89);c__Alphaproteobacteria(89);o__Sphingomonadales(89);f__Sphingomonadaceae(89);g__Sphingomonas(86);s__Caulobacterleidyi(86);
ICSZ4EG01C3P25	k__Bacteria(100);p__Proteobacteria(100);c__Alphaproteobacteria(100);o__Sphingomonadales(100);f__Sphingomonadaceae(100);g__Sphingomonas(100);s__Caulobacterleidyi(99);
ICSZ4EG01BXHB1	k__Bacteria(100);p__Actinobacteria(100);c__Actinobacteria(100);o__Actinomycetales(100);f__Corynebacteriaceae(100);g__Corynebacterium(100);unclassified;
ICSZ4EG01BVQY1	k__Bacteria(100);p__Actinobacteria(100);c__Actinobacteria(100);o__Actinomycetales(100);f__Corynebacteriaceae(100);g__Corynebacterium(100);unclassified;
ICSZ4EG01BVHMV	k__Bacteria(100);p__Proteobacteria(100);c__Alphaproteobacteria(100);o__Sphingomonadales(100);f__Sphingomonadaceae(100);g__Sphingomonas(100);s__Caulobacterleidyi(100);
ICSZ4EG01BTR5B	k__Bacteria(100);p__Proteobacteria(100);c__Alphaproteobacteria(100);o__Rhizobiales(100);f__Bradyrhizobiaceae(99);g__Bosea(99);unclassified;
ICSZ4EG01BT346	k__Bacteria(100);p__Proteobacteria(100);c__Betaproteobacteria(99);o__Burkholderiales(99);unclassified;unclassified;unclassified;
ICSZ4EG01BSICQ	k__Bacteria(100);p__Proteobacteria(100);c__Betaproteobacteria(100);o__Rhodocyclales(100);f__Rhodocyclaceae(100);g__Zoogloea(100);unclassified;
ICSZ4EG01BQZVN	k__Bacteria(100);p__Proteobacteria(100);c__Alphaproteobacteria(100);o__Sphingomonadales(100);f__Sphingomonadaceae(100);g__Sphingomonas(95);s__Caulobacterleidyi(95);
ICSZ4EG01BKLKU	k__Bacteria(100);p__Proteobacteria(100);c__Alphaproteobacteria(100);o__Sphingomonadales(100);f__Sphingomonadaceae(100);g__Sphingomonas(99);s__Caulobacterleidyi(99);
ICSZ4EG01BGMJG	k__Bacteria(100);p__Proteobacteria(100);c__Betaproteobacteria(100);o__Burkholderiales(97);unclassified;unclassified;unclassified;
ICSZ4EG01BGDL0	k__Bacteria(100);p__Proteobacteria(100);c__Betaproteobacteria(100);o__Burkholderiales(100);f__Comamonadaceae(100);g__Diaphorobacter(91);unclassified;
ICSZ4EG01BFRBA	k__Bacteria(100);p__Proteobacteria(100);c__Betaproteobacteria(100);o__Burkholderiales(100);f__Comamonadaceae(100);g__Acidovorax(87);unclassified;
ICSZ4EG01BFE1Y	k__Bacteria(100);p__Proteobacteria(100);c__Betaproteobacteria(100);o__Burkholderiales(100);f__Burkholderiaceae(100);g__Ralstonia(100);unclassified;
ICSZ4EG01BB7S4	k__Bacteria(100);p__Proteobacteria(100);c__Alphaproteobacteria(100);o__Sphingomonadales(100);f__Sphingomonadaceae(100);g__Sphingomonas(98);s__Caulobacterleidyi(97);
ICSZ4EG01B8LQE	k__Bacteria(100);p__Actinobacteria(100);c__Actinobacteria(100);o__Actinomycetales(100);f__Corynebacteriaceae(99);g__Corynebacterium(99);unclassified;
ICSZ4EG01B7S3Q	k__Bacteria(100);p__Proteobacteria(100);c__Betaproteobacteria(100);o__Burkholderiales(100);f__Comamonadaceae(100);g__Acidovorax(90);unclassified;
ICSZ4EG01B6KSG	k__Bacteria(100);p__Proteobacteria(100);c__Betaproteobacteria(100);o__Burkholderiales(100);f__Burkholderiaceae(100);g__Ralstonia(100);unclassified;
ICSZ4EG01B52LZ	k__Bacteria(100);p__Proteobacteria(100);c__Betaproteobacteria(100);o__Burkholderiales(100);f__Comamonadaceae(100);g__Diaphorobacter(86);unclassified;
ICSZ4EG01B4877	k__Bacteria(100);p__Proteobacteria(98);c__Betaproteobacteria(95);o__Burkholderiales(94);unclassified;unclassified;unclassified;
ICSZ4EG01B1MNW	k__Bacteria(100);p__Actinobacteria(100);c__Actinobacteria(100);o__Actinomycetales(100);f__Corynebacteriaceae(100);g__Corynebacterium(100);unclassified;
ICSZ4EG01AXGT4	k__Bacteria(100);p__Proteobacteria(100);c__Alphaproteobacteria(100);o__Sphingomonadales(100);f__Sphingomonadaceae(100);g__Sphingomonas(100);s__Caulobacterleidyi(100);
ICSZ4EG01AS257	k__Bacteria(100);p__Proteobacteria(100);c__Alphaproteobacteria(100);o__Sphingomonadales(100);f__Sphingomonadaceae(100);g__Sphingomonas(100);s__Caulobacterleidyi(100);
ICSZ4EG01A9I3R	k__Bacteria(100);p__Proteobacteria(100);c__Alphaproteobacteria(100);o__Sphingomonadales(100);f__Sphingomonadaceae(100);g__Sphingomonas(96);s__Caulobacterleidyi(96);
ICSZ4EG01A9CVC	k__Bacteria(100);p__Proteobacteria(100);c__Betaproteobacteria(100);o__Burkholderiales(100);f__Burkholderiaceae(94);g__Ralstonia(89);unclassified;
ICSZ4EG01A8P0O	k__Bacteria(100);p__Proteobacteria(100);c__Alphaproteobacteria(100);o__Sphingomonadales(100);f__Sphingomonadaceae(100);g__Sphingomonas(99);s__Caulobacterleidyi(99);
ICSZ4EG01A79HQ	k__Bacteria(100);p__Proteobacteria(99);c__Alphaproteobacteria(98);o__Sphingomonadales(83);f__Sphingomonadaceae(83);g__Sphingomonas(81);s__Caulobacterleidyi(81);
ICSZ4EG01A4HKZ	k__Bacteria(100);p__Proteobacteria(100);c__Betaproteobacteria(100);o__Burkholderiales(100);f__Burkholderiaceae(97);g__Ralstonia(88);unclassified;
ICSZ4EG01A4IYA	k__Bacteria(100);p__Proteobacteria(100);c__Betaproteobacteria(100);o__Burkholderiales(100);f__Burkholderiaceae(98);g__Ralstonia(91);unclassified;
ICSZ4EG01A3BXW	k__Bacteria(100);p__Proteobacteria(100);c__Betaproteobacteria(100);o__Burkholderiales(100);f__Burkholderiaceae(100);g__Ralstonia(92);unclassified;
ICSZ4EG01A18BL	k__Bacteria(100);p__Proteobacteria(100);c__Alphaproteobacteria(100);o__Sphingomonadales(100);f__Sphingomonadaceae(100);g__Sphingomonas(100);s__Caulobacterleidyi(100);
ICSZ4EG01EDEM9	k__Bacteria(100);p__Bacteroidetes(100);c__Flavobacteria(100);o__Flavobacteriales(100);f__Flavobacteriaceae(100);unclassified;unclassified;
ICSZ4EG01DCG1I	k__Bacteria(100);p__Proteobacteria(100);c__Alphaproteobacteria(100);o__Sphingomonadales(100);f__Sphingomonadaceae(100);g__Sphingomonas(100);s__Sphingomonasazotifigen(100);
ICSZ4EG01CJ1VC	k__Bacteria(100);p__Proteobacteria(100);c__Alphaproteobacteria(100);o__Sphingomonadales(100);f__Sphingomonadaceae(99);g__Novosphingobium(93);s__Novosphingobiumresinovoru(92);
ICSZ4EG01CIVRE	k__Bacteria(100);p__Proteobacteria(100);c__Alphaproteobacteria(100);o__Rhizobiales(100);f__Bradyrhizobiaceae(100);g__Bradyrhizobium(100);s__Bradyrhizobiumelkani(100);
ICSZ4EG01D3E2D	k__Bacteria(99);p__Bacteroidetes(99);c__Bacteroidia(98);o__Bacteroidales(98);unclassified;unclassified;unclassified;
ICSZ4EG01EH2LI	k__Bacteria(100);p__Proteobacteria(100);c__Betaproteobacteria(100);o__Burkholderiales(100);f__Comamonadaceae(100);g__Acidovorax(95);s__Acidovoraxcaen(89);
ICSZ4EG01DVMRQ	k__Bacteria(100);p__Bacteroidetes(100);c__Bacteroidia(99);o__Bacteroidales(99);unclassified;unclassified;unclassified;
ICSZ4EG01CS6LQ	k__Bacteria(100);p__Proteobacteria(99);c__Alphaproteobacteria(99);o__Rhodospirillales(99);f__Rhodospirillaceae(99);unclassified;unclassified;
ICSZ4EG01CG569	k__Bacteria(100);p__Bacteroidetes(100);c__Bacteroidia(100);o__Bacteroidales(100);f__Rikenellaceae(100);g__Alistipes(100);unclassified;
ICSZ4EG01BBWS1	k__Bacteria(100);p__Firmicutes(89);c__Clostridia(89);o__Clostridiales(89);f__Ruminococcaceae(88);unclassified;unclassified;
ICSZ4EG01BE049	k__Bacteria(100);p__Proteobacteria(100);c__Betaproteobacteria(100);o__Burkholderiales(100);f__Burkholderiaceae(98);g__Burkholderia(98);unclassified;
ICSZ4EG01DQ5XX	k__Bacteria(100);p__Proteobacteria(100);c__Alphaproteobacteria(100);o__Caulobacterales(100);f__Caulobacteraceae(100);unclassified;unclassified;
ICSZ4EG01DC28G	k__Bacteria(100);p__Bacteroidetes(87);unclassified;unclassified;unclassified;unclassified;unclassified;
ICSZ4EG01CKPMJ	k__Bacteria(100);p__Firmicutes(100);c__Clostridia(100);o__Clostridiales(100);f__Lachnospiraceae(100);g__Clostridium(100);s__Clostridiumcelerecrescen(100);
ICSZ4EG01C86JU	k__Bacteria(100);p__Proteobacteria(100);c__Alphaproteobacteria(100);o__Sphingomonadales(100);f__Sphingomonadaceae(100);g__Sphingomonas(97);s__Caulobacterleidyi(93);
ICSZ4EG01DJ5DD	k__Bacteria(100);p__Bacteroidetes(100);c__Flavobacteria(100);o__Flavobacteriales(100);f__Flavobacteriaceae(100);g__Chryseobacterium(100);unclassified;
ICSZ4EG01DK821	k__Bacteria(100);p__Proteobacteria(100);c__Alphaproteobacteria(100);o__Sphingomonadales(100);f__Sphingomonadaceae(100);g__Sphingomonas(100);s__Sphingomonasazotifigen(93);
ICSZ4EG01ASVBC	k__Bacteria(100);p__Proteobacteria(100);c__Alphaproteobacteria(100);o__Sphingomonadales(100);f__Sphingomonadaceae(100);g__Sphingomonas(81);s__Caulobacterleidyi(81);
ICSZ4EG01DQ8RC	k__Bacteria(100);p__Bacteroidetes(100);c__Flavobacteria(100);o__Flavobacteriales(100);f__Flavobacteriaceae(100);unclassified;unclassified;
ICSZ4EG01DCBWE	k__Bacteria(100);p__Bacteroidetes(88);c__Bacteroidia(82);o__Bacteroidales(82);unclassified;unclassified;unclassified;
ICSZ4EG01CQHTA	k__Bacteria(100);p__Firmicutes(100);c__Bacilli(100);o__Lactobacillales(100);f__Streptococcaceae(100);g__Streptococcus(100);s__Streptococcuspseudopneumonia(100);
ICSZ4EG01CA4E8	k__Bacteria(100);p__Firmicutes(100);c__Clostridia(100);o__Clostridiales(100);f__Ruminococcaceae(100);g__Oscillospira(100);unclassified;
ICSZ4EG01BCG0R	k__Bacteria(100);p__Proteobacteria(100);c__Betaproteobacteria(100);o__Rhodocyclales(88);f__Rhodocyclaceae(88);g__Zoogloea(83);unclassified;
ICSZ4EG01CG4XY	k__Bacteria(100);p__Proteobacteria(100);c__Betaproteobacteria(100);o__Burkholderiales(100);f__Comamonadaceae(100);g__Acidovorax(86);unclassified;
ICSZ4EG01DNX7P	k__Bacteria(100);p__Proteobacteria(100);c__Alphaproteobacteria(100);o__Sphingomonadales(100);f__Sphingomonadaceae(100);unclassified;unclassified;
ICSZ4EG01DJ8N4	k__Bacteria(100);p__Proteobacteria(100);c__Alphaproteobacteria(100);o__Sphingomonadales(100);f__Sphingomonadaceae(99);g__Novosphingobium(90);s__Novosphingobiumresinovoru(88);
ICSZ4EG01CXW8T	k__Bacteria(100);p__Proteobacteria(99);c__Betaproteobacteria(99);o__Burkholderiales(98);unclassified;unclassified;unclassified;
ICSZ4EG01CJQ45	k__Bacteria(100);p__Proteobacteria(100);c__Alphaproteobacteria(100);o__Sphingomonadales(100);f__Sphingomonadaceae(100);g__Sphingomonas(100);unclassified;
ICSZ4EG01BIITD	k__Bacteria(100);p__Proteobacteria(100);c__Alphaproteobacteria(100);o__Sphingomonadales(100);f__Sphingomonadaceae(100);g__Sphingomonas(99);s__Caulobacterleidyi(99);
ICSZ4EG01A2XIT	k__Bacteria(100);p__Proteobacteria(95);c__Alphaproteobacteria(93);o__Sphingomonadales(85);f__Sphingomonadaceae(85);g__Sphingomonas(85);s__Caulobacterleidyi(85);
ICSZ4EG01A5WWT	k__Bacteria(100);p__Proteobacteria(100);c__Alphaproteobacteria(100);o__Sphingomonadales(100);f__Sphingomonadaceae(100);g__Sphingomonas(93);unclassified;
ICSZ4EG01EZAFM	k__Bacteria(100);p__Proteobacteria(100);c__Betaproteobacteria(100);o__Burkholderiales(100);f__Comamonadaceae(100);g__Diaphorobacter(98);unclassified;
ICSZ4EG01EVHZZ	k__Bacteria(100);p__Proteobacteria(100);c__Alphaproteobacteria(100);o__Sphingomonadales(100);f__Sphingomonadaceae(100);g__Sphingomonas(100);s__Caulobacterleidyi(100);
ICSZ4EG01EV7PX	k__Bacteria(100);p__Proteobacteria(100);c__Alphaproteobacteria(100);o__Sphingomonadales(100);f__Sphingomonadaceae(100);g__Sphingomonas(99);s__Sphingomonasazotifigen(99);
ICSZ4EG01EU80H	k__Bacteria(100);p__Proteobacteria(100);c__Alphaproteobacteria(100);o__Sphingomonadales(100);f__Sphingomonadaceae(100);g__Sphingomonas(99);s__Caulobacterleidyi(99);
ICSZ4EG01ETT1T	k__Bacteria(100);p__Proteobacteria(100);c__Alphaproteobacteria(100);o__Sphingomonadales(100);f__Sphingomonadaceae(100);g__Sphingomonas(80);unclassified;
ICSZ4EG01ERBP3	k__Bacteria(100);p__Proteobacteria(100);c__Betaproteobacteria(100);o__Burkholderiales(100);unclassified;unclassified;unclassified;
ICSZ4EG01EQXL8	k__Bacteria(100);p__Proteobacteria(100);c__Betaproteobacteria(100);o__Burkholderiales(99);unclassified;unclassified;unclassified;
ICSZ4EG01EONGA	k__Bacteria(100);p__Bacteroidetes(100);c__Flavobacteria(100);o__Flavobacteriales(100);f__Flavobacteriaceae(100);unclassified;unclassified;
ICSZ4EG01EO2VU	k__Bacteria(100);p__Bacteroidetes(100);c__Flavobacteria(100);o__Flavobacteriales(100);f__Flavobacteriaceae(100);g__Chryseobacterium(80);unclassified;
ICSZ4EG01A9RZ3	k__Bacteria(100);p__Proteobacteria(100);c__Betaproteobacteria(100);o__Burkholderiales(98);f__Comamonadaceae(86);unclassified;unclassified;
ICSZ4EG01EL5PI	k__Bacteria(100);p__Proteobacteria(100);c__Alphaproteobacteria(100);o__Sphingomonadales(100);f__Sphingomonadaceae(100);g__Sphingomonas(100);s__Caulobacterleidyi(100);
ICSZ4EG01EKWGT	k__Bacteria(100);p__Proteobacteria(100);c__Alphaproteobacteria(100);o__Sphingomonadales(100);f__Sphingomonadaceae(99);g__Sphingomonas(98);s__Caulobacterleidyi(98);
ICSZ4EG01EIMTX	k__Bacteria(100);p__Proteobacteria(100);c__Alphaproteobacteria(100);o__Sphingomonadales(100);f__Sphingomonadaceae(100);g__Sphingomonas(91);s__Caulobacterleidyi(91);
ICSZ4EG01EICL2	k__Bacteria(100);p__Proteobacteria(100);c__Alphaproteobacteria(100);o__Sphingomonadales(100);f__Sphingomonadaceae(100);g__Sphingomonas(100);s__Caulobacterleidyi(100);
ICSZ4EG01EI52P	k__Bacteria(100);p__Proteobacteria(100);c__Alphaproteobacteria(100);o__Sphingomonadales(100);f__Sphingomonadaceae(100);g__Sphingomonas(99);s__Sphingomonasazotifigen(97);
ICSZ4EG01EH9D2	k__Bacteria(100);p__Proteobacteria(100);c__Betaproteobacteria(100);o__Burkholderiales(100);unclassified;unclassified;unclassified;
ICSZ4EG01EF86R	k__Bacteria(100);p__Proteobacteria(100);c__Betaproteobacteria(100);o__Burkholderiales(99);unclassified;unclassified;unclassified;
ICSZ4EG02JSFE1	k__Bacteria(100);p__Proteobacteria(100);c__Betaproteobacteria(100);o__Burkholderiales(100);unclassified;unclassified;unclassified;
ICSZ4EG01E0AO3	k__Bacteria(100);p__Proteobacteria(100);c__Alphaproteobacteria(100);o__Sphingomonadales(100);f__Sphingomonadaceae(100);g__Sphingomonas(99);s__Caulobacterleidyi(99);
ICSZ4EG01DWK3I	k__Bacteria(100);p__Proteobacteria(100);c__Alphaproteobacteria(100);o__Sphingomonadales(100);f__Sphingomonadaceae(100);g__Sphingomonas(99);s__Caulobacterleidyi(99);
ICSZ4EG01DS8U5	k__Bacteria(100);p__Proteobacteria(99);c__Betaproteobacteria(99);o__Burkholderiales(95);unclassified;unclassified;unclassified;
ICSZ4EG01DNDU4	k__Bacteria(100);p__Proteobacteria(100);c__Betaproteobacteria(100);o__Burkholderiales(100);f__Comamonadaceae(99);unclassified;unclassified;
ICSZ4EG01DK3JK	k__Bacteria(100);p__Proteobacteria(100);c__Alphaproteobacteria(100);o__Sphingomonadales(100);f__Sphingomonadaceae(100);g__Sphingomonas(99);s__Caulobacterleidyi(99);
ICSZ4EG01DK14Y	k__Bacteria(100);p__Proteobacteria(100);c__Alphaproteobacteria(100);o__Rhizobiales(100);f__Bradyrhizobiaceae(100);g__Bradyrhizobium(99);s__Bradyrhizobiumelkani(99);
ICSZ4EG02FL3EA	k__Bacteria(100);p__Proteobacteria(100);c__Betaproteobacteria(100);o__Burkholderiales(100);f__Comamonadaceae(99);unclassified;unclassified;
ICSZ4EG01D7OC7	k__Bacteria(100);p__Proteobacteria(100);c__Betaproteobacteria(100);o__Burkholderiales(99);unclassified;unclassified;unclassified;
ICSZ4EG01D7NGP	k__Bacteria(100);p__Proteobacteria(100);c__Alphaproteobacteria(100);o__Sphingomonadales(100);f__Sphingomonadaceae(100);g__Sphingomonas(85);unclassified;
ICSZ4EG01D71M6	k__Bacteria(100);p__Proteobacteria(100);c__Betaproteobacteria(100);o__Burkholderiales(100);f__Comamonadaceae(100);g__Acidovorax(91);unclassified;
ICSZ4EG01D675S	k__Bacteria(100);p__Bacteroidetes(100);c__Flavobacteria(100);o__Flavobacteriales(100);f__Flavobacteriaceae(100);unclassified;unclassified;
ICSZ4EG01D5VLK	k__Bacteria(100);p__Proteobacteria(99);c__Alphaproteobacteria(99);o__Rhizobiales(99);f__Phyllobacteriaceae(90);unclassified;unclassified;
ICSZ4EG01EE8QS	k__Bacteria(100);p__Bacteroidetes(94);c__Bacteroidia(93);o__Bacteroidales(93);unclassified;unclassified;unclassified;
ICSZ4EG01D5AVV	k__Bacteria(100);p__Proteobacteria(100);c__Alphaproteobacteria(100);o__Sphingomonadales(100);f__Sphingomonadaceae(100);g__Sphingomonas(100);s__Sphingomonasazotifigen(100);
ICSZ4EG01CUBBS	k__Bacteria(100);p__Proteobacteria(100);c__Alphaproteobacteria(100);o__Sphingomonadales(100);f__Sphingomonadaceae(100);g__Sphingomonas(100);s__Caulobacterleidyi(100);
ICSZ4EG01CPLZH	k__Bacteria(100);p__Proteobacteria(100);c__Alphaproteobacteria(100);o__Sphingomonadales(100);f__Sphingomonadaceae(100);g__Sphingomonas(93);s__Caulobacterleidyi(93);
ICSZ4EG01CPCAM	k__Bacteria(100);p__Bacteroidetes(100);c__Flavobacteria(100);o__Flavobacteriales(100);f__Flavobacteriaceae(100);unclassified;unclassified;
ICSZ4EG01CNYM2	k__Bacteria(100);p__Bacteroidetes(100);c__Flavobacteria(100);o__Flavobacteriales(100);f__Flavobacteriaceae(100);unclassified;unclassified;
ICSZ4EG01CKOFU	k__Bacteria(100);p__Proteobacteria(100);c__Alphaproteobacteria(100);o__Sphingomonadales(100);f__Sphingomonadaceae(100);g__Sphingomonas(98);s__Caulobacterleidyi(98);
ICSZ4EG01CKFK0	k__Bacteria(100);p__Proteobacteria(100);c__Gammaproteobacteria(100);o__Pseudomonadales(100);f__Pseudomonadaceae(100);g__Pseudomonas(100);s__Pseudomonasmosseli(92);
ICSZ4EG01CH9XR	k__Bacteria(100);p__Firmicutes(99);c__Clostridia(99);o__Clostridiales(99);f__Ruminococcaceae(99);g__Oscillospira(99);unclassified;
ICSZ4EG01CDBU5	k__Bacteria(100);p__Proteobacteria(100);c__Alphaproteobacteria(100);o__Sphingomonadales(100);f__Sphingomonadaceae(100);g__Sphingomonas(100);s__Caulobacterleidyi(100);
ICSZ4EG01CCC1X	k__Bacteria(100);p__Proteobacteria(100);c__Alphaproteobacteria(100);o__Sphingomonadales(100);f__Sphingomonadaceae(100);g__Sphingomonas(98);s__Caulobacterleidyi(98);
ICSZ4EG01CBT5V	k__Bacteria(100);p__Proteobacteria(100);c__Betaproteobacteria(100);o__Burkholderiales(97);unclassified;unclassified;unclassified;
ICSZ4EG01C8ILN	k__Bacteria(100);p__Proteobacteria(100);c__Betaproteobacteria(95);o__Burkholderiales(95);unclassified;unclassified;unclassified;
ICSZ4EG01C7QXN	k__Bacteria(100);p__Proteobacteria(100);c__Alphaproteobacteria(100);o__Sphingomonadales(100);f__Sphingomonadaceae(100);g__Sphingomonas(95);s__Caulobacterleidyi(95);
ICSZ4EG01C5P4E	k__Bacteria(98);p__Bacteroidetes(80);unclassified;unclassified;unclassified;unclassified;unclassified;
ICSZ4EG01C57QX	k__Bacteria(100);p__Proteobacteria(97);c__Alphaproteobacteria(95);o__Sphingomonadales(95);f__Sphingomonadaceae(95);g__Sphingomonas(95);s__Caulobacterleidyi(95);
ICSZ4EG01C43J4	k__Bacteria(100);p__Proteobacteria(100);c__Betaproteobacteria(100);o__Burkholderiales(93);unclassified;unclassified;unclassified;
ICSZ4EG01BYTJ8	k__Bacteria(100);p__Proteobacteria(100);c__Alphaproteobacteria(100);o__Sphingomonadales(100);f__Sphingomonadaceae(100);g__Sphingomonas(99);s__Caulobacterleidyi(99);
ICSZ4EG01BY1AK	k__Bacteria(100);p__Proteobacteria(99);c__Alphaproteobacteria(99);o__Sphingomonadales(99);f__Sphingomonadaceae(99);g__Sphingomonas(99);s__Caulobacterleidyi(99);
ICSZ4EG01BX217	k__Bacteria(100);p__Proteobacteria(100);c__Alphaproteobacteria(100);o__Sphingomonadales(100);f__Sphingomonadaceae(100);g__Sphingomonas(98);unclassified;
ICSZ4EG01BTK6X	k__Bacteria(100);p__Proteobacteria(100);c__Alphaproteobacteria(100);o__Sphingomonadales(100);f__Sphingomonadaceae(99);g__Sphingomonas(99);s__Caulobacterleidyi(99);
ICSZ4EG01BS8TP	k__Bacteria(100);p__Firmicutes(98);c__Bacilli(98);o__Lactobacillales(98);f__Aerococcaceae(97);unclassified;unclassified;
ICSZ4EG01BRZDD	k__Bacteria(100);p__Proteobacteria(100);c__Betaproteobacteria(100);o__Burkholderiales(97);unclassified;unclassified;unclassified;
ICSZ4EG01BNAV4	k__Bacteria(100);p__Proteobacteria(100);c__Betaproteobacteria(98);o__Burkholderiales(98);unclassified;unclassified;unclassified;
ICSZ4EG01BM5JR	k__Bacteria(100);p__Proteobacteria(100);c__Alphaproteobacteria(100);o__Sphingomonadales(100);f__Sphingomonadaceae(100);g__Sphingomonas(100);s__Caulobacterleidyi(100);
ICSZ4EG01BJVDB	k__Bacteria(100);p__Bacteroidetes(100);c__Bacteroidia(99);o__Bacteroidales(99);unclassified;unclassified;unclassified;
ICSZ4EG01BITDP	k__Bacteria(100);p__Proteobacteria(100);c__Alphaproteobacteria(100);o__Sphingomonadales(100);f__Sphingomonadaceae(98);unclassified;unclassified;
ICSZ4EG01BHOTA	k__Bacteria(100);p__Proteobacteria(100);c__Alphaproteobacteria(100);o__Sphingomonadales(100);f__Sphingomonadaceae(100);g__Sphingomonas(100);s__Caulobacterleidyi(100);
ICSZ4EG01BGEOC	k__Bacteria(100);p__Firmicutes(91);c__Clostridia(89);o__Clostridiales(89);f__Lachnospiraceae(89);unclassified;unclassified;
ICSZ4EG01BFBFL	k__Bacteria(100);p__Proteobacteria(100);c__Betaproteobacteria(98);o__Burkholderiales(98);unclassified;unclassified;unclassified;
ICSZ4EG01B94Y8	k__Bacteria(100);p__Proteobacteria(100);c__Alphaproteobacteria(100);o__Sphingomonadales(100);f__Sphingomonadaceae(100);g__Sphingomonas(100);s__Caulobacterleidyi(100);
ICSZ4EG01B6VQB	k__Bacteria(99);unclassified;unclassified;unclassified;unclassified;unclassified;unclassified;
ICSZ4EG01B5XVU	k__Bacteria(99);p__Proteobacteria(99);c__Betaproteobacteria(99);o__Burkholderiales(98);unclassified;unclassified;unclassified;
ICSZ4EG01B3JFW	k__Bacteria(100);p__Bacteroidetes(100);c__Flavobacteria(100);o__Flavobacteriales(100);f__Flavobacteriaceae(100);g__Chryseobacterium(100);unclassified;
ICSZ4EG01B220Z	k__Bacteria(100);p__Proteobacteria(100);c__Alphaproteobacteria(100);o__Sphingomonadales(100);f__Sphingomonadaceae(100);g__Sphingomonas(99);s__Caulobacterleidyi(99);
ICSZ4EG01AZSGY	k__Bacteria(100);p__Proteobacteria(100);c__Alphaproteobacteria(100);o__Sphingomonadales(100);f__Sphingomonadaceae(100);g__Sphingomonas(100);s__Caulobacterleidyi(100);
ICSZ4EG01AX3QM	k__Bacteria(100);p__Proteobacteria(100);c__Betaproteobacteria(100);o__Burkholderiales(100);f__Comamonadaceae(99);unclassified;unclassified;
ICSZ4EG01ATVEU	k__Bacteria(100);p__Proteobacteria(100);c__Alphaproteobacteria(100);o__Caulobacterales(100);f__Caulobacteraceae(100);unclassified;unclassified;
ICSZ4EG01AQK6X	k__Bacteria(100);p__Proteobacteria(100);c__Alphaproteobacteria(100);o__Sphingomonadales(100);f__Sphingomonadaceae(100);g__Sphingomonas(99);s__Sphingomonasazotifigen(94);
ICSZ4EG01APHKZ	k__Bacteria(100);p__Proteobacteria(100);c__Alphaproteobacteria(100);o__Sphingomonadales(100);f__Sphingomonadaceae(100);g__Sphingomonas(99);s__Caulobacterleidyi(99);
ICSZ4EG01AO1ZD	k__Bacteria(100);p__Bacteroidetes(100);c__Flavobacteria(100);o__Flavobacteriales(100);f__Flavobacteriaceae(100);unclassified;unclassified;
ICSZ4EG01AKWSF	k__Bacteria(100);unclassified;unclassified;unclassified;unclassified;unclassified;unclassified;
ICSZ4EG01AKQQB	k__Bacteria(99);p__Proteobacteria(99);c__Alphaproteobacteria(99);o__Sphingomonadales(99);f__Sphingomonadaceae(99);g__Sphingomonas(99);s__Caulobacterleidyi(98);
ICSZ4EG01A6NA9	k__Bacteria(100);p__Proteobacteria(100);c__Alphaproteobacteria(100);o__Sphingomonadales(100);f__Sphingomonadaceae(100);g__Sphingomonas(92);s__Caulobacterleidyi(89);
ICSZ4EG01A5UU1	k__Bacteria(100);p__Bacteroidetes(100);c__Flavobacteria(100);o__Flavobacteriales(100);f__Flavobacteriaceae(100);unclassified;unclassified;
ICSZ4EG02HYVOU	k__Bacteria(100);p__Proteobacteria(94);c__Alphaproteobacteria(94);o__Sphingomonadales(94);f__Sphingomonadaceae(94);g__Sphingomonas(92);s__Caulobacterleidyi(92);
ICSZ4EG01A4HUD	k__Bacteria(100);p__Proteobacteria(100);c__Betaproteobacteria(100);o__Burkholderiales(100);f__Comamonadaceae(100);g__Acidovorax(92);unclassified;
ICSZ4EG01A44NS	k__Bacteria(100);p__Proteobacteria(100);c__Alphaproteobacteria(100);o__Sphingomonadales(100);f__Sphingomonadaceae(100);g__Sphingomonas(97);unclassified;
ICSZ4EG01A1GHA	k__Bacteria(100);p__Proteobacteria(100);c__Betaproteobacteria(97);o__Burkholderiales(94);unclassified;unclassified;unclassified;
ICSZ4EG01A17XZ	k__Bacteria(98);unclassified;unclassified;unclassified;unclassified;unclassified;unclassified;
ICSZ4EG01C4XJ9	k__Bacteria(97);unclassified;unclassified;unclassified;unclassified;unclassified;unclassified;
ICSZ4EG01D43TX	k__Bacteria(100);p__Proteobacteria(100);c__Alphaproteobacteria(100);o__Sphingomonadales(100);f__Sphingomonadaceae(100);g__Sphingobium(100);unclassified;
ICSZ4EG01A2V5R	k__Bacteria(100);p__Proteobacteria(100);c__Alphaproteobacteria(100);o__Sphingomonadales(100);f__Sphingomonadaceae(100);g__Sphingomonas(99);s__Sphingomonasyabuuchia(96);
ICSZ4EG01DPSBK	k__Bacteria(100);p__Proteobacteria(100);c__Alphaproteobacteria(100);o__Rhodobacterales(89);f__Rhodobacteraceae(88);unclassified;unclassified;
ICSZ4EG01D0GVI	k__Bacteria(100);p__Proteobacteria(100);c__Betaproteobacteria(100);o__Burkholderiales(100);f__Comamonadaceae(100);g__Delftia(100);unclassified;
ICSZ4EG01DK9IN	k__Bacteria(100);p__Proteobacteria(100);c__Betaproteobacteria(100);o__Burkholderiales(100);f__Comamonadaceae(100);g__Hylemonella(100);unclassified;
ICSZ4EG01CWT8Y	k__Bacteria(100);p__Proteobacteria(100);c__Alphaproteobacteria(100);o__Rhizobiales(99);f__Methylobacteriaceae(96);g__Methylobacterium(96);unclassified;
ICSZ4EG01EQP60	k__Bacteria(100);p__Proteobacteria(100);c__Alphaproteobacteria(100);o__Sphingomonadales(100);f__Sphingomonadaceae(100);g__Sphingomonas(100);s__Sphingomonasyabuuchia(100);
ICSZ4EG01C13HQ	k__Bacteria(100);p__Proteobacteria(100);c__Alphaproteobacteria(100);o__Sphingomonadales(100);f__Sphingomonadaceae(100);g__Sphingobium(100);s__Sphingomonassp.SKA5(97);
ICSZ4EG01CC4L6	k__Bacteria(100);p__Proteobacteria(99);c__Alphaproteobacteria(99);o__Sphingomonadales(99);f__Sphingomonadaceae(99);unclassified;unclassified;
ICSZ4EG01BDARG	k__Bacteria(100);p__Proteobacteria(100);c__Alphaproteobacteria(100);o__Sphingomonadales(100);f__Sphingomonadaceae(100);g__Sphingomonas(88);s__Caulobacterleidyi(81);
ICSZ4EG01B8RLZ	k__Bacteria(100);p__Firmicutes(100);c__Bacilli(100);o__Lactobacillales(100);f__Carnobacteriaceae(100);unclassified;unclassified;
ICSZ4EG01CUT6T	k__Bacteria(100);p__Proteobacteria(100);c__Alphaproteobacteria(100);o__Sphingomonadales(100);f__Sphingomonadaceae(100);g__Sphingobium(91);s__Sphingomonassp.SKA5(91);
ICSZ4EG01DZHQJ	k__Bacteria(98);unclassified;unclassified;unclassified;unclassified;unclassified;unclassified;
ICSZ4EG01DV47D	k__Bacteria(99);p__Firmicutes(92);c__Bacilli(88);o__Bacillales(81);unclassified;unclassified;unclassified;
ICSZ4EG01CTPTQ	k__Bacteria(100);p__Bacteroidetes(100);c__Flavobacteria(100);o__Flavobacteriales(100);f__Flavobacteriaceae(100);g__Chryseobacterium(100);unclassified;
ICSZ4EG01C8Q8B	k__Bacteria(100);p__Bacteroidetes(100);c__Flavobacteria(100);o__Flavobacteriales(100);f__Flavobacteriaceae(100);g__Chryseobacterium(91);unclassified;
ICSZ4EG01BA0PJ	k__Bacteria(100);p__Proteobacteria(100);c__Betaproteobacteria(100);o__Burkholderiales(100);f__Comamonadaceae(100);g__Acidovorax(99);unclassified;
ICSZ4EG01EPNFS	k__Bacteria(100);p__Proteobacteria(100);c__Alphaproteobacteria(100);o__Sphingomonadales(100);f__Sphingomonadaceae(100);g__Sphingomonas(98);s__Caulobacterleidyi(98);
ICSZ4EG01DMAEM	k__Bacteria(100);p__Firmicutes(100);c__Bacilli(100);o__Lactobacillales(100);f__Enterococcaceae(100);g__Enterococcus(100);s__Enterococcusgallinaru(99);
ICSZ4EG01BNE28	k__Bacteria(100);p__Proteobacteria(99);c__Alphaproteobacteria(99);o__Sphingomonadales(99);f__Sphingomonadaceae(96);unclassified;unclassified;
ICSZ4EG01AWZ08	k__Bacteria(100);p__Proteobacteria(100);c__Betaproteobacteria(100);o__Burkholderiales(100);f__Comamonadaceae(90);unclassified;unclassified;
ICSZ4EG01CD1GS	k__Bacteria(100);p__Proteobacteria(100);c__Betaproteobacteria(100);o__Burkholderiales(100);f__Comamonadaceae(100);unclassified;unclassified;
ICSZ4EG01DR5NY	k__Bacteria(100);p__Proteobacteria(100);c__Alphaproteobacteria(100);o__Sphingomonadales(100);f__Sphingomonadaceae(100);g__Sphingomonas(100);s__Caulobacterleidyi(100);
ICSZ4EG01DF2HN	k__Bacteria(100);p__Proteobacteria(100);c__Betaproteobacteria(100);o__Burkholderiales(100);f__Comamonadaceae(100);g__Diaphorobacter(94);unclassified;
ICSZ4EG01DBFPC	k__Bacteria(100);p__Proteobacteria(100);c__Alphaproteobacteria(100);o__Sphingomonadales(100);f__Sphingomonadaceae(100);g__Sphingomonas(80);s__Caulobacterleidyi(80);
ICSZ4EG01D36KG	k__Bacteria(100);p__Proteobacteria(100);c__Betaproteobacteria(100);o__Burkholderiales(100);f__Comamonadaceae(100);g__Acidovorax(100);unclassified;
ICSZ4EG01BE3IV	k__Bacteria(100);p__Proteobacteria(100);c__Alphaproteobacteria(100);o__Sphingomonadales(100);f__Sphingomonadaceae(100);g__Sphingobium(81);unclassified;
ICSZ4EG01B2NIG	k__Bacteria(100);p__Proteobacteria(100);c__Alphaproteobacteria(100);o__Sphingomonadales(100);f__Sphingomonadaceae(100);g__Sphingomonas(99);s__Caulobacterleidyi(96);
ICSZ4EG01EIYMB	k__Bacteria(100);p__Proteobacteria(100);c__Betaproteobacteria(100);o__Burkholderiales(100);f__Comamonadaceae(100);unclassified;unclassified;
ICSZ4EG01BTJUR	k__Bacteria(100);p__Proteobacteria(100);c__Alphaproteobacteria(100);o__Sphingomonadales(100);f__Sphingomonadaceae(100);g__Sphingomonas(93);s__Sphingomonasyabuuchia(80);
ICSZ4EG01BHN8X	k__Bacteria(100);p__Proteobacteria(100);c__Alphaproteobacteria(100);o__Rhizobiales(100);f__Bradyrhizobiaceae(100);unclassified;unclassified;
ICSZ4EG01B65GN	k__Bacteria(100);p__Proteobacteria(100);c__Gammaproteobacteria(100);o__Pseudomonadales(100);f__Moraxellaceae(100);g__Enhydrobacter(100);s__Enhydrobacteraerosaccu(100);
ICSZ4EG01BTKO5	k__Bacteria(100);p__Proteobacteria(100);c__Alphaproteobacteria(100);o__Sphingomonadales(100);f__Sphingomonadaceae(100);unclassified;unclassified;
ICSZ4EG01BTUXN	k__Bacteria(100);p__Proteobacteria(100);c__Betaproteobacteria(100);o__Burkholderiales(100);f__Comamonadaceae(100);unclassified;unclassified;
ICSZ4EG01ER395	k__Bacteria(100);p__Proteobacteria(100);c__Betaproteobacteria(98);o__Burkholderiales(98);unclassified;unclassified;unclassified;
ICSZ4EG01EQY2X	k__Bacteria(100);p__Proteobacteria(100);c__Betaproteobacteria(96);o__Burkholderiales(94);unclassified;unclassified;unclassified;
ICSZ4EG01EN23A	k__Bacteria(100);p__Proteobacteria(100);c__Betaproteobacteria(100);o__Burkholderiales(99);unclassified;unclassified;unclassified;
ICSZ4EG01D7KZ1	k__Bacteria(100);p__Proteobacteria(100);c__Betaproteobacteria(100);o__Burkholderiales(100);f__Comamonadaceae(100);unclassified;unclassified;
ICSZ4EG01EJ38T	k__Bacteria(100);p__Proteobacteria(100);c__Betaproteobacteria(100);o__Burkholderiales(97);unclassified;unclassified;unclassified;
ICSZ4EG01EIQPI	k__Bacteria(98);unclassified;unclassified;unclassified;unclassified;unclassified;unclassified;
ICSZ4EG01EGL6D	k__Bacteria(100);p__Proteobacteria(100);c__Alphaproteobacteria(100);o__Sphingomonadales(100);f__Sphingomonadaceae(100);g__Sphingomonas(93);s__Caulobacterleidyi(90);
ICSZ4EG01EF3OP	k__Bacteria(100);p__Proteobacteria(100);c__Betaproteobacteria(99);o__Burkholderiales(97);unclassified;unclassified;unclassified;
ICSZ4EG01BGRRM	k__Bacteria(100);p__Proteobacteria(100);c__Betaproteobacteria(100);o__Burkholderiales(100);f__Comamonadaceae(100);unclassified;unclassified;
ICSZ4EG01DYKAC	k__Bacteria(100);p__Proteobacteria(100);c__Alphaproteobacteria(100);o__Sphingomonadales(100);f__Sphingomonadaceae(100);unclassified;unclassified;
ICSZ4EG01DWUMX	k__Bacteria(100);p__Proteobacteria(100);c__Betaproteobacteria(100);o__Burkholderiales(100);f__Comamonadaceae(100);g__Acidovorax(88);unclassified;
ICSZ4EG01DW84S	k__Bacteria(100);p__Proteobacteria(100);c__Betaproteobacteria(100);o__Burkholderiales(100);f__Comamonadaceae(100);g__Acidovorax(93);unclassified;
ICSZ4EG01DVK6F	k__Bacteria(100);p__Proteobacteria(100);c__Gammaproteobacteria(100);o__Xanthomonadales(100);f__Xanthomonadaceae(100);g__Stenotrophomonas(99);unclassified;
ICSZ4EG01DV1X3	k__Bacteria(100);p__Proteobacteria(100);c__Betaproteobacteria(100);o__Burkholderiales(98);unclassified;unclassified;unclassified;
ICSZ4EG01DTW9C	k__Bacteria(100);p__Proteobacteria(100);c__Alphaproteobacteria(100);o__Sphingomonadales(100);f__Sphingomonadaceae(100);g__Sphingomonas(98);s__Caulobacterleidyi(98);
ICSZ4EG02JYBAO	k__Bacteria(100);p__Proteobacteria(100);c__Betaproteobacteria(100);o__Burkholderiales(100);unclassified;unclassified;unclassified;
ICSZ4EG01DPQGD	k__Bacteria(100);p__Proteobacteria(100);c__Betaproteobacteria(100);o__Burkholderiales(98);unclassified;unclassified;unclassified;
ICSZ4EG01DORA7	k__Bacteria(100);p__Proteobacteria(100);c__Betaproteobacteria(100);o__Burkholderiales(100);f__Comamonadaceae(100);g__Acidovorax(93);unclassified;
ICSZ4EG01DM1B7	k__Bacteria(97);unclassified;unclassified;unclassified;unclassified;unclassified;unclassified;
ICSZ4EG01DH2BD	k__Bacteria(100);p__Proteobacteria(100);c__Betaproteobacteria(100);o__Burkholderiales(100);f__Comamonadaceae(100);g__Acidovorax(88);unclassified;
ICSZ4EG01D7RIL	k__Bacteria(100);p__Proteobacteria(100);c__Alphaproteobacteria(100);o__Sphingomonadales(100);f__Sphingomonadaceae(100);g__Sphingomonas(98);s__Caulobacterleidyi(98);
ICSZ4EG01D77CB	k__Bacteria(100);p__Proteobacteria(100);c__Betaproteobacteria(97);o__Burkholderiales(97);unclassified;unclassified;unclassified;
ICSZ4EG01D1Y8R	k__Bacteria(100);p__Proteobacteria(100);c__Betaproteobacteria(100);o__Burkholderiales(100);f__Comamonadaceae(100);g__Delftia(98);unclassified;
ICSZ4EG01D0I2A	k__Bacteria(100);p__Proteobacteria(100);c__Alphaproteobacteria(98);o__Sphingomonadales(98);f__Sphingomonadaceae(98);unclassified;unclassified;
ICSZ4EG02F82QV	k__Bacteria(100);p__Proteobacteria(96);c__Alphaproteobacteria(95);o__Sphingomonadales(95);f__Sphingomonadaceae(95);g__Sphingomonas(95);s__Caulobacterleidyi(95);
ICSZ4EG01CY2GW	k__Bacteria(100);p__Proteobacteria(100);c__Alphaproteobacteria(100);o__Rhizobiales(100);f__Bradyrhizobiaceae(100);g__Bradyrhizobium(86);s__Bradyrhizobiumelkani(85);
ICSZ4EG01CXKR1	k__Bacteria(100);p__Proteobacteria(100);c__Betaproteobacteria(98);o__Burkholderiales(97);unclassified;unclassified;unclassified;
ICSZ4EG01CTCMM	k__Bacteria(100);p__Proteobacteria(99);c__Alphaproteobacteria(97);o__Rhodobacterales(90);f__Rhodobacteraceae(89);unclassified;unclassified;
ICSZ4EG01CSPAX	k__Bacteria(99);p__Proteobacteria(97);c__Betaproteobacteria(95);o__Burkholderiales(95);unclassified;unclassified;unclassified;
ICSZ4EG01CNXJ0	k__Bacteria(100);p__Proteobacteria(100);c__Alphaproteobacteria(100);o__Sphingomonadales(100);f__Sphingomonadaceae(98);g__Sphingomonas(98);s__Caulobacterleidyi(98);
ICSZ4EG01CNSEE	k__Bacteria(100);p__Proteobacteria(100);c__Betaproteobacteria(100);o__Burkholderiales(100);f__Comamonadaceae(100);g__Acidovorax(98);unclassified;
ICSZ4EG02F0L6V	k__Bacteria(100);p__Proteobacteria(100);c__Betaproteobacteria(100);unclassified;unclassified;unclassified;unclassified;
ICSZ4EG01CAPFQ	k__Bacteria(99);p__Bacteroidetes(98);c__Bacteroidia(96);o__Bacteroidales(96);unclassified;unclassified;unclassified;
ICSZ4EG01C8UEL	k__Bacteria(100);p__Proteobacteria(100);c__Betaproteobacteria(100);o__Burkholderiales(100);f__Comamonadaceae(100);g__Acidovorax(98);unclassified;
ICSZ4EG01C8GAS	k__Bacteria(100);p__Proteobacteria(100);c__Alphaproteobacteria(100);o__Sphingomonadales(99);f__Sphingomonadaceae(99);g__Sphingomonas(97);s__Caulobacterleidyi(96);
ICSZ4EG01C7XHO	k__Bacteria(100);p__Proteobacteria(100);c__Betaproteobacteria(100);o__Burkholderiales(100);f__Comamonadaceae(100);g__Acidovorax(98);unclassified;
ICSZ4EG01C4FSF	k__Bacteria(100);p__Proteobacteria(100);c__Betaproteobacteria(100);o__Burkholderiales(100);unclassified;unclassified;unclassified;
ICSZ4EG01C38I4	k__Bacteria(100);p__Proteobacteria(100);c__Alphaproteobacteria(100);o__Sphingomonadales(100);f__Sphingomonadaceae(100);unclassified;unclassified;
ICSZ4EG01BXTFJ	k__Bacteria(100);p__Proteobacteria(100);c__Alphaproteobacteria(100);o__Sphingomonadales(100);f__Sphingomonadaceae(100);g__Sphingomonas(96);s__Caulobacterleidyi(96);
ICSZ4EG01BXDTD	k__Bacteria(100);p__Proteobacteria(96);c__Betaproteobacteria(93);o__Burkholderiales(91);unclassified;unclassified;unclassified;
ICSZ4EG01BURJ7	k__Bacteria(100);p__Proteobacteria(100);c__Betaproteobacteria(100);o__Burkholderiales(100);f__Comamonadaceae(100);g__Acidovorax(94);s__Acidovoraxcaen(84);
ICSZ4EG01BO52K	k__Bacteria(100);p__Proteobacteria(99);c__Betaproteobacteria(97);o__Burkholderiales(95);unclassified;unclassified;unclassified;
ICSZ4EG01BNMRV	k__Bacteria(100);p__Proteobacteria(100);c__Alphaproteobacteria(100);o__Sphingomonadales(100);f__Sphingomonadaceae(100);g__Sphingomonas(100);s__Caulobacterleidyi(100);
ICSZ4EG01BNJ77	k__Bacteria(100);p__Proteobacteria(100);c__Betaproteobacteria(100);o__Burkholderiales(96);unclassified;unclassified;unclassified;
ICSZ4EG01BLZ5E	k__Bacteria(100);p__Proteobacteria(99);c__Alphaproteobacteria(95);o__Rhodobacterales(92);f__Rhodobacteraceae(86);unclassified;unclassified;
ICSZ4EG01BLLM8	k__Bacteria(100);p__Proteobacteria(100);c__Alphaproteobacteria(100);o__Sphingomonadales(100);f__Sphingomonadaceae(100);g__Sphingomonas(100);s__Caulobacterleidyi(100);
ICSZ4EG01BLJW8	k__Bacteria(100);p__Proteobacteria(100);c__Betaproteobacteria(99);o__Burkholderiales(97);unclassified;unclassified;unclassified;
ICSZ4EG01BL340	k__Bacteria(100);p__Proteobacteria(100);c__Alphaproteobacteria(100);o__Sphingomonadales(100);f__Sphingomonadaceae(100);g__Sphingomonas(97);s__Caulobacterleidyi(97);
ICSZ4EG01CSTFR	k__Bacteria(100);p__Proteobacteria(100);c__Betaproteobacteria(100);o__Burkholderiales(96);unclassified;unclassified;unclassified;
ICSZ4EG01AT9P0	k__Bacteria(100);p__Proteobacteria(100);c__Betaproteobacteria(100);o__Burkholderiales(100);f__Comamonadaceae(100);g__Acidovorax(86);unclassified;
ICSZ4EG01BE6WW	k__Bacteria(100);p__Proteobacteria(100);c__Betaproteobacteria(97);o__Burkholderiales(94);unclassified;unclassified;unclassified;
ICSZ4EG01BE1KF	k__Bacteria(100);p__Proteobacteria(100);c__Alphaproteobacteria(100);o__Rhizobiales(100);f__Bradyrhizobiaceae(100);unclassified;unclassified;
ICSZ4EG01BBLO9	k__Bacteria(100);p__Proteobacteria(100);c__Betaproteobacteria(98);o__Burkholderiales(98);unclassified;unclassified;unclassified;
ICSZ4EG01B7VTG	k__Bacteria(100);p__Proteobacteria(100);c__Betaproteobacteria(99);o__Burkholderiales(97);unclassified;unclassified;unclassified;
ICSZ4EG01B68X4	k__Bacteria(100);p__Proteobacteria(100);c__Betaproteobacteria(100);o__Burkholderiales(100);f__Comamonadaceae(100);g__Diaphorobacter(99);unclassified;
ICSZ4EG01B4WRZ	k__Bacteria(100);p__Proteobacteria(100);c__Betaproteobacteria(100);o__Burkholderiales(100);f__Comamonadaceae(100);g__Diaphorobacter(98);unclassified;
ICSZ4EG01AWZF4	k__Bacteria(100);p__Proteobacteria(99);c__Betaproteobacteria(98);o__Burkholderiales(97);unclassified;unclassified;unclassified;
ICSZ4EG01ATH8P	k__Bacteria(100);p__Proteobacteria(100);c__Alphaproteobacteria(100);o__Sphingomonadales(100);f__Sphingomonadaceae(100);g__Sphingomonas(99);s__Caulobacterleidyi(99);
ICSZ4EG01CY1I3	k__Bacteria(100);p__Proteobacteria(100);c__Betaproteobacteria(100);o__Burkholderiales(100);f__Comamonadaceae(87);unclassified;unclassified;
ICSZ4EG01AQB3R	k__Bacteria(100);p__Proteobacteria(100);c__Alphaproteobacteria(100);o__Sphingomonadales(100);f__Sphingomonadaceae(100);g__Sphingomonas(94);s__Sphingomonasyabuuchia(86);
ICSZ4EG01AK5ZG	k__Bacteria(100);p__Proteobacteria(100);c__Alphaproteobacteria(100);o__Sphingomonadales(100);f__Sphingomonadaceae(100);g__Sphingomonas(100);s__Caulobacterleidyi(100);
ICSZ4EG01ANZ1R	k__Bacteria(100);p__Proteobacteria(100);c__Betaproteobacteria(100);o__Burkholderiales(100);f__Comamonadaceae(88);unclassified;unclassified;
ICSZ4EG01AIFYU	k__Bacteria(100);p__Proteobacteria(100);c__Betaproteobacteria(100);o__Burkholderiales(100);f__Comamonadaceae(100);unclassified;unclassified;
ICSZ4EG01A105Y	k__Bacteria(100);p__Proteobacteria(100);c__Betaproteobacteria(100);o__Burkholderiales(100);f__Comamonadaceae(100);unclassified;unclassified;
ICSZ4EG01DKY0M	k__Bacteria(100);p__Proteobacteria(100);c__Alphaproteobacteria(100);o__Sphingomonadales(100);f__Sphingomonadaceae(97);g__Sphingomonas(85);unclassified;
ICSZ4EG01DHASN	k__Bacteria(100);p__Firmicutes(95);c__Bacilli(95);o__Lactobacillales(95);f__Aerococcaceae(91);unclassified;unclassified;
ICSZ4EG01DOCDA	k__Bacteria(100);p__Firmicutes(98);c__Clostridia(98);o__Clostridiales(98);f__Lachnospiraceae(98);g__Lachnobacterium(96);unclassified;
ICSZ4EG01CZX2R	k__Bacteria(100);p__Firmicutes(97);c__Bacilli(97);o__Lactobacillales(96);f__Aerococcaceae(91);unclassified;unclassified;
ICSZ4EG01EPR3E	k__Bacteria(100);unclassified;unclassified;unclassified;unclassified;unclassified;unclassified;
ICSZ4EG01BZQOF	k__Bacteria(100);p__Bacteroidetes(97);c__Bacteroidia(96);o__Bacteroidales(96);unclassified;unclassified;unclassified;
ICSZ4EG01CKWQZ	k__Bacteria(100);p__Actinobacteria(80);c__Actinobacteria(80);o__Actinomycetales(80);unclassified;unclassified;unclassified;
ICSZ4EG01D8YX0	k__Bacteria(100);p__Proteobacteria(100);c__Alphaproteobacteria(100);o__Sphingomonadales(100);f__Sphingomonadaceae(100);g__Sphingomonas(100);s__Caulobacterleidyi(100);
ICSZ4EG01A6QUG	k__Bacteria(100);p__Firmicutes(99);c__Clostridia(99);o__Clostridiales(99);f__Lachnospiraceae(99);unclassified;unclassified;
ICSZ4EG01BJYZS	k__Bacteria(100);p__Proteobacteria(100);c__Alphaproteobacteria(100);o__Sphingomonadales(100);f__Sphingomonadaceae(100);unclassified;unclassified;
ICSZ4EG01ET20A	k__Bacteria(100);p__Proteobacteria(100);c__Alphaproteobacteria(100);o__Sphingomonadales(100);f__Sphingomonadaceae(98);g__Sphingomonas(85);unclassified;
ICSZ4EG01EDS3U	k__Bacteria(100);p__Proteobacteria(100);c__Alphaproteobacteria(100);o__Sphingomonadales(100);f__Sphingomonadaceae(100);g__Sphingomonas(97);s__Caulobacterleidyi(96);
ICSZ4EG01AXG1I	k__Bacteria(100);unclassified;unclassified;unclassified;unclassified;unclassified;unclassified;
ICSZ4EG01D0AE5	k__Bacteria(100);p__Proteobacteria(100);c__Betaproteobacteria(100);o__Burkholderiales(100);f__Comamonadaceae(97);unclassified;unclassified;
ICSZ4EG01DPT3Y	k__Bacteria(100);p__Proteobacteria(100);c__Betaproteobacteria(100);o__Burkholderiales(100);f__Comamonadaceae(100);g__Diaphorobacter(97);unclassified;
ICSZ4EG01DP9EF	k__Bacteria(100);p__Proteobacteria(100);c__Alphaproteobacteria(99);o__Sphingomonadales(99);f__Sphingomonadaceae(99);g__Sphingomonas(98);s__Caulobacterleidyi(98);
ICSZ4EG01DBXB9	k__Bacteria(100);p__Firmicutes(81);unclassified;unclassified;unclassified;unclassified;unclassified;
ICSZ4EG01CYQ0K	k__Bacteria(100);p__Proteobacteria(100);c__Betaproteobacteria(100);o__Burkholderiales(100);f__Comamonadaceae(100);g__Acidovorax(92);unclassified;
ICSZ4EG01CKHV6	k__Bacteria(100);p__Proteobacteria(100);c__Alphaproteobacteria(100);o__Sphingomonadales(100);f__Sphingomonadaceae(99);g__Sphingomonas(88);unclassified;
ICSZ4EG01BFHWN	k__Bacteria(100);p__Proteobacteria(100);c__Alphaproteobacteria(100);o__Sphingomonadales(85);f__Sphingomonadaceae(85);g__Sphingomonas(85);s__Caulobacterleidyi(85);
ICSZ4EG01EYMHU	k__Bacteria(100);p__Proteobacteria(100);c__Alphaproteobacteria(100);o__Rhizobiales(100);unclassified;unclassified;unclassified;
ICSZ4EG01D2RKT	k__Bacteria(100);p__Proteobacteria(100);c__Alphaproteobacteria(100);o__Sphingomonadales(100);f__Sphingomonadaceae(100);unclassified;unclassified;
ICSZ4EG01BJ6YP	k__Bacteria(100);p__Proteobacteria(100);c__Betaproteobacteria(99);o__Burkholderiales(98);unclassified;unclassified;unclassified;
ICSZ4EG01BCXAO	k__Bacteria(100);p__Proteobacteria(100);c__Alphaproteobacteria(100);o__Sphingomonadales(100);f__Sphingomonadaceae(100);g__Sphingomonas(100);s__Caulobacterleidyi(100);
ICSZ4EG01DN387	k__Bacteria(100);p__Proteobacteria(100);c__Betaproteobacteria(100);o__Burkholderiales(100);f__Comamonadaceae(100);g__Acidovorax(95);s__Acidovoraxcaen(90);
ICSZ4EG01B9WB6	k__Bacteria(100);p__Proteobacteria(100);c__Alphaproteobacteria(100);o__Sphingomonadales(100);f__Sphingomonadaceae(100);unclassified;unclassified;
ICSZ4EG01EUP5A	k__Bacteria(100);p__Proteobacteria(100);c__Alphaproteobacteria(100);o__Sphingomonadales(100);f__Sphingomonadaceae(100);g__Sphingomonas(98);s__Caulobacterleidyi(98);
ICSZ4EG01EUIKZ	k__Bacteria(100);p__Firmicutes(88);c__Bacilli(88);o__Lactobacillales(87);unclassified;unclassified;unclassified;
ICSZ4EG01ENXO1	k__Bacteria(100);p__Proteobacteria(100);c__Betaproteobacteria(100);o__Burkholderiales(100);f__Comamonadaceae(100);g__Diaphorobacter(100);unclassified;
ICSZ4EG01ELVJQ	k__Bacteria(100);p__Proteobacteria(100);c__Betaproteobacteria(100);o__Burkholderiales(95);f__Comamonadaceae(83);unclassified;unclassified;
ICSZ4EG01EKUCH	k__Bacteria(100);p__Firmicutes(87);c__Clostridia(86);o__Clostridiales(86);f__Lachnospiraceae(81);unclassified;unclassified;
ICSZ4EG01EKROB	k__Bacteria(97);unclassified;unclassified;unclassified;unclassified;unclassified;unclassified;
ICSZ4EG01EHRP8	k__Bacteria(100);p__Proteobacteria(100);c__Alphaproteobacteria(100);o__Sphingomonadales(100);f__Sphingomonadaceae(100);g__Sphingomonas(99);s__Caulobacterleidyi(99);
ICSZ4EG01EH05R	k__Bacteria(100);p__Proteobacteria(100);c__Alphaproteobacteria(100);o__Sphingomonadales(100);f__Sphingomonadaceae(99);g__Sphingomonas(99);s__Caulobacterleidyi(99);
ICSZ4EG01EEPV8	k__Bacteria(100);p__Proteobacteria(100);c__Betaproteobacteria(100);o__Burkholderiales(100);f__Comamonadaceae(100);g__Acidovorax(92);unclassified;
ICSZ4EG01EE35F	k__Bacteria(100);p__Proteobacteria(100);c__Betaproteobacteria(100);o__Burkholderiales(100);f__Comamonadaceae(100);g__Diaphorobacter(81);unclassified;
ICSZ4EG01AYGSU	k__Bacteria(100);p__Proteobacteria(100);c__Betaproteobacteria(100);o__Burkholderiales(99);f__Comamonadaceae(92);unclassified;unclassified;
ICSZ4EG01EC1MC	k__Bacteria(100);p__Proteobacteria(100);c__Alphaproteobacteria(100);o__Sphingomonadales(100);f__Sphingomonadaceae(100);g__Sphingomonas(100);s__Caulobacterleidyi(100);
ICSZ4EG01DW1YV	k__Bacteria(100);p__Proteobacteria(100);c__Betaproteobacteria(100);unclassified;unclassified;unclassified;unclassified;
ICSZ4EG01DSGRP	k__Bacteria(100);p__Proteobacteria(100);c__Alphaproteobacteria(100);o__Sphingomonadales(100);f__Sphingomonadaceae(100);unclassified;unclassified;
ICSZ4EG01DP6YO	k__Bacteria(100);p__Proteobacteria(100);c__Alphaproteobacteria(100);o__Sphingomonadales(100);f__Sphingomonadaceae(100);g__Sphingomonas(97);s__Caulobacterleidyi(97);
ICSZ4EG01DKXKB	k__Bacteria(100);p__Proteobacteria(100);c__Alphaproteobacteria(100);o__Sphingomonadales(100);f__Sphingomonadaceae(100);g__Sphingomonas(100);s__Caulobacterleidyi(100);
ICSZ4EG01DHQQK	k__Bacteria(100);p__Firmicutes(100);c__Clostridia(100);o__Clostridiales(100);f__Lachnospiraceae(100);g__Clostridium(100);s__Clostridiumcelerecrescen(100);
ICSZ4EG01DDKXJ	k__Bacteria(100);p__Bacteroidetes(100);c__Flavobacteria(100);o__Flavobacteriales(100);f__Flavobacteriaceae(100);unclassified;unclassified;
ICSZ4EG01DBJDN	k__Bacteria(100);p__Proteobacteria(100);c__Alphaproteobacteria(100);o__Sphingomonadales(100);f__Sphingomonadaceae(100);g__Sphingomonas(100);s__Caulobacterleidyi(100);
ICSZ4EG01DA1YW	k__Bacteria(100);p__Proteobacteria(100);c__Betaproteobacteria(100);o__Burkholderiales(99);unclassified;unclassified;unclassified;
ICSZ4EG01D8VOM	k__Bacteria(100);p__Proteobacteria(100);c__Alphaproteobacteria(100);o__Sphingomonadales(99);f__Sphingomonadaceae(99);g__Sphingomonas(98);s__Caulobacterleidyi(98);
ICSZ4EG01D6E5N	k__Bacteria(100);p__Proteobacteria(100);c__Betaproteobacteria(100);o__Burkholderiales(99);unclassified;unclassified;unclassified;
ICSZ4EG01D2R8T	k__Bacteria(100);p__Proteobacteria(100);c__Betaproteobacteria(100);o__Burkholderiales(100);f__Comamonadaceae(100);g__Acidovorax(84);unclassified;
ICSZ4EG01D293J	k__Bacteria(100);p__Proteobacteria(100);c__Alphaproteobacteria(100);o__Rhizobiales(100);f__Bradyrhizobiaceae(100);unclassified;unclassified;
ICSZ4EG01D0G6U	k__Bacteria(100);unclassified;unclassified;unclassified;unclassified;unclassified;unclassified;
ICSZ4EG01CXGZ5	k__Bacteria(100);p__Proteobacteria(100);c__Alphaproteobacteria(100);o__Sphingomonadales(100);f__Sphingomonadaceae(100);g__Sphingomonas(99);s__Caulobacterleidyi(99);
ICSZ4EG01CV7OB	k__Bacteria(100);p__Proteobacteria(100);c__Betaproteobacteria(100);o__Burkholderiales(100);f__Comamonadaceae(100);g__Acidovorax(97);s__Acidovoraxcaen(82);
ICSZ4EG01CTG8L	k__Bacteria(100);p__Proteobacteria(100);c__Betaproteobacteria(99);o__Burkholderiales(99);f__Comamonadaceae(81);unclassified;unclassified;
ICSZ4EG01CRSJ5	k__Bacteria(100);p__Firmicutes(98);c__Clostridia(97);o__Clostridiales(97);f__Lachnospiraceae(97);unclassified;unclassified;
ICSZ4EG01CPL08	k__Bacteria(100);p__Proteobacteria(100);c__Betaproteobacteria(98);o__Burkholderiales(98);unclassified;unclassified;unclassified;
ICSZ4EG01CNBTV	k__Bacteria(100);p__Proteobacteria(100);c__Alphaproteobacteria(100);o__Rhizobiales(100);f__Bradyrhizobiaceae(84);unclassified;unclassified;
ICSZ4EG01CN47D	k__Bacteria(100);p__Proteobacteria(100);c__Alphaproteobacteria(100);o__Sphingomonadales(100);f__Sphingomonadaceae(100);g__Sphingomonas(97);s__Caulobacterleidyi(97);
ICSZ4EG01CMV7S	k__Bacteria(100);p__Proteobacteria(100);c__Alphaproteobacteria(100);o__Sphingomonadales(100);f__Sphingomonadaceae(100);g__Sphingomonas(96);s__Caulobacterleidyi(94);
ICSZ4EG01CJDMR	k__Bacteria(100);p__Proteobacteria(100);c__Betaproteobacteria(100);o__Burkholderiales(100);f__Burkholderiaceae(98);g__Burkholderia(97);unclassified;
ICSZ4EG01CI61B	k__Bacteria(100);p__Proteobacteria(100);c__Betaproteobacteria(100);o__Burkholderiales(100);f__Comamonadaceae(99);g__Acidovorax(82);unclassified;
ICSZ4EG01CGKHG	k__Bacteria(100);p__Proteobacteria(100);c__Betaproteobacteria(99);o__Burkholderiales(99);unclassified;unclassified;unclassified;
ICSZ4EG01CFMWY	k__Bacteria(100);p__Proteobacteria(100);c__Betaproteobacteria(100);o__Burkholderiales(100);unclassified;unclassified;unclassified;
ICSZ4EG01CFET2	k__Bacteria(100);p__Firmicutes(100);c__Clostridia(100);o__Clostridiales(100);f__Lachnospiraceae(100);unclassified;unclassified;
ICSZ4EG01CAJPS	k__Bacteria(100);p__Proteobacteria(100);c__Alphaproteobacteria(100);o__Sphingomonadales(100);f__Sphingomonadaceae(100);g__Sphingomonas(99);s__Caulobacterleidyi(99);
ICSZ4EG01C8O7V	k__Bacteria(100);p__Proteobacteria(100);c__Betaproteobacteria(100);o__Burkholderiales(100);f__Burkholderiaceae(100);g__Ralstonia(99);unclassified;
ICSZ4EG01C6R55	k__Bacteria(100);p__Proteobacteria(100);c__Alphaproteobacteria(100);o__Sphingomonadales(100);f__Sphingomonadaceae(100);g__Sphingomonas(100);s__Caulobacterleidyi(100);
ICSZ4EG01C5KIC	k__Bacteria(100);p__Proteobacteria(100);c__Betaproteobacteria(100);o__Burkholderiales(100);f__Comamonadaceae(100);unclassified;unclassified;
ICSZ4EG01C47BS	k__Bacteria(100);p__Proteobacteria(100);c__Alphaproteobacteria(100);o__Rhizobiales(100);f__Bradyrhizobiaceae(100);g__Bradyrhizobium(92);s__Bradyrhizobiumelkani(91);
ICSZ4EG01BZ1C2	k__Bacteria(100);p__Proteobacteria(100);c__Alphaproteobacteria(100);o__Sphingomonadales(100);f__Sphingomonadaceae(100);g__Sphingomonas(99);s__Caulobacterleidyi(99);
ICSZ4EG01BYXXQ	k__Bacteria(100);p__Bacteroidetes(100);c__Flavobacteria(100);o__Flavobacteriales(100);f__Flavobacteriaceae(100);unclassified;unclassified;
ICSZ4EG01BVWNT	k__Bacteria(100);p__Proteobacteria(100);c__Betaproteobacteria(100);o__Burkholderiales(100);unclassified;unclassified;unclassified;
ICSZ4EG01BVOCV	k__Bacteria(100);p__Proteobacteria(100);c__Alphaproteobacteria(100);o__Sphingomonadales(100);f__Sphingomonadaceae(98);unclassified;unclassified;
ICSZ4EG01BVM5S	k__Bacteria(100);p__Proteobacteria(100);c__Betaproteobacteria(100);o__Burkholderiales(100);f__Comamonadaceae(100);unclassified;unclassified;
ICSZ4EG01BUZFR	k__Bacteria(100);p__Proteobacteria(99);c__Alphaproteobacteria(99);o__Sphingomonadales(99);f__Sphingomonadaceae(99);g__Sphingomonas(99);s__Caulobacterleidyi(99);
ICSZ4EG01BRNJK	k__Bacteria(100);p__Proteobacteria(99);c__Betaproteobacteria(99);o__Burkholderiales(99);unclassified;unclassified;unclassified;
ICSZ4EG01BP8YT	k__Bacteria(100);p__Proteobacteria(100);c__Alphaproteobacteria(100);o__Rhizobiales(100);f__Bradyrhizobiaceae(100);g__Bradyrhizobium(94);s__Bradyrhizobiumelkani(94);
ICSZ4EG01BMME9	k__Bacteria(100);p__Firmicutes(100);c__Clostridia(100);o__Clostridiales(100);f__Lachnospiraceae(100);g__Clostridium(100);s__Clostridiumcelerecrescen(100);
ICSZ4EG01BM1JJ	k__Bacteria(100);p__Proteobacteria(100);c__Betaproteobacteria(100);o__Burkholderiales(100);f__Comamonadaceae(100);unclassified;unclassified;
ICSZ4EG01BKQSA	k__Bacteria(100);p__Proteobacteria(100);c__Betaproteobacteria(100);o__Burkholderiales(95);unclassified;unclassified;unclassified;
ICSZ4EG01BJPQG	k__Bacteria(100);p__Proteobacteria(100);c__Alphaproteobacteria(100);o__Sphingomonadales(100);f__Sphingomonadaceae(100);g__Sphingomonas(100);s__Caulobacterleidyi(100);
ICSZ4EG01BD27I	k__Bacteria(100);p__Proteobacteria(99);c__Betaproteobacteria(98);o__Burkholderiales(98);unclassified;unclassified;unclassified;
ICSZ4EG01B8JMY	k__Bacteria(100);p__Proteobacteria(100);c__Alphaproteobacteria(100);o__Rhizobiales(99);f__Methylobacteriaceae(86);g__Methylobacterium(86);unclassified;
ICSZ4EG01B7R9J	k__Bacteria(100);p__Proteobacteria(100);c__Betaproteobacteria(100);o__Burkholderiales(100);f__Comamonadaceae(100);unclassified;unclassified;
ICSZ4EG01A5P7I	k__Bacteria(100);p__Proteobacteria(100);c__Betaproteobacteria(100);o__Burkholderiales(99);f__Comamonadaceae(91);unclassified;unclassified;
ICSZ4EG01B6LN9	k__Bacteria(100);p__Proteobacteria(100);c__Alphaproteobacteria(100);o__Sphingomonadales(100);f__Sphingomonadaceae(100);g__Sphingomonas(100);s__Caulobacterleidyi(100);
ICSZ4EG02HL0WJ	k__Bacteria(100);p__Proteobacteria(100);c__Alphaproteobacteria(100);o__Sphingomonadales(100);f__Sphingomonadaceae(98);unclassified;unclassified;
ICSZ4EG01B40P2	k__Bacteria(100);p__Proteobacteria(100);c__Betaproteobacteria(100);o__Burkholderiales(96);unclassified;unclassified;unclassified;
ICSZ4EG01B08NR	k__Bacteria(100);p__Proteobacteria(100);c__Betaproteobacteria(100);o__Burkholderiales(100);f__Comamonadaceae(100);g__Diaphorobacter(95);unclassified;
ICSZ4EG01AUN6C	k__Bacteria(100);p__Proteobacteria(98);c__Betaproteobacteria(92);o__Burkholderiales(91);unclassified;unclassified;unclassified;
ICSZ4EG01AS2TQ	k__Bacteria(100);p__Proteobacteria(100);c__Betaproteobacteria(100);o__Rhodocyclales(100);f__Rhodocyclaceae(100);g__Dechloromonas(100);unclassified;
ICSZ4EG01ANQIC	k__Bacteria(99);p__Bacteroidetes(94);c__Bacteroidia(94);o__Bacteroidales(94);unclassified;unclassified;unclassified;
ICSZ4EG01BYUMP	k__Bacteria(100);p__Proteobacteria(100);c__Betaproteobacteria(100);o__Rhodocyclales(98);f__Rhodocyclaceae(98);g__Dechloromonas(98);unclassified;
ICSZ4EG01AG3J5	k__Bacteria(100);p__Proteobacteria(100);c__Betaproteobacteria(100);o__Burkholderiales(100);f__Comamonadaceae(100);g__Diaphorobacter(97);unclassified;
ICSZ4EG01AFS17	k__Bacteria(100);p__Proteobacteria(100);c__Alphaproteobacteria(100);o__Sphingomonadales(100);f__Sphingomonadaceae(100);g__Sphingomonas(100);s__Caulobacterleidyi(99);
ICSZ4EG01AF54M	k__Bacteria(100);p__Proteobacteria(100);c__Alphaproteobacteria(100);o__Sphingomonadales(100);f__Sphingomonadaceae(100);g__Sphingomonas(99);s__Caulobacterleidyi(99);
ICSZ4EG01A7XPL	k__Bacteria(100);unclassified;unclassified;unclassified;unclassified;unclassified;unclassified;
ICSZ4EG01A6W32	k__Bacteria(100);p__Proteobacteria(100);c__Betaproteobacteria(99);o__Burkholderiales(98);f__Burkholderiaceae(89);g__Ralstonia(83);unclassified;
ICSZ4EG01EUXB2	k__Bacteria(100);p__Proteobacteria(100);c__Betaproteobacteria(100);o__Burkholderiales(100);f__Comamonadaceae(100);g__Pelomonas(98);unclassified;
ICSZ4EG01BWODK	k__Bacteria(100);p__Cyanobacteria(100);c__4C0d-2(100);o__mle1-12(100);unclassified;unclassified;unclassified;
ICSZ4EG01EXS5P	k__Bacteria(100);p__Firmicutes(100);c__Bacilli(100);o__Lactobacillales(100);f__Enterococcaceae(100);g__Enterococcus(100);s__Enterococcuscecoru(100);
ICSZ4EG01EQ66T	k__Bacteria(98);unclassified;unclassified;unclassified;unclassified;unclassified;unclassified;
ICSZ4EG01A2TZD	k__Bacteria(100);p__Proteobacteria(100);c__Betaproteobacteria(97);unclassified;unclassified;unclassified;unclassified;
ICSZ4EG01EUFDI	k__Bacteria(100);p__Proteobacteria(100);c__Betaproteobacteria(100);o__Burkholderiales(100);f__Comamonadaceae(92);unclassified;unclassified;
ICSZ4EG01CC4U9	k__Bacteria(99);p__Actinobacteria(98);c__Actinobacteria(98);o__Actinomycetales(95);f__Actinomycetaceae(87);unclassified;unclassified;
ICSZ4EG01EIOCJ	k__Bacteria(100);p__Acidobacteria(100);c__Chloracidobacteria(100);unclassified;unclassified;unclassified;unclassified;
ICSZ4EG01EW6SW	k__Bacteria(100);p__Proteobacteria(100);c__Betaproteobacteria(100);o__Burkholderiales(100);f__Comamonadaceae(85);g__Pelomonas(83);unclassified;
ICSZ4EG01EUIFX	k__Bacteria(100);p__Proteobacteria(100);c__Betaproteobacteria(100);o__Burkholderiales(100);f__Comamonadaceae(95);unclassified;unclassified;
ICSZ4EG01CYVUK	k__Bacteria(100);p__Proteobacteria(100);c__Betaproteobacteria(100);o__Burkholderiales(99);f__Comamonadaceae(94);unclassified;unclassified;
ICSZ4EG01ES9M5	k__Bacteria(100);p__Proteobacteria(100);c__Betaproteobacteria(100);o__Burkholderiales(100);f__Alcaligenaceae(100);g__Achromobacter(100);unclassified;
ICSZ4EG01EKHJA	k__Bacteria(100);p__Proteobacteria(100);c__Betaproteobacteria(100);o__Burkholderiales(100);f__Comamonadaceae(100);g__Acidovorax(94);unclassified;
ICSZ4EG01EAI47	k__Bacteria(100);p__Proteobacteria(100);c__Betaproteobacteria(100);o__Burkholderiales(100);f__Comamonadaceae(100);unclassified;unclassified;
ICSZ4EG01DAEZX	k__Bacteria(100);p__Proteobacteria(100);c__Betaproteobacteria(100);o__Burkholderiales(100);f__Comamonadaceae(100);g__Acidovorax(88);unclassified;
ICSZ4EG01B664P	k__Bacteria(100);p__Actinobacteria(100);c__Actinobacteria(100);o__Actinomycetales(100);f__Micrococcaceae(100);g__Micrococcus(99);s__Micrococcusluteu(99);
ICSZ4EG01DTI2W	k__Bacteria(100);p__Proteobacteria(100);c__Betaproteobacteria(100);o__Burkholderiales(100);f__Comamonadaceae(100);g__Acidovorax(96);unclassified;
ICSZ4EG01DAI2C	k__Bacteria(100);p__Proteobacteria(100);c__Betaproteobacteria(100);o__Burkholderiales(100);f__Comamonadaceae(99);unclassified;unclassified;
ICSZ4EG01D610D	k__Bacteria(100);p__Proteobacteria(100);c__Betaproteobacteria(100);o__Burkholderiales(100);f__Comamonadaceae(100);unclassified;unclassified;
ICSZ4EG01CPI8H	k__Bacteria(100);p__Actinobacteria(100);c__Actinobacteria(100);o__Actinomycetales(100);f__Propionibacteriaceae(100);g__Propionibacterium(100);s__Propionibacteriumacne(100);
ICSZ4EG01CYKPB	k__Bacteria(100);p__Proteobacteria(100);c__Betaproteobacteria(100);o__Burkholderiales(100);f__Comamonadaceae(91);unclassified;unclassified;
ICSZ4EG01BZE8N	k__Bacteria(100);p__Proteobacteria(100);c__Alphaproteobacteria(100);o__Sphingomonadales(100);f__Sphingomonadaceae(100);g__Sphingomonas(98);s__Caulobacterleidyi(98);
ICSZ4EG01C5A3G	k__Bacteria(100);p__Bacteroidetes(100);c__Bacteroidia(100);o__Bacteroidales(100);f__Prevotellaceae(100);g__Prevotella(100);unclassified;
ICSZ4EG01A610H	k__Bacteria(100);p__Proteobacteria(100);c__Betaproteobacteria(100);o__Burkholderiales(99);f__Comamonadaceae(99);unclassified;unclassified;
ICSZ4EG01B28UF	k__Bacteria(100);p__Proteobacteria(100);c__Betaproteobacteria(100);o__Burkholderiales(100);f__Comamonadaceae(100);g__Acidovorax(96);unclassified;
ICSZ4EG01EXQ2Z	k__Bacteria(100);p__Proteobacteria(100);c__Betaproteobacteria(100);o__Burkholderiales(100);f__Comamonadaceae(100);g__Diaphorobacter(97);unclassified;
ICSZ4EG01EVV19	k__Bacteria(100);p__Proteobacteria(100);c__Betaproteobacteria(100);o__Burkholderiales(100);f__Comamonadaceae(100);g__Acidovorax(90);unclassified;
ICSZ4EG01ETJMW	k__Bacteria(100);p__Proteobacteria(100);c__Betaproteobacteria(100);o__Burkholderiales(98);f__Comamonadaceae(98);g__Pelomonas(94);unclassified;
ICSZ4EG01ESHWQ	k__Bacteria(100);p__Proteobacteria(100);c__Betaproteobacteria(99);o__Burkholderiales(99);unclassified;unclassified;unclassified;
ICSZ4EG01EP9K0	k__Bacteria(100);p__Proteobacteria(100);c__Betaproteobacteria(100);o__Burkholderiales(100);f__Alcaligenaceae(100);g__Achromobacter(96);unclassified;
ICSZ4EG01EOUWK	k__Bacteria(100);p__Proteobacteria(100);c__Alphaproteobacteria(100);o__Rhizobiales(100);f__Bradyrhizobiaceae(100);g__Bosea(100);unclassified;
ICSZ4EG01EO9J9	k__Bacteria(100);p__Proteobacteria(100);c__Betaproteobacteria(100);o__Burkholderiales(100);f__Comamonadaceae(100);unclassified;unclassified;
ICSZ4EG01DTY1Y	k__Bacteria(100);p__Proteobacteria(100);c__Betaproteobacteria(100);o__Burkholderiales(100);f__Comamonadaceae(100);g__Diaphorobacter(96);unclassified;
ICSZ4EG01ELZ0Q	k__Bacteria(100);p__Proteobacteria(100);c__Betaproteobacteria(100);o__Burkholderiales(100);f__Comamonadaceae(100);g__Acidovorax(87);unclassified;
ICSZ4EG01ELUQZ	k__Bacteria(100);p__Proteobacteria(100);c__Betaproteobacteria(100);o__Burkholderiales(100);f__Comamonadaceae(100);g__Acidovorax(98);unclassified;
ICSZ4EG01CP0EM	k__Bacteria(100);p__Cyanobacteria(99);c__4C0d-2(98);o__mle1-12(98);unclassified;unclassified;unclassified;
ICSZ4EG01EJ3NP	k__Bacteria(100);p__Proteobacteria(100);c__Betaproteobacteria(99);o__Burkholderiales(98);unclassified;unclassified;unclassified;
ICSZ4EG01EIVEI	k__Bacteria(100);p__Proteobacteria(100);c__Betaproteobacteria(100);o__Burkholderiales(100);f__Comamonadaceae(98);g__Pelomonas(91);unclassified;
ICSZ4EG01EHPQR	k__Bacteria(100);p__Proteobacteria(100);c__Betaproteobacteria(100);o__Burkholderiales(100);unclassified;unclassified;unclassified;
ICSZ4EG01EGJQ5	k__Bacteria(100);p__Proteobacteria(100);c__Betaproteobacteria(100);o__Burkholderiales(100);f__Comamonadaceae(100);g__Acidovorax(98);unclassified;
ICSZ4EG01EFG5S	k__Bacteria(100);p__Bacteroidetes(100);c__Flavobacteria(100);o__Flavobacteriales(100);f__Flavobacteriaceae(100);unclassified;unclassified;
ICSZ4EG01EFBMM	k__Bacteria(100);p__Proteobacteria(100);c__Betaproteobacteria(100);o__Burkholderiales(100);f__Comamonadaceae(100);unclassified;unclassified;
ICSZ4EG01EF8RR	k__Bacteria(100);p__Proteobacteria(100);c__Betaproteobacteria(99);o__Burkholderiales(97);unclassified;unclassified;unclassified;
ICSZ4EG01EDHMJ	k__Bacteria(100);p__Proteobacteria(100);c__Betaproteobacteria(100);o__Burkholderiales(98);f__Comamonadaceae(85);unclassified;unclassified;
ICSZ4EG01EC03M	k__Bacteria(100);p__Bacteroidetes(100);c__Flavobacteria(100);o__Flavobacteriales(100);f__Flavobacteriaceae(100);unclassified;unclassified;
ICSZ4EG01EAXF5	k__Bacteria(100);p__Proteobacteria(100);c__Betaproteobacteria(99);o__Burkholderiales(99);f__Comamonadaceae(99);unclassified;unclassified;
ICSZ4EG01EAPCC	k__Bacteria(100);p__Bacteroidetes(100);c__Flavobacteria(100);o__Flavobacteriales(100);f__Flavobacteriaceae(100);unclassified;unclassified;
ICSZ4EG01EA8DF	k__Bacteria(100);p__Proteobacteria(99);c__Betaproteobacteria(98);o__Burkholderiales(93);unclassified;unclassified;unclassified;
ICSZ4EG01DYNNS	k__Bacteria(100);p__Proteobacteria(100);c__Betaproteobacteria(100);o__Burkholderiales(100);f__Comamonadaceae(100);unclassified;unclassified;
ICSZ4EG01DXSFP	k__Bacteria(100);p__Proteobacteria(100);c__Betaproteobacteria(100);o__Burkholderiales(100);f__Comamonadaceae(97);g__Pelomonas(86);unclassified;
ICSZ4EG01DVWVE	k__Bacteria(100);p__Proteobacteria(100);c__Betaproteobacteria(100);o__Burkholderiales(100);f__Comamonadaceae(100);g__Acidovorax(91);unclassified;
ICSZ4EG01DV3ZJ	k__Bacteria(100);p__Bacteroidetes(100);c__Flavobacteria(100);o__Flavobacteriales(100);f__Flavobacteriaceae(100);unclassified;unclassified;
ICSZ4EG01DUP8K	k__Bacteria(100);p__Proteobacteria(100);c__Betaproteobacteria(100);o__Burkholderiales(100);f__Comamonadaceae(100);unclassified;unclassified;
ICSZ4EG01DTJK7	k__Bacteria(100);p__Bacteroidetes(100);c__Flavobacteria(100);o__Flavobacteriales(100);f__Flavobacteriaceae(100);unclassified;unclassified;
ICSZ4EG01DT6KJ	k__Bacteria(100);p__Proteobacteria(100);c__Betaproteobacteria(100);o__Burkholderiales(100);f__Comamonadaceae(100);g__Acidovorax(96);unclassified;
ICSZ4EG01DRK4H	k__Bacteria(100);p__Firmicutes(100);c__Bacilli(100);o__Lactobacillales(100);f__Enterococcaceae(100);g__Enterococcus(100);s__Enterococcuscecoru(99);
ICSZ4EG01DRGUL	k__Bacteria(100);p__Bacteroidetes(100);c__Flavobacteria(100);o__Flavobacteriales(100);f__Flavobacteriaceae(100);unclassified;unclassified;
ICSZ4EG01DQ8JY	k__Bacteria(100);p__Proteobacteria(100);c__Betaproteobacteria(100);o__Burkholderiales(100);f__Comamonadaceae(100);g__Acidovorax(97);unclassified;
ICSZ4EG01DM75O	k__Bacteria(100);p__Bacteroidetes(100);c__Flavobacteria(100);o__Flavobacteriales(100);f__Flavobacteriaceae(100);unclassified;unclassified;
ICSZ4EG01DLMWJ	k__Bacteria(100);p__Proteobacteria(100);c__Betaproteobacteria(100);o__Burkholderiales(100);f__Comamonadaceae(100);unclassified;unclassified;
ICSZ4EG01DJPUN	k__Bacteria(100);p__Bacteroidetes(100);c__Flavobacteria(100);o__Flavobacteriales(100);f__Flavobacteriaceae(100);unclassified;unclassified;
ICSZ4EG01DHM1J	k__Bacteria(100);p__Firmicutes(100);c__Bacilli(100);o__Lactobacillales(100);f__Enterococcaceae(100);g__Enterococcus(100);s__Enterococcuscecoru(99);
ICSZ4EG01AK2FO	k__Bacteria(100);p__Proteobacteria(100);c__Betaproteobacteria(100);o__Burkholderiales(100);f__Comamonadaceae(100);unclassified;unclassified;
ICSZ4EG01DFN2I	k__Bacteria(100);p__Proteobacteria(100);c__Betaproteobacteria(99);o__Burkholderiales(97);unclassified;unclassified;unclassified;
ICSZ4EG01DDIYA	k__Bacteria(100);p__Proteobacteria(98);c__Betaproteobacteria(97);o__Burkholderiales(96);unclassified;unclassified;unclassified;
ICSZ4EG01D7V03	k__Bacteria(100);p__Proteobacteria(100);c__Betaproteobacteria(100);o__Burkholderiales(100);f__Comamonadaceae(100);g__Diaphorobacter(100);unclassified;
ICSZ4EG01D7NCW	k__Bacteria(100);p__Proteobacteria(100);c__Alphaproteobacteria(100);o__Sphingomonadales(100);f__Sphingomonadaceae(100);g__Sphingomonas(99);s__Caulobacterleidyi(99);
ICSZ4EG01D7ISF	k__Bacteria(100);p__Proteobacteria(100);c__Betaproteobacteria(100);o__Burkholderiales(100);f__Comamonadaceae(100);g__Diaphorobacter(98);unclassified;
ICSZ4EG01D45I8	k__Bacteria(100);p__Bacteroidetes(100);c__Flavobacteria(100);o__Flavobacteriales(100);f__Flavobacteriaceae(100);unclassified;unclassified;
ICSZ4EG01D3D3W	k__Bacteria(100);p__Proteobacteria(100);c__Betaproteobacteria(100);o__Burkholderiales(100);f__Comamonadaceae(100);g__Acidovorax(96);unclassified;
ICSZ4EG01D0XRI	k__Bacteria(100);p__Proteobacteria(100);c__Betaproteobacteria(100);o__Burkholderiales(100);f__Comamonadaceae(100);g__Acidovorax(83);unclassified;
ICSZ4EG01CXWBE	k__Bacteria(100);p__Proteobacteria(100);c__Betaproteobacteria(100);o__Burkholderiales(100);f__Comamonadaceae(100);g__Acidovorax(80);unclassified;
ICSZ4EG01CVS3E	k__Bacteria(100);p__Proteobacteria(100);c__Alphaproteobacteria(100);o__Sphingomonadales(100);f__Sphingomonadaceae(100);g__Sphingomonas(100);s__Caulobacterleidyi(100);
ICSZ4EG01CTRX2	k__Bacteria(100);p__Bacteroidetes(100);c__Flavobacteria(100);o__Flavobacteriales(100);f__Flavobacteriaceae(100);unclassified;unclassified;
ICSZ4EG01CRGGN	k__Bacteria(100);p__Proteobacteria(100);c__Betaproteobacteria(100);o__Burkholderiales(100);f__Comamonadaceae(100);g__Acidovorax(89);unclassified;
ICSZ4EG01CNTUL	k__Bacteria(100);p__Proteobacteria(100);c__Betaproteobacteria(100);o__Burkholderiales(100);f__Comamonadaceae(100);g__Acidovorax(80);unclassified;
ICSZ4EG01CMXQ5	k__Bacteria(100);p__Proteobacteria(100);c__Betaproteobacteria(100);o__Burkholderiales(100);f__Comamonadaceae(100);g__Acidovorax(91);unclassified;
ICSZ4EG01CKYBE	k__Bacteria(100);p__Proteobacteria(100);c__Betaproteobacteria(100);o__Burkholderiales(100);f__Comamonadaceae(100);g__Acidovorax(92);unclassified;
ICSZ4EG01CJTRQ	k__Bacteria(100);p__Proteobacteria(100);c__Betaproteobacteria(100);o__Burkholderiales(99);unclassified;unclassified;unclassified;
ICSZ4EG01CI701	k__Bacteria(100);p__Proteobacteria(100);c__Alphaproteobacteria(100);o__Sphingomonadales(100);f__Sphingomonadaceae(100);g__Sphingomonas(99);s__Caulobacterleidyi(99);
ICSZ4EG01CFPV2	k__Bacteria(100);p__Proteobacteria(100);c__Betaproteobacteria(100);o__Burkholderiales(100);f__Comamonadaceae(100);g__Acidovorax(96);unclassified;
ICSZ4EG01CDLFT	k__Bacteria(100);p__Bacteroidetes(100);c__Bacteroidia(100);o__Bacteroidales(100);f__Prevotellaceae(96);g__Prevotella(96);unclassified;
ICSZ4EG01C9T7M	k__Bacteria(100);p__Proteobacteria(100);c__Betaproteobacteria(99);o__Burkholderiales(98);unclassified;unclassified;unclassified;
ICSZ4EG01C99SI	k__Bacteria(100);p__Proteobacteria(100);c__Betaproteobacteria(100);o__Burkholderiales(100);f__Comamonadaceae(100);unclassified;unclassified;
ICSZ4EG01C8TV3	k__Bacteria(100);p__Bacteroidetes(100);c__Flavobacteria(100);o__Flavobacteriales(100);f__Flavobacteriaceae(100);unclassified;unclassified;
ICSZ4EG01C62ZJ	k__Bacteria(100);p__Proteobacteria(100);c__Betaproteobacteria(100);o__Burkholderiales(100);f__Comamonadaceae(100);g__Acidovorax(96);unclassified;
ICSZ4EG01C5M9W	k__Bacteria(100);p__Proteobacteria(100);c__Betaproteobacteria(100);o__Burkholderiales(100);f__Comamonadaceae(100);g__Pelomonas(98);unclassified;
ICSZ4EG01C5HSG	k__Bacteria(100);p__Bacteroidetes(100);c__Bacteroidia(100);o__Bacteroidales(100);f__Prevotellaceae(98);g__Prevotella(98);unclassified;
ICSZ4EG01C4OAJ	k__Bacteria(100);p__Proteobacteria(100);c__Betaproteobacteria(99);o__Burkholderiales(98);unclassified;unclassified;unclassified;
ICSZ4EG01ET3GW	k__Bacteria(100);p__Proteobacteria(100);c__Betaproteobacteria(99);o__Burkholderiales(99);unclassified;unclassified;unclassified;
ICSZ4EG01C4IDC	k__Bacteria(100);p__Actinobacteria(100);c__Actinobacteria(100);o__Actinomycetales(100);f__Corynebacteriaceae(96);g__Corynebacterium(96);unclassified;
ICSZ4EG01C2SV0	k__Bacteria(100);p__Proteobacteria(100);c__Betaproteobacteria(100);o__Burkholderiales(100);f__Comamonadaceae(100);g__Pelomonas(89);unclassified;
ICSZ4EG01C2QNE	k__Bacteria(100);p__Proteobacteria(100);c__Betaproteobacteria(100);o__Burkholderiales(100);f__Comamonadaceae(100);unclassified;unclassified;
ICSZ4EG01BW7SW	k__Bacteria(100);p__Proteobacteria(100);c__Betaproteobacteria(100);o__Burkholderiales(100);f__Comamonadaceae(86);unclassified;unclassified;
ICSZ4EG01BUDK6	k__Bacteria(100);p__Proteobacteria(100);c__Betaproteobacteria(100);o__Burkholderiales(100);f__Comamonadaceae(100);g__Acidovorax(87);unclassified;
ICSZ4EG01BSOX8	k__Bacteria(100);p__Bacteroidetes(89);c__Bacteroidia(88);o__Bacteroidales(88);f__Prevotellaceae(85);g__Prevotella(85);unclassified;
ICSZ4EG01BRV5Y	k__Bacteria(100);p__Proteobacteria(100);c__Betaproteobacteria(100);o__Burkholderiales(100);f__Comamonadaceae(100);g__Acidovorax(91);unclassified;
ICSZ4EG01BRFO3	k__Bacteria(100);p__Proteobacteria(100);c__Betaproteobacteria(100);o__Burkholderiales(100);f__Comamonadaceae(100);g__Acidovorax(94);unclassified;
ICSZ4EG01BQXA2	k__Bacteria(100);p__Proteobacteria(100);c__Alphaproteobacteria(100);o__Sphingomonadales(97);f__Sphingomonadaceae(96);g__Sphingomonas(96);s__Caulobacterleidyi(96);
ICSZ4EG01BPS8Q	k__Bacteria(100);p__Bacteroidetes(100);c__Flavobacteria(100);o__Flavobacteriales(100);f__Flavobacteriaceae(100);unclassified;unclassified;
ICSZ4EG01BNZF8	k__Bacteria(100);p__Proteobacteria(100);c__Betaproteobacteria(100);o__Burkholderiales(100);f__Comamonadaceae(100);g__Acidovorax(92);unclassified;
ICSZ4EG01BNT3M	k__Bacteria(100);p__Bacteroidetes(100);c__Flavobacteria(100);o__Flavobacteriales(100);f__Flavobacteriaceae(100);unclassified;unclassified;
ICSZ4EG01BNJPG	k__Bacteria(100);p__Proteobacteria(100);c__Betaproteobacteria(99);o__Burkholderiales(97);unclassified;unclassified;unclassified;
ICSZ4EG01BMRID	k__Bacteria(100);p__Bacteroidetes(100);c__Flavobacteria(100);o__Flavobacteriales(100);f__Flavobacteriaceae(100);unclassified;unclassified;
ICSZ4EG01BMQIR	k__Bacteria(100);p__Proteobacteria(100);c__Betaproteobacteria(100);o__Burkholderiales(100);f__Comamonadaceae(100);g__Diaphorobacter(99);unclassified;
ICSZ4EG01ARM8Y	k__Bacteria(100);p__Proteobacteria(100);c__Betaproteobacteria(100);o__Burkholderiales(100);f__Comamonadaceae(98);g__Acidovorax(86);unclassified;
ICSZ4EG01BIVXX	k__Bacteria(100);p__Proteobacteria(100);c__Betaproteobacteria(100);o__Burkholderiales(100);f__Comamonadaceae(99);g__Acidovorax(91);s__Acidovoraxcaen(87);
ICSZ4EG01BHLCV	k__Bacteria(100);p__Proteobacteria(100);c__Betaproteobacteria(100);o__Burkholderiales(100);unclassified;unclassified;unclassified;
ICSZ4EG01BF0MY	k__Bacteria(100);p__Bacteroidetes(100);c__Bacteroidia(100);o__Bacteroidales(100);f__Prevotellaceae(97);g__Prevotella(97);unclassified;
ICSZ4EG01BATEY	k__Bacteria(100);p__Bacteroidetes(100);c__Flavobacteria(100);o__Flavobacteriales(100);f__Flavobacteriaceae(100);unclassified;unclassified;
ICSZ4EG01B8PXC	k__Bacteria(100);p__Proteobacteria(100);c__Betaproteobacteria(100);o__Burkholderiales(99);unclassified;unclassified;unclassified;
ICSZ4EG01B5D6V	k__Bacteria(100);p__Proteobacteria(100);c__Betaproteobacteria(100);o__Burkholderiales(98);f__Comamonadaceae(98);g__Pelomonas(96);unclassified;
ICSZ4EG01B55T7	k__Bacteria(100);p__Proteobacteria(100);c__Betaproteobacteria(100);o__Burkholderiales(100);f__Comamonadaceae(100);unclassified;unclassified;
ICSZ4EG01B4X5W	k__Bacteria(100);p__Proteobacteria(100);c__Betaproteobacteria(98);o__Burkholderiales(97);unclassified;unclassified;unclassified;
ICSZ4EG01B4E4I	k__Bacteria(99);p__Proteobacteria(99);c__Betaproteobacteria(94);unclassified;unclassified;unclassified;unclassified;
ICSZ4EG01B3V9L	k__Bacteria(100);p__Proteobacteria(100);c__Betaproteobacteria(100);o__Burkholderiales(100);unclassified;unclassified;unclassified;
ICSZ4EG01B2V6J	k__Bacteria(100);p__Proteobacteria(100);c__Betaproteobacteria(100);o__Burkholderiales(100);f__Comamonadaceae(100);g__Acidovorax(89);unclassified;
ICSZ4EG01B2D35	k__Bacteria(100);p__Proteobacteria(100);c__Betaproteobacteria(100);o__Burkholderiales(100);f__Comamonadaceae(100);g__Acidovorax(90);unclassified;
ICSZ4EG01B03E3	k__Bacteria(100);p__Bacteroidetes(100);c__Flavobacteria(100);o__Flavobacteriales(100);f__Flavobacteriaceae(100);unclassified;unclassified;
ICSZ4EG01AZ69P	k__Bacteria(100);p__Bacteroidetes(100);c__Flavobacteria(100);o__Flavobacteriales(100);f__Flavobacteriaceae(100);unclassified;unclassified;
ICSZ4EG01AYXEH	k__Bacteria(100);p__Proteobacteria(100);c__Betaproteobacteria(100);o__Burkholderiales(100);f__Comamonadaceae(100);g__Acidovorax(97);unclassified;
ICSZ4EG01AVQF6	k__Bacteria(100);p__Proteobacteria(100);c__Betaproteobacteria(99);o__Burkholderiales(94);unclassified;unclassified;unclassified;
ICSZ4EG01AVOPK	k__Bacteria(100);p__Proteobacteria(100);c__Betaproteobacteria(100);o__Burkholderiales(100);f__Comamonadaceae(100);g__Pelomonas(83);unclassified;
ICSZ4EG01AUHHV	k__Bacteria(100);p__Proteobacteria(100);c__Alphaproteobacteria(100);o__Sphingomonadales(100);f__Sphingomonadaceae(99);g__Sphingomonas(99);s__Caulobacterleidyi(99);
ICSZ4EG01AT13Y	k__Bacteria(100);p__Proteobacteria(100);c__Betaproteobacteria(100);o__Burkholderiales(100);f__Comamonadaceae(100);g__Acidovorax(90);unclassified;
ICSZ4EG01ASGAG	k__Bacteria(98);p__Bacteroidetes(84);c__Bacteroidia(83);o__Bacteroidales(83);unclassified;unclassified;unclassified;
ICSZ4EG01AS7PQ	k__Bacteria(100);p__Proteobacteria(100);c__Betaproteobacteria(100);o__Burkholderiales(100);f__Comamonadaceae(100);g__Acidovorax(86);unclassified;
ICSZ4EG01ARONR	k__Bacteria(100);p__Proteobacteria(100);c__Betaproteobacteria(100);o__Burkholderiales(100);unclassified;unclassified;unclassified;
ICSZ4EG01APA66	k__Bacteria(100);p__Proteobacteria(100);c__Betaproteobacteria(100);o__Burkholderiales(99);f__Comamonadaceae(83);unclassified;unclassified;
ICSZ4EG01ANZG1	k__Bacteria(100);p__Proteobacteria(100);c__Betaproteobacteria(100);o__Burkholderiales(100);unclassified;unclassified;unclassified;
ICSZ4EG01AMBCS	k__Bacteria(100);p__Bacteroidetes(100);c__Flavobacteria(100);o__Flavobacteriales(100);f__Flavobacteriaceae(100);unclassified;unclassified;
ICSZ4EG01AM1K0	k__Bacteria(100);p__Bacteroidetes(100);c__Flavobacteria(100);o__Flavobacteriales(100);f__Flavobacteriaceae(100);unclassified;unclassified;
ICSZ4EG01AFVPN	k__Bacteria(100);p__Proteobacteria(100);c__Betaproteobacteria(100);o__Burkholderiales(100);f__Comamonadaceae(100);unclassified;unclassified;
ICSZ4EG01A7T52	k__Bacteria(100);p__Proteobacteria(100);c__Alphaproteobacteria(100);o__Sphingomonadales(100);f__Sphingomonadaceae(100);g__Sphingomonas(98);s__Caulobacterleidyi(98);
ICSZ4EG01A5UD4	k__Bacteria(100);p__Proteobacteria(100);c__Betaproteobacteria(100);o__Burkholderiales(100);f__Comamonadaceae(100);g__Acidovorax(96);unclassified;
ICSZ4EG01A3SWG	k__Bacteria(100);p__Proteobacteria(100);c__Betaproteobacteria(100);o__Burkholderiales(100);f__Comamonadaceae(100);unclassified;unclassified;
ICSZ4EG01A16JL	k__Bacteria(100);p__Proteobacteria(100);c__Betaproteobacteria(100);o__Burkholderiales(100);f__Comamonadaceae(100);g__Acidovorax(89);unclassified;
ICSZ4EG01D00BE	k__Bacteria(100);p__Bacteroidetes(99);c__Bacteroidia(99);o__Bacteroidales(99);f__Prevotellaceae(99);g__Prevotella(99);unclassified;
ICSZ4EG01D4TNJ	k__Bacteria(100);p__Firmicutes(87);c__Clostridia(85);o__Clostridiales(85);f__Lachnospiraceae(84);unclassified;unclassified;
ICSZ4EG01BJ0MW	k__Bacteria(100);p__Proteobacteria(100);c__Betaproteobacteria(100);o__Burkholderiales(100);f__Comamonadaceae(100);g__Comamonas(99);unclassified;
ICSZ4EG01EF3U2	k__Bacteria(100);p__Firmicutes(100);c__Bacilli(100);o__Lactobacillales(100);f__Lactobacillaceae(100);g__Lactobacillus(100);s__Lactobacillusiner(100);
ICSZ4EG01CZHTA	k__Bacteria(100);p__Bacteroidetes(98);c__Sphingobacteria(97);o__Sphingobacteriales(97);unclassified;unclassified;unclassified;
ICSZ4EG01EFS00	k__Bacteria(100);p__Actinobacteria(100);c__Actinobacteria(100);o__Actinomycetales(100);f__Nocardioidaceae(96);g__Marmoricola(93);unclassified;
ICSZ4EG01C8UIG	k__Bacteria(100);p__Proteobacteria(100);c__Betaproteobacteria(100);o__Burkholderiales(98);f__Oxalobacteraceae(98);g__Massilia(98);s__Massiliatimona(98);
ICSZ4EG01APWZ7	k__Bacteria(100);p__Cyanobacteria(100);c__4C0d-2(100);o__mle1-12(100);unclassified;unclassified;unclassified;
ICSZ4EG01AL1VW	k__Bacteria(100);p__Bacteroidetes(99);c__Bacteroidia(99);o__Bacteroidales(99);unclassified;unclassified;unclassified;
ICSZ4EG01A6FLV	k__Bacteria(100);p__Cyanobacteria(100);c__Oscillatoriophycideae(100);o__Oscillatoriales(100);f__Phormidiaceae(100);g__Microcoleus(99);unclassified;
ICSZ4EG01DOZXY	k__Bacteria(100);p__Proteobacteria(100);c__Betaproteobacteria(98);o__Burkholderiales(92);unclassified;unclassified;unclassified;
ICSZ4EG01DIXOI	k__Bacteria(99);unclassified;unclassified;unclassified;unclassified;unclassified;unclassified;
ICSZ4EG01D66FM	k__Bacteria(100);p__Actinobacteria(100);c__Actinobacteria(100);o__Actinomycetales(100);f__Micrococcaceae(100);g__Arthrobacter(100);unclassified;
ICSZ4EG01CYLAO	k__Bacteria(100);p__Actinobacteria(100);c__Actinobacteria(100);o__Actinomycetales(100);unclassified;unclassified;unclassified;
ICSZ4EG01AZJ8L	k__Bacteria(100);p__Proteobacteria(100);c__Betaproteobacteria(99);o__Burkholderiales(98);unclassified;unclassified;unclassified;
ICSZ4EG01BVTCW	k__Bacteria(100);p__Proteobacteria(100);c__Betaproteobacteria(100);o__Burkholderiales(100);f__Comamonadaceae(97);unclassified;unclassified;
ICSZ4EG01A1F1U	k__Bacteria(100);unclassified;unclassified;unclassified;unclassified;unclassified;unclassified;
ICSZ4EG01EU421	k__Bacteria(100);p__Actinobacteria(100);c__Actinobacteria(100);o__Actinomycetales(100);f__Beutenbergiaceae(89);unclassified;unclassified;
ICSZ4EG02HYB60	k__Bacteria(100);p__Proteobacteria(100);c__Betaproteobacteria(100);o__Burkholderiales(96);f__Comamonadaceae(80);unclassified;unclassified;
ICSZ4EG01EO2F3	k__Bacteria(100);p__Proteobacteria(100);c__Betaproteobacteria(99);o__Burkholderiales(97);f__Comamonadaceae(83);unclassified;unclassified;
ICSZ4EG01EKAXL	k__Bacteria(100);p__Proteobacteria(100);c__Alphaproteobacteria(100);o__Sphingomonadales(98);f__Sphingomonadaceae(98);g__Sphingomonas(97);s__Caulobacterleidyi(97);
ICSZ4EG01EISL3	k__Bacteria(100);p__Firmicutes(100);c__Clostridia(100);o__Clostridiales(100);f__Lachnospiraceae(100);g__Clostridium(97);unclassified;
ICSZ4EG01EISGE	k__Bacteria(100);p__Actinobacteria(100);c__Actinobacteria(100);o__Actinomycetales(100);f__Geodermatophilaceae(99);unclassified;unclassified;
ICSZ4EG01EI2VC	k__Bacteria(100);p__Proteobacteria(100);c__Betaproteobacteria(100);unclassified;unclassified;unclassified;unclassified;
ICSZ4EG01EGBL8	k__Bacteria(100);p__Bacteroidetes(100);c__Flavobacteria(100);o__Flavobacteriales(100);f__Flavobacteriaceae(100);unclassified;unclassified;
ICSZ4EG01ECWKB	k__Bacteria(100);p__Proteobacteria(100);c__Betaproteobacteria(100);o__Burkholderiales(100);f__Comamonadaceae(100);g__Acidovorax(89);unclassified;
ICSZ4EG01EAWMU	k__Bacteria(100);p__Proteobacteria(100);c__Betaproteobacteria(100);o__Burkholderiales(100);f__Comamonadaceae(100);unclassified;unclassified;
ICSZ4EG01EAJUL	k__Bacteria(100);p__Proteobacteria(100);c__Betaproteobacteria(100);o__Burkholderiales(98);unclassified;unclassified;unclassified;
ICSZ4EG01E0L1G	k__Bacteria(94);unclassified;unclassified;unclassified;unclassified;unclassified;unclassified;
ICSZ4EG01DY73C	k__Bacteria(100);p__Proteobacteria(99);c__Betaproteobacteria(99);o__Burkholderiales(97);unclassified;unclassified;unclassified;
ICSZ4EG01DX6K0	k__Bacteria(97);unclassified;unclassified;unclassified;unclassified;unclassified;unclassified;
ICSZ4EG01DLK1S	k__Bacteria(100);p__Proteobacteria(100);c__Alphaproteobacteria(100);o__Sphingomonadales(100);f__Sphingomonadaceae(100);g__Sphingomonas(100);s__Caulobacterleidyi(100);
ICSZ4EG01DJHM7	k__Bacteria(100);p__Proteobacteria(98);c__Betaproteobacteria(96);o__Burkholderiales(92);unclassified;unclassified;unclassified;
ICSZ4EG01DJEY0	k__Bacteria(100);p__Proteobacteria(100);c__Alphaproteobacteria(100);o__Rhizobiales(100);f__Phyllobacteriaceae(82);unclassified;unclassified;
ICSZ4EG01DHYQ3	k__Bacteria(100);p__Proteobacteria(100);c__Betaproteobacteria(100);o__Burkholderiales(100);unclassified;unclassified;unclassified;
ICSZ4EG01DH3NE	k__Bacteria(100);p__Proteobacteria(100);c__Betaproteobacteria(100);o__Burkholderiales(100);f__Comamonadaceae(100);g__Acidovorax(96);unclassified;
ICSZ4EG01DG3LU	k__Bacteria(100);p__Proteobacteria(100);c__Betaproteobacteria(100);o__Burkholderiales(100);f__Comamonadaceae(99);g__Diaphorobacter(98);unclassified;
ICSZ4EG01DFBPZ	k__Bacteria(100);p__Proteobacteria(99);c__Betaproteobacteria(99);o__Burkholderiales(98);unclassified;unclassified;unclassified;
ICSZ4EG01DEOB9	k__Bacteria(100);p__Bacteroidetes(98);c__Bacteroidia(98);o__Bacteroidales(98);unclassified;unclassified;unclassified;
ICSZ4EG01DBCMN	k__Bacteria(100);p__Proteobacteria(100);c__Betaproteobacteria(100);o__Burkholderiales(100);f__Comamonadaceae(100);g__Diaphorobacter(99);unclassified;
ICSZ4EG01DB4OS	k__Bacteria(100);p__Proteobacteria(100);c__Alphaproteobacteria(100);o__Sphingomonadales(100);f__Sphingomonadaceae(100);unclassified;unclassified;
ICSZ4EG01D9ZAT	k__Bacteria(100);p__Proteobacteria(100);c__Betaproteobacteria(100);o__Burkholderiales(100);f__Comamonadaceae(100);g__Acidovorax(98);unclassified;
ICSZ4EG01BYOLT	k__Bacteria(100);p__Proteobacteria(100);c__Betaproteobacteria(99);o__Burkholderiales(99);f__Comamonadaceae(94);unclassified;unclassified;
ICSZ4EG01D90JU	k__Bacteria(100);p__Bacteroidetes(100);c__Flavobacteria(100);o__Flavobacteriales(100);f__Flavobacteriaceae(100);g__Chryseobacterium(81);unclassified;
ICSZ4EG01D6DCW	k__Bacteria(100);p__Proteobacteria(100);c__Alphaproteobacteria(100);o__Sphingomonadales(100);f__Sphingomonadaceae(100);g__Sphingomonas(98);s__Caulobacterleidyi(98);
ICSZ4EG01D5QUU	k__Bacteria(100);p__Proteobacteria(100);c__Alphaproteobacteria(100);o__Rhizobiales(100);f__Bradyrhizobiaceae(100);g__Rhodopseudomonas(100);unclassified;
ICSZ4EG01D5MWM	k__Bacteria(97);p__Proteobacteria(90);c__Betaproteobacteria(89);o__Burkholderiales(86);unclassified;unclassified;unclassified;
ICSZ4EG01D5B38	k__Bacteria(100);p__Proteobacteria(99);c__Betaproteobacteria(97);o__Burkholderiales(96);unclassified;unclassified;unclassified;
ICSZ4EG01D4CM3	k__Bacteria(100);p__Proteobacteria(100);c__Alphaproteobacteria(100);o__Sphingomonadales(100);f__Sphingomonadaceae(100);g__Sphingomonas(100);s__Caulobacterleidyi(100);
ICSZ4EG01D3M62	k__Bacteria(100);p__Bacteroidetes(100);c__Flavobacteria(100);o__Flavobacteriales(100);f__Flavobacteriaceae(100);unclassified;unclassified;
ICSZ4EG01CWDRO	k__Bacteria(99);p__Proteobacteria(99);c__Betaproteobacteria(98);o__Burkholderiales(97);unclassified;unclassified;unclassified;
ICSZ4EG01BZG3X	k__Bacteria(100);p__Proteobacteria(100);c__Betaproteobacteria(100);o__Burkholderiales(100);f__Comamonadaceae(100);g__Acidovorax(91);unclassified;
ICSZ4EG01CSAT7	k__Bacteria(100);p__Proteobacteria(100);c__Betaproteobacteria(99);o__Burkholderiales(99);unclassified;unclassified;unclassified;
ICSZ4EG01CQ8KA	k__Bacteria(100);p__Proteobacteria(100);c__Alphaproteobacteria(100);o__Rhizobiales(100);f__Phyllobacteriaceae(95);unclassified;unclassified;
ICSZ4EG01CN7VH	k__Bacteria(100);p__Proteobacteria(100);c__Betaproteobacteria(100);o__Burkholderiales(100);f__Comamonadaceae(100);g__Acidovorax(97);s__Acidovoraxcaen(84);
ICSZ4EG01CLHWK	k__Bacteria(100);p__Proteobacteria(100);c__Alphaproteobacteria(100);o__Sphingomonadales(100);f__Sphingomonadaceae(100);g__Sphingomonas(100);s__Caulobacterleidyi(100);
ICSZ4EG01CKT3W	k__Bacteria(100);p__Proteobacteria(100);c__Betaproteobacteria(100);o__Burkholderiales(100);f__Comamonadaceae(99);g__Diaphorobacter(97);unclassified;
ICSZ4EG01CK1VK	k__Bacteria(100);p__Proteobacteria(100);c__Betaproteobacteria(100);o__Burkholderiales(99);f__Comamonadaceae(98);g__Acidovorax(92);s__Acidovoraxcaen(89);
ICSZ4EG01CAWNN	k__Bacteria(100);p__Firmicutes(100);c__Clostridia(100);o__Clostridiales(100);f__Ruminococcaceae(100);g__Oscillospira(100);unclassified;
ICSZ4EG01C9UGG	k__Bacteria(100);p__Proteobacteria(100);c__Betaproteobacteria(99);o__Burkholderiales(99);unclassified;unclassified;unclassified;
ICSZ4EG01C9P6W	k__Bacteria(100);p__Proteobacteria(100);c__Betaproteobacteria(100);o__Burkholderiales(100);f__Comamonadaceae(99);g__Acidovorax(90);unclassified;
ICSZ4EG01C9HOR	k__Bacteria(100);p__Proteobacteria(100);c__Alphaproteobacteria(100);o__Sphingomonadales(100);f__Sphingomonadaceae(100);g__Sphingomonas(100);s__Caulobacterleidyi(100);
ICSZ4EG01C9GG2	k__Bacteria(99);p__Proteobacteria(99);c__Betaproteobacteria(97);o__Burkholderiales(94);unclassified;unclassified;unclassified;
ICSZ4EG01C587Q	k__Bacteria(100);p__Proteobacteria(99);c__Betaproteobacteria(99);o__Burkholderiales(96);unclassified;unclassified;unclassified;
ICSZ4EG01C56J0	k__Bacteria(100);p__Bacteroidetes(100);c__Flavobacteria(100);o__Flavobacteriales(100);f__Flavobacteriaceae(100);unclassified;unclassified;
ICSZ4EG01C4ZZM	k__Bacteria(100);p__Proteobacteria(100);c__Alphaproteobacteria(100);o__Sphingomonadales(100);f__Sphingomonadaceae(85);unclassified;unclassified;
ICSZ4EG01C4TDB	k__Bacteria(100);p__Proteobacteria(100);c__Betaproteobacteria(98);o__Burkholderiales(98);unclassified;unclassified;unclassified;
ICSZ4EG01C2H2S	k__Bacteria(100);p__Proteobacteria(100);c__Betaproteobacteria(100);o__Burkholderiales(100);f__Comamonadaceae(100);g__Acidovorax(99);s__Acidovoraxcaen(97);
ICSZ4EG01BSZIS	k__Bacteria(100);p__Proteobacteria(99);c__Betaproteobacteria(97);o__Burkholderiales(95);unclassified;unclassified;unclassified;
ICSZ4EG01BQL4E	k__Bacteria(99);p__Proteobacteria(99);c__Betaproteobacteria(96);o__Burkholderiales(96);unclassified;unclassified;unclassified;
ICSZ4EG01B7R2R	k__Bacteria(100);p__Proteobacteria(100);c__Betaproteobacteria(100);o__Burkholderiales(84);unclassified;unclassified;unclassified;
ICSZ4EG02GZAM9	k__Bacteria(100);p__Proteobacteria(100);c__Betaproteobacteria(100);o__Burkholderiales(100);f__Comamonadaceae(100);g__Acidovorax(91);s__Acidovoraxcaen(87);
ICSZ4EG01BLJPA	k__Bacteria(99);p__Actinobacteria(97);c__Actinobacteria(97);o__Actinomycetales(97);unclassified;unclassified;unclassified;
ICSZ4EG01BK476	k__Bacteria(100);p__Proteobacteria(100);c__Betaproteobacteria(100);o__Burkholderiales(100);unclassified;unclassified;unclassified;
ICSZ4EG01BIH57	k__Bacteria(100);p__Proteobacteria(100);c__Betaproteobacteria(100);o__Burkholderiales(100);f__Comamonadaceae(100);g__Acidovorax(81);unclassified;
ICSZ4EG01BGYYY	k__Bacteria(100);p__Proteobacteria(100);c__Betaproteobacteria(100);o__Burkholderiales(98);unclassified;unclassified;unclassified;
ICSZ4EG01BAXFD	k__Bacteria(100);p__Proteobacteria(100);c__Betaproteobacteria(98);o__Burkholderiales(98);unclassified;unclassified;unclassified;
ICSZ4EG01BAJ3N	k__Bacteria(100);p__Proteobacteria(100);c__Betaproteobacteria(100);o__Burkholderiales(100);f__Comamonadaceae(100);g__Acidovorax(87);unclassified;
ICSZ4EG01B59FK	k__Bacteria(100);p__Proteobacteria(100);c__Betaproteobacteria(100);o__Burkholderiales(100);f__Comamonadaceae(100);unclassified;unclassified;
ICSZ4EG01B1V1P	k__Bacteria(100);p__Proteobacteria(100);c__Alphaproteobacteria(100);o__Rhizobiales(100);f__Bradyrhizobiaceae(100);g__Bradyrhizobium(99);s__Bradyrhizobiumelkani(99);
ICSZ4EG01AVP3M	k__Bacteria(100);p__Proteobacteria(99);c__Betaproteobacteria(99);o__Burkholderiales(99);unclassified;unclassified;unclassified;
ICSZ4EG01AQE62	k__Bacteria(99);unclassified;unclassified;unclassified;unclassified;unclassified;unclassified;
ICSZ4EG01AJM4U	k__Bacteria(100);p__Bacteroidetes(100);c__Flavobacteria(100);o__Flavobacteriales(100);f__Flavobacteriaceae(100);unclassified;unclassified;
ICSZ4EG01AI4V5	k__Bacteria(100);p__Proteobacteria(100);c__Alphaproteobacteria(100);o__Sphingomonadales(100);f__Sphingomonadaceae(100);g__Sphingomonas(100);s__Caulobacterleidyi(100);
ICSZ4EG01AEH8Q	k__Bacteria(100);p__Proteobacteria(100);c__Betaproteobacteria(99);o__Burkholderiales(99);unclassified;unclassified;unclassified;
ICSZ4EG01A9QTF	k__Bacteria(100);p__Proteobacteria(100);c__Betaproteobacteria(100);o__Burkholderiales(100);f__Comamonadaceae(100);g__Diaphorobacter(96);unclassified;
ICSZ4EG01A7XNA	k__Bacteria(100);p__Proteobacteria(100);c__Betaproteobacteria(100);o__Burkholderiales(98);unclassified;unclassified;unclassified;
ICSZ4EG01EWCHI	k__Bacteria(100);unclassified;unclassified;unclassified;unclassified;unclassified;unclassified;
ICSZ4EG01C6A2Y	k__Bacteria(100);p__Proteobacteria(100);c__Alphaproteobacteria(100);o__Sphingomonadales(100);f__Sphingomonadaceae(100);g__Sphingomonas(92);unclassified;
ICSZ4EG01CV6T1	k__Bacteria(100);p__Firmicutes(100);c__Clostridia(100);o__Clostridiales(100);f__Ruminococcaceae(100);g__Oscillospira(100);unclassified;
ICSZ4EG01CTSOM	k__Bacteria(100);p__Proteobacteria(100);c__Alphaproteobacteria(100);o__Sphingomonadales(100);f__Sphingomonadaceae(100);g__Sphingomonas(94);unclassified;
ICSZ4EG01DR1IH	k__Bacteria(100);p__Tenericutes(100);c__Erysipelotrichi(100);o__Erysipelotrichales(100);f__Erysipelotrichaceae(100);g__Allobaculum(100);s__AllobaculumspID(100);
ICSZ4EG01DORDY	k__Bacteria(100);p__Actinobacteria(100);c__Actinobacteria(100);o__Actinomycetales(100);f__Micrococcaceae(100);g__Kocuria(100);s__Kocuriamarin(100);
ICSZ4EG01C5W5W	k__Bacteria(100);p__Actinobacteria(100);c__Actinobacteria(100);o__Actinomycetales(100);f__Propionibacteriaceae(100);g__Propionibacterium(100);s__Propionibacteriumacne(100);
ICSZ4EG01CQL3R	k__Bacteria(100);p__Proteobacteria(100);c__Alphaproteobacteria(100);o__Sphingomonadales(100);f__Sphingomonadaceae(100);g__Sphingomonas(98);s__Caulobacterleidyi(97);
ICSZ4EG01EUX8U	k__Bacteria(100);p__Proteobacteria(100);c__Alphaproteobacteria(100);o__Sphingomonadales(100);f__Sphingomonadaceae(100);g__Sphingomonas(87);unclassified;
ICSZ4EG01CVKFG	k__Bacteria(100);p__Proteobacteria(100);c__Betaproteobacteria(100);o__Rhodocyclales(94);f__Rhodocyclaceae(94);g__Zoogloea(88);unclassified;
ICSZ4EG01BN1WP	k__Bacteria(100);p__Proteobacteria(100);c__Alphaproteobacteria(100);o__Sphingomonadales(100);f__Sphingomonadaceae(100);g__Sphingomonas(100);s__Sphingomonasyabuuchia(98);
ICSZ4EG01B7XZJ	k__Bacteria(100);p__Proteobacteria(100);c__Alphaproteobacteria(100);o__Sphingomonadales(100);f__Sphingomonadaceae(100);g__Sphingomonas(99);s__Caulobacterleidyi(99);
ICSZ4EG01AUE01	k__Bacteria(100);p__Proteobacteria(100);c__Betaproteobacteria(100);o__Rhodocyclales(100);f__Rhodocyclaceae(100);g__Dechloromonas(99);unclassified;
ICSZ4EG01EU9G2	k__Bacteria(100);p__Proteobacteria(100);c__Betaproteobacteria(96);o__Burkholderiales(96);unclassified;unclassified;unclassified;
ICSZ4EG01ENMK4	k__Bacteria(100);p__Proteobacteria(100);c__Alphaproteobacteria(100);o__Sphingomonadales(100);f__Sphingomonadaceae(100);g__Sphingomonas(93);s__Caulobacterleidyi(90);
ICSZ4EG01ELOMW	k__Bacteria(100);p__Proteobacteria(100);c__Betaproteobacteria(100);o__Burkholderiales(100);f__Comamonadaceae(100);g__Acidovorax(91);unclassified;
ICSZ4EG01EJ4WT	k__Bacteria(100);p__Actinobacteria(100);c__Actinobacteria(100);o__Actinomycetales(100);f__Microbacteriaceae(100);unclassified;unclassified;
ICSZ4EG01EHAEM	k__Bacteria(100);p__Proteobacteria(91);c__Gammaproteobacteria(83);unclassified;unclassified;unclassified;unclassified;
ICSZ4EG01EAMTD	k__Bacteria(100);p__Proteobacteria(100);c__Alphaproteobacteria(100);o__Sphingomonadales(100);f__Sphingomonadaceae(100);unclassified;unclassified;
ICSZ4EG01DX96K	k__Bacteria(100);p__Proteobacteria(100);c__Alphaproteobacteria(100);o__Sphingomonadales(100);f__Sphingomonadaceae(100);g__Sphingomonas(97);s__Sphingomonasyabuuchia(97);
ICSZ4EG01DTI0G	k__Bacteria(100);p__Proteobacteria(100);c__Alphaproteobacteria(100);o__Sphingomonadales(100);f__Sphingomonadaceae(100);g__Sphingomonas(97);s__Caulobacterleidyi(87);
ICSZ4EG01DSJA6	k__Bacteria(98);p__Bacteroidetes(84);c__Bacteroidia(80);o__Bacteroidales(80);unclassified;unclassified;unclassified;
ICSZ4EG01DOP3T	k__Bacteria(100);p__Proteobacteria(100);c__Alphaproteobacteria(100);o__Sphingomonadales(100);f__Sphingomonadaceae(100);g__Sphingomonas(99);s__Caulobacterleidyi(99);
ICSZ4EG01DHM3M	k__Bacteria(100);p__Proteobacteria(100);c__Alphaproteobacteria(100);o__Rhizobiales(100);f__Bradyrhizobiaceae(100);g__Bradyrhizobium(91);s__Bradyrhizobiumelkani(89);
ICSZ4EG01DEOBL	k__Bacteria(100);p__Proteobacteria(100);c__Betaproteobacteria(100);o__Burkholderiales(100);f__Comamonadaceae(100);g__Acidovorax(95);unclassified;
ICSZ4EG01DB7YR	k__Bacteria(100);p__Proteobacteria(91);c__Gammaproteobacteria(85);unclassified;unclassified;unclassified;unclassified;
ICSZ4EG02GPS01	k__Bacteria(100);p__Proteobacteria(100);c__Betaproteobacteria(100);o__Burkholderiales(100);f__Comamonadaceae(89);unclassified;unclassified;
ICSZ4EG01D59QR	k__Bacteria(100);p__Proteobacteria(100);c__Alphaproteobacteria(100);o__Sphingomonadales(100);f__Sphingomonadaceae(100);g__Sphingomonas(98);s__Caulobacterleidyi(97);
ICSZ4EG01D50ME	k__Bacteria(100);p__Proteobacteria(97);c__Alphaproteobacteria(96);unclassified;unclassified;unclassified;unclassified;
ICSZ4EG01D4I0Q	k__Bacteria(100);p__Proteobacteria(100);c__Betaproteobacteria(100);o__Burkholderiales(100);f__Comamonadaceae(100);g__Diaphorobacter(97);unclassified;
ICSZ4EG01D283N	k__Bacteria(100);p__Proteobacteria(100);c__Alphaproteobacteria(100);o__Sphingomonadales(100);f__Sphingomonadaceae(100);g__Sphingomonas(98);s__Caulobacterleidyi(98);
ICSZ4EG01D1RV4	k__Bacteria(100);p__Proteobacteria(100);c__Alphaproteobacteria(100);o__Rhizobiales(100);f__Methylobacteriaceae(100);g__Methylobacterium(100);s__Methylobacteriumradiotoleran(86);
ICSZ4EG01CQS95	k__Bacteria(100);p__Proteobacteria(95);c__Alphaproteobacteria(94);unclassified;unclassified;unclassified;unclassified;
ICSZ4EG01CNXHL	k__Bacteria(100);p__Proteobacteria(98);c__Alphaproteobacteria(94);unclassified;unclassified;unclassified;unclassified;
ICSZ4EG01CICDX	k__Bacteria(100);p__Proteobacteria(100);c__Betaproteobacteria(100);o__Burkholderiales(100);f__Comamonadaceae(100);g__Acidovorax(91);unclassified;
ICSZ4EG01CFGYU	k__Bacteria(100);p__Proteobacteria(100);c__Alphaproteobacteria(100);o__Sphingomonadales(99);f__Sphingomonadaceae(99);g__Sphingomonas(99);s__Caulobacterleidyi(99);
ICSZ4EG01CBNFO	k__Bacteria(100);p__Proteobacteria(100);c__Betaproteobacteria(100);unclassified;unclassified;unclassified;unclassified;
ICSZ4EG01CAWRW	k__Bacteria(100);p__Proteobacteria(100);c__Alphaproteobacteria(100);o__Sphingomonadales(100);f__Sphingomonadaceae(100);g__Sphingomonas(98);s__Caulobacterleidyi(98);
ICSZ4EG01CAAJ6	k__Bacteria(100);p__Proteobacteria(99);c__Betaproteobacteria(98);o__Burkholderiales(93);unclassified;unclassified;unclassified;
ICSZ4EG01C9RVL	k__Bacteria(100);p__Proteobacteria(100);c__Alphaproteobacteria(100);o__Sphingomonadales(100);f__Sphingomonadaceae(100);g__Sphingomonas(100);s__Caulobacterleidyi(99);
ICSZ4EG01C9KA0	k__Bacteria(100);p__Proteobacteria(100);c__Betaproteobacteria(100);o__Burkholderiales(97);unclassified;unclassified;unclassified;
ICSZ4EG01C72Q2	k__Bacteria(100);p__Firmicutes(93);c__Clostridia(91);o__Clostridiales(91);f__Lachnospiraceae(90);unclassified;unclassified;
ICSZ4EG01C34Q4	k__Bacteria(100);p__Proteobacteria(100);c__Alphaproteobacteria(100);o__Sphingomonadales(100);f__Sphingomonadaceae(100);g__Sphingomonas(99);s__Caulobacterleidyi(98);
ICSZ4EG01C1P6Z	k__Bacteria(100);p__Proteobacteria(100);c__Alphaproteobacteria(100);o__Sphingomonadales(100);f__Sphingomonadaceae(100);g__Sphingomonas(100);s__Caulobacterleidyi(100);
ICSZ4EG01BUNUJ	k__Bacteria(100);p__Proteobacteria(100);c__Alphaproteobacteria(100);o__Sphingomonadales(100);f__Sphingomonadaceae(100);g__Sphingomonas(99);s__Caulobacterleidyi(99);
ICSZ4EG01BULCQ	k__Bacteria(100);p__Proteobacteria(100);c__Alphaproteobacteria(100);o__Sphingomonadales(100);f__Sphingomonadaceae(100);unclassified;unclassified;
ICSZ4EG01BTCFD	k__Bacteria(100);p__Proteobacteria(100);c__Betaproteobacteria(100);o__Burkholderiales(100);f__Comamonadaceae(100);unclassified;unclassified;
ICSZ4EG01BRPB2	k__Bacteria(100);p__Proteobacteria(99);c__Betaproteobacteria(99);o__Burkholderiales(98);unclassified;unclassified;unclassified;
ICSZ4EG01BQ131	k__Bacteria(100);p__Proteobacteria(100);c__Alphaproteobacteria(100);o__Sphingomonadales(100);f__Sphingomonadaceae(100);g__Sphingomonas(100);s__Caulobacterleidyi(100);
ICSZ4EG01BN9QF	k__Bacteria(100);p__Proteobacteria(99);c__Alphaproteobacteria(99);o__Rhizobiales(99);f__Phyllobacteriaceae(83);unclassified;unclassified;
ICSZ4EG01BMXHN	k__Bacteria(100);p__Proteobacteria(100);c__Alphaproteobacteria(100);o__Sphingomonadales(100);f__Sphingomonadaceae(100);g__Sphingomonas(100);s__Caulobacterleidyi(100);
ICSZ4EG01BLKFA	k__Bacteria(100);p__Proteobacteria(97);c__Alphaproteobacteria(94);unclassified;unclassified;unclassified;unclassified;
ICSZ4EG01BKP9G	k__Bacteria(100);p__Proteobacteria(100);c__Alphaproteobacteria(100);o__Rhizobiales(100);f__Bradyrhizobiaceae(100);g__Bradyrhizobium(95);s__Bradyrhizobiumelkani(95);
ICSZ4EG01BGY55	k__Bacteria(100);p__Proteobacteria(100);c__Alphaproteobacteria(100);o__Sphingomonadales(100);f__Sphingomonadaceae(100);g__Sphingomonas(100);s__Caulobacterleidyi(99);
ICSZ4EG01BEYVX	k__Bacteria(100);p__Proteobacteria(100);c__Alphaproteobacteria(100);o__Sphingomonadales(100);f__Sphingomonadaceae(100);g__Sphingomonas(100);s__Caulobacterleidyi(100);
ICSZ4EG01B5VRS	k__Bacteria(99);p__Proteobacteria(98);c__Betaproteobacteria(95);o__Burkholderiales(94);unclassified;unclassified;unclassified;
ICSZ4EG01B1GV4	k__Bacteria(100);p__Firmicutes(100);c__Clostridia(100);o__Clostridiales(100);f__Veillonellaceae(100);g__Megasphaera(100);s__Megasphaeraelsdeni(100);
ICSZ4EG01AWJQF	k__Bacteria(99);unclassified;unclassified;unclassified;unclassified;unclassified;unclassified;
ICSZ4EG01AQQLB	k__Bacteria(100);p__Proteobacteria(99);c__Betaproteobacteria(97);o__Burkholderiales(97);unclassified;unclassified;unclassified;
ICSZ4EG01AO0ID	k__Bacteria(100);p__Proteobacteria(100);c__Alphaproteobacteria(100);o__Sphingomonadales(100);f__Sphingomonadaceae(100);g__Sphingomonas(100);s__Caulobacterleidyi(99);
ICSZ4EG01AJVMV	k__Bacteria(100);p__Proteobacteria(100);c__Alphaproteobacteria(100);o__Rhizobiales(100);f__Bradyrhizobiaceae(100);g__Bradyrhizobium(88);s__Bradyrhizobiumelkani(85);
ICSZ4EG01AJ9GZ	k__Bacteria(100);p__Proteobacteria(99);c__Betaproteobacteria(96);o__Burkholderiales(93);unclassified;unclassified;unclassified;
ICSZ4EG01AIQVC	k__Bacteria(100);unclassified;unclassified;unclassified;unclassified;unclassified;unclassified;
ICSZ4EG01A6E63	k__Bacteria(100);p__Proteobacteria(100);c__Betaproteobacteria(100);o__Burkholderiales(100);f__Comamonadaceae(100);g__Acidovorax(95);unclassified;
ICSZ4EG01A1TCI	k__Bacteria(100);p__Proteobacteria(100);c__Betaproteobacteria(100);o__Burkholderiales(100);unclassified;unclassified;unclassified;
ICSZ4EG01CNHCN	k__Bacteria(98);unclassified;unclassified;unclassified;unclassified;unclassified;unclassified;
ICSZ4EG01A68AM	k__Bacteria(100);p__Proteobacteria(100);c__Alphaproteobacteria(100);o__Sphingomonadales(100);f__Erythrobacteraceae(99);unclassified;unclassified;
ICSZ4EG01DSFDI	k__Bacteria(98);unclassified;unclassified;unclassified;unclassified;unclassified;unclassified;
ICSZ4EG01ELOYP	k__Bacteria(100);p__Firmicutes(82);c__Clostridia(82);o__Clostridiales(82);f__Ruminococcaceae(81);unclassified;unclassified;
ICSZ4EG01BPV8P	k__Bacteria(100);p__Proteobacteria(100);c__Alphaproteobacteria(100);o__Sphingomonadales(98);f__Sphingomonadaceae(98);g__Sphingopyxis(94);unclassified;
ICSZ4EG01EPU5U	k__Bacteria(100);p__Tenericutes(86);c__Mollicutes(86);o__RF39(80);unclassified;unclassified;unclassified;
ICSZ4EG01ENHQW	k__Bacteria(100);p__Firmicutes(83);c__Clostridia(83);o__Clostridiales(83);f__Ruminococcaceae(83);unclassified;unclassified;
ICSZ4EG01DN3T7	k__Bacteria(99);p__Firmicutes(93);c__Clostridia(90);o__Clostridiales(90);f__Lachnospiraceae(90);g__Clostridium(87);unclassified;
ICSZ4EG01CTUVY	k__Bacteria(100);p__Proteobacteria(100);c__Alphaproteobacteria(100);o__Sphingomonadales(100);f__Sphingomonadaceae(97);g__Sphingomonas(82);s__Sphingomonaswittichi(80);
ICSZ4EG01AKZZA	k__Bacteria(100);p__Firmicutes(100);c__Bacilli(100);o__Lactobacillales(100);f__Streptococcaceae(100);g__Streptococcus(100);unclassified;
ICSZ4EG01ETFFD	k__Bacteria(100);unclassified;unclassified;unclassified;unclassified;unclassified;unclassified;
ICSZ4EG01EGPO2	k__Bacteria(100);unclassified;unclassified;unclassified;unclassified;unclassified;unclassified;
ICSZ4EG01DKP34	k__Bacteria(99);p__Proteobacteria(97);c__Alphaproteobacteria(94);o__Rhodospirillales(94);f__Acetobacteraceae(94);g__Roseococcus(80);unclassified;
ICSZ4EG01C6XVC	k__Bacteria(100);p__Proteobacteria(100);c__Alphaproteobacteria(100);o__Rhizobiales(100);f__Methylobacteriaceae(100);g__Methylobacterium(100);s__Methylobacteriumadhaesivu(100);
ICSZ4EG01C712O	k__Bacteria(100);p__Proteobacteria(100);c__Alphaproteobacteria(100);o__Sphingomonadales(100);f__Sphingomonadaceae(100);unclassified;unclassified;
ICSZ4EG01DRBK7	k__Bacteria(100);p__Proteobacteria(100);c__Betaproteobacteria(100);o__Burkholderiales(100);f__Comamonadaceae(100);g__Variovorax(99);s__Variovoraxparadoxu(99);
ICSZ4EG01C7AP0	k__Bacteria(100);unclassified;unclassified;unclassified;unclassified;unclassified;unclassified;
ICSZ4EG01B12XC	k__Bacteria(100);p__Actinobacteria(100);c__Actinobacteria(100);o__Actinomycetales(100);f__Nocardioidaceae(99);g__Nocardioides(91);unclassified;
ICSZ4EG01BQ8AT	k__Bacteria(98);unclassified;unclassified;unclassified;unclassified;unclassified;unclassified;
ICSZ4EG01AT7TW	k__Bacteria(100);p__Firmicutes(97);c__Clostridia(94);o__Clostridiales(94);f__Lachnospiraceae(94);g__Clostridium(90);unclassified;
ICSZ4EG01EVIHF	k__Bacteria(100);unclassified;unclassified;unclassified;unclassified;unclassified;unclassified;
ICSZ4EG01CN9V6	k__Bacteria(99);unclassified;unclassified;unclassified;unclassified;unclassified;unclassified;
ICSZ4EG01DRHIV	k__Bacteria(100);unclassified;unclassified;unclassified;unclassified;unclassified;unclassified;
ICSZ4EG01DLDCF	k__Bacteria(100);unclassified;unclassified;unclassified;unclassified;unclassified;unclassified;
ICSZ4EG01DI896	k__Bacteria(100);p__Proteobacteria(100);c__Alphaproteobacteria(100);o__Rhizobiales(100);f__Hyphomicrobiaceae(99);g__Pedomicrobium(84);unclassified;
ICSZ4EG01DN6TF	k__Bacteria(100);p__Proteobacteria(100);c__Betaproteobacteria(100);o__Burkholderiales(100);f__Comamonadaceae(100);g__Polaromonas(100);unclassified;
ICSZ4EG01CW375	k__Bacteria(100);p__Firmicutes(98);c__Clostridia(98);o__Clostridiales(98);f__Ruminococcaceae(98);unclassified;unclassified;
ICSZ4EG01A6VUI	k__Bacteria(100);p__Firmicutes(97);c__Clostridia(94);o__Clostridiales(94);f__Lachnospiraceae(94);g__Clostridium(91);unclassified;
ICSZ4EG01EHBP4	k__Bacteria(97);unclassified;unclassified;unclassified;unclassified;unclassified;unclassified;
ICSZ4EG01CQSEC	k__Bacteria(100);p__Firmicutes(100);c__Clostridia(100);o__Clostridiales(100);f__Lachnospiraceae(100);g__Clostridium(90);unclassified;
ICSZ4EG01CBAQ3	k__Bacteria(100);p__Firmicutes(89);c__Clostridia(89);o__Clostridiales(89);f__Lachnospiraceae(87);unclassified;unclassified;
ICSZ4EG01B0GAL	k__Bacteria(100);p__Firmicutes(89);c__Clostridia(89);o__Clostridiales(89);f__Lachnospiraceae(80);unclassified;unclassified;
ICSZ4EG01BPTRE	k__Bacteria(100);unclassified;unclassified;unclassified;unclassified;unclassified;unclassified;
ICSZ4EG01CGH3A	k__Bacteria(100);p__Proteobacteria(100);c__Betaproteobacteria(100);unclassified;unclassified;unclassified;unclassified;
ICSZ4EG01EUAD6	k__Bacteria(97);unclassified;unclassified;unclassified;unclassified;unclassified;unclassified;
ICSZ4EG01EA4SO	k__Bacteria(100);p__Proteobacteria(100);c__Alphaproteobacteria(100);o__Rhizobiales(100);f__Methylobacteriaceae(100);g__Methylobacterium(100);s__Methylobacteriumradiotoleran(97);
ICSZ4EG01DMJ3U	k__Bacteria(100);p__Proteobacteria(100);c__Betaproteobacteria(100);o__Burkholderiales(95);unclassified;unclassified;unclassified;
ICSZ4EG01DKETI	k__Bacteria(96);unclassified;unclassified;unclassified;unclassified;unclassified;unclassified;
ICSZ4EG01D7UAY	k__Bacteria(100);p__Proteobacteria(100);c__Betaproteobacteria(100);o__Burkholderiales(100);f__Comamonadaceae(100);g__Variovorax(100);s__Variovoraxparadoxu(100);
ICSZ4EG01BM06R	k__Bacteria(100);p__Proteobacteria(100);c__Alphaproteobacteria(100);o__Rhizobiales(100);f__Methylobacteriaceae(97);g__Methylobacterium(97);unclassified;
ICSZ4EG01B5VQF	k__Bacteria(100);unclassified;unclassified;unclassified;unclassified;unclassified;unclassified;
ICSZ4EG01BJEZ4	k__Bacteria(100);unclassified;unclassified;unclassified;unclassified;unclassified;unclassified;
ICSZ4EG01D12PP	k__Bacteria(100);p__Acidobacteria(100);c__Chloracidobacteria(100);unclassified;unclassified;unclassified;unclassified;
ICSZ4EG01CY7A0	k__Bacteria(100);p__Actinobacteria(88);c__Actinobacteria(88);o__Actinomycetales(86);unclassified;unclassified;unclassified;
ICSZ4EG01CG59K	k__Bacteria(100);p__Actinobacteria(100);c__Actinobacteria(100);o__Actinomycetales(100);f__Dermacoccaceae(100);g__Dermacoccus(100);unclassified;
ICSZ4EG01BY5WX	k__Bacteria(100);unclassified;unclassified;unclassified;unclassified;unclassified;unclassified;
ICSZ4EG01EHDPF	k__Bacteria(100);p__Acidobacteria(100);c__Chloracidobacteria(100);unclassified;unclassified;unclassified;unclassified;
ICSZ4EG01DZ15F	k__Bacteria(100);p__Proteobacteria(96);c__Alphaproteobacteria(95);o__Sphingomonadales(95);f__Sphingomonadaceae(82);unclassified;unclassified;
ICSZ4EG01BB7C9	k__Bacteria(100);p__Firmicutes(96);c__Clostridia(95);o__Clostridiales(95);f__Ruminococcaceae(95);unclassified;unclassified;
ICSZ4EG01B8206	k__Bacteria(100);p__Proteobacteria(100);c__Alphaproteobacteria(100);o__Rhizobiales(100);f__Methylobacteriaceae(90);g__Methylobacterium(90);unclassified;
ICSZ4EG01ARFXB	k__Bacteria(100);p__Firmicutes(100);c__Clostridia(100);o__Clostridiales(100);f__Lachnospiraceae(100);g__Clostridium(99);unclassified;
ICSZ4EG01A5AC5	k__Bacteria(100);p__Actinobacteria(100);c__Actinobacteria(100);o__Actinomycetales(100);f__Microbacteriaceae(100);g__Frigoribacterium(82);unclassified;
ICSZ4EG01A11FB	k__Bacteria(100);unclassified;unclassified;unclassified;unclassified;unclassified;unclassified;
ICSZ4EG01DEOJ4	k__Bacteria(100);p__Proteobacteria(100);c__Alphaproteobacteria(100);o__Sphingomonadales(100);f__Sphingomonadaceae(100);g__Sphingomonas(99);s__Caulobacterleidyi(99);
ICSZ4EG01D0JCN	k__Bacteria(100);unclassified;unclassified;unclassified;unclassified;unclassified;unclassified;
ICSZ4EG01CR7FD	k__Bacteria(100);p__Firmicutes(100);c__Clostridia(100);o__Clostridiales(100);f__Lachnospiraceae(100);unclassified;unclassified;
ICSZ4EG01CR6IK	k__Bacteria(100);p__Actinobacteria(92);c__Actinobacteria(92);o__Actinomycetales(92);unclassified;unclassified;unclassified;
ICSZ4EG01EYWA2	k__Bacteria(100);p__Proteobacteria(100);c__Alphaproteobacteria(100);o__Sphingomonadales(100);f__Sphingomonadaceae(100);g__Sphingopyxis(92);unclassified;
ICSZ4EG01BXGWA	k__Bacteria(97);unclassified;unclassified;unclassified;unclassified;unclassified;unclassified;
ICSZ4EG01BEURU	k__Bacteria(100);p__Actinobacteria(95);c__Actinobacteria(95);o__Actinomycetales(95);unclassified;unclassified;unclassified;
ICSZ4EG01AYLN4	k__Bacteria(100);p__Proteobacteria(100);c__Alphaproteobacteria(100);o__Sphingomonadales(100);f__Sphingomonadaceae(100);g__Sphingomonas(98);unclassified;
ICSZ4EG01AQ2BA	k__Bacteria(100);unclassified;unclassified;unclassified;unclassified;unclassified;unclassified;
ICSZ4EG01A7XA1	k__Bacteria(98);p__Proteobacteria(91);unclassified;unclassified;unclassified;unclassified;unclassified;
ICSZ4EG01EY7M2	k__Bacteria(100);p__Proteobacteria(100);c__Alphaproteobacteria(100);o__Sphingomonadales(100);f__Sphingomonadaceae(100);g__Sphingomonas(99);s__Caulobacterleidyi(99);
ICSZ4EG01EL966	k__Bacteria(100);p__Proteobacteria(100);c__Alphaproteobacteria(100);o__Sphingomonadales(100);f__Sphingomonadaceae(99);g__Sphingomonas(84);unclassified;
ICSZ4EG01EJBVQ	k__Bacteria(100);p__Actinobacteria(100);c__Actinobacteria(100);o__Actinomycetales(100);f__Corynebacteriaceae(100);g__Corynebacterium(100);s__Corynebacteriumtuberculostearicu(97);
ICSZ4EG01EHXXF	k__Bacteria(100);p__Actinobacteria(100);c__Actinobacteria(100);o__Actinomycetales(100);f__Intrasporangiaceae(98);g__Phycicoccus(97);unclassified;
ICSZ4EG01EE563	k__Bacteria(100);unclassified;unclassified;unclassified;unclassified;unclassified;unclassified;
ICSZ4EG01DTSR0	k__Bacteria(100);p__Firmicutes(99);c__Clostridia(95);o__Clostridiales(95);f__Ruminococcaceae(93);unclassified;unclassified;
ICSZ4EG01DNNPA	k__Bacteria(99);p__Firmicutes(94);c__Clostridia(92);o__Clostridiales(92);f__Lachnospiraceae(85);unclassified;unclassified;
ICSZ4EG01DMDGA	k__Bacteria(100);p__Proteobacteria(100);c__Alphaproteobacteria(100);o__Sphingomonadales(83);f__Sphingomonadaceae(82);unclassified;unclassified;
ICSZ4EG01EMQK0	k__Bacteria(100);unclassified;unclassified;unclassified;unclassified;unclassified;unclassified;
ICSZ4EG01EATCH	k__Bacteria(100);p__Proteobacteria(100);c__Alphaproteobacteria(100);o__Sphingomonadales(100);f__Erythrobacteraceae(91);unclassified;unclassified;
ICSZ4EG01DE6P0	k__Bacteria(100);p__Actinobacteria(100);c__Actinobacteria(100);o__Actinomycetales(100);f__Nocardioidaceae(98);g__Nocardioides(93);unclassified;
ICSZ4EG01DDNUJ	k__Bacteria(100);unclassified;unclassified;unclassified;unclassified;unclassified;unclassified;
ICSZ4EG01CUS06	k__Bacteria(100);p__Proteobacteria(100);c__Betaproteobacteria(99);o__Burkholderiales(99);unclassified;unclassified;unclassified;
ICSZ4EG01DXOCW	k__Bacteria(100);p__Proteobacteria(100);c__Alphaproteobacteria(100);o__Sphingomonadales(100);f__Sphingomonadaceae(100);g__Sphingomonas(95);s__Caulobacterleidyi(95);
ICSZ4EG01CJEML	k__Bacteria(100);p__Proteobacteria(100);c__Alphaproteobacteria(100);o__Rhizobiales(100);f__Methylobacteriaceae(100);g__Methylobacterium(100);s__Methylobacteriumadhaesivu(88);
ICSZ4EG01CBEBL	k__Bacteria(100);p__Firmicutes(80);unclassified;unclassified;unclassified;unclassified;unclassified;
ICSZ4EG01C5XNF	k__Bacteria(100);p__Proteobacteria(100);c__Alphaproteobacteria(100);o__Rhizobiales(100);f__Hyphomicrobiaceae(97);g__Pedomicrobium(87);unclassified;
ICSZ4EG01C40LR	k__Bacteria(100);unclassified;unclassified;unclassified;unclassified;unclassified;unclassified;
ICSZ4EG01C3YT7	k__Bacteria(100);p__Proteobacteria(100);c__Gammaproteobacteria(100);o__Xanthomonadales(100);f__Xanthomonadaceae(100);g__Stenotrophomonas(100);unclassified;
ICSZ4EG01C2E6O	k__Bacteria(100);p__Proteobacteria(100);c__Gammaproteobacteria(100);o__Xanthomonadales(100);f__Xanthomonadaceae(100);g__Lysobacter(84);unclassified;
ICSZ4EG01C1HXL	k__Bacteria(100);unclassified;unclassified;unclassified;unclassified;unclassified;unclassified;
ICSZ4EG01BRN5A	k__Bacteria(100);unclassified;unclassified;unclassified;unclassified;unclassified;unclassified;
ICSZ4EG01BN4HE	k__Bacteria(99);unclassified;unclassified;unclassified;unclassified;unclassified;unclassified;
ICSZ4EG01AH9ZX	k__Bacteria(100);p__Firmicutes(81);unclassified;unclassified;unclassified;unclassified;unclassified;
ICSZ4EG01BHA9I	k__Bacteria(100);p__Tenericutes(86);c__Mollicutes(86);o__RF39(84);unclassified;unclassified;unclassified;
ICSZ4EG01DAFFT	k__Bacteria(100);p__Proteobacteria(100);c__Betaproteobacteria(100);o__Burkholderiales(99);f__Comamonadaceae(98);unclassified;unclassified;
ICSZ4EG01A2Q32	k__Bacteria(100);p__Proteobacteria(100);c__Alphaproteobacteria(100);o__Sphingomonadales(100);unclassified;unclassified;unclassified;
ICSZ4EG01DVNK8	k__Bacteria(100);p__Proteobacteria(100);c__Alphaproteobacteria(100);o__Sphingomonadales(100);f__Sphingomonadaceae(99);g__Sphingomonas(98);s__Caulobacterleidyi(98);
ICSZ4EG01EXNV0	k__Bacteria(100);p__Firmicutes(97);c__Clostridia(97);o__Clostridiales(97);f__Lachnospiraceae(97);g__Clostridium(91);unclassified;
ICSZ4EG01EW8AL	k__Bacteria(100);p__Proteobacteria(100);c__Betaproteobacteria(100);o__Burkholderiales(100);f__Burkholderiaceae(100);g__Ralstonia(99);unclassified;
ICSZ4EG01EVY3A	k__Bacteria(100);p__Actinobacteria(100);c__Actinobacteria(100);o__Actinomycetales(100);f__Nocardioidaceae(100);g__Nocardioides(100);unclassified;
ICSZ4EG01EVV0N	k__Bacteria(100);unclassified;unclassified;unclassified;unclassified;unclassified;unclassified;
ICSZ4EG01EURXO	k__Bacteria(99);p__Firmicutes(90);c__Clostridia(87);o__Clostridiales(85);f__Ruminococcaceae(83);unclassified;unclassified;
ICSZ4EG01ETWDV	k__Bacteria(100);p__Firmicutes(95);c__Bacilli(95);o__Lactobacillales(95);f__Aerococcaceae(93);unclassified;unclassified;
ICSZ4EG01ETRWI	k__Bacteria(100);p__Proteobacteria(100);c__Alphaproteobacteria(100);o__Rhizobiales(100);f__Bradyrhizobiaceae(100);unclassified;unclassified;
ICSZ4EG01ES8HD	k__Bacteria(100);p__Firmicutes(98);c__Clostridia(91);o__Clostridiales(91);f__Ruminococcaceae(87);unclassified;unclassified;
ICSZ4EG01EQWWJ	k__Bacteria(100);unclassified;unclassified;unclassified;unclassified;unclassified;unclassified;
ICSZ4EG01ENVHY	k__Bacteria(97);unclassified;unclassified;unclassified;unclassified;unclassified;unclassified;
ICSZ4EG01EMWDR	k__Bacteria(100);p__Proteobacteria(100);c__Alphaproteobacteria(100);o__Sphingomonadales(89);f__Sphingomonadaceae(84);unclassified;unclassified;
ICSZ4EG01EMLJ0	k__Bacteria(100);p__Firmicutes(100);c__Bacilli(100);o__Bacillales(100);f__Staphylococcaceae(100);g__Staphylococcus(100);s__Staphylococcusepidermidi(98);
ICSZ4EG01EKAWW	k__Bacteria(100);p__Proteobacteria(100);c__Alphaproteobacteria(100);o__Sphingomonadales(100);f__Sphingomonadaceae(100);g__Sphingomonas(100);s__Caulobacterleidyi(100);
ICSZ4EG01EK3JZ	k__Bacteria(93);unclassified;unclassified;unclassified;unclassified;unclassified;unclassified;
ICSZ4EG01EIRM1	k__Bacteria(100);p__Tenericutes(95);c__Mollicutes(95);o__RF39(93);unclassified;unclassified;unclassified;
ICSZ4EG01EH68P	k__Bacteria(100);unclassified;unclassified;unclassified;unclassified;unclassified;unclassified;
ICSZ4EG01EH29F	k__Bacteria(100);unclassified;unclassified;unclassified;unclassified;unclassified;unclassified;
ICSZ4EG01EGBZ0	k__Bacteria(96);unclassified;unclassified;unclassified;unclassified;unclassified;unclassified;
ICSZ4EG01DZADX	k__Bacteria(99);unclassified;unclassified;unclassified;unclassified;unclassified;unclassified;
ICSZ4EG01DZ7HS	k__Bacteria(99);unclassified;unclassified;unclassified;unclassified;unclassified;unclassified;
ICSZ4EG01DYV4D	k__Bacteria(100);unclassified;unclassified;unclassified;unclassified;unclassified;unclassified;
ICSZ4EG01DXNPO	k__Bacteria(100);unclassified;unclassified;unclassified;unclassified;unclassified;unclassified;
ICSZ4EG01DVQ6E	k__Bacteria(100);p__Proteobacteria(100);c__Alphaproteobacteria(100);o__Sphingomonadales(100);f__Sphingomonadaceae(100);g__Sphingomonas(100);s__Caulobacterleidyi(100);
ICSZ4EG01DUMDT	k__Bacteria(100);p__Proteobacteria(100);c__Alphaproteobacteria(100);o__Sphingomonadales(100);f__Sphingomonadaceae(100);g__Sphingomonas(97);s__Caulobacterleidyi(97);
ICSZ4EG01DU6J2	k__Bacteria(100);p__Proteobacteria(100);c__Alphaproteobacteria(100);o__Rhizobiales(100);f__Bradyrhizobiaceae(100);g__Bradyrhizobium(97);s__Bradyrhizobiumelkani(97);
ICSZ4EG01DTY6G	k__Bacteria(99);unclassified;unclassified;unclassified;unclassified;unclassified;unclassified;
ICSZ4EG01DSAIA	k__Bacteria(100);p__Proteobacteria(97);c__Alphaproteobacteria(97);o__Sphingomonadales(97);f__Sphingomonadaceae(92);g__Sphingomonas(85);s__Caulobacterleidyi(83);
ICSZ4EG01DS719	k__Bacteria(100);p__Proteobacteria(100);c__Betaproteobacteria(100);o__Burkholderiales(100);f__Comamonadaceae(100);g__Variovorax(97);s__Variovoraxparadoxu(97);
ICSZ4EG01DRUQ3	k__Bacteria(98);unclassified;unclassified;unclassified;unclassified;unclassified;unclassified;
ICSZ4EG01DOMPH	k__Bacteria(100);unclassified;unclassified;unclassified;unclassified;unclassified;unclassified;
ICSZ4EG01DN0IT	k__Bacteria(100);p__Firmicutes(93);c__Clostridia(88);o__Clostridiales(88);f__Lachnospiraceae(86);unclassified;unclassified;
ICSZ4EG01DKK8N	k__Bacteria(100);p__Proteobacteria(100);c__Alphaproteobacteria(100);o__Sphingomonadales(100);f__Sphingomonadaceae(100);g__Sphingomonas(98);s__Caulobacterleidyi(98);
ICSZ4EG01DKAY7	k__Bacteria(100);p__Proteobacteria(100);c__Alphaproteobacteria(100);o__Sphingomonadales(100);f__Sphingomonadaceae(99);g__Sphingomonas(98);s__Caulobacterleidyi(98);
ICSZ4EG01DJ8OO	k__Bacteria(100);unclassified;unclassified;unclassified;unclassified;unclassified;unclassified;
ICSZ4EG01DJ7I2	k__Bacteria(99);p__Proteobacteria(99);c__Betaproteobacteria(99);o__Burkholderiales(99);unclassified;unclassified;unclassified;
ICSZ4EG01CXYBN	k__Bacteria(100);p__Proteobacteria(100);c__Alphaproteobacteria(100);o__Sphingomonadales(100);f__Sphingomonadaceae(86);unclassified;unclassified;
ICSZ4EG01DEGC8	k__Bacteria(100);p__Proteobacteria(100);c__Alphaproteobacteria(100);o__Sphingomonadales(100);f__Sphingomonadaceae(100);g__Sphingomonas(96);s__Caulobacterleidyi(96);
ICSZ4EG01DDM43	k__Bacteria(100);p__Proteobacteria(100);c__Betaproteobacteria(100);o__Burkholderiales(99);unclassified;unclassified;unclassified;
ICSZ4EG01DAOSA	k__Bacteria(100);p__Tenericutes(85);c__Mollicutes(85);unclassified;unclassified;unclassified;unclassified;
ICSZ4EG01DACIO	k__Bacteria(97);unclassified;unclassified;unclassified;unclassified;unclassified;unclassified;
ICSZ4EG01D9QYA	k__Bacteria(99);unclassified;unclassified;unclassified;unclassified;unclassified;unclassified;
ICSZ4EG01D8BSH	k__Bacteria(100);unclassified;unclassified;unclassified;unclassified;unclassified;unclassified;
ICSZ4EG01D6THP	k__Bacteria(100);unclassified;unclassified;unclassified;unclassified;unclassified;unclassified;
ICSZ4EG01D5B3A	k__Bacteria(100);p__Proteobacteria(100);c__Betaproteobacteria(100);o__Burkholderiales(100);f__Burkholderiaceae(100);g__Ralstonia(100);unclassified;
ICSZ4EG01D48LM	k__Bacteria(100);p__Firmicutes(87);c__Clostridia(80);o__Clostridiales(80);unclassified;unclassified;unclassified;
ICSZ4EG01D41BN	k__Bacteria(99);p__Firmicutes(80);unclassified;unclassified;unclassified;unclassified;unclassified;
ICSZ4EG01D369I	k__Bacteria(100);p__Proteobacteria(100);c__Gammaproteobacteria(100);o__Xanthomonadales(100);f__Xanthomonadaceae(100);g__Stenotrophomonas(99);unclassified;
ICSZ4EG01D26ND	k__Bacteria(100);p__Proteobacteria(100);c__Alphaproteobacteria(100);o__Sphingomonadales(95);unclassified;unclassified;unclassified;
ICSZ4EG01CW6DF	k__Bacteria(100);p__Proteobacteria(100);c__Alphaproteobacteria(100);o__Rhizobiales(100);f__Bradyrhizobiaceae(100);unclassified;unclassified;
ICSZ4EG01CV2SZ	k__Bacteria(100);p__Firmicutes(81);c__Clostridia(81);o__Clostridiales(81);unclassified;unclassified;unclassified;
ICSZ4EG01CUXGM	k__Bacteria(100);p__Proteobacteria(100);c__Alphaproteobacteria(100);o__Sphingomonadales(100);f__Sphingomonadaceae(100);g__Sphingomonas(100);s__Caulobacterleidyi(100);
ICSZ4EG01CSYU5	k__Bacteria(100);p__Firmicutes(100);c__Clostridia(100);o__Clostridiales(100);f__Lachnospiraceae(100);unclassified;unclassified;
ICSZ4EG01CR2MR	k__Bacteria(100);p__Firmicutes(80);c__Clostridia(80);o__Clostridiales(80);unclassified;unclassified;unclassified;
ICSZ4EG01COJPU	k__Bacteria(100);p__Firmicutes(90);c__Clostridia(82);o__Clostridiales(82);f__Lachnospiraceae(81);unclassified;unclassified;
ICSZ4EG01CNT8F	k__Bacteria(99);p__Tenericutes(87);c__Mollicutes(87);o__RF39(81);unclassified;unclassified;unclassified;
ICSZ4EG01CMBRS	k__Bacteria(100);p__Firmicutes(91);c__Clostridia(87);o__Clostridiales(87);f__Lachnospiraceae(86);g__Clostridium(80);unclassified;
ICSZ4EG01CHFKL	k__Bacteria(100);p__Proteobacteria(100);c__Alphaproteobacteria(100);o__Sphingomonadales(100);f__Sphingomonadaceae(100);g__Sphingomonas(99);s__Caulobacterleidyi(98);
ICSZ4EG01CG59D	k__Bacteria(100);unclassified;unclassified;unclassified;unclassified;unclassified;unclassified;
ICSZ4EG01CEU13	k__Bacteria(100);p__Proteobacteria(100);c__Alphaproteobacteria(100);o__Sphingomonadales(100);f__Sphingomonadaceae(100);g__Sphingomonas(99);s__Caulobacterleidyi(99);
ICSZ4EG01CERWH	k__Bacteria(100);p__Proteobacteria(100);c__Alphaproteobacteria(100);unclassified;unclassified;unclassified;unclassified;
ICSZ4EG01CEDHF	k__Bacteria(100);p__Proteobacteria(100);c__Alphaproteobacteria(100);o__Rhizobiales(100);f__Methylobacteriaceae(100);g__Methylobacterium(100);s__Methylobacteriumadhaesivu(100);
ICSZ4EG01CE278	k__Bacteria(100);p__Acidobacteria(100);c__Chloracidobacteria(100);unclassified;unclassified;unclassified;unclassified;
ICSZ4EG01CD1UO	k__Bacteria(100);p__Firmicutes(99);c__Clostridia(98);o__Clostridiales(98);f__Lachnospiraceae(98);unclassified;unclassified;
ICSZ4EG01CCTY4	k__Bacteria(100);p__Proteobacteria(100);c__Betaproteobacteria(100);o__Burkholderiales(100);f__Comamonadaceae(100);g__Variovorax(98);s__Variovoraxparadoxu(98);
ICSZ4EG01CBCY6	k__Bacteria(100);unclassified;unclassified;unclassified;unclassified;unclassified;unclassified;
ICSZ4EG01CA6C0	k__Bacteria(100);p__Proteobacteria(98);c__Alphaproteobacteria(98);o__Rhodobacterales(95);f__Rhodobacteraceae(95);unclassified;unclassified;
ICSZ4EG01C9FIJ	k__Bacteria(100);unclassified;unclassified;unclassified;unclassified;unclassified;unclassified;
ICSZ4EG01C8TLP	k__Bacteria(100);unclassified;unclassified;unclassified;unclassified;unclassified;unclassified;
ICSZ4EG01C6LOD	k__Bacteria(100);p__Proteobacteria(100);c__Alphaproteobacteria(100);o__Rhizobiales(100);f__Methylobacteriaceae(100);g__Methylobacterium(100);s__Methylobacteriumadhaesivu(100);
ICSZ4EG01C60M9	k__Bacteria(100);p__Proteobacteria(100);c__Alphaproteobacteria(100);o__Sphingomonadales(100);f__Sphingomonadaceae(100);unclassified;unclassified;
ICSZ4EG01C5JSV	k__Bacteria(95);unclassified;unclassified;unclassified;unclassified;unclassified;unclassified;
ICSZ4EG01C5GUS	k__Bacteria(100);p__Proteobacteria(100);c__Alphaproteobacteria(100);o__Sphingomonadales(97);f__Sphingomonadaceae(88);unclassified;unclassified;
ICSZ4EG01C5131	k__Bacteria(100);unclassified;unclassified;unclassified;unclassified;unclassified;unclassified;
ICSZ4EG01C4IL9	k__Bacteria(100);p__Proteobacteria(100);c__Alphaproteobacteria(100);o__Sphingomonadales(99);f__Sphingomonadaceae(94);g__Sphingopyxis(86);unclassified;
ICSZ4EG01C4EYB	k__Bacteria(100);p__Proteobacteria(100);c__Alphaproteobacteria(100);o__Sphingomonadales(100);f__Sphingomonadaceae(100);g__Sphingomonas(100);s__Caulobacterleidyi(100);
ICSZ4EG01C14D1	k__Bacteria(100);p__Proteobacteria(100);c__Betaproteobacteria(98);o__Burkholderiales(98);unclassified;unclassified;unclassified;
ICSZ4EG01C1WTI	k__Bacteria(96);unclassified;unclassified;unclassified;unclassified;unclassified;unclassified;
ICSZ4EG01C1W62	k__Bacteria(100);p__Proteobacteria(100);c__Alphaproteobacteria(100);o__Sphingomonadales(100);f__Sphingomonadaceae(100);g__Sphingomonas(100);s__Caulobacterleidyi(100);
ICSZ4EG01BZIKV	k__Bacteria(100);unclassified;unclassified;unclassified;unclassified;unclassified;unclassified;
ICSZ4EG01BVMHB	k__Bacteria(100);p__Proteobacteria(100);c__Betaproteobacteria(100);o__Burkholderiales(100);f__Burkholderiaceae(100);g__Ralstonia(100);unclassified;
ICSZ4EG01BUCNT	k__Bacteria(100);p__Proteobacteria(99);c__Alphaproteobacteria(99);o__Rhizobiales(94);f__Methylobacteriaceae(84);g__Methylobacterium(84);unclassified;
ICSZ4EG01BT1GY	k__Bacteria(100);p__Proteobacteria(100);c__Betaproteobacteria(99);o__Burkholderiales(98);f__Comamonadaceae(95);unclassified;unclassified;
ICSZ4EG01BSMTK	k__Bacteria(100);p__Proteobacteria(100);c__Alphaproteobacteria(100);o__Sphingomonadales(100);f__Erythrobacteraceae(98);unclassified;unclassified;
ICSZ4EG01BRKFA	k__Bacteria(100);p__Proteobacteria(100);c__Alphaproteobacteria(100);o__Rhizobiales(100);unclassified;unclassified;unclassified;
ICSZ4EG01BRJOT	k__Bacteria(100);unclassified;unclassified;unclassified;unclassified;unclassified;unclassified;
ICSZ4EG01BPKOB	k__Bacteria(100);p__Proteobacteria(100);c__Alphaproteobacteria(96);o__Rhodospirillales(96);f__Acetobacteraceae(96);g__Roseococcus(82);unclassified;
ICSZ4EG02IAPM9	k__Bacteria(100);p__Proteobacteria(100);c__Betaproteobacteria(100);o__Burkholderiales(100);f__Comamonadaceae(100);g__Acidovorax(85);unclassified;
ICSZ4EG01BJNZF	k__Bacteria(100);p__Proteobacteria(100);c__Alphaproteobacteria(100);o__Rhizobiales(100);f__Methylobacteriaceae(100);g__Methylobacterium(100);s__Methylobacteriumadhaesivu(99);
ICSZ4EG01BIO21	k__Bacteria(100);p__Proteobacteria(100);c__Alphaproteobacteria(98);o__Sphingomonadales(96);f__Sphingomonadaceae(94);g__Sphingopyxis(91);unclassified;
ICSZ4EG01BHRSX	k__Bacteria(100);p__Proteobacteria(100);c__Alphaproteobacteria(100);o__Sphingomonadales(100);f__Sphingomonadaceae(93);unclassified;unclassified;
ICSZ4EG01BGT3D	k__Bacteria(98);unclassified;unclassified;unclassified;unclassified;unclassified;unclassified;
ICSZ4EG01BEJ3W	k__Bacteria(97);unclassified;unclassified;unclassified;unclassified;unclassified;unclassified;
ICSZ4EG01BEEGO	k__Bacteria(100);p__Proteobacteria(100);c__Alphaproteobacteria(100);o__Sphingomonadales(100);f__Sphingomonadaceae(100);unclassified;unclassified;
ICSZ4EG01BEBIE	k__Bacteria(99);unclassified;unclassified;unclassified;unclassified;unclassified;unclassified;
ICSZ4EG01BCVE7	k__Bacteria(100);unclassified;unclassified;unclassified;unclassified;unclassified;unclassified;
ICSZ4EG01BBBWJ	k__Bacteria(100);p__Proteobacteria(100);c__Alphaproteobacteria(100);o__Rhizobiales(100);f__Methylobacteriaceae(93);g__Methylobacterium(93);unclassified;
ICSZ4EG01BAD89	k__Bacteria(100);p__Proteobacteria(100);c__Alphaproteobacteria(100);o__Sphingomonadales(100);f__Sphingomonadaceae(100);g__Sphingomonas(97);s__Caulobacterleidyi(96);
ICSZ4EG01B9TDF	k__Bacteria(98);unclassified;unclassified;unclassified;unclassified;unclassified;unclassified;
ICSZ4EG01B7XR7	k__Bacteria(100);p__Proteobacteria(99);c__Alphaproteobacteria(92);o__Rhodobacterales(81);f__Rhodobacteraceae(80);unclassified;unclassified;
ICSZ4EG01B7NZ4	k__Bacteria(100);p__Proteobacteria(100);c__Alphaproteobacteria(100);o__Sphingomonadales(100);f__Sphingomonadaceae(100);g__Sphingomonas(99);s__Caulobacterleidyi(99);
ICSZ4EG01B7JQ8	k__Bacteria(100);p__Proteobacteria(100);c__Alphaproteobacteria(100);o__Sphingomonadales(100);f__Sphingomonadaceae(100);g__Sphingomonas(88);s__Caulobacterleidyi(88);
ICSZ4EG01B7B9V	k__Bacteria(100);p__Proteobacteria(100);c__Gammaproteobacteria(96);o__Xanthomonadales(95);f__Xanthomonadaceae(95);unclassified;unclassified;
ICSZ4EG01B5S33	k__Bacteria(100);p__Firmicutes(90);c__Clostridia(87);o__Clostridiales(87);f__Lachnospiraceae(86);unclassified;unclassified;
ICSZ4EG01B3P63	k__Bacteria(98);unclassified;unclassified;unclassified;unclassified;unclassified;unclassified;
ICSZ4EG01B3K4W	k__Bacteria(100);p__Proteobacteria(100);c__Betaproteobacteria(99);o__Burkholderiales(99);f__Comamonadaceae(98);g__Pelomonas(97);unclassified;
ICSZ4EG01B2M5S	k__Bacteria(100);p__Firmicutes(95);c__Clostridia(90);o__Clostridiales(90);f__Lachnospiraceae(90);g__Clostridium(89);unclassified;
ICSZ4EG01B2B6V	k__Bacteria(100);p__Proteobacteria(100);c__Alphaproteobacteria(100);o__Sphingomonadales(100);f__Sphingomonadaceae(100);g__Sphingomonas(100);s__Caulobacterleidyi(100);
ICSZ4EG01B17GN	k__Bacteria(100);p__Actinobacteria(100);c__Actinobacteria(100);o__Actinomycetales(100);f__Nocardioidaceae(99);g__Nocardioides(99);s__Nocardioidesoleivoran(95);
ICSZ4EG01B0GGK	k__Bacteria(100);p__Proteobacteria(100);c__Betaproteobacteria(100);o__Burkholderiales(100);f__Comamonadaceae(100);unclassified;unclassified;
ICSZ4EG01AW5N0	k__Bacteria(100);p__Proteobacteria(100);c__Alphaproteobacteria(100);o__Rhizobiales(100);f__Bradyrhizobiaceae(100);unclassified;unclassified;
ICSZ4EG01AVSZV	k__Bacteria(100);p__Proteobacteria(100);c__Alphaproteobacteria(100);o__Sphingomonadales(100);f__Sphingomonadaceae(100);g__Sphingomonas(100);s__Caulobacterleidyi(100);
ICSZ4EG01ATSQ1	k__Bacteria(100);unclassified;unclassified;unclassified;unclassified;unclassified;unclassified;
ICSZ4EG01AUI7A	k__Bacteria(100);p__Proteobacteria(99);c__Betaproteobacteria(98);o__Burkholderiales(96);unclassified;unclassified;unclassified;
ICSZ4EG01ATY4W	k__Bacteria(100);unclassified;unclassified;unclassified;unclassified;unclassified;unclassified;
ICSZ4EG01ATI2F	k__Bacteria(100);p__Actinobacteria(89);c__Actinobacteria(89);o__Actinomycetales(87);unclassified;unclassified;unclassified;
ICSZ4EG01ATAZU	k__Bacteria(100);p__Firmicutes(96);c__Clostridia(96);o__Clostridiales(96);f__Ruminococcaceae(94);unclassified;unclassified;
ICSZ4EG01ARQLG	k__Bacteria(100);p__Proteobacteria(100);c__Alphaproteobacteria(100);o__Sphingomonadales(97);f__Sphingomonadaceae(88);unclassified;unclassified;
ICSZ4EG01APN4P	k__Bacteria(99);unclassified;unclassified;unclassified;unclassified;unclassified;unclassified;
ICSZ4EG01AOHNX	k__Bacteria(100);unclassified;unclassified;unclassified;unclassified;unclassified;unclassified;
ICSZ4EG02IS163	k__Bacteria(100);p__Proteobacteria(100);c__Betaproteobacteria(94);o__Burkholderiales(93);unclassified;unclassified;unclassified;
ICSZ4EG01AK5CH	k__Bacteria(100);p__Firmicutes(93);c__Clostridia(91);o__Clostridiales(91);f__Lachnospiraceae(91);g__Clostridium(87);unclassified;
ICSZ4EG01AJCUQ	k__Bacteria(92);unclassified;unclassified;unclassified;unclassified;unclassified;unclassified;
ICSZ4EG01AJ9XS	k__Bacteria(100);p__Proteobacteria(100);c__Alphaproteobacteria(100);o__Sphingomonadales(100);f__Sphingomonadaceae(100);g__Sphingomonas(96);s__Sphingomonasasaccharolytic(89);
ICSZ4EG01AIWMD	k__Bacteria(100);p__Bacteroidetes(97);c__Sphingobacteria(97);o__Sphingobacteriales(97);f__Flexibacteraceae(96);g__Spirosoma(96);unclassified;
ICSZ4EG01AIA9B	k__Bacteria(100);p__Firmicutes(83);unclassified;unclassified;unclassified;unclassified;unclassified;
ICSZ4EG01A9RSA	k__Bacteria(100);p__Proteobacteria(100);c__Alphaproteobacteria(100);o__Sphingomonadales(100);f__Sphingomonadaceae(99);g__Sphingomonas(99);s__Caulobacterleidyi(98);
ICSZ4EG01A6IDQ	k__Bacteria(100);unclassified;unclassified;unclassified;unclassified;unclassified;unclassified;
ICSZ4EG01A5QK0	k__Bacteria(100);p__Firmicutes(85);c__Clostridia(85);o__Clostridiales(85);f__Ruminococcaceae(82);unclassified;unclassified;
ICSZ4EG01A5ITW	k__Bacteria(100);p__Actinobacteria(100);c__Actinobacteria(100);o__Actinomycetales(100);f__Nocardioidaceae(98);g__Nocardioides(98);s__Nocardioidesoleivoran(95);
ICSZ4EG01A59FC	k__Bacteria(100);p__Proteobacteria(99);c__Betaproteobacteria(99);o__Burkholderiales(96);unclassified;unclassified;unclassified;
ICSZ4EG01A473J	k__Bacteria(100);p__Proteobacteria(100);c__Alphaproteobacteria(100);o__Sphingomonadales(100);f__Sphingomonadaceae(100);g__Sphingomonas(97);s__Caulobacterleidyi(97);
ICSZ4EG01A3QX3	k__Bacteria(100);unclassified;unclassified;unclassified;unclassified;unclassified;unclassified;
ICSZ4EG01A38JJ	k__Bacteria(100);unclassified;unclassified;unclassified;unclassified;unclassified;unclassified;
ICSZ4EG01DBP0T	k__Bacteria(100);p__Bacteroidetes(100);c__Sphingobacteria(97);o__Sphingobacteriales(97);f__Flexibacteraceae(94);g__Adhaeribacter(90);unclassified;
ICSZ4EG01EFKYN	k__Bacteria(100);p__Proteobacteria(100);c__Betaproteobacteria(100);o__Burkholderiales(100);f__Comamonadaceae(100);g__Acidovorax(90);unclassified;
ICSZ4EG01CCJGJ	k__Bacteria(100);p__Proteobacteria(100);c__Betaproteobacteria(100);o__Rhodocyclales(100);f__Rhodocyclaceae(100);g__Zoogloea(100);s__Zoogloearamiger(100);
ICSZ4EG01DJ7AE	k__Bacteria(100);p__Proteobacteria(100);c__Betaproteobacteria(100);o__Burkholderiales(100);f__Comamonadaceae(100);unclassified;unclassified;
ICSZ4EG01CC2OA	k__Bacteria(100);p__Proteobacteria(100);c__Betaproteobacteria(100);o__Burkholderiales(100);f__Comamonadaceae(100);unclassified;unclassified;
ICSZ4EG01CABBJ	k__Bacteria(100);p__Proteobacteria(100);c__Alphaproteobacteria(100);o__Sphingomonadales(100);f__Sphingomonadaceae(100);unclassified;unclassified;
ICSZ4EG01EW1IX	k__Bacteria(100);p__Proteobacteria(100);c__Alphaproteobacteria(100);o__Sphingomonadales(100);f__Sphingomonadaceae(100);g__Sphingomonas(100);s__Caulobacterleidyi(100);
ICSZ4EG01EV3OF	k__Bacteria(100);p__Proteobacteria(100);c__Alphaproteobacteria(100);o__Sphingomonadales(100);f__Sphingomonadaceae(100);g__Sphingomonas(100);s__Caulobacterleidyi(100);
ICSZ4EG01ET748	k__Bacteria(100);p__Proteobacteria(100);c__Alphaproteobacteria(100);o__Sphingomonadales(100);f__Sphingomonadaceae(100);g__Sphingomonas(99);s__Caulobacterleidyi(98);
ICSZ4EG01ES8NH	k__Bacteria(100);p__Proteobacteria(100);c__Alphaproteobacteria(100);o__Sphingomonadales(100);f__Sphingomonadaceae(100);g__Sphingomonas(97);s__Caulobacterleidyi(96);
ICSZ4EG01ELS1E	k__Bacteria(100);p__Proteobacteria(99);c__Betaproteobacteria(97);o__Burkholderiales(90);unclassified;unclassified;unclassified;
ICSZ4EG01EJVDK	k__Bacteria(100);p__Proteobacteria(100);c__Betaproteobacteria(100);o__Burkholderiales(100);f__Comamonadaceae(100);g__Acidovorax(92);unclassified;
ICSZ4EG01EGI9V	k__Bacteria(100);p__Proteobacteria(100);c__Betaproteobacteria(99);o__Burkholderiales(95);unclassified;unclassified;unclassified;
ICSZ4EG01C3M6V	k__Bacteria(99);p__Proteobacteria(99);c__Betaproteobacteria(99);o__Burkholderiales(99);f__Comamonadaceae(97);g__Acidovorax(80);unclassified;
ICSZ4EG01DT6CE	k__Bacteria(100);p__Proteobacteria(100);c__Betaproteobacteria(100);o__Burkholderiales(100);f__Comamonadaceae(100);g__Acidovorax(94);unclassified;
ICSZ4EG01DRFKE	k__Bacteria(100);p__Proteobacteria(100);c__Alphaproteobacteria(100);o__Sphingomonadales(100);f__Sphingomonadaceae(98);g__Sphingomonas(97);s__Caulobacterleidyi(97);
ICSZ4EG01DQE5F	k__Bacteria(100);p__Proteobacteria(97);c__Betaproteobacteria(97);o__Burkholderiales(97);unclassified;unclassified;unclassified;
ICSZ4EG02G2B0F	k__Bacteria(100);p__Proteobacteria(100);c__Betaproteobacteria(100);o__Burkholderiales(100);f__Comamonadaceae(99);g__Acidovorax(83);unclassified;
ICSZ4EG01DNJLQ	k__Bacteria(100);p__Proteobacteria(100);c__Betaproteobacteria(100);o__Burkholderiales(100);f__Comamonadaceae(100);g__Acidovorax(94);unclassified;
ICSZ4EG01DKNVF	k__Bacteria(100);p__Proteobacteria(100);c__Alphaproteobacteria(100);o__Sphingomonadales(100);f__Sphingomonadaceae(100);g__Sphingomonas(97);s__Caulobacterleidyi(97);
ICSZ4EG01DKCR7	k__Bacteria(100);p__Proteobacteria(100);c__Alphaproteobacteria(100);o__Sphingomonadales(100);f__Sphingomonadaceae(100);g__Sphingomonas(99);s__Caulobacterleidyi(99);
ICSZ4EG02HENIH	k__Bacteria(100);p__Proteobacteria(100);c__Betaproteobacteria(100);o__Burkholderiales(99);f__Comamonadaceae(89);unclassified;unclassified;
ICSZ4EG01DF0U7	k__Bacteria(100);p__Proteobacteria(100);c__Betaproteobacteria(100);o__Burkholderiales(100);f__Comamonadaceae(100);g__Acidovorax(100);s__Acidovoraxcaen(97);
ICSZ4EG01DEI6S	k__Bacteria(100);p__Proteobacteria(100);c__Betaproteobacteria(100);o__Burkholderiales(99);unclassified;unclassified;unclassified;
ICSZ4EG01DA7N6	k__Bacteria(100);p__Proteobacteria(100);c__Alphaproteobacteria(100);o__Sphingomonadales(100);f__Sphingomonadaceae(100);g__Sphingomonas(100);s__Caulobacterleidyi(100);
ICSZ4EG01D6N2F	k__Bacteria(100);p__Proteobacteria(100);c__Betaproteobacteria(100);o__Burkholderiales(100);f__Comamonadaceae(100);g__Acidovorax(96);unclassified;
ICSZ4EG01D67ZR	k__Bacteria(100);p__Proteobacteria(100);c__Alphaproteobacteria(100);o__Sphingomonadales(100);f__Sphingomonadaceae(100);g__Sphingomonas(99);s__Caulobacterleidyi(99);
ICSZ4EG01D5PFP	k__Bacteria(100);p__Proteobacteria(100);c__Alphaproteobacteria(100);o__Sphingomonadales(100);f__Sphingomonadaceae(100);g__Sphingomonas(99);s__Caulobacterleidyi(99);
ICSZ4EG01D3CXM	k__Bacteria(100);p__Bacteroidetes(96);c__Sphingobacteria(87);o__Sphingobacteriales(87);unclassified;unclassified;unclassified;
ICSZ4EG01CWDGQ	k__Bacteria(100);p__Proteobacteria(100);c__Alphaproteobacteria(100);o__Sphingomonadales(100);f__Sphingomonadaceae(100);g__Sphingomonas(100);s__Caulobacterleidyi(99);
ICSZ4EG01CUK82	k__Bacteria(100);p__Proteobacteria(100);c__Betaproteobacteria(100);o__Burkholderiales(98);unclassified;unclassified;unclassified;
ICSZ4EG01CRR9M	k__Bacteria(100);p__Proteobacteria(100);c__Betaproteobacteria(98);o__Burkholderiales(96);unclassified;unclassified;unclassified;
ICSZ4EG01CQ676	k__Bacteria(100);p__Bacteroidetes(100);c__Flavobacteria(100);o__Flavobacteriales(100);f__Flavobacteriaceae(100);unclassified;unclassified;
ICSZ4EG01CL7DR	k__Bacteria(100);p__Proteobacteria(100);c__Alphaproteobacteria(100);o__Sphingomonadales(100);f__Sphingomonadaceae(100);g__Sphingomonas(95);s__Caulobacterleidyi(95);
ICSZ4EG01CKKIN	k__Bacteria(81);unclassified;unclassified;unclassified;unclassified;unclassified;unclassified;
ICSZ4EG01CKGMH	k__Bacteria(100);p__Proteobacteria(98);c__Betaproteobacteria(96);o__Burkholderiales(96);unclassified;unclassified;unclassified;
ICSZ4EG01CIZZZ	k__Bacteria(100);p__Proteobacteria(100);c__Betaproteobacteria(100);o__Burkholderiales(100);f__Comamonadaceae(100);g__Acidovorax(94);unclassified;
ICSZ4EG01CHDCH	k__Bacteria(100);p__Proteobacteria(100);c__Alphaproteobacteria(100);o__Sphingomonadales(100);f__Sphingomonadaceae(100);g__Sphingomonas(100);s__Caulobacterleidyi(100);
ICSZ4EG01CGU2Y	k__Bacteria(100);p__Proteobacteria(100);c__Alphaproteobacteria(100);o__Sphingomonadales(100);f__Sphingomonadaceae(100);g__Sphingomonas(100);s__Caulobacterleidyi(100);
ICSZ4EG01CGMEJ	k__Bacteria(100);p__Actinobacteria(100);c__Actinobacteria(100);o__Actinomycetales(100);f__Corynebacteriaceae(100);g__Corynebacterium(100);unclassified;
ICSZ4EG01CF7KN	k__Bacteria(100);p__Proteobacteria(100);c__Betaproteobacteria(100);o__Burkholderiales(100);f__Comamonadaceae(100);unclassified;unclassified;
ICSZ4EG01CEZW0	k__Bacteria(100);p__Proteobacteria(100);c__Alphaproteobacteria(100);o__Rhizobiales(100);f__Bradyrhizobiaceae(100);unclassified;unclassified;
ICSZ4EG01C9HAO	k__Bacteria(100);p__Proteobacteria(99);c__Betaproteobacteria(97);o__Burkholderiales(93);unclassified;unclassified;unclassified;
ICSZ4EG01C7BRV	k__Bacteria(100);p__Proteobacteria(100);c__Betaproteobacteria(100);o__Burkholderiales(100);f__Comamonadaceae(100);unclassified;unclassified;
ICSZ4EG02HNCBT	k__Bacteria(100);p__Proteobacteria(100);c__Betaproteobacteria(100);o__Rhodocyclales(91);f__Rhodocyclaceae(91);g__Zoogloea(90);s__Zoogloearamiger(89);
ICSZ4EG01C0EZZ	k__Bacteria(100);p__Proteobacteria(100);c__Betaproteobacteria(100);o__Burkholderiales(100);f__Comamonadaceae(100);g__Diaphorobacter(98);unclassified;
ICSZ4EG01BZYOJ	k__Bacteria(100);p__Proteobacteria(100);c__Alphaproteobacteria(100);o__Sphingomonadales(100);f__Sphingomonadaceae(100);g__Sphingomonas(84);s__Caulobacterleidyi(84);
ICSZ4EG01BZ1ES	k__Bacteria(100);p__Proteobacteria(99);c__Betaproteobacteria(99);o__Burkholderiales(95);unclassified;unclassified;unclassified;
ICSZ4EG02H0PFN	k__Bacteria(100);p__Proteobacteria(100);c__Betaproteobacteria(100);o__Burkholderiales(100);f__Comamonadaceae(100);g__Acidovorax(98);s__Acidovoraxcaen(96);
ICSZ4EG01BTEZK	k__Bacteria(100);p__Proteobacteria(98);c__Alphaproteobacteria(98);o__Sphingomonadales(98);f__Sphingomonadaceae(98);g__Sphingomonas(94);s__Caulobacterleidyi(94);
ICSZ4EG01BMKB7	k__Bacteria(100);p__Proteobacteria(100);c__Betaproteobacteria(99);o__Burkholderiales(98);unclassified;unclassified;unclassified;
ICSZ4EG01BHFK7	k__Bacteria(100);p__Proteobacteria(99);c__Betaproteobacteria(98);o__Burkholderiales(98);unclassified;unclassified;unclassified;
ICSZ4EG01BFO1N	k__Bacteria(100);p__Proteobacteria(100);c__Alphaproteobacteria(100);o__Sphingomonadales(100);f__Sphingomonadaceae(100);unclassified;unclassified;
ICSZ4EG01BESI3	k__Bacteria(100);p__Proteobacteria(100);c__Betaproteobacteria(100);o__Burkholderiales(100);f__Comamonadaceae(99);unclassified;unclassified;
ICSZ4EG01BEDND	k__Bacteria(100);p__Proteobacteria(100);c__Alphaproteobacteria(100);o__Sphingomonadales(100);f__Sphingomonadaceae(96);g__Sphingomonas(94);s__Caulobacterleidyi(93);
ICSZ4EG01B9KI8	k__Bacteria(100);p__Proteobacteria(100);c__Alphaproteobacteria(100);o__Sphingomonadales(100);f__Sphingomonadaceae(100);g__Sphingomonas(100);s__Caulobacterleidyi(100);
ICSZ4EG01B8ENL	k__Bacteria(100);p__Proteobacteria(100);c__Alphaproteobacteria(100);o__Sphingomonadales(100);f__Sphingomonadaceae(100);g__Sphingomonas(97);s__Caulobacterleidyi(97);
ICSZ4EG01B7KHP	k__Bacteria(100);p__Proteobacteria(100);c__Betaproteobacteria(100);o__Burkholderiales(100);f__Comamonadaceae(100);unclassified;unclassified;
ICSZ4EG01B7H2D	k__Bacteria(100);p__Proteobacteria(100);c__Betaproteobacteria(100);o__Burkholderiales(100);f__Comamonadaceae(100);g__Acidovorax(88);unclassified;
ICSZ4EG01B4ZOW	k__Bacteria(100);p__Proteobacteria(100);c__Betaproteobacteria(100);o__Burkholderiales(100);f__Comamonadaceae(100);g__Acidovorax(87);unclassified;
ICSZ4EG01B2XFM	k__Bacteria(100);p__Bacteroidetes(100);c__Sphingobacteria(97);o__Sphingobacteriales(97);unclassified;unclassified;unclassified;
ICSZ4EG01AXIVQ	k__Bacteria(100);p__Proteobacteria(100);c__Alphaproteobacteria(99);o__Sphingomonadales(99);f__Sphingomonadaceae(98);g__Sphingomonas(95);s__Caulobacterleidyi(94);
ICSZ4EG01AVHCT	k__Bacteria(100);p__Proteobacteria(100);c__Alphaproteobacteria(100);o__Sphingomonadales(100);f__Sphingomonadaceae(100);g__Sphingomonas(100);s__Caulobacterleidyi(100);
ICSZ4EG01AUUXL	k__Bacteria(100);p__Proteobacteria(98);c__Betaproteobacteria(97);o__Burkholderiales(96);unclassified;unclassified;unclassified;
ICSZ4EG01AUP12	k__Bacteria(100);p__Proteobacteria(100);c__Betaproteobacteria(97);o__Burkholderiales(94);unclassified;unclassified;unclassified;
ICSZ4EG01ASMBY	k__Bacteria(100);p__Proteobacteria(100);c__Gammaproteobacteria(100);o__Pseudomonadales(100);f__Moraxellaceae(100);g__Acinetobacter(100);unclassified;
ICSZ4EG01ARS8U	k__Bacteria(100);p__Proteobacteria(100);c__Betaproteobacteria(100);o__Burkholderiales(97);unclassified;unclassified;unclassified;
ICSZ4EG01AQAM7	k__Bacteria(100);p__Proteobacteria(99);c__Betaproteobacteria(99);o__Burkholderiales(98);unclassified;unclassified;unclassified;
ICSZ4EG01AP84S	k__Bacteria(100);p__Proteobacteria(100);c__Alphaproteobacteria(100);o__Sphingomonadales(100);f__Sphingomonadaceae(100);g__Sphingomonas(98);s__Caulobacterleidyi(98);
ICSZ4EG01AHGZU	k__Bacteria(100);p__Proteobacteria(100);c__Alphaproteobacteria(100);o__Sphingomonadales(100);f__Sphingomonadaceae(100);g__Sphingomonas(100);s__Caulobacterleidyi(100);
ICSZ4EG01AFQYT	k__Bacteria(100);p__Proteobacteria(100);c__Betaproteobacteria(100);o__Burkholderiales(100);f__Comamonadaceae(100);g__Acidovorax(92);unclassified;
ICSZ4EG01A9TXF	k__Bacteria(100);p__Bacteroidetes(98);c__Sphingobacteria(96);o__Sphingobacteriales(96);f__Flexibacteraceae(82);unclassified;unclassified;
ICSZ4EG01A91BE	k__Bacteria(99);p__Proteobacteria(99);c__Betaproteobacteria(97);o__Burkholderiales(96);f__Comamonadaceae(81);unclassified;unclassified;
ICSZ4EG01A57LW	k__Bacteria(100);p__Proteobacteria(100);c__Alphaproteobacteria(99);o__Sphingomonadales(99);f__Sphingomonadaceae(99);g__Sphingomonas(99);s__Caulobacterleidyi(97);
ICSZ4EG01A2AI2	k__Bacteria(100);p__Proteobacteria(100);c__Alphaproteobacteria(100);o__Rhizobiales(100);f__Bradyrhizobiaceae(100);g__Afipia(85);unclassified;
ICSZ4EG01A1HS9	k__Bacteria(100);p__Proteobacteria(100);c__Betaproteobacteria(100);o__Burkholderiales(100);unclassified;unclassified;unclassified;
ICSZ4EG01EH7R7	k__Bacteria(100);unclassified;unclassified;unclassified;unclassified;unclassified;unclassified;
ICSZ4EG01ECNVS	k__Bacteria(100);p__Bacteroidetes(100);c__Sphingobacteria(100);o__Sphingobacteriales(100);f__Flexibacteraceae(100);g__Hymenobacter(100);unclassified;
ICSZ4EG01EAR51	k__Bacteria(100);p__Bacteroidetes(100);c__Flavobacteria(100);o__Flavobacteriales(100);f__Flavobacteriaceae(100);g__Chryseobacterium(92);unclassified;
ICSZ4EG01CNJ8T	k__Bacteria(100);p__Proteobacteria(100);c__Betaproteobacteria(96);o__Burkholderiales(95);unclassified;unclassified;unclassified;
ICSZ4EG01CEZ0W	k__Bacteria(100);p__Proteobacteria(98);c__Alphaproteobacteria(98);o__Sphingomonadales(98);f__Sphingomonadaceae(98);g__Sphingomonas(94);s__Caulobacterleidyi(94);
ICSZ4EG01BKLDB	k__Bacteria(100);p__Proteobacteria(100);c__Alphaproteobacteria(100);o__Sphingomonadales(100);f__Sphingomonadaceae(100);g__Sphingomonas(100);s__Caulobacterleidyi(100);
ICSZ4EG01BEJBY	k__Bacteria(100);p__Bacteroidetes(100);c__Flavobacteria(100);o__Flavobacteriales(100);f__Flavobacteriaceae(100);unclassified;unclassified;
ICSZ4EG01ESAUR	k__Bacteria(100);p__Proteobacteria(100);c__Betaproteobacteria(100);o__Burkholderiales(100);f__Burkholderiaceae(96);g__Ralstonia(95);unclassified;
ICSZ4EG01AP04F	k__Bacteria(100);unclassified;unclassified;unclassified;unclassified;unclassified;unclassified;
ICSZ4EG01EWFPU	k__Bacteria(100);p__Firmicutes(91);c__Clostridia(89);o__Clostridiales(88);f__Lachnospiraceae(88);unclassified;unclassified;
ICSZ4EG01ET3EZ	k__Bacteria(100);p__Proteobacteria(100);c__Alphaproteobacteria(100);o__Sphingomonadales(100);f__Sphingomonadaceae(100);g__Sphingomonas(92);s__Caulobacterleidyi(86);
ICSZ4EG01EO7PO	k__Bacteria(100);p__Proteobacteria(100);c__Alphaproteobacteria(100);o__Sphingomonadales(100);f__Sphingomonadaceae(100);g__Sphingomonas(94);s__Caulobacterleidyi(94);
ICSZ4EG01EO750	k__Bacteria(100);p__Proteobacteria(100);c__Alphaproteobacteria(100);o__Sphingomonadales(100);f__Sphingomonadaceae(100);g__Sphingomonas(98);s__Caulobacterleidyi(98);
ICSZ4EG01ENROS	k__Bacteria(100);p__Proteobacteria(100);c__Betaproteobacteria(100);o__Burkholderiales(95);unclassified;unclassified;unclassified;
ICSZ4EG01EN3FU	k__Bacteria(100);p__Proteobacteria(100);c__Alphaproteobacteria(100);o__Sphingomonadales(100);f__Sphingomonadaceae(100);g__Sphingomonas(100);s__Caulobacterleidyi(100);
ICSZ4EG01EH9K2	k__Bacteria(100);p__Bacteroidetes(100);c__Sphingobacteria(99);o__Sphingobacteriales(99);f__Flexibacteraceae(99);g__Spirosoma(99);unclassified;
ICSZ4EG01EGJHY	k__Bacteria(100);p__Proteobacteria(100);c__Betaproteobacteria(100);o__Burkholderiales(100);f__Comamonadaceae(100);g__Acidovorax(87);unclassified;
ICSZ4EG01EFQCS	k__Bacteria(100);p__Proteobacteria(100);c__Betaproteobacteria(100);o__Burkholderiales(100);f__Burkholderiaceae(100);g__Ralstonia(100);unclassified;
ICSZ4EG01BYMEQ	k__Bacteria(100);p__Proteobacteria(100);c__Betaproteobacteria(100);o__Burkholderiales(100);f__Burkholderiaceae(93);g__Ralstonia(89);unclassified;
ICSZ4EG01EAJTT	k__Bacteria(100);p__Proteobacteria(100);c__Alphaproteobacteria(100);o__Sphingomonadales(100);f__Sphingomonadaceae(100);g__Sphingomonas(100);s__Caulobacterleidyi(100);
ICSZ4EG01DZV3I	k__Bacteria(98);unclassified;unclassified;unclassified;unclassified;unclassified;unclassified;
ICSZ4EG01DXBTT	k__Bacteria(100);p__Proteobacteria(100);c__Betaproteobacteria(97);o__Burkholderiales(94);unclassified;unclassified;unclassified;
ICSZ4EG01DUOXK	k__Bacteria(100);p__Actinobacteria(94);c__Actinobacteria(94);o__Actinomycetales(94);unclassified;unclassified;unclassified;
ICSZ4EG01DUAT0	k__Bacteria(100);unclassified;unclassified;unclassified;unclassified;unclassified;unclassified;
ICSZ4EG01DS98I	k__Bacteria(100);p__Proteobacteria(100);c__Alphaproteobacteria(100);o__Sphingomonadales(100);f__Sphingomonadaceae(100);g__Sphingomonas(99);s__Caulobacterleidyi(99);
ICSZ4EG01DQV78	k__Bacteria(100);p__Proteobacteria(100);c__Alphaproteobacteria(100);o__Sphingomonadales(100);f__Sphingomonadaceae(100);g__Sphingomonas(97);s__Caulobacterleidyi(97);
ICSZ4EG01DQ37W	k__Bacteria(100);p__Proteobacteria(100);c__Alphaproteobacteria(100);o__Sphingomonadales(100);f__Sphingomonadaceae(100);g__Sphingomonas(100);s__Caulobacterleidyi(100);
ICSZ4EG02IT7J7	k__Bacteria(100);p__Proteobacteria(100);c__Betaproteobacteria(100);o__Burkholderiales(97);unclassified;unclassified;unclassified;
ICSZ4EG01DKXFB	k__Bacteria(100);p__Proteobacteria(100);c__Betaproteobacteria(99);o__Burkholderiales(98);unclassified;unclassified;unclassified;
ICSZ4EG01DM4GK	k__Bacteria(100);p__Proteobacteria(100);c__Alphaproteobacteria(100);o__Sphingomonadales(100);f__Sphingomonadaceae(100);g__Sphingomonas(100);s__Caulobacterleidyi(100);
ICSZ4EG01DHYJR	k__Bacteria(99);unclassified;unclassified;unclassified;unclassified;unclassified;unclassified;
ICSZ4EG01DHYFM	k__Bacteria(100);unclassified;unclassified;unclassified;unclassified;unclassified;unclassified;
ICSZ4EG01DCI8W	k__Bacteria(100);p__Proteobacteria(100);c__Betaproteobacteria(100);o__Burkholderiales(100);f__Burkholderiaceae(100);g__Ralstonia(99);unclassified;
ICSZ4EG01D9RBF	k__Bacteria(100);p__Bacteroidetes(89);c__Sphingobacteria(89);o__Sphingobacteriales(89);f__Flexibacteraceae(89);g__Hymenobacter(88);unclassified;
ICSZ4EG01D86OE	k__Bacteria(100);p__Proteobacteria(100);c__Betaproteobacteria(100);o__Burkholderiales(100);f__Burkholderiaceae(100);g__Ralstonia(94);unclassified;
ICSZ4EG01D6WHB	k__Bacteria(100);p__Firmicutes(100);c__Bacilli(100);o__Lactobacillales(100);f__Streptococcaceae(100);g__Streptococcus(100);s__Streptococcusgordoni(100);
ICSZ4EG01D6N6R	k__Bacteria(100);p__Actinobacteria(96);c__Actinobacteria(96);o__Actinomycetales(96);unclassified;unclassified;unclassified;
ICSZ4EG01D6KJU	k__Bacteria(100);p__Proteobacteria(100);c__Alphaproteobacteria(100);o__Sphingomonadales(100);f__Sphingomonadaceae(99);g__Sphingomonas(95);s__Caulobacterleidyi(95);
ICSZ4EG01CW5HQ	k__Bacteria(100);p__Proteobacteria(100);c__Alphaproteobacteria(100);o__Sphingomonadales(100);f__Sphingomonadaceae(100);g__Sphingomonas(97);s__Caulobacterleidyi(97);
ICSZ4EG01CVL7I	k__Bacteria(100);p__Proteobacteria(98);c__Betaproteobacteria(98);o__Burkholderiales(94);unclassified;unclassified;unclassified;
ICSZ4EG01CUR67	k__Bacteria(100);p__Proteobacteria(100);c__Alphaproteobacteria(100);o__Sphingomonadales(100);f__Sphingomonadaceae(100);g__Sphingomonas(100);s__Caulobacterleidyi(100);
ICSZ4EG01CQ78T	k__Bacteria(100);p__Proteobacteria(99);c__Betaproteobacteria(98);o__Burkholderiales(95);unclassified;unclassified;unclassified;
ICSZ4EG01CN9MJ	k__Bacteria(100);p__Proteobacteria(100);c__Betaproteobacteria(100);o__Burkholderiales(100);f__Burkholderiaceae(100);g__Ralstonia(100);unclassified;
ICSZ4EG01CJA8H	k__Bacteria(100);unclassified;unclassified;unclassified;unclassified;unclassified;unclassified;
ICSZ4EG01CG3KJ	k__Bacteria(100);p__Proteobacteria(100);c__Betaproteobacteria(100);o__Burkholderiales(96);unclassified;unclassified;unclassified;
ICSZ4EG01CD0A5	k__Bacteria(100);p__Proteobacteria(100);c__Alphaproteobacteria(100);o__Sphingomonadales(100);f__Sphingomonadaceae(100);g__Sphingomonas(100);s__Caulobacterleidyi(100);
ICSZ4EG01CCDXN	k__Bacteria(100);p__Bacteroidetes(100);c__Flavobacteria(100);o__Flavobacteriales(100);f__Flavobacteriaceae(100);g__Chryseobacterium(89);unclassified;
ICSZ4EG01CCCJQ	k__Bacteria(100);p__Proteobacteria(100);c__Betaproteobacteria(100);o__Burkholderiales(100);f__Burkholderiaceae(100);g__Ralstonia(100);unclassified;
ICSZ4EG01CC9G1	k__Bacteria(100);p__Proteobacteria(100);c__Betaproteobacteria(100);o__Burkholderiales(100);f__Burkholderiaceae(100);g__Ralstonia(100);unclassified;
ICSZ4EG01C95T0	k__Bacteria(100);p__Proteobacteria(100);c__Betaproteobacteria(100);o__Burkholderiales(100);unclassified;unclassified;unclassified;
ICSZ4EG01C8AOF	k__Bacteria(100);p__Proteobacteria(100);c__Betaproteobacteria(100);o__Burkholderiales(100);f__Burkholderiaceae(100);g__Ralstonia(100);unclassified;
ICSZ4EG01BX2JL	k__Bacteria(99);unclassified;unclassified;unclassified;unclassified;unclassified;unclassified;
ICSZ4EG01BWEQJ	k__Bacteria(100);p__Proteobacteria(100);c__Betaproteobacteria(100);o__Burkholderiales(100);f__Burkholderiaceae(91);g__Ralstonia(89);unclassified;
ICSZ4EG01BQOHP	k__Bacteria(100);p__Proteobacteria(100);c__Alphaproteobacteria(100);o__Sphingomonadales(100);f__Sphingomonadaceae(100);g__Sphingomonas(100);s__Caulobacterleidyi(100);
ICSZ4EG01BQHPM	k__Bacteria(100);p__Proteobacteria(100);c__Alphaproteobacteria(100);o__Sphingomonadales(100);f__Sphingomonadaceae(100);g__Sphingomonas(99);s__Caulobacterleidyi(99);
ICSZ4EG02FLJ0I	k__Bacteria(100);p__Proteobacteria(100);c__Betaproteobacteria(100);o__Burkholderiales(100);f__Burkholderiaceae(99);g__Ralstonia(91);unclassified;
ICSZ4EG01BL1CB	k__Bacteria(100);p__Proteobacteria(100);c__Alphaproteobacteria(100);o__Rhizobiales(100);f__Bradyrhizobiaceae(100);unclassified;unclassified;
ICSZ4EG01BK4Q7	k__Bacteria(100);p__Proteobacteria(100);c__Alphaproteobacteria(100);o__Sphingomonadales(100);f__Sphingomonadaceae(100);g__Sphingomonas(100);s__Caulobacterleidyi(100);
ICSZ4EG01BJYE0	k__Bacteria(100);p__Proteobacteria(100);c__Betaproteobacteria(100);o__Burkholderiales(100);f__Burkholderiaceae(100);g__Ralstonia(97);unclassified;
ICSZ4EG01BIFG1	k__Bacteria(100);p__Proteobacteria(100);c__Alphaproteobacteria(100);o__Sphingomonadales(100);f__Sphingomonadaceae(100);g__Sphingomonas(100);s__Caulobacterleidyi(97);
ICSZ4EG01BHFDP	k__Bacteria(100);p__Proteobacteria(100);c__Betaproteobacteria(100);o__Burkholderiales(100);f__Burkholderiaceae(100);g__Ralstonia(99);unclassified;
ICSZ4EG01CD9IE	k__Bacteria(100);p__Proteobacteria(100);c__Betaproteobacteria(98);o__Burkholderiales(98);f__Comamonadaceae(86);g__Diaphorobacter(80);unclassified;
ICSZ4EG01B2R4C	k__Bacteria(100);p__Proteobacteria(100);c__Alphaproteobacteria(100);o__Sphingomonadales(100);f__Sphingomonadaceae(100);g__Sphingomonas(99);s__Caulobacterleidyi(99);
ICSZ4EG01B2E28	k__Bacteria(100);p__Proteobacteria(100);c__Alphaproteobacteria(100);o__Sphingomonadales(100);f__Sphingomonadaceae(100);g__Sphingomonas(100);s__Caulobacterleidyi(100);
ICSZ4EG01AXMT0	k__Bacteria(100);p__Proteobacteria(99);c__Alphaproteobacteria(99);o__Sphingomonadales(98);f__Sphingomonadaceae(97);g__Sphingomonas(96);s__Caulobacterleidyi(96);
ICSZ4EG01B0ZV4	k__Bacteria(100);p__Proteobacteria(100);c__Betaproteobacteria(100);o__Burkholderiales(100);f__Comamonadaceae(100);g__Acidovorax(97);s__Acidovoraxcaen(92);
ICSZ4EG01ARQM1	k__Bacteria(100);p__Proteobacteria(100);c__Alphaproteobacteria(100);o__Sphingomonadales(100);f__Sphingomonadaceae(100);g__Sphingomonas(99);s__Caulobacterleidyi(99);
ICSZ4EG01AOXT7	k__Bacteria(100);p__Proteobacteria(100);c__Alphaproteobacteria(100);o__Sphingomonadales(100);f__Sphingomonadaceae(100);g__Sphingomonas(98);s__Caulobacterleidyi(98);
ICSZ4EG01D02FH	k__Bacteria(100);p__Proteobacteria(100);c__Betaproteobacteria(100);o__Burkholderiales(100);f__Comamonadaceae(100);g__Acidovorax(100);s__Acidovoraxcaen(98);
ICSZ4EG01EIDSM	k__Bacteria(100);p__Proteobacteria(100);c__Betaproteobacteria(100);o__Burkholderiales(100);f__Comamonadaceae(100);g__Acidovorax(99);s__Acidovoraxcaen(92);
ICSZ4EG01BWWVW	k__Bacteria(100);p__Proteobacteria(100);c__Betaproteobacteria(100);o__Burkholderiales(98);f__Comamonadaceae(98);unclassified;unclassified;
ICSZ4EG01DGV64	k__Bacteria(100);p__Firmicutes(100);c__Bacilli(100);o__Lactobacillales(100);f__Carnobacteriaceae(100);unclassified;unclassified;
ICSZ4EG01DETZA	k__Bacteria(100);p__Proteobacteria(100);c__Betaproteobacteria(100);o__Burkholderiales(100);f__Comamonadaceae(100);g__Diaphorobacter(98);unclassified;
ICSZ4EG01CT97C	k__Bacteria(100);p__Bacteroidetes(100);c__Flavobacteria(100);o__Flavobacteriales(100);f__Flavobacteriaceae(100);unclassified;unclassified;
ICSZ4EG01CJ4Y0	k__Bacteria(100);p__Proteobacteria(100);c__Betaproteobacteria(100);o__Burkholderiales(100);f__Comamonadaceae(100);g__Acidovorax(90);unclassified;
ICSZ4EG01DZX0B	k__Bacteria(100);p__Proteobacteria(100);c__Betaproteobacteria(100);unclassified;unclassified;unclassified;unclassified;
ICSZ4EG01C0YBP	k__Bacteria(100);p__Proteobacteria(100);c__Betaproteobacteria(100);o__Burkholderiales(100);f__Comamonadaceae(100);g__Acidovorax(95);unclassified;
ICSZ4EG01A7BPM	k__Bacteria(100);p__Proteobacteria(100);c__Alphaproteobacteria(100);o__Sphingomonadales(100);f__Sphingomonadaceae(100);g__Sphingomonas(99);s__Caulobacterleidyi(99);
ICSZ4EG01EX5VP	k__Bacteria(100);p__Proteobacteria(100);c__Betaproteobacteria(100);o__Burkholderiales(97);unclassified;unclassified;unclassified;
ICSZ4EG01ERWWD	k__Bacteria(100);p__Thermi(100);c__Deinococci(100);o__Deinococcales(100);f__Deinococcaceae(100);g__Deinococcus(100);unclassified;
ICSZ4EG01EI7OA	k__Bacteria(100);p__Proteobacteria(100);c__Betaproteobacteria(100);o__Burkholderiales(100);f__Comamonadaceae(100);g__Acidovorax(92);unclassified;
ICSZ4EG01BLAMH	k__Bacteria(100);p__Proteobacteria(100);c__Betaproteobacteria(100);o__Burkholderiales(100);f__Comamonadaceae(100);unclassified;unclassified;
ICSZ4EG01EC7RU	k__Bacteria(100);p__Proteobacteria(100);c__Betaproteobacteria(100);o__Burkholderiales(98);unclassified;unclassified;unclassified;
ICSZ4EG01DZSVH	k__Bacteria(100);p__Proteobacteria(100);c__Betaproteobacteria(100);o__Burkholderiales(100);f__Comamonadaceae(100);g__Diaphorobacter(90);unclassified;
ICSZ4EG01DSV5K	k__Bacteria(100);p__Bacteroidetes(100);c__Flavobacteria(100);o__Flavobacteriales(100);f__Flavobacteriaceae(100);unclassified;unclassified;
ICSZ4EG01DS0QT	k__Bacteria(99);p__Proteobacteria(98);c__Betaproteobacteria(94);o__Burkholderiales(91);unclassified;unclassified;unclassified;
ICSZ4EG01DR77S	k__Bacteria(100);p__Proteobacteria(100);c__Betaproteobacteria(100);o__Burkholderiales(100);f__Comamonadaceae(100);g__Acidovorax(88);unclassified;
ICSZ4EG01D9QXM	k__Bacteria(100);p__Proteobacteria(100);c__Betaproteobacteria(100);o__Burkholderiales(99);f__Comamonadaceae(99);g__Diaphorobacter(87);unclassified;
ICSZ4EG01D937W	k__Bacteria(100);p__Bacteroidetes(100);c__Flavobacteria(100);o__Flavobacteriales(100);f__Flavobacteriaceae(100);unclassified;unclassified;
ICSZ4EG01D8HI2	k__Bacteria(100);p__Proteobacteria(100);c__Betaproteobacteria(100);o__Burkholderiales(100);f__Comamonadaceae(100);g__Diaphorobacter(96);unclassified;
ICSZ4EG01D7QRX	k__Bacteria(100);p__Proteobacteria(99);c__Betaproteobacteria(99);o__Burkholderiales(97);unclassified;unclassified;unclassified;
ICSZ4EG01D644K	k__Bacteria(100);p__Proteobacteria(100);c__Betaproteobacteria(100);o__Burkholderiales(100);f__Comamonadaceae(100);g__Acidovorax(96);unclassified;
ICSZ4EG01D5Q8G	k__Bacteria(100);p__Proteobacteria(100);c__Betaproteobacteria(100);o__Burkholderiales(100);f__Comamonadaceae(100);g__Acidovorax(84);unclassified;
ICSZ4EG01D1N7V	k__Bacteria(100);unclassified;unclassified;unclassified;unclassified;unclassified;unclassified;
ICSZ4EG01CX64K	k__Bacteria(100);p__Proteobacteria(100);c__Alphaproteobacteria(100);o__Sphingomonadales(100);f__Sphingomonadaceae(100);g__Sphingomonas(100);s__Caulobacterleidyi(100);
ICSZ4EG01CX4Z6	k__Bacteria(100);p__Bacteroidetes(100);c__Flavobacteria(100);o__Flavobacteriales(100);f__Flavobacteriaceae(100);unclassified;unclassified;
ICSZ4EG01CTWDV	k__Bacteria(100);p__Actinobacteria(100);c__Actinobacteria(100);o__Actinomycetales(100);f__Corynebacteriaceae(100);g__Corynebacterium(100);unclassified;
ICSZ4EG01CSCFG	k__Bacteria(100);p__Proteobacteria(100);c__Betaproteobacteria(100);o__Burkholderiales(100);f__Comamonadaceae(100);g__Diaphorobacter(99);unclassified;
ICSZ4EG01CRI5B	k__Bacteria(100);p__Proteobacteria(100);c__Betaproteobacteria(100);o__Burkholderiales(99);f__Comamonadaceae(83);unclassified;unclassified;
ICSZ4EG01CRI0I	k__Bacteria(100);p__Proteobacteria(98);c__Betaproteobacteria(97);o__Burkholderiales(96);unclassified;unclassified;unclassified;
ICSZ4EG01CNZH1	k__Bacteria(99);p__Bacteroidetes(92);c__Bacteroidia(91);o__Bacteroidales(91);unclassified;unclassified;unclassified;
ICSZ4EG01CJ9DV	k__Bacteria(100);p__Proteobacteria(100);c__Betaproteobacteria(100);o__Burkholderiales(100);f__Comamonadaceae(100);g__Acidovorax(92);unclassified;
ICSZ4EG01CG2QT	k__Bacteria(100);p__Proteobacteria(100);c__Betaproteobacteria(100);o__Burkholderiales(100);f__Comamonadaceae(83);unclassified;unclassified;
ICSZ4EG01CDV18	k__Bacteria(100);p__Proteobacteria(100);c__Betaproteobacteria(100);o__Burkholderiales(100);f__Comamonadaceae(100);g__Acidovorax(96);unclassified;
ICSZ4EG01CD3AQ	k__Bacteria(100);p__Proteobacteria(100);c__Betaproteobacteria(97);o__Burkholderiales(95);unclassified;unclassified;unclassified;
ICSZ4EG01C6FA6	k__Bacteria(100);p__Proteobacteria(100);c__Alphaproteobacteria(100);o__Sphingomonadales(100);f__Sphingomonadaceae(100);g__Sphingomonas(99);s__Caulobacterleidyi(99);
ICSZ4EG01BXYJ8	k__Bacteria(100);p__Proteobacteria(100);c__Alphaproteobacteria(100);o__Sphingomonadales(100);f__Sphingomonadaceae(100);g__Sphingomonas(94);s__Caulobacterleidyi(92);
ICSZ4EG01BUY5O	k__Bacteria(100);p__Proteobacteria(100);c__Alphaproteobacteria(100);o__Sphingomonadales(100);f__Sphingomonadaceae(100);g__Sphingomonas(99);s__Caulobacterleidyi(98);
ICSZ4EG01BPJ8L	k__Bacteria(100);unclassified;unclassified;unclassified;unclassified;unclassified;unclassified;
ICSZ4EG01BPERB	k__Bacteria(100);p__Proteobacteria(99);c__Betaproteobacteria(97);o__Burkholderiales(95);unclassified;unclassified;unclassified;
ICSZ4EG02IM5BT	k__Bacteria(100);p__Proteobacteria(100);c__Betaproteobacteria(100);o__Burkholderiales(100);f__Comamonadaceae(100);unclassified;unclassified;
ICSZ4EG01BMWCU	k__Bacteria(100);p__Proteobacteria(100);c__Betaproteobacteria(100);o__Burkholderiales(100);f__Comamonadaceae(100);g__Delftia(98);unclassified;
ICSZ4EG01BI55P	k__Bacteria(100);p__Proteobacteria(100);c__Alphaproteobacteria(100);o__Sphingomonadales(100);f__Sphingomonadaceae(100);g__Sphingomonas(98);s__Caulobacterleidyi(98);
ICSZ4EG01BH10O	k__Bacteria(100);p__Proteobacteria(100);c__Betaproteobacteria(100);o__Burkholderiales(95);unclassified;unclassified;unclassified;
ICSZ4EG01BB87N	k__Bacteria(100);p__Proteobacteria(100);c__Betaproteobacteria(100);o__Burkholderiales(100);f__Comamonadaceae(100);g__Acidovorax(96);unclassified;
ICSZ4EG01BAUSP	k__Bacteria(100);p__Bacteroidetes(100);c__Flavobacteria(100);o__Flavobacteriales(100);f__Flavobacteriaceae(100);unclassified;unclassified;
ICSZ4EG01B6OCD	k__Bacteria(100);p__Proteobacteria(100);c__Alphaproteobacteria(100);o__Rhizobiales(100);f__Bradyrhizobiaceae(100);unclassified;unclassified;
ICSZ4EG01ARD5Z	k__Bacteria(100);p__Proteobacteria(100);c__Alphaproteobacteria(100);o__Sphingomonadales(100);f__Sphingomonadaceae(100);g__Sphingomonas(99);s__Caulobacterleidyi(99);
ICSZ4EG01APX0X	k__Bacteria(100);p__Proteobacteria(100);c__Betaproteobacteria(100);o__Burkholderiales(100);f__Comamonadaceae(100);unclassified;unclassified;
ICSZ4EG01APHPD	k__Bacteria(100);p__Proteobacteria(100);c__Betaproteobacteria(100);o__Rhodocyclales(99);f__Rhodocyclaceae(99);g__Dechloromonas(95);unclassified;
ICSZ4EG01AIZ3W	k__Bacteria(100);p__Proteobacteria(100);c__Alphaproteobacteria(100);o__Sphingomonadales(100);f__Sphingomonadaceae(100);g__Sphingomonas(100);s__Caulobacterleidyi(100);
ICSZ4EG01A8PHP	k__Bacteria(100);p__Proteobacteria(100);c__Betaproteobacteria(100);o__Burkholderiales(100);f__Comamonadaceae(100);unclassified;unclassified;
ICSZ4EG01A7PS7	k__Bacteria(100);p__Proteobacteria(100);c__Betaproteobacteria(100);o__Burkholderiales(100);f__Comamonadaceae(100);g__Acidovorax(90);unclassified;
ICSZ4EG01A4MGV	k__Bacteria(100);p__Proteobacteria(100);c__Betaproteobacteria(100);o__Burkholderiales(100);f__Comamonadaceae(100);g__Acidovorax(100);s__Acidovoraxcaen(93);
ICSZ4EG01B3NJ7	k__Bacteria(100);p__Proteobacteria(100);c__Betaproteobacteria(100);o__Burkholderiales(100);f__Comamonadaceae(91);unclassified;unclassified;
ICSZ4EG01DR1L3	k__Bacteria(99);p__Firmicutes(96);c__Clostridia(93);o__Clostridiales(93);f__Lachnospiraceae(93);unclassified;unclassified;
ICSZ4EG01ED1W5	k__Bacteria(100);p__Proteobacteria(100);c__Betaproteobacteria(100);o__Hydrogenophilales(100);f__Hydrogenophilaceae(100);g__Hydrogenophilus(100);unclassified;
ICSZ4EG01ENR9H	k__Bacteria(100);p__Proteobacteria(100);c__Betaproteobacteria(100);o__Rhodocyclales(100);f__Rhodocyclaceae(100);g__Dechloromonas(97);unclassified;
ICSZ4EG01A0Z15	k__Bacteria(100);p__Proteobacteria(100);c__Betaproteobacteria(100);o__Burkholderiales(98);unclassified;unclassified;unclassified;
ICSZ4EG01EUW0O	k__Bacteria(100);p__Proteobacteria(100);c__Betaproteobacteria(100);o__Burkholderiales(100);f__Comamonadaceae(100);unclassified;unclassified;
ICSZ4EG01EUKD9	k__Bacteria(100);p__Bacteroidetes(100);c__Flavobacteria(100);o__Flavobacteriales(100);f__Flavobacteriaceae(100);unclassified;unclassified;
ICSZ4EG01ETCQ4	k__Bacteria(100);p__Proteobacteria(100);c__Alphaproteobacteria(100);o__Sphingomonadales(100);f__Sphingomonadaceae(100);g__Sphingomonas(97);s__Caulobacterleidyi(97);
ICSZ4EG01EOMOQ	k__Bacteria(100);p__Proteobacteria(100);c__Alphaproteobacteria(100);o__Sphingomonadales(100);f__Sphingomonadaceae(100);g__Sphingomonas(100);s__Caulobacterleidyi(99);
ICSZ4EG01EN66V	k__Bacteria(100);p__Proteobacteria(100);c__Alphaproteobacteria(100);o__Sphingomonadales(100);f__Sphingomonadaceae(100);g__Sphingomonas(100);s__Caulobacterleidyi(100);
ICSZ4EG01EGINU	k__Bacteria(100);p__Proteobacteria(100);c__Alphaproteobacteria(100);o__Sphingomonadales(100);f__Sphingomonadaceae(100);g__Sphingomonas(100);s__Caulobacterleidyi(100);
ICSZ4EG01EEN7D	k__Bacteria(100);p__Proteobacteria(100);c__Alphaproteobacteria(100);o__Sphingomonadales(100);f__Sphingomonadaceae(100);g__Sphingomonas(92);s__Caulobacterleidyi(92);
ICSZ4EG01DNJUZ	k__Bacteria(100);p__Proteobacteria(100);c__Betaproteobacteria(100);o__Burkholderiales(100);f__Comamonadaceae(100);g__Acidovorax(89);unclassified;
ICSZ4EG02HKEVK	k__Bacteria(100);unclassified;unclassified;unclassified;unclassified;unclassified;unclassified;
ICSZ4EG01DUXQU	k__Bacteria(100);p__Proteobacteria(100);c__Alphaproteobacteria(100);o__Sphingomonadales(100);f__Sphingomonadaceae(100);g__Sphingomonas(99);s__Caulobacterleidyi(99);
ICSZ4EG01DTL94	k__Bacteria(100);p__Proteobacteria(100);c__Betaproteobacteria(95);o__Burkholderiales(95);unclassified;unclassified;unclassified;
ICSZ4EG01DSROL	k__Bacteria(100);p__Proteobacteria(100);c__Betaproteobacteria(100);o__Burkholderiales(100);f__Comamonadaceae(100);g__Diaphorobacter(99);unclassified;
ICSZ4EG02GDQI8	k__Bacteria(100);p__Proteobacteria(100);c__Betaproteobacteria(100);o__Burkholderiales(98);unclassified;unclassified;unclassified;
ICSZ4EG01DKRAC	k__Bacteria(100);p__Proteobacteria(100);c__Alphaproteobacteria(100);o__Sphingomonadales(100);f__Sphingomonadaceae(100);g__Sphingomonas(100);s__Caulobacterleidyi(100);
ICSZ4EG01DBM1A	k__Bacteria(100);p__Proteobacteria(100);c__Alphaproteobacteria(100);o__Sphingomonadales(100);f__Sphingomonadaceae(99);g__Sphingomonas(96);s__Caulobacterleidyi(94);
ICSZ4EG01D27D7	k__Bacteria(100);p__Proteobacteria(99);c__Betaproteobacteria(99);o__Burkholderiales(99);unclassified;unclassified;unclassified;
ICSZ4EG01CUEOM	k__Bacteria(100);p__Proteobacteria(100);c__Betaproteobacteria(100);o__Burkholderiales(100);f__Comamonadaceae(100);g__Comamonas(100);unclassified;
ICSZ4EG01CSI8T	k__Bacteria(100);p__Proteobacteria(100);c__Alphaproteobacteria(100);o__Sphingomonadales(100);f__Sphingomonadaceae(99);g__Sphingomonas(99);s__Caulobacterleidyi(99);
ICSZ4EG01CRI4Q	k__Bacteria(100);p__Proteobacteria(100);c__Alphaproteobacteria(100);o__Sphingomonadales(99);f__Sphingomonadaceae(99);g__Sphingomonas(98);s__Caulobacterleidyi(98);
ICSZ4EG01CLTXO	k__Bacteria(100);p__Proteobacteria(100);c__Alphaproteobacteria(100);o__Sphingomonadales(100);f__Sphingomonadaceae(100);g__Sphingomonas(100);s__Caulobacterleidyi(100);
ICSZ4EG01CLCX1	k__Bacteria(100);p__Bacteroidetes(95);c__Bacteroidia(90);o__Bacteroidales(90);unclassified;unclassified;unclassified;
ICSZ4EG01CCDMP	k__Bacteria(100);p__Proteobacteria(100);c__Betaproteobacteria(100);o__Burkholderiales(100);f__Comamonadaceae(100);unclassified;unclassified;
ICSZ4EG01C8K53	k__Bacteria(100);p__Proteobacteria(100);c__Alphaproteobacteria(100);o__Sphingomonadales(100);f__Sphingomonadaceae(100);g__Sphingomonas(100);s__Caulobacterleidyi(100);
ICSZ4EG01C6HCL	k__Bacteria(100);p__Proteobacteria(100);c__Alphaproteobacteria(100);o__Sphingomonadales(100);f__Sphingomonadaceae(100);g__Sphingomonas(100);s__Caulobacterleidyi(100);
ICSZ4EG01C66N0	k__Bacteria(100);p__Proteobacteria(100);c__Betaproteobacteria(100);o__Burkholderiales(100);f__Comamonadaceae(100);g__Diaphorobacter(98);unclassified;
ICSZ4EG01C60DL	k__Bacteria(100);p__Proteobacteria(100);c__Gammaproteobacteria(100);o__Xanthomonadales(100);f__Xanthomonadaceae(100);g__Xanthomonas(96);s__Xanthomonasaxonopodi(95);
ICSZ4EG01C3GM5	k__Bacteria(100);p__Proteobacteria(100);c__Betaproteobacteria(100);o__Burkholderiales(100);f__Comamonadaceae(100);g__Acidovorax(87);unclassified;
ICSZ4EG01C29PR	k__Bacteria(100);p__Proteobacteria(100);c__Alphaproteobacteria(100);o__Sphingomonadales(100);f__Sphingomonadaceae(100);g__Sphingomonas(100);s__Caulobacterleidyi(100);
ICSZ4EG01BUVQH	k__Bacteria(100);p__Actinobacteria(100);c__Actinobacteria(100);o__Actinomycetales(100);f__Corynebacteriaceae(100);g__Corynebacterium(100);s__Corynebacteriumtuberculostearicu(92);
ICSZ4EG01BSTK6	k__Bacteria(100);p__Proteobacteria(99);c__Betaproteobacteria(99);o__Burkholderiales(94);unclassified;unclassified;unclassified;
ICSZ4EG01BSORW	k__Bacteria(100);p__Proteobacteria(100);c__Betaproteobacteria(100);o__Burkholderiales(100);f__Comamonadaceae(100);unclassified;unclassified;
ICSZ4EG01BKT76	k__Bacteria(100);p__Proteobacteria(100);c__Alphaproteobacteria(100);o__Sphingomonadales(100);f__Sphingomonadaceae(100);g__Sphingomonas(98);s__Caulobacterleidyi(98);
ICSZ4EG01BKLEP	k__Bacteria(100);p__Proteobacteria(100);c__Alphaproteobacteria(100);o__Sphingomonadales(100);f__Sphingomonadaceae(100);g__Sphingomonas(100);s__Caulobacterleidyi(100);
ICSZ4EG01BKIRU	k__Bacteria(100);p__Proteobacteria(100);c__Alphaproteobacteria(100);o__Sphingomonadales(99);f__Sphingomonadaceae(99);g__Sphingomonas(98);s__Caulobacterleidyi(98);
ICSZ4EG01BH37H	k__Bacteria(100);p__Proteobacteria(99);c__Betaproteobacteria(98);o__Burkholderiales(96);unclassified;unclassified;unclassified;
ICSZ4EG01BF3D3	k__Bacteria(100);p__Proteobacteria(100);c__Betaproteobacteria(100);o__Burkholderiales(100);f__Comamonadaceae(83);unclassified;unclassified;
ICSZ4EG01BC2T3	k__Bacteria(100);unclassified;unclassified;unclassified;unclassified;unclassified;unclassified;
ICSZ4EG01BAEPN	k__Bacteria(100);p__Proteobacteria(100);c__Alphaproteobacteria(100);o__Sphingomonadales(100);f__Sphingomonadaceae(100);g__Sphingomonas(99);s__Caulobacterleidyi(99);
ICSZ4EG01B8ZRE	k__Bacteria(99);p__Firmicutes(87);c__Clostridia(85);o__Clostridiales(85);f__Lachnospiraceae(84);unclassified;unclassified;
ICSZ4EG01B1HMX	k__Bacteria(100);p__Proteobacteria(98);c__Betaproteobacteria(96);o__Burkholderiales(94);unclassified;unclassified;unclassified;
ICSZ4EG01ASUEF	k__Bacteria(100);p__Proteobacteria(100);c__Betaproteobacteria(100);o__Burkholderiales(97);unclassified;unclassified;unclassified;
ICSZ4EG01AO350	k__Bacteria(100);p__Proteobacteria(100);c__Alphaproteobacteria(100);o__Sphingomonadales(100);f__Sphingomonadaceae(100);g__Sphingomonas(100);s__Caulobacterleidyi(100);
ICSZ4EG01AMYPT	k__Bacteria(100);p__Proteobacteria(100);c__Alphaproteobacteria(100);o__Rhizobiales(100);f__Bradyrhizobiaceae(100);unclassified;unclassified;
ICSZ4EG01AKCIZ	k__Bacteria(100);p__Proteobacteria(100);c__Betaproteobacteria(100);o__Burkholderiales(100);f__Comamonadaceae(100);g__Acidovorax(99);s__Acidovoraxcaen(93);
ICSZ4EG01CU21V	k__Bacteria(100);p__Proteobacteria(100);c__Alphaproteobacteria(100);o__Sphingomonadales(100);f__Sphingomonadaceae(100);unclassified;unclassified;
ICSZ4EG01EA1P5	k__Bacteria(99);p__Firmicutes(85);c__Clostridia(82);o__Clostridiales(82);unclassified;unclassified;unclassified;
ICSZ4EG01DYR5U	k__Bacteria(100);p__Bacteroidetes(97);c__Bacteroidia(97);o__Bacteroidales(97);unclassified;unclassified;unclassified;
ICSZ4EG01DS594	k__Bacteria(100);p__Proteobacteria(100);c__Betaproteobacteria(100);o__Burkholderiales(100);f__Comamonadaceae(100);g__Comamonas(100);unclassified;
ICSZ4EG01D74AL	k__Bacteria(100);p__Firmicutes(100);c__Bacilli(100);o__Bacillales(100);f__Bacillaceae(99);g__Bacillus(99);unclassified;
ICSZ4EG01C44FI	k__Bacteria(100);p__Proteobacteria(100);c__Betaproteobacteria(100);o__Burkholderiales(100);f__Comamonadaceae(100);g__Hylemonella(100);unclassified;
ICSZ4EG01CA2SU	k__Bacteria(100);p__Firmicutes(100);c__Clostridia(100);o__Clostridiales(100);f__Lachnospiraceae(100);g__Clostridium(100);s__Clostridiumcelerecrescen(98);
ICSZ4EG01DJQH6	k__Bacteria(100);p__Firmicutes(100);c__Bacilli(100);o__Bacillales(100);f__Staphylococcaceae(100);g__Staphylococcus(100);s__Staphylococcusepidermidi(99);
ICSZ4EG01EI4RP	k__Bacteria(99);unclassified;unclassified;unclassified;unclassified;unclassified;unclassified;
ICSZ4EG01CR1QH	k__Bacteria(97);p__Proteobacteria(90);c__Alphaproteobacteria(85);unclassified;unclassified;unclassified;unclassified;
ICSZ4EG01C41G2	k__Bacteria(100);p__Firmicutes(100);c__Clostridia(100);o__Clostridiales(100);f__Ruminococcaceae(100);g__Oscillospira(100);unclassified;
ICSZ4EG01CD1OS	k__Bacteria(100);p__Bacteroidetes(100);c__Flavobacteria(100);o__Flavobacteriales(100);f__Flavobacteriaceae(100);unclassified;unclassified;
ICSZ4EG01EJ09P	k__Bacteria(100);p__Proteobacteria(100);c__Betaproteobacteria(100);o__Burkholderiales(100);f__Comamonadaceae(100);unclassified;unclassified;
ICSZ4EG01DX9WJ	k__Bacteria(100);p__Proteobacteria(100);c__Betaproteobacteria(100);unclassified;unclassified;unclassified;unclassified;
ICSZ4EG01D15J0	k__Bacteria(99);unclassified;unclassified;unclassified;unclassified;unclassified;unclassified;
ICSZ4EG01DEGL5	k__Bacteria(100);p__Proteobacteria(100);c__Betaproteobacteria(100);o__Burkholderiales(93);f__Comamonadaceae(93);g__Acidovorax(93);s__Acidovoraxcaen(92);
ICSZ4EG01AM48P	k__Bacteria(100);p__Proteobacteria(100);c__Betaproteobacteria(100);o__Burkholderiales(99);f__Comamonadaceae(99);unclassified;unclassified;
ICSZ4EG01EOOKR	k__Bacteria(100);p__Proteobacteria(100);c__Betaproteobacteria(100);o__Burkholderiales(99);f__Comamonadaceae(94);unclassified;unclassified;
ICSZ4EG01EKN7G	k__Bacteria(100);p__Proteobacteria(100);c__Betaproteobacteria(100);o__Burkholderiales(100);f__Comamonadaceae(100);g__Acidovorax(97);unclassified;
ICSZ4EG01DUA2K	k__Bacteria(100);p__Proteobacteria(100);c__Betaproteobacteria(100);o__Burkholderiales(99);f__Comamonadaceae(99);unclassified;unclassified;
ICSZ4EG01DSPUZ	k__Bacteria(100);p__Bacteroidetes(100);c__Flavobacteria(100);o__Flavobacteriales(100);f__Flavobacteriaceae(100);unclassified;unclassified;
ICSZ4EG01B63WI	k__Bacteria(100);p__Proteobacteria(100);c__Betaproteobacteria(100);unclassified;unclassified;unclassified;unclassified;
ICSZ4EG01CPP3M	k__Bacteria(100);p__Proteobacteria(100);c__Betaproteobacteria(100);o__Burkholderiales(99);f__Comamonadaceae(98);g__Acidovorax(86);s__Acidovoraxcaen(83);
ICSZ4EG01C4M6C	k__Bacteria(100);p__Proteobacteria(100);c__Betaproteobacteria(100);o__Burkholderiales(100);f__Comamonadaceae(100);g__Acidovorax(89);unclassified;
ICSZ4EG01A68XD	k__Bacteria(100);p__Proteobacteria(100);c__Betaproteobacteria(100);o__Rhodocyclales(85);f__Rhodocyclaceae(85);unclassified;unclassified;
ICSZ4EG01C89UH	k__Bacteria(100);p__Proteobacteria(100);c__Betaproteobacteria(100);o__Burkholderiales(99);unclassified;unclassified;unclassified;
ICSZ4EG01C92N5	k__Bacteria(100);p__Proteobacteria(100);c__Betaproteobacteria(100);unclassified;unclassified;unclassified;unclassified;
ICSZ4EG01BXBT7	k__Bacteria(100);p__Proteobacteria(100);c__Betaproteobacteria(100);o__Burkholderiales(100);f__Comamonadaceae(100);unclassified;unclassified;
ICSZ4EG01EW50S	k__Bacteria(100);p__Proteobacteria(100);c__Betaproteobacteria(100);o__Burkholderiales(100);f__Comamonadaceae(100);unclassified;unclassified;
ICSZ4EG01BFVF6	k__Bacteria(100);p__Proteobacteria(100);c__Betaproteobacteria(100);o__Burkholderiales(100);unclassified;unclassified;unclassified;
ICSZ4EG01BEMZH	k__Bacteria(99);p__Proteobacteria(99);c__Betaproteobacteria(97);o__Burkholderiales(95);unclassified;unclassified;unclassified;
ICSZ4EG01C3K3Y	k__Bacteria(100);p__Proteobacteria(100);c__Betaproteobacteria(100);o__Burkholderiales(100);f__Comamonadaceae(100);unclassified;unclassified;
ICSZ4EG01B769H	k__Bacteria(100);p__Proteobacteria(100);c__Betaproteobacteria(100);o__Burkholderiales(100);f__Comamonadaceae(100);g__Comamonas(100);unclassified;
ICSZ4EG01AP906	k__Bacteria(100);p__Bacteroidetes(100);c__Flavobacteria(100);o__Flavobacteriales(100);f__Flavobacteriaceae(100);g__Chryseobacterium(90);unclassified;
ICSZ4EG01ANNPN	k__Bacteria(100);p__Bacteroidetes(100);c__Flavobacteria(99);o__Flavobacteriales(99);f__Flavobacteriaceae(99);unclassified;unclassified;
ICSZ4EG01AKTNE	k__Bacteria(100);p__Proteobacteria(100);c__Betaproteobacteria(100);o__Burkholderiales(99);unclassified;unclassified;unclassified;
ICSZ4EG01EZ93R	k__Bacteria(100);p__Bacteroidetes(100);c__Flavobacteria(100);o__Flavobacteriales(100);f__Flavobacteriaceae(100);unclassified;unclassified;
ICSZ4EG01EXSUT	k__Bacteria(100);p__Proteobacteria(100);c__Betaproteobacteria(100);o__Burkholderiales(100);f__Comamonadaceae(100);unclassified;unclassified;
ICSZ4EG01EXKZ7	k__Bacteria(100);p__Proteobacteria(95);c__Betaproteobacteria(93);o__Burkholderiales(93);unclassified;unclassified;unclassified;
ICSZ4EG01EWBZ6	k__Bacteria(100);p__Proteobacteria(100);c__Betaproteobacteria(100);o__Burkholderiales(100);f__Comamonadaceae(100);g__Acidovorax(93);unclassified;
ICSZ4EG01EWB61	k__Bacteria(100);p__Proteobacteria(100);c__Betaproteobacteria(100);o__Burkholderiales(100);f__Comamonadaceae(100);g__Alicycliphilus(81);unclassified;
ICSZ4EG01EW1WE	k__Bacteria(100);p__Proteobacteria(100);c__Betaproteobacteria(100);o__Burkholderiales(100);f__Comamonadaceae(100);unclassified;unclassified;
ICSZ4EG01C5918	k__Bacteria(100);p__Proteobacteria(100);c__Betaproteobacteria(100);o__Burkholderiales(94);unclassified;unclassified;unclassified;
ICSZ4EG01EV1QT	k__Bacteria(100);p__Proteobacteria(100);c__Alphaproteobacteria(100);o__Sphingomonadales(100);f__Sphingomonadaceae(100);g__Sphingomonas(93);s__Caulobacterleidyi(93);
ICSZ4EG01EUHPQ	k__Bacteria(100);p__Proteobacteria(100);c__Betaproteobacteria(100);o__Burkholderiales(100);f__Comamonadaceae(100);g__Acidovorax(87);unclassified;
ICSZ4EG02GH6NU	k__Bacteria(100);p__Proteobacteria(100);c__Betaproteobacteria(100);o__Burkholderiales(100);f__Comamonadaceae(95);unclassified;unclassified;
ICSZ4EG01EQUDH	k__Bacteria(100);p__Proteobacteria(100);c__Alphaproteobacteria(100);o__Sphingomonadales(100);f__Sphingomonadaceae(100);g__Sphingomonas(98);s__Caulobacterleidyi(98);
ICSZ4EG01EQJJL	k__Bacteria(100);p__Proteobacteria(100);c__Betaproteobacteria(100);o__Burkholderiales(100);f__Alcaligenaceae(100);g__Achromobacter(98);unclassified;
ICSZ4EG01AXE1D	k__Bacteria(100);p__Proteobacteria(100);c__Betaproteobacteria(99);o__Burkholderiales(89);f__Comamonadaceae(86);unclassified;unclassified;
ICSZ4EG01EMY2D	k__Bacteria(100);p__Proteobacteria(100);c__Betaproteobacteria(100);o__Burkholderiales(100);f__Comamonadaceae(100);g__Acidovorax(96);s__Acidovoraxcaen(93);
ICSZ4EG01EMV1J	k__Bacteria(100);p__Proteobacteria(100);c__Betaproteobacteria(100);o__Burkholderiales(100);f__Comamonadaceae(100);unclassified;unclassified;
ICSZ4EG01EK4PS	k__Bacteria(100);p__Proteobacteria(100);c__Betaproteobacteria(100);o__Burkholderiales(100);f__Comamonadaceae(100);g__Acidovorax(99);s__Acidovoraxcaen(93);
ICSZ4EG01EJPSU	k__Bacteria(100);p__Proteobacteria(100);c__Betaproteobacteria(100);o__Burkholderiales(100);f__Comamonadaceae(100);g__Acidovorax(90);unclassified;
ICSZ4EG01EJ9WN	k__Bacteria(100);p__Bacteroidetes(100);c__Flavobacteria(100);o__Flavobacteriales(100);f__Flavobacteriaceae(100);g__Chryseobacterium(87);unclassified;
ICSZ4EG01EHK7L	k__Bacteria(100);p__Proteobacteria(100);c__Betaproteobacteria(100);o__Burkholderiales(100);f__Comamonadaceae(100);g__Acidovorax(91);unclassified;
ICSZ4EG01EH7JS	k__Bacteria(100);p__Proteobacteria(100);c__Betaproteobacteria(100);o__Rhodocyclales(97);f__Rhodocyclaceae(97);g__Dechloromonas(97);unclassified;
ICSZ4EG01EG9PF	k__Bacteria(100);p__Proteobacteria(100);c__Betaproteobacteria(100);o__Burkholderiales(100);f__Comamonadaceae(100);g__Acidovorax(96);s__Acidovoraxcaen(91);
ICSZ4EG01EFFNU	k__Bacteria(100);p__Proteobacteria(100);c__Betaproteobacteria(100);o__Burkholderiales(100);f__Comamonadaceae(100);unclassified;unclassified;
ICSZ4EG01EF2YI	k__Bacteria(100);p__Proteobacteria(99);c__Betaproteobacteria(99);o__Burkholderiales(97);unclassified;unclassified;unclassified;
ICSZ4EG01EDWQT	k__Bacteria(100);p__Proteobacteria(100);c__Betaproteobacteria(100);o__Burkholderiales(100);f__Comamonadaceae(100);g__Acidovorax(97);unclassified;
ICSZ4EG01ED6IL	k__Bacteria(100);p__Bacteroidetes(100);c__Flavobacteria(100);o__Flavobacteriales(100);f__Flavobacteriaceae(100);unclassified;unclassified;
ICSZ4EG01EB4XO	k__Bacteria(100);p__Proteobacteria(100);c__Betaproteobacteria(100);o__Burkholderiales(100);unclassified;unclassified;unclassified;
ICSZ4EG01DZCET	k__Bacteria(100);p__Proteobacteria(100);c__Betaproteobacteria(100);o__Burkholderiales(100);f__Comamonadaceae(100);unclassified;unclassified;
ICSZ4EG01D1CU1	k__Bacteria(100);p__Proteobacteria(99);c__Betaproteobacteria(99);o__Burkholderiales(99);f__Comamonadaceae(80);unclassified;unclassified;
ICSZ4EG01DX4FW	k__Bacteria(100);p__Proteobacteria(100);c__Betaproteobacteria(100);o__Burkholderiales(100);f__Comamonadaceae(100);unclassified;unclassified;
ICSZ4EG01DVL7G	k__Bacteria(100);p__Proteobacteria(100);c__Alphaproteobacteria(100);o__Sphingomonadales(100);f__Sphingomonadaceae(100);g__Sphingomonas(81);unclassified;
ICSZ4EG01DVFXQ	k__Bacteria(100);p__Proteobacteria(100);c__Betaproteobacteria(98);o__Burkholderiales(97);unclassified;unclassified;unclassified;
ICSZ4EG01B0NMF	k__Bacteria(100);p__Proteobacteria(100);c__Betaproteobacteria(100);o__Rhodocyclales(99);f__Rhodocyclaceae(99);g__Dechloromonas(98);unclassified;
ICSZ4EG02IRCTU	k__Bacteria(100);p__Proteobacteria(100);c__Betaproteobacteria(100);o__Rhodocyclales(99);f__Rhodocyclaceae(99);g__Dechloromonas(98);unclassified;
ICSZ4EG01DQHXK	k__Bacteria(100);p__Proteobacteria(100);c__Betaproteobacteria(100);o__Burkholderiales(100);f__Comamonadaceae(100);g__Acidovorax(92);unclassified;
ICSZ4EG01C2DY4	k__Bacteria(100);p__Proteobacteria(100);c__Betaproteobacteria(100);o__Burkholderiales(98);f__Comamonadaceae(85);unclassified;unclassified;
ICSZ4EG01DPVZO	k__Bacteria(100);p__Proteobacteria(100);c__Betaproteobacteria(100);o__Burkholderiales(98);f__Comamonadaceae(98);unclassified;unclassified;
ICSZ4EG01DP91A	k__Bacteria(100);p__Proteobacteria(100);c__Betaproteobacteria(100);o__Burkholderiales(98);f__Comamonadaceae(90);unclassified;unclassified;
ICSZ4EG01DOGK5	k__Bacteria(100);p__Proteobacteria(100);c__Betaproteobacteria(100);o__Burkholderiales(100);f__Comamonadaceae(100);g__Diaphorobacter(95);unclassified;
ICSZ4EG01DMGIF	k__Bacteria(100);p__Firmicutes(100);c__Clostridia(100);o__Clostridiales(100);f__Ruminococcaceae(100);g__Oscillospira(100);unclassified;
ICSZ4EG01DM801	k__Bacteria(100);p__Proteobacteria(100);c__Betaproteobacteria(100);o__Burkholderiales(98);unclassified;unclassified;unclassified;
ICSZ4EG01DLZXX	k__Bacteria(100);p__Proteobacteria(100);c__Betaproteobacteria(100);o__Burkholderiales(100);f__Comamonadaceae(100);g__Acidovorax(87);unclassified;
ICSZ4EG01DLKGW	k__Bacteria(100);p__Proteobacteria(100);c__Betaproteobacteria(98);o__Burkholderiales(96);unclassified;unclassified;unclassified;
ICSZ4EG01DKSC8	k__Bacteria(100);p__Bacteroidetes(100);c__Flavobacteria(99);o__Flavobacteriales(99);f__Flavobacteriaceae(99);unclassified;unclassified;
ICSZ4EG01DKASP	k__Bacteria(100);p__Firmicutes(80);unclassified;unclassified;unclassified;unclassified;unclassified;
ICSZ4EG01DK6AD	k__Bacteria(99);unclassified;unclassified;unclassified;unclassified;unclassified;unclassified;
ICSZ4EG01DJPF1	k__Bacteria(100);p__Proteobacteria(100);c__Betaproteobacteria(98);o__Burkholderiales(95);unclassified;unclassified;unclassified;
ICSZ4EG01DJAUW	k__Bacteria(100);p__Firmicutes(100);c__Clostridia(100);o__Clostridiales(100);f__ClostridialesFamilyXI.IncertaeSedis(100);g__Anaerococcus(100);unclassified;
ICSZ4EG01DEIDI	k__Bacteria(100);p__Proteobacteria(100);c__Betaproteobacteria(100);o__Burkholderiales(100);f__Comamonadaceae(100);g__Acidovorax(91);unclassified;
ICSZ4EG01DE7NS	k__Bacteria(100);p__Proteobacteria(100);c__Betaproteobacteria(100);o__Burkholderiales(100);unclassified;unclassified;unclassified;
ICSZ4EG01DB6UO	k__Bacteria(100);p__Proteobacteria(100);c__Betaproteobacteria(100);o__Burkholderiales(100);f__Comamonadaceae(100);g__Acidovorax(96);unclassified;
ICSZ4EG01DAGP0	k__Bacteria(100);p__Proteobacteria(100);c__Betaproteobacteria(100);o__Burkholderiales(100);f__Comamonadaceae(100);unclassified;unclassified;
ICSZ4EG01D9N6V	k__Bacteria(100);p__Bacteroidetes(100);c__Flavobacteria(100);o__Flavobacteriales(100);f__Flavobacteriaceae(100);unclassified;unclassified;
ICSZ4EG01D91MQ	k__Bacteria(100);p__Proteobacteria(100);c__Alphaproteobacteria(100);o__Sphingomonadales(100);f__Sphingomonadaceae(100);g__Sphingomonas(90);unclassified;
ICSZ4EG01D8P7O	k__Bacteria(100);p__Bacteroidetes(100);c__Flavobacteria(100);o__Flavobacteriales(100);f__Flavobacteriaceae(100);unclassified;unclassified;
ICSZ4EG01D6KVF	k__Bacteria(100);p__Bacteroidetes(100);c__Flavobacteria(100);o__Flavobacteriales(100);f__Flavobacteriaceae(100);unclassified;unclassified;
ICSZ4EG01D5OKU	k__Bacteria(100);p__Proteobacteria(100);c__Betaproteobacteria(100);o__Burkholderiales(100);f__Comamonadaceae(100);unclassified;unclassified;
ICSZ4EG01AQXM9	k__Bacteria(100);p__Proteobacteria(100);c__Betaproteobacteria(100);o__Rhodocyclales(95);f__Rhodocyclaceae(95);g__Dechloromonas(93);unclassified;
ICSZ4EG01D0ASI	k__Bacteria(100);p__Proteobacteria(100);c__Betaproteobacteria(100);o__Rhodocyclales(100);f__Rhodocyclaceae(100);g__Dechloromonas(99);unclassified;
ICSZ4EG01D07UH	k__Bacteria(100);p__Proteobacteria(100);c__Betaproteobacteria(100);o__Burkholderiales(100);f__Comamonadaceae(100);g__Acidovorax(91);unclassified;
ICSZ4EG01CZEPS	k__Bacteria(100);p__Bacteroidetes(100);c__Flavobacteria(100);o__Flavobacteriales(100);f__Flavobacteriaceae(100);unclassified;unclassified;
ICSZ4EG01CYMUC	k__Bacteria(100);p__Proteobacteria(100);c__Betaproteobacteria(100);o__Rhodocyclales(100);f__Rhodocyclaceae(100);g__Dechloromonas(100);unclassified;
ICSZ4EG01CXJNY	k__Bacteria(100);p__Proteobacteria(100);c__Betaproteobacteria(100);o__Burkholderiales(100);f__Comamonadaceae(100);g__Hylemonella(89);unclassified;
ICSZ4EG01CWKHI	k__Bacteria(100);p__Proteobacteria(100);c__Alphaproteobacteria(99);o__Sphingomonadales(99);f__Sphingomonadaceae(99);g__Sphingomonas(90);unclassified;
ICSZ4EG01CUWKK	k__Bacteria(100);p__Bacteroidetes(100);c__Flavobacteria(100);o__Flavobacteriales(100);f__Flavobacteriaceae(100);g__Chryseobacterium(95);unclassified;
ICSZ4EG01CUFLX	k__Bacteria(100);p__Bacteroidetes(100);c__Flavobacteria(100);o__Flavobacteriales(100);f__Flavobacteriaceae(100);unclassified;unclassified;
ICSZ4EG01CRL4Z	k__Bacteria(100);p__Bacteroidetes(100);c__Flavobacteria(100);o__Flavobacteriales(100);f__Flavobacteriaceae(100);unclassified;unclassified;
ICSZ4EG01CR9AT	k__Bacteria(100);p__Bacteroidetes(100);c__Flavobacteria(100);o__Flavobacteriales(100);f__Flavobacteriaceae(100);unclassified;unclassified;
ICSZ4EG01CQZFB	k__Bacteria(100);p__Proteobacteria(99);c__Betaproteobacteria(99);o__Burkholderiales(99);f__Comamonadaceae(99);unclassified;unclassified;
ICSZ4EG01COU4M	k__Bacteria(100);p__Proteobacteria(100);c__Betaproteobacteria(100);o__Burkholderiales(98);unclassified;unclassified;unclassified;
ICSZ4EG01COG9T	k__Bacteria(100);p__Bacteroidetes(100);c__Flavobacteria(100);o__Flavobacteriales(100);f__Flavobacteriaceae(100);unclassified;unclassified;
ICSZ4EG01CNUOI	k__Bacteria(100);p__Proteobacteria(100);c__Betaproteobacteria(100);o__Burkholderiales(99);unclassified;unclassified;unclassified;
ICSZ4EG01CNLQ3	k__Bacteria(100);p__Proteobacteria(100);c__Alphaproteobacteria(100);o__Sphingomonadales(100);f__Sphingomonadaceae(100);g__Sphingomonas(92);s__Caulobacterleidyi(90);
ICSZ4EG01CN92A	k__Bacteria(100);p__Proteobacteria(97);c__Betaproteobacteria(96);o__Burkholderiales(96);f__Comamonadaceae(90);unclassified;unclassified;
ICSZ4EG01CMLLK	k__Bacteria(97);unclassified;unclassified;unclassified;unclassified;unclassified;unclassified;
ICSZ4EG01CL5SW	k__Bacteria(100);p__Firmicutes(99);c__Clostridia(99);o__Clostridiales(99);f__Ruminococcaceae(99);g__Oscillospira(99);unclassified;
ICSZ4EG01CL5JF	k__Bacteria(100);p__Proteobacteria(98);c__Betaproteobacteria(98);o__Burkholderiales(96);unclassified;unclassified;unclassified;
ICSZ4EG01CKUND	k__Bacteria(100);p__Proteobacteria(100);c__Betaproteobacteria(100);o__Burkholderiales(100);f__Comamonadaceae(100);g__Acidovorax(98);unclassified;
ICSZ4EG01CJLCS	k__Bacteria(100);p__Proteobacteria(100);c__Betaproteobacteria(100);o__Burkholderiales(100);f__Comamonadaceae(100);unclassified;unclassified;
ICSZ4EG01CJ0AL	k__Bacteria(100);unclassified;unclassified;unclassified;unclassified;unclassified;unclassified;
ICSZ4EG01CIROI	k__Bacteria(100);p__Bacteroidetes(100);c__Flavobacteria(100);o__Flavobacteriales(100);f__Flavobacteriaceae(100);unclassified;unclassified;
ICSZ4EG01CINX7	k__Bacteria(100);p__Bacteroidetes(100);c__Flavobacteria(100);o__Flavobacteriales(100);f__Flavobacteriaceae(100);unclassified;unclassified;
ICSZ4EG01CEN8M	k__Bacteria(99);unclassified;unclassified;unclassified;unclassified;unclassified;unclassified;
ICSZ4EG01CCEQD	k__Bacteria(100);p__Proteobacteria(100);c__Betaproteobacteria(100);o__Burkholderiales(100);f__Comamonadaceae(100);g__Acidovorax(85);unclassified;
ICSZ4EG01C9WFK	k__Bacteria(100);p__Proteobacteria(100);c__Betaproteobacteria(100);o__Burkholderiales(100);f__Comamonadaceae(100);unclassified;unclassified;
ICSZ4EG01C9M7R	k__Bacteria(100);p__Proteobacteria(100);c__Betaproteobacteria(100);o__Burkholderiales(100);f__Comamonadaceae(100);g__Acidovorax(93);unclassified;
ICSZ4EG01C9382	k__Bacteria(99);unclassified;unclassified;unclassified;unclassified;unclassified;unclassified;
ICSZ4EG01C8P5W	k__Bacteria(100);p__Proteobacteria(100);c__Betaproteobacteria(100);o__Burkholderiales(100);f__Comamonadaceae(100);g__Acidovorax(94);s__Acidovoraxcaen(87);
ICSZ4EG01C5PEW	k__Bacteria(97);p__Proteobacteria(83);unclassified;unclassified;unclassified;unclassified;unclassified;
ICSZ4EG01BWB2E	k__Bacteria(100);p__Bacteroidetes(99);c__Flavobacteria(99);o__Flavobacteriales(99);f__Flavobacteriaceae(99);unclassified;unclassified;
ICSZ4EG02IOLIH	k__Bacteria(100);p__Proteobacteria(100);c__Betaproteobacteria(100);unclassified;unclassified;unclassified;unclassified;
ICSZ4EG01C543V	k__Bacteria(100);p__Proteobacteria(100);c__Betaproteobacteria(100);o__Burkholderiales(100);f__Comamonadaceae(100);g__Acidovorax(100);s__Acidovoraxcaen(97);
ICSZ4EG01C4SYV	k__Bacteria(100);p__Proteobacteria(99);c__Betaproteobacteria(98);o__Burkholderiales(97);unclassified;unclassified;unclassified;
ICSZ4EG01C3T3U	k__Bacteria(100);p__Bacteroidetes(100);c__Flavobacteria(100);o__Flavobacteriales(100);f__Flavobacteriaceae(100);unclassified;unclassified;
ICSZ4EG01C396X	k__Bacteria(100);p__Bacteroidetes(92);c__Bacteroidia(89);o__Bacteroidales(89);unclassified;unclassified;unclassified;
ICSZ4EG01C2MHT	k__Bacteria(100);p__Proteobacteria(100);c__Betaproteobacteria(100);o__Burkholderiales(96);unclassified;unclassified;unclassified;
ICSZ4EG01C05F2	k__Bacteria(100);p__Proteobacteria(100);c__Betaproteobacteria(100);o__Burkholderiales(96);unclassified;unclassified;unclassified;
ICSZ4EG01BZE1U	k__Bacteria(100);p__Proteobacteria(100);c__Betaproteobacteria(100);o__Burkholderiales(100);f__Comamonadaceae(100);unclassified;unclassified;
ICSZ4EG01BYWE2	k__Bacteria(100);p__Proteobacteria(99);c__Betaproteobacteria(99);o__Burkholderiales(98);unclassified;unclassified;unclassified;
ICSZ4EG01BYUB7	k__Bacteria(100);p__Proteobacteria(100);c__Alphaproteobacteria(100);o__Rhizobiales(100);f__Bradyrhizobiaceae(100);g__Bradyrhizobium(89);s__Bradyrhizobiumelkani(89);
ICSZ4EG01BXK8K	k__Bacteria(100);p__Proteobacteria(100);c__Betaproteobacteria(100);o__Burkholderiales(100);f__Comamonadaceae(100);g__Acidovorax(97);unclassified;
ICSZ4EG01BW8NM	k__Bacteria(100);p__Proteobacteria(100);c__Betaproteobacteria(100);unclassified;unclassified;unclassified;unclassified;
ICSZ4EG01BVHJ3	k__Bacteria(100);p__Bacteroidetes(100);c__Flavobacteria(100);o__Flavobacteriales(100);f__Flavobacteriaceae(100);unclassified;unclassified;
ICSZ4EG01BUH0R	k__Bacteria(100);p__Proteobacteria(100);c__Betaproteobacteria(100);o__Burkholderiales(100);f__Comamonadaceae(100);unclassified;unclassified;
ICSZ4EG01BTM6U	k__Bacteria(100);p__Proteobacteria(100);c__Betaproteobacteria(100);o__Burkholderiales(100);unclassified;unclassified;unclassified;
ICSZ4EG01BTF2O	k__Bacteria(100);p__Proteobacteria(100);c__Betaproteobacteria(100);o__Burkholderiales(100);f__Comamonadaceae(100);g__Acidovorax(92);unclassified;
ICSZ4EG01BS99A	k__Bacteria(100);p__Firmicutes(100);c__Clostridia(100);o__Clostridiales(100);f__Ruminococcaceae(100);g__Oscillospira(100);unclassified;
ICSZ4EG01BNPWK	k__Bacteria(100);p__Proteobacteria(100);c__Betaproteobacteria(100);o__Burkholderiales(98);f__Comamonadaceae(98);g__Hylemonella(97);unclassified;
ICSZ4EG01BMH6V	k__Bacteria(100);p__Proteobacteria(100);c__Betaproteobacteria(100);o__Burkholderiales(99);unclassified;unclassified;unclassified;
ICSZ4EG02JZXRQ	k__Bacteria(100);unclassified;unclassified;unclassified;unclassified;unclassified;unclassified;
ICSZ4EG01BKAFO	k__Bacteria(100);p__Proteobacteria(100);c__Betaproteobacteria(100);o__Burkholderiales(100);f__Comamonadaceae(100);g__Acidovorax(97);s__Acidovoraxcaen(90);
ICSZ4EG01BK497	k__Bacteria(100);p__Proteobacteria(100);c__Betaproteobacteria(100);o__Burkholderiales(100);f__Comamonadaceae(100);g__Acidovorax(100);s__Acidovoraxcaen(95);
ICSZ4EG01A6UA7	k__Bacteria(100);p__Proteobacteria(100);c__Betaproteobacteria(100);o__Burkholderiales(100);f__Comamonadaceae(99);unclassified;unclassified;
ICSZ4EG01BJ3Q3	k__Bacteria(100);p__Proteobacteria(100);c__Betaproteobacteria(100);o__Burkholderiales(99);f__Comamonadaceae(99);unclassified;unclassified;
ICSZ4EG01BHWZF	k__Bacteria(100);p__Proteobacteria(100);c__Betaproteobacteria(98);o__Burkholderiales(93);unclassified;unclassified;unclassified;
ICSZ4EG01BH8K1	k__Bacteria(100);p__Proteobacteria(100);c__Betaproteobacteria(100);o__Burkholderiales(100);f__Comamonadaceae(100);g__Acidovorax(89);unclassified;
ICSZ4EG01BH814	k__Bacteria(100);p__Proteobacteria(100);c__Betaproteobacteria(100);o__Burkholderiales(99);unclassified;unclassified;unclassified;
ICSZ4EG01BGWHV	k__Bacteria(100);p__Bacteroidetes(100);c__Flavobacteria(100);o__Flavobacteriales(100);f__Flavobacteriaceae(100);unclassified;unclassified;
ICSZ4EG01BGLYV	k__Bacteria(100);p__Actinobacteria(100);c__Actinobacteria(100);o__Actinomycetales(100);f__Propionibacteriaceae(100);g__Propionibacterium(100);s__Propionibacteriumacne(100);
ICSZ4EG01BFRMC	k__Bacteria(98);unclassified;unclassified;unclassified;unclassified;unclassified;unclassified;
ICSZ4EG01BEF4Z	k__Bacteria(100);p__Proteobacteria(100);c__Alphaproteobacteria(100);o__Sphingomonadales(100);f__Sphingomonadaceae(100);g__Sphingomonas(90);s__Caulobacterleidyi(86);
ICSZ4EG01ARWBP	k__Bacteria(100);p__Proteobacteria(100);c__Betaproteobacteria(100);o__Burkholderiales(96);unclassified;unclassified;unclassified;
ICSZ4EG01BAGZ6	k__Bacteria(100);p__Proteobacteria(100);c__Betaproteobacteria(100);o__Burkholderiales(99);unclassified;unclassified;unclassified;
ICSZ4EG01B6WOZ	k__Bacteria(100);p__Firmicutes(82);c__Clostridia(80);o__Clostridiales(80);unclassified;unclassified;unclassified;
ICSZ4EG01B4DYM	k__Bacteria(100);p__Proteobacteria(100);c__Betaproteobacteria(98);o__Burkholderiales(94);unclassified;unclassified;unclassified;
ICSZ4EG01B41MK	k__Bacteria(100);p__Bacteroidetes(100);c__Flavobacteria(100);o__Flavobacteriales(100);f__Flavobacteriaceae(100);unclassified;unclassified;
ICSZ4EG01B0QEP	k__Bacteria(100);p__Proteobacteria(100);c__Betaproteobacteria(100);o__Burkholderiales(100);f__Comamonadaceae(100);g__Acidovorax(87);unclassified;
ICSZ4EG01B0IU5	k__Bacteria(97);unclassified;unclassified;unclassified;unclassified;unclassified;unclassified;
ICSZ4EG01AUV52	k__Bacteria(100);p__Bacteroidetes(100);c__Flavobacteria(100);o__Flavobacteriales(100);f__Flavobacteriaceae(100);g__Chryseobacterium(85);unclassified;
ICSZ4EG01AUNQ2	k__Bacteria(100);p__Proteobacteria(100);c__Betaproteobacteria(100);o__Burkholderiales(98);unclassified;unclassified;unclassified;
ICSZ4EG01AUKE8	k__Bacteria(100);p__Proteobacteria(100);c__Betaproteobacteria(100);o__Burkholderiales(100);f__Comamonadaceae(100);unclassified;unclassified;
ICSZ4EG01AT1MY	k__Bacteria(100);p__Proteobacteria(100);c__Betaproteobacteria(100);o__Burkholderiales(100);f__Comamonadaceae(100);g__Acidovorax(97);unclassified;
ICSZ4EG01AQ4S4	k__Bacteria(100);p__Proteobacteria(100);c__Betaproteobacteria(100);o__Burkholderiales(100);f__Comamonadaceae(100);g__Acidovorax(90);unclassified;
ICSZ4EG01AP49F	k__Bacteria(100);p__Proteobacteria(100);c__Betaproteobacteria(99);o__Burkholderiales(99);f__Comamonadaceae(83);unclassified;unclassified;
ICSZ4EG01ANH87	k__Bacteria(100);p__Proteobacteria(100);c__Betaproteobacteria(100);o__Burkholderiales(100);f__Comamonadaceae(100);unclassified;unclassified;
ICSZ4EG01AN6GJ	k__Bacteria(100);p__Proteobacteria(100);c__Betaproteobacteria(100);o__Burkholderiales(100);f__Comamonadaceae(99);g__Diaphorobacter(92);unclassified;
ICSZ4EG01AMJXM	k__Bacteria(100);p__Proteobacteria(100);c__Betaproteobacteria(100);o__Burkholderiales(99);f__Comamonadaceae(90);unclassified;unclassified;
ICSZ4EG01AKD3F	k__Bacteria(98);unclassified;unclassified;unclassified;unclassified;unclassified;unclassified;
ICSZ4EG01AJ1AN	k__Bacteria(100);p__Proteobacteria(100);c__Betaproteobacteria(100);unclassified;unclassified;unclassified;unclassified;
ICSZ4EG01A8DHL	k__Bacteria(100);p__Proteobacteria(100);c__Alphaproteobacteria(100);o__Sphingomonadales(100);f__Sphingomonadaceae(100);g__Sphingomonas(95);s__Caulobacterleidyi(90);
ICSZ4EG01A7G53	k__Bacteria(100);p__Proteobacteria(99);c__Betaproteobacteria(98);o__Burkholderiales(94);unclassified;unclassified;unclassified;
ICSZ4EG01A6PQG	k__Bacteria(100);p__Proteobacteria(100);c__Betaproteobacteria(100);o__Burkholderiales(100);f__Comamonadaceae(100);g__Acidovorax(92);unclassified;
ICSZ4EG01A4K4C	k__Bacteria(100);p__Firmicutes(82);unclassified;unclassified;unclassified;unclassified;unclassified;
ICSZ4EG01A3M7F	k__Bacteria(100);p__Bacteroidetes(100);c__Flavobacteria(100);o__Flavobacteriales(100);f__Flavobacteriaceae(100);g__Chryseobacterium(92);unclassified;
ICSZ4EG01EEJ1C	k__Bacteria(100);p__Actinobacteria(100);c__Actinobacteria(100);o__Actinomycetales(100);f__Beutenbergiaceae(97);unclassified;unclassified;
ICSZ4EG01CLC82	k__Bacteria(100);p__Firmicutes(100);c__Clostridia(100);o__Clostridiales(100);f__Veillonellaceae(100);g__Veillonella(100);s__Veillonellaparvul(95);
ICSZ4EG01DS2PY	k__Bacteria(100);p__Proteobacteria(100);c__Betaproteobacteria(100);o__Burkholderiales(100);f__Comamonadaceae(100);g__Acidovorax(99);unclassified;
ICSZ4EG01EE9UK	k__Bacteria(100);p__Proteobacteria(100);c__Betaproteobacteria(100);o__Burkholderiales(97);unclassified;unclassified;unclassified;
ICSZ4EG01BFECS	k__Bacteria(100);p__Proteobacteria(100);c__Alphaproteobacteria(82);o__Sphingomonadales(82);f__Sphingomonadaceae(82);g__Sphingomonas(82);s__Caulobacterleidyi(82);
ICSZ4EG01DJICX	k__Bacteria(100);p__Proteobacteria(100);c__Betaproteobacteria(100);o__Burkholderiales(100);f__Comamonadaceae(100);g__Acidovorax(89);unclassified;
ICSZ4EG01DGFSV	k__Bacteria(100);p__Proteobacteria(100);c__Betaproteobacteria(100);o__Burkholderiales(100);f__Comamonadaceae(100);g__Variovorax(100);s__Variovoraxparadoxu(100);
ICSZ4EG01DEGZL	k__Bacteria(100);p__Proteobacteria(100);c__Alphaproteobacteria(100);o__Rhizobiales(100);f__Bradyrhizobiaceae(100);g__Rhodopseudomonas(100);unclassified;
ICSZ4EG01DB4TP	k__Bacteria(100);p__Proteobacteria(100);c__Betaproteobacteria(100);o__Rhodocyclales(95);f__Rhodocyclaceae(95);g__Dechloromonas(89);unclassified;
ICSZ4EG01C65B3	k__Bacteria(100);p__Bacteroidetes(100);c__Flavobacteria(100);o__Flavobacteriales(100);f__Flavobacteriaceae(100);unclassified;unclassified;
ICSZ4EG01EV8SW	k__Bacteria(100);p__Proteobacteria(100);c__Betaproteobacteria(100);o__Burkholderiales(100);f__Comamonadaceae(100);g__Simplicispira(97);unclassified;
ICSZ4EG01BKVOG	k__Bacteria(100);p__Proteobacteria(100);c__Alphaproteobacteria(100);o__Sphingomonadales(100);f__Sphingomonadaceae(97);g__Sphingomonas(82);unclassified;
ICSZ4EG01B8QZK	k__Bacteria(100);p__Proteobacteria(100);c__Betaproteobacteria(100);o__Burkholderiales(100);f__Comamonadaceae(100);g__Acidovorax(84);unclassified;
ICSZ4EG01B12WX	k__Bacteria(100);p__Proteobacteria(100);c__Betaproteobacteria(100);o__Burkholderiales(100);f__Comamonadaceae(100);unclassified;unclassified;
ICSZ4EG01EYZN2	k__Bacteria(100);p__Proteobacteria(100);c__Betaproteobacteria(99);o__Burkholderiales(98);unclassified;unclassified;unclassified;
ICSZ4EG01EY86H	k__Bacteria(100);p__Proteobacteria(100);c__Betaproteobacteria(100);o__Burkholderiales(100);f__Comamonadaceae(100);g__Acidovorax(94);unclassified;
ICSZ4EG01EX5EG	k__Bacteria(100);p__Proteobacteria(100);c__Betaproteobacteria(100);o__Burkholderiales(100);unclassified;unclassified;unclassified;
ICSZ4EG01ES38U	k__Bacteria(100);p__Proteobacteria(100);c__Betaproteobacteria(100);o__Burkholderiales(100);f__Comamonadaceae(100);g__Acidovorax(89);unclassified;
ICSZ4EG01ERKXQ	k__Bacteria(100);p__Bacteroidetes(100);c__Flavobacteria(100);o__Flavobacteriales(100);f__Flavobacteriaceae(100);unclassified;unclassified;
ICSZ4EG01EQIGM	k__Bacteria(100);p__Proteobacteria(100);c__Betaproteobacteria(97);o__Burkholderiales(96);unclassified;unclassified;unclassified;
ICSZ4EG01EP2IX	k__Bacteria(100);p__Proteobacteria(100);c__Betaproteobacteria(100);o__Burkholderiales(99);unclassified;unclassified;unclassified;
ICSZ4EG01EOZQT	k__Bacteria(100);p__Proteobacteria(100);c__Betaproteobacteria(100);o__Burkholderiales(100);f__Comamonadaceae(100);g__Diaphorobacter(98);unclassified;
ICSZ4EG01EMNQB	k__Bacteria(100);p__Proteobacteria(100);c__Betaproteobacteria(100);o__Burkholderiales(100);f__Comamonadaceae(100);unclassified;unclassified;
ICSZ4EG01EKLM3	k__Bacteria(100);p__Proteobacteria(97);c__Betaproteobacteria(95);o__Burkholderiales(95);unclassified;unclassified;unclassified;
ICSZ4EG01EJSU9	k__Bacteria(100);p__Bacteroidetes(100);c__Flavobacteria(100);o__Flavobacteriales(100);f__Flavobacteriaceae(100);unclassified;unclassified;
ICSZ4EG01EJ7QA	k__Bacteria(100);p__Proteobacteria(100);c__Alphaproteobacteria(100);o__Rhizobiales(100);f__Bradyrhizobiaceae(100);g__Rhodopseudomonas(96);unclassified;
ICSZ4EG01EGGLW	k__Bacteria(100);p__Proteobacteria(99);c__Betaproteobacteria(98);o__Burkholderiales(94);unclassified;unclassified;unclassified;
ICSZ4EG01EETEP	k__Bacteria(100);p__Bacteroidetes(100);c__Flavobacteria(100);o__Flavobacteriales(100);f__Flavobacteriaceae(100);unclassified;unclassified;
ICSZ4EG01EEJ9E	k__Bacteria(100);p__Proteobacteria(100);c__Betaproteobacteria(100);o__Burkholderiales(100);f__Comamonadaceae(100);g__Acidovorax(98);s__Acidovoraxcaen(96);
ICSZ4EG01EE7FK	k__Bacteria(100);p__Proteobacteria(100);c__Alphaproteobacteria(100);o__Sphingomonadales(100);f__Sphingomonadaceae(100);g__Sphingomonas(99);s__Caulobacterleidyi(99);
ICSZ4EG01EB090	k__Bacteria(100);p__Proteobacteria(100);c__Betaproteobacteria(100);o__Burkholderiales(100);f__Comamonadaceae(100);g__Acidovorax(92);unclassified;
ICSZ4EG01DUL55	k__Bacteria(100);p__Proteobacteria(100);c__Betaproteobacteria(100);o__Burkholderiales(100);f__Comamonadaceae(100);g__Diaphorobacter(100);unclassified;
ICSZ4EG01DU2I6	k__Bacteria(100);p__Proteobacteria(100);c__Betaproteobacteria(100);o__Burkholderiales(100);f__Comamonadaceae(100);g__Diaphorobacter(99);unclassified;
ICSZ4EG01DPQ7A	k__Bacteria(100);p__Proteobacteria(100);c__Betaproteobacteria(98);o__Burkholderiales(95);unclassified;unclassified;unclassified;
ICSZ4EG01DPBSS	k__Bacteria(100);p__Proteobacteria(100);c__Betaproteobacteria(100);o__Burkholderiales(100);f__Comamonadaceae(100);unclassified;unclassified;
ICSZ4EG02HR7CD	k__Bacteria(100);p__Proteobacteria(100);c__Betaproteobacteria(100);o__Burkholderiales(100);unclassified;unclassified;unclassified;
ICSZ4EG01DP0JD	k__Bacteria(100);p__Proteobacteria(100);c__Betaproteobacteria(100);o__Burkholderiales(97);f__Comamonadaceae(97);unclassified;unclassified;
ICSZ4EG01DM1SN	k__Bacteria(100);p__Firmicutes(100);c__Clostridia(100);o__Clostridiales(100);f__Ruminococcaceae(100);g__Oscillospira(100);unclassified;
ICSZ4EG01DM1LJ	k__Bacteria(100);p__Proteobacteria(100);c__Betaproteobacteria(96);o__Burkholderiales(95);unclassified;unclassified;unclassified;
ICSZ4EG01DJ6RS	k__Bacteria(99);p__Proteobacteria(99);c__Betaproteobacteria(99);o__Burkholderiales(99);unclassified;unclassified;unclassified;
ICSZ4EG01DI7NP	k__Bacteria(100);p__Bacteroidetes(100);c__Flavobacteria(100);o__Flavobacteriales(100);f__Flavobacteriaceae(100);g__Chryseobacterium(87);unclassified;
ICSZ4EG01DI0XH	k__Bacteria(100);p__Proteobacteria(100);c__Betaproteobacteria(100);o__Burkholderiales(100);f__Comamonadaceae(92);unclassified;unclassified;
ICSZ4EG01DHQS1	k__Bacteria(100);p__Proteobacteria(100);c__Betaproteobacteria(100);o__Burkholderiales(100);f__Comamonadaceae(100);unclassified;unclassified;
ICSZ4EG01DH514	k__Bacteria(100);p__Proteobacteria(100);c__Betaproteobacteria(100);o__Burkholderiales(100);unclassified;unclassified;unclassified;
ICSZ4EG01DH09O	k__Bacteria(100);p__Proteobacteria(100);c__Alphaproteobacteria(100);o__Rhizobiales(100);f__Bradyrhizobiaceae(100);g__Rhodopseudomonas(99);unclassified;
ICSZ4EG01DGH90	k__Bacteria(100);p__Proteobacteria(100);c__Betaproteobacteria(100);o__Burkholderiales(100);f__Comamonadaceae(100);g__Diaphorobacter(91);unclassified;
ICSZ4EG01DFTCI	k__Bacteria(100);p__Bacteroidetes(100);c__Flavobacteria(100);o__Flavobacteriales(100);f__Flavobacteriaceae(100);unclassified;unclassified;
ICSZ4EG01DF97M	k__Bacteria(100);p__Proteobacteria(100);c__Betaproteobacteria(100);o__Burkholderiales(100);f__Comamonadaceae(100);g__Acidovorax(95);unclassified;
ICSZ4EG01DD8HA	k__Bacteria(100);p__Proteobacteria(100);c__Betaproteobacteria(100);o__Burkholderiales(100);f__Comamonadaceae(100);g__Diaphorobacter(99);unclassified;
ICSZ4EG01DAR6E	k__Bacteria(100);p__Proteobacteria(100);c__Alphaproteobacteria(100);o__Sphingomonadales(100);f__Sphingomonadaceae(100);g__Sphingomonas(99);s__Caulobacterleidyi(99);
ICSZ4EG01CXEKF	k__Bacteria(100);p__Proteobacteria(100);c__Betaproteobacteria(100);o__Rhodocyclales(100);f__Rhodocyclaceae(100);g__Dechloromonas(99);unclassified;
ICSZ4EG01D7ZL4	k__Bacteria(100);p__Proteobacteria(100);c__Betaproteobacteria(100);o__Burkholderiales(100);f__Comamonadaceae(100);g__Acidovorax(92);unclassified;
ICSZ4EG01D7J3M	k__Bacteria(100);p__Proteobacteria(100);c__Betaproteobacteria(100);o__Burkholderiales(100);f__Comamonadaceae(100);g__Acidovorax(93);unclassified;
ICSZ4EG01D6OTC	k__Bacteria(100);p__Bacteroidetes(100);c__Flavobacteria(100);o__Flavobacteriales(100);f__Flavobacteriaceae(100);unclassified;unclassified;
ICSZ4EG01D1CHB	k__Bacteria(100);p__Bacteroidetes(100);c__Flavobacteria(100);o__Flavobacteriales(100);f__Flavobacteriaceae(100);unclassified;unclassified;
ICSZ4EG01D0J6Q	k__Bacteria(100);p__Bacteroidetes(100);c__Flavobacteria(100);o__Flavobacteriales(100);f__Flavobacteriaceae(100);unclassified;unclassified;
ICSZ4EG01CYEUN	k__Bacteria(100);p__Proteobacteria(100);c__Alphaproteobacteria(100);o__Rhizobiales(98);f__Bradyrhizobiaceae(98);g__Rhodopseudomonas(94);unclassified;
ICSZ4EG01CVBDV	k__Bacteria(100);p__Bacteroidetes(100);c__Flavobacteria(99);o__Flavobacteriales(99);f__Flavobacteriaceae(99);unclassified;unclassified;
ICSZ4EG01CSHUE	k__Bacteria(100);p__Proteobacteria(100);c__Betaproteobacteria(100);o__Burkholderiales(91);f__Comamonadaceae(91);unclassified;unclassified;
ICSZ4EG01CSAT3	k__Bacteria(100);p__Proteobacteria(100);c__Betaproteobacteria(100);o__Rhodocyclales(100);f__Rhodocyclaceae(100);g__Dechloromonas(100);unclassified;
ICSZ4EG01CRQ3Z	k__Bacteria(100);p__Firmicutes(85);c__Clostridia(83);o__Clostridiales(83);f__Lachnospiraceae(82);unclassified;unclassified;
ICSZ4EG01CN6U4	k__Bacteria(100);p__Proteobacteria(100);c__Betaproteobacteria(100);o__Burkholderiales(100);unclassified;unclassified;unclassified;
ICSZ4EG01CL2GB	k__Bacteria(100);p__Proteobacteria(100);c__Alphaproteobacteria(100);o__Rhizobiales(99);f__Bradyrhizobiaceae(98);g__Rhodopseudomonas(88);unclassified;
ICSZ4EG01CIB5X	k__Bacteria(100);p__Proteobacteria(99);c__Betaproteobacteria(97);o__Burkholderiales(96);unclassified;unclassified;unclassified;
ICSZ4EG01CEW42	k__Bacteria(100);p__Bacteroidetes(100);c__Flavobacteria(100);o__Flavobacteriales(100);f__Flavobacteriaceae(100);unclassified;unclassified;
ICSZ4EG01CDRGS	k__Bacteria(100);p__Proteobacteria(100);c__Alphaproteobacteria(100);o__Sphingomonadales(100);f__Sphingomonadaceae(98);g__Sphingomonas(89);unclassified;
ICSZ4EG01CCFDY	k__Bacteria(100);p__Proteobacteria(99);c__Betaproteobacteria(99);o__Burkholderiales(98);unclassified;unclassified;unclassified;
ICSZ4EG01CC5AR	k__Bacteria(100);p__Proteobacteria(100);c__Betaproteobacteria(99);o__Burkholderiales(98);unclassified;unclassified;unclassified;
ICSZ4EG01A46VR	k__Bacteria(100);p__Proteobacteria(100);c__Betaproteobacteria(100);o__Burkholderiales(100);f__Comamonadaceae(97);unclassified;unclassified;
ICSZ4EG01C9G7W	k__Bacteria(100);p__Proteobacteria(100);c__Betaproteobacteria(100);o__Burkholderiales(100);f__Comamonadaceae(100);g__Acidovorax(99);unclassified;
ICSZ4EG01C6CSL	k__Bacteria(100);p__Bacteroidetes(100);c__Flavobacteria(100);o__Flavobacteriales(100);f__Flavobacteriaceae(100);unclassified;unclassified;
ICSZ4EG01C4R05	k__Bacteria(100);p__Proteobacteria(100);c__Betaproteobacteria(100);o__Burkholderiales(100);f__Comamonadaceae(100);g__Acidovorax(90);unclassified;
ICSZ4EG01C4LBN	k__Bacteria(100);p__Proteobacteria(98);c__Betaproteobacteria(96);o__Burkholderiales(95);unclassified;unclassified;unclassified;
ICSZ4EG01B1FSI	k__Bacteria(100);p__Proteobacteria(100);c__Betaproteobacteria(100);o__Burkholderiales(100);f__Comamonadaceae(100);unclassified;unclassified;
ICSZ4EG01C413G	k__Bacteria(100);p__Proteobacteria(100);c__Betaproteobacteria(100);o__Burkholderiales(99);unclassified;unclassified;unclassified;
ICSZ4EG01C3NHY	k__Bacteria(100);p__Proteobacteria(100);c__Betaproteobacteria(98);o__Burkholderiales(96);unclassified;unclassified;unclassified;
ICSZ4EG01C3D02	k__Bacteria(100);p__Firmicutes(100);c__Clostridia(100);o__Clostridiales(100);f__Ruminococcaceae(100);g__Oscillospira(100);unclassified;
ICSZ4EG01BX027	k__Bacteria(100);p__Proteobacteria(100);c__Betaproteobacteria(100);o__Rhodocyclales(100);f__Rhodocyclaceae(100);g__Dechloromonas(99);unclassified;
ICSZ4EG01AN68G	k__Bacteria(100);p__Proteobacteria(100);c__Betaproteobacteria(100);o__Burkholderiales(100);f__Comamonadaceae(96);unclassified;unclassified;
ICSZ4EG01BNS9L	k__Bacteria(100);p__Bacteroidetes(100);c__Flavobacteria(100);o__Flavobacteriales(100);f__Flavobacteriaceae(100);unclassified;unclassified;
ICSZ4EG01BLG12	k__Bacteria(100);p__Proteobacteria(100);c__Betaproteobacteria(100);o__Burkholderiales(100);f__Comamonadaceae(100);unclassified;unclassified;
ICSZ4EG01BLCHX	k__Bacteria(100);p__Proteobacteria(100);c__Betaproteobacteria(100);o__Burkholderiales(100);f__Comamonadaceae(100);g__Diaphorobacter(91);unclassified;
ICSZ4EG01BHRZO	k__Bacteria(100);p__Proteobacteria(99);c__Betaproteobacteria(99);o__Burkholderiales(99);f__Comamonadaceae(86);unclassified;unclassified;
ICSZ4EG01BH8AY	k__Bacteria(100);p__Bacteroidetes(100);c__Flavobacteria(100);o__Flavobacteriales(100);f__Flavobacteriaceae(100);unclassified;unclassified;
ICSZ4EG01BEUQ8	k__Bacteria(100);p__Proteobacteria(100);c__Betaproteobacteria(100);o__Burkholderiales(98);unclassified;unclassified;unclassified;
ICSZ4EG01BCCRM	k__Bacteria(100);p__Proteobacteria(100);c__Betaproteobacteria(100);o__Burkholderiales(100);f__Comamonadaceae(100);unclassified;unclassified;
ICSZ4EG01BAUH9	k__Bacteria(100);p__Bacteroidetes(100);c__Flavobacteria(100);o__Flavobacteriales(100);f__Flavobacteriaceae(100);unclassified;unclassified;
ICSZ4EG01B8NF8	k__Bacteria(100);p__Proteobacteria(100);c__Betaproteobacteria(100);o__Burkholderiales(100);f__Comamonadaceae(100);unclassified;unclassified;
ICSZ4EG01B7Y86	k__Bacteria(100);p__Proteobacteria(100);c__Betaproteobacteria(100);o__Burkholderiales(100);f__Comamonadaceae(100);g__Acidovorax(96);unclassified;
ICSZ4EG01B7B16	k__Bacteria(100);p__Proteobacteria(100);c__Betaproteobacteria(100);o__Burkholderiales(100);f__Comamonadaceae(100);g__Acidovorax(100);unclassified;
ICSZ4EG01B52G0	k__Bacteria(100);p__Proteobacteria(100);c__Betaproteobacteria(100);o__Burkholderiales(100);f__Comamonadaceae(100);g__Acidovorax(94);unclassified;
ICSZ4EG01B0MX7	k__Bacteria(100);p__Bacteroidetes(100);c__Flavobacteria(100);o__Flavobacteriales(100);f__Flavobacteriaceae(100);unclassified;unclassified;
ICSZ4EG01AYQ77	k__Bacteria(100);p__Proteobacteria(100);c__Alphaproteobacteria(100);o__Rhizobiales(100);f__Bradyrhizobiaceae(100);g__Rhodopseudomonas(96);unclassified;
ICSZ4EG02HPB20	k__Bacteria(100);p__Proteobacteria(100);c__Betaproteobacteria(100);unclassified;unclassified;unclassified;unclassified;
ICSZ4EG01AVF8Q	k__Bacteria(100);p__Proteobacteria(100);c__Betaproteobacteria(100);o__Burkholderiales(100);f__Comamonadaceae(100);g__Acidovorax(96);unclassified;
ICSZ4EG01APZ64	k__Bacteria(100);p__Proteobacteria(100);c__Betaproteobacteria(100);o__Burkholderiales(100);f__Comamonadaceae(86);unclassified;unclassified;
ICSZ4EG01APQZ3	k__Bacteria(100);p__Proteobacteria(100);c__Alphaproteobacteria(100);o__Rhizobiales(100);f__Bradyrhizobiaceae(98);g__Rhodopseudomonas(87);unclassified;
ICSZ4EG01AOSL2	k__Bacteria(100);p__Proteobacteria(100);c__Betaproteobacteria(100);o__Burkholderiales(98);unclassified;unclassified;unclassified;
ICSZ4EG01ANKAC	k__Bacteria(100);p__Proteobacteria(100);c__Betaproteobacteria(99);o__Burkholderiales(99);f__Comamonadaceae(99);unclassified;unclassified;
ICSZ4EG02FYJYU	k__Bacteria(100);p__Proteobacteria(100);c__Betaproteobacteria(100);o__Rhodocyclales(98);f__Rhodocyclaceae(98);g__Dechloromonas(96);unclassified;
ICSZ4EG01AH3X4	k__Bacteria(100);p__Proteobacteria(100);c__Betaproteobacteria(100);o__Burkholderiales(100);f__Comamonadaceae(100);g__Acidovorax(81);unclassified;
ICSZ4EG01AGGZM	k__Bacteria(100);p__Proteobacteria(98);c__Betaproteobacteria(97);o__Burkholderiales(94);unclassified;unclassified;unclassified;
ICSZ4EG01AFG0C	k__Bacteria(100);p__Proteobacteria(99);c__Betaproteobacteria(98);o__Burkholderiales(97);unclassified;unclassified;unclassified;
ICSZ4EG01AF4MV	k__Bacteria(100);p__Proteobacteria(100);c__Betaproteobacteria(100);o__Burkholderiales(100);f__Comamonadaceae(100);g__Acidovorax(99);s__Acidovoraxcaen(89);
ICSZ4EG01AE1H2	k__Bacteria(100);p__Bacteroidetes(100);c__Flavobacteria(100);o__Flavobacteriales(100);f__Flavobacteriaceae(100);unclassified;unclassified;
ICSZ4EG01ADGDT	k__Bacteria(100);p__Proteobacteria(100);c__Betaproteobacteria(100);o__Rhodocyclales(99);f__Rhodocyclaceae(99);g__Dechloromonas(97);unclassified;
ICSZ4EG01A9H27	k__Bacteria(100);p__Proteobacteria(100);c__Betaproteobacteria(100);o__Burkholderiales(100);f__Comamonadaceae(100);unclassified;unclassified;
ICSZ4EG01A8CD0	k__Bacteria(100);p__Proteobacteria(100);c__Betaproteobacteria(100);o__Burkholderiales(96);unclassified;unclassified;unclassified;
ICSZ4EG01A4PQY	k__Bacteria(100);p__Proteobacteria(99);c__Betaproteobacteria(99);o__Burkholderiales(98);unclassified;unclassified;unclassified;
ICSZ4EG01A4O2A	k__Bacteria(100);p__Proteobacteria(100);c__Betaproteobacteria(100);o__Burkholderiales(100);f__Comamonadaceae(100);g__Acidovorax(98);unclassified;
ICSZ4EG01A2D4E	k__Bacteria(100);p__Proteobacteria(100);c__Betaproteobacteria(100);o__Rhodocyclales(100);f__Rhodocyclaceae(100);g__Dechloromonas(100);unclassified;
ICSZ4EG01A24KL	k__Bacteria(100);p__Proteobacteria(100);c__Betaproteobacteria(100);o__Burkholderiales(100);f__Comamonadaceae(100);g__Acidovorax(85);unclassified;
ICSZ4EG01EVQ70	k__Bacteria(100);p__Proteobacteria(100);c__Gammaproteobacteria(100);o__Chromatiales(97);f__Sinobacteraceae(97);unclassified;unclassified;
ICSZ4EG01EM577	k__Bacteria(100);p__Actinobacteria(100);c__Actinobacteria(100);o__Actinomycetales(100);f__Micrococcaceae(100);g__Arthrobacter(99);unclassified;
ICSZ4EG01BWMB6	k__Bacteria(100);p__Firmicutes(90);c__Clostridia(90);o__Clostridiales(90);f__Lachnospiraceae(87);unclassified;unclassified;
ICSZ4EG01ESGJB	k__Bacteria(100);p__Proteobacteria(100);c__Betaproteobacteria(100);o__Burkholderiales(100);f__Comamonadaceae(100);g__Acidovorax(99);unclassified;
ICSZ4EG01A9PD7	k__Bacteria(100);p__Proteobacteria(100);c__Betaproteobacteria(100);o__Burkholderiales(100);f__Comamonadaceae(100);unclassified;unclassified;
ICSZ4EG01ES7RY	k__Bacteria(100);p__Proteobacteria(100);c__Betaproteobacteria(100);o__Burkholderiales(97);f__Comamonadaceae(96);unclassified;unclassified;
ICSZ4EG01ET0SS	k__Bacteria(100);p__Proteobacteria(100);c__Betaproteobacteria(100);o__Burkholderiales(98);unclassified;unclassified;unclassified;
ICSZ4EG01DSPPE	k__Bacteria(100);p__Firmicutes(100);c__Bacilli(100);o__Bacillales(100);f__Bacillaceae(100);g__Bacillus(100);s__Bacillusasahi(100);
ICSZ4EG01AG7F4	k__Bacteria(100);p__Proteobacteria(100);c__Betaproteobacteria(100);o__Burkholderiales(100);f__Comamonadaceae(100);g__Acidovorax(94);unclassified;
ICSZ4EG01DAYBA	k__Bacteria(98);p__Bacteroidetes(91);c__Bacteroidia(87);o__Bacteroidales(87);unclassified;unclassified;unclassified;
ICSZ4EG01BQ9JR	k__Bacteria(100);p__Proteobacteria(100);unclassified;unclassified;unclassified;unclassified;unclassified;
ICSZ4EG01BB4YI	k__Bacteria(100);p__Proteobacteria(100);c__Betaproteobacteria(100);o__Burkholderiales(100);f__Comamonadaceae(87);unclassified;unclassified;
ICSZ4EG01C9TY5	k__Bacteria(100);p__Proteobacteria(100);c__Betaproteobacteria(100);o__Burkholderiales(99);f__Comamonadaceae(90);g__Acidovorax(80);unclassified;
ICSZ4EG01DCYSE	k__Bacteria(100);p__Proteobacteria(100);c__Betaproteobacteria(100);o__Rhodocyclales(100);f__Rhodocyclaceae(100);g__Dechloromonas(99);unclassified;
ICSZ4EG01A46FW	k__Bacteria(100);p__Proteobacteria(100);c__Betaproteobacteria(100);o__Burkholderiales(100);unclassified;unclassified;unclassified;
ICSZ4EG01C6WXY	k__Bacteria(100);p__Proteobacteria(99);c__Betaproteobacteria(98);o__Burkholderiales(98);unclassified;unclassified;unclassified;
ICSZ4EG01EVRVL	k__Bacteria(100);p__Proteobacteria(100);unclassified;unclassified;unclassified;unclassified;unclassified;
ICSZ4EG01EUU46	k__Bacteria(100);p__Proteobacteria(100);c__Betaproteobacteria(100);o__Burkholderiales(100);f__Comamonadaceae(95);unclassified;unclassified;
ICSZ4EG01BIRDN	k__Bacteria(100);p__Proteobacteria(100);c__Betaproteobacteria(100);o__Burkholderiales(100);f__Comamonadaceae(100);g__Acidovorax(89);unclassified;
ICSZ4EG01EYM7Q	k__Bacteria(100);p__Proteobacteria(100);c__Betaproteobacteria(100);o__Burkholderiales(100);f__Comamonadaceae(99);unclassified;unclassified;
ICSZ4EG01EYBXW	k__Bacteria(100);p__Proteobacteria(100);c__Betaproteobacteria(100);o__Burkholderiales(100);f__Comamonadaceae(100);g__Acidovorax(95);unclassified;
ICSZ4EG01EXU3P	k__Bacteria(100);p__Proteobacteria(100);c__Betaproteobacteria(100);o__Burkholderiales(100);f__Comamonadaceae(100);g__Acidovorax(81);unclassified;
ICSZ4EG01EWFLU	k__Bacteria(100);p__Proteobacteria(100);c__Betaproteobacteria(100);o__Burkholderiales(100);f__Comamonadaceae(100);g__Acidovorax(93);unclassified;
ICSZ4EG01ERYFR	k__Bacteria(100);p__Proteobacteria(98);c__Betaproteobacteria(98);o__Burkholderiales(96);unclassified;unclassified;unclassified;
ICSZ4EG01ERZAN	k__Bacteria(100);p__Bacteroidetes(100);c__Flavobacteria(100);o__Flavobacteriales(100);f__Flavobacteriaceae(100);unclassified;unclassified;
ICSZ4EG01ERAP9	k__Bacteria(100);p__Bacteroidetes(100);c__Flavobacteria(100);o__Flavobacteriales(100);f__Flavobacteriaceae(100);unclassified;unclassified;
ICSZ4EG01EQSPN	k__Bacteria(100);p__Bacteroidetes(100);c__Flavobacteria(100);o__Flavobacteriales(100);f__Flavobacteriaceae(100);unclassified;unclassified;
ICSZ4EG01EQ31F	k__Bacteria(100);p__Proteobacteria(100);c__Betaproteobacteria(100);o__Burkholderiales(100);f__Comamonadaceae(100);g__Acidovorax(85);unclassified;
ICSZ4EG01EP4KZ	k__Bacteria(100);p__Proteobacteria(100);c__Betaproteobacteria(100);o__Burkholderiales(100);f__Comamonadaceae(100);g__Acidovorax(86);unclassified;
ICSZ4EG01ENSUQ	k__Bacteria(100);p__Proteobacteria(99);c__Betaproteobacteria(99);o__Burkholderiales(99);unclassified;unclassified;unclassified;
ICSZ4EG01EN6FI	k__Bacteria(100);p__Actinobacteria(100);c__Actinobacteria(100);o__Actinomycetales(100);f__Micrococcaceae(100);g__Arthrobacter(99);unclassified;
ICSZ4EG02FP0IL	k__Bacteria(100);p__Proteobacteria(100);c__Betaproteobacteria(100);o__Burkholderiales(100);f__Comamonadaceae(99);g__Acidovorax(91);unclassified;
ICSZ4EG01EKERX	k__Bacteria(100);p__Proteobacteria(100);c__Betaproteobacteria(100);o__Burkholderiales(100);f__Comamonadaceae(100);g__Acidovorax(100);s__Acidovoraxcaen(96);
ICSZ4EG01EHCOR	k__Bacteria(100);p__Proteobacteria(100);c__Betaproteobacteria(100);o__Burkholderiales(100);f__Comamonadaceae(100);unclassified;unclassified;
ICSZ4EG01EESGB	k__Bacteria(100);p__Proteobacteria(100);c__Betaproteobacteria(100);o__Burkholderiales(97);unclassified;unclassified;unclassified;
ICSZ4EG01EABT3	k__Bacteria(100);p__Proteobacteria(100);c__Betaproteobacteria(100);o__Burkholderiales(100);f__Comamonadaceae(100);g__Acidovorax(95);unclassified;
ICSZ4EG01DYL2S	k__Bacteria(100);p__Proteobacteria(98);c__Betaproteobacteria(95);o__Burkholderiales(94);f__Comamonadaceae(85);unclassified;unclassified;
ICSZ4EG01DYJK8	k__Bacteria(100);p__Proteobacteria(100);c__Betaproteobacteria(100);o__Burkholderiales(100);f__Comamonadaceae(100);g__Acidovorax(83);unclassified;
ICSZ4EG01BYUM0	k__Bacteria(100);p__Proteobacteria(100);c__Betaproteobacteria(100);o__Burkholderiales(96);unclassified;unclassified;unclassified;
ICSZ4EG01DVBBO	k__Bacteria(100);p__Proteobacteria(100);c__Betaproteobacteria(100);o__Rhodocyclales(99);f__Rhodocyclaceae(99);g__Dechloromonas(91);unclassified;
ICSZ4EG01DU3SA	k__Bacteria(100);p__Bacteroidetes(100);c__Flavobacteria(100);o__Flavobacteriales(100);f__Flavobacteriaceae(100);unclassified;unclassified;
ICSZ4EG01DTQ8I	k__Bacteria(100);p__Proteobacteria(100);c__Betaproteobacteria(100);o__Burkholderiales(100);f__Comamonadaceae(98);unclassified;unclassified;
ICSZ4EG01DTK4U	k__Bacteria(100);p__Proteobacteria(99);c__Betaproteobacteria(99);o__Burkholderiales(98);unclassified;unclassified;unclassified;
ICSZ4EG01DSON3	k__Bacteria(100);p__Proteobacteria(100);c__Betaproteobacteria(99);o__Burkholderiales(98);unclassified;unclassified;unclassified;
ICSZ4EG01DSH59	k__Bacteria(100);p__Proteobacteria(99);c__Betaproteobacteria(98);o__Burkholderiales(96);unclassified;unclassified;unclassified;
ICSZ4EG01DRGC0	k__Bacteria(100);p__Proteobacteria(99);c__Betaproteobacteria(97);o__Burkholderiales(91);unclassified;unclassified;unclassified;
ICSZ4EG01DR10Y	k__Bacteria(100);p__Proteobacteria(100);c__Betaproteobacteria(100);o__Rhodocyclales(98);f__Rhodocyclaceae(98);g__Dechloromonas(98);unclassified;
ICSZ4EG01DQ717	k__Bacteria(100);p__Proteobacteria(100);c__Betaproteobacteria(99);o__Burkholderiales(95);unclassified;unclassified;unclassified;
ICSZ4EG01DOICR	k__Bacteria(100);p__Proteobacteria(100);c__Betaproteobacteria(100);o__Burkholderiales(96);unclassified;unclassified;unclassified;
ICSZ4EG01DLFHK	k__Bacteria(100);p__Proteobacteria(100);c__Betaproteobacteria(100);o__Burkholderiales(100);f__Comamonadaceae(100);g__Acidovorax(96);unclassified;
ICSZ4EG01DL7XZ	k__Bacteria(100);p__Proteobacteria(100);c__Betaproteobacteria(100);o__Burkholderiales(100);f__Comamonadaceae(100);g__Acidovorax(92);unclassified;
ICSZ4EG01DI0LA	k__Bacteria(100);p__Bacteroidetes(100);c__Flavobacteria(100);o__Flavobacteriales(100);f__Flavobacteriaceae(100);unclassified;unclassified;
ICSZ4EG01DHUKN	k__Bacteria(100);p__Proteobacteria(100);c__Betaproteobacteria(100);o__Burkholderiales(100);f__Comamonadaceae(94);unclassified;unclassified;
ICSZ4EG01DHOCL	k__Bacteria(100);p__Proteobacteria(100);c__Betaproteobacteria(100);o__Burkholderiales(100);f__Comamonadaceae(97);unclassified;unclassified;
ICSZ4EG01BGGTY	k__Bacteria(100);p__Proteobacteria(100);c__Betaproteobacteria(100);o__Burkholderiales(96);unclassified;unclassified;unclassified;
ICSZ4EG01DF1RD	k__Bacteria(100);p__Bacteroidetes(100);c__Flavobacteria(100);o__Flavobacteriales(100);f__Flavobacteriaceae(100);unclassified;unclassified;
ICSZ4EG01DDVZD	k__Bacteria(100);p__Proteobacteria(100);c__Betaproteobacteria(100);o__Burkholderiales(99);unclassified;unclassified;unclassified;
ICSZ4EG01DDHOW	k__Bacteria(100);p__Proteobacteria(100);c__Betaproteobacteria(100);o__Burkholderiales(100);f__Comamonadaceae(99);g__Acidovorax(90);unclassified;
ICSZ4EG01DC8JP	k__Bacteria(100);p__Proteobacteria(100);c__Betaproteobacteria(100);o__Burkholderiales(100);f__Comamonadaceae(100);unclassified;unclassified;
ICSZ4EG01DBE5J	k__Bacteria(100);p__Proteobacteria(100);c__Betaproteobacteria(99);o__Burkholderiales(98);unclassified;unclassified;unclassified;
ICSZ4EG01DAP8T	k__Bacteria(100);p__Proteobacteria(100);c__Betaproteobacteria(99);o__Burkholderiales(98);unclassified;unclassified;unclassified;
ICSZ4EG01D936M	k__Bacteria(100);p__Proteobacteria(100);c__Gammaproteobacteria(100);o__Pseudomonadales(100);f__Moraxellaceae(100);g__Enhydrobacter(100);s__Enhydrobacteraerosaccu(100);
ICSZ4EG01D8Q8M	k__Bacteria(100);p__Bacteroidetes(100);c__Flavobacteria(100);o__Flavobacteriales(100);f__Flavobacteriaceae(100);unclassified;unclassified;
ICSZ4EG01D7Z7K	k__Bacteria(100);p__Proteobacteria(100);c__Betaproteobacteria(100);o__Burkholderiales(100);f__Comamonadaceae(100);g__Acidovorax(92);unclassified;
ICSZ4EG01D67EZ	k__Bacteria(100);p__Proteobacteria(100);c__Betaproteobacteria(100);o__Burkholderiales(100);unclassified;unclassified;unclassified;
ICSZ4EG01D6265	k__Bacteria(93);unclassified;unclassified;unclassified;unclassified;unclassified;unclassified;
ICSZ4EG01D3I2M	k__Bacteria(100);p__Proteobacteria(100);c__Alphaproteobacteria(100);o__Rhizobiales(100);f__Bradyrhizobiaceae(100);unclassified;unclassified;
ICSZ4EG01D32RG	k__Bacteria(100);p__Proteobacteria(100);c__Betaproteobacteria(100);o__Burkholderiales(100);f__Comamonadaceae(100);unclassified;unclassified;
ICSZ4EG01D2QI1	k__Bacteria(100);p__Bacteroidetes(100);c__Flavobacteria(100);o__Flavobacteriales(100);f__Flavobacteriaceae(100);unclassified;unclassified;
ICSZ4EG01D1CH4	k__Bacteria(100);p__Bacteroidetes(100);c__Flavobacteria(100);o__Flavobacteriales(100);f__Flavobacteriaceae(100);unclassified;unclassified;
ICSZ4EG01D1BGL	k__Bacteria(100);p__Proteobacteria(100);c__Betaproteobacteria(100);o__Burkholderiales(99);f__Comamonadaceae(85);unclassified;unclassified;
ICSZ4EG01CZJWU	k__Bacteria(100);p__Proteobacteria(99);c__Betaproteobacteria(99);o__Burkholderiales(94);unclassified;unclassified;unclassified;
ICSZ4EG01CXKPO	k__Bacteria(100);p__Proteobacteria(100);c__Betaproteobacteria(100);o__Burkholderiales(100);f__Comamonadaceae(100);g__Acidovorax(98);unclassified;
ICSZ4EG01CV4JT	k__Bacteria(100);p__Proteobacteria(100);c__Betaproteobacteria(100);o__Burkholderiales(100);f__Comamonadaceae(100);unclassified;unclassified;
ICSZ4EG01CUVWW	k__Bacteria(100);p__Proteobacteria(100);c__Betaproteobacteria(100);o__Burkholderiales(97);unclassified;unclassified;unclassified;
ICSZ4EG01CUGCY	k__Bacteria(100);p__Bacteroidetes(100);c__Flavobacteria(100);o__Flavobacteriales(100);f__Flavobacteriaceae(100);unclassified;unclassified;
ICSZ4EG01CT513	k__Bacteria(100);p__Proteobacteria(100);c__Betaproteobacteria(99);o__Burkholderiales(99);unclassified;unclassified;unclassified;
ICSZ4EG01CT1RS	k__Bacteria(100);p__Proteobacteria(100);c__Betaproteobacteria(100);o__Burkholderiales(100);f__Comamonadaceae(100);g__Acidovorax(81);unclassified;
ICSZ4EG01CRFJZ	k__Bacteria(100);p__Proteobacteria(100);c__Betaproteobacteria(100);o__Burkholderiales(100);f__Comamonadaceae(100);g__Acidovorax(98);unclassified;
ICSZ4EG01CMYGS	k__Bacteria(100);p__Proteobacteria(100);c__Betaproteobacteria(100);o__Burkholderiales(100);f__Comamonadaceae(93);unclassified;unclassified;
ICSZ4EG01CM3NF	k__Bacteria(100);p__Proteobacteria(100);c__Betaproteobacteria(100);o__Burkholderiales(100);f__Comamonadaceae(100);unclassified;unclassified;
ICSZ4EG01CL1RY	k__Bacteria(100);p__Proteobacteria(100);c__Betaproteobacteria(99);o__Burkholderiales(97);unclassified;unclassified;unclassified;
ICSZ4EG01CIYDX	k__Bacteria(100);p__Proteobacteria(100);c__Betaproteobacteria(100);o__Burkholderiales(100);f__Comamonadaceae(100);unclassified;unclassified;
ICSZ4EG01CDM56	k__Bacteria(100);p__Proteobacteria(100);c__Betaproteobacteria(100);o__Burkholderiales(100);f__Comamonadaceae(100);unclassified;unclassified;
ICSZ4EG01CDJPV	k__Bacteria(100);unclassified;unclassified;unclassified;unclassified;unclassified;unclassified;
ICSZ4EG01CA627	k__Bacteria(100);p__Proteobacteria(100);c__Betaproteobacteria(100);o__Burkholderiales(100);f__Comamonadaceae(100);g__Pelomonas(99);unclassified;
ICSZ4EG01CA46Z	k__Bacteria(100);p__Proteobacteria(98);c__Gammaproteobacteria(94);unclassified;unclassified;unclassified;unclassified;
ICSZ4EG01C78HC	k__Bacteria(100);p__Proteobacteria(100);c__Betaproteobacteria(98);o__Burkholderiales(96);f__Comamonadaceae(83);unclassified;unclassified;
ICSZ4EG01C727V	k__Bacteria(100);p__Proteobacteria(100);c__Betaproteobacteria(100);o__Rhodocyclales(98);f__Rhodocyclaceae(98);g__Dechloromonas(84);unclassified;
ICSZ4EG01C6L8F	k__Bacteria(100);p__Proteobacteria(99);c__Betaproteobacteria(97);o__Burkholderiales(94);unclassified;unclassified;unclassified;
ICSZ4EG01C6GBC	k__Bacteria(100);p__Proteobacteria(100);c__Betaproteobacteria(99);o__Burkholderiales(98);unclassified;unclassified;unclassified;
ICSZ4EG01C5K19	k__Bacteria(100);p__Proteobacteria(99);c__Gammaproteobacteria(97);o__Chromatiales(89);f__Sinobacteraceae(84);unclassified;unclassified;
ICSZ4EG01C43Z1	k__Bacteria(100);p__Bacteroidetes(100);c__Flavobacteria(100);o__Flavobacteriales(100);f__Flavobacteriaceae(100);unclassified;unclassified;
ICSZ4EG01C3MVB	k__Bacteria(100);p__Proteobacteria(100);c__Betaproteobacteria(100);o__Burkholderiales(100);f__Comamonadaceae(100);g__Acidovorax(93);unclassified;
ICSZ4EG01BY7O5	k__Bacteria(100);p__Proteobacteria(100);c__Betaproteobacteria(100);o__Rhodocyclales(91);f__Rhodocyclaceae(91);unclassified;unclassified;
ICSZ4EG01BXG5X	k__Bacteria(100);p__Proteobacteria(100);c__Betaproteobacteria(100);o__Burkholderiales(100);f__Comamonadaceae(100);g__Acidovorax(100);s__Acidovoraxcaen(97);
ICSZ4EG01BWO4T	k__Bacteria(100);p__Proteobacteria(100);c__Betaproteobacteria(100);o__Burkholderiales(99);unclassified;unclassified;unclassified;
ICSZ4EG01BVJX6	k__Bacteria(100);p__Bacteroidetes(100);c__Flavobacteria(100);o__Flavobacteriales(100);f__Flavobacteriaceae(100);g__Chryseobacterium(86);unclassified;
ICSZ4EG01BTYYZ	k__Bacteria(100);p__Proteobacteria(100);c__Betaproteobacteria(100);o__Burkholderiales(100);unclassified;unclassified;unclassified;
ICSZ4EG01BSTRJ	k__Bacteria(100);p__Proteobacteria(100);c__Betaproteobacteria(99);o__Burkholderiales(98);f__Comamonadaceae(86);unclassified;unclassified;
ICSZ4EG01BOSPJ	k__Bacteria(100);p__Proteobacteria(100);c__Betaproteobacteria(100);o__Burkholderiales(100);f__Comamonadaceae(100);g__Acidovorax(96);s__Acidovoraxcaen(92);
ICSZ4EG01BNBNL	k__Bacteria(100);p__Proteobacteria(100);c__Betaproteobacteria(96);o__Burkholderiales(96);unclassified;unclassified;unclassified;
ICSZ4EG01BLLPB	k__Bacteria(100);p__Actinobacteria(100);c__Actinobacteria(100);o__Actinomycetales(100);f__Micrococcaceae(100);g__Arthrobacter(99);unclassified;
ICSZ4EG01BLC31	k__Bacteria(100);p__Proteobacteria(100);c__Betaproteobacteria(100);o__Burkholderiales(100);f__Comamonadaceae(99);g__Acidovorax(89);unclassified;
ICSZ4EG01BKU9S	k__Bacteria(100);p__Firmicutes(86);c__Clostridia(85);o__Clostridiales(85);f__Lachnospiraceae(85);unclassified;unclassified;
ICSZ4EG01BJFHU	k__Bacteria(100);p__Proteobacteria(100);c__Betaproteobacteria(97);o__Burkholderiales(86);unclassified;unclassified;unclassified;
ICSZ4EG01BGGQV	k__Bacteria(100);p__Bacteroidetes(100);c__Flavobacteria(100);o__Flavobacteriales(100);f__Flavobacteriaceae(100);unclassified;unclassified;
ICSZ4EG01BEY3V	k__Bacteria(100);p__Proteobacteria(100);c__Betaproteobacteria(99);o__Burkholderiales(98);unclassified;unclassified;unclassified;
ICSZ4EG01BEPB9	k__Bacteria(100);p__Proteobacteria(100);c__Betaproteobacteria(100);o__Burkholderiales(100);f__Comamonadaceae(100);g__Acidovorax(84);unclassified;
ICSZ4EG01BBIV8	k__Bacteria(100);p__Proteobacteria(100);c__Betaproteobacteria(100);o__Burkholderiales(99);f__Comamonadaceae(88);unclassified;unclassified;
ICSZ4EG01BAGUZ	k__Bacteria(100);p__Proteobacteria(100);c__Betaproteobacteria(100);o__Burkholderiales(100);f__Comamonadaceae(100);unclassified;unclassified;
ICSZ4EG01B8YPH	k__Bacteria(100);p__Proteobacteria(100);c__Betaproteobacteria(100);o__Burkholderiales(97);f__Comamonadaceae(97);g__Acidovorax(80);unclassified;
ICSZ4EG01B8OMT	k__Bacteria(100);unclassified;unclassified;unclassified;unclassified;unclassified;unclassified;
ICSZ4EG01B7VMW	k__Bacteria(100);p__Proteobacteria(100);c__Betaproteobacteria(100);o__Burkholderiales(100);f__Comamonadaceae(100);g__Acidovorax(88);unclassified;
ICSZ4EG01B6CNP	k__Bacteria(100);p__Proteobacteria(99);c__Betaproteobacteria(96);o__Burkholderiales(93);unclassified;unclassified;unclassified;
ICSZ4EG01B68A1	k__Bacteria(100);p__Proteobacteria(100);c__Betaproteobacteria(98);o__Burkholderiales(96);unclassified;unclassified;unclassified;
ICSZ4EG01B2VRF	k__Bacteria(100);p__Proteobacteria(100);c__Betaproteobacteria(100);o__Burkholderiales(96);unclassified;unclassified;unclassified;
ICSZ4EG01AZKZU	k__Bacteria(100);p__Proteobacteria(100);c__Betaproteobacteria(99);o__Burkholderiales(99);unclassified;unclassified;unclassified;
ICSZ4EG01AYO2X	k__Bacteria(100);p__Bacteroidetes(100);c__Flavobacteria(100);o__Flavobacteriales(100);f__Flavobacteriaceae(100);unclassified;unclassified;
ICSZ4EG01AWB17	k__Bacteria(100);p__Proteobacteria(99);c__Betaproteobacteria(99);o__Burkholderiales(99);unclassified;unclassified;unclassified;
ICSZ4EG01AUS6N	k__Bacteria(100);p__Proteobacteria(100);c__Betaproteobacteria(97);o__Burkholderiales(94);unclassified;unclassified;unclassified;
ICSZ4EG01AUMAA	k__Bacteria(100);p__Bacteroidetes(100);c__Flavobacteria(100);o__Flavobacteriales(100);f__Flavobacteriaceae(100);unclassified;unclassified;
ICSZ4EG01ATBG8	k__Bacteria(100);p__Proteobacteria(100);c__Betaproteobacteria(98);o__Burkholderiales(96);unclassified;unclassified;unclassified;
ICSZ4EG01AS6T6	k__Bacteria(100);p__Proteobacteria(100);c__Betaproteobacteria(100);o__Burkholderiales(100);f__Comamonadaceae(100);g__Acidovorax(93);unclassified;
ICSZ4EG01AP7Y6	k__Bacteria(100);p__Proteobacteria(100);c__Betaproteobacteria(99);o__Burkholderiales(98);unclassified;unclassified;unclassified;
ICSZ4EG01AP1BT	k__Bacteria(100);p__Proteobacteria(100);c__Betaproteobacteria(100);o__Burkholderiales(100);f__Comamonadaceae(100);unclassified;unclassified;
ICSZ4EG01ANJPA	k__Bacteria(100);p__Proteobacteria(100);c__Betaproteobacteria(100);o__Burkholderiales(91);f__Comamonadaceae(90);unclassified;unclassified;
ICSZ4EG01AKBMF	k__Bacteria(100);p__Proteobacteria(99);c__Betaproteobacteria(99);o__Burkholderiales(93);unclassified;unclassified;unclassified;
ICSZ4EG01AIZJC	k__Bacteria(100);p__Proteobacteria(100);c__Betaproteobacteria(100);o__Burkholderiales(100);f__Comamonadaceae(100);unclassified;unclassified;
ICSZ4EG01AER13	k__Bacteria(100);p__Proteobacteria(100);c__Betaproteobacteria(100);o__Rhodocyclales(100);f__Rhodocyclaceae(100);g__Dechloromonas(100);unclassified;
ICSZ4EG01A9ZI8	k__Bacteria(100);p__Proteobacteria(100);c__Betaproteobacteria(100);o__Burkholderiales(100);f__Comamonadaceae(100);g__Acidovorax(87);unclassified;
ICSZ4EG01A4X3G	k__Bacteria(100);p__Proteobacteria(100);c__Alphaproteobacteria(100);o__Rhizobiales(100);f__Phyllobacteriaceae(94);unclassified;unclassified;
ICSZ4EG01A4O14	k__Bacteria(100);p__Proteobacteria(100);c__Betaproteobacteria(100);o__Burkholderiales(98);unclassified;unclassified;unclassified;
ICSZ4EG01A4M3C	k__Bacteria(100);p__Proteobacteria(100);c__Betaproteobacteria(100);o__Burkholderiales(100);f__Comamonadaceae(100);g__Acidovorax(87);unclassified;
ICSZ4EG01A3JE2	k__Bacteria(100);p__Proteobacteria(100);c__Betaproteobacteria(100);o__Burkholderiales(100);f__Comamonadaceae(100);g__Acidovorax(93);unclassified;
ICSZ4EG01A2XRN	k__Bacteria(100);p__Bacteroidetes(100);c__Flavobacteria(100);o__Flavobacteriales(100);f__Flavobacteriaceae(100);unclassified;unclassified;
ICSZ4EG01A13R3	k__Bacteria(100);p__Proteobacteria(100);c__Betaproteobacteria(100);o__Burkholderiales(99);f__Comamonadaceae(99);unclassified;unclassified;
ICSZ4EG01BW5ZN	k__Bacteria(100);p__Firmicutes(100);c__Bacilli(100);o__Bacillales(100);f__Staphylococcaceae(100);g__Staphylococcus(100);s__Staphylococcusepidermidi(100);
ICSZ4EG01CNRT8	k__Bacteria(100);p__Actinobacteria(100);c__Actinobacteria(100);o__Actinomycetales(100);f__Microbacteriaceae(100);g__Frigoribacterium(99);unclassified;
ICSZ4EG01BIBAN	k__Bacteria(100);p__Proteobacteria(100);c__Betaproteobacteria(100);o__Burkholderiales(100);f__Comamonadaceae(100);g__Acidovorax(91);unclassified;
ICSZ4EG01D67FY	k__Bacteria(100);p__Proteobacteria(100);c__Alphaproteobacteria(100);o__Sphingomonadales(100);f__Sphingomonadaceae(100);g__Sphingomonas(99);s__Caulobacterleidyi(99);
ICSZ4EG01CX9Z9	k__Bacteria(100);p__Proteobacteria(100);c__Betaproteobacteria(100);o__Burkholderiales(100);f__Comamonadaceae(100);g__Acidovorax(90);unclassified;
ICSZ4EG01BCKG9	k__Bacteria(100);p__Proteobacteria(100);c__Alphaproteobacteria(100);o__Rhizobiales(100);f__Bradyrhizobiaceae(100);g__Afipia(100);s__Afipiagenosp.(100);
ICSZ4EG01ANTWS	k__Bacteria(100);p__Proteobacteria(94);c__Alphaproteobacteria(94);o__Rhizobiales(87);unclassified;unclassified;unclassified;
ICSZ4EG01ENQOA	k__Bacteria(100);p__Bacteroidetes(100);c__Flavobacteria(100);o__Flavobacteriales(100);f__Flavobacteriaceae(100);unclassified;unclassified;
ICSZ4EG01DZD9A	k__Bacteria(100);p__Proteobacteria(100);c__Betaproteobacteria(100);o__Burkholderiales(98);unclassified;unclassified;unclassified;
ICSZ4EG01DM25U	k__Bacteria(100);p__Proteobacteria(100);c__Betaproteobacteria(100);o__Burkholderiales(100);f__Comamonadaceae(100);g__Acidovorax(87);unclassified;
ICSZ4EG01DJ4Z8	k__Bacteria(100);p__Proteobacteria(100);c__Betaproteobacteria(100);o__Burkholderiales(100);f__Comamonadaceae(100);g__Acidovorax(95);unclassified;
ICSZ4EG01D744X	k__Bacteria(100);p__Actinobacteria(100);c__Actinobacteria(100);o__Actinomycetales(100);f__Propionibacteriaceae(100);g__Propionibacterium(100);s__Propionibacteriumacne(100);
ICSZ4EG01CY5BS	k__Bacteria(100);p__Actinobacteria(100);c__Actinobacteria(100);o__Actinomycetales(100);f__Micrococcaceae(100);g__Micrococcus(100);s__Micrococcusluteu(100);
ICSZ4EG01CXNMV	k__Bacteria(100);p__Proteobacteria(100);c__Betaproteobacteria(100);o__Burkholderiales(100);f__Comamonadaceae(100);g__Acidovorax(95);unclassified;
ICSZ4EG01C3I59	k__Bacteria(100);p__Bacteroidetes(100);c__Flavobacteria(100);o__Flavobacteriales(100);f__Flavobacteriaceae(100);g__Chryseobacterium(80);unclassified;
ICSZ4EG01C0S9K	k__Bacteria(100);p__Proteobacteria(99);c__Betaproteobacteria(98);o__Burkholderiales(91);unclassified;unclassified;unclassified;
ICSZ4EG01BQNKA	k__Bacteria(100);p__Firmicutes(86);c__Bacilli(86);o__Bacillales(86);f__Staphylococcaceae(86);g__Staphylococcus(84);unclassified;
ICSZ4EG01BWMX0	k__Bacteria(100);p__Proteobacteria(99);c__Betaproteobacteria(99);o__Burkholderiales(99);f__Comamonadaceae(83);unclassified;unclassified;
ICSZ4EG01BLWUA	k__Bacteria(100);p__Bacteroidetes(100);c__Flavobacteria(100);o__Flavobacteriales(100);f__Flavobacteriaceae(100);unclassified;unclassified;
ICSZ4EG01BF91J	k__Bacteria(100);p__Proteobacteria(100);c__Betaproteobacteria(100);o__Burkholderiales(100);f__Comamonadaceae(100);g__Diaphorobacter(99);unclassified;
ICSZ4EG01AP6ZQ	k__Bacteria(100);p__Proteobacteria(100);c__Betaproteobacteria(96);o__Burkholderiales(93);unclassified;unclassified;unclassified;
ICSZ4EG01EYJJS	k__Bacteria(100);p__Proteobacteria(97);c__Alphaproteobacteria(92);o__Rhizobiales(84);f__Beijerinckiaceae(82);unclassified;unclassified;
ICSZ4EG01EY7G0	k__Bacteria(100);p__Bacteroidetes(100);c__Flavobacteria(100);o__Flavobacteriales(100);f__Flavobacteriaceae(100);unclassified;unclassified;
ICSZ4EG01EUK7S	k__Bacteria(100);p__Firmicutes(94);c__Bacilli(94);o__Lactobacillales(94);f__Aerococcaceae(89);unclassified;unclassified;
ICSZ4EG01EUJDM	k__Bacteria(100);p__Actinobacteria(100);c__Actinobacteria(100);o__Actinomycetales(100);f__Propionibacteriaceae(99);g__Propionibacterium(99);s__Propionibacteriumacne(99);
ICSZ4EG01ETGCZ	k__Bacteria(100);p__Bacteroidetes(100);c__Flavobacteria(100);o__Flavobacteriales(100);f__Flavobacteriaceae(100);unclassified;unclassified;
ICSZ4EG01ESP17	k__Bacteria(100);p__Bacteroidetes(100);c__Flavobacteria(100);o__Flavobacteriales(100);f__Flavobacteriaceae(100);unclassified;unclassified;
ICSZ4EG01ESLH6	k__Bacteria(100);p__Proteobacteria(100);c__Betaproteobacteria(100);o__Burkholderiales(100);f__Comamonadaceae(100);g__Acidovorax(88);unclassified;
ICSZ4EG01ES3HF	k__Bacteria(100);p__Proteobacteria(100);c__Betaproteobacteria(99);o__Burkholderiales(99);unclassified;unclassified;unclassified;
ICSZ4EG01ER1UQ	k__Bacteria(100);p__Proteobacteria(100);c__Betaproteobacteria(100);o__Burkholderiales(100);f__Comamonadaceae(100);g__Acidovorax(97);unclassified;
ICSZ4EG01EORMM	k__Bacteria(100);p__Proteobacteria(100);c__Betaproteobacteria(99);o__Burkholderiales(95);unclassified;unclassified;unclassified;
ICSZ4EG01ENGQW	k__Bacteria(100);p__Proteobacteria(100);c__Betaproteobacteria(100);o__Burkholderiales(100);f__Comamonadaceae(100);unclassified;unclassified;
ICSZ4EG01EKLAQ	k__Bacteria(100);p__Proteobacteria(100);c__Betaproteobacteria(100);o__Burkholderiales(98);unclassified;unclassified;unclassified;
ICSZ4EG01EKEBG	k__Bacteria(100);p__Bacteroidetes(100);c__Flavobacteria(100);o__Flavobacteriales(100);f__Flavobacteriaceae(100);unclassified;unclassified;
ICSZ4EG01EJ5QP	k__Bacteria(100);p__Firmicutes(94);c__Bacilli(94);o__Lactobacillales(94);f__Aerococcaceae(91);unclassified;unclassified;
ICSZ4EG01EJ2JV	k__Bacteria(100);p__Proteobacteria(99);c__Betaproteobacteria(99);o__Burkholderiales(99);unclassified;unclassified;unclassified;
ICSZ4EG01EJ0CI	k__Bacteria(100);p__Proteobacteria(100);c__Betaproteobacteria(100);o__Burkholderiales(100);f__Comamonadaceae(99);g__Acidovorax(96);s__Acidovoraxcaen(95);
ICSZ4EG01EIXBI	k__Bacteria(100);p__Proteobacteria(100);c__Betaproteobacteria(100);o__Burkholderiales(98);unclassified;unclassified;unclassified;
ICSZ4EG01EH609	k__Bacteria(100);p__Proteobacteria(100);c__Betaproteobacteria(100);o__Burkholderiales(100);f__Comamonadaceae(100);g__Acidovorax(93);unclassified;
ICSZ4EG01EEXLW	k__Bacteria(100);p__Proteobacteria(100);c__Betaproteobacteria(100);o__Burkholderiales(99);unclassified;unclassified;unclassified;
ICSZ4EG01EEXFW	k__Bacteria(100);p__Bacteroidetes(100);c__Flavobacteria(100);o__Flavobacteriales(100);f__Flavobacteriaceae(100);unclassified;unclassified;
ICSZ4EG01EEGZW	k__Bacteria(100);p__Firmicutes(100);c__Clostridia(100);o__Clostridiales(100);f__Lachnospiraceae(100);g__Clostridium(92);unclassified;
ICSZ4EG01EE611	k__Bacteria(100);p__Proteobacteria(100);c__Betaproteobacteria(100);o__Burkholderiales(100);f__Comamonadaceae(93);unclassified;unclassified;
ICSZ4EG01ECZ5P	k__Bacteria(100);p__Proteobacteria(100);c__Betaproteobacteria(100);o__Burkholderiales(100);f__Comamonadaceae(100);g__Diaphorobacter(81);unclassified;
ICSZ4EG01ECINN	k__Bacteria(99);p__Proteobacteria(98);c__Betaproteobacteria(98);o__Burkholderiales(98);unclassified;unclassified;unclassified;
ICSZ4EG01EC4OA	k__Bacteria(100);p__Proteobacteria(100);c__Betaproteobacteria(99);o__Burkholderiales(95);f__Comamonadaceae(80);unclassified;unclassified;
ICSZ4EG01DY3QW	k__Bacteria(100);p__Proteobacteria(98);c__Betaproteobacteria(98);o__Burkholderiales(94);unclassified;unclassified;unclassified;
ICSZ4EG01DXJ4X	k__Bacteria(100);p__Proteobacteria(100);c__Betaproteobacteria(100);o__Burkholderiales(98);unclassified;unclassified;unclassified;
ICSZ4EG01DUTB4	k__Bacteria(100);p__Proteobacteria(100);c__Betaproteobacteria(100);o__Burkholderiales(100);f__Comamonadaceae(100);g__Acidovorax(92);unclassified;
ICSZ4EG01DSJ6T	k__Bacteria(100);p__Proteobacteria(100);c__Betaproteobacteria(97);o__Burkholderiales(94);unclassified;unclassified;unclassified;
ICSZ4EG01DQX74	k__Bacteria(100);p__Proteobacteria(100);c__Betaproteobacteria(100);o__Burkholderiales(100);f__Comamonadaceae(100);unclassified;unclassified;
ICSZ4EG01DQHQ4	k__Bacteria(100);p__Proteobacteria(100);c__Betaproteobacteria(99);o__Burkholderiales(97);unclassified;unclassified;unclassified;
ICSZ4EG01DPNS2	k__Bacteria(100);p__Proteobacteria(99);c__Betaproteobacteria(98);o__Burkholderiales(96);unclassified;unclassified;unclassified;
ICSZ4EG01DNILP	k__Bacteria(100);p__Proteobacteria(100);c__Betaproteobacteria(100);o__Burkholderiales(100);f__Comamonadaceae(100);g__Diaphorobacter(97);unclassified;
ICSZ4EG01DJQ8K	k__Bacteria(100);p__Proteobacteria(100);c__Betaproteobacteria(100);o__Burkholderiales(100);f__Comamonadaceae(100);unclassified;unclassified;
ICSZ4EG01DJIEK	k__Bacteria(100);p__Proteobacteria(100);c__Betaproteobacteria(99);o__Burkholderiales(96);unclassified;unclassified;unclassified;
ICSZ4EG01DIQAQ	k__Bacteria(100);p__Proteobacteria(100);c__Betaproteobacteria(100);o__Burkholderiales(100);unclassified;unclassified;unclassified;
ICSZ4EG01DHERQ	k__Bacteria(100);p__Proteobacteria(100);c__Betaproteobacteria(100);o__Burkholderiales(100);f__Comamonadaceae(100);unclassified;unclassified;
ICSZ4EG01DEHU7	k__Bacteria(100);p__Proteobacteria(100);c__Betaproteobacteria(100);o__Burkholderiales(100);f__Comamonadaceae(100);g__Diaphorobacter(96);unclassified;
ICSZ4EG01DEAAS	k__Bacteria(100);p__Proteobacteria(100);c__Betaproteobacteria(100);o__Burkholderiales(100);f__Comamonadaceae(100);g__Acidovorax(94);unclassified;
ICSZ4EG01DE3EF	k__Bacteria(100);p__Proteobacteria(100);c__Betaproteobacteria(99);o__Burkholderiales(96);unclassified;unclassified;unclassified;
ICSZ4EG01DDJYJ	k__Bacteria(100);p__Proteobacteria(100);c__Betaproteobacteria(100);o__Burkholderiales(100);f__Comamonadaceae(100);g__Acidovorax(98);unclassified;
ICSZ4EG01DDH4D	k__Bacteria(100);p__Bacteroidetes(100);c__Flavobacteria(100);o__Flavobacteriales(100);f__Flavobacteriaceae(100);unclassified;unclassified;
ICSZ4EG01BZ575	k__Bacteria(100);p__Proteobacteria(100);c__Betaproteobacteria(99);o__Burkholderiales(99);f__Comamonadaceae(80);unclassified;unclassified;
ICSZ4EG01DC7FQ	k__Bacteria(100);p__Proteobacteria(100);c__Betaproteobacteria(100);o__Burkholderiales(100);f__Comamonadaceae(100);g__Acidovorax(94);s__Acidovoraxcaen(88);
ICSZ4EG01DC0DS	k__Bacteria(100);p__Proteobacteria(100);c__Betaproteobacteria(100);o__Burkholderiales(100);f__Comamonadaceae(99);g__Diaphorobacter(94);unclassified;
ICSZ4EG01DBZW0	k__Bacteria(100);p__Proteobacteria(99);c__Betaproteobacteria(98);o__Burkholderiales(95);unclassified;unclassified;unclassified;
ICSZ4EG01DBXE8	k__Bacteria(100);p__Proteobacteria(100);c__Betaproteobacteria(100);o__Burkholderiales(100);f__Comamonadaceae(100);g__Acidovorax(94);unclassified;
ICSZ4EG01DAQOY	k__Bacteria(100);p__Proteobacteria(100);c__Alphaproteobacteria(100);o__Sphingomonadales(100);f__Sphingomonadaceae(100);g__Sphingomonas(99);s__Caulobacterleidyi(99);
ICSZ4EG01D823X	k__Bacteria(100);p__Proteobacteria(97);c__Betaproteobacteria(97);o__Burkholderiales(95);unclassified;unclassified;unclassified;
ICSZ4EG01D661A	k__Bacteria(100);p__Proteobacteria(100);c__Betaproteobacteria(100);o__Burkholderiales(100);f__Comamonadaceae(100);unclassified;unclassified;
ICSZ4EG01D6507	k__Bacteria(100);p__Proteobacteria(100);c__Betaproteobacteria(100);o__Burkholderiales(100);f__Comamonadaceae(100);g__Diaphorobacter(98);unclassified;
ICSZ4EG01D4ND9	k__Bacteria(100);p__Proteobacteria(100);c__Betaproteobacteria(100);o__Burkholderiales(100);f__Comamonadaceae(100);g__Diaphorobacter(96);unclassified;
ICSZ4EG01D4APO	k__Bacteria(100);p__Proteobacteria(100);c__Betaproteobacteria(100);o__Burkholderiales(98);unclassified;unclassified;unclassified;
ICSZ4EG01D43K5	k__Bacteria(100);p__Proteobacteria(100);c__Betaproteobacteria(100);o__Burkholderiales(100);f__Comamonadaceae(100);unclassified;unclassified;
ICSZ4EG01D3UWV	k__Bacteria(100);p__Proteobacteria(100);c__Betaproteobacteria(100);o__Burkholderiales(100);f__Comamonadaceae(100);g__Acidovorax(97);s__Acidovoraxcaen(86);
ICSZ4EG01D2S4X	k__Bacteria(100);p__Proteobacteria(99);c__Betaproteobacteria(97);o__Burkholderiales(96);unclassified;unclassified;unclassified;
ICSZ4EG01CZW6Q	k__Bacteria(100);p__Proteobacteria(100);c__Betaproteobacteria(100);o__Burkholderiales(100);f__Comamonadaceae(99);unclassified;unclassified;
ICSZ4EG01CZEI5	k__Bacteria(100);p__Firmicutes(100);c__Clostridia(100);o__Clostridiales(100);f__Lachnospiraceae(100);g__Clostridium(100);s__Clostridiumcelerecrescen(100);
ICSZ4EG01CZAAK	k__Bacteria(100);p__Bacteroidetes(100);c__Flavobacteria(100);o__Flavobacteriales(100);f__Flavobacteriaceae(100);unclassified;unclassified;
ICSZ4EG01CXZHR	k__Bacteria(100);p__Proteobacteria(100);c__Betaproteobacteria(100);o__Burkholderiales(100);f__Comamonadaceae(100);g__Acidovorax(100);s__Acidovoraxcaen(91);
ICSZ4EG01CXK0X	k__Bacteria(100);p__Proteobacteria(100);c__Betaproteobacteria(98);o__Burkholderiales(97);unclassified;unclassified;unclassified;
ICSZ4EG01CWZ3T	k__Bacteria(100);p__Proteobacteria(100);c__Betaproteobacteria(100);o__Burkholderiales(100);f__Comamonadaceae(100);g__Acidovorax(83);s__Acidovoraxcaen(80);
ICSZ4EG01CUHUN	k__Bacteria(100);p__Proteobacteria(100);c__Alphaproteobacteria(100);o__Sphingomonadales(100);f__Sphingomonadaceae(100);g__Sphingomonas(100);s__Caulobacterleidyi(100);
ICSZ4EG01CTE6O	k__Bacteria(100);p__Proteobacteria(100);c__Betaproteobacteria(100);o__Burkholderiales(100);unclassified;unclassified;unclassified;
ICSZ4EG01CSMXH	k__Bacteria(100);p__Proteobacteria(100);c__Betaproteobacteria(100);o__Burkholderiales(100);unclassified;unclassified;unclassified;
ICSZ4EG01CSA59	k__Bacteria(100);p__Proteobacteria(100);c__Betaproteobacteria(97);o__Burkholderiales(93);f__Comamonadaceae(90);unclassified;unclassified;
ICSZ4EG02J1T3V	k__Bacteria(100);p__Proteobacteria(100);c__Betaproteobacteria(100);o__Burkholderiales(100);f__Comamonadaceae(86);unclassified;unclassified;
ICSZ4EG01CRUIG	k__Bacteria(100);p__Proteobacteria(100);c__Betaproteobacteria(100);o__Burkholderiales(100);f__Comamonadaceae(100);g__Acidovorax(90);unclassified;
ICSZ4EG01CQM3Y	k__Bacteria(100);p__Proteobacteria(100);c__Betaproteobacteria(99);o__Burkholderiales(99);f__Comamonadaceae(98);g__Diaphorobacter(82);unclassified;
ICSZ4EG01CPVAH	k__Bacteria(100);p__Proteobacteria(98);c__Betaproteobacteria(97);o__Burkholderiales(97);f__Comamonadaceae(80);unclassified;unclassified;
ICSZ4EG01CNU6F	k__Bacteria(100);p__Bacteroidetes(100);c__Flavobacteria(100);o__Flavobacteriales(100);f__Flavobacteriaceae(100);unclassified;unclassified;
ICSZ4EG01CNPQV	k__Bacteria(100);p__Bacteroidetes(99);c__Flavobacteria(99);o__Flavobacteriales(99);f__Flavobacteriaceae(99);unclassified;unclassified;
ICSZ4EG01CMNVR	k__Bacteria(100);p__Proteobacteria(98);c__Betaproteobacteria(98);o__Burkholderiales(95);unclassified;unclassified;unclassified;
ICSZ4EG01CM0QC	k__Bacteria(100);p__Proteobacteria(100);c__Betaproteobacteria(100);o__Burkholderiales(100);f__Comamonadaceae(100);g__Acidovorax(80);unclassified;
ICSZ4EG01CLH25	k__Bacteria(100);p__Bacteroidetes(100);c__Flavobacteria(100);o__Flavobacteriales(100);f__Flavobacteriaceae(100);unclassified;unclassified;
ICSZ4EG01CLH0I	k__Bacteria(100);p__Proteobacteria(100);c__Betaproteobacteria(100);o__Burkholderiales(100);f__Comamonadaceae(100);g__Acidovorax(88);unclassified;
ICSZ4EG01CJZ8E	k__Bacteria(100);p__Proteobacteria(100);c__Betaproteobacteria(99);o__Burkholderiales(95);unclassified;unclassified;unclassified;
ICSZ4EG01CJJYG	k__Bacteria(100);p__Proteobacteria(100);c__Betaproteobacteria(100);o__Burkholderiales(100);f__Comamonadaceae(99);g__Diaphorobacter(85);unclassified;
ICSZ4EG01CIAK1	k__Bacteria(100);p__Firmicutes(97);c__Clostridia(97);o__Clostridiales(97);f__Ruminococcaceae(97);unclassified;unclassified;
ICSZ4EG01CI2ZF	k__Bacteria(100);p__Proteobacteria(100);c__Betaproteobacteria(100);o__Burkholderiales(99);unclassified;unclassified;unclassified;
ICSZ4EG01CGGJZ	k__Bacteria(98);p__Proteobacteria(98);c__Betaproteobacteria(96);o__Burkholderiales(94);unclassified;unclassified;unclassified;
ICSZ4EG01CFNI3	k__Bacteria(100);p__Proteobacteria(100);c__Betaproteobacteria(100);o__Burkholderiales(100);f__Comamonadaceae(100);g__Acidovorax(96);s__Acidovoraxcaen(87);
ICSZ4EG01CFJCB	k__Bacteria(100);p__Proteobacteria(100);c__Betaproteobacteria(100);o__Burkholderiales(100);f__Comamonadaceae(100);g__Acidovorax(93);unclassified;
ICSZ4EG01CEYOU	k__Bacteria(100);p__Proteobacteria(100);c__Betaproteobacteria(99);o__Burkholderiales(97);unclassified;unclassified;unclassified;
ICSZ4EG01CDYJY	k__Bacteria(100);p__Proteobacteria(100);c__Betaproteobacteria(100);o__Burkholderiales(100);f__Comamonadaceae(100);g__Diaphorobacter(96);unclassified;
ICSZ4EG01CBMII	k__Bacteria(100);p__Bacteroidetes(100);c__Flavobacteria(100);o__Flavobacteriales(100);f__Flavobacteriaceae(100);unclassified;unclassified;
ICSZ4EG01CB6LM	k__Bacteria(100);p__Proteobacteria(100);c__Betaproteobacteria(99);o__Burkholderiales(99);f__Comamonadaceae(96);unclassified;unclassified;
ICSZ4EG01CAZ18	k__Bacteria(100);p__Proteobacteria(100);c__Betaproteobacteria(100);o__Burkholderiales(100);f__Comamonadaceae(100);g__Acidovorax(98);s__Acidovoraxcaen(90);
ICSZ4EG01C5G07	k__Bacteria(100);p__Proteobacteria(100);c__Betaproteobacteria(100);o__Burkholderiales(99);f__Comamonadaceae(80);unclassified;unclassified;
ICSZ4EG01C8DVK	k__Bacteria(100);p__Proteobacteria(99);c__Betaproteobacteria(99);o__Burkholderiales(98);unclassified;unclassified;unclassified;
ICSZ4EG01C6XQM	k__Bacteria(100);p__Proteobacteria(99);c__Betaproteobacteria(96);o__Burkholderiales(94);unclassified;unclassified;unclassified;
ICSZ4EG01C62Q3	k__Bacteria(100);p__Proteobacteria(100);c__Betaproteobacteria(99);o__Burkholderiales(99);unclassified;unclassified;unclassified;
ICSZ4EG01C539M	k__Bacteria(100);p__Proteobacteria(100);c__Betaproteobacteria(100);o__Burkholderiales(100);f__Comamonadaceae(89);unclassified;unclassified;
ICSZ4EG01C439P	k__Bacteria(100);p__Proteobacteria(100);c__Betaproteobacteria(100);o__Burkholderiales(96);f__Comamonadaceae(80);unclassified;unclassified;
ICSZ4EG01C1VQV	k__Bacteria(100);p__Proteobacteria(99);c__Betaproteobacteria(99);o__Burkholderiales(99);unclassified;unclassified;unclassified;
ICSZ4EG01C0N31	k__Bacteria(100);p__Bacteroidetes(100);c__Flavobacteria(100);o__Flavobacteriales(100);f__Flavobacteriaceae(100);unclassified;unclassified;
ICSZ4EG01BUBNM	k__Bacteria(100);p__Proteobacteria(100);c__Betaproteobacteria(100);o__Burkholderiales(100);f__Comamonadaceae(100);g__Acidovorax(96);s__Acidovoraxcaen(86);
ICSZ4EG01BTI4Y	k__Bacteria(98);p__Proteobacteria(98);c__Betaproteobacteria(96);o__Burkholderiales(94);unclassified;unclassified;unclassified;
ICSZ4EG01BSS0W	k__Bacteria(100);p__Proteobacteria(100);c__Betaproteobacteria(100);o__Burkholderiales(100);f__Comamonadaceae(100);unclassified;unclassified;
ICSZ4EG01BRMF7	k__Bacteria(100);p__Proteobacteria(100);c__Betaproteobacteria(100);o__Burkholderiales(100);f__Comamonadaceae(98);unclassified;unclassified;
ICSZ4EG01BQODJ	k__Bacteria(100);p__Proteobacteria(100);c__Betaproteobacteria(97);o__Burkholderiales(97);unclassified;unclassified;unclassified;
ICSZ4EG01BPQ0G	k__Bacteria(100);p__Proteobacteria(100);c__Betaproteobacteria(99);o__Burkholderiales(99);unclassified;unclassified;unclassified;
ICSZ4EG01BONVB	k__Bacteria(100);p__Bacteroidetes(100);c__Flavobacteria(100);o__Flavobacteriales(100);f__Flavobacteriaceae(100);unclassified;unclassified;
ICSZ4EG01BLH6Y	k__Bacteria(100);p__Bacteroidetes(100);c__Flavobacteria(100);o__Flavobacteriales(100);f__Flavobacteriaceae(100);unclassified;unclassified;
ICSZ4EG01BKOCQ	k__Bacteria(100);p__Proteobacteria(100);c__Betaproteobacteria(98);o__Burkholderiales(97);f__Comamonadaceae(81);unclassified;unclassified;
ICSZ4EG01BJ3RW	k__Bacteria(100);p__Proteobacteria(100);c__Alphaproteobacteria(99);o__Sphingomonadales(99);f__Sphingomonadaceae(99);g__Sphingomonas(99);s__Caulobacterleidyi(99);
ICSZ4EG01BIN6X	k__Bacteria(100);p__Bacteroidetes(100);c__Flavobacteria(100);o__Flavobacteriales(100);f__Flavobacteriaceae(100);unclassified;unclassified;
ICSZ4EG01BI58L	k__Bacteria(100);p__Proteobacteria(100);c__Betaproteobacteria(100);o__Burkholderiales(100);f__Comamonadaceae(100);g__Acidovorax(89);unclassified;
ICSZ4EG01BHV38	k__Bacteria(100);p__Proteobacteria(100);c__Betaproteobacteria(100);o__Burkholderiales(100);f__Comamonadaceae(100);g__Acidovorax(96);s__Acidovoraxcaen(89);
ICSZ4EG01BH4N5	k__Bacteria(100);p__Proteobacteria(100);c__Betaproteobacteria(100);o__Burkholderiales(100);f__Comamonadaceae(100);unclassified;unclassified;
ICSZ4EG01BD1JN	k__Bacteria(100);p__Proteobacteria(100);c__Alphaproteobacteria(100);o__Sphingomonadales(100);f__Sphingomonadaceae(100);g__Sphingomonas(100);s__Caulobacterleidyi(100);
ICSZ4EG01BCCO0	k__Bacteria(100);p__Proteobacteria(100);c__Betaproteobacteria(99);o__Burkholderiales(99);unclassified;unclassified;unclassified;
ICSZ4EG01BBYBD	k__Bacteria(100);p__Proteobacteria(100);c__Betaproteobacteria(100);o__Burkholderiales(100);f__Comamonadaceae(99);unclassified;unclassified;
ICSZ4EG01BAVEQ	k__Bacteria(100);p__Proteobacteria(99);c__Betaproteobacteria(97);o__Burkholderiales(97);unclassified;unclassified;unclassified;
ICSZ4EG01BATH5	k__Bacteria(100);p__Proteobacteria(99);c__Betaproteobacteria(99);o__Burkholderiales(99);unclassified;unclassified;unclassified;
ICSZ4EG01B6MN0	k__Bacteria(100);p__Proteobacteria(100);c__Betaproteobacteria(99);o__Burkholderiales(97);unclassified;unclassified;unclassified;
ICSZ4EG01B3MS9	k__Bacteria(100);p__Proteobacteria(100);c__Betaproteobacteria(100);o__Burkholderiales(100);f__Comamonadaceae(100);g__Acidovorax(96);unclassified;
ICSZ4EG01B1MW0	k__Bacteria(100);p__Bacteroidetes(100);c__Flavobacteria(100);o__Flavobacteriales(100);f__Flavobacteriaceae(100);g__Chryseobacterium(81);unclassified;
ICSZ4EG01B0IIG	k__Bacteria(100);p__Bacteroidetes(100);c__Flavobacteria(100);o__Flavobacteriales(100);f__Flavobacteriaceae(100);unclassified;unclassified;
ICSZ4EG01AYYOR	k__Bacteria(100);p__Proteobacteria(100);c__Betaproteobacteria(99);o__Burkholderiales(99);unclassified;unclassified;unclassified;
ICSZ4EG01AVNMO	k__Bacteria(100);p__Proteobacteria(100);c__Betaproteobacteria(100);o__Burkholderiales(100);f__Comamonadaceae(100);g__Acidovorax(98);unclassified;
ICSZ4EG01AU7F8	k__Bacteria(100);p__Proteobacteria(100);c__Betaproteobacteria(100);o__Burkholderiales(99);unclassified;unclassified;unclassified;
ICSZ4EG01ATD4U	k__Bacteria(100);p__Proteobacteria(100);c__Betaproteobacteria(100);o__Burkholderiales(100);f__Comamonadaceae(100);g__Acidovorax(92);s__Acidovoraxfacili(80);
ICSZ4EG01AQOOZ	k__Bacteria(100);p__Proteobacteria(100);c__Betaproteobacteria(100);o__Burkholderiales(98);unclassified;unclassified;unclassified;
ICSZ4EG01AP0S2	k__Bacteria(100);p__Proteobacteria(100);c__Betaproteobacteria(99);o__Burkholderiales(98);unclassified;unclassified;unclassified;
ICSZ4EG01ALX6A	k__Bacteria(100);p__Proteobacteria(100);c__Betaproteobacteria(99);o__Burkholderiales(99);unclassified;unclassified;unclassified;
ICSZ4EG01AF772	k__Bacteria(100);p__Proteobacteria(100);c__Betaproteobacteria(100);o__Burkholderiales(100);f__Comamonadaceae(100);g__Acidovorax(94);unclassified;
ICSZ4EG01AE37U	k__Bacteria(100);p__Proteobacteria(100);c__Betaproteobacteria(100);o__Burkholderiales(100);f__Comamonadaceae(100);unclassified;unclassified;
ICSZ4EG01A9LTZ	k__Bacteria(100);p__Proteobacteria(100);c__Alphaproteobacteria(100);o__Sphingomonadales(100);f__Sphingomonadaceae(100);g__Sphingomonas(100);s__Caulobacterleidyi(100);
ICSZ4EG01A8LO8	k__Bacteria(100);p__Bacteroidetes(100);c__Flavobacteria(100);o__Flavobacteriales(100);f__Flavobacteriaceae(100);unclassified;unclassified;
ICSZ4EG01A8FZ2	k__Bacteria(100);p__Proteobacteria(100);c__Betaproteobacteria(100);o__Burkholderiales(100);f__Comamonadaceae(99);unclassified;unclassified;
ICSZ4EG01A55E0	k__Bacteria(100);p__Proteobacteria(100);c__Betaproteobacteria(100);o__Burkholderiales(99);unclassified;unclassified;unclassified;
ICSZ4EG01A52G9	k__Bacteria(100);p__Proteobacteria(100);c__Betaproteobacteria(100);o__Burkholderiales(100);f__Comamonadaceae(100);g__Diaphorobacter(97);unclassified;
ICSZ4EG01A4JUB	k__Bacteria(100);p__Proteobacteria(100);c__Betaproteobacteria(100);o__Burkholderiales(100);unclassified;unclassified;unclassified;
ICSZ4EG01A4HBH	k__Bacteria(100);p__Firmicutes(100);c__Bacilli(100);o__Bacillales(100);f__Staphylococcaceae(100);g__Staphylococcus(100);s__Staphylococcusepidermidi(99);
ICSZ4EG01A33PO	k__Bacteria(100);p__Proteobacteria(100);c__Betaproteobacteria(100);o__Burkholderiales(99);f__Comamonadaceae(99);g__Acidovorax(88);s__Acidovoraxcaen(83);
ICSZ4EG01A0X5U	k__Bacteria(100);p__Proteobacteria(100);c__Betaproteobacteria(100);o__Burkholderiales(100);f__Comamonadaceae(97);g__Diaphorobacter(82);unclassified;
ICSZ4EG01DBWYL	k__Bacteria(100);p__Firmicutes(98);c__Bacilli(96);o__Lactobacillales(96);unclassified;unclassified;unclassified;
ICSZ4EG01EJ0NP	k__Bacteria(100);unclassified;unclassified;unclassified;unclassified;unclassified;unclassified;
ICSZ4EG01DEMQY	k__Bacteria(100);p__Firmicutes(94);c__Clostridia(89);o__Clostridiales(89);f__Lachnospiraceae(85);unclassified;unclassified;
ICSZ4EG01D2I7P	k__Bacteria(100);p__Bacteroidetes(91);c__Bacteroidia(87);o__Bacteroidales(87);unclassified;unclassified;unclassified;
ICSZ4EG01CVQ60	k__Bacteria(100);p__Proteobacteria(100);c__Betaproteobacteria(100);o__Burkholderiales(100);f__Comamonadaceae(100);g__Comamonas(100);unclassified;
ICSZ4EG01ASTJ3	k__Bacteria(100);p__Proteobacteria(100);c__Betaproteobacteria(100);o__Burkholderiales(100);f__Comamonadaceae(99);unclassified;unclassified;
ICSZ4EG01CDQAZ	k__Bacteria(100);p__Proteobacteria(100);c__Betaproteobacteria(100);o__Burkholderiales(100);f__Comamonadaceae(100);g__Diaphorobacter(84);unclassified;
ICSZ4EG01AKFHG	k__Bacteria(100);p__Proteobacteria(100);c__Alphaproteobacteria(100);o__Rhizobiales(100);f__Methylobacteriaceae(94);g__Methylobacterium(94);unclassified;
ICSZ4EG01EDQ5F	k__Bacteria(100);p__Actinobacteria(100);c__Actinobacteria(100);o__Actinomycetales(100);f__Nocardioidaceae(100);g__Nocardioides(100);unclassified;
ICSZ4EG01DMGP2	k__Bacteria(100);p__Proteobacteria(100);c__Alphaproteobacteria(100);o__Sphingomonadales(100);f__Sphingomonadaceae(100);g__Sphingomonas(100);s__Caulobacterleidyi(100);
ICSZ4EG01B9HLZ	k__Bacteria(100);p__Proteobacteria(100);c__Betaproteobacteria(100);o__Burkholderiales(100);f__Comamonadaceae(100);g__Acidovorax(88);unclassified;
ICSZ4EG01D84Y6	k__Bacteria(100);p__Proteobacteria(100);c__Betaproteobacteria(100);o__Burkholderiales(100);f__Comamonadaceae(100);unclassified;unclassified;
ICSZ4EG01CF612	k__Bacteria(100);p__Firmicutes(92);c__Bacilli(91);o__Lactobacillales(88);unclassified;unclassified;unclassified;
ICSZ4EG01C8VH0	k__Bacteria(100);p__Proteobacteria(100);c__Alphaproteobacteria(100);o__Rhizobiales(93);f__Phyllobacteriaceae(88);unclassified;unclassified;
ICSZ4EG01DY3ZL	k__Bacteria(100);p__Proteobacteria(100);c__Betaproteobacteria(100);o__Burkholderiales(100);f__Comamonadaceae(100);g__Comamonas(85);unclassified;
ICSZ4EG01BM4ZB	k__Bacteria(100);p__Bacteroidetes(100);c__Sphingobacteria(100);o__Sphingobacteriales(100);f__Flexibacteraceae(100);g__Hymenobacter(100);unclassified;
ICSZ4EG01DYFNT	k__Bacteria(100);p__Proteobacteria(100);c__Betaproteobacteria(100);o__Burkholderiales(100);f__Comamonadaceae(94);unclassified;unclassified;
ICSZ4EG01BCSE0	k__Bacteria(100);p__Proteobacteria(100);c__Betaproteobacteria(100);o__Burkholderiales(100);f__Comamonadaceae(100);g__Acidovorax(96);unclassified;
ICSZ4EG01ALDGQ	k__Bacteria(100);p__Proteobacteria(100);c__Betaproteobacteria(100);o__Burkholderiales(100);f__Comamonadaceae(100);g__Acidovorax(98);unclassified;
ICSZ4EG01EYUWM	k__Bacteria(100);p__Proteobacteria(100);c__Betaproteobacteria(100);o__Burkholderiales(95);unclassified;unclassified;unclassified;
ICSZ4EG01EWUB2	k__Bacteria(100);p__Proteobacteria(100);c__Alphaproteobacteria(100);o__Sphingomonadales(100);f__Sphingomonadaceae(100);g__Sphingomonas(96);s__Caulobacterleidyi(96);
ICSZ4EG01EVVI9	k__Bacteria(100);p__Proteobacteria(100);c__Betaproteobacteria(100);o__Burkholderiales(98);unclassified;unclassified;unclassified;
ICSZ4EG01ESB9D	k__Bacteria(100);p__Proteobacteria(100);c__Betaproteobacteria(98);o__Burkholderiales(98);unclassified;unclassified;unclassified;
[truncated: 19,036 more rows]
