# Supplementary material for: Changes in the Bacterial Microbiota in Gut, Blood, and Lungs following Acute LPS Instillation into Mice Lungs
Source: PLoS One. 2014 Oct 21;9(10):e111228. doi: 10.1371/journal.pone.0111228 (PMC4205020; doi:10.1371/journal.pone.0111228)
Supplement: Table S6 — Antibiotic sequence identification list. (XLSX) [file pone.0111228.s007.xlsx]

## Sheet: Table S6
>ICSZ4EG01ER6AS
A-A-C--G-A-A-C-G-C--T-G-G-C--G-G--C-A-T-G---C---C-T--AA-C--AC-A-T-G-C--A-A-G--T-C--GA-A-CG-A---------G-A-----------------------------------------------C-C--------------------TTC-G---------------------------G--G------------------------------------------TC--T-------AG-T-G-G-C-GC-A--C--G-GG--T--G-C-G-T-A-AC-G-C-G-T-G-GG---A-A-T-CT-G--C-C-CTT--GG-G----T-T-C-G-G-A---AT-AA-C--TC------------------G-C-C-…
>ICSZ4EG01DS5OT
A-T-T--G-A-A-C-G-C--T-G-G-C--G-G--C-A-T-G---C---C-T--TA-C--AC-A-T-G-C--A-A-G--T-C--GA-A-CG-----------G-TA-----A--C---------------------------------G-G-G----------------------TCC-T---------------------------T--C--G-G-------------------------G-A-T----GCCGAC-G-------AG-T-G-G-C-GA-A--C--G-GG--T--G-A-G-T-A-AT-A-T-A-T-C-GG---A-A-C-GT-G--C-C-CAG--TA-G----T-G-G-G-G-G---AT-AA-C--TG------------------C-T-C-…
>ICSZ4EG01D7ZRG
G-A-T--G-A-A-C-G-C--T-A-G-C--G-G--G-A-G-G---C---C-T--AA-C--AC-A-T-G-C--A-A-G--C-C--GA-G-CG-G---------T-A----T-T--G---------------------------------T-T-T-C--------------------TTC-G---------------------------G--A--A-A---------------------------T-G----A--GA--G-------AG-C-G-G-C-GT-A--C--G-GG--T--G-C-G-G-A-AC-A-C-G-T-G-TG---CAA-C-CT-G--C-C-TTT--AT-C----T-G-G-G-G-G---AT-AG-C--CT------------------T-T-C-…
>ICSZ4EG01BNKCW
A-T-T--G-A-A-C-G-C--T-G-G-C--G-G--C-A-T-G---C---C-T--TA-C--AC-A-T-G-C--A-A-G--T-C--GA-A-CG-----------G-TAA--C-A--G-----------------------------------G-T-C--------------------TTC-G---------------------------G--A--T---------------------------G-C-T----G--AC--G-------AG-T-G-G-C-GA-A--C--G-GG--T--G-A-G-T-A-AT-A-C-A-T-C-GG---A-A-C-GT-G--C-C-CGA--TC-G----T-G-G-G-G-G---AT-AA-C--GA------------------G-G-C-…
>ICSZ4EG01D0PVD
G-A-T--G-A-A-C-G-C--T-A-G-C--G-G--G-A-G-G---C---C-T--AA-C--AC-A-T-G-C--A-A-G--C-C--GA-G-CG-G---------T-A----T-T--G---------------------------------T-T-T-C--------------------TTC-G---------------------------G--A--A-A---------------------------T-G----A--GA--G-------AG-C-G-G-C-GT-A--C--G-GG--T--G-C-G-G-A-AC-A-C-G-T-G-TG---CAA-C-CT-G--C-C-TTT--AT-C----T-G-G-G-G-G---AT-AG-C--CT------------------T-T-C-…
>ICSZ4EG01CZCFK
G-A-T--G-A-A-C-G-C--T-G-G-C--G-G--C-G-T-G---C---T-T--AA-C--AC-A-T-G-C--A-A-G--T-C--GA-A-CG-G---------A-G----T-T--A---------ATTTGA-G-----------GA-A-GCAAG-C------------------TTGCT-T---------------------------G--A----A-G-A--A-T--TGAAT-----------T-A----A--CT--T-------AG-T-G-G-C-GG-A--C--G-GG--C--G-A-G-T-A-AC-A-C-G-T-G-AG---CAA-C-CT-G--C-CTCT---TA-C----A-G-G-G-G-A---AT-AA-C--AA------------------C-G-G-…
>ICSZ4EG01C2JZM
G-A-C--G-A-A-C-G-C--T-G-G-C--G-G--C-G-T-G---C---T-T--AA-C--AC-A-T-G-C--A-A-G--T-C--GA-A-CG-----------G-AA---A-G--G-----------------------------C-C-C-T-G-C--------------------TTT-T---------------------------G--T--G-G-G-G-----------------------T-G----C--TC--G-------AG-T-G-G-C-GA-A--C--G-GG--T--G-A-G-T-A-AC-A-C-G-T-G-AG---TAA-C-CT-G--C-C-CTT--GA-C----T-T-T-G-G-G---AT-AA-C--TT------------------C-A-G-…
>ICSZ4EG01EK8UH
A-T-T--G-A-A-C-G-C--T-G-G-C--G-G--C-A-T-G---C---C-T--TA-C--AC-A-T-G-C--A-A-G--T-C--GA-A-CG-----------G-TAA--C-A--G-----------------------------------G-T-C--------------------TTC-G---------------------------G--A--T---------------------------G-C-T----G--AC--G-------AG-T-G-G-C-GA-A--C--G-GG--T--G-A-G-T-A-AT-A-C-A-T-C-GG---A-A-C-GT-G--C-C-CGA--TC-G----T-G-G-G-G-G---AT-AA-C--GA------------------A-G-C-…
>ICSZ4EG01A6VK2
A-T-T--G-A-A-C-G-C--T-G-G-C--G-G--C-A-T-G---C---C-T--TA-C--AC-A-T-G-C--A-A-G--T-C--GA-A-CG-----------G-TAA--C-A--G-----------------------------------G-T-C--------------------TTC-G---------------------------G--A--T---------------------------G-C-T----G--AC--G-------AG-T-G-G-C-GA-A--C--G-GG--T--G-A-G-T-A-AT-A-C-A-T-C-GG---A-A-C-GT-G--C-C-CAG--AC-G----T-G-G-G-G-G---AT-AA-C--GA------------------G-G-C-…
>ICSZ4EG01EPGNA
G-A-C--G-A-A-C-G-C--T-G-G-C--G-G--C-G-T-G---C---T-T--AA-C--AC-A-T-G-C--A-A-G--T-C--GA-A-CG-----------G-AA---A-G--G-----------------------------C-T-C-C-T-G--------------------CTT-G---------------------------C--A--G-G-G-G-----------------------T-A----C--TC--G-------AG-T-G-G-C-GA-A--C--G-GG--T--G-A-G-T-A-AC-A-C-G-T-G-GG---TGA-T-CT-G--C-C-TTG--TA-C----T-C-T-G-G-G---AT-AA-G--CT------------------T-G-G-…
>ICSZ4EG01EF6R1
A-T-T--G-A-A-C-G-C--T-G-G-C--G-G--C-A-T-G---C---C-T--TA-C--AC-A-T-G-C--A-A-G--T-C--GA-A-CG-A---------G-A-----------------------------------------------C-C--------------------TTC-G---------------------------G--G------------------------------------------TC--T-------AG-T-G-G-C-GC-A--C--G-GG--T--G-C-G-T-A-AC-G-C-G-T-G-GG---A-A-T-CT-G--C-C-CTT--GG-G----T-T-C-G-G-A---AT-AA-C--TC------------------G-C-C-…
>ICSZ4EG01D3B3N
A-T-T--G-A-A-C-G-C--T-G-G-C--G-G--C-A-T-G---C---C-T--TA-C--AC-A-T-G-C--A-A-G--T-C--GA-A-CG-----------G-TAA--CGG--G-------------------------------------TCC--------------------TTCGG---------------------------G--A--T---------------------------G-C-C----G--AC--G-------AG-T-G-G-C-GA-A--C--G-GG--T--G-A-G-T-A-AT-A-C-A-T-C-GG---A-A-C-GT-G--C-C-CGA--TC-G----T-G-G-G-G-G---AT-AA-C--GA------------------G-G-C-…
>ICSZ4EG01BRVJI
A-T-T--G-A-A-C-G-C--T-G-G-C--G-G--C-A-T-G---C---C-T--TA-C--AC-A-T-G-C--A-A-G--T-C--GA-A-CG-----------G-TA-----A--C---------------------------------A-G-G-T--------------------CTT-C---------------------------G--G--A-T-------------------------G-C-T----G--AC--G-------AG-T-G-G-C-GA-A--C--G-GG--T--G-A-G-T-A-AT-A-T-A-T-C-GG---A-A-C-GT-G--C-C-CAG--TA-G----T-G-G-G-G-G---AT-AA-C--TG------------------C-T-C-…
>ICSZ4EG01DL492
G-A-T--G-A-A-C-G-C--T-A-G-C--G-G--C-A-G-G---C---T-T--AA-T--AC-A-T-G-C--A-A-G--T-C--GT-G-GG-----------G-CAG--C-A--T----------------------------G--A---G-T-A--------------------GCA-A---------------------------T--A------C-T--T------------------G-A-T----G--GC--G-------AC-C-G-G-C-AA-A--C--G-GG--T--G-C-G-G-A-AC-A-C-G-T-A-CA---CAA-C-CT-T--C-C-TAC--AA-G----T-G-G-G-G-A---AT-AG-C--CC------------------A-G-A-…
>ICSZ4EG01DJG25
A-T-T--G-A-A-C-G-C--T-G-G-C--G-G--C-A-T-G---C---C-T--TA-C--AC-A-T-G-C--A-A-G--T-C--GA-A-CG-----------G-TAA--C-G--G-----------------------------------G-TCC--------------------TTCGG---------------------------G--A--T---------------------------G-C-C----G--AC--G-------AG-T-G-G-C-GA-A--C--G-GG--T--G-A-G-T-A-AT-A-C-A-T-C-GG---A-A-C-GT-G--C-C-CAG--AC-G----T-G-G-G-G-G---AT-AA-C--GA------------------G-G-C-…
>ICSZ4EG01EXWAO
A-A-C--G-A-A-C-G-C--T-G-G-C--G-G--C-A-T-G---C---C-T--AA-C--AC-A-T-G-C--A-A-G--T-C--GA-A-CG-----------G-TA-----A--C---------------------------------G-G-G----------------------TCC-T---------------------------T--C--G-G-------------------------G-A-T----GCCGAC-G-------AG-T-G-G-C-GA-A--C--G-GG--T--G-A-G-T-A-AT-A-T-A-T-C-GG---A-A-C-GT-G--C-C-CAG--TA-G----T-G-G-G-G-G---AT-AA-C--TG------------------C-T-C-…
>ICSZ4EG01AIDLV
G-A-T--G-A-A-C-G-C--T-G-G-C--G-G--C-A-T-G---C---T-T--AA-C--AC-A-T-G-C--A-A-G--T-C--GA-A-CG-A---------G-A-----------------------------------------------C-C--------------------TTC-G---------------------------G--G------------------------------------------TC--T-------AG-T-G-G-C-GC-A--C--G-GG--T--G-C-G-T-A-AC-G-C-G-T-G-GG---A-A-T-CT-G--C-C-CTT--GG-G----T-T-C-G-G-A---AT-AA-C--TC------------------G-C-C-…
>ICSZ4EG01AE4ZL
A-T-T--G-A-A-C-G-C--T-G-G-C--G-G--C-A-T-G---C---C-T--TA-C--AC-A-T-G-C--A-A-G--T-C--GA-A-CG-----------G-TAA--C-G--G-----------------------------------G-TCC--------------------TTCGG---------------------------G--A--T---------------------------G-C-C----G--AC--G-------AG-T-G-G-C-GA-A--C--G-GG--T--G-A-G-T-A-AT-A-C-A-T-C-GG---A-A-C-GT-G--C-C-CGA--TC-G----T-G-G-G-G-G---AT-AA-C--GA------------------A-G-C-…
>ICSZ4EG01EAMQW
A-T-T--G-A-A-C-G-C--T-G-G-C--G-G--C-A-T-G---C---C-T--TA-C--AC-A-T-G-C--A-A-G--T-C--GA-A-CG-----------G-TA-----A--C---------------------------------G-G-G----------------------TCC-T---------------------------T--C--G-G-------------------------G-A-T----GCCGAC-G-------AG-T-G-G-C-GA-A--C--G-GG--T--G-A-G-T-A-AT-A-T-A-T-C-GG---A-A-C-GT-G--C-C-CAG--TA-G----T-G-G-G-G-G---AT-AA-C--TG------------------C-T-C-…
>ICSZ4EG01APJOW
A-T-T--G-A-A-C-G-C--T-G-G-C--G-G--C-A-T-G---C---C-T--TA-C--AC-A-T-G-C--A-A-G--T-C--GA-A-CG-----------G-TA-----A--C---------------------------------G-G-G----------------------TC--C---------------------------T--T--C-G-------------------------G-G-T----GCCGAC-G-------AG-T-G-G-C-GA-A--C--G-GG--T--G-A-G-T-A-AT-A-T-A-T-C-GG---A-A-C-GT-G--C-C-CAG--TA-G----T-G-G-G-G-G---AT-AA-C--TG------------------C-T-C-…
>ICSZ4EG01DET7A
A-T-T--G-A-A-C-G-C--T-G-G-C--G-G--C-A-T-G---C---T-T--TA-C--AC-A-T-G-C--A-A-G--T-C--GA-A-CG-----------G-TAA--C-A--G---------------------------------G-G-T-G--------------------CTT-G---------------------------C--A--C-C-------------------------G-C-T----G--AC--G-------AG-T-G-G-C-GA-A--C--G-GG--T--G-A-G-T-A-AT-G-C-A-T-C-GG---A-A-C-GT-A--C-C-CAG--TC-G----T-G-G-G-G-G---AT-AA-C--GT------------------A-G-C-…
>ICSZ4EG01CCUFW
A-T-T--G-A-A-C-G-C--T-G-G-C--G-G--C-A-T-G---C---C-T--TA-C--AC-A-T-G-C--A-A-G--T-C--GA-A-CG-----------G-TA-----A--C---------------------------------A-G-G-T--------------------CTT-C---------------------------G--G--A-T-------------------------G-C-T----G--AC--G-------AG-T-G-G-C-GA-A--C--G-GG--T--G-A-G-T-A-AT-A-C-A-T-C-GG---A-A-C-GT-G--C-C-CAG--AC-G----T-G-G-G-G-G---AT-AA-C--GA------------------G-G-C-…
>ICSZ4EG01C15KF
G-A-C--G-A-A-C-G-C--T-G-G-C--G-G--C-G-T-G---C---T-T--AA-C--AC-A-T-G-C--A-A-G--T-C--GA-A-CG-A---------G-A-----------------------------------------------C-C--------------------TTC-G---------------------------G--G------------------------------------------TC--T-------AG-T-G-G-C-GC-A--C--G-GG--T--G-C-G-T-A-AC-G-C-G-T-G-GG---A-A-T-CT-G--C-C-CTT--GG-G----T-T-C-G-G-A---AT-AA-C--TC------------------G-C-C-…
>ICSZ4EG01BM8YA
A-T-T--G-A-A-C-G-C--T-G-G-C--G-G--C-A-T-G---C---C-T--TA-C--AC-A-T-G-C--A-A-G--T-C--GA-A-CG-----------G-TAA--C-A--G-----------------------------------G-T-C--------------------TTC-G---------------------------G--A--T---------------------------G-C-T----G--AC--G-------AG-T-G-G-C-GA-A--C--G-GG--T--G-A-G-T-A-AT-A-C-A-T-C-GG---A-A-C-GT-G--C-CCAGA---C-G----T-G-G-G-G-G---AT-AA-C--GA------------------G-G-C-…
>ICSZ4EG01A68QP
A-T-T--G-A-A-C-G-C--T-G-G-C--G-G--C-A-T-G---C---C-T--TA-C--AC-A-T-G-C--A-A-G--T-C--GA-A-CG-----------G-TAA--C-G--G-----------------------------------G-TCC--------------------TTCGG---------------------------G--A--T---------------------------G-C-C----G--AC--G-------AG-T-G-G-C-GA-A--C--G-GG--T--G-A-G-T-A-AT-A-T-A-T-C-GG---A-A-C-GT-G--C-C-CAG--TA-G----T-G-G-G-G-G---AT-AA-C--TG------------------C-T-C-…
>ICSZ4EG01EZN36
A-T-T--G-A-A-C-G-C--T-G-G-C--G-G--C-A-T-G---C---C-T--TA-C--AC-A-T-G-C--A-A-G--T-C--GA-A-CG-----------G-TAA--C-A--G-----------------------------------G-T-C--------------------TTC-G---------------------------G--A--T---------------------------G-C-T----G--AC--G-------AG-T-G-G-C-GA-A--C--G-GG--T--G-A-G-T-A-AT-A-C-A-T-C-GG---A-A-C-GT-G--C-C-CGA--TC-G----T-G-G-G-G-G---AT-AA-C--G-------------------A-G-C-…
>ICSZ4EG01EXDK9
A-T-T--G-A-A-C-G-C--T-G-G-C--G-G--C-A-T-G---C---C-T--TA-C--AC-A-T-G-C--A-A-G--T-C--GA-A-CG-----------G-TA-----A--C---------------------------------G-G-G----------------------TCC-T---------------------------T--C--G-G-------------------------G-A-TACC-G--AC--G-------AG-T-G-G-C-GA-A--C--G-GG--T--G-A-G-T-A-AT-A-T-A-T-C-GG---A-A-C-GT-G--C-C-CAG--TA-G----T-G-G-G-G-G---AT-AA-C--TG------------------C-T-C-…
>ICSZ4EG01EWSVN
A-T-T--G-A-A-C-G-C--T-G-G-C--G-G--C-A-T-G---C---C-C--TA-C--AC-G-T-G-C--A-A-G--T-C--GA-A-CG-----------G-TA-----A--C---------------------------------G-G-G----------------------CCC-T---------------------------T--C--G-G-------------------------G-A-T----GCCGAC-G-------AG-T-G-G-C-GA-A--C--G-GG--T--G-A-G-T-A-AT-A-T-A-T-C-GG---A-A-C-GT-G--C-C-CAG--TA-G----T-G-G-G-G-G---AT-AA-C--TG------------------C-T-C-…
>ICSZ4EG02F4CCS
A-T-T--G-A-A-C-G-C--T-G-G-C--G-G--C-A-T-G---C---C-T--TA-C--AC-A-T-G-C--A-A-G--T-C--GA-A-CG-----------G-TAA--C-A--G-----------------------------------G-T-C--------------------TTC-G---------------------------G--A--T---------------------------G-C-T----G--AC--G-------AG-T-G-G-C-GA-A--C--G-GG--T--G-A-G-T-A-AT-A-C-A-T-C-GG---A-A-C-GT-G--C-C-CGA--TC-G----T-G-G-G-G-G---AT-AA-C--GA------------------G-G-C-…
>ICSZ4EG01ERNW1
G-A-T--G-A-A-C-G-C--T-A-G-C--G-G--G-A-G-G---C---C-T--AA-C--AC-A-T-G-C--A-A-G--C-C--GA-A-CG-A---------G-A-----------------------------------------------C-C--------------------TTC-G---------------------------G--G------------------------------------------TC--T-------AG-T-G-G-C-GC-A--C--G-GG--T--G-C-G-T-A-AC-G-C-G-T-G-GG---A-A-T-CT-G--C-C-CTT--GG-G----C-T-C-G-G-A---AT-AA-T--TC------------------G-C-C-…
>ICSZ4EG01EN720
G-ATT--G-A-A-C-G-C--T-G-G-C--G-G--C-G-T-G---C---T-T--AA-C--AC-A-T-G-C--A-A-G--T-C--GA-A-CG-----------G-AA---A-G--G-----------------------------C-C-C-T-G-C--------------------TTT-T---------------------------G--T--G-G-G-G-----------------------T-G----C--TC--G-------AG-T-G-G-C-GA-A--T--G-GG--T--G-A-G-T-A-AC-A-C-G-T-G-AG---TAA-C-CT-G--C-C-CTT--GA-C----T-T-T-G-G-G---AT-AA-C--TT------------------C-A-G-…
>ICSZ4EG01EB2AB
A-T-T--G-A-A-C-G-C--T-G-G-C--G-G--C-A-T-G---C---C-T--TA-C--AC-A-T-G-C--A-A-G--T-C--GA-A-CG-----------G-TA-----A--C---------------------------------G-G-G----------------------TCC-T---------------------------T--C--G-G-------------------------G-A-T----GCCGAC-G-------AG-T-G-G-C-GA-A--C--G-GG--T--G-A-G-T-A-AT-A-T-A-T-C-GG---A-A-C-GT-G--C-C-CAG--TA-G----T-G-G-G-G-G---AT-AA-C--TG------------------C-T-C-…
>ICSZ4EG01EAN59
G-ATT--G-A-A-C-G-C--T-G-G-C--G-G--C-A-T-G---C---C-T--TA-C--AC-A-T-G-C--A-A-G--T-C--GA-A-CG-----------G-AA---A-G--G-----------------------------C-T-C-C-T-G--------------------CTT-G---------------------------C--A--G-G-G-G-----------------------T-A----C--TC--G-------AG-T-G-G-C-GA-A--C--G-GG--T--G-A-G-T-A-AC-A-C-G-T-G-GG---TGA-T-CT-G--C-C-TTG--TA-C----T-C-T-G-G-G---AT-AA-G--CT------------------T-G-G-…
>ICSZ4EG01DZXLO
G-A-T--G-A-A-C-G-C--T-A-G-C--G-G--G-A-G-G---C---C-T--AA-C--AC-A-T-G-C--A-A-G--C-C--GA-G-CG-G---------T-A----T-T--G---------------------------------T-T-T-C--------------------TTC-G---------------------------G--A--A-A---------------------------T-G----A--GA--G-------AG-C-G-G-C-GT-A--C--G-GG--T--G-C-G-G-A-AC-A-C-G-T-G-TG---CAA-C-CT-A--C-C-TTT--AT-C----T-G-G-G-G-G---AT-AG-C--CT------------------T-T-C-…
>ICSZ4EG01DZBZN
G-A-G--G-A-A-C-GACG-C-G-G-C--G-G--C-G-T-G---C---T-T--AA-C--AC-A-T-G-C--A-A-G--T-C--GA-A-CG-----------G-AA---A-G--G-----------------------------C-C-C-T-G-C--------------------TTT-T---------------------------G--T--G-G-G-G-----------------------T-G----C--TC--G-------AG-T-G-G-C-GA-A--C--G-GG--T--G-A-G-T-A-AC-A-C-G-T-G-AG---TAA-C-CT-G--C-C-CTT--GA-C----T-T-T-G-G-G---AT-AA-C--TT------------------C-A-G-…
>ICSZ4EG01DY945
G-A-T--G-A-A-C-G-C--T-A-G-C--G-G--G-A-G-G---C---C-T--AA-C--AC-A-T-G-C--A-A-G--C-C--GA-G-CG-G---------T-A----T-T--G---------------------------------T-T-T-C--------------------TTC-G---------------------------G--A--A-A---------------------------T-G----A--GA--G-------AG-C-G-G-C-GT-A--C--G-GG--T--A-C-G-G-A-AC-A-C-G-T-G-TG---CAA-C-CT-G--C-C-CTT--AT-C----T-G-G-G-G-G---AT-AG-C--CT------------------T-T-C-…
>ICSZ4EG01DY0GA
G-ATT--G-A-A-C-G-C--T-A-G-C--G-G--G-A-G-G---C---C-T--AA-C--AC-A-T-G-C--A-A-G--C-C--GA-G-CG-G---------T-A----T-T--G---------------------------------T-T-T-C--------------------TTC-G---------------------------G--A--A-A---------------------------T-G----A--GA--G-------AG-C-G-G-C-GT-A--C--G-GG--T--G-C-G-G-A-AC-A-C-G-C-G-TG---CAA-C-CT-G--C-C-TTT--AT-CG---T-G-G-G-G-G---AT-AG-C--CT------------------T-T-C-…
>ICSZ4EG01DWU2H
A-T-T--G-A-A-C-G-C--T-G-G-C--G-G--C-A-T-G---C---C-T--TA-C--AC-A-T-G-C--A-A-G--T-C--GA-A-CG-----------G-TA-----A--C---------------------------------G-G-G----------------------TCC-T---------------------------T--C--G-G-------------------------G-A-T----GCCGC--G-------AG-T-G-G-C-GA-A--C--G-GG--T--G-A-G-T-A-AT-A-T-A-T-C-GG---A-A-C-GT-G--C-C-CAG--TA-G----T-G-G-G-G-G---AT-AA-C--TG------------------C-T-C-…
>ICSZ4EG01DS1W9
G-A-T--G-A-A-C-G-C--T-A-G-C--T-A--C-A-G-G---C---T-T--AA-C--AC-A-T-G-C--A-A-G--T-C--GA-G-GG-----------G-CAG--C-A--T----------------G-----------TC-G-G-T-T-G--------------------CTT-G---------------------------C--A--A-C-C-G--AT-----------------G-A-T----G--GC--G-------AC-C-G-G-C-GC-A--C--G-GG--T--G-A-G-T-A-AC-G-C-G-T-A-TC---CAA-C-CT-G--C-CTCTT---A-C----C-A-G-G-G-A---AT-AA-C--CC------------------G-T-C-…
>ICSZ4EG01DR4IE
A-T-T--G-A-A-C-G-C--T-G-G-C--G-G--C-A-T-G---C---C-T--TA-C--AC-A-T-G-C--A-A-G--T-C--GA-A-CG-----------G-TAA--C-G--G-----------------------------------G-TCC--------------------TTCGG---------------------------G--A--T---------------------------G-C-C----G--AC--G-------AG-T-G-G-C-GA-A--C--G-GG--T--G-A-G-T-A-AT-A-T-A-T-C-GG---A-A-C-GT-G--C-C-CAG--TA-G----T-G-G-G-G-G---AT-AA-C--TG------------------C-T-C-…
>ICSZ4EG01DOGF4
A-C-T--G-A-A-C-G-C--T-G-G-C--G-G--C-A-T-G---C---C-T--TA-C--AC-A-T-G-C--A-A-G--T-C--GA-ACGGTAACGG-----G-T-----------------------------------------------C-C--------------------TTC-G---------------------------G--GA------------------------------------TGCCGAC--G-------AG-T-G-G-C-GA-A--C--G-GG--T--G-C-G-T-A-AC-G-C-G-T-G-GG---A-A-T-CT-G--C-C-CTT--GG-G----T-T-C-G-G-A---AT-AA-C--TC------------------G-C-C-…
>ICSZ4EG01DQLP6
G-A-T--G-A-A-C-G-C--T-G-G-C--G-G--C-G-T-G---C---T-T--AA-C--AC-A-T-G-C--A-A-G--T-C--GA-A-CG-G---------A-G----T-T--A---------ATTTGA-G-----------GA-A-GCAAG-C------------------TTGCT-T---------------------------G--A----A-G-A--A-T--TGAAT-----------T-A----A--CT--T-------AG-T-G-G-C-GG-A--C--G-GG--C--G-A-G-T-A-AC-A-C-G-T-G-AG---CAA-C-CT-G--C-CTCT---TA-C----A-G-G-G-G-A---AT-AA-C--AA------------------C-G-G-…
>ICSZ4EG01DMLY6
A-A-C--G-A-A-C-G-C--T-G-G-C--G-G--C-A-T-G---C---C-T--AA-C--AC-A-T-G-C--A-A-G--T-C--GA-A-CG-A---------G-A-----------------------------------------------C-C--------------------TTC-G---------------------------G--G------------------------------------------TC--T-------AG-T-G-G-C-GC-A--C--G-GG--T--G-C-G-T-A-AC-G-C-G-T-G-GG---A-A-T-CT-G--C-C-CTT--GG-G----T-T-C-G-G-A---AT-AA-C--TC------------------G-C-C-…
>ICSZ4EG02H02PX
A-T-T--G-A-A-C-G-C--T-G-G-C--G-G--C-A-T-G---C---C-T--TA-C--AC-A-T-G-C--A-A-G--T-C--GA-A-CG-----------G-TA-----A--C---------------------------------A-G-G-T--------------------CTT-C---------------------------G--G--A-T-------------------------G-C-T----G--AC--G-------AG-T-G-G-C-GA-A--C--G-GG--T--G-A-G-T-A-AT-A-C-A-T-C-GG---A-A-C-GT-G--C-C-CAG--AC-G----T-G-G-G-G-G---AT-AA-C--TG------------------C-T-C-…
>ICSZ4EG01DKZJ6
A-T-T--G-A-A-C-G-C--T-G-G-C--G-G--C-A-T-G---C---C-T--TA-C--AC-A-T-G-C--A-A-G--T-C--GA-A-CG-----------G-TAA--CAA--G-------------------------------------T-C--------------------TTC-G---------------------------G--A--T---------------------------G-C-T----G--AC--G-------AG-T-G-G-C-GA-A--C--G-GG--T--G-A-G-T-A-AT-A-C-A-T-C-GG---A-A-C-GT-G--C-C-CGA--TC-G----T-G-G-G-G-G---AT-AA-C--GA------------------G-G-C-…
>ICSZ4EG01DHJFU
A-T-T--G-A-A-C-G-C--T-G-G-C--G-G--C-A-T-G---C---C-T--TA-C--AC-A-T-G-C--A-A-G--T-C--GA-A-CG-----------GCAGCA-C-G--G-----------------------------------G-A-G--------------------CAA-T---------------------------C--C--T---------------------------G-G-T----G--GC--G-------AG-T-G-G-C-GA-A--C--G-GG--T--G-A-G-T-A-AT-A-C-A-T-C-GG---A-A-C-GT-G--C-C-CGA--TC-G----T-G-G-G-G-G---AT-AA-C--GA------------------A-G-C-…
>ICSZ4EG01DE2LD
A-A-C--G-A-A-C-G-C--T-G-G-C--G-G--C-A-T-G---C---C-T--AA-C--AC-A-T-G-C--A-A-G--T-C--GA-G-CG-A---------G-A-----------------------------------------------C-C--------------------TCC-G---------------------------G--G------------------------------------------TC--T-------AG-T-G-G-C-GC-A--C--G-GG--T--G-C-G-T-A-AC-G-C-G-T-G-GG---A-A-C-CT-G--C-C-CTT--GG-G----T-T-C-G-G-A---AT-AA-C--TC------------------G-C-C-…
>ICSZ4EG01D8GP3
G-T-T--G-A-A-C-G-C--T-G-G-C--G-G--C-A-T-G---C---C-T--TA-C--AC-A-T-G-C--A-A-G--T-C--GA-A-CG-----------G-TA-----A--C---------------------------------G-G-G----------------------TCC-T---------------------------T--C--G-G-------------------------G-A-T----GCCGAC-G-------AG-T-G-G-C-GA-A--C--G-GG--T--G-A-G-T-A-AT-A-T-A-T-C-GG---A-A-C-GT-G--C-C-CAG--TA-G----T-G-G-G-G-G---AT-AA-C--TG------------------C-T-C-…
>ICSZ4EG01D7RE4
A-A-C--G-A-A-C-G-C--T-G-G-C--G-G--C-A-T-G---C---C-T--AA-C--AC-A-T-G-C--A-A-G--T-C--GA-A-CG-A---------G-G-----------------------------------------------C-C--------------------TTC-G---------------------------G--G------------------------------------------TC--T-------AG-T-G-G-C-GC-G--C--G-GG--T--G-C-G-T-A-AC-G-C-G-T-G-GG---A-A-T-CT-G--C-C-CTT--GG-G----T-T-C-G-G-A---AT-AA-C--TC------------------G-C-C-…
>ICSZ4EG01D67LX
A-T-T--G-A-A-C-G-C--T-G-G-C--G-G--C-A-T-G---C---C-T--TA-C--AC-A-T-G-C--A-A-G--T-C--GA-A-CG-----------G-TA-----A--T---------------------------------G-G-G----------------------TCC-T---------------------------T--C--G-G-------------------------G-A-T----GCCGAC-G-------AG-T-G-G-C-GA-A--C--G-GG--T--G-A-G-T-A-AT-A-T-A-T-C-GG---A-A-C-GT-G--C-C-CAG--TA-G----T-G-G-G-G-G--AGT-AA-C--TG------------------C-T-C-…
>ICSZ4EG01D3UWY
G-A-T--G-G-A-C-G-C--T-A-G-C--G-G--G-A-G-G---C---C-C--AA-C--AC-A-T-G-C--A-A-G--C-C--GA-G-CG-G---------T-A----T-T--G---------------------------------T-T-T-C--------------------TTC-G---------------------------G--A--A-A---------------------------T-G----A--GA--G-------AG-C-G-G-C-GT-A--C--G-GG--T--G-C-G-G-A-AC-A-C-G-T-G-TG---CAA-C-CT-G--C-C-TTT--AT-C----T-G-G-G-G-G---AT-AG-C--CT------------------T-T-C-…
>ICSZ4EG01D3PRX
A-A-C--G-A-A-C-G-C--T-G-G-C--G-G--C-A-T-G---C---C-T--AA-C--AC-A-T-G-C--A-A-G--C-C--GA-G-CG-G---------T-A----T-T--G---------------------------------T-T-T-C--------------------TTC-G---------------------------G--A--A-A---------------------------T-G----A--GA--G-------AG-C-G-G-C-GT-A--C--G-GG--T--G-C-G-G-A-AC-A-C-G-T-G-TG---CAA-C-CT-G--C-C-TTT--AT-C----T-G-G-G-G-G---AT-AG-C--CT------------------T-T-C-…
>ICSZ4EG01D06YC
A-T-T--G-A-A-C-G-C--T-G-G-C--G-G--C-A-T-G---C---C-T--TA-C--AC-A-T-G-C--A-A-G--T-C--GA-A-CG-----------G-TAA--C-G--G-----------------------------------G-TCC--------------------TTCGG---------------------------G--A--T---------------------------G-C-C----G--AC--G-------AG-T-G-G-C-GA-A--C--G-GG--T--G-A-G-T-A-AT-A-T-A-T-C-GG---A-A-C-GT-G--C-C-CAG--TA-G----T-G-G-G-G-G---AT-AA-C--TG------------------C-T-C-…
>ICSZ4EG01CZMYC
A-T-T--G-A-A-C-G-C--T-G-G-C--G-G--C-A-T-G---C---C-T--TA-C--AC-A-T-G-C--A-A-G--T-C--GA-A-CG-----------G-TAA--C-A--G---------------------------------G-T-C-C--------------------TTT-G---------------------------G--G--A-T-------------------------G-C-C----G--AC--G-------AG-T-G-G-C-GA-A--C--G-GG--T--G-A-G-T-A-AT-A-T-A-T-C-GG---A-A-C-GT-G--C-C-CAG--TA-G----T-G-G-G-G-G---AT-AA-C--TG------------------C-T-C-…
>ICSZ4EG01CYV5J
A-T-T--G-A-A-C-G-C--T-G-G-C--G-G--C-A-T-G---T---C-T--TA-C--AC-A-T-G-C--A-A-G--T-C--GA-A-CG-----------G-TAA--CGG--G-------------------------------------TCC--------------------TTCGG---------------------------G--A--T---------------------------G-C-C----G--AC--G-------AG-T-G-G-C-GA-A--C--G-GG--T--G-A-G-T-A-AT-A-T-A-T-C-GG---A-A-C-GT-G--C-C-CAG--TA-G----T-G-G-G-G-G---AT-AA-C--GA------------------G-G-C-…
>ICSZ4EG01CXH99
G-A-T--G-A-A-C-G-C--T-G-G-C--G-G--C-G-T-G---C---T-T--AA-C--AC-A-T-G-C--A-A-G--T-C--GA-A-CG-GA--------G-C----T----A---------ATTTGA-G-----------GA-A-GCAAG-C------------------TTGCT-T---------------------------G--A----A-G-A--A-T--TGAAT-----------T-A----A--CT--T-------AG-T-G-G-C-GG-A--C--G-GG--C--G-A-G-T-A-AC-A-C-G-T-G-AG---CAA-C-CT-G--C-CTCT---TA-C----A-G-G-G-G-A---AT-AA-C--AA------------------C-G-G-…
>ICSZ4EG01CTYEY
A-A-C--G-A-A-C-G-C--T-G-G-C--G-G--C-A-T-G---C---C-T--AA-C--AC-A-T-G-C--A-A-G--T-C--GA-A-CG-----------G-TAA--C-A--G-----------------------------------G-T-C--------------------TTC-G---------------------------G--A--T---------------------------G-C-T----G--AC--G-------AG-T-G-G-C-GA-A--C--G-GG--T--G-A-G-T-A-AT-A-C-A-T-C-GG---A-A-C-GT-G--C-C-CGA--TC-G----T-G-G-G-G-G---AT-AA-C--GA------------------G-G-C-…
>ICSZ4EG01ASZ68
A-T-T--G-A-A-C-G-C--T-G-G-C--G-G--C-A-T-G---C---C-T--TA-C--AC-A-T-G-C--A-A-G--T-C--GA-A-CG-----------G-TAA--C-A--G-----------------------------------G-T-C--------------------TTC-G---------------------------G--A--T---------------------------G-C-T----G--AC--G-------AG-T-G-G-C-GA-A--C--G-GG--T--G-A-G-T-A-AT-A-C-A-T-C-GG---A-A-C-GT-G--C-CCAGA---C-G----T-G-G-G-G-G---AT-AA-C--GA------------------G-G-C-…
>ICSZ4EG01CSJ5Q
A-T-T--G-A-A-C-G-C--T-G-G-C--G-G--C-A-T-G---C---C-T--TA-C--AC-A-T-G-C--A-A-G--T-C--GA-A-CG-----------G-TAA--C-A------------------------------------G-G-T-C--------------------TTC-G---------------------------G--G--A-T-------------------------G-C-C----G--AC--G-------AG-T-G-G-C-GA-A--C--G-GG--T--G-A-G-T-A-AT-A-C-A-T-C-GG---A-A-C-GT-G--C-C-CAG--TA-G----T-G-G-G-G-G---AT-AA-C--TG------------------C-T-C-…
>ICSZ4EG01COZMR
A-A-C--G-A-A-C-G-C--T-G-G-C--G-G--C-A-T-G---C---C-T--AA-C--AC-A-T-G-C--A-G-G--T-C--GA-A-CG-----------G-TA-----A--C---------------------------------G-G-G----------------------TCC-T---------------------------T--C--G-G-------------------------G-A-T----GCCGAC-G-------AG-T-G-G-C-GA-A--C--G-GG--T--G-A-G-T-A-AT-A-T-A-T-C-GG---A-A-C-GT-G--C-C-CAG--TA-G----T-G-G-G-G-G---AT-AA-C--TG------------------C-T-C-…
>ICSZ4EG01CMJ99
A-A-C--G-A-A-C-G-C--T-G-G-C--G-G--C-A-T-G---C---C-T--AA-C--AT-A-T-G-C--A-A-G--T-C--GA-A-CG-G---------G-A-----------------------------------------------C-C--------------------TTC-G---------------------------G--G------------------------------------------TC--T-------GG-T-G-G-C-GC-A--C--G-GG--T--G-C-G-T-A-AC-G-C-G-T-G-GG---A-A-T-CT-G--C-C-CTT--GG-G----T-C-C-G-G-A---AT-AA-C--TC------------------G-C-C-…
>ICSZ4EG01CKGU1
A-A-C--G-A-A-C-G-C--T-G-G-C--G-G--C-A-T-G---C---C-T--TA-C--AC-A-T-G-C--A-A-G--T-C--GA-A-CG-----------G-AA---A-G--G-----------------------------C-T-C-C-T-G--------------------CTT-G---------------------------C--A--G-G-G-G-----------------------T-A----C--TC--G-------AG-T-G-G-C-GA-A--C--G-GG--T--G-A-G-T-A-AC-A-C-G-T-G-GG---TGA-T-CT-G--C-C-TTG--TA-C----T-C-T-G-G-G---AT-AA-G--CT------------------T-G-G-…
>ICSZ4EG01CKG3G
A-A-C--G-A-A-C-G-C--T-G-G-C--G-G--C-A-T-G---C---C-T--AA-C--AC-A-T-G-C--A-A-G--T-C--GA-A-CG-----------G-AA---A-G--G-----------------------------C-C-C-T-G-C--------------------TTT-T---------------------------G--T--G-G-G-G-----------------------T-G----C--TC--G-------AG-T-G-G-C-GA-A--C--G-GG--T--G-A-G-T-A-AC-A-C-G-T-G-AG---TAA-C-CT-G--C-C-CTT--GA-C----T-T-T-G-G-G---AT-AA-C--TT------------------C-A-G-…
>ICSZ4EG01CISRY
A-A-C--G-A-A-C-G-C--T-G-G-C--G-G--C-A-T-G---C---C-T--TA-C--AC-A-T-G-C--A-A-G--T-C--GA-A-CG-----------G-TAA--C-G--------------------------------------G-G-T--------------------CCT-T---------------------------CGGGA-T---------------------------G-C-C----G--AC--G-------AG-T-G-G-C-GA-A--C--G-GG--T--G-A-G-T-A-AT-A-T-A-T-C-GG---A-A-C-GT-G--C-C-CAG--TA-G----T-G-G-G-G-G---AT-AA-C--TG------------------C-T-C-…
>ICSZ4EG01CIRLF
A-T-T--G-A-A-C-G-C--T-G-G-C--G-G--C-A-T-G---C---C-T--TA-C--AC-A-T-G-C--A-A-G--T-C--GA-A-CG-----------G-TAA--C-A--G-----------------------------------G-T-C--------------------TTC-G---------------------------G--A--T---------------------------G-C-T----G--AC--G-------AG-T-G-G-C-GA-A--C--G-GG--T--G-A-A-T-A-AT-A-C-A-T-C-GG---A-A-C-GT-G--C-C-CGA--TC-G----T-G-G-G-G-A---GT-AA-C--GA------------------G-G-C-…
>ICSZ4EG01ARGX0
T---T--G-A-A-C-G-C--T-G-G-C--G-G--C-A-T-G---C---C-T--TA-C--AC-A-T-G-C--A-A-G--T-C--GA-A-CG-----------G-TAA--C-G--G-----------------------------------G-TCC--------------------TTCGG---------------------------G--A--T---------------------------G-C-C----G--AC--G-------AG-T-G-G-C-GA-A--C--G-GG--T--G-A-G-T-A-AT-A-C-A-T-C-GG---A-A-C-GT-G--C-C-CGA--TC-G----T-G-G-G-G-G---AT-AA-C--GA------------------G-G-C-…
>ICSZ4EG01CC9P1
A-T-T--G-A-A-C-G-C--T-G-G-C--G-G--C-A-T-G---C---C-T--TA-C--AC-A-T-G-C--A-A-G--T-C--GA-A-CG-----------G-TA-----A--C---------------------------------G-G-G----------------------TCC-T---------------------------T--C--G-G-------------------------G-A-T----GCCGAC-G-------AG-T-G-G-C-GA-A--C--G-GG--T--G-A-G-T-A-AT-A-T-A-T-C-GG---A-A-C-GT-G--C-C-CAG--CA-G----T-G-G-G-G-G---AT-AA-C--TG------------------C-T-C-…
>ICSZ4EG01C8LCX
A-A-C--G-A-A-C-G-C--T-G-G-C--G-G--C-A-T-G---C---C-T--AA-C--AC-A-T-G-C--A-A-G--T-C--GA-A-CG-A---------G-A-----------------------------------------------C-C--------------------TTC-G---------------------------G--G------------------------------------------TC--T-------AG-T-G-G-C-GC-A--C--G-GG--T--G-C-G-T-A-AC-G-C-G-T-G-GG---A-A-T-CT-G--C-C-CTTC-GG-G----T-T-C-G-G-A--ATTAAA-C--TC------------------G-C-CG…
>ICSZ4EG01C8IX3
A-T-T--G-A-A-C-G-C--T-G-G-C--G-G--C-A-T-G---C---C-T--TA-C--AC-A-T-G-C--A-A-G--T-C--GA-A-CG-----------G-TA-----A--C---------------------------------G-G-G----------------------TCC-T---------------------------T--C--G-G-------------------------G-A-T----GCCGAC-G-------AG-T-G-G-C-GA-A--C--G-GG--T--G-A-G-T-A-AT-A-T-A-T-C-GG---A-A-C-GT-G--C-C-CAG--TA-G----T-G-G-G-G-G---AT-AA-C--TG------------------C-T-C-…
>ICSZ4EG01C6KAU
A-T-T--G-A-A-C-G-C--T-G-G-C--G-G--C-A-T-G---C---C-T--TA-C--AC-A-T-G-C--A-A-G--T-C--GA-A-CG-----------G-TAA--C-G--G-----------------------------------G-TCC--------------------TTCGG---------------------------G--A--T---------------------------G-C-C----G--AC--G-------AG-T-G-G-C-GA-A--C--G-GG--T--G-A-G-T-A-AT-A-T-A-T-C-GG---A-A-C-GT-G--C-CCAGA---C-G----T-G-G-G-G-G---AT-AA-C--GA------------------G-G-C-…
>ICSZ4EG01C638Y
A-T-T--G-A-A-C-G-C--T-G-G-C--G-G--C-G-T-G---C---C-T--TA-C--AC-A-T-G-C--A-A-G--T-C--GA-A-CG-----------G-TA-----A--C---------------------------------G-G-G-G--------------------TCC-T---------------------------T--C--G-G-------------------------GAG-T----GCCGAC-G-------AG-T-G-G-C-GA-A--C--G-GG--T--G-A-G-T-A-AT-A-T-A-T-C-GG---A-A-C-GT-G--C-C-CAG--TA-G----T-G-G-G-G-G---AT-AA-C--TG------------------C-T-C-…
>ICSZ4EG01C381O
A-T-T--G-A-A-C-G-C--T-G-G-C--G-G--C-A-T-G---C---C-T--TA-C--AC-A-T-G-C--A-A-G--T-C--GA-A-CG-----------G-TAA--C-A--G-----------------------------------G-T-C--------------------TTC-G---------------------------G--A--T---------------------------G-C-T----G--AC--G-------AG-T-G-G-C-GA-A--C--G-GG--T--G-A-G-T-A-AT-A-C-A-T-C-GG---A-A-C-GT-G--C-C-C-G-ATC-G----T-G-G-G-G-G---AT-AA-C--GA------------------A-G-C-…
>ICSZ4EG01BVKE9
G-A-T--G-A-A-C-G-C--T-A-G-C--G-G--G-A-G-G---C---C-T--AA-C--AC-A-T-G-C--A-A-G--C-C--GA-G-CG-G---------T-A----T-T--G---------------------------------C-T-T-C--------------------TTC-G---------------------------G--A--A-A---------------------------T-G----A--GA--G-------AG-C-G-G-C-GT-A--C--G-GG--T--G-C-G-G-A-AC-A-C-G-T-G-TG---CAA-C-CT-G--C-C-TTT--AT-C----T-G-G-G-G-G---AT-AG-C--CT------------------T-T-C-…
>ICSZ4EG01BVIPU
A-T-T--G-A-A-C-G-C--T-G-G-C--G-G--C-A-T-G---C---C-T--TA-C--AC-A-T-A-C--A-A-G--T-C--GA-A-CG-----------G-TA-----A--C---------------------------------G-G-G----------------------TCC-T---------------------------T--C--G-G-------------------------G-A-T----GCCGAC-A-------AG-T-G-G-C-GA-A--C--G-GG--T--G-G-G-T-A-AT-A-T-A-T-C-GG---A-A-C-GT-G--C-C-CAG--TA-G----T-G-G-G-G-G---AT-AA-C--TG------------------C-T-C-…
>ICSZ4EG01BTPLH
A-A-C--G-A-A-C-G-C--T-G-G-C--G-G--C-A-T-G---C---C-T--TA-C--AC-A-T-G-C--A-A-G--T-C--GA-A-CG-----------G-TAA--C-A--G-----------------------------------G-T-C--------------------TTC-G---------------------------G--A--T---------------------------G-C-T----G--AC--G-------AG-T-G-G-C-GA-A--C--G-GG--T--G-A-G-T-G-AT-A-C-A-T-C-GG---A-A-C-GT-G--C-CCAGA---C-G----T-G-G-G-G-G---AT-AA-C--GA------------------G-G-C-…
>ICSZ4EG01BTKEH
G-A-T--G-A-A-C-G-C--T-A-G-C--G-G--G-A-G-G---C---C-T--AA-C--AC-A-T-G-C--A-A-G--T-C--GA-A-CG-A---------G-A-----------------------------------------------C-C--------------------TTC-G---------------------------G--G------------------------------------------TC--T-------AG-T-G-G-C-GC-A--C--G-GG--T--G-C-G-T-A-AC-G-C-G-T-G-GG---A-A-T-CT-G--C-C-CTT--GG-G----T-T-C-G-G-A---AT-AA-C--TC------------------G-C-C-…
>ICSZ4EG01BSF9X
A-T-T--G-A-A-C-G-C--T-G-G-C--G-G--C-A-T-G---C---C-T--TA-C--AC-A-T-G-C--A-A-G--T-C--GA-A-CG-----------G-TAA--C-A--G-----------------------------------G-T-C--------------------TTC-G---------------------------G--A--T---------------------------G-C-T----G--AC--G-------AG-T-G-G-C-GA-A--C--G-GG--T--G-A-G-T-A-AT-A-C-A-T-C-GG---A-A-C-GT-G--C-C-CGA--TC-G----T-G-G-G-G-G---AT-AA-C--GA------------------A-G-C-…
>ICSZ4EG01BS84M
A-A-C--G-A-A-C-G-C--T-G-G-C--G-G--C-A-T-G---T---C-T--TA-C--AC-A-T-G-C--A-A-G--T-C--GA-A-CG-----------G-TAA--C-A--G-----------------------------------G-T-C--------------------TTC-G---------------------------G--A--T---------------------------G-C-T----G--AC--G-------AG-T-G-G-C-GA-A--C--G-GG--T--G-A-G-T-A-AT-A-C-A-T-C-GG---A-A-C-GT-G--C-C-CGA--TC-G----T-G-G-G-G-G---AT-AA-C--GA------------------A-G-C-…
>ICSZ4EG01BRP9Y
A-T-T--G-A-A-C-G-C--T-G-G-C--G-G--C-G-T-G---C---T-T--AA-C--AC-A-T-G-C--A-A-G--T-C--GA-A-CG-A---------G-A-----------------------------------------------C-C--------------------TTC-G---------------------------G--G------------------------------------------TC--T-------AG-T-G-G-C-GC-A--C--G-GG--T--G-C-G-T-A-AC-G-C-G-T-G-GG---A-A-T-CT-G--C-C-CTT--GG-G----T-T-C-G-G-A---AT-AA-C--TC------------------G-C-C-…
>ICSZ4EG01BPR0N
A-T-T--G-A-A-C-G-C--T-G-G-C--G-G--C-A-T-G---C---C-T--TA-C--AC-A-T-G-C--A-A-G--T-C--GA-A-CG-----------G-TA-----A--C---------------------------------G-G-G----------------------TCC-T---------------------------T--C--G-G-------------------------G-A-T----GCCGAC-G-------AG-T-G-G-C-GA-A--C--G-GG--T--G-A-G-T-A-AT-A-T-A-T-C-GG---A-A-C-GT-G--C-C-CAG--TA-G----T-G-G-G-G-G---AT-AA-C--TG------------------C-T-C-…
>ICSZ4EG01BP4ZG
G-A-T--G-A-A-C-G-C--T-A-G-C--G-G--A-A-G-G---C---C-T--AA-C--AC-A-T-G-C--A-A-G--C-C--GA-G-CG-G---------T-A----T-T--G---------------------------------T-T-T-C--------------------TTC-G---------------------------G--A--A-A---------------------------T-G----A--GA--G-------AG-C-G-G-C-GT-A--C--G-GG--T--G-C-G-G-A-AC-A-C-G-T-G-TG---CAA-C-CT-G--C-C-TCT--AT-C----T-G-G-G-G-G---AT-AG-C--CT------------------T-T-C-…
>ICSZ4EG01BOQFC
A-T-T--G-A-A-C-G-C--T-G-G-C--G-G--C-A-T-G---C---C-T--TA-C--AC-A-T-G-C--A-A-G--T-C--GA-A-CG-----------G-TAA--C-G--G-----------------------------------G-TCC--------------------TTCGG---------------------------G--A--T---------------------------G-C-C----G--AC--G-------AG-T-G-G-C-GA-A--C--G-GG--T--G-A-G-T-A-AT-A-T-A-T-C-GG---A-A-C-GT-G--C-C-CAG--TA-G----T-G-G-G-G-G---AT-AA-C--TG------------------C-T-C-…
>ICSZ4EG01BN3FO
A-T-T--G-A-A-C-G-C--T-G-G-C--G-G--C-A-T-G---C---C-T--TA-C--AC-A-T-G-C--A-A-G--T-C--GA-A-CG-----------G-TA-----A--C---------------------------------G-G-G----------------------TCC-T---------------------------T--C--G-G-------------------------G-A-T----GCCGAC-G-------AG-T-G-G-C-GA-A--C--G-GG--T--G-A-G-T-A-AT-A-T-A-T-C-GG---A-A-C-GT-G--C-C-CAGTACCCCG---T-G-G-G-G-G---AT-AA-C--TG------------------C-T-C-…
>ICSZ4EG01BL5SZ
A-T-T--G-A-A-C-G-C--T-G-G-C--G-G--C-A-T-G---C---C-T--TA-C--AC-A-T-G-C--A-A-G--T-C--GA-A-CG-----------G-TAA--C-G--------------------------------------G-G-T--------------------CCT-T---------------------------CGGGA-T---------------------------G-C-C----G--AC--G-------AG-T-G-G-C-GA-A--C--G-GG--T--G-A-G-T-A-AT-A-T-A-T-C-GG---A-A-C-GT-G--C-C-CAG--TA-G----T-G-G-G-G-G---AT-AA-C--TG------------------C-T-C-…
>ICSZ4EG01BIBGD
A-A-C--G-A-A-C-G-C--T-A-G-C--G-G--G-A-G-G---C---C-T--AA-C--AC-A-T-G-C--A-A-G--C-C--GA-G-CG-G---------T-A----T-T--G---------------------------------T-T-T-C--------------------TTC-G---------------------------G--A--A-A---------------------------T-G----A--GA--G-------AG-C-G-G-C-GT-A--C--G-GG--T--G-C-G-G-A-AC-A-C-G-T-G-TG---CAA-C-CT-G--C-C-TTT--AT-C----T-G-G-G-G-G---AT-AG-C--CT------------------T-T-C-…
>ICSZ4EG01BHI8C
A---C--G-A-A-C-G-C--T-G-G-C--G-G--C-A-T-G---C---C-T--TA-C--AC-A-T-G-C--A-A-G--T-C--GA-A-CG-----------G-TA-----A--C---------------------------------G-G-G----------------------TCC-T---------------------------T--C--G-G-------------------------G-A-T----GCCGAC-G-------AG-C-G-G-C-GA-A--C--G-GG--T--G-A-G-T-A-AT-A-T-A-T-C-GG---A-A-C-GT-G--C-C-CAG--TA-G----T-G-G-G-G-G---AT-AA-C--TG------------------C-T-C-…
>ICSZ4EG01BH9FM
A-T-T--G-A-A-C-G-C--T-G-G-C--G-G--C-A-T-G---C---C-T--TA-C--AC-A-T-G-C--A-A-G--T-C--GA-A-CG-----------G-TAA--C-A--G-----------------------------------G-T-C--------------------TTC-G---------------------------G--A--T---------------------------G-C-T----G--AC--G-------AA-T-G-G-C-GA-A--C--G-GG--T--G-A-G-T-A-AT-A-C-A-T-C-GG---A-A-C-GT-G--C-C-CAG--AC-G----T-G-G-G-G-G---AT-AA-C--GA------------------G-G-C-…
>ICSZ4EG01BF03F
A-A-C--G-A-A-C-G-C--T-G-G-C--G-G--C-A-T-G---C---C-T--AA-C--AC-A-T-G-C--A-A-G--T-C--GA-A-CG-A---------G-A-----------------------------------------------C-C--------------------TTC-G---------------------------G--G------------------------------------------TC--T-------AG-TGG-G-C-GC-A--C--G-GG--T--G-C-G-T-A-AC-GCC-G-T-G-GG---A-A-T-CT-G--C-C-CTT--GG-G----T-T-C-G-G-A---ATAAA-C--TC------------------G-C-C-…
>ICSZ4EG01BBMQ9
G-A-C--G-A-A-C-G-C--T-G-G-C--G-G--C-G-T-G---C---T-T--AA-C--AC-A-T-G-C--A-A-G--T-C--GA-A-CG-----------G--A---A-G--G-----------------------------C-C-C-T-G-C--------------------TTT-T---------------------------G--T----G-G-G-----------------------T-G----C--TC--G-------AG-T-G-G-C-GA-A--C--G-GG--T--G-A-G-T-A-AC-A-C-G-T-G-AG---TAA-C-CT-G--C-C-CTT--GA-C----T-T-TGG-G-G---AT-AA-C--TT------------------C-A-G-…
>ICSZ4EG01BB2BM
A-C-T--G-A-A-C-G-C--T-G-G-C--G-G--C-A-T-G---C---C-T--TA-C--AC-A-T-G-C--A-A-G--T-C--GA-A-CG-----------G-TAA--C-A--G-----------------------------------G-T-C--------------------TTC-G---------------------------G--A--T---------------------------G-C-T----G--AC--G-------AG-T-G-G-C-GA-A--C--G-GG--T--G-A-G-T-A-AT-A-C-A-T-C-GG---A-A-C-GT-G--C-C-C-G-ATC-G----T-G-G-G-G-G---AT-AA-C--GA------------------G-G-C-…
>ICSZ4EG01B4RS3
A-T-T--G-A-A-C-G-C--T-G-G-C--G-G--C-A-G-G---C---C-T--AA-C--AC-A-T-G-C--A-A-G--T-C--GA-A-TG-----------G-TAA--C-A--G----------------------------GA-A-A-C-A-G--------------------CTT-G---------------------------C--T--G-T-T-T--C------------------G-C-T----G--AC--G-------AG-T-G-G-C-GG-A--C--G-GG--T--G-A-G-T-A-AT-G-T-C-T-G-GG---A-A-A-CT-G--C-C-TGA--TG-G----A-G-G-G-G-G---AT-AA-C--TA------------------C-T-G-…
>ICSZ4EG01B3FF7
A-T-T--G-A-A-C-G-C--T-G-G-C--G-G--C-A-T-G---C---C-T--TA-C--AC-A-T-G-C--A-A-G--T-C--GA-A-CG-----------G-TAA--C-A--G-----------------------------------G-T-C--------------------TTC-G---------------------------G--A--T---------------------------G-C-T----G--AC--G-------AA-T-G-G-C-GA-A--C--G-GG--T--G-A-G-T-A-AT-A-C-A-T-C-GG---A-A-C-GT-G--C-C-C----AC-G----T-G-G-G-G-G---AT-AA-C--GA--------------------G-C-…
>ICSZ4EG01AZ744
G-ATT--G-A-A-C-G-C--T-G-G-C--G-G--C-A-T-G---C---C-T--TA-C--AC-A-T-G-C--A-A-G--T-C--GA-A-CG-----------G-AA---A-G--G-----------------------------C-C-C-T-G-C--------------------TTT-T---------------------------G--T--G-G-G-G-----------------------T-G----C--TC--G-------AG-T-G-G-C-GA-A--C--G-GG--T--G-A-G-T-A-AC-A-C-G-T-G-AG---TAA-C-CT-G--C-C-CTT--GA-C----T-T-T-G-G-G---AT-AA-C--TT------------------C-A-G-…
>ICSZ4EG01AYRIH
T---T--G-A-A-C-G-C--T-G-G-C--G-G--C-A-T-G---C---C-T--TA-C--AC-A-T-G-C--A-A-G--T-C--AA-A-CG-----------G-TAA--C-A--G-----------------------------------G-T-C--------------------TTC-G---------------------------G--A--T---------------------------G-C-T----G--AC--G-------AG-T-G-G-C-GA-A--C--G-GG--T--G-A-G-T-A-AT-A-C-A-T-C-GG---A-A-C-GT-G--C-C-CGA--TC-G----T-G-G-G-G-G---AT-AA-C--GA------------------G-G-C-…
>ICSZ4EG01AYEBG
G-A-T--G-A-A-C-G-C--T-G-G-C--G-G--C-G-T-G---C---T-T--AA-C--AC-A-T-G-C--A-A-G--T-C--GA-A-CG-G---------A-G----T-T--A---------ATTTGA-G-----------GA-A-GCAAG-C------------------TTGCT-T---------------------------G--A----A-G-A--A-T--TGAAT-----------T-A----A--CT--T-------AG-T-G-G-C-GG-A--C--G-GG--C--G-A-G-T-A-AC-A-C-G-T-G-AG---CAA-C-CT-G--C-CTCT---TA-C----A-G-G-G-G-A---AT-AA-C--AA------------------C-G-G-…
>ICSZ4EG01AVVFE
A---T--G-A-A-C-G-C--T-G-G-C--G-G--C-A-T-G---C---T-T--AA-C--AC-A-T-G-C--A-A-G--T-C--GA-A-CG-----------G-TAA--C-G--G-----------------------------------G-T-C--------------------TTC-G---------------------------G--A--T---------------------------G-C-T----G--AC--G-------AG-T-G-G-C-GA-A--C--G-GG--T--G-A-G-T-A-AT-A-C-A-T-C-GG---A-A-C-GT-G--C-C-CAG--AC-G----T-G-G-G-G-G---AT-AA-C--GA------------------G-G-C-…
>ICSZ4EG01AULXN
A-T-T--G-A-A-C-G-C--T-G-G-C--G-G--C-A-T-G---C---C-T--TA-C--AC-A-T-G-C--A-A-G--T-C--GA-A-CG-----------G-TA-----A--C---------------------------------G-G-G----------------------TCC-T---------------------------T--CGGGAT-------------------------G-C-T----G--AC--G-------AG-T-G-G-C-GA-A--C--G-GG--T--G-A-G-T-A-AT-A-T-A-T-C-GG---A-A-C-GT-G--C-C-CAG--TA-G----T-G-G-G-G-G---AT-AA-C--TG------------------C-T-C-…
>ICSZ4EG01ATVOT
A-T-T--G-A-A-C-G-C--T-G-G-C--G-G--C-A-T-G---C---C-T--TA-C--AC-A-T-G-C--A-A-G--T-C--GA-A-CG-----------G-TAA--C-A--G-----------------------------------G-T-C--------------------TTC-G---------------------------G--A--T---------------------------G-C-T----G--AC--G-------AG-T-G-G-C-GA-A--C--G-GG--T--G-A-G-T-A-AT-A-C-A-T-C-GG---A-A-C-GT-G--C-CCAGA--CG-G----C-G-G-G-G-G---AT-AA-C--GA------------------G-G-C-…
>ICSZ4EG01APPFB
A-T-T--G-A-A-C-G-C--T-G-G-C--G-G--C-A-T-G---C---C-T--TA-C--AC-A-T-G-C--A-A-G--T-C--GA-A-CG-----------G-TAA--C-AG-G-----------------------------------G-T-C--------------------TTCGG---------------------------G--A--T---------------------------G-C-T----G--AC--G-------AG-T-G-G-C-GA-A--C--G-GG--T--G-A-G-T-A-AT-A-C-A-T-C-GG---A-A-C-GT-G--C-C-CAG--ACGG----T-G-G-G-G-G---AT-AA-C--GA------------------G-G-C-…
>ICSZ4EG01AO75L
A---T--G-A-A-C-G-C--T-G-G-C--G-G--C-A-T-G---C---C-T--TA-C--AC-A-T-G-C--A-A-G--T-C--GA-A-CG-----------G-TAG-------C---------------------------------G-G-G----------------------TCC-T---------------------------T--C--G-G-------------------------G-A-T----GCCGAC-G-------AG-T-G-G-C-GA-A--C--G-GG--T--G-A-G-T-A-AT-A-T-A-T-C-GG---A-A-C-GT-G--C-C-CAG--TA-G----T-G-G-G-G-G---AT-AA-C--TG------------------C-T-C-…
>ICSZ4EG01AFVW1
G-ATT--G-A-A-C-G-C--T-G-G-C--G-G--C-A-G-G---C---T-T--AA-T--AC-A-T-G-C--A-A-G--T-C--GT-G-GG-----------G-CAG--C-A--T----------------------------G--A---G-T-A--------------------GCA-A---------------------------T--A------C-T--T------------------G-A-T----G--GC--G-------AC-C-G-G-C-AA-A--C--G-GA--T--G-C-G-G-A-AC-A-C-G-T-A-CA---CAA-C-CT-T--C-C-TAC--AA-G----T-G-G-G-G-A---AT-AG-C--CC------------------A-G-A-…
>ICSZ4EG01AFFAD
A-T-T--G-A-A-C-G-C--T-G-G-C--G-G--C-A-G-G---C---C-T--AA-C--AC-A-T-G-C--A-A-G--T-C--GA-G-CG-----------G-TAA--C-A--G-----------------------------G-G-G-A-A-G--------------------CTT-G---------------------------C--T--T-C-T-C---------------------G-C-T----G--AC--G-------AG-C-G-G-C-GG-A--C--G-GG--T--G-A-G-T-A-AT-G-T-A-T-G-GG---G-A-T-CT-G--C-C-CGA--TA-G----A-G-G-G-G-G---AT-AA-C--TA------------------C-T-G-…
>ICSZ4EG01ACXOU
G-ATT--G-A-A-C-G-C--T-G-G-C--G-G--C-A-T-G---C---C-T--TA-C--AC-A-T-G-C--A-A-G--T-C--GA-A-CG-G---------A-G----T-T--A---------ATTTGA-G-----------GA-A-GCAAG-C------------------TTGCT-T---------------------------G--A----A-G-A--A-T--TGAAT-----------T-A----A--CT--T-------AG-T-G-G-C-GG-A--C--G-GG--C--G-A-G-T-A-AC-A-C-G-T-G-AG---CAA-C-CT-G--C-CTCT---TA-C----A-G-G-G-G-A---AT-AA-C--AA------------------C-G-G-…
>ICSZ4EG01BN91K
A-T-T--G-A-A-C-G-C--T-G-G-C--G-G--C-A-T-G---C---C-T--TA-C--AC-A-T-G-C--A-A-G--T-C--GA-A-CG-----------G-TAA--C-G--G-----------------------------------G-TCC--------------------TTCGG---------------------------G--A--T---------------------------G-C-C----G--AC--G-------AG-T-G-G-C-GA-A--C--G-GG--T--G-A-G-T-A-AT-A-T-A-T-C-GG---A-A-C-GT-G--C-C-CAG--TA-G----T-G-G-G-G-G---AT-AA-C--TG------------------C-T-C-…
>ICSZ4EG01A1GXW
A-T-T--G-A-A-C-G-C--T-G-G-C--G-G--C-A-T-G---C---C-T--TA-C--AC-A-T-G-C--A-A-G--T-C--GA-A-C------------G--AT--A-A--C---------------------------------G-G-G----------------------TCC-T---------------------------T--C--G-G-------------------------G-A-T----GCCGAC-G-------AG-T-G-G-C-GA-A--C--G-GG--T--G-A-G-T-A-AT-A-T-A-T-C-GG---A-A-C-GT-G--C-C-CAG--TA-G----T-G-G-G-G-G---AT-AA-C--TG------------------C-T-C-…
>ICSZ4EG01A0U89
A---T--G-A-A-C-G-C--T-A-G-C--G-G--G-A-G-G---C---C-T--AA-C--AC-A-T-G-C--A-A-G--T-C--GA-A-CG-----------G-TAA--C-A--G-----------------------------------G-T-C--------------------TTC-G---------------------------G--A--T---------------------------G-C-T----G--AC--G-------AG-T-G-G-C-GA-A--C--G-GG--T--G-A-G-T-A-AT-A-C-A-T-C-GG---A-A-C-GT-G--C-C-CGA--TC-G----T-G-G-G-G-G---AT-AA-C--GA------------------G-G-C-…
>ICSZ4EG01A0S6Z
A-T-T--G-A-A-C-G-C--T-G-G-C--G-G--C-A-T-G---C---C-T--TA-C--AC-A-T-G-C--A-A-G--T-C--GA-A-CG-----------G-TAA--C-A--G-----------------------------------G-T-C--------------------TTC-G---------------------------G--A--T---------------------------G-C-T----G--AC--G-------AG-T-G-G-C-GA-A--C--G-GG--T--G-A-G-T-A-AT-A-C-A-T-C-GG---A-A-C-GT-G--C-C-CAG--AC-G----T-G-G-G-G-G---AT-AA-C--GA------------------G-G-C-…
>ICSZ4EG01B45HT
A-T-T--G-A-A-C-G-C--T-G-G-C--G-G--C-A-T-G---C---C-T--TA-C--AC-A-T-G-C--A-A-G--T-C--GA-A-CG-----------G-CAG--C-A--T----------------------------GA-T-C-T-A-G--------------------CTT-G---------------------------C--T--A-G-A-T--T------------------G-A-T----G--GC--G-------AG-T-G-G-C-GA-A--C--G-GG--T--G-A-G-T-A-AT-A-C-A-T-C-GG---A-A-C-GT-G--C-C-CTG--TA-G----T-G-G-G-G-G---AT-AA-C--TA------------------G-T-C-…
>ICSZ4EG01A658Z
A-A-C--G-A-A-C-G-C--T-G-G-C--G-G--C-A-T-G---C---C-T--AA-C--AC-A-T-G-C--A-A-G--T-C--GA-A-CG-----------G-CAG--C-A--T----------------------------GA-T-C-T-A-G--------------------CTT-G---------------------------C--T--A-G-A-T--T------------------G-A-T----G--GC--G-------AG-T-G-G-C-GA-A--C--G-GG--T--G-A-G-T-A-AT-A-C-A-T-C-GG---A-A-C-GT-G--C-C-CTG--TA-G----T-G-G-G-G-G---AT-AA-C--TA------------------G-T-C-…
>ICSZ4EG01A4GDC
A-G-C--G-A-A-C-G-C--T-G-G-C--G-G--C-A-G-G---C---T-T--AA-C--AC-A-T-G-C--A-A-G--T-C--GA-G-CG-G---------G-C---------------------------------------------G-T-A--------------------GCA-A---------------------------T--A--C---------------------------------------GT--C-------AG-C-G-G-C-AG-A--C--G-GG--T--G-A-G-T-A-AC-G-C-G-T-G-GG---A-A-C-GT-A--C-C-TTT--TG-G----T-T-C-G-G-A---AC-AA-C--AC------------------A-G-G-…
>ICSZ4EG01CHVS7
A-T-T--G-A-A-C-G-C--T-G-G-C--G-G--C-A-T-G---C---C-T--TA-C--AC-A-T-G-C--A-A-G--T-C--GA-A-CG-----------G-TAA--C-A--G-----------------------------------G-T-C--------------------TTC-G---------------------------G--A--T---------------------------G-C-T----G--AC--G-------AG-T-G-G-C-GA-A--C--G-GG--T--G-A-G-T-A-AT-A-C-A-T-C-GG---A-A-C-GT-G--C-C-CGA--TC-G----T-G-G-G-G-G---AT-AA-C--GA------------------A-G-C-…
>ICSZ4EG01BTJP9
A-A-C--G-A-A-C-G-C--T-G-G-C--G-G--C-A-T-G---C---C-T--AA-C--AC-A-T-G-C--A-A-G--T-C--GA-G-CG-G---------G-C---------------------------------------------G-T-A--------------------GCA-A---------------------------T--A--C---------------------------------------GT--C-------AG-C-G-G-C-AG-A--C--G-GG--T--G-A-G-T-A-AC-G-C-G-T-G-GG---A-A-C-GT-A--C-C-TTT--TG-G----T-T-C-G-G-A---AC-AA-C--AC------------------A-G-G-…
>ICSZ4EG01CG8US
A-A-C--G-A-A-C-G-C--T-G-G-C--G-G--C-A-T-G---C---C-T--AA-C--AC-A-T-G-C--A-A-G--T-C--GA-A-CG-A---------G-A-----------------------------------------------C-C--------------------TTC-G---------------------------G--G------------------------------------------TC--T-------AG-T-G-G-C-GC-A--C--G-GG--T--G-C-G-T-A-AC-G-C-G-T-G-GG---A-A-T-CT-G--C-C-CTT--GG-G----T-T-C-G-G-A---AT-AA-C--TC------------------G-C-C-…
>ICSZ4EG01C07F4
A-A-C--G-A-A-C-G-C--T-G-G-C--G-G--C-A-T-G---C---C-T--TA-C--AC-A-T-G-C--A-A-G--T-C--GA-A-CG-----------G-TAA--C----G----------------------------GG-T-C--------------------------CTT-----------------------------C--G--G-G-A----T------------------G-C-C----G--AC--G-------AG-T-G-G-C-GA-A--C--G-GG--T--G-A-G-T-A-AT-A-T-A-T-C-GG---A-A-C-GT-G--C-C-CAG--TA-G----T-G-G-G-G-G---AT-AA-C--TA------------------G-T-C-…
>ICSZ4EG01CW0LB
A-A-C--G-A-A-C-G-C--T-G-G-C--G-G--C-A-T-G---C---C-T--TA-C--AC-A-T-G-C--A-A-G--T-C--GA-A-CG-----------G-CAG--C-A--T---------------------------------GATCT-A--------------------GC--T---------------------------T--G--C-TA----------------------GATTGAT----G--GC--G-------AG-T-G-G-C-GA-A--C--G-GG--T--G-A-G-T-A-AT-A-T-A-T-C-GG---A-A-C-GT-G--C-C-CAG--TA-G----T-G-G-G-G-G---AT-AA-C--TG------------------C-T-C-…
>ICSZ4EG01A45EE
A-T-T--G-A-A-C-G-C--T-G-G-C--G-G--C-A-T-G---C---C-T--TA-C--AC-A-T-G-C--A-A-G--T-C--GA-A-CG-----------G-TAA--C----G----------------------------GG-T-C--------------------------CTT-----------------------------C--G--G-G-A----T------------------G-C-C----G--AC--G-------AG-T-G-G-C-GA-A--C--G-GG--T--G-A-G-T-A-AT-A-C-A-T-C-GG---A-A-C-GT-G--C-C-CTG--TA-G----T-G-G-G-G-G---AT-AA-C--TA------------------G-T-C-…
>ICSZ4EG01APSO6
G-A-T--G-A-A-C-G-C--T-A-G-C--G-G--C-A-G-G---C---C-T--AA-T--AC-A-T-G-C--A-A-G--T-C--GA-A-CG-A---------T-A----C-T--T-------------------------------T-C-C-A-G--------------------CTT-G---------------------------C--T--G-G-A-------------------------A-A----G--GA--A-------AG-T-G-G-C-GC-A--C--G-GG--T--G-C-G-T-A-AC-G-C-G-T-A-TG---CAA-C-CT-A--C-C-TTA--AT-C----A-G-G-G-G-G---AT-AG-C--CC------------------G-A-A-…
>ICSZ4EG01CV2IZ
A-T-T--G-A-A-C-G-C--T-G-G-C--G-G--C-A-T-G---C---C-T--TA-C--AC-A-T-G-C--A-A-G--T-C--GA-A-CG-----------G-TAA--C-A-------------------------------G----G-T------------------------CTT-----------------------------C-----G-G-A----T------------------G-C-T----G--AC--G-------AG-T-G-G-C-GA-A--C--G-GG--T--G-A-G-T-A-AT-A-C-A-T-C-GG---A-A-C-GT-G--C-C-CTG--TA-G----T-G-G-G-G-G---AT-AA-C--TA------------------G-T-C-…
>ICSZ4EG01EZTNG
A-A-C--G-A-A-C-G-C--T-G-G-C--G-G--C-A-T-G---C---C-T--AA-C--AC-A-T-G-C--A-A-G--C-C--GA-G-CG-G---------T-A----T-T--G---------------------------------T-T-T-C--------------------TTC-G---------------------------G--A--A-A---------------------------T-G----A--GA--G-------AG-C-G-G-C-GT-A--C--G-GG--T--G-C-G-G-A-AC-A-C-G-T-G-TG---CAA-C-CT-G--C-C-TTT--AT-C----T-G-G-G-G-G---AT-AG-C--CT------------------T-T-C-…
>ICSZ4EG01ER7ZX
A-A-C--G-A-A-C-G-C--T-G-G-C--G-G--C-A-T-G---C---C-T--TA-C--AC-A-T-G-C--A-A-G--T-C--GA-A-CG-----------G-CAG--C-A--T----------------------------GA-T-C-T-A-G--------------------CTT-G---------------------------C--T--A-G-A-T--T------------------G-A-T----G--GC--G-------AG-T-G-G-C-GA-A--C--G-GG--T--G-A-G-T-A-AT-A-C-G-T-C-GG---A-A-C-GT-G--C-C-CTG--TA-G----T-G-G-G-G-G---AT-AA-C--TA------------------G-T-C-…
>ICSZ4EG01EOBHC
G-A-T--G-A-A-C-G-C--T-G-G-C--G-G--C-G-T-G---C---C-T--AA-T--AC-A-T-G-C--A-A-G--T-C--GA-G-CG-A---------A-C----A-G--A----------------------------CG-A-G-G-A-G--------------------CTT-G---------------------------C--T--C-C-T-T--T--------------------G-A----C--GT--T-------AG-C-G-G-C-GG-A--C--G-GG--T--G-A-G-T-A-AC-A-C-G-T-A-GG---TAA-C-CT-A--C-C-TAT--AA-G----A-C-T-G-G-G---AT-AA-C--TC------------------C-G-G-…
>ICSZ4EG01EJI0Y
A-T-T--G-A-A-C-G-C--T-G-G-C--G-G--C-A-T-G---C---C-T--TA-C--AC-A-T-G-C--A-A-G--T-C--GA-A-CG-----------G-TAA--C-A--G-----------------------------------G-T-C--------------------TTC-G---------------------------G--A--T---------------------------G-C-T----G--AC--G-------AG-T-G-G-C-GA-A--C--G-GG--T--G-A-G-T-A-AT-A-C-A-T-C-GG---A-A-C-GT-G--C-C-CGA--TC-G----T-G-G-G-G-G---AT-AA-C--GA------------------A-G-C-…
>ICSZ4EG01EFXEQ
A-A-C--G-A-A-C-G-C--T-G-G-C--G-G--C-A-T-G---C---C-T--AG-C--AC-A-T-G-C--A-A-G--T-C--GA-A-CG-A---------G-A-----------------------------------------------C-C--------------------TTC-G---------------------------G--G------------------------------------------TC--T-------AG-T-G-G-T-GC-A--C--G-GG--C--G-C-G-T-A-AC-G-C-G-T-G-GG---A-A-T-CT-G--C-C-CTT--GG-G----T-T-C-G-G-A---AT-AA-C--TC------------------G-C-C-…
>ICSZ4EG01ECBH1
G-A-C--G-A-A-C-G-C--T-G-G-C--G-G--C-G-T-G---C---T-T--AA-C--AC-A-T-G-C--A-A-G--T-C--GA-A-CG-----------G-AA---A-G--G-----------------------------C-C-C---T-G--------------------CTT-G---------------------------C--A----G-G-G-----------------------T-A----C--TC--G-------AG-T-G-G-C-GA-A--C--G-GG--T--G-A-G-T-A-AC-A-C-G-T-G-GG---TGA-T-CT-G--C-C-CTG--CA-C----T-T-C-G-G-G---AT-AA-G--CC------------------T-G-G-…
>ICSZ4EG01EAA0M
A-A-C--G-A-A-C-G-C--T-G-G-C--G-G--C-A-T-G---C---C-T--AA-C--AC-A-T-G-C--A-A-G--T-C--GA-A-CG-A---------G-A-----------------------------------------------C-C---------------------TC-G---------------------------G--G------------------------------------------TC--T-------AG-T-G-G-C-GC-G--C--G-GG--T--G-C-G-T-A-AC-G-C-G-T-G-GG---A-A-T-CT-G--C-C-CTT--GG-G----T-T-C-G-G-A---AT-AA-C--TC------------------G-C-C-…
>ICSZ4EG01DZW4M
A-T-T--G-A-A-C-G-C--T-G-G-C--G-G--C-A-T-G---C---C-T--TA-C--AC-A-T-G-C--A-A-G--T-C--GA-A-CG-----------G-TAA--C----------------------------------G-G-G---T-C--------------------CTT-----------------------------C------GG-G-A--T------------------G-C-C----G--AC--G-------AG-T-G-G-C-GA-A--C--G-GG--T--G-A-G-T-A-AT-A-T-A-T-C-GG---A-A-C-GT-G--C-C-CAG--TA-G----T-G-G-G-G-G---AT-AA-C--TG------------------C-T-C-…
>ICSZ4EG01CU5JI
A-T-T--G-A-A-C-G-C--T-G-G-C--G-G--C-A-T-G---C---C-T--TA-C--AC-A-T-G-C--A-A-G--T-C--GA-A-CG-----------G-CAG--C-A--T---------------------------------GATCT-A--------------------GC--T---------------------------T--G--C-TA----------------------GATTGAT----G--GC--G-------AG-T-G-G-C-GA-A--T--G-GG--T--G-A-G-T-A-AT-A-C-A-T-C-GG---A-A-C-GT-G--C-C-CTG--TA-G----T-G-G-G-G-G---AT-AA-C--TG------------------C-T-C-…
>ICSZ4EG01DX3IA
A-T-T--G-A-A-C-G-C--C-G-G-C--G-G--C-A-T-G---C---C-T--AA-C--AC-A-T-G-C--A-A-G--T-C--GA-A-CG-A---------G-A-----------------------------------------------C-C--------------------TTC-G---------------------------G--G------------------------------------------TC--T-------AG-T-G-G-C-GC-A--C--G-GG--T--G-C-G-T-A-AC-G-C-G-T-G-GG---A-A-T-CT-G--C-C-CTT--GG-G----T-T-C-G-G-A---AT-AA-C--TC------------------G-C-C-…
>ICSZ4EG01BP5DH
A-T-T--G-A-A-C-G-C--T-G-G-C--G-G--C-A-T-G---C---C-T--TA-C--AC-A-T-G-C--A-A-G--T-C--GA-ACGGTAACGG-----G-T-----------------------------------------------C-C--------------------TTC-G---------------------------G--GA------------------------------------TGCCGAC--G-------AG-T-G-G-C-GA-A--C--G-GG--T--G-C-G-T-A-AC-G-C-G-T-G-GG---A-A-T-CT-G--C-C-CTT--GG-G----T-T-C-G-G-A---AT-AA-C--TC------------------G-C-C-…
>ICSZ4EG01DR9IH
A-G-C--G-A-A-C-G-C--T-G-G-C--G-G--C-A-G-G---C---T-T--AA-C--AC-A-T-G-C--A-A-G--T-C--GA-A-CG-A---------G-A-----------------------------------------------C-C--------------------TTC-G---------------------------G--G------------------------------------------TC--T-------AG-T-G-G-C-GC-A--C--G-GG--T--G-C-G-T-A-AC-G-C-G-T-G-GG---A-A-T-CT-G--C-C-CCT--GG-G----T-T-C-G-G-A---AT-AA-C--TC------------------G-C-C-…
>ICSZ4EG01DPQIF
A-A-C--G-A-A-C-G-C--T-G-G-T--G-G--C-A-T-G---C---C-T--AA-C--AC-G-T-G-C--A-A-G--T-C--GA-A-CG-A---------G-A-----------------------------------------------C-C--------------------TTC-G---------------------------G--G------------------------------------------TC--T-------AG-T-G-G-C-GC-A--C--G-GG--C--G-C-G-T-A-AC-G-C-G-T-G-GG---A-A-T-CT-G--C-C-CTT--GG-G----T-T-C-G-G-A---AT-AA-C--TC------------------G-C-C-…
>ICSZ4EG01DP7YA
A-A-C--G-A-A-C-G-C--T-A-G-C--G-G--C-A-T-G---C---C-T--AA-C--AC-A-T-G-C--A-A-G--T-C--GA-A-CG-A---------G-A-----------------------------------------------C-C--------------------TTC-G---------------------------G--G------------------------------------------TC--T-------AG-T-G-G-C-GC-A--C--G-GG--T--G-C-G-T-A-AC-G-C-G-T-G-GG---A-A-T-CT-G--C-C-CTT--GG-G----T-C-C-G-G-A---AT-AA-C--TC------------------G-C-C-…
>ICSZ4EG02I8LYQ
A-A-C--G-A-A-C-G-C--T-G-G-C--G-G--C-A-T-G---C---C-T--AA-C--AC-A-T-G-C--A-A-G--T-C--GA-A-CG-----------G-TAA--C-A-------------------------------G----G-T------------------------CTT-----------------------------C-----G-G-A----T------------------G-C-T----G--AC--G-------AG-T-G-G-C-GA-A--C--G-GG--T--G-A-G-T-A-AT-A-C-A-T-C-GG---A-A-C-GT-G--C-C-CTG--TA-G----T-G-G-G-G-G---AT-AA-C--TA------------------G-T-C-…
>ICSZ4EG01DI9FV
A-A-C--G-A-A-C-G-C--T-G-G-C--G-G--C-A-T-G---C---C-T--AA-C--AC-A-T-G-C--A-A-G--T-C--GA-A-CG-A---------G-A-----------------------------------------------C-C--------------------TTC-G---------------------------G--G------------------------------------------TC--T-------AG-T-G-G-C-GC-A--C--G-GG--T--G-C-G-T-A-AC-G-C-G-T-G-GG---A-A-C-CT-G--C-C-CTT--AG-G----T-T-C-G-G-A---AT-AA-C--TC------------------C-T-C-…
>ICSZ4EG01DADMN
A-A-C--G-A-A-C-G-C--T-G-G-C--G-G--C-A-T-G---C---C-T--TA-C--AC-A-T-G-C--A-A-G--T-C--GA-A-CG-----------G-TAA--C-A--G-----------------------------------G-T-C--------------------TTC-G---------------------------G--A--T---------------------------G-C-T----G--AC--G-------AG-T-G-G-C-GA-A--C--G-GG--T--G-A-G-T-A-AT-A-C-A-T-C-GG---A-A-T-GT-G--C-C-CGA--TC-G----T-G-G-G-G-G---AT-AA-C--GA------------------A-G-C-…
>ICSZ4EG01D6Z0H
A-A-C--G-A-A-C-G-C--T-G-G-C--G-G--C-A-T-G---C---C-T--AA-C--AC-A-T-G-C--A-A-G--T-C--GA-A-CG-A---------G-A-----------------------------------------------C-C--------------------TTC-G---------------------------G--G------------------------------------------TC--T-------AG-T-G-G-C-GC-A--C--G-GG--T--G-C-G-T-A-AC-G-C-G-T-G-GG---A-A-T-CT-G--C-C-CTT--GG-G----T-T-C-G-G-A---AT-AA-T--TC------------------G-T-C-…
>ICSZ4EG01D5FZS
A-T-T--G-A-A-C-G-C--T-G-G-C--G-G--C-A-T-G---C---C-T--AA-C--AC-A-T-G-C--A-A-G--T-C--GA-A-CG-A---------G-A-----------------------------------------------C-C--------------------TTC-A---------------------------G--G------------------------------------------TC--T-------AG-T-G-G-C-GC-A--C--G-GG--T--G-C-G-T-A-AC-G-C-G-T-G-GG---A-A-C-CT-G--C-C-CTT--GG-G----T-T-C-G-G-A---AT-AA-C--TC------------------G-C-C-…
>ICSZ4EG01D52FX
A-A-C--G-A-A-C-G-C--C-G-G-C--G-G--C-A-T-G---C---C-T--AA-C--AC-A-T-G-C--A-A-G--T-C--GA-A-CG-A---------G-A-----------------------------------------------C-C--------------------TTC-G---------------------------G--G------------------------------------------TC--T-------AG-T-G-G-C-GC-A--C--G-GG--T--G-C-G-T-A-AC-G-C-G-T-G-GG---A-A-T-CT-G--C-C-CTT--GG-G----T-T-CGG-G-A---AT-AA-C--TC------------------G-C-C-…
>ICSZ4EG01D4VF5
A-A-C--G-A-A-C-G-C--T-G-G-C--G-G--C-A-T-G---C---C-T--TA-C--AC-A-T-G-C--A-A-G--T-C--GA-A-CG-----------G-CAG--C-A--T----------------------------GG-T-C-T-A-G--------------------CTT-G---------------------------C--T--A-G-A-T--T------------------G-A-T----G--GC--G-------AG-T-G-G-C-GA-A--C--A-GG--T--G-A-G-T-A-AT-A-T-A-T-C-GG---A-A-C-GT-G--C-C-CAG--TA-G----T-G-G-G-G-G---AT-AA-C--TG------------------C-T-C-…
>ICSZ4EG01CYYHU
G-A-T--G-A-A-C-G-C--T-G-G-C--G-G--C-G-T-G---C---C-T--AA-C--AC-A-T-G-C--A-A-G--T-C--GA-A-CG-A---------G-A-----------------------------------------------C-C--------------------TTC-G---------------------------G--G------------------------------------------TC--T-------AG-T-G-G-C-GC-A--C--G-GG--T--G-C-G-T-A-AC-G-C-G-T-G-GG---A-A-T-CT-G--C-C-CTT--GG-G----T-T-C-G-G-A---AT-AA-C--TC------------------G-C-C-…
>ICSZ4EG01CXTN6
A-A-C--G-A-A-C-G-C--T-G-G-C--G-G--C-A-T-G---C---C-T--AA-C--AC-A-T-G-C--A-A-G--T-C--GA-A-CG-A---------G-A-----------------------------------------------C-C--------------------TTC-G---------------------------G--G------------------------------------------TC--T-------AG-T-G-G-C-GC-A--C--G-GG--T--G-C-G-T-A-AC-C-C-G-T-G-GG---A-A-T-CT-G--C-C-CTT--GG-G----C-T-C-G-G-A---AT-AA-C--TC------------------G-C-C-…
>ICSZ4EG01CSBMF
A-A-C--G-A-A-C-G-C--T-G-G-C--G-G--C-A-T-G---C---C-T--AA-C--AC-A-T-G-C--A-A-G--T-C--GA-A-CG-A---------G-A-----------------------------------------------C-C--------------------TCC-G---------------------------G--G------------------------------------------TC--T-------AG-T-G-G-C-GC-A--C--G-AG--T--G-C-G-T-A-AC-G-C-G-T-G-GG---A-A-T-CC-G--C-C-CTT--GG-G----T-T-C-G-G-A---AT-AA-C--TC------------------G-C-C-…
>ICSZ4EG01CRBPR
G-A-T--G-A-A-C-G-C--T-A-G-C--G-G--G-A-G-G---C---C-T--AA-C--AC-C-T-G-C--A-A-G--T-C--GA-A-CG-A---------G-A-----------------------------------------------C-C--------------------TTC-G---------------------------G--G------------------------------------------TC--T-------AG-T-G-G-C-GC-A--C--G-GG--T--G-C-G-T-A-AC-G-C-G-T-G-GG---A-A-T-CT-G--C-C-CTT--GG-G----T-T-C-G-G-A---AT-AA-C--TC------------------G-C-C-…
>ICSZ4EG01CQ4JV
A-A-C--G-A-A-C-G-C--T-G-A-C--G-G--C-A-T-G---C---C-T--AA-C--AC-A-T-G-C--A-A-G--T-C--GA-A-CG-A---------G-A-----------------------------------------------C-C--------------------TTC-G---------------------------G--G------------------------------------------TC--T-------AG-T-G-G-C-GC-A--C--G-GG--T--G-C-G-T-A-AC-G-C-G-T-G-GG---A-A-T-CT-G--C-C-CTT--GG-G----T-T-C-G-G-A---AT-AA-C--TC------------------G-C-T-…
>ICSZ4EG01CP7GP
A-A-C--G-A-A-C-G-C--T-G-G-C--G-G--C-A-T-G---C---C-T--TA-C--AC-A-T-G-C--A-A-G--T-C--GA-A-CG-----------G-CAG--C-A--T----------------------------GA-T-C-T-A-G--------------------CTT-G---------------------------C--T--A-G-A-T--T------------------G-A-T----G--GC--G-------AG-T-G-G-C-GA-A--C--G-GG--T--G-A-G-T-A-AT-A-C-A-T-C-GG---A-A-C-GT-G--C-C-CTG--TAGG----T-G-G-G-G-G---AT-AA-C--TA------------------G-T-C-…
>ICSZ4EG01COMRD
A-A-C--G-A-A-C-G-C--T-G-G-C--G-G--C-A-T-G---C---C-T--TA-C--AC-A-T-G-C--A-A-G--T-C--GA-A-CG-----------G-CAG--C-A--T----------------------------AA-T-C-T-A-G--------------------CTT-G---------------------------C--T--A-G-A-T--T------------------G-A-T----G--GC--G-------AG-T-G-G-C-GA-A--C--G-GG--T--G-A-G-T-A-AT-A-C-A-T-C-GG---A-A-C-GT-G--C-C-CTG--TA-G----T-G-G-G-G-G---AT-AA-C--TA------------------G-T-C-…
>ICSZ4EG01CAJ06
A-A-C--G-A-A-C-G-C--T-G-G-C--G-G--C-A-T-G---C---C-T--AA-C--AC-A-T-G-C--A-A-G--T-C--GA-A-CG-A---------G-A-----------------------------------------------C-C--------------------TTC-G---------------------------G--G------------------------------------------TC--T-------AG-T-G-G-C-GC-A--C--G-GG--T--G-C-G-T-A-AC-G-C-G-T-G-GG---A-A-T-CT-G--C-C-TTT--GG-G----T-T-C-G-G-A---AT-AA-C--TC------------------G-C-C-…
>ICSZ4EG01C884U
A-A-C--G-A-A-C-G-C--T-G-G-C--G-G--C-A-T-G---C---C-T--AA-C--AC-A-T-G-C--A-A-G--T-C--GA-A-CG-A---------A-A-----------------------------------------------C-C--------------------TTC-G---------------------------G--G------------------------------------------TC--T-------AG-T-G-G-C-GC-A--C--G-GG--T--G-C-G-T-A-AC-G-C-G-T-G-GG---A-A-T-CC-G--C-C-CTT--GG-G----T-T-C-G-G-A---AT-AA-C--TC------------------G-C-C-…
>ICSZ4EG01C6TQF
A-A-C--G-A-A-C-G-C--T-G-G-C--G-G--C-A-T-G---C---C-T--AA-C--AC-A-T-G-C--A-A-G--T-C--GA-A-CG-A---------G-A-----------------------------------------------C-C--------------------TTC-G---------------------------G--G------------------------------------------TC--T-------AG-T-G-G-C-GC-A--C--G-GG--T--G-C-G-T-G-AC-G-C-G-T-G-GG---A-A-T-CT-G--C-C-CTT--GG-G----C-T-C-G-G-A---AT-AA-C--TC------------------G-C-C-…
>ICSZ4EG01C2J7X
A-A-C--G-A-A-C-G-C--T-G-G-C--G-G--C-A-T-G---C---C-T--AA-C--AC-A-T-G-C--A-A-G--T-C--GA-A-CG-A---------G-A-----------------------------------------------C-C--------------------TTC-G---------------------------G--G------------------------------------------TC--T-------AG-T-G-G-C-GC-A--C--G-GG--T--G-C-G-T-A-AC-G-C-G-T-G-GG---A-A-T-CT-G--C-C-CTT--GG-G----T-T-C-A-G-A---AT-AA-C--TC------------------G-C-C-…
>ICSZ4EG01BZ6OD
A-T-T--G-A-A-C-G-C--T-G-G-C--G-G--C-A-T-G---C---C-T--TA-C--AC-A-T-G-C--A-A-G--T-C--GA-A-CG-----------G-TA-----A--C---------------------------------G-G-G----------------------TCC-T---------------------------T--C--G-G-------------------------G-A-T----GCCGAC-G-------AG-T-G-G-C-GA-A--T--G-GG--T--G-A-G-T-A-AT-A-T-A-T-C-GG---A-A-C-GT-G--C-C-CAG--TA-G----T-G-G-G-G-G---AT-AA-C--TG------------------C-T-C-…
>ICSZ4EG01BOQ5H
G-A-C--G-A-A-C-G-C--T-G-G-C--G-G--C-G-T-G---C---T-T--AA-C--AC-A-T-G-C--A-A-G--T-C--GA-A-CG-A---------G-A-----------------------------------------------C-C--------------------TCC-G---------------------------G--G------------------------------------------TC--T-------AG-T-G-G-C-GC-A--C--G-GG--T--G-C-G-T-A-AC-A-C-G-T-G-GG---A-A-T-CT-G--C-C-CTT--GG-G----T-T-C-G-G-A---AT-AA-C--TC------------------G-C-C-…
>ICSZ4EG01BO6RB
A-A-C--G-A-A-C-G-C--T-G-G-C--G-G--C-A-T-G---C---C-T--AA-C--AC-A-T-G-C--A-A-G--T-C--GA-A-CG-A---------G-A-----------------------------------------------C-C--------------------TTC-G---------------------------G--G------------------------------------------TC--T-------AG-T-G-G-C-GC-A--C--G-GG--T--G-C-G-T-A-AC-G-C-G-T-G-GG---A-A-C-CT-G--C-C-CTG--TG-G----T-A-C-G-G-A---AT-AA-C-TCC------------------G-G-G-…
>ICSZ4EG01BM84L
A-A-C--G-A-A-C-G-C--T-G-G-C--G-G--C-A-T-G---T---C-T--AA-C--AC-A-T-G-C--A-A-G--T-C--GA-A-CG-A---------G-A-----------------------------------------------C-C--------------------TTC-G---------------------------G--G------------------------------------------TC--T-------AG-T-G-G-C-GC-A--T--G-GG--T--G-C-G-T-A-AC-G-C-G-T-G-GG---A-A-T-CT-G--C-C-CTT--GG-G----T-T-C-G-G-A---AT-AA-C--TC------------------G-C-C-…
>ICSZ4EG02GQJ4P
A-T-T--G-A-A-C-G-C--T-G-G-C--G-G--C-A-T-G---C---C-T--TA-C--AC-A-T-G-C--A-A-G--T-C--GA-A-CG-----------G-CAG--C-AT-GAT---------------------------------C-TAGC------------------TTGCTA---------------------------G--AT-T---------------------------G-A-T----G--GC--G-------AG-T-G-G-C-GA-A--C--G-GG--T--G-A-G-T-A-AT-A-C-A-T-C-GG---A-A-C-GT-G--C-C-CTG--TA-G----T-G-G-G-G-G---AT-AA-C--TA------------------G-T-C-…
>ICSZ4EG01BLQEL
A-A-C--G-A-A-C-G-C--T-G-G-C--G-G--C-A-T-G---C---C-T--AA-C--AC-A-T-G-C--A-A-G--T-C--GA-A-CG-A---------T-G----A-A--G-----------------------------C---C-C-A-G--------------------CTT-G---------------------------C--T--G-G---G-----------------------T-G----G--AA--G-------AG-T-G-G-C-GA-A--C--G-GG--T--G-A-G-T-A-AC-A-C-G-T-G-AG---TAA-C-CT-G--C-C-CTG--AA-C----T-C-T-G-G-G---AT-AA-G--CA------------------C-T-G-…
>ICSZ4EG01BDCTK
A-T-T--G-A-A-C-G-C--T-G-G-C--G-G--C-A-T-G---C---C-T--TG-C--AC-A-T-G-C--A-A-G--T-C--GA-ACGG-----------G-CAG--C-A--T----------------------------GA-T-C-T-A-G--------------------CTT-G---------------------------C--T--A-G-A-T--T------------------G-A-T----G--GC--G-------AG-T-G-G-C-GA-A--C--G-GG--T--G-A-G-T-A-AT-A-C-A-T-C-GG---A-A-C-GT-G--C-C-CTG--TA-G----T-G-G-G-G-G---AT-AA-C--TA------------------G-T-C-…
>ICSZ4EG01BCRFB
G-A-C--G-A-A-C-G-C--T-G-G-C--G-G--C-G-T-G---C---T-T--AA-C--AC-A-T-G-C--A-A-G--T-C--GA-A-CG-A---------G-A-----------------------------------------------C-C--------------------TTC-G---------------------------G--G------------------------------------------TC--T-------AG-T-G-G-C-GC-A--C--G-GG--C--G-C-G-T-A-AC-G-C-G-T-G-GG---A-A-T-CT-G--C-C-CTT--GG-G----T-T-C-G-G-A---AT-AA-C--TC------------------G-C-C-…
>ICSZ4EG01B74N3
A-G-C--G-A-A-C-G-C--T-G-G-C--G-G--C-A-T-G---C---C-T--AA-C--AC-A-T-G-C--A-A-G--T-C--GA-A-CG-A---------G-A-----------------------------------------------C-C--------------------TTC-G---------------------------G--G------------------------------------------TC--T-------AG-T-G-G-C-GC-A--C--G-GG--T--G-C-G-T-A-AC-G-C-G-T-G-GG---A-A-T-CT-G--C-C-CTT--GG-G----T-T-C-G-G-A---AT-AA-C--TC------------------G-C-C-…
>ICSZ4EG01AYDKA
A-A-C--G-A-A-C-G-C--T-G-G-C--G-G--C-A-T-G---C---C-T--AA-C--AC-A-T-G-C--A-A-G--T-C--GA-A-CG-A---------G-A-----------------------------------------------C-T--------------------TTC-G---------------------------G--G------------------------------------------TC--T-------AG-T-G-G-C-GC-A--C--G-GG--T--G-C-G-T-A-AC-G-C-G-T-G-GG---A-A-T-CT-G--C-C-CTT--GG-G----T-T-C-G-G-A---AT-AA-C--TC------------------G-C-C-…
>ICSZ4EG01AWXTA
G-A-T--G-A-A-C-G-C--T-G-G-C--G-G--C-G-T-G---C---C-T--AA-T--AC-A-T-G-C--A-A-G--T-C--GA-G-CG-A---------A-C----A-G--A----------------------------CG-A-G-G-A-G--------------------CTT-G---------------------------C--T--C-C-T-C--T--------------------G-A----C--GT--T-------AG-C-G-G-C-GG-A--C--G-GG--T--G-A-G-T-A-AC-A-C-G-T-G-GA---TAA-C-CT-A--C-C-TAT--AA-G----A-C-T-G-G-G---AT-AA-C--TT------------------C-G-G-…
>ICSZ4EG01APS63
A-A-C--G-A-A-C-G-C--T-G-G-C--G-G--C-A-T-G---C---C-T--AA-C--AC-A-T-G-C--A-A-G--T-C--GA-A-CG-A---------G-A-----------------------------------------------C-C--------------------TTC-G---------------------------G--G------------------------------------------TC--C-------AG-T-G-G-C-GC-A--C--G-GG--T--G-C-G-T-A-AC-G-C-G-T-A-GG---A-A-T-CT-G--C-C-CTT--GG-G----T-T-C-G-G-A---AT-AA-C--TG------------------G-C-C-…
>ICSZ4EG01ALK4F
A-A-C--G-A-A-C-G-C--T-G-G-C--G-G--C-A-T-G---C---C-T--AA-C--AC-A-T-G-C--A-A-G--T-C--GA-A-CG-----------G-CAG--C---------------------------------AC-G-G---A----------------------CTT-----------------------------C-----GGT---C--T------------------G-G-T----G--GC--G-------AG-T-G-G-C-GA-A--C--G-GG--T--G-A-G-T-A-AT-G-T-A-T-C-GG---A-A-C-GT-A--C-C-CTG--TA-G----T-G-G-G-G-G---AT-AA-C--TA------------------G-T-C-…
>ICSZ4EG01A8MG4
A-A-C--G-A-A-C-G-C--T-G-G-C--G-G--C-A-T-G---C---C-T--AA-C--AC-A-T-G-C--A-A-G--T-C--GA-A-CG-A---------G-A-----------------------------------------------C-C--------------------TTC-G---------------------------G--G------------------------------------------TC--T-------AG-T-G-G-C-GC-A--T--G-GG--T--G-C-G-T-A-AC-G-C-G-T-G-GG---A-A-T-CT-G--C-C-CTT--GG-G----T-T-C-G-G-A---AC-AA-C--TC------------------A-C-C-…
>ICSZ4EG01A877U
A-T-T--G-A-A-C-G-CC---G-G-C--G-G--C-A-T-G---C---C-T--TA-C--AC-A-T-G-C--A-A-G--T-C--GA-A-CG-----------G-CAG--C-A--T----------------------------GA-T-C-T-A-G--------------------CTT-G---------------------------C--T--A-G-A-T--T------------------G-A-T----G--GC--G-------AG-T-G-G-C-GA-A--C--G-GG--T--G-A-G-T-A-AT-A-C-A-T-C-GG---A-A-C-GT-G--C-C-CTG--TA-G----T-G-G-G-G-G---AT-AA-C--TA------------------G-T-C-…
>ICSZ4EG01A7EAT
A---T--G-A-A-C-G-C--TA--G-C--G-G--G-A-G-G---C---C-T--AA-C--AC-A-T-G-C--A-A-G--T-C--GA-A-CG-----------G-CAG--C-A--T----------------------------GA-T-C-T-A-G--------------------CTT-G---------------------------C--T--A-G-A-T--T------------------G-A-T----G--GC--G-------AG-T-G-G-C-GA-A--C--G-GG--T--G-A-G-T-A-AT-A-C-A-T-C-GG---A-A-C-GT-G--C-C-CTG--TA-G----T-G-G-G-G-G---AT-AA-C--TA------------------G-T-C-…
>ICSZ4EG01A30US
A-A-C--G-A-A-C-G-C--T-G-G-C--G-G--C-A-T-G---C---C-T--AA-C--AC-A-T-G-C--A-A-G--C-C--GA-A-CG-A---------G-A-----------------------------------------------C-C--------------------TTC-G---------------------------G--G------------------------------------------TC--T-------AG-A-G-G-C-AC-A--C--G-GG--T--G-C-G-T-A-AC-G-C-G-T-G-GG---A-A-T-CT-G--C-C-CTT--GG-G----T-T-C-G-G-A---AT-AA-C--TC------------------G-C-C-…
>ICSZ4EG01A2FL5
G-A-C--G-A-A-C-G-C--T-G-G-C--G-G--C-G-T-G---C---C-T--AA-T--AC-A-T-G-C--A-A-G--T-A--GA-A-CG-C---------T-G----A-A--G----------------------------CT-T-G-G-T-G--------------------CTT-G---------------------------C--A--C-C-G-A--G--------------------C-G----G--AT--G-------AG-T-T-G-C-GA-A--C--G-GG--T--G-A-G-T-A-AC-G-C-G-T-A-GG---TAA-C-CT-G--C-C-TGG--TA-G----C-G-G-G-G-G---AT-AA-C--TA------------------T-T-G-…
>ICSZ4EG01BE0N3
A-T-T--G-A-A-C-G-C--T-G-G-C--G-G--C-A-T-G---C---C-T--TA-C--AC-A-T-G-C--A-A-G--T-C--GA-A-CG-----------G-CAG--C-A--T----------------------------GG-A-A-G-A-G--------------------CTT-G---------------------------C--T--C-T-T-C--T------------------G-A-T----G--GC--G-------AG-T-G-G-C-GA-A--C--G-GG--T--G-A-G-T-A-AA-G-C-A-T-C-GG---A-A-C-GT-A--C-C-GTG--TA-G----T-G-G-G-G-G---AT-AA-C--GT------------------A-G-C-…
>ICSZ4EG01AKNWZ
A-A-C--G-A-A-C-G-C--T-G-G-C--G-G--C-A-T-G---C---C-T--AA-C--AC-A-T-G-C--A-A-G--T-C--GA-A-CG-A---------G-A-----------------------------------------------C-C--------------------TTC-G---------------------------A--G------------------------------------------TC--T-------AG-T-G-G-C-GC-A--C--G-GG--T--G-C-G-T-A-AC-G-C-G-T-G-GG---A-A-T-CT-G--T-C-CTT--GG-G----C-T-C-G-G-A---AT-AA-C--TC------------------G-C-C-…
>ICSZ4EG01ER4PA
A-G-C--G-A-A-C-G-C--T-G-G-C--G-G--C-A-G-G---C---T-T--AA-C--AC-A-T-G-C--A-A-G--T-C--GA-G-CG-G---------G-C---------------------------------------------G-T-A--------------------GCA-A---------------------------T--A--C---------------------------------------GT--C-------AG-C-G-G-C-AG-A--C--G-GG--T--A-A-G-T-A-AC-G-C-G-T-G-GG---A-A-C-GT-A--C-C-TTT--TG-G----T-T-C-G-G-A---AC-AA-C--AC------------------A-G-G-…
>ICSZ4EG01EO5Q3
A-T-T--G-A-A-C-G-C--T-G-G-C--G-G--C-A-T-G---C---C-T--TA-C--AC-A-T-G-C--A-A-G--T-C--GA-A-CG-----------G-CAG--C-A--T----------------------------GA-T-C-T-A-G--------------------CTT-G---------------------------C--T--A-G-A-T--T------------------G-A-T----G--GC--G-------AG-T-G-G-C-GA-A--C--G-GG--T--G-A-G-T-A-AT-A-C-A-T-C-GG---A-A-C-GT-G--C-C-CTG--TA-G----T-G-G-G-G-G---AT-AA-C--TA------------------G-T-C-…
>ICSZ4EG01EN28B
A-A-C--G-A-A-C-G-C--T-G-G-C--G-G--C-A-T-G---C---C-T--AA-C--AC-A-T-G-C--A-A-G--T-T--GA-A-CG-A---------G-A-----------------------------------------------C-C--------------------TTC-G---------------------------G--G------------------------------------------TC--T-------AG-T-G-G-C-GC-A--C--G-GG--T--G-C-G-T-A-AC-G-C-G-T-G-GG---A-A-T-CT-G--C-C-CTT--GG-G----T-T-T-G-G-A---AT-AA-C--TC------------------G-C-C-…
>ICSZ4EG01CL192
A-A-C--G-A-A-C-G-C--T-G-G-C--G-G--C-A-G-G---C---T-T--AA-C--AC-A-T-G-C--A-A-G--T-C--G--A--G-C---------G-C-----------------------------------------------C-C--------------------CGC-A---------------------------A--G-------------------------------------------G--G-------AG-C-G-G-C-AG-A--C--G-GG--T--G-A-G-T-A-AC-G-C-G-T-G-GG---A-A-T-CT-G--C-C-CTT--GG-G----T-T-C-G-G-A---AT-AA-C--TC------------------G-C-C-…
>ICSZ4EG01EIG2J
A-A-C--G-A-A-C-G-C--T-G-G-C--G-G--C-A-T-G---C---C-T--AA-C--AC-A-T-G-C--A-A-G--T-C--GG-A-CG-A---------G-A-----------------------------------------------C-C--------------------TTC-G---------------------------G--G------------------------------------------TC--T-------AG-T-G-G-C-GC-A--C--G-GG--T--G-C-G-T-A-AC-G-C-G-T-G-GG---A-A-T-CT-G--C-C-CTT--GG-G----T-T-C-G-G-A---AT-AA-C--TC------------------G-C-C-…
>ICSZ4EG02H39YJ
A-T-T--G-A-A-C-G-C--T-G-G-C--G-G--C-A-T-G---C---C-T--TA-C--AC-A-T-G-C--A-A-G--T-C--GA-A-CG-----------G-TAA--C----G----------------------------GG-T-C--------------------------CTT-----------------------------C--G--G-G-A----T------------------G-C-C----G--AC--G-------AG-T-G-G-C-GA-A--C--G-GG--T--G-A-G-T-A-AT-A-T-A-T-C-GG---A-A-C-GT-G--C-C-CAG--TA-G----T-G-G-G-G-G---AT-AA-C--TG------------------C-T-C-…
>ICSZ4EG01DZAQW
A-A-C--G-A-A-C-G-C--T-G-G-C--G-G--C-A-T-G---C---C-T--AA-C--AC-A-T-G-C--A-A-G--T-C--GA-A-CG-A---------G-A-----------------------------------------------C-C--------------------TTC-G---------------------------G--G------------------------------------------CC--T-------AG-C-G-G-C-GC-A--C--G-GG--T--G-C-G-T-A-AC-G-C-G-T-G-GG---A-A-T-CC-G--C-C-CTT--GG-G----T-T-C-G-G-A---AT-AA-C--TC------------------G-C-C-…
>ICSZ4EG01DZ8JG
A-A-C--G-A-A-C-G-C--T-G-G-T--G-G--C-A-T-G---C---C-T--AA-C--AC-A-T-G-C--A-A-G--T-C--GA-A-CG-A---------G-A-----------------------------------------------C-C--------------------CTC-G---------------------------G--G------------------------------------------TC--T-------AG-T-G-G-C-GC-A--C--G-GG--T--G-C-G-T-A-AC-A-C-G-T-G-GG---A-A-T-CC-G--C-C-CTT--GG-G----T-T-C-G-G-A---AT-AA-C--TC------------------G-C-C-…
>ICSZ4EG01D1IWX
A-T-T--G-A-A-C-G-C--T-G-G-C--G-G--C-A-T-G---C---C-T--TA-C--AC-A-T-G-C--A-A-G--T-C--GA-A-CG-----------G-TAA--C----G----------------------------GG-T-C--------------------------CTT-----------------------------C--G--G-G-A-T--G------------------C---C----G--AC--G-------AG-T-G-G-C-GA-A--C--G-GG--T--G-A-G-T-A-AT-A-T-A-T-C-GG---A-A-C-GT-G--C-C-CAG--TA-G----T-G-G-G-G-G---AT-AA-C--TG------------------C-T-C-…
>ICSZ4EG01DW32E
A-T-T--G-A-A-C-G-C--T-G-G-C--G-G--C-A-T-G---C---C-T--TA-C--AC-A-T-G-C--A-A-G--T-C--GA-A-CG-----------G-CAG--C-A--C---------------------------------G-G-G-A--------------------GCA-A---------------------------T--C--C-T-------------------------G-G-T----G--GC--G-------AG-T-G-G-C-GA-A--C--G-GG--T--G-A-G-T-A-AT-A-C-A-T-C-GG---A-A-C-GT-G--C-C-CTG--TC-G----T-G-G-G-G-G---AT-AA-C--TA------------------G-T-C-…
>ICSZ4EG01D45XI
G-A-C--G-A-A-C-G-C--T-G-G-C--G-G--C-G-T-G---C---T-T--AA-C--AC-A-T-G-C--A-A-G--T-C--GA-A-CG-G---------A-G----C-A--C----------CCTTG-A-----------AA-G-A-G-T-T--------------------TTC-G---------------------------G--A--C-A-A-T--GGA--GAGG----------A-A-T----G--CT--T-------AG-T-G-G-C-GG-A--C--T-GG--T--G-A-G-T-A-AC-G-C-G-T-G-AG---GAA-C-CT-G--C-C-TTC--CA-G----A-G-G-G-G-G---AC-AA-C--AG------------------T-T-G-…
>ICSZ4EG01D1LLG
G-A-T--G-A-A-C-G-C--T-G-G-C--G-G--C-G-T-G---C---C-T--AA-T--AC-A-T-G-C--A-A-G--T-C--GA-G-CG-A---------A-C----T-G--A----------------------------TT-A-G-A-A-G--------------------CTT-G---------------------------C--T--T-C-T-A--T--------------------G-A----C--GT--T-------AG-C-G-G-C-GG-A--C--G-GG--T--G-A-G-T-A-AC-A-C-G-T-G-GG---CAA-C-CT-G--C-C-TGT--AA-G----A-C-T-G-G-G---AT-AA-C--TT------------------C-G-G-…
>ICSZ4EG01CS3CC
A-T-T--G-A-A-C-G-C--T-G-G-C--G-G--C-A-T-G---C---C-T--AA-C--AC-A-T-G-C--A-A-G--T-C--GA-A-CG-A---------G-A-----------------------------------------------C-C--------------------TTC-G---------------------------G--G------------------------------------------TC--T-------AG-T-G-G-C-GC-A--C--G-GG--T--G-C-G-C-A-AC-G-C-G-T-G-GG---A-A-T-CT-G--C-C-CTT--GG-G----T-T-C-G-G-A---AT-AA-C--TC------------------G-C-C-…
>ICSZ4EG01CRHXC
G-A-C--G-A-A-C-G-C--T-G-G-C--G-G--C-A-T-G---C---C-T--AA-C--AT-A-T-G-C--A-A-G--T-C--GA-A-CG-A---------G-A-----------------------------------------------C-C--------------------TTC-G---------------------------G--G------------------------------------------TC--T-------AG-T-G-G-C-GC-A--C--G-GG--T--G-C-G-T-A-AC-G-C-G-T-G-GG---A-A-T-CT-G--C-C-CTT--GG-G----T-T-C-G-G-A---AT-AA-C--TC------------------G-C-C-…
>ICSZ4EG01COVDP
A-A-C--G-A-A-C-G-C--T-G-G-C--G-G--C-A-T-G---C---C-T--AA-C--AC-A-T-G-C--A-A-G--T-C--GA-A-CG-A---------G-A-----------------------------------------------C-C--------------------CTC-G---------------------------G--G------------------------------------------TC--T-------AG-T-G-G-C-AC-A--C--G-GG--T--G-C-G-C-A-AC-G-C-G-T-G-GG---A-A-T-CT-G--C-C-CTT--GG-G----T-T-C-G-G-A---AT-AA-C--TC------------------G-C-C-…
>ICSZ4EG01CM330
A-A-C--G-A-A-C-G-C--T-G-G-C--G-G--C-A-T-G---C---C-T--AA-C--AC-A-T-G-C--A-A-G--T-C--GA-A-CG-A---------G-A-----------------------------------------------C-C--------------------TTC-G---------------------------G--G------------------------------------------TC--T-------AG-T-G-G-C-GC-A--C--G-GG--T--G-C-G-T-A-AC-G-C-G-T-G-GG---A-A-T-CT-G--C-C-CTT--GG-G----T-T-C-G-G-A---AT-AA-C--TC------------------G-C-C-…
>ICSZ4EG01CM178
A-A-C--G-A-A-C-G-C--T-G-G-C--G-G--C-A-T-G---C---C-T--AA-C--AC-A-T-G-C--A-A-G--T-C--GA-A-CG-A---------G-A-----------------------------------------------C-C--------------------TTC-G---------------------------G--A------------------------------------------TC--T-------AG-T-A-G-C-GC-A--C--G-GG--T--G-C-G-T-A-AC-G-C-G-T-G-GG---A-A-T-CT-G--C-C-CTT--GG-G----C-T-C-G-G-A---AT-AA-C--TC------------------G-C-C-…
>ICSZ4EG01CIXUZ
A-A-C--G-A-A-C-G-C--T-G-G-C--G-G--C-A-T-G---C---C-T--AA-C--AC-A-T-G-C--A-A-G--T-C--GA-A-CG-A---------G-G-----------------------------------------------C-C--------------------TTC-G---------------------------G--G------------------------------------------TC--T-------AG-T-G-G-C-GC-A--C--G-GG--T--G-C-G-T-A-GC-G-C-G-C-G-GG---A-A-T-CT-G--C-C-CTT--GG-G----T-T-C-G-G-A---AT-AA-C--TC------------------G-C-C-…
>ICSZ4EG01BBLI4
A-A-C--G-A-A-C-G-C--T-G-G-C--G-G--C-A-T-G---C---C-T--AA-C--AC-A-T-G-T--A-A-G--T-C--GA-A-CG-A---------G-A-----------------------------------------------C-C--------------------TTC-G---------------------------G--G------------------------------------------TC--T-------AG-T-G-G-C-GC-A--C--G-GA--T--G-C-G-T-A-AC-G-C-G-T-G-GG---A-A-C-CT-G--C-C-CTT--GG-G----T-T-C-G-G-A---AT-AA-C--TC------------------G-C-C-…
>ICSZ4EG01B67TM
G-T-T--G-A-A-C-G-C--T-G-G-C--G-G--C-A-T-G---C---C-T--AA-C--AC-A-T-G-C--A-A-G--T-C--GA-A-CG-A---------G-A-----------------------------------------------C-C--------------------TCC-G---------------------------G--G------------------------------------------TC--T-------AG-T-G-G-C-GC-A--C--G-GG--T--G-C-G-T-A-AC-G-C-G-T-G-GG---A-A-T-CT-G--C-C-CTT--GG-G----T-T-C-G-G-A---AT-AA-C--TC------------------G-C-C-…
>ICSZ4EG01B5TKK
A-A-C--G-A-A-C-G-C--T-G-G-C--G-G--C-A-T-G---C---C-T--AA-C--AC-A-T-G-C--A-A-G--T-C--GA-A-CG-AG--------G-A-----------------------------------------------C-C--------------------TTC-G---------------------------G--G------------------------------------------TCG-T-------AG-T-G-G-C-GC-A--C--G-GG--T--G-C-G-T-A-AC-G-C-GTT-G-GG---A-A-T-CT-G--C-C-CTT--GG-G----T-T-C-G-G-A--AGT-AA-C--TC------------------G-C-C-…
>ICSZ4EG01AXMDO
A-A-C--G-A-A-C-G-C--T-G-G-C--G-G--C-A-T-G---C---C-T--AA-C--AC-A-T-G-C--A-A-G--T-C--GA-A-CG-A---------G-A-----------------------------------------------C-C---------------------TC-----------------------------G--G------------------------------------------TC--T-------AG-T-G-G-C-GC-A--C--G-GG--T--G-C-G-T-A-AT-G-C-G-T-G-GG---A-A-T-CT-G--C-C-CTT--GG-G----T-T-C-G-G-A---AT-AA-C--TC------------------G-C-C-…
>ICSZ4EG01A356B
A-A-C--G-A-A-C-G-C--T-G-G-C--G-G--C-A-T-G---C---C-T--AA-C--AC-G-T-G-C--A-A-G--T-C--GA-A-CG-A---------G-A-----------------------------------------------C-C--------------------TTC-G---------------------------G--G------------------------------------------TCG-T-------AG-T-G-G-C-GC-A--C--G-GG--T--G-C-G-T-A-AC-G-C-G-T-G-GG---A-A-T-CT-G--C-C-CTT--GG-G----C-T-C-G-G-A---AT-AA-C--TC------------------G-C-C-…
>ICSZ4EG01EWYE5
A-T-T--G-A-A-C-G-C--T-G-G-C--G-G--C-A-T-G---C---C-T--TA-C--AC-A-T-G-C--A-A-G--T-C--GA-A-CG-----------G-CAG--C-A--C---------------------------------G-G-A-C--------------------TTC-G---------------------------G--T--C-T-------------------------G-G-T----G--GC--G-------AG-T-G-G-C-GA-A--C--G-GG--T--G-A-G-T-A-AT-G-T-A-T-C-GG---A-A-C-GT-A--C-C-TTT--CA-G----T-G-G-G-G-G---AT-AA-C--GT------------------A-G-C-…
>ICSZ4EG01BBZIP
A-A-C--G-A-A-C-G-C--T-G-G-C--G-G--C-A-T-G---C---C-T--AA-C--AC-A-T-G-C--A-A-G--T-C--GA-A-CG-A---------G-A-----------------------------------------------C-C--------------------TTC-G---------------------------G--G------------------------------------------TC--T-------AG-T-G-G-C-GC-A--C--G-GG--T--G-C-G-T-A-AC-G-C-G-T-G-GG---A-A-T-CT-G--C-C-CTT--GG-G----T-T-T-G-G-A---AT-AA-C--TC------------------G-C-C-…
>ICSZ4EG01ESQ8A
A-A-C--G-A-A-C-G-C--T-G-G-C--G-G--C-A-T-G---C---C-T--AA-C--AC-A-T-G-C--A-A-G--T-C--GA-A-CG-A---------G-A-----------------------------------------------C-C--------------------TTC-G---------------------------G--G------------------------------------------TC--T-------AG-T-G-G-C-GC-A--C--G-GG--T--G---T-T-A-AC-G-C-G-T-G-GG---A-A-T-CT-G--C-C-CTT--GG-G----T-T-C-G-G-A---AT-AG-C--TC------------------G-C-C-…
>ICSZ4EG01EBK96
A-A-C--G-G-A-C-G-C--T-G-G-C--G-G--C-A-T-G---C---C-T--AA-C--AC-A-T-G-C--A-A-G--T-C--GA-A-CG-A---------G-A-----------------------------------------------C-C--------------------TTC-G---------------------------G--G------------------------------------------TC--T-------AG-T-G-G-C-GC-A--C--G-GG--T--G-C-G-T-A-AC-G-C-G-T-G-GG---A-A-T-CT-A--C-C-CTT--GG-G----T-T-C-G-G-A---AT-AA-C--TC------------------G-C-C-…
>ICSZ4EG01DV93L
G-A-C--G-A-A-C-G-C--T-G-G-C--G-G--C-A-T-G---C---C-T--AA-C--AC-A-T-G-C--A-A-G--T-C--GA-A-CG-A---------G-A-----------------------------------------------C-C--------------------TTC-G---------------------------G--G------------------------------------------TC--T-------AG-T-G-G-C-GC-A--C--G-GG--T--G-C-G-T-A-AC-G-C-G-T-G-GG---A-A-T-CT-G--C-T-CTT--GG-G----T-T-C-G-G-A---AT-AA-C--TC------------------G-C-C-…
>ICSZ4EG01DTSGL
G-A-T--G-A-A-C-G-C--T-G-G-C--G-G--C-A-T-G---C---C-T--AA-T--AC-A-T-G-C--A-A-G--T-C--GA-A-CG-A---------G-A-----------------------------------------------C-C--------------------TTC-G---------------------------G--G------------------------------------------TC--T-------AG-T-G-G-C-GC-A--C--G-GG--T--G-C-G-T-A-AC-G-C-G-T-G-GG---A-A-T-CT-G--C-C-CTT--GG-G----T-T-C-G-G-A---AT-AA-C--TC------------------G-C-C-…
>ICSZ4EG01DS774
A-A-C--G-A-A-C-G-C--T-G-G-C--G-G--C-A-T-G---C---C-T--AA-C--AC-A-T-G-C--A-A-G--T-C--GA-A-CG-A---------G-A-----------------------------------------------C-C--------------------TTC-G---------------------------G--G------------------------------------------TC--T-------AG-T-G-G-C-GC-A--C--G-GG--T--G-C-G-T-A-AC-G-C-G-T-G-GG---A-A-T-CT-G--C-C-CTT--GG-G----T-C-C-G-G-A---GT-AA-C--TC------------------G-C-C-…
>ICSZ4EG01DO37M
A-A-C--G-A-A-C-G-C--T-G-G-C--G-G--C-A-T-G---C---C-T--AA-C--AC-A-T-G-C--A-G-G--T-C--GA-A-CG-A---------G-A-----------------------------------------------C-C--------------------TTC-G---------------------------G--G------------------------------------------TC--T-------AG-T-G-G-C-GC-A--C--G-GG--T--G-C-G-T-A-AC-G-C-G-T-G-GG---A-A-T-CT-G--C-C-CTT--GA-G----T-T-C-G-G-A---AT-AA-C--TC------------------G-C-C-…
>ICSZ4EG01DKMWX
A-T-T--G-A-A-C-G-C--T-G-G-C--G-G--C-A-T-G---C---C-T--TA-C--AC-A-T-G-C--A-A-G--T-C--GA-A-CG-----------G-CAG--C-AT-G----------------------------------GTCTAGC------------------TTGCTA---------------------------G--AT-T---------------------------G-A-T----G--GC--G-------AG-T-G-G-C-GA-A--C--G-GG--T--G-A-G-T-A-AT-A-C-A-T-C-GG---A-A-C-GT-G--C-C-CTG--TA-G----T-G-G-G-G-G---AT-AA-C--GG------------------A-G-C-…
>ICSZ4EG01DIWI4
A-A-C--G-A-A-C-G-C--T-G-G-C--G-G--C-A-T-G---C---C-T--AA-C--AC-A-T-G-C--A-A-G--T-C--GA-A-CG-A---------G-A-----------------------------------------------C-C--------------------TTC-G---------------------------G--G------------------------------------------TC--T-------AG-T-G-G-C-GC-A--C--G-GG--T--G-C-G-T-A-AC-G-C-G-T-G-GA---A-A-T-CT-G--C-C-CTT--GG-G----T-T-C-G-G-A---AT-AA-C--TC------------------G-C-C-…
>ICSZ4EG01DCKRF
A-A-C--G-A-A-C-G-C--T-G-G-C--G-G--C-A-T-G---C---C-T--AA-C--AC-A-T-G-C--A-A-G--T-C--GA-A-CG-A---------G-A-----------------------------------------------C-C--------------------TTC-G---------------------------G--G------------------------------------------TC--T-------AG-T-G-G-C-GC-A--C--G-GG--T--G-C-G-T-A-AC-G-C-G-T-G-GG---A-A-T-CT-G--C-C-CTT--GG-G----T-T-C-G-G-A---AT-AA-C--TC------------------G-C-T-…
>ICSZ4EG01DBZ0M
A-A-C--G-A-A-C-G-C--T-G-G-C--G-G--C-A-T-G---C---C-T--AA-C--AC-A-T-G-C--A-A-G--T-C--GA-A-CG-A---------G-A-----------------------------------------------C-C--------------------TTC-G---------------------------G--G------------------------------------------TC--T-------AG-T-G-G-C-GC-G--C--G-GG--T--G-C-G-T-A-AC-G-C-G-T-G-GG---A-A-T-CC-G--C-C-CTT--GG-G----T-T-C-G-G-A---AT-AA-C--TC------------------G-C-C-…
>ICSZ4EG01D70U3
A-A-C--G-A-A-C-G-C--T-G-G-C--G-G--C-A-T-G---C---C-C--AA-C--AC-A-T-G-C--A-A-G--T-C--GA-A-CG-A---------G-A-----------------------------------------------C-C--------------------TTC-G---------------------------G--G------------------------------------------TC--T-------AG-T-G-G-C-GC-A--C--G-GG--T--G-C-G-T-A-AC-G-C-G-T-G-GG---A-A-T-CC-G--C-C-CTT--GG-G----T-T-C-G-G-A---AT-AA-C--TC------------------G-C-C-…
>ICSZ4EG01D6SQG
A-A-C--G-A-A-C-G-C--T-G-G-C--G-G--C-A-T-G---C---C-T--AA-C--AC-A-T-G-C--A-A-G--T-C--GA-A-CG-A---------G-A-----------------------------------------------C-C--------------------TTC-G---------------------------G--G------------------------------------------TCG-T-------AG-T-G-G-C-GC-A--C--G-GG--T--G-C-G-T-A-AC-G-C-G-TGG-GG---A-A-T-CT-G--C-C-CTT--GG-G----T-T-CGG-G-A---AT-AA-C--TC------------------G-C-C-…
>ICSZ4EG01D3ASH
A-G-T--G-A-A-C-G-C--T-G-G-C--G-G--T-A-G-G---C---C-T--AA-C--AC-A-T-G-C--A-A-G--T-C--GA-A-CG-----------G-CAG--C-A--C----------------A-----------G--G-A-G-A-G--------------------CTT-G---------------------------C--T--C-T-C----TG-----------------G-G-T----G--GC--G-------AG-T-G-G-C-GG-A--C--G-GG--T--G-A-G-G-A-AT-A-C-A-T-C-GG---A-A-T-CT-A--C-T-CTG--TC-G----T-G-G-G-G-G---GT-AA-C--GT------------------A-G-G-…
>ICSZ4EG01CVO0H
A-A-C--G-A-A-C-G-C--T-G-G-C--G-G--C-A-T-G---C---C-T--AA-C--AC-A-T-G-C--A-A-G--T-C--GA-A-CG-A---------G-A-----------------------------------------------C-C--------------------TTC-G---------------------------G--G------------------------------------------TC--T-------AG-T-G-G-C-AC-A--C--G-GG--T--G-C-G-T-A-AC-G-C-G-T-G-GG---A-A-T-CT-G--C-C-CTT--GG-G----T-T-CGG-G-A---AT-AA-C--TC------------------G-C-C-…
>ICSZ4EG01CU4SR
A-A-C--G-A-A-C-G-C--T-G-G-C--A-G--C-A-T-A---C---C-T--AA-C--AC-A-T-G-C--A-A-G--T-C--GA-A-CG-A---------G-A-----------------------------------------------C-C--------------------TTC-G---------------------------G--G------------------------------------------TC--T-------AG-T-G-G-C-GC-A--C--G-GG--T--G-C-G-T-A-AC-G-C-G-T-G-GG---A-A-T-CT-G--C-C-CTT--GG-G----T-T-C-G-G-A---AT-AA-C--TC------------------G-C-C-…
>ICSZ4EG01CR8D6
A-A-C--G-A-A-C-G-C--T-G-G-C--G-G--C-A-T-G---C---C-T--AA-C--AC-A-T-G-C--A-A-G--T-C--GA-A-CG-A---------G-G-----------------------------------------------C-C--------------------TTC-G---------------------------G--G------------------------------------------TC--T-------AG-T-G-G-C-GC-A--C--G-GG--T--G-C-G-T-A-AC-G-C-G-T-G-GG---A-C-T-CT-G--T-C-CTT--GG-G----T-T-C-G-G-A---AT-AA-C--TC------------------G-C-C-…
>ICSZ4EG01CJBDU
A-T-T--G-A-A-C-G-C--T-G-G-C--G-G--C-A-T-G---C---C-T--TA-C--AC-A-T-G-C--A-A-G--T-C--GA-A-CG-----------G-CAG--C-A--T----------------------------GA-T-C-T-A-G--------------------CTT-G---------------------------C--T--A-G-A-T--T------------------G-A-T----G--GC--G-------AG-T-G-G-C-GA-A--C--G-GG--T--G-A-G-T-A-AT-A-C-A-T-C-GG---A-A-C-GT-G--C-C-CTG--TA-G----T-G-G-G-G-G---AT-AA-C--TA------------------G-T-C-…
>ICSZ4EG01CGHC4
A-A-C--G-A-A-C-G-C--T-G-G-C--G-G--C-A-T-G---C---C-T--TA-C--AC-A-T-G-C--A-A-G--T-C--GA-A-CG-----------G-TAA--C-A--G-----------------------------------G-T-C--------------------TTC-G---------------------------G--A--T---------------------------G-C-T----G--AC--G-------AG-T-G-G-C-G--A--C--G-GG--T--G-A-G-T-A-AT-A-C-A-T-C-GG---A-A-C-GT-G--C-C-CGA--TC-G----T-G-G-G-G-G---AT-AA-C--GA------------------A-G-C-…
>ICSZ4EG01CBZJU
A-A-C--G-A-A-C-A-C--T-G-G-C--G-G--C-A-T-G---C---C-T--AA-C--AC-A-T-G-C--A-A-G--T-C--GA-A-CG-A---------G-A-----------------------------------------------C-C--------------------TTC-G---------------------------G--G------------------------------------------TC--T-------AG-T-G-G-C-GC-A--C--G-GG--T--G-C-G-T-A-AC-G-C-G-T-G-GG---A-A-T-CT-G--C-C-CTT--GG-G----T-T-C-G-G-A---AT-AA-C--TC------------------G-C-C-…
>ICSZ4EG01C649P
A-A-C--G-A-A-C-G-C--T-G-G-C--G-G--C-A-T-G---C---C-T--AA-C--AC-A-T-G-C--A-A-G--T-C--GA-G-CG-A---------G-G-----------------------------------------------C-C--------------------TTC-G---------------------------G--G------------------------------------------TC--T-------AG-T-G-G-C-GC-A--C--G-GG--T--G-C-G-T-A-AC-G-C-G-T-G-GG---A-A-T-CT-G--C-C-CTT--GG-G----T-T-C-G-G-A---AT-AA-C--TC------------------G-C-C-…
>ICSZ4EG01C0KQ6
A-A-C--G-A-A-C-G-C--T-G-G-C--G-G--C-A-T-G---C---C-T--AA-C--AC-A-T-G-C--A-A-G--T-C--GA-A-CG-A---------G-A-----------------------------------------------C-C--------------------TTC-G---------------------------G--G------------------------------------------TC--T-------AG-T-G-G-C-GC-A--T--G-GG--T--G-C-G-T-A-AC-G-T-G-T-G-GG---A-A-T-CT-G--C-C-CTT--GG-G----T-T-C-G-G-A---AT-AA-C--TC------------------G-C-C-…
>ICSZ4EG01BUI30
G-A-C--G-A-A-C-G-C--T-G-G-C--G-G--C-A-T-G---C---C-T--AA-C--AC-A-T-G-C--A-A-G--T-C--GA-A-CG-A---------G-A-----------------------------------------------C-C--------------------TTC-G---------------------------G--G------------------------------------------TC--T-------AG-T-A-G-C-GC-A--C--G-GG--T--G-C-G-T-A-AC-G-C-G-T-G-GG---A-A-T-CT-G--C-C-CTT--GG-G----T-T-C-G-G-A---AT-AA-C--TC------------------G-C-C-…
>ICSZ4EG01BN59E
A-T-A--G---A-----C--T-G-G-C--G-G--C-A-T-G---C---C-T--TA-C--AC-A-T-G-C--A-A-G--T-C--GA-A-CG-----------G-CAG--C-A--T----------------------------GA-T-C-T-A-G--------------------CTT-G---------------------------C--T--A-G-A-T--T------------------G-A-T----G--GC--G-------AG-T-G-G-C-GA-A--C--G-GG-----G-A-G-T-A-AT-A-C-A-T-C-GG---A-A-C-GT-G--C-C-CTG--TA-G----T-G-G-G-G-G---AT-AA-C--TA------------------G-T-C-…
>ICSZ4EG01BJOOC
A-T-T--G-A-A-C-G-C--T-G-G-C--G-G--C-A-T-G---C---C-T--TA-C--AC-A-T-G-C--A-A-G--T-C--GA-A-CG-----------G-CAG--C-A--T----------------------------GA-T-C-T-A-G--------------------CTT-G---------------------------C--T--A-G-A-T--T------------------G-A-T----G--GC--G-------AG-T-G-G-C-GA-A--C--G-GG--T--G-A-G-T-A-AT-A-C-A-T-C-GG---A-A-C-GT-G--C-C-CTG--TA-G----T-G-G-G-G-A---GT-AA-C--TA------------------G-T-C-…
>ICSZ4EG01BCG0J
G-A-C--G-A-A-C-G-C--T-G-G-C--G-G--C-A-T-G---C---C-T--AA-C--AC-A-T-G-C--A-A-G--T-C--GA-A-CG-A---------G-A-----------------------------------------------C-C--------------------TTC-G---------------------------G--G------------------------------------------CC--T-------AG-T-G-G-C-GC-A--C--G-GG--T--G-C-G-T-A-AC-G-C-G-T-G-GG---A-A-T-CT-G--C-C-CTT--GG-G----T-T-C-G-G-A---AT-AA-C--TC------------------G-C-C-…
>ICSZ4EG01B1CLV
A-A-C--G-A-A-C-G-C--T-G-G-C--G-G--C-A-G-G---C---T-T--AA-C--AC-A-T-G-C--A-A-G--T-C--GA-G-CG-C---------C-C-------------------------------------------------C--------------------GCA-A---------------------------G---------------------------------------------G---G-------AG-C-G-G-C-AG-A--C--G-GG--T--G-A-G-T-A-AC-G-C-G-T-G-GG---A-A-T-CT-A--C-C-CAT--CA-C----T-A-C-G-G-A---AC-AA-C--TC------------------C-G-G-…
>ICSZ4EG01AZC4L
A-A-C--G-A-A-C-A-C--T-G-G-C--G-G--C-A-T-G---C---C-T--AA-C--AC-A-T-G-C--A-A-G--T-C--GA-A-CG-A---------G-A-----------------------------------------------C-C--------------------TTC-G---------------------------G--G------------------------------------------TC--C-------AG-T-G-G-C-GC-A--C--G-GG--T--G-C-G-T-A-AC-G-C-G-T-G-GG---A-A-T-CT-G--C-C-CTT--GG-G----T-T-C-G-G-A---AT-AA-C--TC------------------G-C-C-…
>ICSZ4EG01AY2BE
G-A-T--G-A-A-C-G-C--T-G-G-C--G-G--C-A-T-G---C---C-T--AA-T--AC-A-T-G-C--A-A-G--T-C--GA-A-CG-A---------A-G----T-T--T----------------T-----------TA-G-GAA-A-G--------------------CTT-G---------------------------CT-T--T-C-C-A--AAA------------------A-G----A--CT--T-------AG-T-G-G-C-GA-A--C--G-GG--T--G-A-G-T-A-AC-A-C-G-T-A-GA---TAA-C-CT-G--C-C-CAT--GT-G----C-C-C-G-G-G---AT-AA-C--TG------------------C-T-G-…
>ICSZ4EG01AXAOT
A-T-T--G-A-A-C-G-C--T-G-G-C--G-G--C-A-T-G---C---C-T--AA-C--AC-A-T-G-C--A-A-G--T-C--GA-A-CG-A---------G-A-----------------------------------------------C-C--------------------TTC-G---------------------------G--G------------------------------------------TC--T-------AG-T-G-G-C-GC-A--C--G-GG--T--G-C-G-T-A-AC-G-C-G-T-G-GG---A-A-T-CT-G--C-C-CTT--GG-G----T-T-C-G-G-A---AT-AA-C--TC------------------G-C-C-…
>ICSZ4EG01AV7I5
G-A-T--G-A-A-C-G-C--T-A-G-C--G-G--G-A-G-G---C---C-T--AA-C--AC-A-T-G-C--A-A-G--T-C--GA-A-CG-A---------G-A-----------------------------------------------C-C--------------------TTC-G---------------------------G--G------------------------------------------TC--T-------AG-T-G-G-C-GC-A--C--G-GG--T--G-C-G-T-A-AC-G-C-G-T-G-GG---A-A-T-CT-G--C-C-CTT--GG-G----T-T-C-G-G-A---AT-AA-C--TC------------------G-C-C-…
>ICSZ4EG01AUPDR
A-A-C--G-A-A-C-G-C--T-G-G-C--G-G--C-A-C-G---C---C-T--AA-C--AC-A-T-G-C--A-A-G--T-C--GA-A-CG-G---------G-A-----------------------------------------------C-C--------------------TTC-G---------------------------G--G------------------------------------------TC--T-------AG-T-G-G-C-GC-A--C--G-GG--T--G-C-G-T-A-AC-G-C-G-T-G-GG---A-A-T-CT-G--C-C-CTT--GG-G----T-C-C-G-G-A---AT-AA-C--TC------------------G-C-C-…
>ICSZ4EG01APBDF
A-A-C--G-A-A-C-G-C--T-G-G-C--G-G--C-A-T-G---C---C-T--AA-C--AC-A-T-G-C--A-A-G--T-C--GA-G-CG-A---------G-A-----------------------------------------------C-C--------------------TTC-G---------------------------G--G------------------------------------------TC--T-------AG-T-G-G-C-GC-A--C--G-GG--T--G-C-G-T-A-AC-G-C-G-T-G-GG---A-A-T-CT-G--C-C-CTT--GG-G----T-T-C-G-G-A---AT-AA-C--TCG-----------------G-C-C-…
>ICSZ4EG01ALF0M
A-T-T--G-A-A-C-G-C--T-G-G-C--G-G--C-A-T-G---C---C-T--TA-C--AC-A-T-G-C--A-A-G--T-C--GA-A-CG-----------G-TAA--C-A--G-----------------------------------G-T-C--------------------TTC-G---------------------------G--A--T---------------------------G-C-T----G--AC--G-------AG-T-G-G-C-GA-A--C--G-GG--T--G-A-G-T-A-AT-A-C-A-T-C-GG---A-G-C-GT-G--C-C-CGA--TC-G----T-G-G-G-G-G---AT-AA-C--GA------------------G-G-C-…
>ICSZ4EG01AKXCD
A-A-C--G-A-A-C-G-C--T-G-G-C--G-G--C-A-T-G---C---C-T--AA-C--AC-A-T-G-C--A-A-G--C-C--GA-A-CG-A---------G-A-----------------------------------------------C-C--------------------TTC-G---------------------------G--G------------------------------------------TC--T-------AG-T-G-G-C-GC-A--C--G-GG--T--G-C-G-T-A-AC-G-C-G-T-G-GG---A-A-T-CT-G--C-C-CTT--GG-G----T-T-C-G-G-A---AT-AA-C--TC------------------G-C-C-…
>ICSZ4EG01AK0KP
A-A-C--G-A-A-C-G-C--T-G-G-C--G-G--C-A-T-G---C---C-T--AA-C--AC-A-T-G-C--A-A-G--T-C--GA-A-CG-A---------G-A-----------------------------------------------C-C--------------------TTC-G---------------------------G--G------------------------------------------TC--T-------AG-T-G-G-C-GC-A--C--G-GG--T--G-C-G-T-A-AC-G-C-G-C-G-GG---A-A-T-CT-G--C-C-CTT--GG-G----T-T-C-G-G-A---AT-AA-C--TC------------------G-C-C-…
>ICSZ4EG01BHBDX
G-A-T--G-A-A-C-G-C--T-G-G-C--G-G--C-G-T-G---C---T-T--AA-C--AC-A-T-G-C--A-A-G--T-C--GA-A-CG-----------G-AA---A-G--G-----------------------------C-T-C-C-T-G--------------------CTT-G---------------------------C--AG-G---G-G-----------------------T-A----C--TC--G-------AG-T-G-G-C-GA-A--C--G-GG--T--G-A-G-T-A-AC-A-C-G-T-G-GG---TGA-T-CT-G--C-C-CTG--CA-C----T-T-C-G-G-G---AT-AA-G--CC------------------T-G-G-…
>ICSZ4EG01ETM6G
G-A-T--G-A-A-C-G-C--T-A-G-C--G-A--C-A-G-G---C---C-T--AA-C--AC-A-T-G-C--A-A-G--T-C--GA-A-CG-A---------G-A-----------------------------------------------C-C--------------------TTC-G---------------------------G--G------------------------------------------TC--T-------AG-T-G-G-C-GC-A--C--G-GG--T--G-C-G-T-G-AC-G-C-G-T-G-GG---A-A-T-CT-G--C-C-CTT--GG-G----T-T-C-G-G-A---AT-AA-C--TC------------------G-C-C-…
>ICSZ4EG01DANGC
G-A-T--G-A-A-C-G-C--T-G-G-C--G-G--C-G-T-G---C---T-T--AA-C--AC-A-T-G-C--A-A-G--T-C--GA-A-CG-----------G-AA---A-G--G-----------------------------CTC-C---T-G--------------------CTT-G---------------------------C--AG---G-G-G-----------------------T-A----C--TC--G-------AG-T-G-G-C-GA-A--C--G-GG--T--G-A-G-T-A-AC-A-C-G-T-G-GG---TGA-T-CT-G--C-C-CTG--CA-C----T-T-C-G-G-G---AT-AA-G--CC------------------T-G-G-…
>ICSZ4EG01C4L6A
A-G-C--G-A-A-C-G-C--T-G-G-C--G-G--C-A-G-G---C---T-T--AA-C--AC-A-T-G-C--A-A-G--T-C--GA-A-CG-A---------G-A-----------------------------------------------C-C--------------------TTC-G---------------------------G--G------------------------------------------TC--T-------AG-T-G-G-C-GC-A--C--G-GG--T--G-C-G-T-A-AC-G-C-G-T-G-GG---A-A-T-CT-G--C-C-CTT--GG-G----T-T-C-G-G-A---AT-AA-C--TC------------------G-C-C-…
>ICSZ4EG01C0NZF
G-A-T--G-A-A-C-G-C--T-G-G-C--G-G--C-G-T-G---C---T-T--AA-C--AC-A-T-G-C--A-A-G--T-C--GA-A-CG-----------G-AA---A-G--G-----------------------------C-T-C-C-T-G--------------------CTT-G---------------------------C--A--G-G-G-G-----------------------T-A----C--TC--G-------AG-T-G-G-C-GA-A--C--G-GG--T--G-A-G-T-A-AC-A-C-G-T-G-GG---TGA-T-CT-G--C-C-CTG--CA-C----T-T-C-G-G-G---AT-AA-G--CC------------------T-G-G-…
>ICSZ4EG01EN9H0
G-A-T--G-A-A-C-G-C--T-G-G-C--G-G--C-G-T-G---C---T-T--AA-C--AC-A-T-G-C--A-G-G--T-C--GA-A-CG-----------G-AA---A-G--A-----------------------------C-C-T-C-T-G--------------------CTT-G---------------------------C--A--G-G-G-G-----------------------T-A----C--TC--G-------AG-T-G-G-C-GA-A--C--G-GG--T--G-A-G-T-A-AC-A-C-G-T-G-GG---TGA-T-CT-G--C-C-CTG--CA-C----T-T-C-G-G-G---AT-AA-G--CC------------------T-G-G-…
>ICSZ4EG01C39M1
A-T-T--G-A-A-C-G-C--T-G-G-C--G-G--C-A-T-G---C---C-T--TA-C--AC-A-T-G-C--A-A-G--T-C--GA-A-CG-----------G-CAG--C-A--T----------------------------GA-T-C-T-A-G--------------------CTT-G---------------------------C--T--A-G-A-T--T------------------G-A-T----G--GC--G-------AG-T-G-G-C-GA-A--C--G-GG--T--G-A-G-T-A-AT-A-C-A-T-C-GG---A-A-C-GT-G--C-C-CTG--TA-G----T-G-G-G-G-G---AT-AA-C--TA------------------G-T-C-…
>ICSZ4EG01DCEOG
A-T-T--G-A-A-C-G-C--T-G-G-C--G-G--C-A-T-G---C---C-T--TA-C--AC-A-T-G-C--A-A-G--T-C--GA-A-CG-----------G-CAG--C-A--T---------------------------------GATCT-A--------------------GC--T---------------------------T--G--C-TA----------------------GATTGAT----G--GC--G-------AG-T-G-G-C-GA-A--C--G-GG--T--G-A-G-T-A-AT-A-C-A-T-C-GG---A-A-C-GT-G--C-C-CAG--TA-G----T-G-G-G-G-G---AT-AA-C--TG------------------C-T-C-…
>ICSZ4EG01D14Z6
A-T-T--G-A-A-C-G-C--T-G-G-C--G-G--C-A-T-G---C---C-T--TA-C--AC-A-T-G-C--A-A-G--T-C--GA-A-CG-----------G-TAA--CGG--G-------------------------------------TCC--------------------TTCGG---------------------------G--A--T---------------------------G-C-C----G--AC--G-------AG-T-G-G-C-GA-A--C--G-GG--T--G-A-G-T-A-AT-A-T-A-T-C-GG---A-A-C-GT-G--C-C-CGA--TC-G----T-G-G-G-G-G---AT-AA-C--GA------------------G-G-C-…
>ICSZ4EG01CL6DU
A-G-T--G-A-A-C-G-C--T-G-G-C--G-G--T-A-G-G---C---C-T--AA-C--AC-A-T-G-C--A-A-G--T-C--GA-A-CG-A---------G-A-----------------------------------------------C-C--------------------TTC-G---------------------------G--G------------------------------------------TC--T-------AG-T-G-G-C-GC-A--C--G-GG--T--G-C-G-T-A-AC-G-C-G-T-G-GG---A-A-T-CT-G--C-C-CTT--GG-G----T-T-C-G-G-A---AT-AA-C--TC------------------G-C-C-…
>ICSZ4EG01C8JGT
A-A-C--G-A-A-C-G-C--T-G-G-C--G-G--C-A-T-G---C---C-T--AA-C--AC-A-T-G-C--A-G-G--T-C--GA-A-CG-G---------G-A-----------------------------------------------C-C--------------------TTC-G---------------------------G--G------------------------------------------TC--T-------AG-T-G-G-C-GC-A--C--G-GG--T--G-C-G-T-A-AC-G-C-G-T-G-GG---T-A-T-CT-G--C-C-CTT--GG-G----T-T-C-G-G-A---AT-AA-C--TC------------------G-C-C-…
>ICSZ4EG01BMZBZ
A-A-C--G-A-A-C-G-C--T-G-G-C--G-G--C-A-T-G---C---C-T--AA-C--AC-A-T-G-C--A-A-G--T-C--GA-A-CG-A---------G-A-----------------------------------------------C-C--------------------TTC-G---------------------------G--G------------------------------------------TC--T-------AG-T-G-G-C-GC-A--C--G-GG--T--G-C-G-T-A-AC-G-C-G-T-G-GG---A-A-T-CT-G--C-C-CTT--GG-G----T-T-C-G-G-A---AT-AA-C--TC------------------G-C-C-…
>ICSZ4EG01A7KC1
A-A-C--G-A-A-C-G-C--T-G-G-C--G-G--C-A-T-G---C---C-T--AA-C--AC-A-T-G-C--A-A-G--T-C--GA-G-CG-A---------G-A-----------------------------------------------C-C--------------------TTC-G---------------------------G--G------------------------------------------TC--T-------AG-T-G-G-C-GC-A--C--G-GG--T--A-C-A-T-A-AC-G-C-G-T-G-GG---A-A-T-CT-G--C-C-CTT--GG-G----T-T-C-G-G-A---AT-AA-C--TC------------------G-C-C-…
>ICSZ4EG01C9IVD
A-T-T--G-A-A-C-G-C--T-G-G-C--G-G--C-A-T-G---C---C-T--TA-C--AC-A-T-G-C--A-A-G--T-C--GA-ACGGTAACGG-----G-T-----------------------------------------------C-C--------------------TTC-G---------------------------G--GA------------------------------------TGCCGAC--G-------AG-T-G-G-C-GA-A--C--G-GG--T--G-A-G-T-A-AC-G-C-G-T-G-GG---A-A-T-CT-G--C-C-CTT--GG-G----T-T-C-G-G-A---AT-AA-C--TC------------------G-C-C-…
>ICSZ4EG01EVKQV
G-A-C--G-A-A-C-G-C--T-G-G-C--G-G--C-G-T-G---C---T-T--AA-C--AC-A-T-G-C--A-A-G--T-C--GA-A-CG-----------G-AA---A-G--G-----------------------------C-C-C-CTT-G--------------------CTT-G---------------------------CA-A--G-G-G-G-----------------------T-A----C--TC--G-------AG-T-G-G-C-GA-A--C--G-GG--T--G-A-G-T-A-AC-A-C-G-T-G-GG---TGA-T-CT-G--C-C-TTG--TA-C----T-C-T-G-G-G---AT-AA-G--CT------------------T-G-G-…
>ICSZ4EG02GOLUU
A-T-T--G-A-A-C-G-C--T-G-G-C--G-G--C-A-T-G---C---C-T--TA-C--AC-A-T-G-C--A-A-G--T-C--GA-A-CG-----------G-TAA--C----------------------------------G-G-G---T-C--------------------CTT-----------------------------C------GG-G-A--T------------------G-C-C----G--AC--G-------AG-T-G-G-C-GA-A--C--G-GG--T--G-A-G-T-A-AT-A-T-A-T-C-GG---A-A-C-GT-G--C-C-CTG--TA-G----T-G-G-G-G-G---AT-AA-C--TA------------------G-T-C-…
>ICSZ4EG01EQ50U
A-A-C--G-A-A-C-G-C--T-G-G-C--G-G--C-A-T-G---C---C-T--AA-T--AC-A-T-G-C--A-A-G--T-C--GA-A-CG-A---------G-A-----------------------------------------------T-C--------------------TTC-G---------------------------G--A------------------------------------------TC--T-------AG-T-G-G-C-GC-A--C--G-GG--T--G-C-G-T-A-AC-G-C-G-T-G-GG---A-A-T-CT-G--C-C-CTT--GG-G----T-T-C-G-G-A---AT-AA-C--AG------------------T-T-A-…
>ICSZ4EG01EKOKG
A-T-T--G-A-A-C-G-C--T-G-G-C--G-G--C-A-T-G---C---C-T--TA-C--AC-A-T-G-C--A-A-G--T-C--GA-A-CG-----------G-CAG--C-A--T----------------------------GA-T-C-T-A-G--------------------CTT-G---------------------------C--T--A-G-A-T--T------------------G-A-T----G--GC--G-------AG-T-G-G-C-GA-A--C--G-GG--T--G-A-G-T-A-AT-A-C-A-T-C-GG---A-A-C-GT-G--C-C-CTG--TA-G----T-G-G-G-G-G---AT-AA-C--TA------------------G-T-C-…
>ICSZ4EG01EHXLO
G-A-C--G-A-A-C-G-C--T-G-G-C--G-G--C-A-T-G---C---C-T--AA-C--AC-A-T-G-C--A-A-G--T-C--GA-A-CG-A---------G-A-----------------------------------------------C-C--------------------TTC-G---------------------------G--G------------------------------------------TC--T-------AG-T-G-G-C-GC-A--C--G-GG--T--G-C-G-T-A-AC-G-C-G-T-G-GG---A-A-T-CT-C--T-C-GTT--CG-G----G-T---A-G-A---AT--A-C---C------------------G---C-…
>ICSZ4EG01B38BU
A-A-C--G-A-A-C-G-C--T-G-G-C--G-G--C-A-T-G---C---C-T--TA-C--AC-A-T-G-C--A-A-G--T-C--GA-A-CG-----------G-TA-----A--C---------------------------------A-G-G-T--------------------CTT-C---------------------------G--G--A-T-------------------------G-C-T----G--AC--G-------AG-T-G-G-C-GA-A--C--G-GG--T--G-A-G-T-A-AT-A-T-A-T-C-GG---A-A-C-GT-G--C-C-CAG--TA-G----T-G-G-G-G-G---AT-AA-C--TG------------------C-T-C-…
>ICSZ4EG01EG367
G-A-T--G-A-A-C-G-C--T-A-G-C--G-A--C-A-G-G---C---C-T--AA-C--AC-A-T-G-C--A-A-G--T-C--GA-G-GG-----------G-CAT--CGGG-GC------------------------------GAG-G-A-G-------------------CAAT-C---------------------------CT-T--G-C-C-----------------------G-C-C----G--GC--G-------AC-C-G-G-C-GC-A--C--G-GG--T--G-A-G-T-A-AC-G-C-G-T-A-TG---CGA-C-CT-G--C-C-CGT--TG-C----A-G-G-G-G-G---AT-AA-T--CG------------------G-G-A-…
>ICSZ4EG01EDYI7
A-T-T--G-A-A-C-G-C--T-G-G-C--G-G--C-A-T-G---C---C-T--TA-C--AC-A-T-G-C--A-A-G--T-C--GA-A-CG-----------G-CAG--C-A--T----------------------------GA-T-C-T-A-G--------------------CTT-G---------------------------C--T--A-G-A-T--T------------------G-A-T----G--GC--G-------AG-T-G-G-C-GA-A--C--G-GG--T--G-A-G-T-A-AT-A-C-A-T-C-GG---A-A-C-GT-G--C-C-CAG--TA-G----T-G-G-G-G-G---AT-AA-C--TG------------------C-T-C-…
>ICSZ4EG01ECO2I
A-A-C--G-A-A-C-G-C--T-G-G-C--G-G--C-A-T-G---C---C-T--AA-C--AC-A-T-G-C--A-A-G--T-C--GA-A-CG-A---------G-A-----------------------------------------------C-C--------------------TTC-G---------------------------A--G------------------------------------------TC--T-------AG-T-G-G-C-AC-A--C--A-GG--T--G-C-G-T-A-AC-G-C-G-T-G-GG---A-A-T-CT-G--C-C-CTT--GG-G----T-T-C-G-G-A---AT-AA-C--TC------------------G-C-C-…
>ICSZ4EG01EAZ2H
A-A-C--G-A-A-C-G-C--T-G-G-C--G-G--C-A-T-G---C---C-T--TA-C--AC-A-T-G-C--A-A-G--T-C--GA-A-CG-----------G-TA-----A--C---------------------------------G-G-G----------------------TCC-T---------------------------T--C--G-G-------------------------G-A-T----GCCGAC-G-------AG-T-G-G-C-GA-A--C--G-GG--T--G-A-G-T-A-AT-A-T-A-T-C-GG---A-A-C-GT-G--C-C-CAG--TA-G----T-G-G-G-G-G---AT-AA-C--TG------------------C-T-C-…
>ICSZ4EG01EAQPJ
G-A-C--G-A-A-C-G-C--T-G-G-T--G-G--C-G-T-G---C---T-T--AA-C--AC-A-T-G-C--A-A-G--T-C--GA-A-CG-----------G-AA---A-G--G-----------------------------C-C-C---T-G--------------------CTT-G---------------------------C--A----G-G-G-----------------------T-A----C--TC--G-------AG-T-G-G-C-GA-A--C--G-GG--T--G-A-G-T-A-AC-A-C-G-T-G-GG---TGA-T-CT-G--C-C-CTG--CA-C----T-T-C-G-G-G---AT-AA-G--CC------------------T-G-G-…
>ICSZ4EG01DZ4L8
A-A-C--G-A-A-C-G-C--T-G-G-C--G-G--C-A-T-G---C---C-T--AA-C--AC-A-T-G-C--A-A-G--T-C--GA-A-CG-A---------G-A-----------------------------------------------C-C--------------------TTC-G---------------------------G--G------------------------------------------TC--T-------AG-T-G-G-C-GC-A--C--G-GG--T--G-C-G-T-A-AC-G-C-G-T-G-GG---A-A-T-CT-G--C-C-CTT--GG-G----T-T-C-G-G-A---AT-AA-C--TC------------------G-C-C-…
>ICSZ4EG01DYRWG
G-A-C--G-A-A-C-G-C--T-G-G-C--G-G--C-G-T-G---C---T-T--AA-C--AC-A-T-G-C--A-A-G--T-C--GA-A-CG-----------G-AA---A-G--G-----------------------------C-C-A-G-T-G--------------------CTT-G---------------------------C--A--C-T-G-G-----------------------T-A----C--TC--G-------AG-T-G-G-C-GA-A--C--G-GG--T--G-A-G-T-A-AC-A-C-G-T-G-GG---TGA-T-CT-G--C-C-TTG--TA-C----T-C-T-G-G-G---AT-AA-G--CT------------------T-G-G-…
>ICSZ4EG02FSLHO
A-A-C--G-A-A-C-G-C--T-G-G-C--G-G--C-A-T-G---C---C-T--TA-C--AC-A-T-G-C--A-A-G--T-C--GA-A-CG-----------G-CAG--C-A--T---------------------------------GATCT-A--------------------GC--T---------------------------T--G--C-TA----------------------GATTGAT----G--GC--G-------AG-T-G-G-C-GA-A--C--G-GG--T--G-A-G-T-A-AT-A-T-A-T-C-GG---A-A-C-GT-G--C-C-CAG--TA-G----T-G-G-G-G-G---AT-AA-C--TG------------------C-T-C-…
>ICSZ4EG01DTJY1
A-A-C--G-A-A-C-G-C--T-G-G-C--G-G--C-A-T-G---C---C-T--AA-C--AC-A-T-G-C--A-A-G--T-C--GA-A-CG-----------G-TAA--C-G--------------------------------------G-G-T--------------------CCT-T---------------------------CGGGA-T---------------------------G-C-C----G--AC--G-------AG-T-G-G-C-GA-A--C--G-GG--T--G-A-G-T-A-AT-A-T-A-T-C-GG---A-A-C-GT-G--C-C-CAG--TA-G----T-G-G-G-G-G---AT-AA-C--TG------------------C-T-C-…
>ICSZ4EG01DSP30
A-A-C--G-A-A-C-G-C--T-G-G-C--G-G--C-A-T-G---C---C-T--AA-C--AC-A-T-G-C--A-A-G--T-C--GA-A-CG-----------G-AA---A-G--G-----------------------------C-T-C-C-T-G--------------------CTT-G---------------------------C--A--G-G-G-G-----------------------T-A----C--TC--G-------AG-T-G-G-C-GA-A--C--G-GG--T--G-A-G-T-A-AC-A-C-G-T-G-GG---TGA-T-CT-G--C-C-TTG--TA-C----T-C-T-G-G-G---AT-AA-G--CT------------------T-G-G-…
>ICSZ4EG01ATB7F
A-A-C--G-A-A-C-G-C--T-G-G-C--G-G--C-A-T-G---C---C-T--TA-C--AC-A-T-G-C--A-A-G--T-C--GA-A-CG-----------G-TAA--C-A-------------------------------G----G-T------------------------CTT-----------------------------C-----G-G-A----T------------------G-C-T----G--AC--G-------AG-T-G-G-C-GA-A--C--G-GG--T--G-A-G-T-A-AT-A-C-A-T-C-GG---A-A-C-GT-G--C-C-CTG--TA-G----T-G-G-G-G-G---AT-AA-C--TA------------------G-T-C-…
>ICSZ4EG01DM7YZ
A-A-C--G-A-A-C-G-C--T-G-G-C--G-G--C-A-T-G---C---C-T--AA-C--AC-A-T-G-C--A-A-G--T-C--GA-A-CG-A---------G-A-----------------------------------------------C-C--------------------TTC-G---------------------------G--G------------------------------------------TCG-T-------AG-T-G-G-C-GC-A--C--G-GG--T--G-C-G-T-A-AC-G-C-G-T-A-GG---A-A-T-CT-G--C-C-CTT--GG-G----T-T-CGG-G-A---AT-AA-C--TC------------------G-C-C-…
>ICSZ4EG01DM1DC
G-A-C--G-A-A-C-G-C--T-G-G-C--G-G--C-G-T-G---C---T-T--AA-C--AC-A-T-G-C--A-A-G--T-C--GA-A-CG-----------G-AA---A-G--G-----------------------------C---C-C-T-G--------------------CTT-G---------------------------C--A--G---G-G-----------------------T-A----C--TC--G-------AG-T-G-G-C-GA-A--C--G-GG--T--G-A-G-T-A-AC-A-C-G-T-G-GG---TGA-T-CT-G--C-C-CTG--CA-C----T-T-C-G-G-G---AT-AA-G--CC------------------T-G-G-…
>ICSZ4EG01DJXRW
A-A-C--G-A-A-C-G-C--T-G-G-C--G-G--C-A-T-G---C---C-T--AA-C--AC-A-T-G-C--A-A-G--C-C--GA-A-CG-A---------G-A-----------------------------------------------C-C--------------------TTC-G---------------------------G--G------------------------------------------TC--T-------AG-T-G-G-C-GC-A--C--G-GG--T--G-C-G-T-A-AC-G-C-G-T-G-GG---A-G-T-CT-G--C-C-CTT--GG-G----T-T-C-G-G-A---AT-AA-C--TT------------------G-C-C-…
>ICSZ4EG01DGL7G
A-A-C--G-A-A-C-G-C--T-G-G-C--G-G--C-A-T-G---C---C-T--AA-C--AC-A-T-G-C--A-A-G--T-C--GA-A-CG-A---------G-A-----------------------------------------------C-C--------------------TTC-G---------------------------G--G------------------------------------------TC--T-------AG-T-G-G-C-AC-A--C--G-GG--T--G-C-G-T-A-AC-G-C-G-T-G-GG---A-A-T-CT-G--C-C-CTT--GG-G----T-T-C-G-G-A---AT-AA-C--TC------------------G-C-C-…
>ICSZ4EG01DB7LV
A-T-T--G-A-A-C-G-C--T-G-G-C--G-G--C-A-T-G---C---C-T--TA-C--AC-A-T-G-C--A-A-G--T-C--GA-A-CG-----------G-TAA--C-A--G-----------------------------------G-T-C--------------------TTC-G---------------------------G--A--T---------------------------G-C-T----G--AC--G-------AG-T-G-G-C-GA-A--C--G-GG--T--G-A-G-T-A-AT-A-C-A-T-C-GG---A-A-C-GT-G--C-C-CAG--AC-G----T-G-G-G-G-G---AT-AA-C--GA------------------G-G-C-…
>ICSZ4EG01DA0NQ
A-A-C--G-A-A-C-G-C--T-G-G-C--G-G--C-A-T-G---T---C-T--AA-C--AC-A-T-G-C--A-A-G--T-C--GA-A-CG-A---------G-A-----------------------------------------------C-C--------------------TTC-G---------------------------G--G------------------------------------------TC--T-------AG-T-G-G-C-GC-A--C--G-GG--T--G-C-G-T-A-AC-G-C-G-T-G-GG---A-A-T-CT-G--C-C-CTT--GG-G----T-T-C-G-G-A---AT-AA-C--TC------------------G-C-C-…
>ICSZ4EG01D815Z
A-A-C--G-A-A-C-G-C--T-G-G-C--G-G--C-A-T-G---C---C-T--AA-C--AC-A-T-G-C--A-A-G--T-C--GA-A-CG-----------G-TA-----A--C---------------------------------G-G-G----------------------TCC-T---------------------------T--C--G-G-------------------------G-A-T----GCCGAC-G-------AG-T-G-G-C-GA-A--C--G-GG--T--G-A-G-T-A-AT-A-T-A-T-C-GG---A-A-C-GT-G--C-C-CAG--TA-G----T-G-G-G-G-G---AT-AA-C--TG------------------C-T-C-…
>ICSZ4EG01D6K1B
A-A-C--G-A-A-C-G-C--T-G-G-C--G-G--C-A-T-G---C---C-T--TA-C--AC-A-T-G-C--A-A-G--T-C--GA-A-CG-----------G-TAA--C----G----------------------------GG-T-C--------------------------CTT-----------------------------C--G--G-G-A----T------------------G-C-C----G--AC--G-------AG-T-G-G-C-GA-A--C--G-GG--T--G-A-G-T-A-AT-A-T-A-T-C-GG---A-A-C-GT-G--C-C-CAG--TA-G----T-G-G-G-G-G---AT-AA-C--TG------------------C-T-C-…
>ICSZ4EG01D64PA
A-A-C--G-A-A-C-G-C--T-G-G-C--G-G--C-G-T-G---C---T-T--AA-C--AC-A-T-G-C--A-A-G--T-C--GA-A-CG-----------G-AA---A-G--G-----------------------------C-T-C-C-T-G--------------------CTT-G---------------------------C--AG-G---G-G-----------------------T-A----C--TC--G-------AG-T-G-G-C-GA-A--C--G-GG--T--G-A-G-T-A-AC-A-C-G-T-G-GG---TGA-T-CT-G--C-C-CTG--CA-C----T-T-C-G-G-G---AT-AA-G--CC------------------T-G-G-…
>ICSZ4EG01D4L08
A-A-C--G-A-A-C-G-C--T-G-G-C--G-G--C-A-T-G---C---C-T--TA-C--AC-A-T-G-C--A-A-G--T-C--GA-A-CG-----------G-TAA--C----G----------------------------GG-T-C--------------------------CTT-----------------------------C--G--G-G-A-T--G------------------C---C----G--AC--G-------AG-T-G-G-C-GA-A--C--G-GG--T--G-A-G-T-A-AT-A-T-A-T-C-GG---A-A-C-GT-G--C-C-CAG--TA-G----T-G-G-G-G-G---AT-AA-C--TG------------------C-T-C-…
>ICSZ4EG01D3AJ1
A-T-T--G-A-A-C-G-C--T-G-G-C--G-G--C-A-T-G---C---C-T--TA-C--AC-A-T-G-C--A-A-G--T-C--GA-A-CG-----------G-TAA--C-A--G-----------------------------------G-T-C--------------------TTC-G---------------------------G--A--T---------------------------G-C-T----G--AC--G-------AG-T-G-G-C-GA-A--C--G-GG--T--G-A-G-T-A-AT-A-C-A-T-C-GG---A-A-C-GT-G--C-C-CAG--AC-G----T-G-G-G-G-G---AT-AA-C--GA------------------G-G-C-…
>ICSZ4EG02F2AWM
A-T-T--G-A-A-C-G-C--T-G-G-C--G-G--C-A-T-G---C---C-T--TA-C--AC-A-T-G-C--A-A-G--T-C--GA-A-CG-----------G-CAG--C-AT-GAT---------------------------------C-TAGC------------------TTGCTA---------------------------G--AT-T---------------------------G-A-T----G--GC--G-------AG-T-G-G-C-GA-A--C--G-GG--T--G-A-G-T-A-AT-A-C-A-T-C-GG---A-A-C-GT-G--C-C-CGA--TC-G----T-G-G-G-G-G---AT-AA-C--GA------------------A-G-C-…
>ICSZ4EG01D0W25
A-A-C--G-A-A-C-G-C--T-G-G-C--G-G--C-A-T-G---C---C-T--AA-C--AC-A-T-G-C--A-A-G--T-C--GA-A-CG-A---------G-A-----------------------------------------------C-C--------------------TTC-G---------------------------G--G------------------------------------------TC--T-------AG-T-G-G-C-GC-A--C--G-GG--T--G-C-G-T-A-AC-G-C-G-T-G-GG---A-A-T-CT-G--C-C-CTT--GG-G----T-T-C-G-G-A---AT-AA-C--TC------------------G-C-C-…
>ICSZ4EG01D0O72
A-T-T--G-A-A-C-G-C--T-G-G-C--G-G--C-A-T-G---C---C-T--AA-C--AC-A-T-G-C--A-A-G--T-C--GA-A-CG-A---------G-A-----------------------------------------------C-C--------------------TTC-G---------------------------G--G------------------------------------------TC--T-------AG-T-G-G-C-GC-A--C--G-GG--T--G-C-G-T-A-AC-G-C-G-T-G-GG---A-A-T-CT-G--C-C-CTT--GG-G----T-T-C-G-G-A---GT-AA-C--TC------------------G-C-C-…
>ICSZ4EG01CYU65
A-A-C--G-A-A-C-G-C--T-G-G-C--G-G--C-A-T-G---C---C-T--AA-C--AC-A-T-G-C--A-A-G--T-C--GA-A-CG-A---------G-A-----------------------------------------------C-C--------------------TTC-G---------------------------G--G------------------------------------------TC--T-------AG-T-G-G-C-GC-A--C--G-GG--T--G-C-G-T-A-AC-G-C-G-T-G-GG---A-A-T-CT-G--C-C-CTT--GG-G----T-T-C-G-G-A---AT-AA-C--TC------------------G-C-C-…
>ICSZ4EG01CYEB0
A-A-C--G-A-A-C-G-C--T-G-G-C--G-G--C-A-T-G---C---C-T--AA-C--GC-A-T-G-C--A-A-G--T-C--GA-A-CG-A---------G-A-----------------------------------------------C-C--------------------TTC-G---------------------------G--G------------------------------------------TC--T-------AG-C-G-G-C-GC-A--C--G-GG--T--G-C-G-T-A-AC-G-C-G-T-G-GG---A-A-T-CT-G--C-C-CTT--GG-G----T-T-C-G-G-A---GT-AA-C--TC------------------G-C-C-…
>ICSZ4EG01CY2Z3
A-T-T--G-A-A-C-G-C--T-G-G-C--G-G--C-A-T-G---C---C-T--TA-C--AC-A-T-G-C--A-A-G--T-C--GA-A-CG-----------G-TAA--C-A--G-----------------------------------G-T-C--------------------TTC-G---------------------------G--A--T---------------------------G-C-T----G--AC--G-------AG-T-G-G-C-GA-A--C--G-GG--T--G-A-G-T-A-AT-A-C-A-T-C-GG---A-A-C-GT-G--C-C-CGA--TC-G----T-G-G-G-G-G---AT-AA-C--GA------------------A-G-C-…
>ICSZ4EG01CXN5I
A-A-C--G-A-A-C-G-C--T-G-G-C--G-G--C-A-T-G---C---C-T--TA-C--AC-A-T-G-C--A-A-G--T-C--GA-A-CG-----------G-TAA--C-A--G-----------------------------------G-T-C--------------------TTC-G---------------------------G--A--T---------------------------G-C-T----G--AC--G-------AG-T-G-G-C-GA-A--C--G-GG--T--G-A-G-T-A-AT-A-C-A-T-C-GG---A-A-C-GT-G--C-C-CGA--TC-G----T-G-G-G-G-G---AT-AA-C--GA------------------A-G-C-…
>ICSZ4EG01DKAZA
A-T-T--G-A-A-C-G-C--T-G-G-C--G-G--C-A-T-G---C---C-T--TA-C--AC-A-T-G-C--A-A-G--T-C--GA-A-CG-----------G-TAA--C-G--G-----------------------------------G-TCC--------------------TTCGG---------------------------G--A--T---------------------------G-C-C----G--AC--G-------AG-T-G-G-C-GA-A--C--G-GG--T--G-A-G-T-A-AT-A-T-A-T-C-GG---A-A-C-GT-G--C-C-CAG--TA-G----T-G-G-G-G-G---AT-AA-C--GA------------------A-G-C-…
>ICSZ4EG01CS0B7
A-A-C--G-A-A-C-G-C--T-G-G-C--G-G--C-A-T-G---C---T-T--AA-C--AC-A-T-G-C--A-A-G--T-C--GA-A-CG-A---------G-A-----------------------------------------------C-C--------------------TTC-G---------------------------G--G------------------------------------------TC--T-------AG-T-G-G-C-GC-G--C--G-GG--T--G-C-G-T-A-AC-G-C-G-T-G-GG---A-A-T-CT-G--C-C-CTT--GG-G----T-T-C-G-G-A---AT-AA-C--TC------------------G-C-C-…
>ICSZ4EG01CR8XE
A-G-T--G-A-A-C-G-C--T-G-G-C--G-G--T-A-G-G---C---C-T--AA-C--AC-A-T-G-C--A-A-G--T-C--GA-A-CG-----------G-CAG--C-A--C----------------A-----------G--G-A-G-A-G--------------------CTT-G---------------------------C--T--C-T-C----TG-----------------G-G-T----G--GC--G-------AG-T-G-G-C-GG-A--C--G-GG--T--G-A-G-G-A-AT-A-C-A-T-C-GG---A-A-T-CT-A--C-T-TTT--TC-G----T-G-G-G-G-G---AT-AA-C--GT------------------A-G-G-…
>ICSZ4EG01CPHD3
A-A-C--G-A-A-C-G-C--T-G-G-C--G-G--C-A-T-G---C---C-T--AA-C--AC-A-T-G-C--A-A-G--T-C--GA-A-CG-A---------G-A-----------------------------------------------C-C--------------------TTC-G---------------------------G--G------------------------------------------TC--T-------AG-T-G-G-C-GC-A--C--G-GG--T--G-C-G-T-A-AC-G-C-G-T-G-GG---A-A-T-CT-G--C-C-CTT--GG-G----T-T-C-G-G-A---AT-AA-C--TC------------------A-C-CG…
>ICSZ4EG01CP32D
A-G-C--G-A-A-C-G-C--T-G-G-C--G-G--C-A-G-G---C---T-T--AA-C--AC-A-T-G-C--A-A-G--T-C--GA-A-CG-G---------G-C-----------------------------------------------A-C--------------------TTC-G---------------------------G--T------------------------------------------GC--T-------AG-T-G-G-C-AG-A--C--G-GG--T--G-A-G-T-A-AC-A-C-G-T-G-GG---A-A-C-GT-A--C-C-TTT--CG-G----T-T-C-G-G-A---AT-AA-C--TC------------------G-C-C-…
>ICSZ4EG01CNA9D
G-A-C--G-A-A-C-G-C--T-G-G-C--G-G--C-G-T-G---C---C-T--AA-T--AC-A-T-G-C--A-A-G--T-C--GA-A-CG-C---------A-T----T-T--T-----------CTTT-C-----------AC-C-G-T-A-G--------------------CTT-G---------------------------C--T--A-C-A-C--CGA--AAG-------------A-A----A--AT--G-------AG-T-G-G-C-GA-A--C--G-GG--T--G-A-G-T-A-AC-A-C-G-T-G-GG---TAA-C-CT-G--C-C-CAT--CA-G----C-G-G-G-G-G---AT-AA-C--AC------------------T-T-G-…
>ICSZ4EG01CKG6W
G-A-T--G-A-A-C-G-C--T-A-G-C--G-A--C-A-G-G---C---T-T--AA-C--AC-A-T-G-C--A-A-G--T-C--GA-G-GG-----------G-CAG--C-G--G----------------G-----------GG-A-G-T-A----------------------GCA-A------------------------------T--A-C-T-C--CC-----------------G-C-C----G--GC--G-------AC-C-G-G-C-GC-A--C--G-GG--T--G-A-G-T-A-AC-A-C-G-T-A-TG---AAA-C-CT-G--C-C-CGT--AG-C----A-G-G-G-G-G---AT-AA-G--CG------------------G-A-A-…
>ICSZ4EG01C9XAT
A-T-T--G-A-A-C-G-C--T-G-G-C--G-G--C-A-T-G---C---C-T--TA-C--AC-A-T-G-C--A-A-G--T-C--GA-A-CG-----------G-TA-----A--C---------------------------------G-G-G----------------------TCC-T---------------------------T--C--G-G-------------------------G-A-T----GCCGAC-G-------AG-T-G-G-C-GA-A--C--G-GG--T--G-A-G-T-A-AT-A-T-A-T-C-GG---A-A-C-GT-G--C-C-CAG--TA-G----T-G-G-G-G-G--AGT-AA-C--TG------------------C-T-C-…
>ICSZ4EG01C9BQW
G-A-T--G-A-A-C-G-C--T-G-G-C--G-G--C-G-T-G---C---T-T--AA-C--AC-A-T-G-C--A-A-G--T-C--GA-A-CG-----------G-AA---A-G--G-----------------------------T-T-C-C-T-G--------------------CTT-G---------------------------CA-A--G-G-G-G-----------------------T-A----C--TC--G-------AG-T-G-G-C-GA-A--C--G-GG--T--G-A-G-T-A-AC-A-C-G-T-G-GG---TGA-T-CT-G--C-C-TTG--TA-C----T-C-T-G-G-G---AT-AA-G--CT------------------T-G-G-…
>ICSZ4EG01C7LVH
G-A-T--G-A-A-C-G-C--T-A-G-C--G-A--C-A-G-G---C---T-T--AA-C--AC-A-T-G-C--A-A-G--TCGAGGGGCAGCGGGGA-----GCAAG--------------------------------------------CTTGCT-----------------TGCTCTGC--------------------------C--G------------------------------------------GC--G-------AC-C-G-G-C-GC-A--C--G-GG--T--G-C-G-T-A-AC-G-C-G-T-G-GG---A-A-T-CT-G--C-C-CTT--GG-G----T-T-C-G-G-A---AT-AA-C--TC------------------G-C-C-…
>ICSZ4EG01C68YM
G-A-C--G-A-A-C-G-C--T-G-G-C--G-G--C-A-T-G---C---C-T--AA-C--AC-G-T-G-C--A-A-G--T-C--GA-A-CG-A---------G-A-----------------------------------------------C-C--------------------TTC-G---------------------------G--G------------------------------------------TC--T-------AG-T-G-G-C-GC-A--C--G-GG--T--G-C-G-T-A-AC-G-C-G-T-G-GG---A-A-T-CT-G--C-C-CTT--GG-G----T-T-C-G-G-A---AT-AA-C--TC------------------A-C-C-…
>ICSZ4EG01C5P9B
A-T-T--G-A-A-C-G-C--T-G-G-C--G-G--C-A-T-G---C---C-T--TA-C--AC-A-T-G-C--A-A-G--T-C--GA-ACGGAAAG-------GCTC----------------------------------------------CTGC------------------TTGCAGG--------------------------G--G-----------------------------------------TAC--TCG-----AG-T-G-G-C-GA-A--C--G-GG--T--G-A-G-T-A-AC-G-C-G-C-G-GG---A-A-T-CT-G--C-C-CTT--GG-G----T-T-C-G-G-A---AT-AA-C--TC------------------G-C-C-…
>ICSZ4EG01C3P25
A-A-C--G-A-A-C-G-C--T-G-G-C--G-G--C-A-T-G---C---C-T--AA-C--AC-A-T-G-C--A-A-G--C-C--GA-A-TG-A---------G-A-----------------------------------------------C-C--------------------TTC-G---------------------------G--G------------------------------------------TC--T-------AG-T-G-G-C-GC-A--C--G-GG--T--G-C-G-T-A-AC-G-C-G-T-G-GG---A-A-T-CT-G--C-C-CTT--GG-G----T-T-C-G-G-A---AT-AA-C--TC------------------G-C-C-…
>ICSZ4EG01BXHB1
G-A-T--G-A-A-C-G-C--T-G-G-C--G-G--C-G-T-G---C---T-T--AA-C--AC-A-T-G-C--A-A-G--T-C--GA-A-CG-----------G-AA---A-G--G-----------------------------C-C-T-C-T-G--------------------CTT-G---------------------------C--AG-G---G-G-----------------------T-A----C--TC--G-------AG-T-G-G-C-GA-A--C--G-GG--T--G-A-G-T-A-AC-A-C-G-T-G-GG---TGA-T-CT-G--C-C-CTG--CA-C----T-T-C-G-G-G---AT-AA-G--CC------------------T-G-G-…
>ICSZ4EG01BVQY1
G-A-C--G-A-A-C-G-C--T-G-G-C--G-G--C-G-T-G---C---T-T--AA-C--AC-A-T-G-C--A-A-G--T-C--GA-A-CG-----------G-AA---A-G--G-----------------------------C---C-C-T-G--------------------CTT-G---------------------------C--A--G---G-G-----------------------T-A----C--TC--G-------AG-T-G-G-C-GA-A--C--G-GG--T--G-A-G-T-A-AC-A-C-G-T-G-GG---TGA-T-CT-G--C-C-CTG--CA-C----T-T-C-G-G-G---AT-AA-G--CC------------------T-G-G-…
>ICSZ4EG01BVHMV
A-A-C--G-A-A-C-G-C--T-G-G-C--G-G--C-A-T-G---C---C-T--AA-C--AC-A-T-G-C--A-A-G--T-C--GA-A-CG-A---------G-A-----------------------------------------------C-C--------------------TTC-G---------------------------G--G------------------------------------------TC--T-------AG-T-G-G-C-G-----C--G-GG--G--A-C-G-----AC-G---G---G-AG---G-A-T-C--G--C-C-CTT--GG-G----T-T-C-G-G-A---AT-AA-C--TC------------------G-C-C-…
>ICSZ4EG01BTR5B
A-G-C--G-A-A-C-G-C--T-G-G-C--G-G--C-A-G-G---C---T-T--AA-C--AC-A-T-G-C--A-A-G--T-C--GA-A-CG-G---------G-C---------------------------------------------A---C--------------------TTC-G---------------------------G-----T---------------------------------------GC--T-------AG-T-G-G-C-AG-A--C--G-GG--T--G-A-G-T-A-AC-A-C-G-T-G-GG---A-A-C-GT-A--C-C-TTT--CG-G----T-T-C-G-G-A---AT-AA-T--TC------------------A-G-G-…
>ICSZ4EG01BT346
A-A-C--G-A-A-C-G-C--T-G-G-C--G-G--C-A-T-G---C---C-T--AA-C--AC-A-T-G-C--A-A-G--T-C--GA-A-CG-----------G-CAG--C-A--T----------------------------GA-T-C-T-A-G--------------------CTT-G---------------------------C--T--A-G-A-T--T------------------G-A-T----G--AC--G-------AG-T-G-G-C-GA-A--C--G-GG--T--G-A-G-T-A-AT-A-T-A-T-C-GG---A-A-C-GT-G--C-C-CAG--TA-G----T-G-G-G-G-G---AT-AA-C--TG------------------C-T-C-…
>ICSZ4EG01BSICQ
A-A-C--G-A-A-C-G-C--T-G-G-C--G-G--C-A-T-G---C---T-T--TA-C--AC-A-T-G-C--A-A-G--T-C--GA-A-CG-----------G-TAA--C-A--G---------------------------------G-G-T-G--------------------CTT-G---------------------------C--A--C-C-------------------------G-C-T----G--AC--G-------AG-T-G-G-C-GA-A--C--G-GG--T--G-A-G-T-A-AT-G-C-A-T-C-GG---A-A-C-GT-A--C-C-CAG--TC-G----T-G-G-G-G-G---AT-AA-C--GT------------------A-G-C-…
>ICSZ4EG01BQZVN
A-A-C--G-A-G-C-G-C--T-G-G-C--G-G--C-A-T-G---C---C-T--AG-C--AC-A-T-G-C--A-A-G--T-C--GA-A-CG-A---------G-A-----------------------------------------------C-C--------------------TTC-G---------------------------G--G------------------------------------------TC--T-------GG-T-G-G-C-GC-A--C--G-GG--T--G-C-G-T-A-AC-G-C-G-T-G-GG---A-A-T-CT-G--C-C-CTT--GG-G----T-T-C-G-G-A---AT-AA-C--TC------------------G-C-C-…
>ICSZ4EG01BKLKU
A-A-C--G-A-A-C-G-C--T-G-G-C--G-G--C-A-T-G---C---C-T--AG-C--AC-A-T-G-C--A-A-G--T-C--GA-A-CG-A---------G-A-----------------------------------------------C-C--------------------TTC-G---------------------------G--G------------------------------------------TC--T-------AG-T-G-G-C-GC-A--C--G-GG--T--G-C-G-T-A-AC-G-C-G-T-G-GG---A-A-T-CT-A--C-C-CTT--GG-G----T-T-C-G-G-A---AT-AA-C--TC------------------G-C-C-…
>ICSZ4EG01BGMJG
A-T-T--G-A-A-C-G-C--T-G-G-C--G-G--C-A-T-G---C---C-T--TA-C--AC-A-T-G-C--A-A-G--T-C--GA-A-CG-----------G--TG----A--C---------------------------------G-G-G----------------------TCC-T---------------------------T--C--G-G-------------------------G-A-T----GCCGAC-G-------AG-T-G-G-C-GA-A--C--G-GG--T--G-A-G-T-A-AT-A-T-A-T-C-GG---A-A-C-GT-G--C-C-CAG--TA-G----T-G-G-G-G-G---AT-AA-C--TG------------------C-T-C-…
>ICSZ4EG01BGDL0
T---T--G-A-A-C-G-C--T-G-G-C--G-G--C-A-T-G---C---C-T--TA-C--AC-A-T-G-C--A-A-G--T-C--GA-A-CG-----------G-TAA--C-G--G-----------------------------------G-TCC--------------------TTCGG---------------------------G--A--T---------------------------G-C-C----G--AC--G-------AG-T-G-G-C-GA-A--C--G-GG--T--G-A-G-T-A-AT-A-T-A-T-C-GG---A-A-C-GT-G--C-C-CGA--TC-G----T-G-G-G-G-G---AT-AA-C--GA------------------G-G-C-…
>ICSZ4EG01BFRBA
A-T-T--G-A-A-C-G-C--T-G-G-C--G-G--C-A-T-G---C---C-T--TA-C--AC-A-T-G-C--A-A-G--T-C--GA-A-CG-----------G-TAA--C-A--G-----------------------------------G-T-C--------------------TTC-G---------------------------G--A--T---------------------------G-C-T----G--AC--G-------AG-T-G-G-C-GA-A--C--G-GG--T--G-A-G-T-A-AT-A-C-A-T-C-GG---A-A-C-GT-G--C-C-CGA--TC-G----T-G-G-G-G-G---AT-AA-C--GA------------------A-G-C-…
>ICSZ4EG01BFE1Y
A---T--G-A-A-C-G-C--T-G-G-C--G-G--C-A-T-G---C---C-T--TA-C--AC-A-T-G-C--A-A-G--T-C--GA-A-CG-----------G-TAG--C-A--T----------------------------GA-T-C-T-A-G--------------------CTT-G---------------------------C--T--A-G-A-T--T------------------G-A-T----G--GC--G-------AG-T-G-G-C-GA-A--C--G-GG--T--G-G-G-T-A-AT-A-C-A-T-C-GG---A-A-C-GT-G--C-C-CTG--TA-G----T-G-G-G-G-G---AT-AA-C--TA------------------G-T-C-…
>ICSZ4EG01BB7S4
A-A-C--G-A-A-C-G-C--T-G-G-C--G-G--C-A-T-G---C---C-T--AA-C--AC-A-T-G-C--A-A-G--T-C--GA-A-CG-A---------G-A-----------------------------------------------C-C--------------------TTC-G---------------------------G--G------------------------------------------TC--T-------AG-T-G-G-C-GC-A--C--G-GG--T--G-C-G-T-A-AC-G-C-G-T-G-GG---A-A-T-CT-G--C-C-TTT--GG-G----T-C-C-G-G-A---AT-AA-C--TC------------------G-C-C-…
>ICSZ4EG01B8LQE
A-A-C--G-A-A-C-G-C--T-G-G-C--G-G--C-A-T-G---C---C-T--AA-C--AC-A-T-G-C--A-A-G--T-C--GA-A-CG-----------G-AA---A-G--G-----------------------------C-T-C-C-T-G--------------------CTT-G---------------------------C--AG-G---G-G-----------------------T-A----C--TC--G-------AG-T-G-G-C-GA-A--C--G-GG--T--G-A-G-T-A-AC-A-C-G-T-G-GG---TGA-T-CT-G--C-C-CTG--CA-C----T-T-C-G-G-G---AT-AA-G--CC------------------T-G-G-…
>ICSZ4EG01B7S3Q
A-A-C--G-A-A-C-G-C--T-G-G-C--G-G--C-A-C-G---C---C-T--TA-C--AC-A-T-G-C--A-A-G--T-C--GA-A-CG-----------G-TAA--C-A--G-----------------------------------G-T-C--------------------TTC-G---------------------------G--A--T---------------------------G-C-T----G--AC--G-------AG-T-G-G-C-GA-A--C--G-GG--T--G-A-G-T-A-AT-A-C-A-T-C-GG---A-A-C-GT-G--C-CCAGA---C-G----T-G-G-G-G-G---AT-AA-C--GA------------------G-G-C-…
>ICSZ4EG01B6KSG
A-A-C--G-A-A-C-G-C--T-G-G-C--G-G--C-A-T-G---C---C-T--TA-C--AC-A-T-G-C--A-A-G--T-C--GA-A-CG-----------G-CAG--C-A--T----------------------------GA-T-C-T-A-G--------------------CTT-G---------------------------C--T--A-G-A-T--T------------------G-A-T----G--GC--G-------AG-C-G-G-C-GA-A--C--G-GG--T--G-A-G-T-A-AT-A-C-A-C-C-GG---A-A-C-GT-G--C-C-CTG--TA-G----T-G-G-G-G-G---AT-AA-C--TA------------------G-T-C-…
>ICSZ4EG01B52LZ
A-A-C--G-A-A-C-G-C--T-G-G-C--G-G--C-A-T-G---C---C-T--AA-C--AC-A-T-G-C--A-A-G--T-C--GA-A-CG-----------G-TAA--C-A--G-----------------------------------G-T-C--------------------TTC-G---------------------------G--A--T---------------------------G-C-T----G--AC--G-------AG-T-G-G-C-GA-A--C--G-GG--T--G-A-G-T-A-AT-A-C-A-T-C-GG---A-A-C-GT-G--C-C-CGA--TC-G----T-G-G-G-G-G---AT-AA-C--GA------------------G-G-C-…
>ICSZ4EG01B4877
A-A-C--G-A-A-C-G-C--T-G-G-C--G-G--C-A-T-G---C---C-T--AA-C--AC-A-T-G-C--A-A-G--T-C--GA-A-CG-----------G-TA-----A--C---------------------------------G-G-G----------------------TCC-T---------------------------T--C--G-G-------------------------G-A-T----GCCGAC-G-------AG-T-G-G-C-GA-A--C--G-GG--T--G-A-G-T-A-AT-A-C-A-T-C-GG---A-A-C-GT-G--C-C-CGA--TC-G----T-G-G-G-G-G---AT-AA-C--GA------------------A-G-C-…
>ICSZ4EG01B1MNW
A-A-C--G-A-A-C-G-C--T-G-G-C--G-G--C-A-T-G---C---C-T--AA-C--AC-A-T-G-C--A-A-G--T-C--GA-A-CG-----------G-AA---A-G--G-----------------------------C-T-C-C-T-G--------------------CTT-G---------------------------C--AG-G---G-G-----------------------T-A----C--TC--G-------AG-T-G-G-C-GA-A--C--G-GG--T--G-A-G-T-A-AC-A-C-G-T-G-GG---TGA-T-CT-G--C-C-CTG--CA-C----T-T-C-G-G-G---AT-AA-G--CC------------------T-G-G-…
>ICSZ4EG01AXGT4
A-A-C--G-A-A-C-G-C--T-G-G-C--G-G--C-A-T-G---C---C-T--AA-C--AC-A-T-G-C--A-A-G--T-C--GA-A-CG-A---------G-A-----------------------------------------------C-C--------------------TTC-G---------------------------G--G------------------------------------------TC--T-------AG-T-G-G-C-GC-A--C--G-GG--T--G-T-G-T-A-GC-G-C-G-T-G-GG---A-A-T-CT-G--C-C-CTT--GG-G----T-T-C-G-G-A---AT-AA-C--TC------------------G-C-C-…
>ICSZ4EG01AS257
A-A-C--G-A-A-C-A-C--T-G-G-C--G-G--C-A-T-G---C---C-T--AA-C--AC-G-C-G-C--A-A-G--T-C--GA-A-CG-A---------G-A-----------------------------------------------C-C--------------------TTC-G---------------------------G--G------------------------------------------TC--T-------AG-T-G-G-C-GC-A--C--G-GG--T--G-C-G-T-A-AC-G-C-G-T-G-GG---A-A-T-CT-G--C-C-CTT--GG-G----T-T-C-G-G-A---AT-AA-C--TC------------------G-C-C-…
>ICSZ4EG01A9I3R
A-A-C--G-A-A-C-G-C--T-G-G-C--G-G--C-A-T-G---C---C-T--AA-C--AC-A-T-G-C--A-A-G--T-C--GA-A-CG-A---------G-A-----------------------------------------------C-C--------------------TTC-G---------------------------G--G------------------------------------------TC--T-------AG-T-G-G-C-GC-A--C--G-GG--T--G-C-G-T-A-AC-G-C-G-T-G-GG---A-A-T-CT-G--C-C-CTT--GG-G----T-T-C-G-G-A---AT-AA-C--TC------------------G-C-C-…
>ICSZ4EG01A9CVC
A-A-C--G-A-A-C-G-C--T-G-G-C--G-G--C-A-T-G---C---C-T--TA-C--AC-A-T-G-C--A-A-G--T-C--GA-A-CG-----------G-TAA--C----G----------------------------GG-T-C--------------------------CTT-----------------------------C--G--G-G-A----T------------------G-C-C----G--AC--G-------AG-T-G-G-C-GA-A--C--G-GG--T--G-A-G-T-A-AT-A-T-A-T-C-GG---A-A-C-GT-G--C-C-CTG--TA-A----T-G-G-G-G-G---AT-AA-C--TA------------------G-T-C-…
>ICSZ4EG01A8P0O
A-A-C--G-A-A-C-G-C--T-G-G-C--G-G--C-A-C-G---C---C-T--AA-C--AC-A-T-G-C--A-A-G--T-C--GA-A-CG-A---------G-A-----------------------------------------------C-C--------------------TTC-G---------------------------G--G------------------------------------------TC--T-------AG-T-G-G-C-GC-A--T--G-GG--T--G-C-G-T-A-AC-G-C-G-T-G-GG---A-A-T-CT-G--C-C-CTT--GG-G----T-T-C-G-G-A---AT-AA-C--TC------------------G-C-C-…
>ICSZ4EG01A79HQ
A-T-T--G-A-A-C-G-C--T-G-G-C--G-G--C-A-T-G---C---C-T--TA-C--AC-A-T-G-C--A-A-G--T-C--G--A--G-C---------G-C-----------------------------------------------C-C--------------------CGC-A---------------------------A--G------------------------------------------GG--G-------AG-C-G-G-C-AG-A--C--G-GG--T--G-A-G-T-A-AC-G-C-G-T-G-GG---A-A-T-CT-G--C-C-CTT--GG-G----T-T-C-G-G-A---AT-AA-C--TC------------------G-C-C-…
>ICSZ4EG01A4HKZ
A-T-T--G-A-A-C-G-C--T-G-G-C--G-G--C-A-T-G---C---C-T--TA-C--AC-A-T-G-C--A-A-G--T-C--GA-A-CG-----------G-TAA--C-A-------------------------------G----G-T------------------------CTT-----------------------------C-----G-G-A----T------------------G-C-T----G--AC--G-------AG-T-G-G-C-GA-A--C--G-GG--T--G-A-G-T-A-AT-A-C-A-T-C-GG---A-A-C-AT-G--C-C-CTG--TA-G----T-G-G-G-G-G---AT-AA-C--TA------------------G-T-C-…
>ICSZ4EG01A4IYA
A-A-C--G-A-A-C-G-C--T-G-G-C--G-G--C-A-T-G---C---C-T--TA-C--AC-A-T-G-C--A-A-G--T-C--GA-A-CG-----------G-TAA--C----------------------------------G-G-G---T-C--------------------CTT-----------------------------C------GG-G-A--T------------------G-C-C----G--AC--G-------AG-T-G-G-C-GA-A--C--G-GG--T--G-A-G-T-A-AT-A-C-A-T-C-GG---A-A-C-GT-G--C-C-CTG--TA-G----T-G-G-G-G-G---AT-AA-C--TA------------------G-T-C-…
>ICSZ4EG01A3BXW
A-T-T--G-A-A-C-G-C--T-G-G-C--G-G--C-A-T-G---C---C-T--TA-C--AC-A-T-G-C--A-A-G--T-C--GA-A-CG-----------G-CAG--C-A--T----------------------------GA-T-C-T-A-G--------------------CTT-G---------------------------C--T--A-G-A-T--C------------------G-A-T----G--GC--G-------AG-T-G-G-C-GA-A--C--G-GG--T--G-A-G-T-A-AT-A-C-A-T-C-GG---A-A-C-GT-G--C-C-CTG--TA-G----T-G-G-G-G-G---AT-AA-C--TA------------------G-T-C-…
>ICSZ4EG01A18BL
A-A-C--G-A-A-C-G-C--C-G-G-C--G-G--C-A-T-G---C---C-T--AA-C--AC-A-T-G-C--A-A-G--T-C--GA-A-CG-A---------G-A-----------------------------------------------C-C--------------------TTC-G---------------------------G--G------------------------------------------TC--T-------AG-T-G-G-C-GC-A--C--G-GG--T--G-C-G-T-A-AC-G-C-G-T-G-GG---A-A-T-CT-G--C-C-CTT--GG-G----T-T-C-G-G-A---AT-AA-C--TC------------------G-C-C-…
>ICSZ4EG01EDEM9
G-A-T--G-A-A-C-G-C--T-A-G-C--G-G--G-A-G-G---C---C-T--AA-C--AC-A-T-G-C--A-A-G--C-C--GA-G-CG-G---------T-A----T-T--G---------------------------------T-T-T-C--------------------TTC-G---------------------------G--A--A-A---------------------------T-G----A--GA--G-------AG-C-G-G-C-GT-A--C--G-GG--T--G-C-G-G-A-AC-A-C-G-T-G-TG---CAA-C-CT-G--C-C-TTT--AT-C----T-G-G-G-G-G---AT-AG-C--CT------------------T-T-C-…
>ICSZ4EG01DCG1I
A-A-C--G-A-A-C-G-C--T-G-G-C--G-G--C-A-T-G---C---C-T--AA-C--AC-A-T-G-C--A-A-G--T-C--GA-A-CG-A---------G-A-----------------------------------------------T-C--------------------TTC-G---------------------------G--A------------------------------------------TC--T-------AG-T-G-G-C-GC-A--C--G-GG--T--G-C-G-T-A-AC-G-C-G-T-G-GG---A-A-T-CT-G--C-C-TTG--GG-G----T-T-C-G-G-A---AT-AA-C--TC------------------C-C-C-…
>ICSZ4EG01CJ1VC
A-A-C--G-A-A-C-G-C--T-G-G-C--G-G--C-A-T-G---C---C-T--AA-C--AC-A-T-G-C--A-A-G--T-C--GA-A-CG-A---------G-A-----------------------------------------------C-C--------------------TTC-G---------------------------G--G------------------------------------------TC--T-------AG-T-G-G-C-GC-A--C--G-GG--T--G-C-G-T-A-AC-G-C-G-T-G-GG---A-A-T-CT-G--C-C-CTT--GG-G----T-T-C-G-G-A---AT-AA-C--AG------------------T-G-A-…
>ICSZ4EG01CIVRE
A-G-C--G-A-A-C-G-C--T-G-G-C--G-G--C-A-G-G---C---T-T--AA-C--AC-A-T-G-C--A-A-G--T-C--GA-G-CG-G---------G-C---------------------------------------------A-T-A--------------------GCA-A---------------------------T--A--T---------------------------------------GT--C-------AG-C-G-G-C-AG-A--C--G-GG--T--G-A-G-T-A-AC-G-C-G-T-G-GG---A-A-C-GT-A--C-C-TTT--TG-G----T-T-C-G-G-A---AC-AA-C--TG------------------A-G-G-…
>ICSZ4EG01D3E2D
G-A-T--G-A-A-C-G-C--T-A-G-C--G-A--C-A-G-G---C---T-T--AA-C--AC-A-T-G-C--A-A-G--T-C--GA-G-GG-----------G-CAG--C-G--G----------------G-----------GG-A-G-T-A----------------------GCA-A------------------------------T--A-C-T-C--CC-----------------G-C-C----G--GC--G-------AC-C-G-G-C-GC-A--C--G-GG--T--G-A-G-T-A-AC-A-C-G-T-A-TG---AAA-C-CT-G--C-C-CGT--AG-C----A-G-G-G-G-G---AT-AA-G--CG------------------G-A-A-…
>ICSZ4EG01EH2LI
A-T-T--G-A-A-C-G-C--T-G-G-C--G-G--C-A-T-G---C---C-T--TA-C--AC-A-T-G-C--A-A-G--T-C--GA-A-CG-----------G-TAA--C-A--G-----------------------------------G-T-C--------------------TTC-G---------------------------G--A--T---------------------------G-C-T----G--AC--G-------AG-T-G-G-C-GA-A--C--G-GG--T--G-A-G-T-A-AT-A-C-A-T-C-GG---A-A-C-GT-G--C-C-CAG--GC-G----T-G-G-G-G-G---AT-AA-C--GA------------------G-G-C-…
>ICSZ4EG01DVMRQ
G-A-T--G-A-A-C-G-C--T-A-G-C--G-A--C-A-G-G---C---T-T--AA-C--AC-A-T-G-C--A-A-G--T-C--GA-G-GG-----------G-CAG--C-G--G----------------G-----------GA-G-G-T-A----------------------GCA-A------------------------------T--A-C-T-T--CC-----------------G-C-C----G--GC--G-------AC-C-G-G-C-GC-A--C--G-GG--T--G-A-G-T-A-AC-A-C-G-T-A-TG---GAA-C-CT-G--C-C-CGT--AG-C----A-G-G-G-G-G---AT-AA-G--CG------------------G-A-A-…
>ICSZ4EG01CS6LQ
A-A-C--G-A-A-C-G-C--T-G-G-C--G-G--C-A-G-G---C---T-T--AA-C--AC-A-T-G-C--A-A-G--T-C--GA-A-CG-C---------G-T---------------------------------------------G-T-A--------------------GCA-A---------------------------T--A--C---------------------------------------AC--G-------AG-T-G-G-C-GC-A--C--G-GG--T--G-A-G-T-A-AC-G-C-G-T-G-GA---T-A-T-CT-G--C-C-TTT--TG-G----T-T-C-G-G-A---AT-AA-C--CC------------------C-G-G-…
>ICSZ4EG01CG569
G-A-T--G-A-A-C-G-C--T-A-G-C--G-G--C-A-G-G---C---T-T--AA-C--AC-A-T-G-C--A-A-G--T-C--GA-G-GG-----------G-CAG--C-G--A----------------G-----------AT---C-A-G-T--------------------GCT-T---------------------------G--C--A-C-TGA--TT-------------------G-TC---G--GC--G-------AC-C-G-G-C-GC-A--C--G-GG--T--G-C-G-T-A-AC-G-C-G-T-A-TG---CAA-C-CT-AC-C-C-ATT--A--C----A-G-G-G-G-G---AT-AA-C--AC------------------T-G-A-…
>ICSZ4EG01BBWS1
G-A-T--G-A-A-C-G-C--T-G-G-C--G-G--C-G-T-G---C---T-T--AA-C--AC-A-T-G-C--A-A-G--T-C--GA-A-CG-G---------G-G----T-G--C----------CTTAG-A-----------AA-G-A-G-G-A--------------------TTC-G---------------------------T--C--C-A-A-T--TGA--TAAGG-----------T-T----A--CC--T-------AG-T-G-G-C-GG-A--C--G-GG--T--G-A-G-T-A-AC-G-C-G-T-G-AG---TAA-C-CT-G--C-C-CTG--GA-G----T-G-G-G-G-A---AT-AA-C-AGC------------------T-G---…
>ICSZ4EG01BE049
A-T-T--G-A-A-C-G-C--T-G-G-C--G-G--C-A-T-G---C---C-T--TA-C--AC-A-T-G-C--A-A-G--T-C--GG-A-CG-----------G-CAG--C-G--C---------------------------------G-G-G-A--------------------GCA-A---------------------------T--C--C-T-------------------------G-G-C----G--GC--G-------AG-T-G-G-C-GA-A--C--G-GG--T--G-A-G-T-A-AT-A-C-A-T-C-GG---A-A-C-AT-G--T-C-CAG--TA-G----T-G-G-G-G-G---AT-AG-C--CC------------------G-G-C-…
>ICSZ4EG01DQ5XX
A-G-C--G-A-A-C-G-C--T-G-G-C--G-G--C-A-G-G---C---C-T--AA-C--AC-A-T-G-C--A-A-G--T-C--GA-A-CG-G---------A-C-----------------------------------------------C-C--------------------TTC-G---------------------------G--G------------------------------------------GT--T-------AG-T-G-G-C-GG-A--C--G-GG--T--G-A-G-T-A-AC-A-C-G-T-G-GG---A-A-C-GT-G--C-C-TTT--AG-G----T-T-C-G-G-A---AT-AG-C--TC------------------C-T-G-…
>ICSZ4EG01DC28G
G-A-T--G-A-A-C-G-C--T-A-G-C--G-G--C-A-G-G---C---T-T--AA-C--AC-A-T-G-C--A-A-G--T-C--GA-G-GG-----------G-CAT--C-G--G----------------G-----------AG-G-G-A-A-G--------------------CTT-G---------------------------C--T--T-T-C-C--TT-----------------G-C-C----G--GC--G-------AC-C-G-G-C-GC-A--C--G-GG--T--G-A-G-T-A-AC-A-C-G-T-A-TG---CAA-C-CT-G--C-C-CTC--TT-C----A-G-G-G-G-G---AC-AA-C--CT------------------T-C-C-…
>ICSZ4EG01CKPMJ
G-A-T--G-A-A-C-G-C--T-G-G-C--G-G--C-G-T-G---C---T-T--AA-C--AC-A-T-G-C--A-A-G--T-C--GA-G-CG-A---------A-G----C-G--G----------TTTAA-A-----------TG-A-A-G-T-T--------------------TTC-G---------------------------G--A--T-G-G-A--TTT--TGAA------------T-T----GA-CT--G-------AG-C-G-G-C-GG-A--C--G-GG--T--G-A-G-T-A-AC-G-C-G-T-G-GG---TAA-C-CT-G--C-C-TCA--TA-C----A-G-G-G-G-G---AT-AA-C--AG------------------T-T-G-…
>ICSZ4EG01C86JU
A-A-C--G-A-A-C-G-C--T-G-G-C--G-G--C-A-T-G---C---C-TA--A-C--AC-A-T-G-C--A-A-G--T-C--GA-A-CG-A---------G-A-----------------------------------------------C-C--------------------TTC-G---------------------------G--G------------------------------------------TC--T-------AG-T-G-G-C-GC-A--C--G-GG--T--G-C-G-T-A-AC-G-C-G-T-G-GG---A-A-T-CT-G--C-C-CTT--GG-G----T-T-C-G-G-A---AT-AA-C--TC------------------G-C-C-…
>ICSZ4EG01DJ5DD
G-A-T--G-A-A-C-G-C--T-A-G-C--G-G--G-A-G-G---C---C-T--AA-C--AC-A-T-G-C--A-A-G--C-C--GA-G-CG-G---------T-A----T-T--T---------------------------------G-T-T-C--------------------TTC-G---------------------------G--A--A-C---------------------------A-G----A--GA--G-------AG-C-G-G-C-GC-A--C--G-GG--T--G-C-G-G-A-AC-A-C-G-T-G-TG---CAA-C-CT-G--C-C-TTT--AT-C----T-G-G-G-G-G---AT-AG-C--CT------------------T-T-C-…
>ICSZ4EG01DK821
A-A-C--G-A-A-C-G-C--T-G-G-C--G-G--C-A-T-G---C---C-TA--A-C--AC-A-T-G-C--A-A-G--T-C--GA-A-CG-A---------G-A-----------------------------------------------C-C--------------------TTC-G---------------------------G--G------------------------------------------TC--T-------AG-T-G-G-C-GC-A--C--G-GG--T--G-C-G-T-A-AC-G-C-G-T-G-GG---A-A-T-CT-G--C-C-TTG--GG-G----T-T-C-G-G-A---AT-AA-C--TC------------------C-C-C-…
>ICSZ4EG01ASVBC
A-A-C--G-A-A-C-G-C--T-G-G-C--G-G--C-A-T-G---C---C-T--AA-C--AC-A-T-G-C--A-A-G--T-C--GA-A-CG-A---------G-A-----------------------------------------------C-C--------------------TTC-G---------------------------G--G------------------------------------------TC--T-------AG-T-G-G-C-GC-A--C--G-GG--T--G-C-G-T-A-AC-G-C-G-T-G-GG---A-A-T-CT-G--C-C-CTT--GG-G----T-T-C-G-G-A---AT-AA-C--TC------------------G-C-C-…
>ICSZ4EG01DQ8RC
G-A-T--G-A-A-C-G-C--T-A-G-C--G-G--G-A-G-G---C---C-T--AA-C--AC-A-T-G-C--A-A-G--C-C--GA-G-CG-G---------C-A----T-T--G---------------------------------T-T-T-C--------------------TTC-G---------------------------G--A--A-A---------------------------T-G----A--GA--G-------TG-C-G-G-C-GT-A--C--G-GG--T--G-C-G-G-A-AC-A-C-G-T-G-TG---CAA-C-CT-G--C-C-TTT--AT-C----T-G-G-G-G-G---AT-AG-C--CT------------------T-T-C-…
>ICSZ4EG01DCBWE
G-A-T--G-A-A-C-G-C--T-A-G-C--G-A--C-A-G-G---C---T-T--AA-C--AC-A-T-G-C--A-A-G--T-C--GA-G-GG-----------G-CAG--C-G--G----------------G-----------GC-A-G-G-A-AG-------------------CTT-G----------------C----------T--T--T-C-T-G--CC-----------------G-C-C----G--GC--G-------AC-C-G-G-C-GC-A--C--G-GG--T--G-A-G-T-A-AC-A-C-G-T-A-TG---CAA-C-CT-G--G-C-CGT--GA-C----A-G-A-T-G-G---AT-AA-C--CG------------------G-G-A-…
>ICSZ4EG01CQHTA
G-A-C--G-A-A-C-G-C--T-G-G-C--G-G--C-G-T-G---C---C-T--AA-T--AC-A-T-G-C--A-A-G--T-A--GA-A-CG-C---------T-G----A-A--G-----------------------------G-A-G-G-A-G--------------------CTT-G---------------------------C--T--T-C-T-C-----------------------T-G----G--AT--G-------AG-T-T-G-C-GA-A--C--G-GG--T--G-A-G-T-A-AC-G-C-G-T-A-GG---TAA-C-CT-G--C-C-TGG--TA-G----C-G-G-G-G-G---AT-AA-C--TA------------------T-T-G-…
>ICSZ4EG01CA4E8
G-A-C--G-A-A-C-G-C--T-G-G-C--G-G--C-G-T-G---C---T-T--AA-C--AC-A-T-G-C--A-A-G--T-C--GA-A-CG-G---------A-G----C-A--C----------CCCTG-A-----------AG-G-A-G-T-T--------------------TTC-G---------------------------G--A--C-A-A-C--GGA--AGGG----------A-A-T----G--CT--T-------AG-T-G-G-C-GG-A--C--T-GG--T--G-A-G-T-A-AC-G-C-G-T-G-AG---GAA-C-CT-G--C-C-TTT--CG-G----A-G-G-G-G-G---AC-AA-C--AG------------------T-T-G-…
>ICSZ4EG01BCG0R
A-T-T--G-A-A-C-G-C--T-G-G-C--G-G--C-A-T-G---C---T-T--TA-C--AC-A-T-G-C--A-A-G--T-C--GA-A-CG-----------G-CAG--C-A--C---------------------------------G-G-G-C--------------------TTC-G---------------------------G--C--C-T-------------------------G-G-T----G--GC--G-------AG-T-G-G-C-GA-A--C--G-GG--T--G-A-G-T-A-AT-G-C-A-T-C-GG---A-A-C-GT-A--C-C-GTG--TA-A----T-G-G-G-G-G---AT-AA-C--GT------------------A-G-C-…
>ICSZ4EG01CG4XY
A-T-T--G-A-A-C-G-C--T-G-G-C--G-G--C-A-T-G---C---C-T--TA-C--AC-A-T-G-C--A-A-G--T-C--GA-A-CG-----------G-TAA--C-G--G-----------------------------------G-TCC--------------------TTCGG---------------------------G--A--T---------------------------G-C-C----G--AC--G-------AG-T-G-G-C-GA-A--C--G-GG--T--G-A-G-T-A-AT-A-C-A-T-C-GG---A-A-C-GT-G--C-C-CGA--TC-G----T-G-G-G-G-G---AT-AA-C--GA------------------A-G-C-…
>ICSZ4EG01DNX7P
A-A-T--G-A-A-C-G-C--T-G-G-C--G-G--C-A-T-G---C---C-T--AA-C--AC-A-T-G-C--A-A-G--T-C--GA-A-CG-A---------G-A-----------------------------------------------C-C--------------------TTC-G---------------------------G--G------------------------------------------TC--T-------AG-T-G-G-C-GC-A--C--G-GG--T--G-C-G-T-A-AC-G-C-G-T-G-GG---A-A-T-CT-G--C-C-CTT--GG-G----T-T-C-G-G-A---AT-AA-C--AG------------------C-T-A-…
>ICSZ4EG01DJ8N4
A-A-C--G-A-G-C-G-C--T-G-G-C--G-G--C-A-T-G---C---C-T--AA-C--AC-A-T-G-C--A-A-G--T-C--GA-A-CG-A---------G-A-----------------------------------------------C-C--------------------TTC-G---------------------------G--G------------------------------------------TC--T-------AG-T-G-G-C-GC-A--C--G-GG--T--G-C-G-T-A-AC-G-C-G-T-G-GG---A-A-T-CT-G--C-C-CTT--GG-G----T-T-C-G-G-A---AT-AA-CA-GC------------------G---A-…
>ICSZ4EG01CXW8T
A-T-T--G-A-A-C-G-C--T-G-G-C--G-G--C-A-T-G---C---C-T--TA-C--AC-A-T-G-C--A-A-G--T-C--GA-A-CG-----------G-TA-----A--C---------------------------------G-G-G----------------------TCC-T---------------------------T--C--G-G-------------------------G-A-T----GCCGAC-G-------AG-T-G-G-C-GA-A--C--G-GG--T--G-A-G-T-A-AT-A-T-A-T-C-GG---A-A-C-GT-G--C-C-CAG--TA-G----T-G-G-G-G-G---AT-AA-C--TG------------------C-T-C-…
>ICSZ4EG01CJQ45
A-A-C--G-A-A-C-G-C--T-G-G-C--G-G--C-A-T-G---C---C-T--AA-C--AC-A-T-G-C--A-A-G--T-C--GA-A-CG-A---------G-A-----------------------------------------------C-C--------------------TTC-G---------------------------G--G------------------------------------------TC--T-------AG-T-G-G-C-GC-A--C--G-GG--T--G-C-G-T-A-AC-G-C-G-T-G-GG---A-A-T-CT-G--C-C-TTG--GG-G----T-T-C-G-G-A---AT-AA-C--TC------------------C-C-C-…
>ICSZ4EG01BIITD
G-A-T--G-A-A-C-G-C--T-A-G-C--G-A--C-A-G-G---C---T-T--AA-C--AC-A-T-G-C--A-A-G--T-C--GA-A-CG-A---------G-A-----------------------------------------------C-C--------------------TTC-G---------------------------G--G------------------------------------------TC--T-------AG-T-G-G-C-GC-A--C--G-GG--T--G-C-G-T-A-AC-G-C-G-T-G-GG---A-A-T-CT-G--C-C-CTT--GG-G----T-T-C-G-G-A---AT-AA-C--TC------------------G-C-C-…
>ICSZ4EG01A2XIT
A-A-C--G-A-A-C-G-C--T-G-G-C--G-G--C-A-G-G---C---T-T--AA-C--AC-A-T-G-C--A-A-G--T-C--GA-A-CG-C---------G-T-----------------------------------------------G-T--------------------AGCAAT--------------------------A--C------------------------------------------AC--G-------AG-T-G-G-C-GC-A--C--G-GG--T--G-A-G-T-A-AC-G-C-G-T-G-GA---T-A-T-CT-G--C-C-TTT--TG-G----T-T-C-G-G-A---AT-AA-C--TC------------------G-C-C-…
>ICSZ4EG01A5WWT
A-A-C--G-A-A-C-G-C--T-G-G-C--G-G--C-A-T-G---C---C-T--AA-C--AC-A-T-G-C--A-A-G--T-C--GA-A-CG-A---------G-A-----------------------------------------------T-C--------------------TTC-G---------------------------G--A------------------------------------------TC--T-------AG-T-G-G-C-GC-A--C--G-GG--T--G-C-G-T-A-AC-G-C-G-T-G-GG---A-A-T-CT-G--C-C-TTG--GG-G----T-T-C-G-G-A---AT-AA-C--TC------------------G-C-C-…
>ICSZ4EG01EZAFM
T---T--G-A-A-C-G-C--T-G-G-C--G-G--C-A-T-G---C---C-T--TA-C--AC-A-T-G-C--A-G-G--T-C--GA-A-CG-----------G-TAA--C-A--G-----------------------------------G-T-C--------------------TTC-G---------------------------G--A--T---------------------------G-C-T----G--AC--G-------AG-T-G-G-C-GA-A--C--G-GG--T--G-A-G-T-A-AT-A-C-A-T-C-GG---A-A-C-GT-G--C-C-CGA--TC-G----T-G-G-G-G-G---AT-AA-C--GA------------------G-G-C-…
>ICSZ4EG01EVHZZ
G-A-C--G-A-A-C-G-C--T-G-G-C--G-G--C-A-T-G---C---C-T--AA-C--AC-A-T-G-C--A-A-G--T-C--GA-A-CG-A---------G-A-----------------------------------------------C-C---------------------TC-----------------------------G--G------------------------------------------TC--T-------AG-T-G-G-C-GC-A--C--G-GG--T--G-C-G-T-A-AC-G-C-G-T-G-GG---A-A-T-CT-G--C-C-CTT--GG-G----T-T-C-G-G-A---AT-AA-C--TC------------------G-C-C-…
>ICSZ4EG01EV7PX
A-A-C--G-A-A-C-G-C--T-G-G-C--G-G--C-A-T-G---C---C-T--AA-C--AC-A-T-G-C--A-A-G--T-C--GA-A-CG-A---------G-A---------------------------------------------T---C--------------------TT--T---------------------------G--G--A---------------------------------------TC--T-------AG-T-G-G-C-GC-A--C--G-GG--T--G-C-G-T-A-AC-G-C-G-T-G-GG---A-A-T-CT-G--C-C-TTG--GG-G----T-T-C-G-G-A---AT-AA-C--TC------------------C-C-C-…
>ICSZ4EG01EU80H
A-A-C--G-A-A-C-G-C--T-G-G-C--G-G--C-A-T-G---C---C-T--AA-C--AC-A-T-G-C--A-A-G--T-C--GA-A-CG-A---------G-A-----------------------------------------------C-C--------------------TTC-G---------------------------G--G------------------------------------------TC--T-------AG-T-G-G-C-GC-A--C--G-GG--T--G-C-G-T-A-AC-G-C-G-T-G-GG---A-A-T-CT-G--C-C-CTT--GG-G----T-T-C-G-G-A---AT-AA-C--TC------------------G-C-C-…
>ICSZ4EG01ETT1T
A-A-C--G-A-A-C-G-C--T-G-G-C--G-G--C-A-T-G---C---C-T--AA-C--AC-A-T-G-C--A-A-G--T-C--GA-A-CG-A---------G-A-----------------------------------------------T-C--------------------TTC-G---------------------------G--A------------------------------------------TC--T-------AG-T-G-G-C-GC-A--C--G-GG--T--G-C-G-T-A-AC-G-C-G-T-G-GG---A-A-T-CT-G--C-C-CTT--GG-G----T-T-C-G-G-A---AT-AA-C--TT------------------G-C-C-…
>ICSZ4EG01ERBP3
A-A-C--G-A-A-C-G-C--T-G-G-C--G-G--C-A-T-G---C---C-T--TA-C--AC-A-T-G-C--A-A-G--T-C--GA-A-CG-----------G-TA-----A--C---------------------------------G-G-G----------------------TCC-T---------------------------T--C--G-G-------------------------G-A-T----GCCGAC-G-------AG-T-G-G-C-GA-A--C--G-GG--T--G-A-G-T-A-AT-A-T-A-T-C-GG---A-A-C-GT-G--C-C-CAG--TA-G----T-G-G-G-G-G---AT-AA-C--TG------------------C-T-C-…
>ICSZ4EG01EQXL8
A-T-T--G-A-A-C-G-C--T-G-G-C--G-G--C-A-T-G---C---C-T--TA-C--AC-A-T-G-C--A-A-G--T-C--GA-A-CG-----------G-TA-----A--C---------------------------------G-G-G-T--------------------CCTCG---------------------------G--G--A-T-------------------------G-C-C----G--AC--G-------AG-T-G-G-C-GA-A--C--G-GG--T--G-A-G-T-A-AT-A-T-A-T-C-GG---A-A-C-GT-G--C-C-CAG--TA-A----T-G-G-G-G-G--AGT-AA-C--TG------------------C-T-C-…
>ICSZ4EG01EONGA
G-G-T--G-A-A-C-G-C--T-A-G-C--G-G--G-A-G-G---C---C-T--AA-C--AC-A-T-G-C--A-A-G--C-C--GA-G-CG-G---------T-A----T-T--G---------------------------------T-T-T-C--------------------TTC-G---------------------------G--A--A-A---------------------------T-G----A--GA--G-------AG-C-G-G-C-GT-A--C--G-GG--T--G-C-G-G-A-GC-A-C-G-T-G-TG---CAA-C-CT-G--C-C-TTT--AT-C----T-G-G-G-G-G---AT-AG-C--CT------------------T-T-C-…
>ICSZ4EG01EO2VU
G-A-T--G-A-A-C-G-C--T-A-G-C--G-G--G-A-G-G---C---C-T--AA-C--AC-A-T-G-C--A-A-G--C-C--GA-G-CG-G---------T-A----T-T--T---------------------------------G-T-T-C--------------------TTC-G---------------------------G--A--A-C---------------------------A-G----A--GA--G-------AG-C-G-G-C-GC-A--C--G-GG--T--G-C-G-G-A-AC-A-C-G-T-G-TG---CAA-C-CT-G--C-C-TTT--AT-C----T-G-G-G-G-G---AT-AG-C--CT------------------T-T-C-…
>ICSZ4EG01A9RZ3
A-T-T--G-A-A-C-G-C--T-G-G-C--G-G--C-A-T-G---C---C-T--TA-C--AC-A-T-G-C--A-A-G--T-C--GA-A-CG-----------G-TA-----A--C---------------------------------A-G-G-T--------------------CTT-C---------------------------G--G--A-T-------------------------G-C-T----G--AC--G-------AG-T-G-G-C-GA-A--C--G-GG--T--G-A-G-T-A-AT-A-C-A-T-C-GG---A-A-C-GT-G--C-C-CGA--TC-G----T-G-G-G-G-G---AT-AA-C--GA------------------A-G-C-…
>ICSZ4EG01EL5PI
G-A-T--G-A-A-C-G-C--T-G-G-C--G-G--C-A-T-G---C---C-T--AA-C--AC-A-T-G-C--A-A-G--T-C--GA-A-CG-A---------G-A-----------------------------------------------C-C--------------------TTC-G---------------------------G--G------------------------------------------TC--T-------AG-T-G-G-C-GC-A--C--G-GG--T--G-C-G-T-A-AC-G-C-G-T-G-GG---A-A-T-CT-G--C-C-CTT--GG-G----T-T-C-G-G-A---AT-AA-C--TT------------------G-C-C-…
>ICSZ4EG01EKWGT
A-A-C--G-A-A-C-G-C--T-G-G-C--G-G--C-A-T-G---C---T-T--AA-C--AC-A-T-G-C--A-A-G--T-C--GA-A-CG-A---------G-A-----------------------------------------------C-C--------------------TTC-G---------------------------G--G------------------------------------------TC--C-------AG-T-G-G-C-GC-A--C--G-GG--T--G-C-G-T-A-AC-G-C-G-T-G-GG---A-A-T-CT-G--C-C-CTT--GG-G----T-T-C-G-G-A---AT-AA-C--TC------------------G-C-C-…
>ICSZ4EG01EIMTX
A-A-C--G-A-A-C-G-C--T-G-G-C--G-G--C-A-T-G---C---C-T--AA-C--AC-A-T-G-C--A-A-G--T-C--GA-A-CG-A---------G-A-----------------------------------------------C-C--------------------TTC-G---------------------------G--G------------------------------------------TC--T-------AG-T-G-G-C-GC-A--C--G-GG--T--G-C-G-T-A-AC-G-C-G-T-G-GG---A-A-T-CT-G--C-C-CTT--GG-G----C-T-C-G-G-A---AT-AA-C--TC------------------G-C-C-…
>ICSZ4EG01EICL2
A-A-C--G-A-A-C-G-C--T-G-A-C--G-G--C-A-T-G---C---C-T--AA-C--AC-A-T-G-C--A-A-G--T-C--GA-A-CG-A---------G-A-----------------------------------------------C-C--------------------TTC-G---------------------------G--G------------------------------------------TC--T-------AG-T-G-G-C-GC-A--C--G-GG--T--G-C-G-T-A-AC-G-C-G-T-G-GG---A-A-T-CT-G--C-C-CTT--GG-G----T-T-C-G-G-A---AT-AA-C--TC------------------G-C-C-…
>ICSZ4EG01EI52P
A-T-T--G-A-A-C-G-C--T-G-G-C--G-G--C-A-T-G---C---C-T--AA-C--AC-A-T-G-C--A-A-G--T-C--GA-A-CG-A---------G-A-----------------------------------------------T-C--------------------TTC-G---------------------------G--A------------------------------------------TC--T-------AG-T-G-G-C-GC-A--C--G-GG--T--G-C-G-T-A-AC-G-C-G-T-G-GG---A-A-T-CT-G--C-C-TTG--GG-G----T-T-C-G-G-A---AT-AA-C--TC------------------C-C-C-…
>ICSZ4EG01EH9D2
A-T-T--G-A-A-C-G-C--T-G-G-C--G-G--C-A-T-G---C---C-T--TA-C--AC-A-T-G-C--A-A-G--T-C--GA-G-CG-----------G-TA-----A--C---------------------------------G-G-G----------------------TCC-T---------------------------T--C--G-G-------------------------G-A-T----GCCGAC-G-------AG-T-G-G-C-GA-A--C--G-GG--T--G-A-G-T-A-AT-A-T-A-T-C-GG---A-A-C-GT-G--C-C-CAG--TA-G----T-G-G-G-G-G---AT-AA-C--TG------------------C-T-C-…
>ICSZ4EG01EF86R
A-A-C--G-A-A-C-G-C--T-G-G-C--G-G--C-A-T-G---C---C-C--AA-C--AC-A-T-G-C--A-A-G--T-C--GA-A-C------------G--AG----A--C---------------------------------C-T-T-C--------------------GGG-A-----------------------------------T-------------------------G-C-C----G--AC--G-------AG-T-G-G-C-GA-A--C--G-GG--T--G-A-G-T-A-AT-A-T-A-T-C-GG---A-A-C-GT-G--C-C-CAG--TA-G----T-G-G-G-G-G---AT-AA-C--TG------------------C-T-C-…
>ICSZ4EG02JSFE1
A-T-T--G-A-A-C-G-C--T-G-G-C--G-G--C-A-T-G---C---C-T--TA-C--AC-A-T-G-C--A-A-G--T-C--GA-A-CG-----------G-TAA--C-A--G---------------------------------G-T-C-T--------------------TCGGA---------------------------T--G--C-T----------------------------------G--AC--G-------AG-T-G-G-C-GA-A--C--G-GG--T--G-A-G-T-A-AT-A-C-A-T-C-GG---A-A-C-AT-G--T-C-CAG--TA-G----T-G-G-G-G-G---AT-AG-C--CC------------------G-G-C-…
>ICSZ4EG01E0AO3
A-A-C--G-A-A-C-G-C--T-G-G-C--G-G--C-A-T-G---C---C-T--AA-C--AC-A-T-G-C--A-A-G--T-C--GA-A-CG-A---------G-A-----------------------------------------------C-C--------------------TTC-A---------------------------G--G------------------------------------------TC--T-------AG-T-G-G-C-GC-A--C--G-GG--T--G-C-G-T-A-AC-G-C-G-T-G-GG---A-A-T-CT-G--C-C-CTT--GG-G----T-T-C-G-G-A---AT-AA-C--TC------------------G-C-C-…
>ICSZ4EG01DWK3I
A-A-C--G-A-A-C-G-C--T-G-G-C--G-G--C-A-C-G---C---C-T--AA-C--AC-A-T-G-C--A-A-G--T-C--GA-A-CG-A---------G-A-----------------------------------------------C-C--------------------TTC-G---------------------------G--G------------------------------------------TC--T-------AG-T-G-G-C-GC-G--C--G-GG--T--G-C-G-T-A-AC-G-C-G-T-G-GG---A-A-T-CT-G--C-C-CTT--GG-G----T-T-C-G-G-A---AT-AA-C--TC------------------G-C-C-…
>ICSZ4EG01DS8U5
A-T-T--G-A-A-C-G-C--T-G-G-C--G-G--C-A-T-G---C---C-T--TA-C--AC-A-T-G-C--A-A-G--T-C--GA-A-CG-----------G-TAG-------C---------------------------------G-G-G----------------------TCC-T---------------------------T--C--G-G-------------------------G-A-T----GCCGAC-G-------AG-T-G-G-C-GA-A--C--G-GG--T--G-A-G-T-A-AT-A-T-A-T-C-GG---A-A-C-GT-G--C-C-CAG--TA-G----T-G-G-G-G-G---AT-AA-C--TG------------------C-T-C-…
>ICSZ4EG01DNDU4
A-T-T--G-A-A-C-G-C--T-G-G-C--G-G--C-A-T-G---C---C-T--TA-C--GC-A-T-G-C--A-A-G--T-C--GA-A-CG-----------G-TAA--C-A--G-----------------------------------G-T-C--------------------TTC-G---------------------------G--A--T---------------------------G-C-T----G--AC--G-------AG-T-G-G-C-GA-A--C--G-GG--T--G-A-G-T-A-AT-A-C-A-T-C-GG---A-A-C-GT-G--C-C-CGA--TC-G----T-G-G-G-G-G---AT-AA-C--GA------------------A-G-C-…
>ICSZ4EG01DK3JK
A-A-C--G-A-A-C-G-C--T-G-G-C--G-G--C-A-G-G---C---T-T--AA-C--AC-G-T-G-C--A-A-G--T-C--GA-A-CG-A---------G-A-----------------------------------------------C-C--------------------TTC-G---------------------------G--G------------------------------------------TC--T-------AG-T-G-G-C-GC-A--C--G-GG--T--G-C-G-T-A-AC-G-C-G-T-G-GG---A-A-T-CT-G--C-C-CTT--GG-G----T-T-C-G-G-A---AT-AA-C--TC------------------G-C-C-…
>ICSZ4EG01DK14Y
A-A-C--G-A-A-C-G-C--T-G-G-C--G-G--C-A-T-G---C---C-T--AA-C--AC-A-T-G-C--A-A-G--T-C--GA-G-CG-G---------G-C---------------------------------------------A-T-A--------------------GCA-A---------------------------T--A--T---------------------------------------GT--C-------AG-C-G-G-C-AG-A--C--G-GG--T--G-A-G-T-A-AC-G-C-G-T-G-GG---A-A-C-GT-A--C-C-TTT--TG-G----T-T-C-G-G-A---AC-AA-C--TG------------------A-G-G-…
>ICSZ4EG02FL3EA
A-T-T--G-A-A-C-G-C--T-G-G-C--G-G--C-A-T-G---C---C-T--TA-C--AC-A-T-G-C--A-A-G--T-C--GA-A-CG-----------G-TAA--C-A--G---------------------------------G-T-C-T--------------------TCGGA---------------------------T--G--C-T----------------------------------G--AC--G-------AG-T-G-G-C-GA-A--C--G-GG--T--G-A-G-T-A-AT-A-C-A-T-C-GG---A-A-C-GT-G--C-C-CGA--TC-G----T-G-G-G-G-G---AT-AA-C--GA------------------G-G-C-…
>ICSZ4EG01D7OC7
A-T-T--G-A-A-C-G-C--T-G-G-C--G-G--C-A-T-G---C---C-T--TA-C--AC-A-T-G-C--A-A-G--T-C--GA-A-CG-----------G-TA-----A--C---------------------------------G-G-G----------------------TCC-T---------------------------T--CGGAAT-------------------------G-C-C----G--AC--G-------AG-T-G-G-C-GA-A--C--G-GG--T--G-A-G-T-A-AT-A-T-A-T-C-GG---A-A-C-GT-G--C-C-CAG--TA-G----T-G-G-G-G-G---AT-AA-C--TG------------------C-T-C-…
>ICSZ4EG01D7NGP
A-A-C--G-A-A-C-G-C--T-G-G-C--G-G--C-G-T-G---C---C-T--AA-C--AC-A-T-G-C--A-A-G--T-C--GA-A-CG-A---------G-A-----------------------------------------------T-C--------------------TTC-G---------------------------G--A------------------------------------------TC--T-------AG-T-G-G-C-GC-A--C--G-GG--T--G-C-G-T-A-AC-G-C-G-T-G-GG---A-A-T-CT-G----C-CTT--GG-G----T-T-C-G-G-A---AT-AA-C--TC------------------G-C-C-…
>ICSZ4EG01D71M6
A-A-C--G-A-A-C-G-C--T-G-G-C--G-G--C-A-G-G---C---T-T--AA-C--AC-A-T-G-C--A-A-G--T-C--GA-A-CG-----------G-TAA--C-A--G-----------------------------------G-T-C--------------------TTC-G---------------------------G--A--T---------------------------G-C-T----G--AC--G-------AG-T-G-G-C-GA-A--C--G-GG--T--G-A-G-T-A-AT-A-C-A-T-C-GG---A-A-C-GT-G--C-C-CGA--TC-G----T-G-G-G-G-G---AT-AA-C--GA------------------A-G-C-…
>ICSZ4EG01D675S
G-A-T--G-A-A-C-G-C--T-A-G-C--G-G--G-A-G-G---C---C-T--AA-C--AC-A-T-G-C--A-A-G--C-C--GA-G-CG-G---------T-A----T-T--G---------------------------------T-T-T-C--------------------TTC-G---------------------------G--A--A-A---------------------------T-G----A--GA--G-------AG-C-G-G-C-GT-A--C--G-GG--T--G-C-G-G-A-AC-A-C-G-T-G-TG---CAA-C-CT-G--C-C-TTT--AT-C----T-G-G-G-G-G---AT-AG-C--CT------------------T-T-C-…
>ICSZ4EG01D5VLK
A-A-C--G-A-A-C-G-C--T-G-G-C--G-G--C-A-T-G---C---C-T--AA-C--AC-A-T-G-C--A-A-G--T-C--GA-G-CG-C---------C-C-------------------------------------------------C--------------------GCA-A---------------------------G---------------------------------------------GG--G-------AG-C-G-G-C-AG-A--C--G-GG--T--G-A-G-T-A-AC-G-C-G-T-G-GG---A-A-T-CT-A--C-C-CAT--CT-C----T-A-C-G-G-A---AT-AA-C--GC------------------A-T-G-…
>ICSZ4EG01EE8QS
G-A-T--G-A-A-C-G-C--T-A-G-C--G-G--C-A-G-G---C---T-T--AA-C--AC-A-T-G-C--A-A-G--T-C--GA-G-GG-----------G-CAT--C-G--G----------------G-----------AG-G-G-A-A----------------------GC--T------------------------------T--G-CTT-TCCTT-----------------G-C-C----G--GC--G-------AC-C-G-G-C-GC-A--C--G-GG--T--G-A-G-T-A-AC-A-C-G-T-A-TG---AAA-C-CT-G--C-C-CGT--AG-C----A-G-G-G-G-G---AT-AA-G--CG------------------G-A-A-…
>ICSZ4EG01D5AVV
A-A-C--G-A-A-C-G-C--T-G-G-C--G-G--C-A-T-G---C---C-T--AA-C--AC-A-T-G-C--A-A-G--T-C--GA-A-CG-A---------G-A-----------------------------------------------T-C--------------------TTC-G---------------------------G--A------------------------------------------TC--T-------AG-T-G-G-C-GC-A--C--G-GG--T--G-C-G-T-A-AC-G-C-G-T-G-GG---A-A-T-CT-G--C-C-TTG--GG-G----T-T-C-G-G-A---AT-AA-C--TC------------------C-C-C-…
>ICSZ4EG01CUBBS
A-A-C--G-A-A-C-G-C--T-G-G-C--G-G--C-A-T-G---C---C-C--AA-C--AC-A-T-G-C--A-G-G--T-C--GA-A-CG-A---------G-A-----------------------------------------------C-C--------------------TTC-G---------------------------G--G------------------------------------------TC--T-------AG-T-G-G-C-GC-A--C--G-GG--C--G-C-G-T-A-AC-G-C-G-T-G-GG---A-A-T-CT-G--C-C-CTT--GG-G----T-T-C-G-G-A---AT-AA-C--TC------------------G-C-C-…
>ICSZ4EG01CPLZH
G-A-C--G-A-A-C-G-C--T-G-G-C--G-G--C-A-T-G---C---C-T--AA-C--AC-A-T-G-C--A-A-G--T-C--GA-A-CG-A---------G-A-----------------------------------------------C-C--------------------TTC-G---------------------------G--G------------------------------------------TC--T-------AG-T-G-G-C-GC-A--C--G-GG--T--G-C-G-T-A-AC-G-C-G-T-G-GG---A-A-T-CT-G--C-C-CTT--GG-G----T-T-C-G-G-A---AT-AA-C--CC------------------G-C-C-…
>ICSZ4EG01CPCAM
G-A-T--G-A-A-C-G-C--T-A-G-C--G-G--G-A-G-G---C---C-T--AA-C--AC-A-T-G-C--A-A-G--C-C--GA-G-CG-G---------T-A----T-T--G---------------------------------T-T-T-C--------------------TTC-G---------------------------G--A--A-A---------------------------T-G----A--GA--G-------AG-C-G-G-C-GT-A--C--G-GG--T--G-C-G-G-A-AC-A-C-G-T-G-TG---CAA-C-CT-G--C-C-TTT--AT-C----T-G-G-G-G-G---AT-AG-C--CT------------------T-T-C-…
>ICSZ4EG01CNYM2
G-A-T--G-A-A-C-G-C--T-A-G-C--G-G--G-A-G-G---C---C-T--AA-C--AT-A-T-G-C--A-A-G--C-C--GA-G-CG-G---------T-A----T-T--G---------------------------------T-T-T-T--------------------TTC-G---------------------------G--A--A-A---------------------------T-G----A--GA--G-------AG-C-G-G-C-GT-A--C--G-GG--T--G-C-G-G-A-AC-A-C-G-T-G-TG---CAA-C-CT-G--C-C-TTT--AT-C----T-G-G-G-G-G---AT-AG-C--CT------------------T-T-C-…
>ICSZ4EG01CKOFU
A-A-C--G-A-A-C-G-C--T-G-G-C--G-G--C-A-T-G---C---C-T--AA-C--AC-A-T-G-C--A-A-G--T-C--GA-A-CG-A---------G-A-----------------------------------------------C-C--------------------TT--G---------------------------G--G------------------------------------------TC--T-------AG-T-G-G-C-GC-A--C--G-GG--T--G-C-G-T-A-AC-G-C-G-T-G-GG---A-A-T-CT-G--C-C-CTT--GG-G----T-T-C-G-G-A---AT-AA-C--CC------------------G-C-C-…
>ICSZ4EG01CKFK0
A-T-T--G-A-A-C-G-C--T-G-G-C--G-G--C-A-G-G---C---C-T--AA-C--AC-A-T-G-C--A-A-G--T-C--GA-G-CG-----------G-AT---G-A--C-------------------------------G-G-G-A-G--------------------CTT-G---------------------------C--T--C-C-T-------------------------T-G----A--TT--C-------AG-C-G-G-C-GG-A--C--G-GG--T--G-A-G-T-A-AT-G-C-C-T-A-GG---A-A-T-CT-G--C-C-TGG--TA-G----T-G-G-G-G-G---AC-AA-C--GT------------------T-T-C-…
>ICSZ4EG01CH9XR
G-A-C--G-A-A-C-G-C--T-G-G-C--G-G--C-G-T-G---C---T-T--AA-C--AC-A-T-G-C--A-A-G--T-C--GA-A-CG-G---------A-G----C-A--C----------CCCTG-A-----------AG-G-A-G-T-T--------------------TTC-G---------------------------G--A--C-A-A-C--GGA--AGGG----------A-A-T----G--CT--T-------AG-T-G-G-C-GG-A--C--T-GG--T--G-A-G-T-A-AC-G-T-G-T-G-AG---GAA-C-CT-G--C-C-TTT--CG-G----A-G-G-G-G-G---AC-AA-C--AG------------------T-T-G-…
>ICSZ4EG01CDBU5
A-G-C--G-A-A-C-G-C--T-G-G-C--G-G--C-A-G-G---C---T-T--AA-C--AC-A-T-G-C--A-A-G--T-C--GA-A-CG-A---------G-A-----------------------------------------------C-C--------------------TTC-G---------------------------G--G------------------------------------------TC--T-------AG-T-G-G-C-GC-A--C--G-GG--T--G-C-G-T-A-AC-G-C-G-T-G-GG---A-A-T-CT-G--C-C-CTT--GG-G----T-T-C-G-G-A---AT-AA-C--TC------------------G-T-C-…
>ICSZ4EG01CCC1X
A-A-C--G-A-A-C-G-C--T-G-G-C--G-A--C-A-T-G---C---C-T--AA-C--AC-A-T-G-C--A-A-G--T-C--GA-A-CG-A---------G-A-----------------------------------------------C-C--------------------TTC-G---------------------------G--G------------------------------------------TC--T-------AG-T-G-G-C-GC-A--C--G-GG--T--G-C-G-T-A-AC-G-C-G-T-G-GG---A-A-T-CC-G--C-C-CTT--GG-G----T-T-C-G-G-A---AT-AA-C--CC------------------G-C-C-…
>ICSZ4EG01CBT5V
A-T-T--G-A-A-C-G-C--T-G-G-C--G-G--C-A-T-G---C---C-T--TA-C--AC-A-T-G-C--A-A-G--T-C--GA-A-CG-----------G-TAA--C-G--------------------------------------G-G-T--------------------CCT-T---------------------------CGGGA-T---------------------------G-C-C----G--AC--G-------AG-T-G-G-C-GA-A--C--G-GG--T--G-A-G-T-A-AT-A-T-A-T-C-GG---A-A-C-GT-G--C-C-CAG--TA-G----T-G-G-G-G-G---AT-AA-C--TG------------------C-T-C-…
>ICSZ4EG01C8ILN
A-T-T--G-A-A-C-G-C--T-G-G-C--G-G--C-A-T-G---C---C-T--TA-C--AC-A-T-G-C--A-A-G--T-C--GA-A-CG-----------G-TA-----A--C---------------------------------G-G-G----------------------TCC-T---------------------------T--C--G-G-------------------------G-A-T----GCCGAC-G-------AG-T-G-G-C-GA-A--C--G-GG--T--G-A-G-T-A-AT-A-T-A-T-C-GG---A-A-C-GT-G--C-C-CAG--TA-G----T-G-G-G-G-G--AGT-AA-C--TG------------------C-T-C-…
>ICSZ4EG01C7QXN
A-A-C--G-A-A-C-G-C--T-G-G-C--G-G--C-A-T-G---C---C-T--AA-C--GC-A-T-G-C--A-A-G--T-C--GA-A-CG-A---------G-A-----------------------------------------------C-C--------------------TTC-G---------------------------G--G------------------------------------------TC--T-------AG-T-G-G-C-GC-A--C--G-GG--T--G-C-G-T-A-AC-G-C-G-T-G-GG---A-A-T-CT-G--C-C-CTT--GG-G----T-T-C-G-G-A---AT-AA-C--TC------------------G-C-C-…
>ICSZ4EG01C5P4E
G-A-T--G-A-A-C-G-C--T-A-G-C--G-G--C-A-G-G---C---T-T--AA-C--AC-A-T-G-C--A-A-G--T-C--GA-G-GG-----------G-CAT--C-G--G----------------G-----------AG-G-G-A---AG-------------------CTT-G----------------C----------T--T--T-C---C--TT-----------------G-C-C----G--GC--G-------AC-C-G-G-C-GC-A--C--G-GG--T--G-A-G-T-A-AC-A-C-G-T-A-TG---CAA-C-CT-G----C-C-C--CT-C----T-G-G-A-G-G---AC-CT-A--CC------------------T-A-C-…
>ICSZ4EG01C57QX
A-A-C--G-A-A-C-G-C--T-G-G-C--G-G--C-A-T-G---C---C-T--AA-C--AC-A-T-G-C--A-A-G--T-C--GA-A-CG-----------G-A-------------------------------------------------C---------------------TC--------------------------------G------------------------------------------TC-----------G-T-T-G---GC----C--G-GG--G--A-C-G-----AC-G---G---G-AG-----A----T------C-CTC--GG-T----G-T-C-G-G-A---AT-AA-C--TC------------------G-C-C-…
>ICSZ4EG01C43J4
A-T-T--G-A-A-C-G-C--T-G-G-C--G-G--C-A-T-G---C---C-T--TA-C--AC-A-T-G-C--A-A-G--T-C--GA-A-CG-----------G-TA-----A--C---------------------------------G-G-G----------------------TC--C---------------------------T--C--C-G-------------------------G-GAT----GCCGAC-G-------AG-T-G-G-C-GA-A--C--G-GG--T--G-A-G-T-A-AT-A-T-A-T-C-GG---A-A-C-GT-A--C-C-CAG--TA-G----T-G-G-G-G-G---AT-AA-C--TG------------------C-T-C-…
>ICSZ4EG01BYTJ8
A-A-C--G-A-A-C-G-C--T-G-G-C--G-G--C-A-T-G---C---C-TA--A-C--AC-A-T-G-C--A-A-G--T-C--GA-A-CG-A---------G-A-----------------------------------------------C-C--------------------TTC-G---------------------------G--G------------------------------------------TC--T-------AG-T-G-G-C-GC-A--C--G-GG--T--G-C-G-T-A-AC-G-C-G-T-G-GG---A-A-T-CT-G--C-C-CTT--GG-G----T-T-C-G-G-A---AT-AA-C--TC------------------G-C-C-…
>ICSZ4EG01BY1AK
A-A-C--G-A-A-C-G-C--T-G-G-C--G-G--C-A-T-G---C---C-T--AA-C--AC-A-T-G-C--A-A-G--T-C--GA-A-CG-A---------G-A-----------------------------------------------C-C--------------------TTC-G---------------------------G--G------------------------------------------TCG-T-------AG-T-G-G-C-GC-A--C--G-GG--T--G-C-G-T-A-AC-G-C-G-T-G-GG---A-A-T-CT-G--C-C-CTT--GG-G----T-T-C-G-G-A---AT-AA-C--TC------------------G-C-C-…
>ICSZ4EG01BX217
G-A-C--G-A-A-C-G-C--T-G-G-C--G-G--C-A-T-G---C---C-T--AA-C--AC-A-T-G-C--A-A-G--T-C--GA-A-CG-A---------G-A-----------------------------------------------C-C--------------------TTC-G---------------------------G--G------------------------------------------TC--T-------AG-T-G-G-C-GC-A--C--G-GG--T--G-C-G-T-A-AC-G-C-G-T-G-GG---A-A-T-CT-G--C-C-CTT--GG-G----T-T-C-G-G-A---AT-AA-C--TC------------------C-C-C-…
>ICSZ4EG01BTK6X
A-A-C--G-A-A-C-G-C--T-G-G-C--G-G--C-A-T-G---C---C-T--AA-C--AC-A-T-G-C--A-AGG--T-C--GA-A-CG-A---------G-A-----------------------------------------------C-C--------------------TTC-G---------------------------G--G------------------------------------------TC--T-------AG-T-G-G-C-GC-A--C--G-GG--T--G-C-G-T-A-AC-G-C-G-T-G-GG---A-A-C-CT-G--C-C-CTT--GG-G----T-T-C-G-G-A---AT-AA-C--TC------------------G-C-C-…
>ICSZ4EG01BS8TP
G-A-C--G-A-A-C-G-C--T-G-G-C--G-G--C-G-T-G---C---C-T--AA-T--AC-A-T-G-C--A-A-G--T-C--GA-A-CG-A---------A-CC---G-C--A----------------------------AC-T-T-G-A-A--------------------CTT-G------------------------------T--T-C-T-CG-T------------------T-A-A----G--GT--T-------AG-T-G-G-C-GC-A--C--G-GG--T--G-A-G-T-A-AC-A-C-G-T-G-GG---GAA-C-CT-G--C-C-CTT--TA-G----T-G-G-G-G-G---AT-AA-C--AG------------------T-C-G-…
>ICSZ4EG01BRZDD
A-T-T--G-A-A-C-G-C--T-G-G-C--G-G--C-A-T-G---C---C-T--TA-C--AC-A-T-G-C--A-A-G--T-C--GA-A-CG-----------G-TA-----A--C---------------------------------G-G-G----------------------TCC-T---------------------------T--C--G-G-------------------------G-A-T----GCCGAC-G-------AG-T-G-G-C-GA-A--C--G-GG--T--G-A-G-T-A-AT-A-T-A-T-C-GG---A-A-C-GT-G--C-C-CAG--TA-G----T-G-G-G-G-G---AT-AA-C--TG------------------C-T-C-…
>ICSZ4EG01BNAV4
A-A-C--G-A-A-C-G-C--T-G-G-C--G-G--C-A-T-G---C---C-T--AA-C--AC-A-T-G-C--A-G-G--T-C--GA-A-CG-----------G-TA-----A--C---------------------------------G-G-G----------------------TCC-T---------------------------T--C--G-G-------------------------G-A-T----GCCGAC-G-------AG-T-G-G-C-GA-A--C--G-GG--T--G-A-G-T-A-AT-A-T-A-T-C-GG---A-A-C-GT-G--C-C-CAG--TA-G----T-G-G-G-G-G---AT-AA-C--TG------------------C-T-C-…
>ICSZ4EG01BM5JR
A-A-C--G-A-A-C-G-C--T-G-G-C--G-G--C-A-T-G---C---C-T--AA-C--AC-A-T-G-C--A-A-G--T-C--GA-A-CG-A---------G-A-----------------------------------------------C-C--------------------TTC-G---------------------------G--G------------------------------------------TC--T-------AG-T-G-G-C-GC-A--C--G-GG--T--G-C-G-T-A-AC-G-C-G-T-G-GG---A-A-T-CT-G--C-C-CTT--GG-G----T-T-C-G-G-A---AT-AA-C--TC------------------G-C-C-…
>ICSZ4EG01BJVDB
G-A-T--G-A-A-C-G-C--T-A-G-C--G-A--C-A-G-G---C---T-T--AA-C--AC-A-T-G-C--A-A-G--T-C--GA-G-GG-----------G-CAG--CAG--G----------------G-----------GA---G-T-A----------------------GCA-A------------------------------T--A-C-T-C--CC-----------------G-C-C----G--GC--G-------AC-C-G-G-C-GC-A--C--G-GG--T--G-A-G-T-A-AC-A-C-G-T-A-TG---AAA-C-CT-G--C-C-CGT--AG-C----A-G-G-G-G-G---AT-AA-G--CG------------------G-A-A-…
>ICSZ4EG01BITDP
A-A-C--G-A-A-C-G-C--T-G-G-C--G-G--C-A-T-G---C---C-T--AA-C--AC-A-T-G-C--A-A-G--T-C--GA-A-CG-A---------G-A-----------------------------------------------C-C--------------------TTC-G---------------------------G--G------------------------------------------TC--T-------AG-T-G-G-C-GC-A--C--G-GG--T--G-C-G-T-A-AC-G-C-G-T-G-GG---A-A-T-CT-G--C-C-CTT--GG-G----T-T-C-G-G-A---AT-AA-C--AG------------------T-G-A-…
>ICSZ4EG01BHOTA
A-A-C--G-A-A-C-G-C--T-G-G-C--G-G--C-A-T-G---C---C-T--AA-C--AC-A-T-G-C--A-A-G--T-C--GA-A-CG-A---------G-A-----------------------------------------------C-C--------------------TTC-G---------------------------G--G------------------------------------------TC--T-------AG-T-G-G-C-GC-A--C--G-GG--T--G-C-G-T-A-AC-G-C-G-T-G-GG---A-A-T-CT-G--C-C-CTT--GG-G----C-A-C-G-G-A---AT-AA-C--TC------------------G-C-C-…
>ICSZ4EG01BGEOC
G-A-T--G-A-A-C-G-C--T-G-G-C--G-G--C-G-T-G---C---T-T--AA-C--AC-A-T-G-C--A-A-G--T-C--GA-A-C--G-----------G----A-C--T----------C-AT--A-----------TT-G-A-A-A-C--------------------CT--A---------------------------G-----T-G---A---TT--TATG--------------A-------GT--T-------AG-T-G-G-C-GG-A--C--G-GG--T--G-A-G-T-A-AC-G-C-G-T-G-GA---TAA-C-CT-G--C-C-GTA--TA-C----C-G-G-G-G-G---AT-AA-C--AC------------------T-T-G-…
>ICSZ4EG01BFBFL
A---T--G-A-A-C-G-C--T-G-G-C--G-G--C-G-T-G---C---T-T--AA-C--AC-A-T-G-C--A-A-G--T-C--GA-A-CG-----------G-TA-----A--C---------------------------------G-G-G----------------------TCC-T---------------------------T--C--G-G-------------------------GAG-T----GCCGAC-G-------AG-T-G-G-C-GA-A--C--G-GG--T--G-A-G-T-A-AT-A-T-A-T-C-GG---A-A-C-GT-G--C-C-CAG--TA-G----T-G-G-G-G-G---AT-AA-C--TG------------------C-T-C-…
>ICSZ4EG01B94Y8
A-A-C--G-A-A-C-G-C--T-G-G-C--G-G--C-A-T-G---C---C-T--AA-C--AC-A-T-G-C--A-A-G--C-C--GA-A-CG-A---------G-A-----------------------------------------------C-C--------------------TTC-G---------------------------G--G------------------------------------------TC--T-------AG-T-G-G-C-AC-A--C--G-GG--T--G-C-G-T-A-AC-G-C-G-T-G-GG---A-A-T-CT-G--C-C-CTT--GG-G----T-T-C-G-G-A---AT-AA-C--TC------------------G-C-CG…
>ICSZ4EG01B6VQB
G-A-T--G-A-A-C-G-C--T-G-G-C--G-G--C-G-T-G---C---C-T--AA-C--AC-A-T-G-C--A-A-G--T-C--GA-A-CG-G---------A-GCCTTA-TCAG---------CAGAAG-------------CA-T-C-C-A-G-CTTG---------------CTG-G-----------AAGCGG----------A--A--G-A-A-----GA--AAAG-------------------G--CT--T-------AG-T-G-G-C-GG-A--C--G-GG--T--G-A-G-T-A-AC-G-C-G-T-G-GG---TAA-C-CT-G--G-C-CCA--TA-C----A-G-G-G-G-G---AT-AA-C--AC------------------T-T-A-…
>ICSZ4EG01B5XVU
A-T-T--G-A-A-C-G-C--T-G-G-C--G-G--C-A-T-G---C---C-T--TA-C--AC-A-T-G-C--A-A-G--T-C--GA-A-CG-----------G-TA-----A--C---------------------------------G-G-G----------------------TCC-T---------------------------T--C--G-G-------------------------G-A-T----GCCGAC-G-------AG-T-G-G-C-GA-A--C--G-GG--T--G-A-G-T-A-AT-A-T-A-T-C-GG---A-A-C-GT-G--C-C-CAG--TA-G----T-G-G-G-G-G---AT-AA-C--TG------------------C-T-C-…
>ICSZ4EG01B3JFW
G-A-T--G-A-A-C-G-C--T-A-G-C--G-G--G-A-G-G---C---C-T--AA-C--AC-A-T-G-C--A-A-G--C-C--GA-G-CG-G---------T-A----T-T--G---------------------------------T-T-T-C--------------------TTC-G---------------------------G--A--A-A---------------------------T-G----A--GA--G-------AG-C-G-G-C-GC-A--C--G-GG--T--G-C-G-G-A-AC-A-C-G-T-G-TG---CAA-C-CT-G--C-C-TTT--AT-C----T-G-G-G-G-G---AT-AG-C--CT------------------T-T-C-…
>ICSZ4EG01B220Z
A-A-C--G-A-A-C-G-C--T-G-G-T--G-G--C-A-T-G---C---C-T--AA-C--AC-A-T-G-C--A-A-G--T-C--GA-A-CG-A---------G-A-----------------------------------------------C-C--------------------TTC-G---------------------------G--G------------------------------------------TC--T-------AG-T-G-G-C-GC-A--C--G-GG--T--G-C-G-T-A-AC-G-C-G-T-G-GG---A-A-T-CT-G--C-C-CTT--GG-G----T-T-C-G-G-A---AT-AA-C--TC------------------G-C-CG…
>ICSZ4EG01AZSGY
A-T-T--G-A-A-C-G-C--T-G-G-C--G-G--C-A-T-G---C---C-T--TA-C--AC-A-T-G-C--A-A-G--T-C--GA-ACGGTAACGG-----G-T-----------------------------------------------C-C--------------------TTC-G---------------------------G--G------------------------------------------TC--T-------AG-T-G-G-C-GC-A--C--G-GG--T--G-C-G-T-A-AC-G-C-G-T-G-GG---A-A-T-CT-G--C-C-CTT--GG-G----T-T-C-G-G-A---AT-AA-C--TC------------------G-C-C-…
>ICSZ4EG01AX3QM
A-T-T--G-A-A-C-G-C--T-G-G-C--G-G--C-A-T-G---C---C-T--TA-C--AC-A-T-G-C--A-A-G--T-C--GA-A-CG-----------G-TAA--C-A--G-----------------------------------G-T-C--------------------TTC-G---------------------------G--A--T---------------------------G-C-T----G--AC--G-------AG-T-G-G-C-GA-A--C--G-GG--T--G-A-G-T-A-AT-A-C-A-T-C-GG---A-A-C-GT-G--C-C-CGA--TC-G----C-G-G-G-G-G---AT-AA-C--GA------------------G-G-C-…
>ICSZ4EG01ATVEU
A-G-C--G-A-A-C-G-C--T-G-G-C--G-G--C-A-G-G---C---C-T--AA-C--AC-A-T-G-C--A-A-G--T-C--GA-A-CG-G---------A-C-----------------------------------------------C-C--------------------TTC-G---------------------------G--G------------------------------------------GT--T-------AG-T-G-G-C-GG-A--C--G-GG--T--G-A-G-T-A-AC-A-C-G-T-G-GG---A-A-C-GT-G--C-C-TTT--AG-G----T-T-C-G-G-A---AT-AG-C--TC------------------C-T-G-…
>ICSZ4EG01AQK6X
A-A-C--G-A-A-C-G-C--T-G-G-C--G-G--C-A-T-G---C---C-T--AA-C--AC-A-T-G-C--A-A-G--T-C--GA-A-CG-A---------G-A-----------------------------------------------C-C--------------------TTC-G---------------------------G--G------------------------------------------TC--T-------AG-T-G-G-C-GC-A--C--G-GG--T--G-C-G-T-A-AC-G-C-G-T-G-GG---A-A-T-CT-G--C-C-TTG--GG-G----T-T-C-G-G-A---AT-AA-C--TC------------------C-C-C-…
>ICSZ4EG01APHKZ
A-A-C--G-A-A-C-G-C--T-G-G-C--G-G--C-A-T-G---C---C-T--AA-C--AC-A-T-G-C--A-A-G--T-C--GA-A-CG-A---------G-A-----------------------------------------------C-C--------------------TTC-G---------------------------G--G------------------------------------------TC--T-------AG-T-G-G-C-GC-A--C--G-GG--T--G-C-G-T-A-AC-G-C-G-T-G-GG---A-A-T-CT-G--C-C-CTT--GG-G----T-T-CGG-G-A---AT-AA-C--TC------------------G-C-C-…
>ICSZ4EG01AO1ZD
G-A-T--G-A-A-C-G-C--T-A-G-C--G-G--G-A-G-G---C---C-T--AA-C--AC-A-T-G-C--A-A-G--C-C--GA-G-CG-G---------T-A----T-T--G---------------------------------T-T-T-C--------------------TTC-G---------------------------G--A--A-A---------------------------T-G----A--GT--G-------AG-C-G-G-C-GT-A--C--G-GG--T--G-C-G-G-A-AC-A-C-G-C-G-TG---CAA-C-CT-G--C-C-TTT--AT-C----T-G-G-G-G-G---AT-AG-C--CT------------------T-T-C-…
>ICSZ4EG01AKWSF
G-A-T--G-A-A-C-G-C--T-G-G-C--G-G--C-G-T-G---C---C-T--AA-C--AC-A-T-G-C--A-A-G--T-C--GA-A-CG-G---------A-GCCTTA-TCAG---------CAGAAG-------------CA-T-C-C-A-G-CTTG---------------CTG-G-----------AAGCGG----------A--A--G-A-A-----GA--AAAG-------------------G--CT--T-------AG-T-G-G-C-GG-A--C--G-GG--T--G-A-G-T-A-AC-G-C-G-T-G-GG---TAA-C-CT-G--G-C-CCA--TA-C----A-G-G-G-G-G---AT-AA-C--AC------------------T-T-A-…
>ICSZ4EG01AKQQB
A-A-C--G-A-A-C-G-C--C-G-G-C--G-G--C-A-T-G---C---C-T--AA-C--AC-A-T-G-C--A-A-G--T-C--GA-A-CG-A---------G-A-----------------------------------------------C-C--------------------TTC-G---------------------------G--G------------------------------------------TC--T-------AG-T-G-G-C-GC-A--C--G-GG--T--G-C-G-T-A-AC-G-C-G-T-G-GG---A-A-T-CT-G--C-C-CTT--GG-G----T-T-C-G-G-A---AT-AA-C--TC------------------G-C-C-…
>ICSZ4EG01A6NA9
A-A-C--G-A-A-C-G-C--T-G-G-C--G-G--C-A-T-G---C---C-C--AA-C--AC-A-T-G-C--A-A-G--T-C--GA-A-CG-A---------G-A-----------------------------------------------T-C--------------------TTC-G---------------------------G--G------------------------------------------TC--T-------AG-T-G-G-C-GC-A--C--G-GG--T--G-C-G-T-A-AC-G-C-G-T-G-GG---A-A-T-CT-G--C-C-CTT--GG-G----T-T-C-G-G-A---AT-AA-C--TC------------------G-C-C-…
>ICSZ4EG01A5UU1
G-A-T--G-A-A-C-G-C--T-A-G-C--G-G--G-A-G-G---C---C-T--AA-C--AC-A-T-G-C--A-A-G--C-C--GA-G-CG-G---------T-A----T-T--G---------------------------------T-T-T-C--------------------TTC-G---------------------------G--A--A-A---------------------------T-G----A--GA--G-------CG-C-G-G-C-GT-A--C--G-GG--T--G-C-G-G-A-AC-A-C-G-T-G-TG---CAA-C-CT-G--C-C-TTT--AT-C----T-G-G-G-G-G---AT-AG-C--CT------------------T-T-C-…
>ICSZ4EG02HYVOU
G-A-T--G-A-A-C-G-C--T-A-G-C--G-G--C-A-G-G---C---T-T--AA-C--AC-A-T-G-C--A-A-G--TCGAGGGGCAGCGA---------G-AT-------------------------------------------CAGTGC-----------------TTGCACTGATT------------------------GTCG------------------------------------------GC--G-------AC-C-G-G-C-GC-A--C--G-GG--T--G-C-G-T-A-AC-G-C-G-T-G-GG---A-A-T-CT-G--C-C-CTT--GG-G----T-T-C-G-G-A---AT-AA-C--TC------------------G-C-C-…
>ICSZ4EG01A4HUD
A-T-T--G-A-G-C-G-C--T-G-G-C--G-G--C-A-T-G---C---C-T--TA-C--AC-A-T-G-C--A-A-G--T-C--GA-A-CG-----------G-TAA--C-A--G-----------------------------------G-T-C--------------------TTC-G---------------------------G--A--T---------------------------G-C-T----G--AC--G-------AG-T-G-G-C-GG-A--C--G-GG--T--G-A-G-T-A-AT-A-C-A-T-C-GG---A-A-C-GT-G--C-C-CGA--TC-G----T-G-G-G-G-G---AT-AA-C--GA------------------G-G-C-…
>ICSZ4EG01A44NS
A-A-C--G-A-A-C-G-C--T-G-G-C--G-G--C-A-T-G---C---C-TA--A-C--AC-A-T-G-C--A-A-G--T-C--GA-A-CG-A---------G-A-----------------------------------------------C-C--------------------TTC-G---------------------------G--G------------------------------------------TC--T-------AG-T-G-G-C-GC-A--C--G-GG--T--G-C-G-T-A-AC-G-C-G-T-G-GG---A-A-T-CT-G--C-C-CTT--GG-G----T-T-C-G-G-A---AT-AA-C--TC------------------G-C-C-…
>ICSZ4EG01A1GHA
A-T-T--G-A-A-C-G-C--T-G-G-C--G-G--C-A-T-G---C---C-T--TA-C--AC-A-T-G-C--A-A-G--T-C--GA-A-CG-----------G-TA-----A--C---------------------------------G-G-G----------------------TCC-T---------------------------T--C--G-G-------------------------G-A-TACC-G--AC--G-------AG-T-G-G-C-GA-A--C--G-GG--T--G-A-G-T-A-AT-A-T-A-T-C-GG---A-A-C-GT-G--C-C-CAG--TA-G----T-G-G-G-G-G---AT-AA-C--TG------------------C-T-C-…
>ICSZ4EG01A17XZ
G-A-T--G-A-A-C-G-C--T-G-G-C--G-G--C-G-T-G---C---C-T--AA-C--AC-A-T-G-C--A-A-G--T-C--GA-A-C--G-----------G----A----G----------CCTTA-T-----------CA-G-CAGAAGCATCCAG--------------CTT-G------------C-CGGA---------AG-C--G-G-A-A--GAA--GAAA------------A-G----G--CT--T-------AG-T-G-G-C-GG-A--C--G-GG--T--G-A-G-T-A-AC-G-C-G-T-G-GG---TAA-C-CT-G--G-C-CCA--TA-C----A-G-G-G-G-G---AT-AA-C--AC------------------T-T-A-…
>ICSZ4EG01C4XJ9
G-A-T--G-A-A-C-G-C--T-G-G-C--G-G--C-A-T-G---C---C-T--AA-T--AC-A-T-G-C--A-A-G--T-C--G--A-------------------------------------------------------A--C-G-G-A------------------------T-----------------------------A--T----C-T-T--CGG--------------------A----T--AT--G-------AG-T-G-G-C-GA-A--C--G-GG--T--G-A-G-T-A-AC-A-C-G-T-A-GG---GAA-C-CT----G-C-CTG--CATG----A-G-C-G-G-G---AG-AA-C--TT------------------C-T-G-…
>ICSZ4EG01D43TX
A-A-C--G-A-A-C-G-C--T-G-G-C--G-G--C-A-T-G---C---C-T--AA-T--AC-A-T-G-C--A-A-G--T-C--GA-A-CG-A---------T-C-----------------------------------------------A-C--------------------TTC-G---------------------------G--T------------------------------------------GA--T-------AG-T-G-G-C-GC-A--C--G-GG--T--G-C-G-T-A-AC-G-C-G-T-G-GG---A-A-T-CT-G--C-C-CTT--GG-G----T-T-C-G-G-A---AT-AA-C--AT------------------C-T-G-…
>ICSZ4EG01A2V5R
A-A-C--G-A-A-C-G-C--T-G-G-C--G-G--C-A-T-G---C---C-T--AA-C--AC-A-T-G-C--A-A-G--T-C--GA-A-CG-A---------A-G-----------------------------------------------G-C--------------------TTC-G---------------------------G--C------------------------------------------CT--T-------AG-T-G-G-C-GC-A--C--G-GG--T--G-C-G-T-A-AC-G-C-G-T-G-GG---A-A-T-CT-G--C-C-CTT--AG-G----T-T-C-G-G-A---AT-AA-C--AG------------------C-T-G-…
>ICSZ4EG01DPSBK
A-A-C--G-A-A-C-G-C--T-G-G-C--G-G--C-A-G-G---C---T-T--AA-C--AC-A-T-G-C--A-A-G--T-C--GA-G-CG-G---------G-C-----------------------------------------------A-C--------------------TTC-G---------------------------G--T------------------------------------------GT--C-------AG-C-G-G-C-GG-A--C--G-GG--T--T-A-G-T-A-AC-G-C-G-T-G-GG---A-A-C-GT-G--C-C-CTT--CA-C----T-G-C-G-G-A---AT-AG-C--AT------------------T-G-G-…
>ICSZ4EG01D0GVI
A-T-T--G-A-A-C-G-C--T-G-G-C--G-G--C-A-T-G---C---C-T--TA-C--AC-A-T-G-C--A-A-G--T-C--GA-A-CG-----------G-TAA--C-A--G-----------------------------------G-T-C--------------------TTC-G---------------------------G--A--C---------------------------G-C-T----G--AC--G-------AG-T-G-G-C-GA-A--C--G-GG--T--G-A-G-T-A-AT-A-C-A-T-C-GG---A-A-C-GT-G--C-C-CAG--TC-G----T-G-G-G-G-G---AT-AA-C--TA------------------C-T-C-…
>ICSZ4EG01DK9IN
A-T-T--G-A-A-C-G-C--T-G-G-C--G-G--A-A-T-G---C---T-T--TA-C--AC-A-T-G-C--A-A-G--T-C--GA-G-CG-----------G-CAG--C-G--C-----------------------------------G-G-G--------------------GCA-A---------------------------C--C--T---------------------------G-G-C----G--GC--G-------AG-C-G-G-C-GA-A--C--G-GG--T--G-A-G-T-A-AT-A-C-A-T-C-GG---A-A-C-GT-G--C-C-CAG--AC-G----T-G-G-G-G-G---AT-AA-C--TA------------------C-T-C-…
>ICSZ4EG01CWT8Y
A-G-C--G-A-A-C-G-C--T-G-G-C--G-G--C-A-G-G---C---T-T--AA-C--AC-A-T-G-C--A-A-G--T-C--GA-A-CG-C---------T-C---------------------------------------------G-T-C--------------------TTC-G---------------------------G--A--C---------------------------------------GG--G-------AG-T-G-G-C-AG-A--C--G-GG--T--G-A-G-T-A-AC-A-C-G-T-G-GG---A-A-C-GT-A--C-C-CTT--TG-G----T-T-C-G-G-A---AT-AA-C--GC------------------A-G-G-…
>ICSZ4EG01EQP60
A-A-C--G-A-A-C-G-C--T-G-G-C--G-G--C-A-T-G---C---C-T--AA-C--AC-A-T-G-C--A-A-G--T-C--GA-A-CG-A---------G-G---------------------------------------------C-C-C--------------------TTC-G---------------------------G--G--G---------------------------------------TT--T-------AG-T-G-G-C-GC-A--C--G-GG--T--G-C-G-T-A-AC-G-C-G-T-G-GG---A-A-T-CT-G--C-C-CTT--TG-G----T-T-C-G-G-A---AT-AA-C--AG------------------C-T-G-…
>ICSZ4EG01C13HQ
A-A-C--G-A-A-C-G-C--T-G-G-C--G-G--C-A-T-G---C---C-T--AA-T--AC-A-T-G-C--A-A-G--T-C--GA-A-CG-A---------G-A-----------------------------------------------T-C--------------------TTC-G---------------------------G--A------------------------------------------TC--T-------AG-T-G-G-C-GC-A--C--G-GG--T--G-C-G-T-A-AC-G-C-G-T-G-GG---A-A-T-CT-G--C-C-CTT--GG-G----T-T-C-G-G-A---AT-AA-C--AT------------------C-G-G-…
>ICSZ4EG01CC4L6
A-A-C--G-A-A-C-G-C--T-G-G-C--G-G--C-A-T-G---C---C-T--AA-C--AC-A-T-G-C--A-A-G--T-C--GA-A-CG-A---------G-A-----------------------------------------------C-C--------------------TTC-G---------------------------G--G------------------------------------------TC--T-------AG-T-G-G-C-GC-A--C--G-GG--T--G-C-G-T-A-AC-G-C-G-T-G-GG---A-A-T-CT-G--C-C-CTT--GG-G----T-T-C-G-G-A---AT-AA-C--AT------------------C-T-G-…
>ICSZ4EG01BDARG
A-A-C--G-A-A-C-G-C--T-G-G-C--G-G--C-A-T-G---C---C-T--AA-C--AC-A-T-G-C--A-A-G--T-C--GA-A-CG-A---------A-G-----------------------------------------------G-C--------------------TTC-G---------------------------G--C------------------------------------------CT--T-------AG-T-G-G-C-GC-A--C--G-GG--T--G-C-G-T-A-AC-G-C-G-T-G-GG---A-A-T-CT-G--C-C-CTT--GG-G----T-T-C-G-G-A---AT-AA-C--TC------------------G-C-C-…
>ICSZ4EG01B8RLZ
G-A-C--G-A-A-C-G-C--T-G-G-C--G-G--C-A-T-G---C---C-T--AA-T--AC-A-T-G-C--A-A-G--T-C--GA-A-CG-C---------T-G----A-A--G----------------------------CA-C-T-C-T-G--------------------CTT-G---------------------------C--A--G-A-G-T--G--------------------C-G----G--AT--G-------AG-T-G-G-C-GA-A--C--G-GG--T--G-A-G-T-A-AC-A-C-G-T-G-GG---AAA-T-CT-G--C-C-TAT--AA-G----T-G-G-G-G-G---AT-AA-C--AT------------------T-C-G-…
>ICSZ4EG01CUT6T
A-A-C--G-A-A-C-G-C--T-G-G-C--G-G--C-A-T-G---C---C-T--AA-C--AC-A-T-G-C--A-A-G--T-C--GA-A-CG-A---------G-A-----------------------------------------------C-C--------------------TTC-G---------------------------G--G------------------------------------------TC--T-------AG-T-G-G-C-GC-A--C--G-GG--T--G-C-G-T-A-AC-G-C-G-T-G-GG---A-A-T-CT-G--C-C-CTT--GG-G----T-T-C-G-G-A---AT-AA-C--AT------------------C-G-G-…
>ICSZ4EG01DZHQJ
G-A-T--G-A-A-C-G-C--T-A-G-C--G-A--C-A-G-G---C---T-T--AA-C--AC-A-T-G-C--A-A-G--T-C--GA-G-GG-----------G-CAG--C-G--G----------------G-----------GG-C-G-G-A-AG-------------------CTT-G----------------C----------T--T--T-C-G-C--CC-----------------G-C-C----G--GC--G-------AC-C-G-G-C-GC-A--C--G-GG--T--G-A-G-T-A-AC-A-C-G-T-A-TG---CAA-C-CT-G--G-C-CGC--CA-C----A-G-G-G-G-G---AT-AA-C--CC------------------G-C-G-…
>ICSZ4EG01DV47D
G-A-C--G-A-A-C-G-C--T-G-G-C--G-G--C-G-T-G---C---C-T--AA-T--AC-A-T-G-C--A-A-G--T-C--GA-G-CG-G-----------G--------------------------------------TT-T-G-T-C-C--------------------CTT-----------------------------C-----G-G-G-G--AC-------------------A-A----G--C---T-------AG-C-G-G-C-GG-A--C--G-GG--T--G-A-G-T-A-AC-A-C-G-T-A-GG---CAA-C-CT-G--C-C-CAT--GG-G----A-C-C-G-G-G---AT-AA-C---G------------------T-CGG-…
>ICSZ4EG01CTPTQ
G-A-T--G-A-A-C-G-C--T-A-G-C--G-G--G-A-G-G---C---C-T--AA-C--AC-A-T-G-C--A-A-G--C-C--GA-G-CG-G---------T-A----T-T--G---------------------------------T-T-T-C--------------------TTC-G---------------------------G--A--A-A---------------------------T-G----A--GA--G-------AG-C-G-G-C-GT-A--C--G-GG--T--G-C-G-G-A-AC-A-C-G-T-G-TG---CAA-C-CT-G--C-C-TTT--AT-C----T-G-G-G-G-G---AT-AG-C--CT------------------T-T-C-…
>ICSZ4EG01C8Q8B
G-A-T--G-A-A-C-G-C--T-A-G-C--G-G--G-A-G-G---C---C-T--AA-C--AC-A-T-G-C--A-A-G--C-C--GA-G-CG-G---------T-A----T-T--T---------------------------------G-T-T-C--------------------TTC-G---------------------------G--A--A-C---------------------------A-G----A--GA--G-------AG-C-G-G-C-GC-A--C--G-GG--T--G-C-G-G-A-AC-A-C-G-T-G-TG---CAA-C-CT-G--C-C-TTT--AT-C----T-G-G-G-G-G---AT-AG-C--CT------------------T-T-C-…
>ICSZ4EG01BA0PJ
A-T-T--G-A-A-C-A-C--T-G-G-C--G-G--C-A-T-G---C---C-T--TA-C--AC-A-T-G-C--A-A-G--T-C--GA-A-CG-----------G-TAA--C-A--G-----------------------------------G-T-C--------------------TTC-G---------------------------G--A--T---------------------------G-C-T----G--AC--G-------AG-T-G-G-C-GA-A--C--G-GG--T--G-A-G-T-A-AT-A-C-A-T-C-GG---A-A-C-GT-G--C-C-CGA--TC-G----T-G-G-G-G-G---AT-AA-C--GA------------------A-G-C-…
>ICSZ4EG01EPNFS
A-A-C--G-A-A-C-G-C--T-G-G-C--G-G--C-A-T-G---C---C-T--AA-C--AC-A-T-G-C--A-A-G--T-C--GA-A-CG-A---------G-A-----------------------------------------------C-C--------------------TTC-G---------------------------G--G------------------------------------------TC--T-------AG-T-G-G-C-GC-A--C--G-TG--T--G-C-G-T-A-AC-G-C-G-T-G-GG---A-A-T-CT-G--C-C-CTT--GG-G----T-T-C-G-G-A---AT-AA-C--TC------------------G-C-C-…
>ICSZ4EG01DMAEM
G-A-C--G-A-A-C-G-C--T-G-G-C--G-G--C-G-T-G---C---C-T--AA-T--AC-A-T-G-C--A-A-G--T-C--GA-A-CG-C---------T-T----T-T--T-----------CTTT-C-----------AC-C-G-G-A-G--------------------CTT-G---------------------------C--T--C-C-A-C--CGA--AAG-------------A-A----A--AA--G-------AG-T-G-G-C-GA-A--C--G-GG--T--G-A-G-T-A-AC-A-C-G-T-G-GG---TAA-T-CT-G--C-C-CAT--CA-G----A-A-G-G-G-G---AT-AA-C--AC------------------T-T-G-…
>ICSZ4EG01BNE28
A-A-C--G-A-A-C-G-C--T-G-G-C--G-G--C-A-T-G---C---C-T--AA-C--AC-A-T-G-C--A-A-G--T-C--GA-A-CG-A---------G-A-----------------------------------------------C-C--------------------TTC-G---------------------------G--G------------------------------------------TC--T-------AG-T-G-G-C-GC-A--C--G-GG--T--G-C-G-T-A-AC-G-C-G-T-G-GG---A-A-T-CT-G--C-C-CTT--AG-G----T-T-C-G-G-A---AT-AA-C--AG------------------C-T-G-…
>ICSZ4EG01AWZ08
A-T-T--G-A-A-C-G-C--T-G-G-C--G-G--C-A-T-G---C---C-T--TA-C--AC-A-T-G-C--A-A-G--T-C--GA-A-CG-----------G-TAA--C-G--G-------------------------------------GTCC-------------------TTCGGGA----------------------------T------------------------------G-C-C----G--AC--G-------AG-T-G-G-C-GA-A--C--G-GG--T--G-A-G-T-A-AT-A-T-A-T-C-GG---A-A-C-GT-G--C-C-CAG--TA-G----T-G-G-G-G-G---AT-AA-C--TA------------------C-T-C-…
>ICSZ4EG01CD1GS
A-T-T--G-A-A-C-G-C--T-G-G-C--G-G--C-A-T-G---C---C-T--TA-C--AC-A-T-G-C--A-A-G--T-C--GA-A-CG-----------G-TAA--C-G--G-----------------------------------G-TCC--------------------TTCGG---------------------------G--A--T---------------------------G-C-C----G--AC--G-------AG-T-G-G-C-GA-A--C--G-GG--T--G-A-G-T-A-AT-A-T-A-T-C-GG---A-A-C-GT-G--C-C-CGA--TC-G----T-G-G-G-G-G---AT-AA-C--GA------------------A-G-C-…
>ICSZ4EG01DR5NY
G-A-C--G-A-A-C-G-C--T-G-G-C--G-G--C-A-T-G---C---C-T--AA-C--AC-A-T-G-C--A-A-G--T-C--GG-A-CG-A---------G-A-----------------------------------------------C-C--------------------TTC-G---------------------------G--G------------------------------------------TC--T-------AG-T-G-G-C-GC-A--C--G-GG--T--G-C-G-T-A-AC-G-T-G-T-G-GG---A-A-T-CT-G--C-C-CTT--GG-G----T-T-C-G-G-A---AT-AA-C--TC------------------G-C-C-…
>ICSZ4EG01DF2HN
A-T-T--G-A-A-C-G-C--T-G-G-C--G-G--C-A-T-G---C---C-T--TA-C--AC-A-T-G-C--A-A-G--T-C--GA-A-CG-----------G-TAA--C-A--G-----------------------------------G-T-C--------------------TTC-G---------------------------G--A--T---------------------------G-C-T----G--AC--G-------AG-T-G-G-C-GA-A--C--G-GG--T--G-A-G-T-A-AT-A-C-A-T-C-GG---A-A-C-GT-G--C-C-CGA--TC-G----T-G-G-G-G-G---AT-AA-C--GA------------------G-G-C-…
>ICSZ4EG01DBFPC
A-A-C--G-A-A-C-G-C--T-G-G-C--G-G--C-A-T-G---C---C-T--AA-T--AC-A-T-G-C--A-A-G--T-C--GA-A-CG-A---------T-C-----------------------------------------------A-C--------------------TTC-G---------------------------G--T------------------------------------------GA--T-------AG-T-G-G-C-GC-A--C--G-GG--T--G-C-G-T-A-AC-G-C-G-T-G-GG---A-A-T-CT-G--C-C-CTT--GG-G----T-T-C-G-G-A---AT-AA-C--TC------------------G-C-C-…
>ICSZ4EG01D36KG
A-T-T--G-A-A-C-G-C--T-G-G-C--G-G--C-A-T-G---C---C-T--TA-C--AC-A-T-G-C--A-A-G--T-C--GA-A-CG-----------G-TAA--C-A--G-----------------------------------G-T-C--------------------TTC-G---------------------------G--A--T---------------------------G-C-T----G--AC--G-------AG-T-G-G-C-GA-A--C--G-GG--T--G-A-G-T-A-AT-A-C-A-T-C-GG---A-A-C-GT-G--C-C-CAG---C-G----T-G-G-G-G-G---AT-AA-C--GA--------------------G-C-…
>ICSZ4EG01BE3IV
A-A-C--G-A-A-C-G-C--T-G-G-C--G-G--C-A-T-G---C---C-T--AA-C--AC-A-T-G-C--A-A-G--T-C--GA-A-CG-A---------G-A-----------------------------------------------C-C--------------------TTC-G---------------------------G--T------------------------------------------GA--T-------AG-T-G-G-C-GC-A--C--G-GG--T--G-C-G-T-A-AC-G-C-G-T-G-GG---A-A-T-CT-G--C-C-CTT--GG-G----T-T-C-G-G-A---AT-AA-C--AT------------------C-T-G-…
>ICSZ4EG01B2NIG
A-A-C--G-A-A-C-G-C--T-G-G-C--G-G--C-A-T-G---C---C-T--AA-C--AC-A-T-G-C--A-A-G--T-C--GA-A-CG-AG--------G-C-----------------------------------------------C-C--------------------TTCGG---------------------------G--G------------------------------------------TT--T-------AG-T-G-G-C-GC-A--C--G-GG--T--G-C-G-T-A-AC-G-C-G-T-G-GG---A-A-T-CT-G--C-C-CTT--GG-G----T-T-C-G-G-A---AT-AA-C--TC------------------G-C-C-…
>ICSZ4EG01EIYMB
A---C--G-A-A-C-G-C--T-G-G-C--G-G--C-A-T-G---C---C-T--TA-C--AC-A-T-G-C--A-A-G--T-C--GA-A-CG-----------G-TAA--C-A--G-----------------------------------G-T-C--------------------TTC-G---------------------------G--A--T---------------------------G-C-T----G--AC--G-------AG-T-G-G-C-GA-A--C--G-GG--T--G-A-G-T-A-AT-A-C-A-T-C-GG---A-A-C-GT-G--C-C-CGA--TC-G----T-G-G-G-G-G---AT-AA-C--GA------------------G-G-C-…
>ICSZ4EG01BTJUR
A-A-C--G-A-A-C-G-C--T-G-G-C--G-G--C-A-T-G---C---C-T--AA-C--AC-A-T-G-C--A-A-G--T-C--GA-A-CG-A---------A-G-----------------------------------------------G-C--------------------TTC-G---------------------------G--C------------------------------------------CT--T-------AG-T-G-G-C-GC-A--C--G-GG--T--G-C-G-T-A-AC-G-C-G-T-G-GG---A-A-T-CT-G--C-C-CTT--AG-G----T-T-C-G-G-A---AT-AA-C--AGC-----------------T-G---…
>ICSZ4EG01BHN8X
A-T-T--G-A-A-C-G-C--T-G-G-C--G-G--C-A-T-G---C---C-T--TA-C--AC-A-T-G-C--A-A-G--T-C--GA-G-CG-G---------G-C---------------------------------------------G-T-A--------------------GCA-A---------------------------T--A--C---------------------------------------GT--C-------AG-C-G-G-C-AG-A--C--G-GG--T--G-A-G-T-A-AC-G-C-G-T-G-GG---A-A-C-GT-A--C-C-TTT--TG-G----T-T-C-G-G-A---AC-AA-C--AC------------------A-G-G-…
>ICSZ4EG01B65GN
A-T-T--G-A-A-C-G-C--T-G-G-C--G-G--C-A-G-G---C---T-T--AA-C--AC-A-T-G-C--A-A-G--T-C--GA-A-CG-----------A-TGA--A-A--C-------------------------------T-C-T-A-G--------------------CTT-G---------------------------C--T--A-G-A-------------------------G-AA---G--AT--T-------AG-T-G-G-C-GG-A--C--G-GG--T--G-A-G-T-A-AC-A-T-T-T-A-GG---A-A-T-CT-G--C-C-TAG--TA-G----T-G-G-G-G-G---AT-AG-C--TC------------------G-G-G-…
>ICSZ4EG01BTKO5
A-A-C--G-A-A-C-G-C--T-G-G-C--G-G--C-A-T-G---C---C-T--AA-C--AC-A-T-G-C--A-A-G--T-C--GA-A-CG-A---------G-A-----------------------------------------------C-C--------------------TTC-----------------------------G--G--G---------------------------------------TC--T-------AG-T-G-G-C-GC-A--C--G-GG--T--G-C-G-T-A-AC-G-C-G-T-G-GG---A-A-T-CT-G--C-C-CTT--GG-G----T-T-C-G-G-A---AT-AA-CT-CG------------------C---C-…
>ICSZ4EG01BTUXN
A-T-T--G-A-A-C-G-C--T-G-G-C--G-G--A-A-T-G---C---T-T--TA-C--AC-A-T-G-C--A-A-G--T-C--GA-G-CG-----------G-CAG--CGC--G-------------------------------------G-G--------------------GCA-A---------------------------C--C--T---------------------------G-G-C----G--GC--G-------AG-C-G-G-C-GA-A--C--G-GG--T--G-A-G-T-A-AT-A-C-A-T-C-GG---A-A-C-GT-G--C-C-CGA--TC-G----T-G-G-G-G-G---AT-AA-C--GA------------------G-G-C-…
>ICSZ4EG01ER395
A-A-C--G-A-A-C-G-C--T-G-G-C--G-G--C-A-T-G---C---C-T--AA-C--AC-G-T-G-C--A-A-G--T-C--GA-A-CG-----------G-TA-----A--C---------------------------------G-G-G----------------------TCC-T---------------------------T--C--G-G-------------------------G-A-T----GCCGAC-G-------AG-T-G-G-C-GA-A--C--G-GG--T--G-A-G-T-A-AT-A-T-A-T-C-GG---A-A-C-GT-G--C-C-CAG--TA-G----T-G-G-G-G-G---AT-AA-C--TG------------------C-T-C-…
>ICSZ4EG01EQY2X
A-T-T--G-A-A-C-G-C--T-G-G-C--G-G--C-A-T-G---C---C-T--TA-C--GC-A-T-G-C--A-A-G--T-C--GA-A-CG-----------G-TA-----A--C-----------------------------------G-G-A--------------------TCC-T---------------------------T--C--G-G-------------------------G-A-TACC-G--AC--G-------AG-T-G-G-C-GA-A--C--G-GG--T--G-A-G-T-A-AT-A-T-A-T-C-GG---A-A-C-GT-G--C-C-CAG--TA-G----T-G-G-G-G-G---AT-AA-C--TG------------------C-T-C-…
>ICSZ4EG01EN23A
A-T-T--G-A-A-C-G-C--T-G-G-C--G-G--C-A-T-G---C---C-T--TA-C--AC-A-T-G-C--A-A-G--T-C--GA-A-CG-----------G-TA-----A--C---------------------------------G-G-G----------------------TCC-T---------------------------T--C--G-G-------------------------G-A-T----GCCGAC-G-------AG-T-G-G-C-GA-A--C--G-GG--T--G-A-G-T-A-AT-A-T-A-T-C-GG---A-A-C-GT-G--C-C-CAG--TA-G----T-G-G-G-G-G---AT-AA-C--TG------------------C-T-C-…
>ICSZ4EG01D7KZ1
T---T--G-A-A-C-G-C--T-G-G-C--G-G--C-A-T-G---C---C-T--TA-C--AC-A-T-G-C--A-A-G--T-C--GA-A-CG-----------G-TAA--C-A--G-----------------------------------G-T-C--------------------TTC-G---------------------------G--A--T---------------------------G-C-T----G--AC--G-------AG-T-G-G-C-GA-A--C--G-GG--T--G-A-G-T-A-AT-A-C-A-T-C-GG---A-A-C-GT-G--C-C-CGA--TC-G----T-G-G-G-G-G---AT-AA-C--GA------------------G-G-C-…
>ICSZ4EG01EJ38T
A-T-T--G-A-A-C-G-C--T-G-G-C--G-G--C-A-T-G---C---C-T--TA-C--AC-A-T-G-C--A-A-G--T-C--GG-A-CG-----------G-TA-----A--C---------------------------------G-G-G----------------------TCC-T---------------------------T--C--G-G-------------------------G-A-T----GCCAAC-G-------AG-T-G-G-C-GA-A--C--G-GG--T--G-A-G-T-A-AT-A-T-A-T-C-GG---A-A-C-GT-G--C-C-CAG--TA-G----T-G-G-G-G-G---AT-AA-C--TG------------------C-T-C-…
>ICSZ4EG01EIQPI
G-A-T--G-A-A-C-G-C--T-G-G-C--G-G--C-A-T-G---C---C-T--AA-T--AC-A-T-G-C--A-A-G--T-C--GA-A-CG-------------G---------------------------------------A-----T-A------------------------T-----------------------------C--T--T---C-----GG------------------A-T----A---T--G-------AG-T-G-G-C-GA-A--C--G-GG--T--G-A-G-T-A-AC-A-C-G-T-A-GG---GAA-C-CT-G--C-C-TGC--AT-G----A-G-C-G-G-G---AG-AA-C--TT------------------C-T-G-…
>ICSZ4EG01EGL6D
A-A-C--G-A-A-C-G-C--T-G-G-C--G-G--C-A-T-G---C---C-T--AA-C--AC-A-T-G-C--A-A-G--T-C--GA-A-CG-A---------G-A-----------------------------------------------C-C--------------------TTC-G---------------------------G--G------------------------------------------TC--T-------AG-T-G-G-C-GC-A--C--G-GG--T--G-C-G-T-A-AC-G-C-G-T-G-GG---A-A-T-CT-G--C-C-CTT--GG-G----T-T-C-G-G-A---AT-AA-C--TC------------------G-C-C-…
>ICSZ4EG01EF3OP
G-T-T--G-A-A-C-G-C--T-G-G-C--G-G--C-A-T-G---C---C-T--TA-C--AC-A-T-G-C--A-A-G--T-C--GA-A-CG-----------G-TA-----A--C---------------------------------G-G-G----------------------TCC-T---------------------------T--C--G-G-------------------------G-A-T----GCCGAC-G-------AG-T-G-G-C-GA-A--C--G-GG--T--G-A-G-T-A-AT-A-T-A-T-C-GG---A-A-C-GT-G--C-C-CAG--TA-G----T-G-G-G-G-G---AT-AA-C--TG------------------C-T-C-…
>ICSZ4EG01BGRRM
A-T-T--G-A-A-C-G-C--T-G-G-C--G-G--C-A-T-G---C---C-T--TA-C--AC-A-T-G-C--A-A-G--T-C--GA-A-CG-----------G-TAA--C-A--G-----------------------------------G-T-C--------------------TTC-G---------------------------G--A--C---------------------------G-C-T----G--AC--G-------AG-T-G-G-C-GA-A--C--G-GG--T--G-A-G-T-A-AT-A-C-A-T-C-GG---A-A-C-GT-G--C-C-CAG--TC-G----T-G-G-G-G-G---AT-AA-C--TA------------------C-T-C-…
>ICSZ4EG01DYKAC
A-A-C--G-A-A-C-G-C--T-G-G-C--G-G--C-A-T-G---C---C-T--AA-T--AC-A-T-G-C--A-A-G--T-C--GA-A-CG-A---------G-A-----------------------------------------------T-C--------------------TTC-G---------------------------G--A------------------------------------------TC--T-------AG-T-G-G-C-GC-A--C--G-GG--T--G-C-G-T-A-AC-G-C-G-T-G-GG---A-A-T-CT-G--C-C-CTT--GG-G----T-T-C-G-G-A---AT-AA-C--TC------------------G-C-C-…
>ICSZ4EG01DWUMX
A-T-T--G-A-A-C-G-C--T-G-G-C--G-G--C-A-T-G---C---C-T--TA-C--AC-A-T-G-C--A-A-G--T-C--GA-A-CG-----------G-TAA--C-A--G-----------------------------------G-T-C--------------------TTC-G---------------------------G--A--T---------------------------G-C-T----G--AC--G-------AG-T-G-G-C-GA-A--C--G-GG--T--G-A-G-T-A-AT-A-C-A-T-C-GG---A-A-C-GT-G--C-C-C-G-ATC-G----T-G-G-G-G-G---AT-AA-C--GA------------------G-G-C-…
>ICSZ4EG01DW84S
A-T-T--G-A-A-C-G-C--C-G-G-C--G-G--C-A-T-G---C---C-T--TA-C--AC-A-T-G-C--A-A-G--T-C--GA-A-CG-----------G-TAA--C-A--G-----------------------------------G-T-C--------------------TTC-G---------------------------G--A--T---------------------------G-C-T----G--AC--G-------AG-T-G-G-C-GA-A--C--G-GG--C--G-A-G-T-A-AT-A-C-A-T-C-GG---A-A-C-GT-G--C-C-CGA--TC-G----T-G-G-G-G-G---AT-AA-C--GA------------------A-G-C-…
>ICSZ4EG01DVK6F
A-G-T--G-A-A-C-G-C--T-G-G-C--G-G--T-A-G-G---C---C-T--AA-C--AC-A-T-G-C--A-A-G--T-C--GA-A-CG-----------G-CAG--C-A--C----------------A-----------G--G-A-G-A-G--------------------CTT-G---------------------------C--T--C-T-C----TG-----------------G-G-T----G--GC--G-------AG-T-G-G-C-GG-A--C--G-GG--T--G-A-G-G-A-AT-A-C-A-T-C-GG---A-A-T-CT-A--C---TTT--TC-G----T-G-G-G-G-G--AGT-AA-C--GT------------------A-G-G-…
>ICSZ4EG01DV1X3
A-A-C--G-A-A-C-G-C--T-G-G-C--G-G--C-A-T-G---C---C-T--TA-C--AC-A-T-G-C--A-A-G--T-C--GA-A-CG-----------G-TA-----A--C---------------------------------G-G-G----------------------TCC-T---------------------------T--C--G-G-------------------------G-A-T----GCCGAC-G-------AG-T-G-G-C-GA-A--C--G-GG--T--G-A-G-T-A-AT-A-T-A-T-C-GG---A-A-C-GC-G--C-C-CAG--TA-G----T-G-G-G-G-G---AT-AA-C--TG------------------C-T-C-…
>ICSZ4EG01DTW9C
G-A-T--G-A-A-C-G-C--T-G-G-C--G-G--C-A-T-G---C---C-T--AA-C--AC-A-T-G-C--A-A-G--T-C--GA-A-CG-A---------G-A-----------------------------------------------C-C--------------------TTC-G---------------------------G--G------------------------------------------TC--T-------AG-T-G-G-C-GC-A--C--G-GG--T--G-C-G-T-A-AC-G-C-G-T-G-GG---A-A-T-CT-G--C-C-CTT--GG-G----T-T-C-G-G-A---AC-AA-C--TC------------------G-C-C-…
>ICSZ4EG02JYBAO
A-T-T--G-A-A-C-G-C--T-G-G-C--G-G--C-A-T-G---C---C-T--TA-C--AC-A-T-G-C--A-A-G--T-C--GA-A-CG-----------G-TAA--C-A------------------------------------G-G-T-C--------------------TTC-G---------------------------G--A--C---------------------------G-C-T----G--AC--G-------AG-T-G-G-C-GA-A--C--G-GG--T--G-A-G-T-A-AT-A-C-A-T-C-GG---A-A-C-GT-G--C-C-CAG--TA-G----T-G-G-G-G-G---AT-AA-C--TG------------------C-T-C-…
>ICSZ4EG01DPQGD
A-T-T--G-A-A-C-G-C--T-G-G-C--G-G--C-A-T-G---C---C-T--TA-C--AC-A-T-G-C--A-A-G--T-C--GA-A-CG-----------G-TAA--C-G--------------------------------------G-G-T--------------------CCT-T---------------------------CGGGA-T---------------------------G-C-C----G--AC--G-------AG-T-G-G-C-GA-A--C--G-GG--T--G-A-G-T-A-AT-A-T-A-T-C-GG---A-A-C-GT-G--C-C-CAG--TA-G----T-G-G-G-G-G---AT-AA-C--TG------------------C-T-C-…
>ICSZ4EG01DORA7
A-T-T--G-A-A-C-G-C--T-G-G-C--G-G--C-A-T-G---C---C-T--TA-C--AC-A-T-G-C--A-A-G--T-C--GA-A-CG-----------G-TGA--C-A--G-----------------------------------G-T-C--------------------TTC-G---------------------------G--A--T---------------------------G-C-T----G--AC--G-------AG-T-G-G-C-GA-A--C--G-GG--T--G-G-G-T-A-AT-A-C-A-T-C-GG---A-A-C-GT-G--C-C-CGA--TC-G----T-G-G-G-G-G---AT-AA-C--GA------------------A-G-C-…
>ICSZ4EG01DM1B7
G-A-T--G-A-A-C-G-C--T-G-G-C--G-G--C-A-T-G---C---C-T--AA-T--AC-A-T-G-C--A-A-G--T-C--GA-A-CG-------------G---------------------------------------A-----T-A------------------------T-----------------------------C--T--T---C-----GG------------------A-T----A---T--G-------AG-T-G-G-C-GA-A--C--G-GG--T--G-A-G-T-A-AC-A-C-G-T-A-GG---GAA-C-CT-G--C-C-TGC--AT-G----A-G-C-G-G-G---AG-AA-C--TT------------------C-T-G-…
>ICSZ4EG01DH2BD
A-T-T--G-A-A-C-G-C--T-G-G-C--G-G--C-A-T-G---C---C-T--TA-C--AC-A-T-G-C--A-A-G--T-C--GA-A-CG-----------G-TAA--C-A--G-----------------------------------G-T-C--------------------TTC-G---------------------------G--A--T---------------------------G-C-T----G--AC--G-------AG-T-G-G-C-GA-A--C--G-GG--T--G-A-G-T-A-AT-A-C-A-T-C-GG---A-A-C-GT-G--C-C-CAG--GC-G----T-G-G-G-G-G---AT-AA-C--GA------------------G-G-C-…
>ICSZ4EG01D7RIL
A-A-C--G-A-A-C-G-C--T-G-G-C--G-G--C-A-T-G---C---C-T--AA-C--AC-A-T-G-C--A-A-G--T-T--GA-A-CG-A---------G-A-----------------------------------------------C-C--------------------TTC-G---------------------------G--G------------------------------------------TC--T-------AG-T-G-G-C-GC-A--C--G-GG--T--G-C-G-T-A-AC-G-C-G-T-G-GG---A-A-T-CT-G--C-C-CTT--GG-G----T-T-C-G-G-A---AT-AA-C--TC------------------G-C-CG…
>ICSZ4EG01D77CB
A-T-T--G-A-A-T-G-C--T-G-G-C--G-G--C-A-T-G---C---C-T--TA-C--AC-A-T-G-C--A-A-G--T-C--GA-A-CG-----------G-TA-----A--C---------------------------------G-G-G----------------------TCC-T---------------------------T--C--G-G-------------------------G-A-T----GCCGAC-G-------AG-T-G-G-C-GA-A--C--G-GG--T--G-A-G-T-A-AT-A-T-A-T-C-GG---A-A-C-GT-G--C-C-CAG--TA-G----T-G-G-G-G-G---AT-AA-C--TG------------------C-T-C-…
>ICSZ4EG01D1Y8R
A-T-T--G-A-A-C-G-C--T-G-G-C--G-G--C-A-T-G---C---C-T--TA-C--AC-A-T-G-C--A-A-G--T-C--GA-A-CG-----------G-TAA--C-A--G-----------------------------------G-T-C--------------------TTC-G---------------------------G--A--C---------------------------G-C-T----G--AC--G-------AG-T-G-G-C-GA-A--C--G-GG--T--G-A-G-T-A-AT-A-C-A-T-C-GG---A-A-C-GT-G--C-C-CAG--TC-G----T-G-G-G-G-G---AT-GA-C--TA------------------C-T-C-…
>ICSZ4EG01D0I2A
A-A-C--G-A-A-C-G-C--T-G-G-T--G-G--C-A-T-G---C---C-T--AA-C--AC-A-T-G-C--A-A-G--T-C--GA-A-CG-AG--------G-C-----------------------------------------------C-C--------------------TTCGG---------------------------G--G------------------------------------------TT--T-------AG-T-G-G-C-GC-A--C--G-GG--C--G-C-G-T-A-AC-G-C-G-T-G-GG---A-A-T-CT-G--C-C-CTT--TG-G----T-T-C-G-G-A---AT-AA-C--AG------------------C-T-G-…
>ICSZ4EG02F82QV
G-A-T--G-A-A-C-G-C--T-G-G-C--G-G--C-A-T-G---C---T-T--AA-C--AC-A-T-G-C--A-A-G--T-C--GG-A-CG-G---------G-A-----------------------------------------------A-G-------------------TGGT-G---------------------------T--T------------------------------------------TC--C-------AG-T-G-G-C-GG-A--C--G-GG--T--G-A-G-T-A-AC-G-C-G-T-A-AG---A-A-C-CT-G--C-C-CTT--GG-G----T-T-C-G-G-A---AT-AA-C--TC------------------G-C-C-…
>ICSZ4EG01CY2GW
A-G-C--G-A-A-C-G-C--T-G-G-C--G-G--C-G-G-G---C---T-T--AA-C--AC-A-T-G-C--A-A-G--T-C--GA-G-CG-G---------G-C---------------------------------------------A-T-A--------------------GCA-A---------------------------T--A--T---------------------------------------GT--C-------AG-C-G-G-C-AG-A--C--G-GG--T--G-A-G-T-A-AC-G-C-G-T-G-GG---G-A-C-GT-A--C-C-TTT--TG-G----T-T-C-G-G-A---AC-AA-C--TG------------------A-G-G-…
>ICSZ4EG01CXKR1
A-T-T--G-A-A-C-G-C--T-G-G-C--G-G--C-A-T-G---C---C-T--TA-C--AC-A-T-G-C--A-A-G--T-C--GA-A-CG-----------G-TA-----A--C---------------------------------G-G-G----------------------TCC-T---------------------------T--C--G-G-------------------------G-A-T----GCCGAC-G-------AG-T-G-G-C-GA-A--C--G-GG--T--G-A-G-T-A-AT-A-T-A-T-C-GG---A-A-C-GT-G--C-C-CAG--TA-G----T-G-G-G-G-G--AGT-AA-C--TG------------------C-T-C-…
>ICSZ4EG01CTCMM
A-A-C--G-A-A-C-G-C--T-G-G-C--G-G--C-A-T-G---C---C-T--AA-C--AC-A-T-G-C--A-A-G--T-C--GA-G-CG-G---------G-C---------------------------------------------A-C-T--------------------TCG-G---------------------------T---------------------------------------------GT--C-------AG-C-G-G-CG-G-A--C--G-GG--T--T-A-G-T-A-AC-G-C-G-T-G-GG---A-A-C-GT-G--C-C-CTT--CA-C----T-G-C-G-G-A---AT-AG-C--AT------------------T-G-G-…
>ICSZ4EG01CSPAX
A-T-T--G-A-A-C-G-C--T-G-G-C--G-G--C-A-T-G---C---C-T--TA-C--GC-A-T-G-C--A-A-G--T-C--GA-A-CG-----------G-TA-----A--C---------------------------------G-G-G----------------------TCC-T---------------------------T--C--G-G-------------------------G-A-T----GCCGAC-G-------AG-T-G-G-C-GA-A--C--G-GG--T--G-A-G-T-A-AT-A-T-A-T-C-GG---A-A-C-GT-G--C-C-CAG--TA-G----T-G-G-G-G-G--ACG-AA-C--TG------------------C-T-C-…
>ICSZ4EG01CNXJ0
A-A-C--G-A-A-C-G-C--T-G-G-C--G-G--C-A-T-G---C---C-T--AA-C--AC-A-T-G-C--A-A-G--T-C--AG-A-CG-A---------G-A-----------------------------------------------C-C--------------------TTC-G---------------------------G--G------------------------------------------TC--T-------AG-T-G-G-C-GC-A--C--G-GG--T--G-C-G-T-A-AC-G-C-G-T-G-GG---A-A-C-CT-G--C-C-CTT--GG-G----T-T-C-G-G-A---AT-AA-C--TC------------------G-C-C-…
>ICSZ4EG01CNSEE
A-T-T--GTA-A-C-GAC--T-G-G-C--G-G--CGA-T-G---C---C-T--TACCT-AC-A-T-G-C--A-A-G--TAC--GA-A-CG-----------GTAGGA-C-A--G-----------------------------------G-T-C--------------------TTC-G---------------------------G--A--T---------------------------G-C-T----G--AC--G-------AG-T-G-G-C-GA-A--C--G-GG--T--G-A-G-T-A-AT-A-C-A-T-C-GG---A-A-C-GT-G--C-C-CGA--TC-G----T-G-G-G-G-G---AT-AA-C--GA------------------A-G-C-…
>ICSZ4EG02F0L6V
A-T-T--G-A-A-C-G-C--T-G-G-C--G-G--A-A-T-G---C---T-T--TA-C--AC-A-T-G-C--A-A-G--T-C--GA-G-CG-----------G-CAG--C-G--C---------------------------------G-G-G----------------------GCA-A------------------------------C--C-T-------------------------G-G-C----G--GC--G-------AG-C-G-G-C-GA-A--C--G-GG--T--G-A-G-T-A-AT-A-C-A-T-C-GG---A-A-C-GT-G--C-C-CAG--TA-G----T-G-G-G-G-G---AT-AA-C--TG------------------C-T-C-…
>ICSZ4EG01CAPFQ
G-A-T--G-A-A-C-G-C--T-A-G-C--G-A--C-A-G-G---C---T-T--AA-C--AC-A-T-G-C--A-A-G--T-C--GA-G-GG-----------G-CAG--C----G----------------G-----------GG---G-A----G--------------------TA-G----------------C----------A--A--TAC-T-C--CT-----------------G-C-C----G--GC--G-------AC-C-G-G-C-GC-A--C--G-GG--T--G-A-G-T-A-AC-A-C-G-T-A-TG---CAA-C-CT-G--C-C-CGC--CA-C----A-G-G-G-G-G---AT-AA-G--CG------------------G-A-A-…
>ICSZ4EG01C8UEL
A-T-T--G-A-A-C-A-C--T-G-G-C--G-G--C-A-T-G---C---C-T--TA-C--AC-A-T-G-C--A-A-G--T-C--GA-A-CG-----------G-TAA--C-A--G-----------------------------------G-T-C--------------------TTC-G---------------------------G--A--T---------------------------G-C-T----G--AC--G-------AG-T-G-G-C-GA-A--C--G-GG--T--G-A-G-T-A-AT-A-C-A-T-C-GG---A-A-C-GT-G--C-C-CGA--TC-G----T-G-G-G-G-G---AT-AA-C--GA------------------A-G-C-…
>ICSZ4EG01C8GAS
A-A-C--G-A-A-C-G-C--T-G-G-C--G-G--C-A-T-G---C---C-T--AA-C--AC-A-T-G-C--A-A-G--T-C--GA-A-CG-A---------G-A-----------------------------------------------C-C--------------------TTC-G---------------------------G--G------------------------------------------TC--T-------AG-T-G-G-C-GC-A--C--G-GG--T--G-C-G-T-A-AC-G-C-G-T-G-GG---A-A-T-CT-G--C-C-CTT--GG-G----T-T-C-G-G-A---AT-AG-C--TC------------------G-C-C-…
>ICSZ4EG01C7XHO
A-T-T--G---A-C-G-C--T-G-G-C--G-G--C-G-T-G---C---C-T--TA-C--AC-G-T-G-C--A-A-G--T-C--GA-G-CG-----------G-TAA--C-A--G-----------------------------------G-T-C--------------------TTC-G---------------------------G--A--T---------------------------G-C-T----G--AC--G-------AG-T-G-G-C-GA-A--C--G-GG--T--G-A-G-T-A-AT-A-C-A-T-C-GG---A-A-C-GT-G--C-C-CGA--TC-G----T-G-G-G-G-G---AT-AA-C--GA------------------A-G-C-…
>ICSZ4EG01C4FSF
A-T-T--G-A-A-C-G-C--T-G-G-C--G-G--C-A-T-G---C---C-T--TA-C--AC-A-T-G-C--A-A-G--T-C--GA-A-CG-----------G-TA-----A--C---------------------------------G-G-G----------------------TCC-T---------------------------T--C--G-G-------------------------G-A-T----GCCGAC-G-------AG-T-G-G-C-GA-A--C--G-GG--T--G-A-G-T-A-AT-A-T-A-T-C-GG---A-A-C-GT-G--C-C-CAG--TA-G----T-G-G-G-G-G---AT-AA-C--TG------------------C-T-C-…
>ICSZ4EG01C38I4
A-A-C--G-A-A-C-G-C--T-G-G-C--G-G--C-A-T-G---C---C-T--AA-T--AC-A-T-G-C--A-A-G--T-C--GA-A-CG-A---------G-A-----------------------------------------------T-C--------------------TTC-G---------------------------G--A------------------------------------------TC--T-------AG-T-G-G-C-GC-A--C--G-GG--T--G-C-G-T-A-AC-G-C-G-T-G-GG---A-A-T-CT-G--C-C-CTT--GG-G----T-T-C-G-G-A---AT-AA-CA-TC------------------G---G-…
>ICSZ4EG01BXTFJ
A-A-C--G-A-A-C-G-C--T-G-G-C--G-G--C-A-T-G---C---C-T--AA-C--AC-A-T-G-C--A-A-G--T-C--GA-A-CG-A---------G-A-----------------------------------------------C-C--------------------TTC-G---------------------------G--G------------------------------------------TC--T-------AG-T-G-G-C-GC-A--C--G-GG--T--G-C-G-T-A-AC-G-C-G-T-G-GG---A-A-T-CT-G--C-C-CTT--GG-G----T-T-C-G-G-A---AT-AA-C--TC------------------G-C-C-…
>ICSZ4EG01BXDTD
A-A-C--G-A-A-C-G-C--T-G-G-C--G-G--T-A-T-G---C---C-T--AA-C--AC-A-T-G-C--A-A-G--T-C--GA-A-CG-----------G-TA-----A--C---------------------------------G-G-G----------------------TCC-T---------------------------T--C--G-G-------------------------G-A-T----GCCGAC-G-------AG-T-G-G-C-GA-A--C--G-GG--T--G-A-G-T-A-AT-A-T-A-T-C-GG---A-A-C-GT-G--C-C-CAG--TA-G----T-G-G-G-G-G---AT-AA-C--TG------------------C-T-C-…
>ICSZ4EG01BURJ7
G-T-T--G-A-A-C-G-C--T-G-G-C--G-G--C-A-T-G---C---C-T--TA-C--AC-A-T-G-C--A-A-G--T-C--GA-A-CG-----------G-TAA--C-A--G-----------------------------------G-T-C--------------------TTC-G---------------------------G--A--T---------------------------G-C-T----G--AC--G-------AG-T-G-G-C-GA-A--C--G-GG--T--G-A-G-T-A-AT-A-C-A-T-C-GG---A-A-T-GT-G--C-C-CAG--GC-G----T-G-G-G-G-G---AT-AA-C--GA------------------G-G-C-…
>ICSZ4EG01BO52K
A-T-T--G-A-A-C-G-C--T-G-G-C--G-G--C-A-C-G---C---C-T--TA-C--AC-A-T-G-C--A-A-G--T-C--GA-A-CG-----------G-TA-----A--C---------------------------------G-G-G-G--------------------TCC-T---------------------------T--C--G-G-------------------------GAG-T----GCCGAC-G-------AG-T-G-G-C-GA-A--C--G-GG--T--G-A-G-T-A-AT-A-T-A-T-C-GG---A-A-C-GT-G--C-C-CAG--CA-G----T-G-G-G-G-G---AT-AA-C--TG------------------C-T-C-…
>ICSZ4EG01BNMRV
A-A-C--G-A-A-C-G-C--T-G-G-C--G-G--C-A-T-G---C---C-T--AA-C--AC-A-T-G-C--A-A-G--T-C--GA-A-CG-A---------G-A-----------------------------------------------C-C--------------------TTC-G---------------------------G--G------------------------------------------TC--T-------AG-T-G-G-T-GC-A--C--G-GG--T--G-C-G-T-A-AC-G-C-G-T-G-GG---A-A-T-CT-G--C-C-CTT--GG-A----T-C-C-G-G-A---AT-AA-C--TC------------------G-C-C-…
>ICSZ4EG01BNJ77
A-T-T--G-A-A-C-G-C--T-G-G-C--G-G--C-A-C-G---C---C-T--TA-C--AC-A-T-G-C--A-A-G--T-C--GA-A-CG-----------G-TA-----A--C---------------------------------G-G-G----------------------TCC-T---------------------------T--C--G-G-------------------------G-A-T----GCCGAC-G-------AG-T-G-G-C-GA-A--C--G-GG--T--G-A-G-T-A-AT-A-T-A-T-C-GG---A-A-C-GT-G--C-C-CAG--CA-G----T-G-G-G-G-G---AT-AA-C--TG------------------C-T-C-…
>ICSZ4EG01BLZ5E
A-A-C--G-A-A-C-G-C--T-G-G-C--G-G--C-A-T-G---C---C-T--AA-C--AC-A-T-G-C--A-A-G--T-C--GA-G-CG-G---------G-C-----------------------------------------------A-C--------------------TTC-G---------------------------G--T------------------------------------------GT--C-------AG-C-G-G-C-GG-A--C--G-GG--T--T-A-G-T-A-AC-G-C-G-T-G-GG---A-A-C-GT-G--C-C-CTT--CA-C----T-G-C-G-G-A---AT-AG----CA------------------T-TGG-…
>ICSZ4EG01BLLM8
A-A-C--G-A-G-C-G-C--T-G-G-C--G-G--C-A-T-G---C---C-T--AA-C--AC-A-T-G-C--A-A-G--T-C--GA-A-CG-G---------G-A-----------------------------------------------C-C--------------------TTC-G---------------------------G--G------------------------------------------TC--T-------AG-T-G-A-C-GC-A--C--G-GG--T--G-C-G-T-A-AC-G-C-G-T-G-GG---A-A-T-CT-G--C-C-CTT--GG-G----T-T-C-G-G-A---AT-AA-C--TC------------------G-C-C-…
>ICSZ4EG01BLJW8
A-T-T--G-A-A-C-G-C--T-G-G-C--G-G--C-A-T-G---C---C-T--TA-C--AC-A-T-G-C--A-A-G--T-C--GA-A-CG-----------G-TA-----A--C---------------------------------G-G-G----------------------TCC-T---------------------------T--C--G-G-------------------------G-A-T----GCCGAC-G-------AG-T-G-G-C-GA-A--C--G-GG--T--G-A-G-T-A-AT-A-T-A-T-C-GG---A-A-C-GT-G--C-C-CAG--TA-G----T-G-G-G-G-G---AT-AA-C--TG------------------C-T-C-…
>ICSZ4EG01BL340
G-A-C--G-A-A-C-G-C--T-G-G-C--G-G--C-A-T-G---C---C-T--AA-C--AC-A-T-G-C--A-A-G--T-C--GA-A-CG-A---------G-A-----------------------------------------------C-C--------------------TTC-G---------------------------G--G------------------------------------------TC--T-------AG-T-G-G-C-GC-A--C--G-GG--T--G-C-G-T-A-AC-G-C-G-T-G-GG---A-A-T-CT-G--C-C-CTT--GG-G----T-T-C-G-G-A---AT-AA-C--TC------------------G-C-C-…
>ICSZ4EG01CSTFR
A-T-T--G-A-A-C-G-C--T-G-G-C--G-G--C-A-T-G---C---C-T--TA-C--AC-A-T-G-C--A-A-G--T-C--GA-A-CG-----------G-TAA--C-A------------------------------------G-G-T-C--------------------TTC-G---------------------------G--A--C---------------------------G-C-T----G--AC--G-------AG-T-G-G-C-GA-A--C--G-GG--T--G-A-G-T-A-AT-A-C-A-T-C-GG---A-A-C-GT-G--C-C-CAG--TC-G----T-G-G-G-G-G---AT-AA-C--TA------------------C-T-C-…
>ICSZ4EG01AT9P0
A-T-T--G-A-A-C-G-C--T-G-G-C--G-G--C-A-T-G---C---C-T--TA-C--AC-A-T-G-C--A-A-G--T-C--GA-A-CG-----------G-TAA--C-G--G-----------------------------------G-TCC--------------------TTCGG---------------------------G--A--T---------------------------G-C-C----G--AC--G-------AG-T-G-G-C-GA-A--C--G-GG--T--G-A-G-T-A-AT-A-T-A-T-C-GG---A-A-C-GT-G--C-C-CAG--GC-G----T-G-G-G-G-G---AT-AA-C--GA------------------G-G-C-…
>ICSZ4EG01BE6WW
A-T-T--G-A-A-C-G-C--T-G-G-C--G-G--C-A-T-G---C---C-T--TA-C--GC-A-T-G-C--A-A-G--T-C--GA-A-CG-----------G-TAA-CGGAT-C-------------------------------------C----------------------TTCGGGA----------------------------T------------------------------G-C-C----G--AC--G-------AG-T-G-G-C-GA-A--C--G-GG--T--G-A-G-T-A-AT-A-T-A-T-C-GG---A-A-C-GT-G--C-C-CAG--TA-G----T-G-G-G-G-G---AT-AA-C--TG------------------C-T-C-…
>ICSZ4EG01BE1KF
A-A-C--G-A-A-C-G-C--T-G-G-C--G-G--C-A-G-G---C---T-T--AA-C--AC-A-T-G-C--A-A-G--T-C--GA-G-CG-G---------G-C---------------------------------------------G-T-A--------------------GCA-A---------------------------T--A--C---------------------------------------GT--C-------AG-C-G-G-C-AG-A--C--G-GG--T--G-A-G-T-A-AC-G-C-G-T-G-GG---A-A-C-GT-A--C-C-TTT--TG-G----T-T-C-G-G-A---AC-AA-C--TG------------------A-G-G-…
>ICSZ4EG01BBLO9
A---T--G-A-A-C-G-C--T-A-G-C--G-G----G-G-G---C---C-T--AA-C--AC-A-T-G-C--A-A-G--T-C--GA-A-CG-----------G-TA-----A--C---------------------------------G-G-G----------------------TCC-T---------------------------T--C--G-G-------------------------G-A-T----GCCGAC-G-------AG-T-G-G-C-GA-A--C--G-GG--T--G-A-G-T-A-AT-A-T-A-T-C-GG---A-A-C-GT-G--C-C-CAG--TA-G----T-G-G-G-G-G---AT-AA-C--TG------------------C-T-C-…
>ICSZ4EG01B7VTG
A-T-T--G-A-A-C-G-C--T-G-G-C--G-G--C-A-T-G---C---C-T--TA-C--AC-A-T-G-C--A-A-G--T-C--GA-A-CG-----------G--GT--A-A--C---------------------------------G-G-G----------------------TCC-T---------------------------T--C--G-G-------------------------G-A-T----GCCGAC-G-------AG-T-G-G-C-GA-G--C--G-GG--T--G-A-G-T-A-AT-A-T-A-T-C-GG---A-A-C-GT-G--C-C-CAG--TA-G----T-G-G-G-G-G---AT-AA-C--TG------------------C-T-C-…
>ICSZ4EG01B68X4
A-A-C--G-A-A-C-G-C--T-G-G-C--G-G--C-A-T-G---C---C-T--TA-C--AC-A-T-G-C--A-A-G--T-C--GA-A-CG-----------G-TAA--C-A--G-----------------------------------G-T-C--------------------TTC-G---------------------------G--A--T---------------------------G-C-T----G--AC--G-------AG-T-G-G-C-GA-A--C--G-GG--T--G-A-G-T-A-AT-A-C-A-T-C-GG---A-G-C-GT-G--C-C-CGA--TC-G----T-G-G-G-G-G---AT-AA-C--GA------------------G-G-C-…
>ICSZ4EG01B4WRZ
A---C--G-A-A-C-G-C--T-G-G-C--G-G--C-A-T-G---C---C-T--TA-C--AC-A-T-G-C--A-A-G--T-C--GA-A-CG-----------G-TAA--C-A--G-----------------------------------G-T-C--------------------TTC-G---------------------------G--A--T---------------------------G-C-T----G--AC--G-------AG-T-G-G-C-GA-A--C--G-GG--T--G-A-G-T-A-AT-A-C-A-T-C-GG---A-A-C-GT-G--C-C-CGA--TC-G----T-G-G-G-G-G---AT-AA-C--GA------------------G-G-C-…
>ICSZ4EG01AWZF4
A-T-T--G-A-A-C-G-C--T-G-G-C--G-G--C-A-T-G---C---C-T--TA-C--AC-A-T-G-C--A-A-G--T-C--GA-A-CG-----------G-TA-----A--C---------------------------------G-G-G----------------------TCC-T---------------------------T--C--G-G-------------------------G-A-T----GCCGAC-G-------AG-T-G-G-C-GA-A--C--G-GG--T--G-A-G-T-A-AT-A-T-A-T-C-GG---A-A-C-GT-G--C-C-CAG--TA-G----T-G-A-G-G-G---AT-AA-C--TG------------------C-T-C-…
>ICSZ4EG01ATH8P
G-A-T--G-A-A-C-G-C--T-G-G-C--G-G--C-A-T-G---C---T-T--AA-C--AC-A-T-G-C--A-A-G--T-C--GA-A-CG-A---------G-A-----------------------------------------------C-C--------------------TTC-G---------------------------G--G------------------------------------------TC--T-------AG-T-G-G-C-GC-A--C--G-GG--T--A-C-G-T-A-AC-G-C-G-T-G-GG---A-A-T-CT-G--C-C-CTT--GG-G----T-T-C-G-G-A---AT-AA-C--TC------------------G-C-C-…
>ICSZ4EG01CY1I3
A-T-T--G-A-A-C-G-C--T-G-G-C--G-G--C-A-T-G---C---C-T--TA-C--AC-A-T-G-C--A-A-G--T-C--GA-A-CG-----------G-TA-----A--C---------------------------------A-G-G-T--------------------CTT-C---------------------------G--G--A-T-------------------------G-C-T----G--AC--G-------AG-T-G-G-C-GA-A--C--G-GG--T--G-A-G-T-A-AT-A-C-A-T-C-GG---A-A-C-GT-G--C-C-CAG--GC-G----T-G-G-G-G-G---AT-AA-C--GA------------------G-G-C-…
>ICSZ4EG01AQB3R
A-A-C--G-A-A-C-G-C--T-G-G-C--G-G--C-A-T-G---C---C-T--AA-C--AC-A-T-G-C--A-A-G--T-C--GA-A-CG-A---------G-G---------------------------------------------C-C-C--------------------TTC-----------------------------G--G--G---------------------------------------TT--T-------AG-T-G-G-C-GC-A--C--G-GG--T--G-C-G-T-A-AC-G-C-G-T-G-GG---A-A-T-CT-G--C-C-CTT--TG-G----T-T-C-G-G-A---AT-AA-C--AG------------------C-T-G-…
>ICSZ4EG01AK5ZG
A-A-C--G-A-A-C-G-C--T-G-G-C--G-A--C-A-T-G---C---C-T--AA-C--AC-A-T-G-C--A-A-G--T-C--GA-A-CG-A---------G-A-----------------------------------------------C-C--------------------TTC-G---------------------------G--G------------------------------------------TC--T-------AG-T-G-G-C-GC-A--C--G-GG--T--G-C-G-T-A-AC-G-C-G-T-G-GG---A-A-T-CT-G--C-C-CTT--GG-G----T-T-C-G-G-A---AT-AA-C--TC------------------G-C-C-…
>ICSZ4EG01ANZ1R
A-T-T--G-A-A-C-G-C--T-G-G-C--G-G--C-A-T-G---C---C-T--TA-C--AC-A-T-G-C--A-A-G--T-C--GA-A-CG-----------G-TA-----A--C---------------------------------A-G-G-T--------------------CTT-C---------------------------G--G--A-T-------------------------G-C-T----G--AC--G-------AG-T-G-G-C-GA-A--C--G-GG--T--G-A-G-T-A-AT-A-C-A-T-C-GG---A-A-C-GT-G--C-C-CGA--TC-G----T-G-G-G-G-G---AT-AA-C--TG------------------C-T-C-…
>ICSZ4EG01AIFYU
A-A-C--G-A-A-C-G-C--T-G-G-C--G-G--C-A-T-G---C---C-T--TA-C--AC-A-T-G-C--A-A-G--T-C--GA-A-CG-----------G-TAA--C-A--G-----------------------------------G-T-C--------------------TTC-G---------------------------G--A--T---------------------------G-C-T----G--AC--G-------AG-T-G-G-C-GA-A--C--G-GG--T--G-A-G-T-A-AT-A-C-A-T-C-GG---A-A-C-GT-G--C-C-CGA--TC-G----T-G-G-G-G-G---AT-AA-C--GA------------------G-G-C-…
>ICSZ4EG01A105Y
A-T-T--G-A-A-C-G-C--T-G-G-C--G-G--C-A-T-G---C---C-C--TA-C--AC-A-T-G-C--A-A-G--T-C--GA-A-CG-----------G-TAA--C-A--G-----------------------------------G-T-C--------------------TTC-G---------------------------G--A--T---------------------------G-C-T----G--AC--G-------AG-T-G-G-C-GA-A--C--G-GG--T--G-A-G-T-A-AT-A-C-A-T-C-GG---A-A-C-GT-G--C-C-CGA--TC-G----T-G-G-G-G-G---AT-AA-C--GA------------------A-G-C-…
>ICSZ4EG01DKY0M
A-A-C--G-A-A-C-G-C--T-G-G-C--G-G--C-A-T-G---C---C-T--AA-C--AC-A-T-G-C--A-A-G--T-C--GA-A-CG-A-----------A---------------------------------------------G-G-C--------------------TTC-G---------------------------G--C--C---------------------------------------T---T-------AG-T-G-G-C-GC-A--C--G-GG--T--G-C-G-T-A-AC-G-C-G-T-G-GG---A-A-T-CT-G--C-C-CTT--AG-G----T-T-C-G-G-A---AT-AA-C--AG------------------T-T-A-…
>ICSZ4EG01DHASN
G-A-C--G-A-A-C-G-C--T-G-G-C--G-G--C-G-T-G---C---C-T--AA-T--AC-A-T-G-C--A-A-G--T-C--GA-A-CG-A---------A-CC---G-C--A----------------------------AC-T-T-G-A-A--------------------CTT-G------------------------------T--T-C-TGG--T------------------T-A-A----G--GT--T-------AG-T-G-G-C-GC-A--C--G-GG--T--G-A-G-T-A-AC-A-C-G-T-G-GG---GAA-C-CT-G--C-C-CTT--TA-G----T-G-G-G-G-G---AT-AA-C--AG------------------T-C-G-…
>ICSZ4EG01DOCDA
G-A-T--G-A-A-C-G-C--T-G-G-C--G-G--C-G-T-G---C---T-T--AA-C--AC-A-T-G-C--A-A-G--T-C--GA-A-CG-A---------A-G----C-A-------------TGTAA-A-----------AC-A-A-T-C-C--------------------TTC-G---------------------------G--G--T-G-T-G--TTT--TA-T------------A-T----GA-CT--G-------AG-T-G-G-C-GG-A--C--G-GG--T--G-A-G-T-A-AC-G-C-G-T-G-GG---GAA-C-CT-G--C-C-GTA--TG-C----A-G-G-G-G-G---AC-AA-C--AG------------------T-C-A-…
>ICSZ4EG01CZX2R
G-A-C--G-A-A-C-G-C--T-G-G-C--G-G--C-G-T-G---C---C-T--AA-T--AC-A-T-G-C--A-A-G--T-C--GA-A-CG-A---------A-CC---G-C--A----------------------------AC-T-T-G-A-A--------------------CTT-G------------------------------T--T-C-T-CG-T------------------T-A-A----G--GT--T-------AG-T-G-G-C-GC-A--C--G-GG--T--G-A-G-T-A-AC-A-C-G-T-G-GG---GAA-C-CT-G--C-C-CTT--TA-G----T-G-G-G-G-G---AT-AA-C--AG------------------T-C-G-…
>ICSZ4EG01EPR3E
G-A-T--G-A-A-C-G-C--T-G-G-C--G-G--C-G-T-G---C---C-T--AA-C--AC-A-T-G-C--A-A-G--T-C--GA-A-CG-G---------A-G---------C----------CTA-A-T-----------CA-G-CAG-A--AGCGG---------------CCA-G------------C-TTG----------C--TG-G-A-A-G-CGGA-AGCAGAA----------A-AG---G--CT--T-------AG-T-G-G-C-GG-A--C--G-GG--T--G-A-G-T-A-AC-G-C-G-T-G-GG---TAA-C-CT-G--G-C-CCA--TA-C----A-G-G-G-G-G---AT-AA-C--AC------------------T-T-A-…
>ICSZ4EG01BZQOF
G-A-T--G-A-A-C-G-C--T-A-G-C--G-A--C-A-G-G---C---T-T--AA-C--AC-A-T-G-C--A-A-G--T-C--GA-G-GG-----------G-CAG--C-G--G----------------G-----------GC-GAG-T------------------------GCTTG------------------------------C--A-C-TCG--CT-----------------G-C-C----G--GC--G-------AC-C-G-G-C-GC-A--C--G-GG--T--G-A-G-T-A-AC-A-C-G-T-A-TG---GAA-C-CT-G--C-C-CGC--AG-C----A-G-G-G-G-G---AT-AA-G--CG------------------G-A-A-…
>ICSZ4EG01CKWQZ
G-A-C--G-A-A-C-G-C--T-G-G-C--G-G--C-G-T-G---C---T-T--AA-C--AC-A-T-G-C--A-A-G--T-C--GA-A-CG-G---------A-A----A-T--C-----------------------------A-G-G-G-A-G--------------------CTT-G---------------------------C--T--C-C-C-T-----------------------G-T----G--AT--T-------AG-T-G-G-C-GA-A--C--G-GG--T--G-A-G-T-A-AC-A-C-G-T-G-AG---CAA-C-CT-G--C-C-CCT--AA-C----T-T-T-G-G-G---AT-AA-C--TT------------------C-G-G-…
>ICSZ4EG01D8YX0
G-A-T--G-A-A-C-G-C--T-G-G-C--G-G--C-G-T-G---C---T-T--AA-C--AC-A-T-G-C--A-A-G--T-C--GA-A-CG-A---------G-A-----------------------------------------------C-C--------------------TTC-G---------------------------G--G------------------------------------------TC--T-------AG-T-G-G-C-GC-A--C--G-GG--T--G-C-G-T-A-AC-G-C-G-T-G-GG---A-A-T-CT-G--C-C-CTT--GG-G----T-T-C-G-G-A---AT-AA-C--TC------------------G-C-C-…
>ICSZ4EG01A6QUG
G-A-T--G-A-A-C-G-C--T-G-G-C--G-G--C-G-T-G---C---T-T--AA-C--AC-A-T-G-C--A-A-G--T-C--GA-A-CG-A---------A-G----C-A--T---------T------TACCAA------GG-A-T-T-T-C--------------------TTC-G---------------------------GA-ATGACT-A-A--TA-------A-----------A-T----GA-CT--G-------AG-T-G-G-C-GG-A--C--G-GG--T--G-A-G-T-A-AC-G-C-G-T-G-GG---TAA-C-CT-G--C-C-TTA--CA-C----A-G-G-G-G-G---AC-AA-C--AG------------------C-T-G-…
>ICSZ4EG01BJYZS
A-A-C--G-A-A-C-G-C--T-G-G-C--G-G--C-A-T-G---C---C-T--AA-C--AC-A-T-G-C--A-A-G--T-C--GA-A-CG-A---------G-A-----------------------------------------------C-C--------------------TTC-----------------------------G--G--G---------------------------------------TC--T-------AG-T-G-G-C-GC-A--C--G-GG--T--G-C-G-T-A-AC-G-C-G-T-G-GG---A-A-T-CT-G--C-C-CTT--AG-G----T-T-C-G-G-A---AT-AA-C--AG------------------T-T-A-…
>ICSZ4EG01ET20A
A-A-C--G-A-A-C-G-C--T-G-G-C--G-G--C-A-T-G---C---C-T--AA-C--AC-A-T-G-C--A-A-G--T-C--GA-A-CG-A---------A-G-----------------------------------------------G-C--------------------TTC-G---------------------------G--C------------------------------------------CT--T-------AG-T-G-G-C-GC-A--C--G-GG--T--G-C-G-T-A-AC-G-C-G-T-G-GG---A-A-T-CT-G--C-C-CTT--AG-G----T-T-C-G-G-A---AT-AA-C--AG------------------T-T-A-…
>ICSZ4EG01EDS3U
A-A-C--G-A-A-C-G-C--T-G-G-C--G-G--C-A-T-G---C---C-TA--A-C--AC-A-T-G-C--A-A-G--T-C--GA-A-CG-A---------G-A-----------------------------------------------C-C--------------------TTC-G---------------------------G--G------------------------------------------TC--T-------AG-T-G-G-C-GC-A--C--G-GG--T--G-C-G-T-A-AC-G-C-G-T-G-GG---A-A-T-CT-G--C-C-CTT--GG-G----T-T-C-G-G-A---AT-AA-C--TC------------------G-C-C-…
>ICSZ4EG01AXG1I
A-A-C--G-A-A-C-G-C--T-G-G-C--G-G--C-A-T-G---C---C-T--AA-C--AC-A-T-G-C--A-A-G--T-C--GA-A-CG-G---------A-G---------C----------CTA-A-T-----------CA-G-CAG-A--AGCGG---------------CCA-G------------C-TTG----------C--TG-G-A-A-G-CGGA-AGCAGAA----------A-AG---G--CT--T-------AG-T-G-G-C-GG-A--C--G-GG--T--G-A-G-T-A-AC-G-C-G-T-G-GG---TAA-C-CT-G--G-C-CCA--TA-C----A-G-G-G-G-G---AT-AA-C--AC------------------T-T-A-…
>ICSZ4EG01D0AE5
A-T-T--G-A-A-C-G-C--T-G-G-C--G-G--C-A-T-G---C---C-T--TA-C--AC-A-T-G-C--A-A-G--T-C--GA-A-CG-----------G-TAA--C-G--G-----------------------------------G-TCC--------------------TTCGG---------------------------G--A--T---------------------------G-C-C----G--AC--G-------AG-T-G-G-C-GA-A--C--G-GG--T--G-A-G-T-A-AT-A-T-A-T-C-GG---A-A-C-GT-G--C-C-CAG--TA-G----T-G-G-G-G-G---AT-AA-C--TG------------------C-T-C-…
>ICSZ4EG01DPT3Y
A-T-T--G-A-A-C-G-C--T-G-G-C--G-G--C-A-T-G---C---C-T--TA-C--AC-A-T-G-C--A-A-G--T-C--GA-A-CG-----------G-TAA--CGG--G-------------------------------------TCC--------------------TTCGG---------------------------G--A--T---------------------------G-C-C----G--AC--G-------AG-T-G-G-C-GA-A--C--G-GG--T--G-A-G-T-A-AT-A-C-A-T-C-GG---A-A-C-GT-G--C-C-CGA--TC-G----T-G-G-G-A-G---AT-AA-C--GA------------------G-G-C-…
>ICSZ4EG01DP9EF
A-A-C--G-A-A-C-G-C--T-G-G-C--G-G--C-A-T-G---C---C-T--AA-C--AC-A-T-G-C--A-A-G--T-C--GA-A-CA-A---------G-A-----------------------------------------------C-C--------------------TTC-G---------------------------G--G------------------------------------------TC--T-------AG-T-G-G-C-GC-A--C--G-GG--T--G-C-G-T-A-AC-G-C-G-T-G-GG---A-A-T-CT-G--C-C-CTT--GG-G----T-T-C-G-G-A---AT-AA-C--TT------------------G-C-C-…
>ICSZ4EG01DBXB9
G-A-C--G-A-A-C-G-C--T-G-G-C--G-G--C-G-T-G---C---C-T--AA-T--AC-A-T-G-C--A-A-G--T-C--GA-A-CG-A---------A-CC---G-C--A----------------------------AC-T-T-G-A-A--------------------CTT-G------------------------------T--T-C-TGG--T------------------T-A-A----G--GT--T-------AG-T-G-G-C-GC-A--C--G-GG--T--G-A-G-T-A-AC-A-C-G-T-G-GG---GAA-C-CT-G--C-C-CTT--TA-G----T-G-G-G-G-G---AT-AA-C--AG------------------T-C-G-…
>ICSZ4EG01CYQ0K
A-A-C--G-A-A-C-G-C--T-G-G-C--G-G--C-A-T-G---C---C-T--AA-C--AC-A-T-G-C--A-A-G--T-C--GA-A-CG-----------G-CAA--C-A--G-----------------------------------G-T-C--------------------TTC-G---------------------------G--A--T---------------------------G-C-T----G--AC--G-------AG-T-G-G-C-GA-A--C--G-GG--T--G-A-G-T-A-AT-A-C-A-T-C-GG---A-A-C-GT-G--C-C-CGA--TC-G----T-G-G-G-G-G---AT-AA-C--GA------------------A-G-C-…
>ICSZ4EG01CKHV6
A-A-C--G-A-A-C-G-C--T-G-G-C--G-G--C-A-T-G---C---C-T--AA-C--AC-A-T-G-C--A-A-G--T-C--GA-A-CG-A---------A-G-----------------------------------------------G-C--------------------TTC-G---------------------------G--C------------------------------------------CT--T-------AG-T-G-G-C-GC-A--C--G-GG--T--G-C-G-T-A-AC-G-C-G-T-G-GG---A-A-T-CT-G--C-C-CTT--AG-G----T-T-C-G-G-A---AT-AA-C--AG------------------T-T-A-…
>ICSZ4EG01BFHWN
A-A-C--G-A-A-C-G-C--T-G-G-C--G-G--C-A-G-G---C---T-T--AA-C--AC-A-T-G-C--A-A-G--T-C--G--A--G-C---------G-C-----------------------------------------------C-C--------------------CGC-A---------------------------A--G------------------------------------------GG--G-------AG-C-G-G-C-AG-A--C--G-GG--T--G-A-G-T-A-AC-G-C-G-T-G-GG---A-A-T-CT-G--C-C-CTT--GG-G----T-T-C-G-G-A---AT-AA-C--TC------------------G-C-C-…
>ICSZ4EG01EYMHU
A-G-C--G-A-A-C-G-C--T-G-G-C--G-G--C-A-G-G---C---T-T--AA-C--AC-A-T-G-C--A-A-G--T-C--GA-G-CG-G---------G-C---------------------------------------------G-T-A--------------------GCA-A---------------------------T--A--C---------------------------------------GT--C-------AG-C-G-G-C-AG-A--C--G-GG--T--G-A-G-T-A-AC-G-C-G-T-G-GG---A-A-C-GT-A--C-C-CTT--TG-G----T-T-C-G-G-A---AT-AA-C--GC------------------A-G-G-…
>ICSZ4EG01D2RKT
A-A-C--G-A-A-C-G-C--T-G-G-C--G-G--C-A-T-G---C---C-TA--A-C--AC-A-T-G-C--A-A-G--T-C--GA-A-CG-A---------G-A-----------------------------------------------C-C--------------------TTC-G---------------------------G--G------------------------------------------TC--T-------AG-T-G-G-C-GC-A--C--G-GG--T--G-C-G-T-A-AC-G-C-G-T-G-GG---A-A-T-CT-G--C-C-CTT--GG-G----T-T-C-G-G-A---AT-AA-C--TC------------------G-C-C-…
>ICSZ4EG01BJ6YP
G-T-T--G-A-A-C-G-C--T-G-G-C--G-G--C-A-T-G---C---C-T--TA-C--AC-A-T-G-C--A-A-G--T-C--GA-A-CG-----------G-TA-----A--C---------------------------------G-G-G----------------------TCC-T---------------------------T--C--G-G-------------------------G-A-T----GCCGAC-G-------AG-T-G-G-C-GA-A--C--G-GG--T--G-A-G-T-A-AT-A-T-A-T-C-GG---A-A-C-GT-G--C-C-CAG--TA-G----T-G-G-G-G-G---AT-AA-C--TG------------------C-T-C-…
>ICSZ4EG01BCXAO
G-A-C--G-A-A-C-G-C--T-G-G-C--G-G--C-A-T-G---C---C-T--AA-C--AC-A-T-G-C--A-A-G--T-C--GA-A-CG-A---------G-A-----------------------------------------------C-C--------------------TTT-G---------------------------G--G------------------------------------------TC--T-------AG-T-G-G-C-GC-A--C--G-GG--T--G-C-G-T-A-AC-G-T-G-T-G-GG---A-A-T-CT-G--C-C-CTT--GG-G----T-T-C-G-G-A---AT-AA-C--TC------------------G-C-C-…
>ICSZ4EG01DN387
A-T-T--G-A-A-C-G-C--T-G-G-C--G-G--C-A-T-G---C---C-T--TA-C--AC-A-T-G-C--A-A-G--T-C--GA-A-CG-----------G-TAA--C-G--G-----------------------------------G-TCC--------------------TTCGG---------------------------G--A--T---------------------------G-C-C----G--AC--G-------AG-T-G-G-C-GA-A--C--G-GG--T--G-A-G-T-A-AT-A-C-A-T-C-GG---A-A-C-GT-G--C-C-CAG--GC-G----T-G-G-G-G-G---AT-AA-C--GA------------------G-G-C-…
>ICSZ4EG01B9WB6
A-A-C--G-A-A-C-G-C--T-G-G-C--G-G--C-A-T-G---C---C-T--AA-C--AC-A-T-G-C--A-A-G--T-C--GA-A-CG-A---------A-G-----------------------------------------------G-C--------------------TTC-G---------------------------G--C------------------------------------------CT--T-------AG-T-G-G-C-GC-A--C--G-GG--T--G-C-G-T-A-AC-G-C-G-T-G-GG---A-A-T-CT-G--C-C-CTT--AG-G----T-T-C-G-G-A---AT-AA-C--AG------------------T-T-A-…
>ICSZ4EG01EUP5A
A-A-C--G-A-A-C-G-C--T-G-G-C--G-G--C-A-T-G---C---C-T--AA-C--AC-A-T-G-C--A-A-G--T-C--GA-A-CG-A---------G-A-----------------------------------------------C-C---------------------TC-G---------------------------G--G------------------------------------------TC--T-------AG-T-G-G-C-GC-A--C--G-GG--T--G-C-G-T-A-AC-G-C-G-T-G-GG---A-A-T-CT-G--C-C-CTT--GG-G----T-T-C-G-G-A---AT-AA-C--TC------------------G-C-C-…
>ICSZ4EG01EUIKZ
G-A-C--G-A-A-C-G-C--T-G-G-C--G-G--C-G-T-G---C---C-T--AA-T--AC-A-T-G-C--A-A-G--T-C--GA-A-CG-A---------A-CC---G-C--G----------------------------AC-T-T-G-A-A--------------------CTT-G------------------------------T--T-C-TGG--T------------------T-A-A----G--GT--T-------AG-T-G-G-C-GC-A--C--G-GG--T--G-A-G-T-A-AC-A-C-G-T-G-GG---GAA-C-CT-G--C-C-CTT--TA-G----T-G-G-G-G-G---AT-AA-C--AG------------------T-C-G-…
>ICSZ4EG01ENXO1
T---T--G-A-A-C-G-C--T-G-G-C--G-G--C-A-T-G---C---C-T--TA-C--AC-A-T-G-C--A-A-G--T-C--GA-A-CG-----------G-TAA--C-A--G-----------------------------------G-T-C--------------------TTC-G---------------------------G--A--T---------------------------G-C-T----G--AC--G-------AG-T-G-G-C-GA-A--C--G-GG--T--G-A-G-T-A-AT-A-C-A-T-C-GG---A-A-C-GT-G--C-C-CGA--TC-G----T-G-G-G-A-G---AT-AA-C--GA------------------G-G-C-…
>ICSZ4EG01ELVJQ
A-T-T--G-A-A-C-G-C--T-G-G-C--G-G--C-A-T-G---C---C-T--TA-C--AC-A-T-G-C--A-A-G--T-C--GA-A-CG-----------G-TAA--C-G--------------------------------------G-G-T--------------------CCT-T---------------------------CGGGA-T---------------------------G-C-C----G--AC--G-------AG-T-G-G-C-GA-A--C--G-GG--T--G-A-G-T-A-AT-A-T-A-T-C-GG---A-A-C-GT-G--C-C-CAG--TA-G----T-G-G-G-G-G---AT-AA-C--TG------------------C-T-C-…
>ICSZ4EG01EKUCH
G-A-T--G-A-A-C-G-C--T-G-G-C--G-G--C-G-T-G---C---C-T--AA-C--AC-A-T-G-C--A-A-G--T-C--GA-A-CG-G---------A-G---------A---------TATTGCT------------TG-G-A-A-G-CTT------------------TTC-GA--------------------------G--G--T-G-A-A--AGA--GAAGT-----------A-T-------CT--T-------AG-T-G-G-C-GG-A--C--G-GG--T--G-A-G-T-A-AC-G-C-G-T-G-GG---CAA-C-CT-G--C-C-TCA--TA-C----A-G-G-G-G-G---AT-AG-C--AT------------------C-G-G-…
>ICSZ4EG01EKROB
G-A-T--G-A-A-C-G-C--T-G-G-C--G-G--C-G-T-G---C---C-T--AA-C--AC-A-T-G-C--A-A-G--T-C--GA-A-CG-G---------G-G----T-A--T---------ATAAG--------------CG-G-A-A-G-T--------------------TTACG---------------------------GA-T--G-G-A-A--G-G--T-TAT-----------A-T----A--CT--T-------AG-T-G-G-C-GG-A--C--G-GG--T--G-A-G-T-A-AC-G-C-G-T-G-GG---CAA-C-CT-G--C-C-CCG--TG-C----C-G-G-G-G-G---AT-AC-C--GC------------------C-T-G-…
>ICSZ4EG01EHRP8
G-A-T--G-A-A-C-G-C--T-G-G-C--G-G--C-A-T-G---C---C-T--AA-C--AC-A-T-G-C--A-A-G--T-C--GA-A-CG-A---------G-A-----------------------------------------------C-C--------------------TTC-G---------------------------G--G------------------------------------------TC--T-------AG-T-G-G-C-GC-A--C--G-GG--T--G-C-G-T-A-AC-G-C-G-T-G-GG---A-A-T-CT-G--C-C-CTT--GG-G----T-T-C-G-G-A---AT-AA-C--TT------------------G-C-C-…
>ICSZ4EG01EH05R
G-A-C--G-A-A-C-G-C--T-G-G-C--G-G--C-A-T-G---C---C-T--AA-C--AC-A-T-G-C--A-A-G--T-C--GA-A-CG-A---------G-A-----------------------------------------------C-C--------------------TTC-G---------------------------G--G------------------------------------------TC--T-------AG-T-G-G-C-GC-A--C--G-GG--T--G-C-G-T-A-AC-G-C-G-T-G-GG---A-A-T-CC-G--C-C-CTT--GG-G----T-T-C-G-G-A---AT-AA-C--TC------------------G-C-C-…
>ICSZ4EG01EEPV8
A-A-C--G-A-A-C-G-C--T-G-G-C--G-G--C-A-T-G---C---C-T--TA-C--AC-A-T-G-C--A-A-G--T-C--GA-A-CG-----------G-TAA--C-A--G-----------------------------------G-T-C--------------------TTC-G---------------------------G--A--T---------------------------G-C-T----G--AC--G-------AG-T-G-G-C-GA-A--C--G-GG--T--G-A-G-T-A-AT-A-C-A-T-C-GG---A-A-C-GT-G--C-C-CGA--TC-G----T-G-G-G-G-G---AT-AA-C--GA------------------A-G-C-…
>ICSZ4EG01EE35F
A-T-T--G-A-A-C-G-C--T-G-G-C--G-G--C-A-T-G---C---C-T--TA-C--AC-A-T-G-C--A-A-G--T-C--GA-A-CG-----------G-TAA--C-A--G-----------------------------------G-T-C--------------------TTC-G---------------------------G--A--T---------------------------G-C-T----G--AC--G-------AG-T-G-G-C-GA-A--C--G-GG--T--G-A-G-T-A-AT-A-C-A-T-C-GG---A-A-C-GT-G--C-C-CGA--TC-G----T-G-G-G-A-G---AT-AA-C--GA------------------G-G-CG…
>ICSZ4EG01AYGSU
A-T-T--G-A-A-C-G-C--T-G-G-C--G-G--C-A-T-G---C---C-T--TA-C--AC-A-T-G-C--A-A-G--T-C--GA-A-CG-----------G-TA-----A--C---------------------------------A-G-G-T--------------------CTT-C---------------------------G--G--A-T-------------------------G-C-T----G--AC--G-------AG-T-G-G-C-GA-A--C--G-GG--T--G-A-G-T-A-AT-A-C-A-T-C-GG---A-A-C-GT-G--C-C-CGA--TC-G----T-G-G-G-G-G---AT-AA-C--GA------------------A-G-C-…
>ICSZ4EG01EC1MC
G-A-T--G-A-A-C-G-C--T-G-G-C--G-G--C-A-T-G---C---C-T--AA-C--AC-A-T-G-C--A-A-G--T-C--GA-A-CG-A---------G-A-----------------------------------------------C-C--------------------TTC-G---------------------------G--G------------------------------------------TC--T-------AG-T-G-G-C-GC-A--C--G-GG--T--G-C-A-T-A-AC-G-C-G-T-G-GG---A-A-T-CT-G--C-C-CTT--GG-G----T-T-C-G-G-A---AT-AA-C--TC------------------G-C-C-…
>ICSZ4EG01DW1YV
A-T-T--G-A-A-C-G-C--T-G-G-C--G-G--C-A-T-G---C---C-T--TA-C--AC-A-T-G-C--A-A-G--T-C--GA-A-CG-----------G-TA-----A--C---------------------------------G-G-G----------------------TCC-T---------------------------T--C--G-G-------------------------G-A-T----GCCGAC-G-------AG-T-G-G-C-GA-A--C--G-GG--T--G-A-G-T-A-AT-A-T-A-T-C-GG---A-A-C-GT-G--C-C-CAG--TA-G----T-G-G-G-G-G---AT-AA-C--TG------------------C-T-C-…
>ICSZ4EG01DSGRP
A-A-C--G-A-A-C-G-C--T-G-G-C--G-G--C-A-T-G---C---C-T--AA-C--AC-A-T-G-C--A-A-G--T-C--GA-A-CG-A---------G-A-----------------------------------------------T-C--------------------TTC-G---------------------------G--A------------------------------------------TC--T-------AG-T-G-G-C-GC-A--C--G-GG--T--G-C-G-T-A-AC-G-C-G-T-G-GG---A-A-T-CT-G--C-C-CTT--TG-G----T-T-C-G-G-A---AT-AA-C--AG------------------T-T-G-…
>ICSZ4EG01DP6YO
A-G-C--G-A-A-C-G-C--T-G-G-C--G-G--C-A-T-G---C---C-T--AA-C--AC-A-C-G-C--A-A-G--T-C--GA-A-CG-A---------G-A-----------------------------------------------C-C--------------------TTC-G---------------------------G--G------------------------------------------TC--T-------AG-T-G-G-C-GC-A--C--G-GG--T--G-C-G-T-A-AC-G-C-G-T-G-GG---A-A-T-CC-G--C-C-CTT--GG-G----T-T-C-G-G-A---AT-AA-C--TC------------------G-C-C-…
>ICSZ4EG01DKXKB
A-T-T--G-A-A-C-G-C--T-G-G-C--G-G--C-G-T-G---C---C-T--AA-C--AC-A-T-G-C--A-A-G--T-C--GA-A-CG-A---------G-A-----------------------------------------------C-C--------------------TTC-G---------------------------G--G------------------------------------------TC--T-------AG-T-G-G-C-GC-A--C--G-GG--T--G-C-G-T-A-AC-G-C-G-T-G-GG---A-A-T-CT-G--C-C-CTT--GG-G----T-T-C-G-G-A---AT-AA-C--TC------------------G-C-C-…
>ICSZ4EG01DHQQK
G-A-T--G-A-A-C-G-C--T-G-G-C--G-G--C-G-T-G---C---T-T--AA-C--AC-A-T-G-C--A-A-G--T-C--GA-G-CG-A---------A-G----C-G--A----------TTTAA-A-----------TG-A-A-G-T-T--------------------TTC-G---------------------------G--A--T-G-G-A--TTT--TGAA------------T-T----GA-CT--G-------AG-C-G-G-C-GG-A--C--G-GG--T--G-A-G-T-A-AC-G-C-G-T-G-GG---TAA-C-CT-G--C-C-TCA--TA-C----A-G-G-G-G-G---AT-AA-C--AG------------------T-T-G-…
>ICSZ4EG01DDKXJ
G-A-C--G-A-A-C-G-C--T-G-G-C--G-G--C-G-T-G---C---T-T--AA-C--AC-A-T-G-C--A-A-G--C-C--GA-G-CG-G---------T-A----T-T--G---------------------------------T-T-T-C--------------------TTC-G---------------------------G--A--A-A---------------------------T-G----A--GA--G-------AG-C-G-G-C-GT-A--C--G-GG--T--G-C-G-G-A-AC-A-C-G-T-G-TG---CAG-C-CT-G--C-C-TTT--AT-C----T-G-G-G-G-G---AT-AG-C--CT------------------T-T-C-…
>ICSZ4EG01DBJDN
A-T-T--G-A-A-C-G-C--T-G-G-C--G-G--C-A-T-G---C---C-T--TA-C--AC-A-T-G-C--A-A-G--T-C--GA-A-CG-----------G---------------------------------------------------C--------------------AAC-G---------------------------G--G------------------------------------------TC--T-------AG-T-G-G-C-GC-A--C--G-GG--T--G-C-G-T-A-AC-G-C-G-T-G-GG---A-A-T-CT-G--C-C-CTT--GG-G----T-T-C-G-G-A---AT-AA-C--TC------------------G-C-C-…
>ICSZ4EG01DA1YW
A-T-T--G-A-A-C-G-C--T-G-G-C--G-G--C-A-T-G---C---C-T--TA-C--AC-A-T-G-C--A-A-G--T-C--GA-A-CG-----------G-TA-----A--C---------------------------------G-G-G----------------------TCC-T---------------------------T--CGGA-T-------------------------G-C-C----G--AC--G-------AG-T-G-G-C-GA-A--C--G-GG--T--G-A-G-T-A-AT-A-T-A-T-C-GG---A-A-C-GT-G--C-C-CAG--TA-G----T-G-G-G-G-G---AT-AA-C--TG------------------C-T-C-…
>ICSZ4EG01D8VOM
A-A-C--G-A-A-T-G-C--T-G-G-C--G-G--C-A-T-G---C---C-T--AA-C--AC-A-T-G-C--A-A-G--T-C--GA-A-CG-A---------A-A-----------------------------------------------C-C--------------------TTC-G---------------------------G--G------------------------------------------TC--T-------AG-C-G-G-C-GC-A--C--G-GG--T--G-C-G-T-A-AC-G-C-G-T-G-GG---A-A-T-CT-G--C-C-CTT--GG-G----T-T-C-G-G-A---AT-AA-C--TC------------------G-C-C-…
>ICSZ4EG01D6E5N
A-A-C--G-A-A-C-G-C--T-G-G-C--G-G--C-A-T-G---C---C-T--TA-C--AC-A-T-G-C--A-A-G--T-C--GA-A-TG-----------G-TA-----A--C---------------------------------G-G-G----------------------TCC-T---------------------------T--C--G-G-------------------------G-A-T----GCCGAC-G-------AG-T-G-G-C-GA-A--C--G-GG--T--G-A-G-T-A-AT-A-T-A-T-C-GG---A-A-C-GT-G--C-C-CAG--TA-G----T-G-G-G-G-G---AT-AA-C--TG------------------C-T-C-…
>ICSZ4EG01D2R8T
A-A-C--G-A-A-C-G-C--T-G-G-C--G-G--C-A-T-G---C---C-T--TA-C--AC-A-T-G-C--A-A-G--T-C--GA-A-CG-----------G-TAA--C-A--G-----------------------------------G-T-C--------------------TTC-G---------------------------G--A--T---------------------------G-C-T----G--AC--G-------AG-T-G-G-C-GA-A--C--G-GG--T--G-A-G-T-A-AT-A-C-A-T-C-GG---A-A-C-GT-G--C-C-C-G-ATC-G----T-G-G-G-G-G---AT-AA-C--GA------------------G-G-C-…
>ICSZ4EG01D293J
A---T--G-A-A-C-G-C--T-G-G-C--G-G--C-G-T-G---C---T-T--AA-C--AC-A-T-G-C--A-A-G--T-C--GA-G-CG-G---------G-C---------------------------------------------G-T-A--------------------GCA-A---------------------------T--A--C---------------------------------------GT--C-------AG-C-G-G-C-AG-A--C--G-GG--T--G-A-G-T-A-AC-G-C-G-T-G-GG---A-A-C-GT-A--C-C-TTT--TG-G----T-T-C-G-G-A---AC-AA-C--AC------------------A-G-G-…
>ICSZ4EG01D0G6U
G-A-T--G-A-A-C-G-C--T-G-G-C--G-G--C-G-T-G---C---C-T--AA-C--AC-A-T-G-C--A-A-G--T-C--GA-A-CG-A---------A-CC---G-C--A----------------------------AC-T-T-G-A-A--------------------CTT-G------------------------------T--T-C-TGG--T------------------T-A-A----G--GT--T-------AG-T-G-G-C-GC-A--C--G-GG--T--G-A-G-T-A-AC-A-C-G-T-G-GG---GAA-C-CC-G--C-C-CTT--TA-G----T-G-G-G-G-G---AT-AA-C--AG------------------T-C-G-…
>ICSZ4EG01CXGZ5
G-A-C--G-A-A-C-G-C--T-G-G-C--G-G--C-G-T-G---C---C-T--AA-C--AC-A-T-G-C--A-A-G--T-C--GA-A-CG-A---------G-A-----------------------------------------------C-C--------------------TTC-G---------------------------G--G------------------------------------------TC--T-------AG-T-G-G-C-GC-A--C--G-GG--T--G-C-G-T-A-AC-G-C-G-T-G-GG---A-A-T-CT-G--C-C-CTT--GG-G----T-T-C-G-G-A---AT-AA-C--TC------------------G-C-C-…
>ICSZ4EG01CV7OB
A-T-T--G-A-A-C-G-C--T-G-G-C--G-G--C-A-T-G---C---C-T--TA-C--AC-A-T-G-C--A-A-G--T-C--GA-A-CG-----------G-TAA--C-A--G-----------------------------------G-T-C--------------------TTCGG---------------------------G--AT-T---------------------------G-C-T----G--AC--G-------AG-T-G-G-C-GA-A--C--G-GG--T--G-A-G-T-A-AT-A-C-A-T-C-GG---A-A-C-GT-G--C-C-CAG--GC-G----T-G-G-G-G-G---AT-AA-C--GA------------------G-G-C-…
>ICSZ4EG01CTG8L
A-T-T--G-A-A-C-G-C--T-G-G-C--G-G--C-A-T-G---C---C-T--TA-C--AC-A-T-G-C--A-A-G--T-C--GA-A-CG-----------G-TA-----A--C---------------------------------G-G-G----------------------TCC-T---------------------------T--C--G-G-------------------------G-A-T----GCCAAC-G-------AG-T-G-G-C-GA-A--C--G-GG--T--A-A-G-T-A-AT-A-T-A-T-C-GG---A-A-C-GT-G--C-C-CAG--TA-G----T-G-G-G-G-G--AGT-AA-C--TG------------------C-T-C-…
>ICSZ4EG01CRSJ5
G-A-T--G-A-A-C-G-C--T-G-G-C--G-G--C-G-T-G---C---T-T--AA-C--AC-A-T-G-C--A-A-G--T-C--GA-A-CG-A---------A-G----C-A--T---------T------TACCAA------GG-A-T-T-T-C--------------------TTC-G---------------------------G--AGTGACTA-A--TA-------A-----------A-T----GA-CT--G-------AG-T-G-G-C-GG-A--C--G-GG--T--G-A-G-T-A-AC-G-C-G-T-G-GG---TAA-C-CT-G--C-C-TTA--CA-C----A-G-G-G-G-G---AC-AA-C--AG------------------C-T-G-…
>ICSZ4EG01CPL08
A-G-C--G-A-A-C-G-C--T-G-G-C--G-G--C-A-G-G---C---T-T--AA-C--AC-A-T-G-C--A-A-G--T-C--GA-A-CG-----------G-TA-----A--C---------------------------------G-G-G----------------------TCC-T---------------------------T--C--G-G-------------------------G-A-T----GCCGAC-G-------AG-T-G-G-C-GA-A--C--G-GG--T--G-A-G-T-A-AT-A-T-A-T-C-GG---A-A-C-GT-G--C-C-CAG--TA-G----T-G-G-G-G-G---AT-AA-C--TG------------------C-T-C-…
>ICSZ4EG01CNBTV
A-A-C--G-A-A-C-G-C--T-G-G-C--G-G--C-A-G-G---C---T-T--AA-C--AC-A-T-G-C--A-A-G--T-C--GA-G-C------------G-C---------------------------------------------C-C-C--------------------GC--A------------------------------A--G---------------------------------------GG--G-------AG-C-G-G-C-AG-A--C--G-GG--T--G-A-G-T-A-AC-G-C-G-T-G-GG---A-A-C-GT-A--C-C-TTT--TG-G----T-T-C-G-G-A---AC-AA-C--AC------------------A-G-G-…
>ICSZ4EG01CN47D
A-A-C--G-A-A-C-G-C--T-G-G-C--G-G--C-A-T-G---C---C-C--AA-C--AC-A-T-G-C--A-A-G--T-C--GA-A-CG-A---------G-A-----------------------------------------------C-C--------------------TTC-G---------------------------G--G------------------------------------------CC--T-------AG-T-G-G-C-GC-A--C--G-GG--T--G-C-G-T-A-AC-G-C-G-T-G-GG---A-A-T-CT-G--C-C-CTT--GG-G----T-T-C-G-G-A---AT-AA-C--CC------------------G-C-C-…
>ICSZ4EG01CMV7S
A-A-C--G-A-A-C-G-C--T-G-G-C--G-G--C-A-T-G---C---C-T--AA-C--AC-A-T-G-C--A-A-G--T-C--GA-A-CG-A---------G-A-----------------------------------------------C-C--------------------TTC-G---------------------------G--G------------------------------------------TC--T-------AG-T-G-G-C-GC-A--C--G-GG--T--G-C-G-T-A-AC-G-C-G-T-G-GG---A-A-T-CT-G--C-C-CTT--GG-G----T-T-C-G-G-A---AT-AA-C--TC------------------A-C-C-…
>ICSZ4EG01CJDMR
A-A-C--G-A-A-C-G-C--T-G-G-C--G-G--C-A-T-G---C---C-T--AA-C--AC-A-T-G-C--A-A-G--T-C--GG-A-CG-----------G-CGG--C-G--C---------------------------------G-G-G-A--------------------GCA-A---------------------------T--C--C-T-------------------------G-G-C----G--GC--G-------AG-T-G-G-C-GA-A--C--G-GG--T--G-A-G-T-A-AT-A-C-A-T-C-GG---A-A-C-AT-G--T-C-CAG--TA-G----T-G-G-G-G-G---AT-AG-C--CC------------------G-G-C-…
>ICSZ4EG01CI61B
A-T-T--G-A-A-C-G-C--T-G-G-C--G-G--C-A-T-G---C---C-T--TA-C--AC-A-T-G-C--A-A-G--T-C--GA-A-CG-----------G-TAA--C-A--G-----------------------------------G-T-C--------------------TTC-G---------------------------G--A--T---------------------------G-C-T----G--AC--G-------AG-T-G-G-C-GA-A--C--G-GG--T--G-A-G-T-A-AT-A-C-A-T-C-GG---A-A-C-GT-G--C-C-CGA--TC-G----T-G-G-G-G-G--AGT-AA-C--GA------------------A-G-C-…
>ICSZ4EG01CGKHG
A-T-T--G-A-A-C-G-C--T-G-G-C--G-G--C-A-T-G---C---C-T--TA-C--AC-A-T-G-C--A-A-G--T-C--GA-A-CG-----------G-TA-----A--C---------------------------------G-G-G-T--------------------CCT-T---------------------------TGGG--A-T-------------------------G-C-C----G--AC--G-------AG-T-G-G-C-GA-A--C--G-GG--T--G-A-G-T-A-AT-A-T-A-T-C-GG---A-A-C-GT-G--C-C-CAG--TA-G----T-G-G-G-G-G---AT-AA-C--TG------------------C-T-C-…
>ICSZ4EG01CFMWY
A-T-T--G-A-A-C-G-C--T-G-G-C--G-G--C-A-T-G---C---C-T--TA-C--AC-A-T-G-C--A-A-G--T-C--GA-A-CG-----------G-TA-----A--C---------------------------------G-G-G----------------------TCC-T---------------------------T--C--G-G-------------------------G-A-T----GCCAAC-G-------AG-T-G-G-C-GA-A--C--G-GG--T--G-A-G-T-A-AT-A-T-A-T-C-GG---A-A-C-GT-G--C-C-CAG--TA-G----T-G-G-G-G-G--AGT-AA-C--TG------------------C-T-C-…
>ICSZ4EG01CFET2
G-A-T--G-A-A-C-G-C--T-G-G-C--G-G--C-G-T-G---C---T-T--AA-C--AC-A-T-G-C--A-A-G--T-C--GA-A-CG-A---------A-G----C-A--T---------TTACCA-A-----------GG-A-T-T-T-C--------------------TTC-G---------------------------G--A--A-T-G----ACT--AATAA-----------A-T----GA-CT--G-------AG-T-G-G-C-GG-A--C--G-GG--T--G-A-G-T-A-AC-G-C-G-T-G-GG---TAA-C-CT-G--C-C-TTA--CA-C----A-G-G-G-G-G---AC-AA-C--AG------------------C-T-G-…
>ICSZ4EG01CAJPS
G-A-C--G-A-A-C-G-C--T-G-G-C--G-G--C-A-T-G---C---C-T--AA-C--AC-A-T-G-C--A-A-G--T-C--GA-G-CG-A---------G-A-----------------------------------------------C-C--------------------TTC-G---------------------------G--G------------------------------------------TC--T-------AG-T-G-G-C-GC-A--C--G-GG--T--G-C-G-T-A-AC-G-C-G-T-G-GG---A-A-T-CT-G--C-C-CTT--GG-G----T-T-C-G-G-A---AT-AA-C--TC------------------G-C-C-…
>ICSZ4EG01C8O7V
A-T-T--G-A-A-C-G-C--T-G-G-C--G-G--C-A-T-G---C---C-T--TA-C--AC-A-T-G-C--A-A-G--T-C--GA-A-CG-----------G-CAG--C-A--T----------------------------GA-T-C-T-A-G--------------------CTT-G---------------------------C--T--A-G-A-T--T------------------G-A-T----G--GC--G-------AG-T-G-G-C-GA-A--C--G-GG--T--G-G-G-T-A-AT-A-C-A-T-C-GG---A-A-C-GT-G--C-C-CTG--TA-G----T-G-G-G-G-G---AT-AA-C--TA------------------G-T-C-…
>ICSZ4EG01C6R55
G-A-T--G-A-A-C-G-C--T-A-G-C--G-A--C-A-G-G---C---T-T--AA-C--AC-A-T-G-C--A-A-G--T-C--GA-A-CG-A---------G-A-----------------------------------------------C-C--------------------TTC-G---------------------------G--G------------------------------------------TC--T-------AG-T-G-G-C-GC-A--C--G-GG--T--G-C-G-T-A-AC-G-C-G-T-G-GG---A-A-T-CT-G--C-C-CTT--GG-G----T-T-C-G-G-A---AT-AA-C--TC------------------G-C-C-…
>ICSZ4EG01C5KIC
G-T-T--G-G-A-C-G-C--T-G-G-C--G-G--C-A-T-G---C---C-T--TA-C--AC-A-T-G-C--A-A-G--T-C--GA-A-CG-----------G-TAA--C-A--G-----------------------------------G-T-C--------------------TTC-G---------------------------G--A--T---------------------------G-C-T----G--AC--G-------AG-T-G-G-C-GA-A--C--G-GG--T--G-A-G-T-A-AT-A-C-A-T-C-GG---A-A-C-GT-G--C-C-CGA--TC-G----T-G-G-G-G-G---AT-AA-C--GA------------------A-G-C-…
>ICSZ4EG01C47BS
A-A-C--G-A-A-C-G-C--T-G-G-C--G-G--C-A-T-G---C---C-T--AA-C--AC-A-T-G-C--A-A-G--T-C--GA-G-CG-G---------G-C---------------------------------------------A-T-A--------------------GCA-A---------------------------T--A--T---------------------------------------GT--C-------AG-C-G-G-C-AG-A--C--G-GG--T--G-A-G-T-A-AC-G-C-G-T-G-GG---A-A-C-GT-A--C-C-TTT--TG-G----T-T-C-G-G-A---AC-AA-C--TG------------------A-G-G-…
>ICSZ4EG01BZ1C2
A-A-C--G-A-A-C-G-C--T-G-G-C--G-G--C-A-T-G---C---C-T--AA-C--AC-C-C-G-C--A-A-G--T-C--GA-A-CG-A---------G-A-----------------------------------------------C-C--------------------TTC-G---------------------------A--G------------------------------------------TC--T-------AG-T-G-G-C-GC-A--C--G-GG--T--G-C-G-T-A-AC-G-C-G-T-G-GG---A-A-T-CT-G--C-C-CTT--GG-G----T-T-C-G-G-A---AT-AA-C--TC------------------G-C-C-…
>ICSZ4EG01BYXXQ
G-ATT--G-A-A-C-G-C--T-G-G-C--G-G--C-A-T-G---C---C-T--TA-C--AC-A-T-G-C--A-A-G--C-C--GA-G-CG-G---------T-A----T-T--G---------------------------------T-T-T-C--------------------TTC-G---------------------------G--A--A-A---------------------------T-G----A--GA--G-------AG-C-G-G-C-GT-A--C--G-GG--T--G-C-G-G-A-AC-A-C-G-T-G-TG---CAA-C-CT-G--C-C-TTT--AT-C----T-G-G-G-G-G---AT-AG-C--CT------------------T-T-C-…
>ICSZ4EG01BVWNT
A---C--G-A-A-C-G-C--T-G-G-C--G-G--C-A-T-G---C---C-T--TA-C--AC-A-T-G-C--A-A-G--T-C--GA-A-CG-----------G-TA-----A--C---------------------------------G-G-G----------------------TCC-T---------------------------T--C--G-G-------------------------G-A-T----GCCGAC-G-------AG-T-A-G-C-GA-A--C--G-GG--T--G-A-G-T-A-AT-A-T-A-T-C-GG---A-A-C-GT-G--C-C-CAG--TA-G----T-G-G-G-G-G---AT-AA-C--TG------------------C-T-C-…
>ICSZ4EG01BVOCV
A-A-C--G-A-A-C-G-C--T-G-G-C--G-G--C-A-T-G---C---C-T--AA-C--AC-A-T-G-C--A-A-G--T-C--GA-A-CG-A---------A-G-----------------------------------------------G-C--------------------TTC-G---------------------------G--C------------------------------------------CT--T-------AG-T-G-G-C-GC-A--C--G-GG--T--G-C-G-T-A-AC-G-C-G-T-G-GG---A-A-T-CT-G--C-C-CTT--AG-G----T-T-C-G-G-A---AT-AA-C--AG------------------T-T-A-…
>ICSZ4EG01BVM5S
A-T-T--G-A-A-C-G-C--T-G-G-C--G-G--C-A-T-G---C---C-T--TA-C--AC-A-T-G-C--A-A-G--T-C--GA-A-CG-----------G-TAA--C-A--G-----------------------------------G-T-C--------------------TTC-G---------------------------G--A--T---------------------------G-C-T----G--AC--G-------AG-T-G-G-C-GA-A--C--G-GG--T--G-A-G-T-A-AT-A-C-A-T-C-GG---A-A-C-GT-G--C-C-CGA--TC-G----T-G-G-G-G-G---AT-AA-C--GA------------------A-G-C-…
>ICSZ4EG01BUZFR
A-A-C--G-A-A-C-G-C--T-G-G-C--G-G--C-A-T-G---C---C-T--AA-C--AC-A-T-G-C--A-A-G--T-C--GA-A-CG-A---------G-A-----------------------------------------------C-C--------------------TTC-A---------------------------G--G------------------------------------------TC--T-------AG-T-G-G-C-GC-A--C--G-GG--T--G-C-G-T-A-AC-G-C-G-T-G-GG---A-A-T-CT-G--C-C-CTT--GG-G----T-T-C-G-G-A---GT-AA-C--TC------------------G-C-C-…
>ICSZ4EG01BRNJK
A---C--G-A-A-C-G-C--T-G-G-C--G-G--C-A-T-G---C---C-T--TA-C--AC-A-T-G-C--A-A-G--T-C--GA-A-CG-----------G-TA-----A--C---------------------------------G-G-G----------------------TCC-T---------------------------T--C--G-G-------------------------G-A-T----GCCGAC-G-------AG-T-G-G-C-GA-A--C--G-GG--T--G-A-G-T-A-AT-A-T-A-C-C-GG---A-A-C-GT-G--C-C-CAG--TA-G----T-G-G-G-G-G---AT-AA-C--TG------------------C-T-C-…
>ICSZ4EG01BP8YT
A-A-C--G-A-A-C-G-C--T-G-G-C--G-G--C-A-G-G---C---T-T--AA-C--AC-A-T-G-C--A-A-G--T-C--GA-G-CG-G---------G-C---------------------------------------------A-T-A--------------------GCA-A---------------------------T--A--T---------------------------------------GT--C-------AG-C-G-G-C-AG-A--C--G-GG--T--G-G-G-T-A-AC-G-C-G-T-G-GG---A-A-C-GT-A--C-C-TTT--TG-G----T-T-C-G-G-A---AC-GA-C--TG------------------A-G-G-…
>ICSZ4EG01BMME9
G-A-C--G-A-A-C-G-C--T-G-G-C--G-G--C-G-T-G---C---T-T--AA-C--AC-A-T-G-C--A-A-G--T-C--GA-G-CG-A---------A-G----C-G--A----------TTTAA-A-----------TG-A-A-G-T-T--------------------TTC-G---------------------------G--A--T-G-G-A--TTT--TGAA------------T-T----GA-CT--G-------AG-C-G-G-C-GG-A--C--A-GG--T--G-A-G-T-A-AC-G-C-G-T-G-GG---TAA-C-CT-G--C-C-TCA--TA-C----A-G-G-G-G-G---AT-AA-C--AG------------------T-T-G-…
>ICSZ4EG01BM1JJ
A-A-C--G-A-A-C-G-C--T-G-G-C--G-G--C-A-T-G---C---C-T--AA-C--AC-A-T-G-C--A-A-G--T-C--GA-A-CG-----------G-TAA--C-A--G-----------------------------------G-T-C--------------------TTC-G---------------------------G--A--T---------------------------G-C-T----G--AC--G-------AG-T-G-G-C-GA-A--C--G-GG--T--G-A-G-T-A-AT-A-C-A-T-C-GG---A-A-C-GT-G--C-C-CGA--TC-G----T-G-G-G-G-G---AT-AA-C--GA------------------A-G-C-…
>ICSZ4EG01BKQSA
A-T-T--G-A-A-C-G-C--T-G-G-C--G-G--C-A-T-G---C---C-T--TA-C--AC-A-T-G-C--A-A-G--T-C--GA-A-CG-----------G-CA-----A--C---------------------------------G-G-G----------------------TCC-T---------------------------T--C--G-G-------------------------G-A-T----GCCGAC-G-------AG-T-G-G-C-GA-A--C--G-GG--T--G-A-G-T-A-AT-A-T-A-T-C-GG---A-A-C-GT-G--C-C-CAG--TA-G----T-G-G-G-G-G---AT-AA-C--TG------------------C-T-C-…
>ICSZ4EG01BJPQG
A-A-C--G-A-A-C-G-C--T-G-G-C--G-G--C-A-T-G---C---C-T--AA-C--AC-A-T-G-C--A-A-G--T-C--GA-A-CG-A---------G-A-----------------------------------------------C-C--------------------TTC-G---------------------------G--G------------------------------------------TC--T-------AG-T-G-G-C-GC-A--C--G-GG--T--G-C-G-T-A-AC-G-C-G-T-G-GG---A-A-T-CT-G--C-C-CTT--GG-G----T-T-C-G-G-A---AT-AA-C--TC------------------G-C-C-…
>ICSZ4EG01BD27I
A-T-C--G-A-A-C-G-C--T-G-G-C--G-G--C-A-T-G---C---C-T--TA-C--AC-A-T-G-C--A-A-G--T-C--GA-A-CG-----------G-TA-----A--C---------------------------------G-G-G----------------------TCC-T---------------------------T--C--G-G-------------------------G-A-T----GCCAAC-G-------AG-T-G-G-C-GA-A--C--G-GG--T--G-A-G-T-A-AT-A-T-A-T-C-GG---A-A-C-GT-G--C-C-CAG--TA-G----T-G-G-G-G-G---AT-AA-C--TG------------------C-T-C-…
>ICSZ4EG01B8JMY
A-A-C--G-A-A-C-G-C--T-G-G-C--G-G--C-A-T-G---C---C-T--AA-C--AC-A-T-G-C--A-A-G--T-C--GA-A-CG-C---------T-C---------------------------------------------G-T-C--------------------TTC-G---------------------------G--A--C---------------------------------------GG--G-------AG-T-G-G-C-AG-A--C--G-GG--T--G-A-G-T-A-AC-A-C-G-T-G-GG---A-A-C-GT-A--C-C-CTT--TG-G----T-T-C-G-G-A---AT-AA-C--GC------------------A-G-G-…
>ICSZ4EG01B7R9J
A-T-T--G-A-A-C-G-C--T-G-G-C--G-G--C-A-T-G---C---C-T--TA-C--AC-A-T-G-C--A-A-G--T-C--GA-A-CG-----------G-TAA--C-A--G-----------------------------------G-T-C--------------------TTC-G---------------------------G--A--T---------------------------A-C-T----G--AC--G-------AG-T-G-G-C-GA-A--C--G-GG--T--G-A-G-T-A-AT-A-C-A-T-C-GG---A-A-C-GT-G--C-C-CGA--TC-G----T-G-G-G-G-G---AT-AA-C--GA------------------A-G-C-…
>ICSZ4EG01A5P7I
A-T-T--G-A-A-C-G-C--T-G-G-C--G-G--C-A-T-G---C---C-T--TA-C--AC-A-T-G-C--A-A-G--T-C--GA-A-CG-----------G-TAA--C-G--G-----------------------------------G-TCC--------------------TTCGG---------------------------G--A--T---------------------------G-C-C----G--AC--G-------AG-T-G-G-C-GA-A--C--G-GG--T--G-A-G-T-A-AT-A-T-A-T-C-GG---A-A-C-GT-G--C-C-CAG--TA-G----T-G-G-G-A-G---AT-AA-C--TG------------------C-T-C-…
>ICSZ4EG01B6LN9
A-A-C--G-A-A-C-G-C--C-G-G-C--G-G--C-A-T-G---C---C-T--AA-C--AC-A-T-G-C--A-A-G--T-C--GA-A-CA-A---------G-A-----------------------------------------------C-C--------------------TTC-G---------------------------G--G------------------------------------------TC--T-------AG-T-G-G-C-GC-A--C--G-GG--T--G-C-G-T-A-AC-G-C-G-T-G-GG---A-A-T-CT-G--C-C-CTT--GG-G----T-T-C-G-G-A---AT-AA-C--TC------------------G-C-C-…
>ICSZ4EG02HL0WJ
A-A-C--G-A-A-C-G-C--T-G-G-C--G-G--C-A-T-G---C---C-T--AA-C--AC-A-T-G-C--A-A-G--T-C--GA-A-CG-A---------A-G-----------------------------------------------G-C--------------------TTC-G---------------------------G--C------------------------------------------CT--T-------AG-T-G-G-C-GC-A--C--G-GG--T--G-C-G-T-A-AC-G-C-G-T-G-GG---A-A-T-CT-G--C-C-CTT--AG-G----T-T-C-G-G-A---AT-AA-C--AG------------------T-T-A-…
>ICSZ4EG01B40P2
A-T-T--G-A-A-C-G-C--T-G-G-C--G-G--C-A-T-G---C---C-T--TA-C--AC-A-T-G-C--A-A-G--T-C--GA-A-CG-----------G-CA-----A--C---------------------------------G-G-G----------------------TCC-T---------------------------T--C--G-G-------------------------G-A-T----GCCGAC-G-------AG-T-G-G-C-GA-A--C--G-GG--T--G-A-G-T-A-AT-A-T-A-T-C-GG---A-A-C-GT-G--C-C-TAG--TA-G----T-G-G-G-G-G---AT-AA-C--TG------------------C-T-C-…
>ICSZ4EG01B08NR
A-T-T--G-A-A-C-G-C--T-G-G-C--G-G--C-A-T-G---C---C-T--TA-C--AC-A-T-G-C--A-A-G--T-C--GA-A-CG-----------G-TAA--C-A--G-----------------------------------G-T-C--------------------TTC-G---------------------------G--A--T---------------------------G-C-T----G--AC--G-------AG-T-G-G-C-GA-A--C--G-GG--T--G-A-G-T-A-AT-A-C-A-T-C-GG---A-A-C-GT-G--C-C-CAG--GC-G----T-G-G-G-G-G---AT-AA-C--GA------------------G-G-C-…
>ICSZ4EG01AUN6C
A-A-C--G-A-A-C-G-C--T-G-G-C--G-G--C-A-G-G---C---T-T--AA-C--AC-A-T-G-C--A-A-G--T-C--GA-G-CG-----------G-TA-----A--C---------------------------------G-G-G----------------------TCC-T---------------------------T--C--G-G-------------------------G-A-T----GCCGAC-G-------AG-T-G-G-C-GA-A--C--G-GG--T--G-A-G-T-A-AT-A-T-A-T-C-GG---A-A-C-GT-G--C-C-CAG--TA-G----T-G-G-G-G-G---AT-AA-C--TG------------------C-T-C-…
>ICSZ4EG01AS2TQ
A-A-C--G-A-A-C-G-C--T-G-G-C--G-G--C-A-T-G---C---C-T--TA-C--AC-A-T-G-C--A-A-G--T-C--GA-A-CG-----------G-CAG--C-A--C---------------------------------G-G-A-C--------------------TTC-G---------------------------G--T--C-T-------------------------G-G-T----G--GC--G-------AG-T-G-G-C-GA-A--C--G-GG--T--G-A-G-T-A-AT-G-T-A-T-C-GG---A-A-C-GT-A--C-C-TTT--CA-G----T-G-G-G-G-G---AT-AA-C--GT------------------A-G-C-…
>ICSZ4EG01ANQIC
G-A-T--G-A-A-C-G-C--T-A-G-C--G-A--C-A-G-G---C---T-T--AA-C--AC-A-T-G-C--A-A-G--T-C--GA-G-GG-----------G-CAG--C-G--G----------------G-----------GC-GAG-T------------------------GCTTG------------------------------C--A-C-TCG--CT-----------------G-C-C----G--GC--G-------AC-C-G-G-C-GC-A--C--G-GG--T--G-A-G-T-A-AC-A-C-G-T-A-TG---GAA-C-CT-G--C-C-CGC--AG-C----A-G-G-G-G-G---AT-AA-G--CG------------------G-A-A-…
>ICSZ4EG01BYUMP
A-T-T--G-A-A-C-G-C--T-G-G-C--G-G--C-A-T-G---C---C-T--TA-C--AC-A-T-G-C--A-A-G--T-C--GA-A-CG-----------G-TAA--C-A------------------------------------G-G-T-C--------------------TTC-G---------------------------G-----A-T-------------------------G-C-T----G--AC--G-------AG-T-G-G-C-GA-A--C--G-GG--T--G-A-G-T-A-AT-G-T-A-T-C-GG---A-A-C-GT-A--C-C-TTT--CA-G----T-G-G-G-G-G---AT-AA-C--GT------------------A-G-C-…
>ICSZ4EG01AG3J5
G-T-T--G-A-A-C-G-C--T-G-G-C--G-G--C-A-T-G---C---C-T--TA-C--AC-A-T-G-C--A-A-G--T-C--GA-A-CG-----------G-TAA--C-A--G-----------------------------------G-T-C--------------------TTC-G---------------------------G--A--T---------------------------G-C-T----G--AC--G-------AG-T-G-G-C-GA-A--C--G-GG--T--G-A-G-T-A-AT-A-C-A-T-C-GG---A-A-C-GT-G--C-C-CGA--TC-G----T-G-G-G-A-G---AT-AA-C--GA------------------G-G-C-…
>ICSZ4EG01AFS17
A-A-C--G-A-A-C-G-C--T-G-G-C--G-G--C-A-T-G---C---C-T--AA-C--AC-A-T-G-C--A-A-G--T-C--GA-A-CG-A---------G-A-----------------------------------------------C-C--------------------TTC-G---------------------------G--G------------------------------------------TC--T-------AG-T-G-G-C-GC-A--C--G-GG--T--G-C-G-T-A-AC-G-C-G-T-G-GG---A-A-T-CT-G--C-C-CTT--GG-G----T-T-C-G-G-A---AT-AA-C--TC------------------G-C-C-…
>ICSZ4EG01AF54M
A-A-C--G-A-A-C-G-C--T-G-G-C--G-G--C-A-G-G---C---T-T--AA-C--AC-A-T-G-C--A-A-G--T-C--GA-A-CG-A---------G-A-----------------------------------------------C-C--------------------TTC-----------------------------G--G------------------------------------------TC--T-------AG-T-G-G-C-GC-A--C--A-GG--T--G-C-G-T-A-AC-G-C-G-T-G-GG---A-A-T-CT-G--C-C-CTT--GG-G----T-T-C-G-G-A---AT-AA-C--TC------------------G-C-C-…
>ICSZ4EG01A7XPL
G-A-T--G-A-A-C-G-C--T-G-G-C--G-G--C-G-T-G---C---C-T--AA-C--AC-A-T-G-C--A-A-G--T-C--GA-A-CG-G---------A-G---------C----------CTA-A-T-----------CA-G-CAGAA-GCGGCCAG-------------CTT-G----------CTGAAAG----------C--G--G-A-A-G--C-A--GAAA------------A-G----G--CT--T-------AG-T-G-G-C-GG-A--C--G-GG--T--G-A-G-T-A-AC-G-C-G-T-G-GG---TAA-C-CT-G--G-C-CCA--TA-C----A-G-G-G-G-G---AT-AA-C--AC------------------T-T-A-…
>ICSZ4EG01A6W32
A-A-C--G-A-A-C-G-C--T-G-G-C--G-G--C-A-T-G---C---C-T--AA-C--AC-A-T-G-C--A-A-G--T-C--GA-A-CG-----------G-CAG--C-A--T----------------------------GA-T-C-T-A-G--------------------CTT-G---------------------------C--T--A-G-A-T--T------------------G-A-T----G--GC--G-------AG-T-G-G-C-GA-A--C--G-GG--T--G-A-G-T-A-AT-A-C-A-T-C-GG---A-A-C-GT-G--C-C-CTG--TA-G----T-G-G-G-G-G---AT-AA-C--TA------------------G-T-C-…
>ICSZ4EG01EUXB2
A-T-T--G-A-A-C-G-C--T-G-G-C--G-G--C-A-T-G---C---C-T--TA-C--AC-A-T-G-C--A-A-G--T-C--GA-A-CG-----------G-TAA--C-A--G-------------------------------------G----------------------TT--A------------------------------A------------------------------G-C-T----G--AC--G-------AG-T-G-G-C-GA-A--C--G-GG--T--G-A-G-T-A-AT-G-T-A-T-C-GG---A-A-C-GT-G--C-C-CAG--TC-G----T-G-G-G-G-G---AT-AA-C--TG------------------C-T-C-…
>ICSZ4EG01BWODK
G-A-C--G-A-A-C-G-C--T-G-G-C--G-G--T-G-T-G---C---T-T--CA-C--AC-A-T-G-C--A-A-G--T-C--GA-A-CG-A---------G-G-----------------------------------------------T-A--------------------GCA-A---------------------------T--A------------------------------------------CC--T-------AG-T-G-G-C-GG-A--C--G-GG--T--G-A-G-T-A-AC-G-C-G-T-G-GG---A-A-T-CT-G--C-C-TTT--AG-A----T-G-G-G-G-G---AT-AA-C--GG------------------G-C-C-…
>ICSZ4EG01EXS5P
G-A-C--G-A-A-C-G-C--T-G-G-C--G-G--C-G-T-G---C---C-T--AA-T--AC-A-T-G-C--A-A-G--T-C--GA-A-CG-C---------A-T----T-T--T-----------CTTT-C-----------AC-C-G-T-A-G--------------------CTT-G---------------------------C--T--A-C-A-C--CGA--AAG-------------A-A----A--AT--G-------AG-T-G-G-C-GA-A--C--G-GG--T--G-A-G-T-A-AC-A-C-G-T-G-GG---TAA-C-CT-G--C-C-CAT--CA-G----C-G-G-G-G-G---AT-AA-C--AC------------------T-T-G-…
>ICSZ4EG01EQ66T
G-A-T--G-A-A-C-G-C--T-G-G-C--G-G--C-G-T-G---C---T-T--AA-C--AC-A-T-G-C--A-A-G--T-C--GA-ACGGGA---------ATGC---C-A--CG----------CTGA-T-----------GC-G-A---T----------------------TTC-G---------------------------G-----T-C-A-A---AT-CATGT------------G-G----C-ATTC-G-------AG-T-G-G-C-GG-A--C--G-GG--T--G-A-G-T-A-AC-G-C-G-T-G-GG---TAA-C-CT-G--C-C-TTA--CA-C----A-G-G-G-G-G---AT-AA-C--AC------------------C-T-G-…
>ICSZ4EG01A2TZD
A-T-T--G-A-A-C-G-C--T-G-G-C--G-G--C-A-T-G---C---C-T--TA-C--AC-A-T-G-C--A-A-G--T-C--GA-A-CG-----------G-CAG--C-A--C---------------------------------G-G-G-A--------------------GCA-A---------------------------T--C--C-T-------------------------G-G-T----G--GC--G-------AG-T-G-G-C-GA-A--C--G-GG--T--G-A-G-T-A-AT-A-C-A-T-C-GG---A-A-C-GT-G--C-C-CAG--TA-G----T-G-G-G-G-G---AT-AA-C--CC------------------G-G-C-…
>ICSZ4EG01EUFDI
A-T-T--G-A-A-C-G-C--T-G-G-C--G-G--C-A-T-G---C---C-T--TA-C--AC-A-T-G-C--A-A-G--T-C--GA-A-CG-----------G-TAA--C-G--G-------------------------------------GTCC-------------------TTCGGGA----------------------------T------------------------------G-C-C----G--AC--G-------AG-T-G-G-C-GA-A--C--G-GG--T--G-A-G-T-A-AT-A-T-A-T-C-GG---A-A-C-GT-G--C-C-CAG--TA-G----T-G-G-G-G-G---AT-AA-C--TG------------------C-T-C-…
>ICSZ4EG01CC4U9
G-A-C--G-A-A-C-G-C--T-G-G-C--G-G--C-G-T-G---C---T-T--AA-C--AC-A-T-G-C--A-A-G--T-C--GA-A-CG-G---------G-A----T-C--C------------------------------------GG-G--------------------CTT-T---------------------------C--G--G-G---T-----------------------T-T----G--GT--G-------AGAGTG-G-C-GA-A--C--G-GG--T--G-A-G-T-A-AC-A-C-G-T-G-AG---TAA-C-CT-G--C-C-CCC--TT-C----T-T-T-G-G-G---AT-AA-C--GT------------------C-G-G-…
>ICSZ4EG01EIOCJ
A-A-T--C-A-A-C-G-C--T-G-G-C--G-G--C-G-T-G---C---C-T--CA-G--AC-A-T-G-C--A-A-G--T-C--GA-A-CG-A---------T-T----A-A--A-----------------------------C-T-T-T-C-C--------------------TTC-G---------------------------G--G--G-A-A-G-----------------------A-T----A--TA--A-------AG-T-G-G-C-GC-A--C--G-GG--T--G-A-G-T-A-AC-A-C-G-T-A-GG---TAA-T-GT-A--C-C-TTT--GG-G----T-G-G-G-G-A---AT-AA-C--TT------------------A-G-G-…
>ICSZ4EG01EW6SW
A-T-T--G-A-A-C-G-C--T-G-G-C--G-G--C-A-T-G---C---C-T--TA-C--AC-A-T-G-C--A-A-G--T-C--GA-A-CG-----------G-TA-----A--C---------------------------------A-G-G----------------------TTA-A-------------------------------------------------------------G-C-T----G--AC--G-------AG-T-G-G-C-GA-A--C--G-GG--T--G-A-G-T-A-AT-G-T-A-T-C-GG---A-A-C-GT-G--C-C-CAG--TC-G----T-G-G-G-G-G---AT-AA-C--TG------------------C-T-C-…
>ICSZ4EG01EUIFX
A-T-T--G-A-A-C-G-C--T-G-G-C--G-G--C-A-T-G---C---C-T--TA-C--AC-A-T-G-C--A-A-G--T-C--GA-A-CG-----------G-TA-----A--C---------------------------------A-G-G-T--------------------CTT-C---------------------------G--G--A-T-------------------------G-C-T----G--AC--G-------AG-T-G-G-C-GA-A--C--G-GG--T--G-A-G-T-A-AT-A-C-A-T-C-GG---A-A-C-GT-G--C-C-CGA--TC-G----T-G-G-G-G-G---AT-AA-C--GA------------------G-G-C-…
>ICSZ4EG01CYVUK
A-T-T--G-A-A-C-G-C--T-G-G-C--G-G--C-A-T-G---C---C-T--TA-C--AC-A-T-G-C--A-A-G--T-C--GA-A-CG-----------G-TAA--C-G--G-----------------------------------G-TCC--------------------TTCGG---------------------------G--A--T---------------------------G-C-C----G--AC--G-------AG-T-G-G-C-GA-A--C--G-GG--T--G-A-G-T-A-AT-A-T-A-T-C-GG---A-A-C-GT-G--C-C-CAG--TA-G----T-G-G-G-G-G---AT-AA-C--TG------------------C-T-C-…
>ICSZ4EG01ES9M5
A-T-T--G-A-A-C-G-C--T-A-G-C--G-G--G-A-T-G---C---C-T--TA-C--AC-A-T-G-C--A-A-G--T-C--GA-A-CG-----------G-CAG--C-A--C---------------------------------G-G-A-C--------------------TTC-G---------------------------G--T--C-T-------------------------G-G-T----G--GC--G-------AG-T-G-G-C-GA-A--C--G-GG--T--G-A-G-T-A-AT-G-T-A-T-C-GG---A-A-C-GT-G--C-C-TAG--TA-G----C-G-G-G-G-G---AT-AA-C--TA------------------C-G-C-…
>ICSZ4EG01EKHJA
A-T-T--G-A-A-C-G-C--T-G-G-C--G-G--C-A-T-G---C---C-T--TA-C--AC-A-T-G-C--A-A-G--T-C--GA-A-CG-----------G-TAA--C-G--G-----------------------------------G-TCC--------------------TTC-G---------------------------G--A--T---------------------------G-C-T----G--AC--G-------AG-T-G-G-C-GA-A--C--G-GG--T--G-A-G-T-A-AT-A-C-A-T-C-GG---A-A-C-GT-G--C-C-CGA--TC-G----T-G-G-G-G-G---AT-AA-C--GA------------------A-G-C-…
>ICSZ4EG01EAI47
A-T-T--G-A-A-C-G-C--T-G-G-C--G-G--C-A-T-G---C---C-T--TA-C--AC-A-T-G-C--A-A-G--T-C--GA-G-CG-----------G-TAA--C-A--G-----------------------------------G-T-C--------------------TTC-G---------------------------G--A--T---------------------------G-C-T----G--AC--G-------AG-T-G-G-C-GA-A--C--G-GG--T--G-A-G-T-A-AT-A-C-A-T-C-GG---A-A-C-GT-G--C-C-CGA--TC-G----T-G-G-G-G-G---AT-AA-C--GA------------------G-G-C-…
>ICSZ4EG01DAEZX
A-A-C--G-A-A-C-G-C--T-G-G-C--G-G--C-A-T-G---C---C-T--TA-C--AC-A-T-G-C--A-A-G--T-C--GA-A-CG-----------G-TAA--C-A--G-----------------------------------G-T-C--------------------TTC-G---------------------------G--A--T---------------------------G-C-T----G--AC--G-------AG-T-G-G-C-GA-A--C--G-GG--T--G-A-G-T-A-AT-A-C-A-T-C-GG---A-A-C-GT-G--C-C-CGA--TC-G----T-G-G-G-G-G---AT-AA-C--GA------------------A-G-C-…
>ICSZ4EG01B664P
G-A-T--G-A-A-C-G-C--T-G-G-C--G-G--C-G-T-G---C---T-T--AA-C--AC-A-T-G-C--A-A-G--T-C--GA-A-CG-A---------T-G----A-A--G-----------------------------C-C---C-A-G--------------------CTT-G---------------------------C--T--G---G-G-----------------------T-G----G--AT--T-------AG-T-G-G-C-GA-A--C--G-GG--T--G-A-G-T-A-AC-A-C-G-T-G-AG---TAA-C-CT-G--C-C-CTT--AA-C----T-C-T-G-G-G---AT-AA-G--CC------------------T-G-G-…
>ICSZ4EG01DTI2W
A-T-T--G-A-A-C-G-C--T-G-G-C--G-G--C-A-T-G---C---C-T--TA-C--AC-A-T-G-C--A-A-G--T-C--GA-A-CG-----------G-TAA--C-A--G-----------------------------------G-T-C--------------------TTC-G---------------------------G--A--T---------------------------G-C-T----G--AC--G-------AG-T-G-G-C-GA-A--C--G-GG--T--G-A-G-T-A-AT-A-C-A-T-C-GG---A-A-C-GT-G--C-C-C-A---C-G----T-G-G-G-G-G---AT-AA-C--GA------------------A-G-C-…
>ICSZ4EG01DAI2C
A-T-T--G-A-A-C-G-C--T-G-G-C--G-G--C-A-T-G---C---C-T--TA-C--AC-A-T-G-C--A-A-G--T-C--GA-A-CG-----------G-TAA--C-A--G-----------------------------------G-T-C--------------------TTC-G---------------------------G--A--T---------------------------G-C-T----G--AC--G-------AG-T-G-G-C-GA-A--C--G-GG--T--G-A-G-T-A-AT-A-C-A-T-C-GG---A-A-C-GT-G--C-C-CGA--TC-G----T-G-G-G-G-G---AT-AA-C--GA------------------A-G-C-…
>ICSZ4EG01D610D
A-T-T--G-A-A-C-G-C--T-G-G-C--G-G--C-A-T-G---C---C-T--TA-C--AC-A-T-G-C--A-G-G--T-C--GA-A-CG-----------G-TAA--C-A--G-----------------------------------G-T-C--------------------TTC-G---------------------------G--A--T---------------------------G-C-T----G--AC--G-------AG-T-G-G-C-GA-A--C--G-GG--T--G-A-G-T-A-AT-A-C-A-T-C-GG---A-A-C-GT-G--C-C-CGA--TC-G----T-G-G-G-G-G---AT-AA-C--GA------------------A-G-C-…
>ICSZ4EG01CPI8H
G-A-C--G-A-A-C-G-C--T-G-G-C--G-G--C-G-T-G---C---T-T--AA-C--AC-A-T-G-C--A-A-G--T-C--GA-A-CG-----------G-AA---A-G--G-----------------------------C-C-C-T-G-C--------------------TTT-T---------------------------G--T--G-G-G-G-----------------------T-G----C--TC--G-------AG-T-G-G-C-GA-A--T--G-GG--T--G-A-G-T-A-AC-A-C-G-T-G-AG---TAA-C-CT-G--C-C-CTT--GA-C----T-T-T-G-G-G---AT-AA-C--TT------------------C-A-G-…
>ICSZ4EG01CYKPB
A-T-T--G-A-A-C-G-C--T-G-G-C--G-G--C-A-T-G---C---C-T--TA-C--AC-A-T-G-C--A-A-G--T-C--GA-A-CG-----------G-TAA--CGG--G-------------------------------------TCC--------------------TTCGG---------------------------G--A--T---------------------------G-C-C----G--AC--G-------AG-T-G-G-C-GA-G--C--G-GG--T--G-A-G-T-A-AT-A-T-A-T-C-GG---A-A-C-GT-G--C-C-CAG--TA-G----T-G-G-G-G-G---AT-AA-C--GA------------------G-G-C-…
>ICSZ4EG01BZE8N
G-A-T--G-A-A-C-G-C--T-G-G-C--G-G--C-A-T-G---C---T-T--AA-C--AC-A-T-G-C--A-A-G--T-C--GG-A-CG-G---------G-A-----------------------------------------------A-G-------------------TGGT-G---------------------------T--T------------------------------------------TC--C-------AG-T-G-G-C-GC-A--C--G-GG--T--G-C-G-T-A-AC-G-C-G-T-G-GG---A-A-T-CT-G--C-C-CTT--GG-G----T-T-C-G-G-A---AT-AA-C--TC------------------G-C-C-…
>ICSZ4EG01C5A3G
G-A-T--G-A-A-C-G-C--T-A-G-C--T-A--C-A-G-G---C---T-T--AA-C--AC-A-T-G-C--A-A-G--T-C--GA-G-GG-----------G-CAG--C-A--T----------------G-----------TC-G-G-T-T-G--------------------CTT-G---------------------------C--A--A-C-C-G--AT-----------------G-A-T----G--GC--G-------AC-C-G-G-C-GC-A--C--G-GG--T--G-A-G-T-A-AC-G-C-G-T-A-TC---CAA-C-CT-G--C-C-TCT--CA-C----C-A-G-G-G-A---AT-AA-C--CC------------------G-T-C-…
>ICSZ4EG01A610H
A-T-T--G-A-A-C-G-C--T-G-G-C--G-G--C-A-T-G---C---C-T--TA-C--AC-A-T-G-C--A-A-G--T-C--GA-A-CG-----------G-TAA--C-G--G-----------------------------------G-TCC--------------------TTCGG---------------------------G--A--T---------------------------G-C-C----G--AC--G-------AG-T-G-G-C-GA-A--C--G-GG--T--G-A-G-T-A-AT-A-T-A-T-C-GG---A-A-C-GT-G--C-C-CGA--TC-G----T-G-G-G-G-G---AT-AA-C--GA------------------A-G-C-…
>ICSZ4EG01B28UF
A---T--G-A-A-C-G-C--T-G-G-C--G-G--C-A-T-G---C---T-T--AA-C--AC-A-T-G-C--A-A-G--T-C--GA-A-CG-----------G-TAA--C-A--G-----------------------------------G-T-C--------------------TTC-G---------------------------G--A--T---------------------------G-C-T----G--AC--G-------AG-T-G-G-C-GA-A--C--G-GG--T--G-A-G-T-A-AT-A-C-A-T-C-GG---A-A-C-GT-G--C-C-CGA--TC-G----T-G-G-G-G-G---AT-AA-C--GA------------------A-G-C-…
>ICSZ4EG01EXQ2Z
A-T-T--G-A-A-C-G-C--T-G-G-C--G-G--C-A-C-G---C---C-T--TA-C--AC-A-T-G-C--A-A-G--T-C--GA-A-CG-----------G-TAA--C-A--G-----------------------------------G-T-C--------------------TTC-G---------------------------G--A--T---------------------------G-C-T----G--AC--G-------AG-T-G-G-C-GA-A--C--A-GG--T--G-A-G-T-A-AT-A-C-A-T-C-GG---A-A-C-GT-G--C-C-CGA--TC-G----T-G-G-G-G-G---AT-AA-C--GA------------------G-G-C-…
>ICSZ4EG01EVV19
A-T-T--G-A-A-C-G-C--T-G-G-C--G-G--C-A-T-G---C---C-T--TA-C--AC-A-T-G-C--A-A-G--T-C--GA-A-CG-----------G-TAA--C-A--G-----------------------------------G-T-C--------------------TTC-G---------------------------G--A--T---------------------------G-C-T----G--AC--G-------AG-T-G-G-C-GA-A--C--G-GG--T--G-A-G-T-A-AT-A-C-A-T-C-GG---A-A-C-GT-G--C-C-CGA--TC-G----T-G-G-G-G-G---AT-AA-C--GA------------------A-G-C-…
>ICSZ4EG01ETJMW
A-T-T--G-A-A-C-G-C--T-G-G-C--G-G--C-A-T-G---C---C-T--TA-C--AC-A-T-G-C--A-A-G--T-C--GA-A-CG-----------G-TAA--CGA--G-------------------------------------G----------------------TT--A------------------------------A------------------------------G-C-T----G--AC--G-------AG-C-G-G-C-GA-A--C--G-GG--T--G-A-G-T-A-AT-G-T-A-T-C-GG---A-A-C-GT-G--C-C-CAG--TC-G----T-G-G-G-G-G--AGT-AA-C--TG------------------C-T-C-…
>ICSZ4EG01ESHWQ
A-T-T--G-A-A-C-G-C--T-G-G-C--G-G--C-A-T-G---C---C-T--TA-C--AC-A-T-G-C--A-A-G--T-C--GA-A-CG-----------G-TA-----A--C---------------------------------G-G-G----------------------TCC-T---------------------------T--CGGGAT-------------------------G-C-T----G--AC--G-------AG-T-G-G-C-GA-A--C--G-GG--T--G-A-G-T-A-AT-A-T-A-T-C-GG---A-A-C-GT-G--C-C-CAG--TA-G----T-G-G-G-G-G---AT-AA-C--TG------------------C-T-C-…
>ICSZ4EG01EP9K0
A-T-T--G-A-A-C-G-C--T-A-G-C--G-G--G-A-T-G---C---C-T--TA-C--AC-A-T-G-C--A-A-G--T-C--GA-A-CG-----------G-CAG--C-A--C---------------------------------G-G-A-C--------------------TTC-G---------------------------G--T--C-T-------------------------G-G-T----G--GC--G-------AG-T-G-G-C-GA-A--C--G-GG--T--G-A-G-T-A-AT-G-T-A-T-C-GG---A-A-C-GT-G--C-C-TAG--TA-G----C-G-G-G-G-G---AT-AA-C--TA------------------C-G-C-…
>ICSZ4EG01EOUWK
A-G-C--G-A-A-C-G-C--T-G-G-C--G-G--C-A-G-G---C---T-T--AA-C--AC-A-T-G-C--A-A-G--T-C--GA-A-CG-G---------G-C---------------------------------------------A---C--------------------TTC-G---------------------------G-----T---------------------------------------GC--T-------AG-T-G-G-C-AG-A--C--G-GG--T--G-A-G-T-A-AC-A-C-G-T-G-GG---A-A-C-GT-A--C-C-TTT--CG-G----T-T-C-G-G-A---AT-AA-T--TC------------------A-G-G-…
>ICSZ4EG01EO9J9
A-T-T--G-A-A-C-G-C--T-G-G-C--G-G--C-A-T-G---C---C-T--TA-C--GC-A-T-G-C--A-A-G--T-C--GA-A-CG-----------G-TAA--C-A--G-----------------------------------G-T-C--------------------TTC-G---------------------------G--A--C---------------------------G-C-T----G--AC--G-------AG-T-G-G-C-GA-A--C--G-GG--T--G-A-G-T-A-AT-A-C-A-T-C-GG---A-A-C-GT-G--C-C-CGA--TC-G----T-G-G-G-G-G---AT-AA-C--GA------------------A-G-C-…
>ICSZ4EG01DTY1Y
A-T-T--G-A-A-C-G-C--T-G-G-C--G-G--C-A-T-G---C---C-T--TA-C--AC-A-T-G-C--A-A-G--T-C--GA-A-CG-----------G-TAA--C-A--G-----------------------------------G------------------------TT---------------------------------A--A---------------------------G-C-T----G--AC--G-------AG-T-G-G-C-GA-A--C--G-GG--T--G-A-G-T-A-AT-G-T-A-T-C-GG---A-A-C-GT-G--C-C-CGA--TC-G----T-G-G-G-G-G---AT-AA-C--GA------------------G-G-C-…
>ICSZ4EG01ELZ0Q
A---T--G-A-A-C-G-C--T-G-G-C--G-G--C-A-T-G---C---C-T--TA-C--AC-A-T-G-C--A-A-G--T-C--GA-A-CG-----------G-TAA--C-A--G-----------------------------------G-T-C--------------------TTC-G---------------------------G--A--T---------------------------G-C-T----G--AC--G-------AG-C-G-G-C-GA-A--C--G-GG--T--G-A-G-T-A-AT-A-C-A-T-C-GG---A-A-C-GT-G--C-C-CGA--TC-G----T-G-G-G-G-G---AT-AA-C--GA------------------A-G-C-…
>ICSZ4EG01ELUQZ
A-T-T--G-A-A-C-G-C--T-G-G-C--G-G--C-A-T-G---C---C-T--TA-C--AC-A-T-G-C--A-A-G--T-C--GA-A-CG-----------G-TAA--C-A--G-----------------------------------G-T-C--------------------TTC-G---------------------------G--A--T---------------------------G-C-T----G--AC--G-------AG-T-G-G-C-GA-A--C--G-GG--T--G-A-G-T-A-AT-A-C-A-T-C-GG---G-A-C-GT-G--C-C-CGA--TC-G----T-G-G-G-G-G---AT-AA-C--GG------------------A-G-C-…
>ICSZ4EG01CP0EM
G-ATT--G-A-A-C-G-C--T-G-G-C--G-G--C-A-T-G---C---C-T--TA-C--AC-A-T-G-C--A-A-G--T-C--GA-A-CG-A---------G-G-----------------------------------------------T-A--------------------GCA-A---------------------------T--A------------------------------------------CC--T-------AG-T-G-G-C-GG-A--C--G-GG--T--G-A-G-T-A-AC-G-C-G-T-G-GG---A-A-T-CT-G--C-C-TTT--AG-A----T-G-G-G-G-G---AT-AA-C--GG------------------G-C-C-…
>ICSZ4EG01EJ3NP
A-T-T--G-A-A-C-G-C--T-G-G-C--G-G--C-A-T-G---C---C-T--TA-C--AC-A-T-G-C--A-A-G--T-C--GA-A-CA-----------G-TA-----A--C---------------------------------G-G-G----------------------TCC-T---------------------------T--C--G-G-------------------------G-A-T----GCCGAC-G-------AG-T-G-G-C-GA-A--C--G-GG--T--G-A-G-T-A-AT-A-T-A-T-C-GG---A-A-C-GT-G--C-C-CAG--TA-G----T-G-G-G-G-G--AGT-AA-C--TG------------------C-T-C-…
>ICSZ4EG01EIVEI
A-T-T--G-A-A-C-G-C--T-G-G-C--G-G--C-A-T-G---C---C-T--TA-C--AC-A-T-G-C--A-A-G--T-C--GA-A-CG-----------G-TAA--C-G--G-------------------------------------GTCT-------------------TTCGGGA----------------------------T------------------------------G-C-C----G--AC--G-------AG-T-G-G-C-GA-A--C--G-GG--T--G-A-G-T-A-AT-G-T-A-T-C-GG---A-A-C-GT-G--C-C-CAG--TC-G----T-G-G-G-G-G---AT-AA-C--TG------------------C-T-C-…
>ICSZ4EG01EHPQR
A-T-T--G-A-A-C-G-C--T-G-G-C--G-G--C-A-T-G---C---C-T--TA-C--AC-A-T-G-C--A-A-G--T-C--GA-A-CG-----------G-TA-----A--C---------------------------------G-G-G----------------------TCC-T---------------------------T--C--G-G-------------------------G-A-T----GCCGAC-G-------AG-T-G-G-C-GA-A--C--G-GG--T--G-A-G-T-A-AT-A-T-A-T-C-GG---A-A-C-GT-G--C-C-CAG--TA-G----T-G-G-G-G-G---AT-AA-C--TG------------------C-T-C-…
>ICSZ4EG01EGJQ5
A---T--G-A-A-C-G-C--T-A-G-C--G-G--G-A-G-G---C---C-T--AA-C--AC-A-T-G-C--A-A-G--T-C--GA-A-CG-----------G-TAA--C-A--G-----------------------------------G-T-C--------------------TTC-G---------------------------G--A--T---------------------------G-C-T----G--AC--G-------AG-T-G-G-C-GA-A--C--G-GG--T--G-A-G-T-A-AT-A-C-A-T-C-GG---A-A-C-GT-G--C-C-CGA--TC-G----T-G-G-G-G-G---AT-AA-C--GA------------------A-G-C-…
>ICSZ4EG01EFG5S
G-A-C--G-A-A-C-G-C--T-G-G-C--G-G--C-G-T-G---C---C-T--AA-T--AC-A-T-G-C--A-A-G--C-C--GA-G-CG-G---------T-A----T-T--G---------------------------------T-T-T-C--------------------TTC-G---------------------------G--A--A-A---------------------------T-G----A--GA--G-------AG-C-G-G-C-GT-A--C--G-GG--T--G-C-G-G-A-AC-A-C-G-T-G-TG---CAA-C-CT-G--C-C-TTT--AT-C----T-G-G-G-G-G---AT-AG-C--CT------------------T-T-C-…
>ICSZ4EG01EFBMM
A-T-T--G-A-A-C-G-C--T-G-G-C--G-G--C-A-T-G---C---C-T--TA-C--AC-A-T-G-C--A-A-G--T-C--GA-A-CG-----------G-TAA--C-A--G-----------------------------------G-T-C--------------------TTC-G---------------------------G--A--T---------------------------G-C-T----G--AC--G-------AG-T-G-G-C-GA-A--C--G-GG--T--G-A-G-T-A-AT-A-C-A-T-C-GG---A-A-C-GT-G--C-C-CGA--TC-G----T-G-G-G-G-G---AT-AA-C--GA------------------A-G-C-…
>ICSZ4EG01EF8RR
G-T-T--G-A-A-C-G-C--T-G-G-C--G-G--C-A-T-G---C---C-T--TA-C--AC-A-T-G-C--A-G-G--T-C--GA-A-CG-----------G-TA-----A--C---------------------------------G-G-G----------------------TCC-T---------------------------T--C--G-G-------------------------G-A-T----GCCGAC-G-------AG-T-G-G-C-GA-A--C--G-GG--T--G-A-G-T-A-AT-A-T-G-T-C-GG---A-A-C-GT-G--C-C-CAG--TA-G----T-G-G-G-G-G---AT-AA-C--TG------------------C-T-C-…
>ICSZ4EG01EDHMJ
A-T-T--G-A-A-C-G-C--T-G-G-C--G-G--C-A-T-G---C---C-T--TA-C--AC-A-T-G-C--A-A-G--T-C--GA-A-CG-----------G-TAA--C-G--------------------------------------G-G-T--------------------CCT-T---------------------------CGGGA-T---------------------------G-C-C----G--AC--G-------AG-T-G-G-C-GA-A--C--G-GG--T--G-A-G-T-A-AT-A-T-A-T-C-GG---A-A-C-GT-G--C-C-CAG--TA-G----T-G-G-G-G-G---AT-AA-C--TG------------------C-T-C-…
>ICSZ4EG01EC03M
G-A-C--G-A-A-C-G-C--T-A-G-C--G-G--G-A-G-G---C---C-T--AA-C--AC-A-T-G-C--A-A-G--C-C--GA-G-CG-G---------T-A----T-T--G---------------------------------T-T-T-C--------------------TTC-G---------------------------G--A--A-A---------------------------T-G----G--GA--G-------AG-C-G-G-C-GT-A--C--G-GG--T--G-C-G-G-A-AC-A-C-G-T-G-TG---CAA-C-CT-G--C-C-TTT--AT-C----T-G-G-G-G-G---AT-AG-C--CT------------------T-T-C-…
>ICSZ4EG01EAXF5
A-T-T--G-A-A-C-G-C--T-G-G-C--G-G--C-A-T-G---C---C-C--TA-C--AC-A-T-G-C--A-A-G--T-C--GA-A-CG-----------G-TAA--C-A--G-----------------------------------G-T-C--------------------TTC-G---------------------------G--A--T---------------------------G-C-C----G--AC--G-------AG-T-G-G-C-GA-A--C--G-GG--T--G-A-G-T-A-AT-A-C-A-T-C-GG---A-A-C-GT-G--C-C-CGA--TC-G----T-G-G-G-G-G---AT-AA-C--GA------------------G-G-C-…
>ICSZ4EG01EAPCC
G-A-T--G-A-A-C-G-C--T-A-G-C--G-G--G-A-G-G---C---C-T--AA-C--AC-G-T-G-C--A-A-G--C-C--GA-G-CG-G---------T-A----T-T--G---------------------------------T-T-T-C--------------------TTC-G---------------------------G--G--A-A---------------------------T-G----A--GA--G-------AG-C-G-G-C-GT-A--C--G-GG--T--G-C-G-G-A-AC-A-C-G-T-G-TG---CAA-C-CT-G--C-C-TTT--AT-C----T-G-G-G-G-G---AT-AG-C--CT------------------T-T-C-…
>ICSZ4EG01EA8DF
A-T-T--G-A-A-C-G-C--T-G-G-C--G-G--C-A-T-G---C---C-T--TA-C--AC-A-T-G-C--A-A-G--T-C--GA-A-CG-----------G--GT--A-A--C---------------------------------G-G-G----------------------TCC-T---------------------------T--C--G-G-------------------------G-A-T----GCCGAC-G-------AG-T-G-G-CGGA-A--C--G-GG--T--G-A-G-T-A-AT-A-T-A-T-C-GG---A-A-C-GT-G--C-C-CAG--TAGG----T-G-G-G-G-G---AT-AA-C--TG------------------C-T-C-…
>ICSZ4EG01DYNNS
A-T-T--G-A-A-C-G-C--T-G-G-C--G-G--C-A-T-G---C---C-C--TA-C--AC-A-T-G-C--A-A-G--T-C--GA-A-CG-----------G-TAA--C-A--G-----------------------------------G-T-C--------------------TTC-G---------------------------G--A--T---------------------------G-C-T----G--AC--G-------AG-T-G-G-C-GA-A--C--G-GG--T--G-A-G-T-A-AT-A-T-A-T-C-GG---A-A-C-GT-G--C-C-CAG--TA-G----T-G-G-G-G-G---AT-AA-C--TG------------------C-T-C-…
>ICSZ4EG01DXSFP
A---C--G-A-A-C-G-C--T-G-G-C--G-G--C-G-T-G---C---C-T--TA-C--AC-A-T-G-C--A-A-G--T-C--GA-G-CG-----------G-TAA--C-G--G-------------------------------------GTCC-------------------TTCGGGA----------------------------T------------------------------G-C-C----G--AC--G-------AG-T-G-G-C-GA-A--C--G-GG--T--G-A-G-T-A-AT-A-T-A-T-C-GG---A-A-C-GT-G--C-C-CAG--TA-G----T-G-G-G-G-G---AT-AA-C--TG------------------C-T-C-…
>ICSZ4EG01DVWVE
A-T-T--G-A-A-C-G-C--T-G-G-C--G-G--C-A-T-G---C---C-T--TA-C--AC-A-T-G-C--A-A-G--T-C--GA-A-CG-----------G-TAA--C-G--G-----------------------------------G-TCC--------------------TTCGG---------------------------G--A--T---------------------------G-C-C----G--AC--G-------AG-T-G-G-C-GA-A--C--G-GG--T--G-A-G-T-A-AT-A-C-A-T-C-GG---A-A-C-GT-G--C-C-CGA--TC-G----T-G-G-G-G-G---AT-AA-C--GA------------------A-G-C-…
>ICSZ4EG01DV3ZJ
G-A-T--G-A-A-C-G-C--T-A-G-C--G-G--G-A-G-G---C---C-T--AA-C--AC-A-T-G-C--A-A-G--C-C--GA-G-CG-G---------T-A----T-T--G---------------------------------T-T-T-C--------------------TTC-G---------------------------G--A--A-A---------------------------T-G----A--GA--G-------AG-C-G-G-C-GT-A--C--G-GG--T--G-C-G-T-A-AC-A-C-G-T-G-TG---CAG-C-CT-G--C-C-TTT--AT-C----T-G-G-G-G-A---AT-AG-C--CT------------------T-T-C-…
>ICSZ4EG01DUP8K
A-T-T--G-A-A-C-G-C--T-G-G-C--G-G--C-A-T-G---C---C-T--TA-C--AC-A-T-G-C--A-A-G--T-C--GA-A-CG-----------G-TAA--C-A--G-----------------------------------G-T-C--------------------TTC-G---------------------------G--A--T---------------------------G-C-T----G--AC--G-------AG-T-G-G-C-GA-A--C--G-GG--T--G-A-G-T-A-AT-A-C-A-T-C-GG---A-A-C-GT-G--C-C-CGA--TC-G----T-G-G-G-G-G---AT-AA-C--G-------------------A-G-C-…
>ICSZ4EG01DTJK7
G-A-T--G-A-A-C-G-C--T-A-G-C--G-G--G-A-G-G---C---C-T--AA-C--AC-A-T-G-C--A-A-A--C-C--GA-G-CG-G---------T-A----T-T--G---------------------------------T-T-T-C--------------------TTC-G---------------------------G--A--A-A---------------------------T-G----A--GA--G-------AG-C-G-G-C-GT-A--C--G-GG--T--G-C-G-G-A-AC-A-C-G-T-G-TG---CAA-C-CT-A--C-C-TTT--AT-C----T-G-G-G-G-G---AT-AG-C--CT------------------T-T-C-…
>ICSZ4EG01DT6KJ
A-T-T--G-A-A-C-G-C--T-G-G-C--G-G--C-A-T-G---C---C-T--TA-C--AC-A-T-G-C--A-A-G--T-C--GA-A-CG-----------G-TAA--C-A--G-----------------------------------G-T-C--------------------TTC-G---------------------------G--A--T---------------------------G-C-T----G--AC--G-------AG-T-G-G-C-GA-A--C--G-GG--T--G-A-G-T-A-AT-A-C-A-T-C-GG---A-A-C-GT-G--C-C-CGA--TC-G----T-G-A-G-G-G---AT-AA-C--GA------------------A-G-C-…
>ICSZ4EG01DRK4H
A-A-C--G-A-A-C-G-C--T-G-G-C--G-G--C-A-T-G---C---C-T--AA-T--AC-A-T-G-C--A-A-G--T-C--GA-A-CG-C---------A-T----T-T--T-----------CTTT-C-----------AC-C-G-T-A-G--------------------CTT-G---------------------------C--T--A-C-A-C--CGA--AAG-------------A-A----A--AT--G-------AG-T-G-G-C-GA-A--C--G-GG--T--G-A-G-T-A-AC-A-C-G-T-G-GG---TAA-C-CT-G--C-C-CAT--CA-G----C-G-G-G-G-G---AT-GA-C--AC------------------T-T-G-…
>ICSZ4EG01DRGUL
G-A-T--G-A-A-C-G-C--T-A-G-C--G-G--G-A-G-G---C---C-T--AA-C--AC-A-T-G-C--A-A-G--C-C--GA-G-CG-G---------T-A----T-T--G---------------------------------T-T-T-C--------------------TTC-G---------------------------G--A--A-A---------------------------T-G----A--GA--G-------AG-C-G-G-C-GT-A--C--G-GG--T--G-C-G-G-A-AC-A-C-G-C-G-TG---CAA-C-CT-G--C-C-TTT--AT-C----T-G-G-G-G-G---AT-AG-C--CT------------------T-T-C-…
>ICSZ4EG01DQ8JY
A-T-T--G-A-A-C-G-C--T-G-G-C--G-G--C-A-T-G---C---C-T--TA-C--AC-A-T-G-C--A-A-G--T-C--GA-A-CG-----------G-TAA--C-A--G-----------------------------------G-T-C--------------------TTC-G---------------------------G--A--T---------------------------G-C-T----G--AC--G-------AG-T-G-G-C-GA-A--C--G-GG--T--G-A-G-T-A-AT-A-C-A-T-C-GG---A-A-C-GT-G--C-C-CGA--TC-G----T-G-G-G-G-G---AT-AA-C--GA------------------A-G-C-…
>ICSZ4EG01DM75O
G-ATT--G-A-A-C-G-C--T-G-G-C--G-G--C-A-T-G---C---C-T--TA-C--AC-A-T-G-C--A-A-G--T-C--GA-G-CG-G---------T-A----T-T--G---------------------------------T-T-T-C--------------------TTC-G---------------------------G--A--A-A---------------------------T-G----A--GA--G-------AG-C-G-G-C-GT-A--C--G-GG--T--G-C-G-G-A-AC-A-C-G-T-G-TG---CAA-C-CT-G--C-C-TTT--AT-C----T-G-G-G-G-G---AT-AG-C--CT------------------T-T-C-…
>ICSZ4EG01DLMWJ
A-T-T--G-A-A-C-G-C--T-G-G-C--G-G--C-A-T-G---C---C-T--TA-C--AC-A-T-G-C--A-A-G--T-C--GA-A-CG-----------G-TAA--C-A--G-------------------------------------GTC--------------------TTCGGA-----------------------------T------------------------------G-C-T----G--AC--G-------AG-T-G-G-C-GA-A--C--G-GG--T--G-A-G-T-A-AT-G-T-A-T-C-GG---A-A-C-GT-G--C-C-CAG--TC-G----T-G-G-G-G-G---AT-AA-C--TG------------------C-T-C-…
>ICSZ4EG01DJPUN
G-A-T--G-A-A-C-G-C--T-G-G-C--G-G--C-A-T-G---C---T-T--AA-C--AC-A-T-G-C--A-A-G--C-C--GA-G-CG-G---------T-A----T-T--G---------------------------------T-T-T-C--------------------TTC-G---------------------------G--A--A-A---------------------------T-G----A--GA--G-------AG-C-G-G-C-GT-A--C--G-GG--T--G-C-G-G-A-AC-A-C-G-T-G-TG---CAA-C-CT-G--C-C-TTT--AT-C----T-G-G-G-G-G---AT-AG-C--CT------------------T-T-C-…
>ICSZ4EG01DHM1J
G-A-C--G-A-A-C-G-C--T-G-G-C--G-G--C-G-T-G---C---C-T--AA-T--AC-A-T-G-C--A-A-G--T-C--GA-A-CG-C---------A-T----T-T--T-----------CTTT-C-----------AC-C-G-T-A-G--------------------CTT-G---------------------------C--T--A-C-A-C--CGA--AAG-------------A-A----A--AT--G-------AG-T-G-G-C-GA-A--C--G-GG--T--G-A-G-T-A-AC-A-C-G-T-G-GG---TAA-C-CT-G--C-C-CAT--CA-G----C-G-G-G-G-G---AT-AA-C--AC------------------T-T-G-…
>ICSZ4EG01AK2FO
A-T-T--G-A-A-C-G-C--T-G-G-C--G-G--C-A-T-G---C---C-T--TA-C--AC-A-T-G-C--A-A-G--T-C--GA-A-CG-----------G-TAA--C-A--G-----------------------------------G-T-C--------------------TTC-G---------------------------G--A--T---------------------------G-C-T----G--AC--G-------AG-T-G-G-C-GA-A--C--G-GG--T--G-A-G-T-A-AT-A-C-A-T-C-GG---A-A-C-GT-G--C-C-CGA--TC-G----T-G-G-G-G-G---AT-AA-C--GA------------------G-G-C-…
>ICSZ4EG01DFN2I
A-A-T--C-A-A-C-G-C--T-G-G-C--G-G--C-G-T-G---C---C-T--TA-C--AC-A-T-G-C--A-A-G--T-C--GA-A-CG-----------G-TA-----A--C---------------------------------G-G-G----------------------TCC-T---------------------------T--C--G-G-------------------------G-A-T----GCCGAC-G-------AG-T-G-G-C-GA-A--C--G-GG--T--G-A-G-T-A-AT-A-T-A-T-C-GG---A-A-C-GT-G--C-C-CAG--TA-G----T-G-G-G-G-G---AT-AA-C--TG------------------C-T-C-…
>ICSZ4EG01DDIYA
A-T-T--G-A-A-C-G-C--T-G-G-C--G-G--C-A-T-G---C---C-T--TA-C--AC-A-T-G-C--A-A-G--T-C--GA-A-CG-----------G-TA-----A--C---------------------------------G-G-G----------------------TCC-T---------------------------T--C--G-G-------------------------G-A-T----GCCGAC-G-------AG-T-G-G-C-GA-A--C--G-GG--T--G-A-G-T-A-AT-A-T-A-T-C-GG---A-A-C-GT-G--C-C-CAG--TA-G----T-G-G-G-G-G----T-AA-C--TG------------------C-T-C-…
>ICSZ4EG01D7V03
A-A-C--G-A-A-C-G-C--T-G-G-C--G-G--C-A-T-G---C---C-T--TA-C--AC-A-T-G-C--A-A-G--T-C--GA-A-CG-----------G-TAA--C-A--G-----------------------------------G-T-C--------------------TTC-G---------------------------G--A--T---------------------------G-C-T----G--AC--G-------AG-T-G-G-C-GA-A--C--G-GG--T--G-A-G-T-A-AT-A-C-A-T-C-GG---A-A-C-GT-G--C-C-CGA--TC-G----T-G-G-G-G-G---AT-AA-C--GA------------------G-G-C-…
>ICSZ4EG01D7NCW
A-T-T--G-A-A-C-G-C--T-G-G-C--G-G--C-A-T-G---C---C-T--AA-C--AC-A-T-G-C--A-A-G--T-C--GA-A-CG-A---------G-A-----------------------------------------------C-C--------------------TTC-G---------------------------G--G------------------------------------------TC--T-------AG-T-G-G-C-GC-A--C--G-GG--T--G-C-G-T-A-AC-G-C-G-T-G-GG---A-A-T-CT-G--C-C-CTT--GG-G----T-T-C-G-G-A---AT-AA-C--TC------------------G-C-C-…
>ICSZ4EG01D7ISF
T---T--G-A-A-C-G-C--T-G-G-C--G-G--C-A-T-G---C---C-T--TA-C--AC-A-T-G-C--A-A-G--T-C--GA-A-CG-----------G-TAA--C-A--G-----------------------------------G-T-C--------------------TTC-G---------------------------G--A--T---------------------------G-C-T----G--AC--G-------AG-T-G---C-GA-A--C--G-GG--T--G-A-G-T-A-AT-A-C-A-T-C-GG---A-A-C-GT-G--C-C-CGA--TC-G----T-G-G-G-G-G---AT-AA-C--GA------------------G-G-C-…
>ICSZ4EG01D45I8
G-A-T--G-A-A-C-G-C--T-A-G-C--G-G--G-A-G-G---C---C-T--AA-C--AC-A-T-G-C--A-A-G--C-C--GA-G-CG-G---------T-A----T-T--G---------------------------------T-T-T-C--------------------TTC-G---------------------------G--A--A-A---------------------------T-G----A--GA--G-------TG-C-G-G-C-GT-A--C--G-GG--T--G-C-G-G-A-AC-A-C-G-T-G-TG---CAA-C-CT-G--C-C-TTT--AT-C----T-G-G-A-G-G---AT-AG-C--CT------------------T-T-C-…
>ICSZ4EG01D3D3W
A-T-T--G-A-A-C-G-C--T-G-G-C--G-G--C-A-T-G---C---C-T--TA-C--AC-A-T-G-C--A-A-G--T-C--GA-A-CG-----------G-TAA--C-A--G-----------------------------------G-T-C--------------------TTC-G---------------------------G--A--T---------------------------G-C-T----G--AC--G-------AG-T-G-G-C-GA-A--C--G-GG--T--G-A-G-T-A-AT-A-C-A-T-C-GG---A-A-C-GT-G--C-CCAGA---C-G----T-G-G-G-G-G---AT-AA-C--GA------------------A-G-C-…
>ICSZ4EG01D0XRI
A-T-T--G-A-A-C-G-C--T-G-A-C--G-G--C-A-T-G---C---C-T--TA-C--AC-A-T-G-C--A-A-G--T-C--GA-A-CG-----------G-TAA--C-A--G-----------------------------------G-T-C--------------------TTC-G---------------------------G--A--T---------------------------G-C-T----G--AC--G-------AG-T-G-G-C-GA-A--C--G-GG--T--G-A-G-T-A-AT-A-C-A-T-C-GG---A-A-C-GT-G--C-C-CGA--TC-G----T-G-G-G-G-G---AT-AA-C--GA------------------A-G-C-…
>ICSZ4EG01CXWBE
A-T-T--G-A-A-C-G-C--T-G-G-C--G-G--C-A-T-G---C---C-T--TA-C--AC-A-T-G-C--A-A-G--T-C--GA-A-CG-----------G-TAA--C-A--G-----------------------------------G-T-C--------------------TTC-G---------------------------G--A--T---------------------------G-C-C----G--AC--G-------AG-T-G-G-C-GA-A--C--G-GG--T--G-A-G-T-A-AT-A-T-A-T-C-GG---A-A-C-GT-G--C-C-CGA--TC-G----T-G-G-G-G-G---AT-AA-C--GA------------------A-G-C-…
>ICSZ4EG01CVS3E
G-A-C--G-A-A-C-G-C--T-G-G-C--G-G--C-A-T-G---C---C-T--AA-C--AC-A-T-G-C--A-A-G--T-C--GA-A-CG-A---------G-A-----------------------------------------------C-C--------------------TTC-G---------------------------G--G------------------------------------------TC--T-------AG-T-G-G-C-GC-A--C--G-GG--T--G-C-G-T-A-AC-G-C-G-T-G-AG---A-A-T-CT-G--C-C-CTT--GG-G----T-T-C-G-G-A---AT-AA-C--TC------------------G-C-C-…
>ICSZ4EG01CTRX2
G-A-T--G-A-A-C-G-C--T-A-G-C--G-G--G-A-G-G---C---C-T--AA-C--AC-A-T-G-C--A-A-G--C-C--GA-G-CG-G---------T-A----C-T--G---------------------------------T-T-T-C--------------------TTC-G---------------------------G--A--A-A---------------------------T-G----A--GA--G-------AG-C-G-G-C-GT-A--C--G-GG--C--G-C-G-T-A-AC-A-C-G-T-G-TG---CAA-C-CT-G--C-C-TTT--AT-C----T-G-G-G-G-G---AT-AG-C--CT------------------T-T-C-…
>ICSZ4EG01CRGGN
A-T-T--G-A-A-C-G-C--T-G-G-C--G-G--C-A-T-G---C---C-T--TA-C--AC-A-T-G-C--A-A-G--T-C--GA-A-CG-----------G-TAA--C-AG-G-----------------------------------G-T-C--------------------TTC-G---------------------------G--A--T---------------------------G-C-T----G--AC--G-------AG-T-G-G-C-GA-A--C--G-GG--T--G-A-G-T-A-AT-A-C-A-T-C-GG---A-A-C-GT-G--C-C-CGA--TCGG----T-G-G-G-G-G---AT-AA-C--GA------------------A-G-C-…
>ICSZ4EG01CNTUL
A-T-T--G-A-A-C-G-C--T-G-G-C--G-G--C-A-T-G---C---C-T--TA-C--AC-A-T-G-C--A-A-G--T-C--GA-A-CG-----------G-TAA--C-A--G-----------------------------------G-T-C--------------------TTC-G---------------------------G--A--T---------------------------G-C-T----G--AC--G-------AG-T-G-G-C-GA-A--T--G-GG--T--G-A-G-T-A-AT-A-C-A-T-C-GG---A-A-C-GT-G--C-C-TGA--TC-G----T-G-G-G-G-G---AT-AA-C--GA------------------G-G-C-…
>ICSZ4EG01CMXQ5
A-T-T--G-A-A-C-G-C--T-G-G-C--G-G--C-A-T-G---C---C-C--TA-C--AC-A-T-G-C--A-A-G--T-C--GA-A-CG-----------G-TAA--C-A--G-----------------------------------G-T-C--------------------TTC-G---------------------------G--A--T---------------------------G-C-T----G--AC--G-------AG-T-G-G-C-GA-A--C--G-GG--T--G-A-G-T-A-AT-A-C-A-T-C-GG---A-A-C-GT-G--C-C-CGA--TC-G----T-G-G-G-G-G---AT-AA-C--GA------------------A-G-C-…
>ICSZ4EG01CKYBE
A-T-T--G-A-A-C-G-C--T-G-G-C--G-G--C-A-T-G---C---C-T--TA-C--AC-A-T-G-C--A-A-G--T-C--GA-G-CG-----------G-TAA--C-A--G-----------------------------------G-T-C--------------------TTC-G---------------------------G--A--T---------------------------G-C-T----G--AC--G-------AG-T-G-G-C-GA-A--C--G-GG--T--G-A-G-T-A-AT-A-C-A-T-C-GG---A-A-C-GT-G--C-C-CGA--TC-G----T-A-G-G-G-G---AT-AA-C--GA------------------A-G-C-…
>ICSZ4EG01CJTRQ
A-T-T--G-A-A-C-G-C--T-G-G-C--G-G--C-A-T-G---C---C-T--TA-C--AC-A-T-G-C--A-A-G--T-C--GA-A-CG-----------G-TAA--C-G--G-------------------------------------GTCC-------------------TTCGGGA----------------------------T------------------------------G-C-C----G--AC--G-------AG-T-G-G-C-GA-A--C--G-GG--T--G-A-G-T-A-AT-A-T-A-T-C-GG---A-A-C-GT-G--C-C-CAG--TA-G----T-G-G-G-G-G---AT-AA-C--TG------------------C-T-C-…
>ICSZ4EG01CI701
A-A-C--G-A-A-C-G-C--T-G-G-C--G-G--C-A-T-G---C---C-T--AA-C--AC-A-T-G-C--A-A-G--T-C--GA-A-CG-A---------G-A-----------------------------------------------C-C--------------------TTC-G---------------------------G--G------------------------------------------TC--T-------AG-C-G-G-C-GC-A--C--G-GG--T--G-C-G-T-A-AC-G-C-G-T-G-GG---A-A-T-TT-G--C-C-CTT--GG-G----T-T-C-G-G-A---AT-AA-C--TC------------------G-C-C-…
>ICSZ4EG01CFPV2
A-T-T--G-A-A-C-G-C--T-G-G-C--G-G--C-A-T-G---C---C-T--TA-C--AC-A-T-G-C--A-A-G--T-CG-GA-A-CG-----------G-TAA--C-AG-G-----------------------------------G-T-C--------------------TTC-G---------------------------G--A--T---------------------------G-C-T----G--AC--G-------AG-T-G-G-C-GA-A--C--G-GG--T--G-A-G-T-A-AT-A-C-A-T-C-GG---A-A-C-GT-G--C-C-CGA--TC-G----T-G-G-G-G-G---AT-AA-CG-GA------------------A-G-C-…
>ICSZ4EG01CDLFT
G-A-T--G-A-A-C-G-C--T-A-G-C--T-A--C-A-G-G---C---T-T--AA-C--AC-A-T-G-C--A-A-G--T-C--GA-G-GG-----------G-CAG--C-A--T----------------G-----------TC-G-G-T-T-G--------------------CTT-G---------------------------C--A--A-C-C-G--AT-----------------G-A-T----G--GC--G-------AC-C-G-G-C-GC-A--C--G-GG--T--G-A-G-T-A-AC-G-C-G-T-A-TC---CAA-C-CT-G--C-CTCTT---A-C----C-A-G-G-G-A---AT-AA-C--CC------------------G-T-C-…
>ICSZ4EG01C9T7M
A-T-T--G-A-A-C-G-C--T-G-G-C--G-G--C-A-T-G---C---C-T--TA-C--AC-A-T-G-CA-A-A-G--T-C--GA-A-CG-----------G-TA-----A--C---------------------------------G-G-G-G--------------------TCC-T---------------------------T--C--G-G-------------------------G-A-T----GCCGAC-G-------AG-T-G-G-C-GA-A--C--G-GG--T--G-A-G-T-A-AT-A-T-A-T-C-GG---A-A-C-GT-G--C-C-CAG--TA-G----T-G-G-G-G-G---AT-AA-C--TG------------------C-T-C-…
>ICSZ4EG01C99SI
A-T-T--G-A-A-C-G-C--T-G-G-C--G-G--C-A-T-G---C---C-T--TA-C--GC-A-T-G-C--A-A-G--T-C--GA-A-CG-----------G-TAA--C-A--G-----------------------------------G-T-C--------------------TTC-G---------------------------G--A--T---------------------------G-C-T----G--AC--G-------AG-T-G-G-C-GA-A--C--G-GG--T--G-A-G-T-A-AT-A-C-A-T-C-GG---A-A-C-GT-A--C-C-CGA--TC-G----T-G-G-G-G-G---AT-AA-C--GA------------------A-G-C-…
>ICSZ4EG01C8TV3
G-A-T--G-A-A-C-G-C--T-A-G-C--G-G--G-A-G-G---C---C-T--AA-C--AC-A-T-G-C--A-A-G--C-C--GA-G-CG-G---------T-A----T-C--G---------------------------------T-T-T-C--------------------TTC-G---------------------------G--A--A-A---------------------------T-G----A--GA--G-------AG-C-G-G-C-GT-A--C--G-GG--T--G-C-G-G-A-AC-A-C-G-T-G-TG---CAA-T-CT-G--C-C-TTT--AT-C----T-G-G-G-G-G---AT-AG-C--CT------------------T-T-C-…
>ICSZ4EG01C62ZJ
G-T-T--G-A-A-C-G-C--T-G-G-C--G-G--C-A-T-G---C---C-T--TA-C--AC-A-T-G-C--A-A-G--T-T--GA-A-CG-----------G-TAA--C-A--G-----------------------------------G-T-C--------------------TTC-G---------------------------G--A--T---------------------------G-C-T----G--AC--G-------AG-T-G-G-C-GA-A--C--G-GG--T--G-A-G-T-A-AT-A-C-A-T-C-GG---A-A-C-GT-G--C-C-CGA--TC-G----T-G-G-G-G-G---AT-AA-C--GA------------------A-G-C-…
>ICSZ4EG01C5M9W
A---T--G-A-A-C-G-C--T-G-G-C--G-G--C-A-T-G---C---T-T--AA-C--AC-A-T-G-C--A-A-G--T-C--GA-A-CG-----------G-TAA--C-A--G-------------------------------------G----------------------TT--A------------------------------A------------------------------G-C-T----G--AC--G-------AG-T-G-G-C-GA-A--C--G-GG--T--G-A-G-T-A-AT-G-T-A-T-C-GG---A-A-C-GT-G--C-C-CAG--TC-G----T-G-G-G-G-G---AT-AA-C--TG------------------C-T-C-…
>ICSZ4EG01C5HSG
G-A-T--G-A-A-C-G-C--C-A-G-C--T-A--C-A-G-G---C---T-T--AA-C--AC-A-T-G-C--A-A-G--T-C--GA-G-GG-----------G-CAG--C-A--T----------------G-----------TC-G-G-T-T-G--------------------CTT-G---------------------------C--A--A-C-C-G--AT-----------------G-A-T----G--GC--G-------AC-C-G-G-C-GC-A--C--G-GG--T--G-A-G-T-A-AC-G-C-G-T-A-TC---CAA-C-CT-G--C-C-TTT--TA-C----C-A-G-G-G-A---AT-AA-C--CC------------------G-T-C-…
>ICSZ4EG01C4OAJ
A-T-T--G-A-A-C-G-C--T-G-G-C--G-G--C-A-T-G---C---C-T--TA-C--AC-A-T-G-C--A-A-G--T-C--GA-A-CG-----------G-TA-----A--C---------------------------------A-G-G----------------------TTA-A-------------------------------------------------------------G-C-T----G--AC--G-------AG-T-G-G-C-GA-A--C--G-GG--T--G-A-G-T-A-AT-A-T-G-T-C-GG---A-A-C-GT-G--C-C-CAG--TA-G----T-G-G-G-G-G---AT-AA-C--TG------------------C-T-C-…
>ICSZ4EG01ET3GW
A-T-T--G-A-A-C-G-C--T-G-G-C--G-G--C-A-T-G---C---C-T--TA-C--AC-A-T-G-C--A-A-G--T-C--GA-A-CG-----------G-TA-----A--C---------------------------------A-G-G-T--------------------CTT-C---------------------------G--G--A-T-------------------------G-C-T----G--AC--G-------AG-T-G-G-C-GA-A--C--G-GG--T--G-A-G-T-A-AT-A-T-A-T-C-GG---A-A-C-GT-G--C-C-CAG--TA-G----T-G-G-G-G-G---AT-AA-C--TG------------------C-T-C-…
>ICSZ4EG01C4IDC
G-A-C--G-A-A-C-G-C--T-G-G-C--G-G--C-G-T-G---C---T-T--AA-C--AC-A-T-G-C--A-A-G--T-C--GA-A-CG-----------G-AA---A-G--G-----------------------------C-C---C-A-G--------------------CTT-G---------------------------C--T----G-G-G-----------------------T-G----C--TC--G-------AG-T-G-G-C-GA-A--C--G-GG--T--G-A-G-T-A-AC-A-C-G-T-G-GG---TGA-T-CT-G--C-C-CCT--AA-C----T-T-C-G-G-G---AT-AA-G--CT------------------T-G-G-…
>ICSZ4EG01C2SV0
A-T-T--G-A-A-C-G-C--T-G-G-C--G-G--C-A-T-G---C---C-T--TA-C--AC-A-T-G-C--A-A-G--T-C--GA-A-CG-----------G-TAA--C-A--G-------------------------------------G----------------------TT--A------------------------------A------------------------------G-C-T----G--AC--G-------AG-T-G-G-C-GA-A--C--G-GG--T--G-A-G-T-A-AT-G-T-A-T-C-GG---A-A-C-GT-G--C-C-CAG--TC-G----T-G-G-G-G-G---AT-AA-C--TG------------------C-T-C-…
>ICSZ4EG01C2QNE
A-T-T--G-A-A-C-G-C--T-G-G-C--A-G--C-A-T-G---C---C-T--TA-C--AC-A-T-G-C--A-A-G--T-C--GA-A-CG-----------G-TAA--C-A--G-----------------------------------G-T-C--------------------TTC-G---------------------------G--A--T---------------------------G-C-T----G--AC--G-------AG-T-G-G-C-GA-A--C--G-GG--T--G-A-G-T-A-AT-A-C-A-T-C-GG---A-A-C-GT-G--C-C-CGA--TC-G----T-G-G-G-G-G---AT-AA-C--GA------------------G-G-C-…
>ICSZ4EG01BW7SW
A-T-T--G-A-A-C-G-C--T-G-G-C--G-G--C-A-T-G---C---C-T--TA-C--AC-A-T-G-C--A-A-G--T-C--GA-A-CG-----------G-TA-----A--C---------------------------------A-G-G-T--------------------CTT-C---------------------------G--G--A-T-------------------------G-C-T----G--AC--G-------AG-T-G-G-C-GA-A--C--G-GG--T--G-A-G-T-A-AT-A-C-A-T-C-GG---A-A-C-GT-G--C-C-CGA--TC-G----T-G-G-G-G-G---AT-AA-C--TG------------------C-T-C-…
>ICSZ4EG01BUDK6
A-A-C--G-A-A-C-G-C--T-G-G-C--G-G--C-A-T-G---C---C-T--AA-C--AC-A-T-G-C--A-A-G--T-C--GA-A-CG-----------G-TAA--C-A--G-----------------------------------G-T-C--------------------TTC-G---------------------------G--A--T---------------------------G-C-T----G--AC--G-------AG-T-G-G-C-GA-A--C--G-GG--T--G-A-G-T-A-AT-A-C-A-T-C-GG---A-A-C-GT-G--C-C-CGA--CC-G----T-G-G-G-G-G---AT-AA-C--GA------------------A-G-C-…
>ICSZ4EG01BSOX8
G-ATT--G-A-A-C-G-C--T-G-G-C--G-G--C-A-T-G---C---C-T--TA-C--AC-A-T-G-C--A-A-G--T-C--GA-G-GG-----------G-CAG--C-A--T----------------G-----------TC-G-G-T-T-G--------------------CTT-G---------------------------C--A--A-C-C-G--AT-----------------G-A-T----G--GC--G-------AC-C-G-G-C-GC-A--C--G-GG--T--G-A-G-T-A-AC-G-C-G-T-A-TC---CAA-C-CT-G--C-CTCTT---A-C----C-A-G-G-G-A---AT-AA-C--CC------------------G-T-C-…
>ICSZ4EG01BRV5Y
A-T-T--G-A-A-C-G-T--T-G-G-C--G-G--C-A-T-G---C---C-T--TA-C--AC-A-T-G-C--A-A-G--T-C--GA-A-CG-----------G-TAA--C-A--G-----------------------------------G-T-C--------------------TTCGG---------------------------G--A--T---------------------------G-C-T----G--AC--G-------AG-T-G-G-C-GA-A--C--G-GG--T--G-A-G-T-A-AT-A-C-A-T-C-GG---A-A-C-GT-G--C-C-CGA--TC-G----T-G-G-G-G-G---AT-AA-C--GA------------------A-G-C-…
>ICSZ4EG01BRFO3
A-T-T--G-A-A-C-G-C--T-G-G-C--G-G--C-A-T-G---C---C-T--TA-C--AC-A-T-G-C--A-A-G--T-C--GG-A-CG-----------G-TAA--C-A--G-----------------------------------G-T-C--------------------TTC-G---------------------------G--A--T---------------------------G-C-C----G--AC--G-------AG-T-G-G-C-GA-A--C--G-GG--T--G-G-G-T-A-AT-A-C-A-T-C-GG---A-A-C-GT-G--C-C-CGA--TC-G----T-G-G-G-G-G---AT-AA-C--GA------------------A-G-C-…
>ICSZ4EG01BQXA2
A-G-C--G-A-A-C-G-C--T-G-G-C--G-G--C-A-G-G---C---T-T--AA-C--AC-A-T-G-C--A-A-G--T-C--GA-A-CG-G---------G-C-----------------------------------------------A-C--------------------TTC-G---------------------------G--T------------------------------------------GC--T-------AG-T-G-G-C-GC-A--C--G-GG--T--G-C-G-T-A-AC-G-C-G-T-G-GG---A-A-T-CT-G--C-C-CTT--GG-G----T-T-C-G-G-A---AT-AA-C--TC------------------G-C-C-…
>ICSZ4EG01BPS8Q
G-A-T--G-A-A-C-G-C--T-A-G-T--G-G--G-A-G-G---C---C-T--AA-C--AC-A-T-G-C--A-A-G--C-C--GA-G-CG-G---------T-A----T-T--G---------------------------------T-T-T-C--------------------TTC-G---------------------------G--A--A-A---------------------------T-G----A--GA--G-------AG-C-G-G-C-GT-A--C--G-GG--T--G-C-G-T-A-AC-A-C-G-T-G-TG---CAA-C-CT-G--C-C-TTT--AT-C----T-G-G-G-G-G---AT-AG-C--CT------------------T-T-C-…
>ICSZ4EG01BNZF8
A-T-T--G-A-A-C-G-C--T-G-G-C--G-G--C-A-T-G---C---C-T--TA-C--AC-A-T-G-C--A-A-G--T-C--GA-A-CG-----------G-TAA--C-A--G-----------------------------------G-T-C--------------------TTC-G---------------------------G--A--T---------------------------G-CTT----G--AC--G-------AG-T-G-G-C-GA-A--C--A-GG--T--G-A-G-T-A-AT-A-C-A-T-C-GG---A-A-C-GT-G--C-C-CGA--TC-G----T-G-G-G-G-G---AT-AA-C--GA------------------A-G-C-…
>ICSZ4EG01BNT3M
G-A-C--G-A-A-C-G-C--T-A-G-C--G-G--G-A-G-G---C---T-T--AA-C--AC-A-T-G-C--A-A-G--C-C--GA-G-CG-G---------T-A----T-T--G---------------------------------T-T-T-C--------------------TTC-G---------------------------G--A--A-A---------------------------T-G----A--GA--G-------AG-C-G-G-C-GT-A--C--G-GG--T--G-C-G-G-A-AC-A-C-G-T-G-TG---CAA-C-CT-G--C-C-TTT--AT-C----T-G-G-G-G-G---AT-GG-C--CT------------------T-T-C-…
>ICSZ4EG01BNJPG
A-T-T--G-A-A-C-G-C--T-G-G-C--G-G--C-A-T-G---C---C-T--TA-C--AC-A-T-G-C--A-A-G--T-C--GA-A-CG-----------G-TA-----A--C---------------------------------G-G-G----------------------TCC-T---------------------------T--C--G-G------------------------GACGCC----G--AC--G-------AG-T-G-A-C-GA-A--C--G-GG--T--G-A-G-T-A-AT-A-T-A-T-C-GG---A-A-C-GT-G--C-C-CAG--TA-G----T-G-G-G-G-G---AT-AA-C--TG------------------C-T-C-…
>ICSZ4EG01BMRID
G-A-T--G-A-A-C-G-C--T-A-G-C--G-G--G-A-G-G---C---C-T--AA-C--GC-A-T-G-C--A-A-G--C-C--GA-G-CG-G---------T-A----T-T--G---------------------------------T-T-T-C--------------------TTC-G---------------------------G--A--A-A---------------------------T-G----A--GA--G-------AG-C-G-G-C-GT-G--C--G-GG--T--G-C-G-T-A-AC-A-C-G-T-G-TG---CAA-C-CT-G--C-C-TTT--AT-C----T-G-G-G-G-G---AT-AG-C--CT------------------T-T-C-…
>ICSZ4EG01BMQIR
A-T-T--G-A-A-C-G-C--T-G-G-C--G-G--C-A-T-G---C---C-T--TA-C--AC-A-T-G-C--A-A-G--T-C--GA-A-CG-----------G-TAA--C-A--GA------------------------------------T-C--------------------TTC-G---------------------------G--A--T---------------------------G-C-T----G--AC--G-------AG-T-G-G-C-GA-A--C--G-GG--T--G-A-G-T-A-AT-A-C-A-T-C-GG---A-A-C-GT-G--C-C-CGA--TC-G----T-G-T-G-G-G---AT-AA-C--GA------------------G-G-C-…
>ICSZ4EG01ARM8Y
A-T-T--G-A-A-C-G-C--T-G-G-C--G-G--C-A-T-G---C---C-T--TA-C--AC-A-T-G-C--A-A-G--T-C--GA-A-CG-----------G-TAA--C-G--G-----------------------------------G-TCC--------------------TTCGG---------------------------G--A--T---------------------------G-C-C----G--AC--G-------AG-T-G-G-C-GA-A--C--G-GG--T--G-A-G-T-A-AT-A-T-A-T-C-GG---A-A-C-GT-G--C-C-CGA--TC-G----T-G-G-G-G-G---AT-AA-C--GA------------------A-G-C-…
>ICSZ4EG01BIVXX
A-T-T--G-A-A-C-G-C--T-G-G-C--G-G--C-A-T-G---C---C-T--TA-C--AC-A-T-G-C--A-A-G--T-C--GA-A-CG-----------G-TAA--C-G--G-----------------------------------G-T-C--------------------TTC-G---------------------------G--A--T---------------------------G-C-T----G--AC--G-------AG-T-G-G-T-GA-A--C--G-GG--T--G-A-G-T-A-AT-A-C-A-T-C-GG---A-A-C-GT-G--C-C-CAG--AC-G----T-G-G-G-G-G---AT-AA-C--GA------------------G-G-C-…
>ICSZ4EG01BHLCV
A-A-C--G-A-A-C-G-C--T-G-G-C--G-G--C-A-T-G---C---C-T--TA-C--AC-A-T-G-C--A-A-G--T-C--GA-A-CG-----------G-TAA--C-G--G-------------------------------------GTCC-------------------TTCGGGA----------------------------T------------------------------G-C-C----G--AC--G-------AG-T-G-G-C-GA-A--C--G-GG--T--G-A-G-C-A-AT-A-T-A-T-C-GG---A-A-C-GT-G--C-C-CAG--T--A----T-G-G-G-G-G---AT-AA-C--TG------------------C-T-C-…
>ICSZ4EG01BF0MY
G-A-T--G-A-A-C-G-C--T-A-G-C--T-A--C-A-G-G---C---T-T--AA-C--AC-A-T-G-C--A-A-G--T-C--GA-G-GG-----------G-CAG--C-A--T----------------A-----------TC-G-G-T-T-G--------------------CTT-G---------------------------C--A--A-C-C-G--AT-----------------G-A-T----G--GC--G-------AC-C-G-G-C-GC-A--C--G-GG--T--G-A-G-T-A-AC-G-C-G-T-A-TC---CAA-C-CT-G--C-CTCTT---A-C----C-A-G-G-G-A---AT-AA-C--TC------------------G-T-C-…
>ICSZ4EG01BATEY
G-A-T--G-A-A-C-G-C--T-A-G-C--G-G--G-A-G-G---C---C-T--AA-C--AC-A-T-G-C--A-A-G--C-C--GA-G-CG-G---------T-A----T-T--G---------------------------------T-T-T-C--------------------CTC-G---------------------------G--A--A-A---------------------------T-G----A--GA--G-------AG-C-G-G-C-GT-A--C--G-GG--T--G-C-G-G-A-AC-A-C-G-T-G-TG---CAA-C-CT-G--C-C-TTT--AT-C----T-G-G-G-G-G---AT-AG-C--CT------------------T-T-C-…
>ICSZ4EG01B8PXC
A---C--G-A-A-C-G-C--T-G-G-C--G-G--C-A-T-G---C---C-T--TA-C--AC-A-T-G-C--A-A-G--T-C--GA-A-CG-----------G-TA-----A--C---------------------------------G-G-G----------------------TC--C---------------------------T--T--C-G-------------------------G-G-T----GCCGAC-G-------AG-T-G-G-C-GA-A--C--G-GG--T--G-A-G-T-A-AT-A-T-A-T-C-GG---A-A-C-GT-G--C-C-CAG--TA-G----T-G-G-G-G-G---AT-AA-C--TG------------------C-T-C-…
>ICSZ4EG01B5D6V
A-T-T--G-A-A-C-G-C--T-G-G-C--G-G--C-A-T-G---C---C-T--TA-C--AC-A-T-G-C--A-A-G--T-C--GA-A-CG-----------G-TAA--C-A--G-------------------------------------G----------------------TT--A------------------------------A------------------------------G-C-T----G--AC--G-------AG-T-G-G-C-GA-A--C--G-GA--T--G-A-G-T-A-AT-G-T-A-T-C-GG---A-A-C-GT-G--C-C-CAG--TC-G----T-G-G-G-G-G---AT-AA-C--TG------------------C-T-C-…
>ICSZ4EG01B55T7
A-T-T--G-A-A-C-G-C--T-G-G-C--G-G--C-A-T-G---C---C-T--TA-C--AC-A-T-G-C--A-A-G--T-C--GA-A-CG-----------G-TAA--C-A--G-----------------------------------G-T-C--------------------TTC-G---------------------------G--A--T---------------------------G-C-T----G--AC--G-------AG-T-G-G-C-GA-A--C--G-GG--T--G-A-G-T-A-AT-A-C-A-T-C-GG---A-A-C-GT-G--C-C-CGA--TC-G----T-G-G-G-G-G---AT-AA-C--GA------------------G-G-C-…
>ICSZ4EG01B4X5W
A-T-T--G-A-A-C-G-C--T-G-G-C--G-G--C-A-T-G---C---C-T--TA-C--AC-A-T-G-C--A-A-G--T-C--GA-A-CG-----------G-TAA--C-G--------------------------------------G-G-T--------------------CCT-T---------------------------CGGGA-T---------------------------G-C-C----G--AC--G-------AG-T-G-G-C-GA-A--C--G-GG--T--G-A-G-T-AATT-A-T-A-T-C-GG---A-A-C-GT-G--C-C-CAG--TA-G----T-G-G-G-G-G---AT-AA-C--TG------------------C-T-C-…
>ICSZ4EG01B4E4I
A-T-T--G-A-A-C-G-C--T-G-G-C--G-G--C-A-T-G---C---C-T--TA-C--AC-A-T-G-C--A-A-G--T-C--GA-A-CG-----------G-CAGG-C-A--CG--------------------------------G-G-G-A--------------------GCA-A---------------------------T--C--C-T-------------------------G-G-T----G--GC--G------AGG-T-G-G-C-GA-A--C--G-GG--T--G-A-G-T-A-AT-A-C-A-TCC-GG---A-A-C-GT-G--C-CCGAG--TA-G----T-G-G-G-G-G---AT-AA-C--CC------------------G-G-C-…
>ICSZ4EG01B3V9L
A-T-T--G-A-A-C-G-C--T-G-G-C--G-G--C-A-T-G---C---C-T--TA-C--AC-A-T-G-C--A-A-G--T-C--GA-A-CG-----------G-TA-----A--C---------------------------------G-G-G----------------------TCC-T---------------------------T--C--G-G-------------------------G-A-T----GCCGAC-G-------AG-T-G-G-C-GA-A--C--G-GG--T--G-A-G-T-A-AT-A-T-A-T-C-GG---A-A-C-GT-G--C-C-CAG--TA-G----T-G-G-G-G-G---AT-AG-C--TG------------------C-T-C-…
>ICSZ4EG01B2V6J
A-T-T--G-A-A-C-G-C--T-G-G-C--G-G--C-A-T-G---C---C-T--TA-C--AC-A-C-G-C--A-A-G--T-C--GA-A-CG-----------G-TAA--C-A--G-----------------------------------G-T-C--------------------TTC-G---------------------------G--A--T---------------------------G-C-T----G--AC--G-------AG-T-G-G-C-GA-A--C--G-GG--T--G-A-G-T-A-AT-A-C-A-T-C-GG---A-A-C-GT-G--C-C-CGA--TC-G----T-G-G-G-G-G---AT-AA-C--GA------------------A-G-C-…
>ICSZ4EG01B2D35
A-C-T--G-A-A-C-G-C--T-G-G-C--G-G--C-A-T-G---C---C-T--TA-C--AC-A-T-G-C--A-A-G--T-C--GA-A-CG-----------G-TAA--C-A--G-----------------------------------G-T-C--------------------TTC-G---------------------------G--G--T---------------------------G-C-T----G--AC--G-------AG-T-G-G-C-GA-A--C--G-GG--T--G-A-G-T-A-AT-A-C-A-T-C-GG---A-A-C-GT-G--C-C-CGA--TC-G----T-G-G-G-G-G---AT-AA-C--GA------------------A-G-C-…
>ICSZ4EG01B03E3
G-A-T--G-A-A-C-G-C--T-A-G-C--G-G--G-A-G-G---C---C-T--GA-C--AC-A-T-G-C--A-A-G--C-C--GA-G-CG-G---------T-A----T-T--G---------------------------------T-T-T-C--------------------TTC-G---------------------------G--A--A-A---------------------------T-G----A--GA--G-------AG-C-G-G-C-GT-A--C--G-GG--T--G-C-G-G-A-AC-A-C-G-T-G-TG---CAA-C-CT-G--C-C-TTT--AT-C----T-G-G-G-G-G---AT-AG-C--CT------------------T-T-C-…
>ICSZ4EG01AZ69P
A-A-C--G-A-A-C-G-C--T-A-G-C--G-G--G-A-G-G---C---C-T--AA-C--AC-A-T-G-C--A-A-G--C-C--GA-G-CG-G---------T-A----T-T--G---------------------------------T-T-T-C--------------------TTC-G---------------------------G--A--A-A---------------------------T-G----A--GA--G-------AG-C-G-G-C-GT-A--C--G-GG--T--G-C-G-T-A-AC-A-C-G-T-G-TG---CAA-C-CT-G--C-C-TTT--AT-C----T-G-G-G-G-G---AT-AG-C--CT------------------T-T-C-…
>ICSZ4EG01AYXEH
A-T-T--G-A-A-C-G-C--T-G-G-C--G-G--C-A-T-G---C---C-T--TA-C--AC-A-T-G-C--A-A-G--T-C--GA-A-CG-----------G-TAA--C-A--G-----------------------------------G-T-C--------------------TTC-G---------------------------G--A--T---------------------------G-C-T----G--AC--G-------AG-T-G-G-C-GA-A--C--G-GG--T--G-A-G-T-A-AT-A-C-A-T-C-GG---A-A-C-GT-G--C-C-C----AC-G----T-G-G-G-G-G---AT-AA-C--GA--------------------G-C-…
>ICSZ4EG01AVQF6
A-T-T--G-A-A-C-G-C--T-G-G-C--G-G--C-A-T-G---C---C-T--TA-C--AC-A-T-G-C--A-A-G--T-C--GA-A-CG-----------G-TAA--C-A------------------------------------G-G-T-C--------------------TTC-G---------------------------G--G--A-T-------------------------G-C-C----G--AC--G-------AG-T-G-G-C-GA-A--C--G-GG--T--G-A-G-T-A-AT-A-T-A-T-C-GG---A-G-C-GT-G--C-C-CAG--TA-G----T-G-G-G-G-G---AT-AA-C--TG------------------C-T-T-…
>ICSZ4EG01AVOPK
A---T--G-A-A-C-G-C--T-G-G-C--G-G--C-A-T-G---C---C-T--TA-C--AC-A-T-G-C--A-A-G--T-C--GA-A-CG-----------G-TAA--C-G--G-------------------------------------GTCC-------------------TTCGGA-----------------------------T------------------------------G-C-C----G--AC--G-------AG-T-G-G-C-GA-A--C--G-GG--T--G-A-G-T-A-AT-A-T-A-T-C-GG---A-A-C-GT-G--C-C-CAG--TC-G----T-G-G-G-G-G---AT-AA-C--TG------------------C-T-C-…
>ICSZ4EG01AUHHV
A-A-C--G-A-A-C-G-C--T-G-A-C--G-G--C-A-T-G---C---C-T--AA-C--AC-A-T-G-C--A-A-G--T-C--GA-A-CG-A---------G-A-----------------------------------------------C-C--------------------TTC-G---------------------------G--G------------------------------------------CC--T-------AG-T-G-G-C-GC-A--C--G-GG--T--G-C-G-T-A-AC-G-C-G-T-G-AG---A-A-T-CT-G--C-C-CTT--GG-G----T-T-C-G-G-A---AT-AA-C--TC------------------G-C-C-…
>ICSZ4EG01AT13Y
A-T-T--G-A-A-C-G-C--T-G-G-C--G-G--C-A-T-G---C---C-T--TA-C--AC-A-T-G-C--A-A-G--T-C--GA-A-CG-----------G-TAA--C-A--G-----------------------------------G-T-C--------------------TTC-G---------------------------G--A--T---------------------------G-C-T----G--AC--G-------AG-T-G-G-C-GA-A--C--G-GG--T--G-A-G-T-A-AT-A-C-A-T-C-GG---A-A-C-GT-G--C-CCAGA---C-G----T-G-G-G-G-G---AT-AA-C--GA------------------G-G-C-…
>ICSZ4EG01ASGAG
G-A-T--G-A-A-C-G-C--T-A-G-C--G-A--C-A-G-G---C---C-T--AA-C--AC-A-T-G-C--A-A-G--T-C--GA-G-GG-----------G-CATCGGGAC-G-------------------------------A-G-G-A-G-------------------CAAT-C---------------------------CT-T--G-C-C-----------------------G-C-C----G--GC--G-------AC-C-G-G-C-GC-A--C--G-GG--T--G-A-G-T-A-AC-G-C-G-T-A-TG---CGA-C-CT-G--C-C-CGT--TG-C----A-G-G-G-G-G---AT-AA-T--CG------------------G-G-A-…
>ICSZ4EG01AS7PQ
A-T-T--G-A-A-C-G-C--T-G-G-C--G-G--C-A-T-G---C---C-T--TA-C--AC-A-C-G-C--A-A-G--T-C--GA-A-CG-----------G-TAA--C-A--G-----------------------------------G-T-C--------------------TTC-G---------------------------G--A--T---------------------------G-C-T----G--AC--G-------GG-T-G-G-C-GA-A--C--G-GG--T--G-A-G-T-A-AT-A-C-A-T-C-GG---A-A-C-GT-G--C-C-CGA--TC-G----T-G-G-G-G-G---AT-AA-C--GA------------------G-G-C-…
>ICSZ4EG01ARONR
A-C-T--G-A-A-C-G-C--T-G-G-C--G-G--C-A-T-G---C---C-T--TA-C--AC-A-T-G-C--A-A-G--T-C--GA-A-CG-----------G-TA-----A--C---------------------------------G-G-G----------------------TCC-T---------------------------T--C--G-G-------------------------G-A-T----GCCGAC-G-------AG-T-G-G-C-GA-A--C--G-GG--T--G-A-G-T-A-AT-A-T-A-T-C-GG---A-A-C-GT-G--C-C-CAG--TA-G----T-G-G-G-G-G---AT-AA-C--TG------------------C-T-C-…
>ICSZ4EG01APA66
A-T-T--G-A-A-C-G-C--T-G-G-C--G-G--C-A-T-G---C---C-T--TA-C--AC-A-T-G-C--A-A-G--T-C--GA-A-CG-----------G-TAA--C-G--------------------------------------G-G-T--------------------CCT-T---------------------------CGGGA-T---------------------------G-C-C----G--AC--G-------AG-T-G-G-C-GA-A--C--G-GG--T--G-A-G-T-A-AT-A-T-A-T-C-GG---A-A-C-GT-G--C-C-CAG--TA-G----T-G-G-G-G-G---AT-AA-C--TG------------------C-T-C-…
>ICSZ4EG01ANZG1
A-T-T--G-A-A-C-G-C--T-G-G-C--G-G--C-A-T-G---C---C-T--TA-C--AC-A-T-G-C--A-A-G--T-C--GA-A-CG-----------G--TG----A--C---------------------------------G-G-G----------------------TCC-T---------------------------T--C--G-G-------------------------G-A-T----GCCGAC-G-------AA-T-G-G-C-GA-A--C--G-GG--T--G-A-G-T-A-AT-A-T-A-T-C-GG---A-A-C-GT-G--C-C-CAG--TA-G----T-G-G-G-G-G---AT-AA-C--TG------------------C-T-C-…
>ICSZ4EG01AMBCS
G-A-T--G-A-A-C-G-C--C-A-G-C--G-G--G-A-G-G---C---C-T--AG-C--AC-A-T-G-C--A-A-G--C-C--GA-G-CG-G---------T-A----T-T--G---------------------------------T-T-T-C--------------------TTC-G---------------------------G--A--A-A---------------------------T-G----A--GA--G-------AG-C-G-G-C-GT-A--C--G-GG--T--G-C-G-G-A-AC-A-C-G-T-G-TG---CAA-C-CT-G--C-C-TTT--AT-C----T-G-G-G-G-G---AT-AG-C--CT------------------T-T-C-…
>ICSZ4EG01AM1K0
G-A-T--G-A-A-C-G-C--T-A-G-C--G-G--G-A-G-G---C---C-T--AA-C--AC-A-T-G-C--A-A-G--C-C--GA-G-CG-G---------T-A----T-T--G---------------------------------T-T-T-C--------------------TTC-G---------------------------G--A--A-A---------------------------T-G----A--GA--G-------AG-C-G-G-C-GT-A--C--G-AG--T--G-C-G-T-A-AC-A-C-G-T-G-TG---CAA-C-CT-G--C-C-TTT--AT-C----C-G-G-G-G-G---AT-AG-C--CT------------------T-T-C-…
>ICSZ4EG01AFVPN
A-T-T--G-A-A-C-G-C--T-G-G-C--G-G--C-A-T-G---C---C-T--TA-C--AC-A-T-G-C--A-A-G--T-C--GA-A-CG-----------G-TAA--CGA--G-----------------------------------G-T-C--------------------TTC-G---------------------------G--A--T---------------------------G-C-T----G--AC--G-------AG-T-G-G-C-GA-A--C--G-GG--T--G-A-G-T-A-AT-A-C-A-T-C-GG---A-A-C-GT-G--C-C-CGA--TC-G----T-G-G-G-G-G---AT-AA-C--GA------------------A-G-C-…
>ICSZ4EG01A7T52
G-A-C--G-A-A-C-G-C--T-G-G-C--G-G--C-A-T-G---C---C-T--AA-C--AC-A-T-G-C--A-A-G--T-C--GA-A-CG-A---------G-A-----------------------------------------------C-C--------------------TTC-G---------------------------G--G------------------------------------------TC--T-------AG-T-G-G-C-GC-A--T--G-GG--C--G-C-G-T-A-AC-G-C-G-T-G-GG---A-A-T-CT-G--C-C-CTT--GG-G----T-T-C-G-G-A---AT-AA-C--TC------------------G-C-C-…
>ICSZ4EG01A5UD4
A-T-C--G-A-A-C-G-C--T-G-G-C--G-G--C-A-T-G---C---C-T--TA-C--AC-A-T-G-C--A-A-G--T-C--GA-A-CG-----------G-TAA--C-A--G-----------------------------------G-T-C--------------------TTC-G---------------------------G--A--T---------------------------G-C-T----G--AC--G-------AG-T-G-G-C-GA-A--C--G-GG--T--G-A-G-T-A-AT-A-C-A-T-C-GG---A-A-C-GT-G--C-C-CAG--AC-G----T-G-G-G-G-G---AT-AA-C--GA------------------G-G-C-…
>ICSZ4EG01A3SWG
A-A-C--G-A-A-C-G-C--T-G-G-C--G-G--C-A-T-G---C---C-T--TA-C--AC-A-T-G-C--A-A-G--T-C--GA-A-CG-----------G-TAA--C-A--G-----------------------------------G-T-C--------------------TTC-G---------------------------G--A--T---------------------------G-C-T----G--AC--G-------AG-T-G-G-C-GA-A--C--G-GG--T--G-A-G-T-A-AT-A-C-A-T-C-GG---A-A-C-GT-G--C-C-CGA--TC-G----T-G-G-G-G-G---AT-AA-C--GA------------------A-G-C-…
>ICSZ4EG01A16JL
A-T-T--G-A-A-C-G-C--T-G-G-C--G-G--C-A-T-G---C---C-T--TA-C--AC-A-T-G-C--A-A-G--T-C--GA-A-CG-----------G-TAA--C-A--G-----------------------------------G-T-C--------------------CTC-G---------------------------G--A--T---------------------------G-C-T----G--AT--G-------AG-T-G-G-C-GA-A--C--G-GG--T--G-A-G-T-A-AT-A-C-G-T-C-GG---A-A-C-GT-G--C-C-CGA--TC-G----T-G-G-G-G-G---AT-AA-C--GA------------------A-G-C-…
>ICSZ4EG01D00BE
G-A-T--G-A-A-C-G-C--T-A-G-C--T-A--C-A-G-G---C---T-T--AA-C--AC-A-T-G-C--A-A-G--T-C--GC-A-GG-----------G-TAA--C-A--T----------------G-----------AG-G-A-A-A-G--------------------CTT-G---------------------------C--T--T-T-C-C--TT-----------------G-A-T----G--AC--G-------AC-T-G-G-C-GC-A--C--G-GG--T--G-A-G-T-A-AC-G-C-G-T-A-TC---CAA-C-CT-T--C-C-CAT--AA-C----T-A-C-G-G-G---AT-AA-C--CC------------------G-T-T-…
>ICSZ4EG01D4TNJ
G-A-T--G-A-A-C-G-C--T-G-G-C--G-G--C-G-T-G---C---T-T--AA-C--AC-A-T-G-C--A-A-G--T-C--GA-A-CG-G---------A-GTT--ATT--T----------TGTTG-G-----------AA-G-G-GAACAGTTTA---------------CTG-G------------GACCG----------------G-A-A----GAG--GGAA------------T-A----A--CT--T-------AG-T-G-G-C-GG-A--C--G-GG--T--G-A-G-T-A-AC-G-C-G-T-G-GG---TAA-C-CT-G--C-C-GTA--TA-C----A-G-G-G-G-G---AT-AA-C--AC------------------T-T-A-…
>ICSZ4EG01BJ0MW
A-T-T--G-A-A-C-G-C--T-G-G-C--G-G--C-A-T-G---C---T-T--TA-C--AC-A-T-G-C--A-A-G--T-C--GA-A-CG-----------G-TAA--C-A--G-----------------------------------G-T-C--------------------TTC-G---------------------------G--A--T---------------------------G-C-T----G--AC--G-------AG-T-G-G-C-GA-A--C--G-GG--T--G-A-G-T-A-AT-A-C-A-T-C-GG---A-A-C-GT-G--C-C-TAG--TA-G----T-G-G-G-G-G---AT-AA-C--TA------------------C-T-C-…
>ICSZ4EG01EF3U2
G-A-C--G-A-A-C-G-C--T-G-G-C--G-G--C-G-T-G---C---C-T--AA-T--AC-A-T-G-C--A-A-G--T-C--GA-G-CG-A---------G-T----C-T--G---CCTT--GAAGA--T-----------CG-G-A-G-T-G--------------------CTT-G---------------------------C--A--C-T-C-T--GT---GAAACAAG-A----TAC-A----G--GC--T-------AG-C-G-G-C-GG-A--C--G-GG--T--G-A-G-T-A-AC-A-C-G-T-G-GG---TAA-C-CT-G--C-C-CAA--GA-G----A-T-C-G-G-G---AT-AA-C--AC------------------C-T-G-…
>ICSZ4EG01CZHTA
G-A-T--G-A-A-C-G-C--T-A-G-C--G-G--C-A-G-G---C---T-T--AA-T--AC-A-T-G-C--A-A-G--T-C--GA-G-GG-----------G-CAG--C-G--G----------------------------GG-----G-T-A--------------------GCA-A---------------------------T--A--C-----C--T------------------G-C-C----G--GC--G-------AC-C-G-G-C-AA-A--C--G-GG--T--G-A-G-G-A-AC-A-T-G-T-A-CG---CAA-C-CT-T--C-C-TTT--AA-C----T-G-G-A-G-G---AT-AG-C--CC------------------C-T-C-…
>ICSZ4EG01EFS00
G-A-C--G-A-A-C-G-C--T-G-G-C--G-G--C-G-T-G---C---T-T--AA-C--AC-A-T-G-C--A-A-G--T-C--GA-G-CG-----------G-TA---A-G--G-------------------------------C-----C-C--------------------TTC-----------------------------G--G------G-G-----------------------T-A----C--AC--G-------AG-C-G-G-C-GA-A--C--G-GG--T--G-A-G-T-A-AC-A-C-G-T-G-AG---CAA-T-CT-G--C-C-CTT--CA-C----T-T-T-G-G-G---AT-AA-C--GC------------------T-G-G-…
>ICSZ4EG01C8UIG
A-T-T--G-A-A-C-G-C--T-G-G-C--G-G--C-A-T-G---C---T-T--TA-C--AC-A-T-G-C--A-A-G--T-C--GA-A-CG-----------G-CAG--C-A--C---------------------------------G---G-GCT------------------TCG-G---------------------------C--C----T-------------------------G-G-T----G--GC--G-------AG-T-G-G-C-GA-A--C--G-GG--T--G-A-G-T-A-AT-A-C-A-T-C-GG---A-A-C-GT-A--C-C-CAG--AA-G----T-G-G-G-G-G---AT-AA-C--GT------------------A-G-C-…
>ICSZ4EG01APWZ7
G-A-C--G-A-A-C-G-C--T-G-G-C--G-G--T-G-T-G---C---T-T--CA-C--AC-A-T-G-C--A-A-G--T-C--GA-A-CG-A---------G-G-----------------------------------------------T-A--------------------GCA-A---------------------------T--A------------------------------------------CC--T-------AG-T-G-G-C-GG-A--C--G-GG--T--G-A-G-T-A-AC-G-C-G-T-G-GG---A-A-T-CT-G--C-C-TTT--AG-A----T-G-G-G-G-G---AT-AA-C--GG------------------G-T-C-…
>ICSZ4EG01AL1VW
G-A-T--G-A-A-C-G-C--T-A-G-C--G-A--C-A-G-G---C---T-T--AA-C--AC-A-T-G-C--A-A-G--T-C--GA-G-GG-----------G-CAG--C-G--G----------------G-----------GA-G-G-T-A----------------------GCA-A------------------------------T--A-C-T-T--CC-----------------G-C-C----G--GC--G-------AC-C-G-G-C-GC-A--C--G-GG--T--G-A-G-T-A-AC-A-C-G-T-A-TG---GAA-C-CT-G--C-C-CGT--AG-C----A-G-G-G-G-G---AT-AA-A--CG------------------G-A-A-…
>ICSZ4EG01A6FLV
G-A-T--G-A-A-C-G-C--T-G-G-C--G-G--T-C-T-G---C---T-T--AA-C--AC-A-T-G-C--A-A-G--T-C--GA-A-CG-G---------A-----------------------------------------------G-T-A--------------------GAA-A---------------------------T--A--C----------------------------------------T--T-------AG-T-G-G-C-GG-A--C--G-GG--T--G-A-G-T-A-AC-G-C-G-T-G-AG---A-A-T-CT-A--C-C-TTC--AG-G----A-C-G-G-A-G---AC-AA-C--AG------------------T-T-G-…
>ICSZ4EG01DOZXY
A-T-T--G-A-A-C-G-C--T-G-G-C--G-G--C-A-T-G---C---C-T--TA-C--AC-A-T-G-C--A-A-G--T-C--GA-A-CG-----------G-TAG-------C---------------------------------G-G-G----------------------TCC-T---------------------------T--C--G-G-------------------------G-A-T----GCCGAC-G-------AG-T-G-G-C-GA-A--C--G-GG--T--G-A-G-T-A-AT-A-T-A-T-C-GG---A-A-C-GT-G--C-C-CAG--TA-G----T-G-G-G-G-G---AT-AA-C--TG------------------C-T-C-…
>ICSZ4EG01DIXOI
G-A-T--G-A-A-C-G-C--T-A-G-C--G-G--C-A-G-G---C---T-T--AA-C--AC-A-T-G-C--A-A-G--T-C--GA-A-GG-----------G-CAT--C-G--C----------------G-----------GG-G-A-G-T-G--------------------CTT-G---------------------------C--A--C-T-C-C--CT-----------------G-G-C----G--GC--G-------AC-T-G-G-C-GC-A--C--G-GG--T--G-A-G-T-A-AC-A-C-G-T-A-TG---CAA-C-CT-G--C-C-CTC--CA-C----A-G-G-G-G-G---AC-AA-C--CT------------------T-C-C-…
>ICSZ4EG01D66FM
G-A-T--G-A-A-C-G-C--T-G-G-C--G-G--C-G-T-G---C---T-T--AA-C--AC-A-T-G-C--A-A-G--T-C--GA-A-CG-A---------T-G----A-A--C-----------------------------C-----T-C-A--------------------CTT-G---------------------------T--G--G-----G-----------------------T-G----G--AT--T-------AG-T-G-G-C-GA-A--C--G-GG--T--G-A-G-T-A-AC-A-C-G-T-G-AG---TAA-C-CT-G--C-C-CTT--GA-C----T-C-T-G-G-G---AT-AA-G--CC------------------T-G-G-…
>ICSZ4EG01CYLAO
G-A-C--G-A-A-C-G-C--T-G-G-C--G-G--C-G-T-G---C---T-T--AA-C--AC-A-T-G-C--A-A-G--T-C--GA-G-CG-----------G-TA---A-G--G-----------------------------C-C-----C-C--------------------TTC-G---------------------------G--G------G-G-----------------------T-A----C--AC--G-------AG-C-G-G-C-GA-A--C--G-GG--T--G-A-G-T-A-AC-A-C-G-T-G-AG---CAA-T-CT-A--C-C-CAT--CA-C----A-T-C-G-G-G---AT-AA-C--CT------------------C-G-G-…
>ICSZ4EG01AZJ8L
A-T-T--G-A-A-C-G-C--T-G-G-C--G-G--C-A-T-G---C---C-T--TA-C--AC-A-T-G-C--A-A-G--T-C--GA-A-CG-----------G-TA-----A--C---------------------------------G-G-G----------------------TCC-T---------------------------T--C--G-G-------------------------G-A-T----GCCGAC-G-------AG-T-G-G-C-GA-A--C--G-GG--T--G-A-G-T-A-AT-A-T-A-T-C-GG---A-A-C-GT-G--C-C-CAG--TA-G----T-G-G-G-G-G---AT-AA-C--TG------------------C-T-C-…
>ICSZ4EG01BVTCW
A-T-T--G-A-A-C-G-C--T-G-G-C--G-G--C-A-T-G---C---C-T--TA-C--AC-A-T-G-C--A-A-G--T-C--GA-A-CG-----------G-TAA--C-G--G-----------------------------------GTC-CT-------------------TCG-G---------------------------G--A--T---------------------------G-C-C----G--AC--G-------AG-T-G-G-C-GA-A--C--G-GG--T--G-A-G-T-A-AT-A-T-A-T-C-GG---A-A-C-GT-G--C-C-CAG--TA-G----T-G-G-G-G-G---AT-AA-C--TA------------------C-T-C-…
>ICSZ4EG01A1F1U
G-A-T--G-A-A-C-G-C--T-G-G-C--G-G--C-G-T-G---C---C-T--AA-C--AC-A-T-G-C--A-A-G--T-C--GA-A-CG-G---------A-GCCTTA-TCAG---------CAGAAG-------------CA-T-C-C-A-G-CTTG---------------CTG-G-----------AAGCGG----------A--A--G-A-A-----GA--AAAG-------------------G--CT--T-------AG-T-G-G-C-GG-A--C--G-GG--T--G-A-G-T-A-AC-G-C-G-T-G-GG---TAA-C-CT-G--G-C-CCA--TA-C----A-G-G-G-G-G---AT-AA-C--AC------------------T-T-A-…
>ICSZ4EG01EU421
G-A-C--G-A-A-C-G-C--T-G-G-C--G-T--C-G-T-G---C---T-T--TA-C--AC-A-T-G-C--A-A-G--T-C--GA-A-CA-----------A-TG---A-T--G---------------------------------C-C-CAG--------------------CTT-G---------------------------CT-G--G-G---------------------------T-T----G--AT--T-------AG-T-G-G-C-GA-A--C--G-GG--T--G-A-G-T-A-AC-A-C-G-T-G-AG---TAA-C-CT-G--C-C-CCA--GA-C----T-C-T-G-G-G---AT-AA-C--TC------------------C-G-G-…
>ICSZ4EG02HYB60
A-T-T--G-A-A-C-G-C--T-G-G-C--G-G--C-A-T-G---C---T-T--TA-C--AC-A-T-G-C--A-A-G--T-C--GA-A-CG-----------G-TA-----A--C---------------------------------A-G-G-T--------------------CTT-C---------------------------G--G--A-T-------------------------G-C-T----G--AC--G-------AG-T-G-G-C-GA-A--C--G-GG--T--G-A-G-T-A-AT-A-C-A-T-C-GG---A-A-C-GT-G--C-C-TAG--TA-G----T-G-G-G-G-G---AT-AA-C--TG------------------C-T-C-…
>ICSZ4EG01EO2F3
A-T-T--G-A-A-C-G-C--T-G-G-C--G-G--C-A-T-G---C---C-T--TA-C--AC-A-T-G-C--A-A-G--T-C--GA-A-CG-----------G-TAA--C-G--------------------------------------G-G-T--------------------CCT-T---------------------------CGGGA-T---------------------------G-C-C----G--AC--G-------AG-T-G-G-C-GA-A--C--G-GG--T--G-A-G-T-A-AT-A-T-A-T-C-GG---A-A-C-GT-G--C-C-CAG--TA-G----T-G-G-G-G-G---AT-AA-C--TG------------------C-T-C-…
>ICSZ4EG01EKAXL
A-A-C--G-A-A-C-G-C--T-G-G-C--G-G--C-A-G-G---C---T-T--AA-C--AC-A-T-G-C--A-A-G--T-C--GA-A-CG-A---------G-A-----------------------------------------------C-C--------------------TTC-G---------------------------G--G------------------------------------------TC--T-------AG-T-G-G-C-GC-A--C--G-GG--T--G-C-G-T-A-AC-G-C-G-T-G-GG---A-A-T-CT-G--C-C-CTT--GG-G----C-T-C-G-G-A---AT-AA-C--TC------------------G-C-C-…
>ICSZ4EG01EISL3
G-A-T--G-A-A-C-G-C--T-G-G-C--G-G--C-G-T-G---C---T-T--AA-C--AC-A-T-G-C--A-A-G--T-C--GA-A-CG-A---------A-G----C-G--A----------TCGGG-A-----------GG-A-A-G-T-T--------------------TTC-G---------------------------G--A--T-G-G-A--ATC--CGGA------------T-T----GA-CT--G-------AG-T-G-G-C-GG-A--C--G-GG--T--G-A-G-T-A-AC-G-C-G-T-G-GG---TAA-C-CT-G--C-C-TCA--TA-C----A-G-G-G-G-G---AT-AA-C--AG------------------T-T-A-…
>ICSZ4EG01EISGE
G-A-C--G-A-A-C-G-C--T-G-G-C--G-G--C-G-T-G---C---T-T--AA-C--AC-A-T-G-C--A-A-G--T-C--GA-G-CG-----------A-GG---C-C--C-------------------------------A---C-C-T--------------------TTC-G---------------------------G--G--G---T-------------------------G-G----T--GT--CCT-----AG-C-G-G-C-GA-A--C--G-GG--T--G-A-G-T-A-AC-A-C-A-T-G-GG---CAA-C-CT-G--C-C-CTC--AG-C----T-C-T-G-G-G---AT-AA-C--TC------------------C-A-A-…
>ICSZ4EG01EI2VC
A-A-C--G-A-A-C-G-C--T-G-G-C--G-G--C-A-G-G---C---T-T--AA-C--AC-A-T-G-C--A-A-G--T-C--GA-A-CG-----------G-CAG--C-A--C---------------------------------G---G-GCT------------------TCG-G---------------------------C--C----T-------------------------G-G-T----G--GC--G-------AG-T-G-G-C-GA-A--C--A-GG--T--G-A-G-T-A-AT-A-C-A-T-C-GG---A-A-C-GT-A--C-C-CAG--GA-G----T-G-G-G-G-G---AT-AA-C--GT------------------A-G-C-…
>ICSZ4EG01EGBL8
G-A-T--G-A-A-C-G-C--T-A-G-C--G-G--G-A-G-G---C---C-T--AA-C--AC-A-T-G-C--A-A-G--C-C--GA-G-CG-G---------T-A----T-T--G---------------------------------T-T-T-C--------------------TTC-G---------------------------G--A--A-A---------------------------T-G----A--GA--G-------AG-C-G-G-C-GT-G--C--G-GG--T--G-C-G-G-A-AC-A-C-G-T-G-TG---CAA-C-CT-G--C-C-TTT--AT-C----T-G-G-G-G-G---ATAGG-C--CT------------------T-T-C-…
>ICSZ4EG01ECWKB
A-T-T--G-A-A-C-G-C--T-G-G-C--G-G--C-A-T-G---C---C-T--TA-C--AC-A-T-G-C--A-A-G--T-C--GA-A-CG-----------G-TAA--C-A--G-----------------------------------G-T-C--------------------TTC-G---------------------------G--A--T---------------------------G-C-T----G--AC--G-------AG-T-G-G-C-GA-A--C--G-GG--T--G-A-G-T-A-AT-A-C-A-T-C-GG---A-A-C-GT-G--C-T-CGA--CC-G----T-G-G-G-G-G---AT-AA-C--GA------------------A-G-C-…
>ICSZ4EG01EAWMU
A-T-T--G-A-A-C-G-C--T-G-G-C--G-G--C-A-T-G---C---C-T--TA-C--AC-A-T-G-C--A-A-G--T-C--GA-A-CG-----------G-TAA--C-G--G-----------------------------------G-T-CT-------------------TTCGG---------------------------G--A--T---------------------------G-C-C----G--AC--G-------AG-T-G-G-C-GA-A--C--G-GG--T--G-A-G-T-A-AT-A-C-A-T-C-GG---A-A-C-GT-G--C-C-CGA--TC-G----T-G-G-G-G-G---AT-AA-C--GA------------------G-G-C-…
>ICSZ4EG01EAJUL
A-T-T--G-A-A-C-G-C--T-G-G-C--G-G--C-A-T-G---C---C-T--TA-C--AC-A-T-G-C--A-A-G--T-C--GA-A-CG-----------G--TG----A--C---------------------------------G-G-G----------------------TCC-T---------------------------T--C--G-G-------------------------G-A-T----GCCGAC-G-------AG-T-G-G-C-GA-A--C--G-GG--T--G-A-G-T-A-AT-A-T-A-T-C-GG---A-A-C-GT-G--C-C-CAG--TA-G----T-G-G-G-G-G---AT-AA-C--TG------------------C-T-C-…
>ICSZ4EG01E0L1G
G-A-T--G-A-A-C-G-C--T-A-G-C--G-A--C-A-G-G---C---T-T--AA-C--AC-A-T-G-C--A-A-G--T-C--GA-G-GG-----------G-CAG--C-G--G----------------G-----------GC-G-G-C-A-GG-------------------CTT-G----------------C----------C--T--G-C-C-G--TT-----------------G-C-C----G--GC--G-------AC-C-G-G-C-GC-A--C--G-GG--T--G-A-G-T-A-AC-A-C-G-T-A-TG---CAA-C-CT-G--C-C-CGT--GG-C----A-G-G-G-G-G---AT-AA-G--CG------------------G-G-G-…
>ICSZ4EG01DY73C
A-T-T--G-A-A-C-G-C--T-G-G-C--G-G--C-A-T-G---C---C-T--TA-C--AC-A-T-G-C--A-A-G--T-C--GA-A-CG-----------G-TA-----A--C---------------------------------G-G-G----------------------TCC-T---------------------------T--C--G-G-------------------------G-A-T----GCCGAC-G-------AG-T-G-G-C-GA-A--C--G-GG--T--G-A-G-T-A-AT-A-T-A-T-C-GG---A-A-C-GT-G--C-C-CAG--TA-G----T-G-G-G-G-G---AT-AA-C--TG------------------C-T-C-…
>ICSZ4EG01DX6K0
G-AGC--G-A-A-C-G-C--T-G-G-C--G-G--C-A-G-G---C---T-T--AA-C--AC-A-T-G-C--A-A-G--T-C--GA-G-GG-----------G-CAG--C-G--G----------------G-----------GC-GAG-T------------------------GCTTG------------------------------C--A-C-TCG--CT-----------------G-C-C----G--GC--G-------AC-C-G-G-C-GC-A--C--G-GG--T--G-A-G-T-A-AC-A-C-G-T-A-TG---GAA-C-CT-G--C-C-CGC--AG-C----A-G-G-G-G-G---AT-AA-G--CG------------------G-A-A-…
>ICSZ4EG01DLK1S
A-A-C--G-A-A-C-G-C--T-G-G-C--G-G--C-A-T-G---C---C-T--AA-C--AC-A-T-A-C--A-A-G--T-C--GA-A-CG-G---------G-A-----------------------------------------------C-C--------------------TTC-G---------------------------G--G------------------------------------------TC--T-------AG-T-G-G-C-GC-A--C--G-GG--T--G-C-GTT-A-AC-G-C-G-T-G-GG---A-A-T-CT-G--C-C-CTT--GG-G----T-T-C-G-G-A---AT-AA-C--TC------------------G-C-C-…
>ICSZ4EG01DJHM7
A-T-G--G-A-A-C-G-C--T-G-G-C--G-G--T-A-T-G---C---C-T--TA-C--AC-A-T-G-C--A-A-G--T-C--GA-A-CG-----------G-TA-----A--C---------------------------------G-G-G----------------------TCC-T---------------------------T--C--G-G-------------------------G-A-T----GCCGAC-G-------AG-T-G-G-C-GA-A--C--G-GG--T--G-A-G-T-A-AT-A-T-A-T-C-GG---A-A-C-GT-G--C-C-CAG--TA-G----T-G-G-G-G-G--AGT-AA-C--TG------------------C-T-C-…
>ICSZ4EG01DJEY0
A-A-C--G-A-A-C-G-C--T-G-G-C--G-G--C-A-G-G---C---T-T--AA-C--AC-A-T-G-C--A-A-G--T-C--GA-G-CG-C---------C-C-------------------------------------------------C--------------------GCA-A---------------------------G---------------------------------------------GG--G-------AG-C-G-G-C-AG-A--C--G-GG--T--G-A-G-T-A-AC-G-C-G-T-G-GG---A-A-T-CT-A--C-C-CAT--CT-C----T-A-C-G-G-A---AT-AA-C--GC------------------A-T-G-…
>ICSZ4EG01DHYQ3
A-T-T--G-A-A-C-G-C--T-G-G-C--G-G--C-A-T-G---C---C-T--TA-C--AC-A-T-G-C--A-A-G--T-C--GA-A-CG-----------G-TA-----A--C---------------------------------G-G-G----------------------TCC-T---------------------------T--CGGA-T-------------------------G-C-C----G--AC--G-------AG-T-G-G-C-GA-A--C--G-GG--T--G-A-G-T-A-AT-A-T-A-T-C-GG---A-A-T-GT-G--C-C-CAG--TA-G----T-G-G-G-G-G---AT-AA-C--TG------------------C-T-C-…
>ICSZ4EG01DH3NE
A-T-T--G-A-A-C-G-C--T-G-G-C--G-G--C-A-T-G---C---C-T--TA-C--AC-A-T-G-C--A-A-G--T-C--GA-A-CG-----------G-TAA--C-A--G-----------------------------------G-T-C--------------------TTC-G---------------------------G--A--T---------------------------G-C-T----G--AC--G-------AG-T-G-G-C-GA-A--C--G-GG--T--G-A-G-T-A-AT-A-C-A-T-C-GG---A-A-C-GT-G--C-C-CGA--TC-G----T-G-G-G-G-G--AGT-AA-C--GA------------------A-G-C-…
>ICSZ4EG01DG3LU
A-A-C--G-A-A-C-G-C--T-G-G-C--G-G--C-A-G-G---C---T-T--AA-C--AC-A-T-G-C--A-A-G--T-C--GA-A-CG-----------G-TAA--C-A--G-----------------------------------G-T-C--------------------TTC-G---------------------------G--A--T---------------------------G-C-T----G--AC--G-------AG-T-G-G-C-GA-A--C--G-GG--T--G-A-G-T-A-AT-A-C-A-T-C-GG---A-A-C-GT-G--C-C-CGA--TC-G----T-G-G-G-G-G---AT-AA-C--GA------------------G-G-C-…
>ICSZ4EG01DFBPZ
A-T-T--G-A-A-C-G-C--T-G-G-C--G-G--C-A-T-G---C---C-T--TA-C--AC-A-T-G-C--A-A-G--T-C--GA-A-CG-----------G-TA-----A--C---------------------------------G-G-G----------------------TCC-T---------------------------T--C--G-G-------------------------G-A-T----GCCGAC-G-------AG-T-G-G-C-GA-A--C--G-GG--T--G-A-G-T-A-AT-A-T-A-T-C-GG---A-A-C-GT-G--C-C-CAG--TA-G----T-G-G-G-G-G---AT-AA-C--TG------------------C-C-C-…
>ICSZ4EG01DEOB9
G-A-T--G-A-G-C-G-C--T-A-G-C--G-A--C-A-G-G---C---T-T--AA-C--AC-A-T-G-C--A-A-G--T-C--GA-G-GG-----------G-CAG--C-G--G----------------G-----------GC-GAG-T------------------------GCTTG------------------------------C--A-C-TCG--CT-----------------G-C-C----G--GC--G-------AC-C-G-G-C-GC-A--C--G-GG--T--G-A-G-T-A-AC-A-C-G-T-A-TG---GAA-C-CT-G--C-C-CGC--AG-C----A-G-G-G-G-G---AT-AA-G--CG------------------G-A-A-…
>ICSZ4EG01DBCMN
A-A-C--G-A-A-C-G-C--T-G-G-C--G-G--C-A-T-G---C---C-T--TA-C--AC-A-T-G-C--A-G-G--T-C--GA-A-CG-----------G-TAA--C-A--G-----------------------------------G-T-C--------------------TTC-G---------------------------G--A--T---------------------------G-C-T----G--AC--G-------AG-T-G-G-C-GA-A--C--G-GG--T--G-A-G-T-A-AT-A-C-A-T-C-GG---A-A-C-GT-G--C-C-CGA--TC-G----T-G-G-G-G-G---AT-AA-C--GA------------------G-G-C-…
>ICSZ4EG01DB4OS
A-A-C--G-A-A-C-G-C--T-G-G-C--G-G--C-A-T-G---C---C-T--AA-C--AC-A-T-G-C--A-A-G--T-C--GA-A-CG-A---------G-A-----------------------------------------------C-C--------------------TTC-G---------------------------G--G------------------------------------------TC--T-------AG-T-G-G-C-GC-A--C--G-GG--T--G-C-G-T-A-AC-G-C-G-T-G-GG---A-A-T-CT-G--C-C-CTT--GG-G----T-T-C-G-G-A---AT-AA-C--AG------------------C-T-A-…
>ICSZ4EG01D9ZAT
A-T-T--G-A-A-C-G-C--T-G-G-C--G-G--C-A-T-G---C---C-T--TA-C--AC-A-T-G-C--A-A-G--T-C--GA-A-CG-----------G-TAA--C-A--G-----------------------------------G-T-C--------------------TTC-G---------------------------G--A--T---------------------------G-C-T----G--AC--G-------AG-T-G-G-C-GA-A--C--G-GG--T--G-A-G-T-A-AT-A-C-A-T-C-GG---A-A-C-GT-G--C-C-CAG---C-G----T-G-G-G-G-G---AT-AA-C--GA--------------------G-C-…
>ICSZ4EG01BYOLT
A-T-T--G-A-A-C-G-C--T-G-G-C--G-G--C-A-T-G---C---C-T--TA-C--AC-A-T-G-C--A-A-G--T-C--GA-A-CG-----------G-TAA--C-G--G-----------------------------------G-TCC--------------------TTCGG---------------------------G--A--T---------------------------G-C-C----G--AC--G-------AG-T-G-G-C-GA-A--C--G-GG--T--G-A-G-T-A-AT-A-T-A-T-C-GG---A-A-C-GT-G--C-C-CAG--TA-G----T-G-G-G-G-G---AT-AA-C--TG------------------C-T-C-…
>ICSZ4EG01D90JU
G-A-T--G-A-A-C-G-C--T-A-G-C--G-G--G-A-G-G---C---C-T--AA-C--AC-A-T-G-C--A-A-G--C-C--GA-G-CG-G---------T-A----T-T--G---------------------------------T-T-T-C--------------------TTC-G---------------------------G--A--A-A---------------------------T-G----A--GA--G-------AG-C-G-G-C-GT-A--C--G-GG--T--G-C-G-G-A-AC-A-C-G-T-G-TG---CAA-C-CT-G--C-C-TTT--AT-C----C-G-G-G-G-G---AT-AG-T--CT------------------T-T-C-…
>ICSZ4EG01D6DCW
A-A-C--G-A-G-C-G-C--T-G-G----G-G--C-A-T-G---C---C-T--AA-C--AC-A-T-G-C--A-A-G--T-C--GA-A-CG-A---------G-A-----------------------------------------------C-C--------------------TTC-G---------------------------G--G------------------------------------------TC--T-------AG-T-G-G-C-GC-A--C--G-GG--T--G-C-G-T-A-AC-G-C-G-T-G-GG---A-A-T-CT-G--C-C-CTT--GG-G----T-T-C-G-G-A---AT-AA-C--TC------------------G-C-C-…
>ICSZ4EG01D5QUU
A-G-C--G-A-A-C-G-C--T-G-G-C--G-G--C-A-G-G---C---T-T--AA-C--AC-A-T-G-C--A-A-G--T-C--GA-A-CG-G---------G-C-----------------------------------------------A-C--------------------TTC-G---------------------------G--T------------------------------------------GT--C-------AG-T-G-G-C-AG-A--C--G-GG--T--G-A-G-T-A-AC-A-C-G-T-G-GG---A-A-C-GT-A--C-C-TCT--TG-G----T-T-C-G-G-A---AC-AA-C--AC------------------A-G-G-…
>ICSZ4EG01D5MWM
A---T--G-A-A-C-G-C--T-A-G-C--G-G--G-A-G-G---C---C-T--AA-C--AC-A-T-G-C--A-A-G--C-C--GA-G-CG-----------G-TA-----A--C---------------------------------G-G-G----------------------TCC-T---------------------------T--C--G-G-------------------------G-A-T----GCCGAC-G-------AG-T-G-G-C-GA-A--C--G-GG--T--G-A-G-T-A-AT-A-T-A-T-C-GG---A-A-C-GT-G--C-C-CAG--TA-G----T-G-G-G-G-G---AT-AA-C--TG------------------C-T-C-…
>ICSZ4EG01D5B38
A-T-T--G-A-A-C-G-C--T-G-G-C--G-G--C-A-T-G---C---C-T--TA-C--AC-A-T-G-C--A-A-G--T-C--GA-A-CG-----------G-TA-----A--C---------------------------------G-G-G----------------------TCC-T---------------------------T--C--G-G------------------------GACGCC----G--AC--G-------AG-T-G-G-C-GA-A--C--G-GG--T--G-A-G-T-A-AT-A-T-A-T-C-GG---A-A-C-GT-G--C-C-CAG--TA-G----T-G-G-G-G-G---AT-AA-C--CG------------------C-T-C-…
>ICSZ4EG01D4CM3
A-T-T--G-A-A-C-G-C--T-G-G-C--G-G--C-A-T-G---C---C-T--AA-C--AC-A-T-G-C--A-A-G--T-C--GA-A-CG-A---------G-A-----------------------------------------------C-C--------------------TTC-G---------------------------G--G------------------------------------------TC--T-------AG-T-G-G-C-GC-A--C--G-GG--T--G-C-G-T-A-AC-G-C-G-T-G-GG---A-A-T-CT-G--C-C-CTT--GG-G----T-C-C-G-G-A---AT-AA-C--TC------------------G-C-C-…
>ICSZ4EG01D3M62
A-A-C--G-A-A-C-G-C--T-G-G-C--G-G--C-A-T-G---C---C-T--AA-C--AC-A-T-G-C--A-A-G--C-C--GA-G-CG-G---------T-A----T-T--G---------------------------------T-T-T-C--------------------TTC-G---------------------------G--A--A-A---------------------------T-G----A--GA--G-------AG-C-G-G-C-GT-A--C--G-GG--T--G-C-G-G-A-AC-A-C-G-T-G-TG---CAA-C-CT-G--C-C-TTT--AT-C----T-G-G-G-G-G---AT-AG-C--CT------------------T-T-C-…
>ICSZ4EG01CWDRO
A-T-T--G-A-A-C-G-C--T-G-G-C--G-G--C-A-T-G---C---C-T--TG-C--AC-A-T-G-C--A-A-G--T-C--GA-A-CG-----------G-TA-----A--C---------------------------------G-G-G----------------------TCC-T---------------------------T--C--G-G-------------------------G-A-T----GCCGAC-G-------AG-T-G-G-C-GA-A--C--G-GG--T--G-A-G-T-A-AT-A-T-A-T-C-GG---A-A-C-GT-G--C-C-CAG--TA-G----T-G-G-G-G-G---AT-AA-C--TG------------------C-T-C-…
>ICSZ4EG01BZG3X
A-T-T--G-A-A-C-G-C--T-G-G-C--G-G--C-A-T-G---C---C-T--TA-C--AC-A-T-G-C--A-A-G--T-C--GA-A-CG-----------G-TAA--C-G--G-----------------------------------G-TCC--------------------TTCGG---------------------------G--A--T---------------------------G-C-C----G--AC--G-------AG-T-G-G-C-GA-A--C--G-GG--T--G-A-G-T-A-AT-A-C-A-T-C-GG---A-A-C-GT-G--C-C-CAG--GC-G----T-G-G-G-G-G---AT-AA-C--GA------------------G-G-C-…
>ICSZ4EG01CSAT7
A-T-T--G-A-A-C-G-C--T-G-G-C--G-G--C-A-T-G---C---C-T--TA-C--AC-A-T-G-C--A-A-G--T-C--GA-A-CG-----------G-TA-----A--C---------------------------------G-G-G----------------------TCC-T---------------------------T--C--G-G------------------------GACGCC----G--AC--G-------AG-T-G-G-C-GA-A--C--G-GG--T--G-A-G-T-A-AT-A-T-A-T-C-GG---A-A-C-GT-G--C-C-CAG--TA-G----T-G-G-G-G-G--AGT-AA-C--TG------------------C-T-C-…
>ICSZ4EG01CQ8KA
A-A-C--G-A-A-C-G-C--T-G-G-C--G-G--C-A-G-G---C---T-T--AA-C--AC-A-T-G-C--A-A-G--T-C--GA-G-CG-C---------C-C-------------------------------------------------C--------------------GCA-A---------------------------G---------------------------------------------GG--G-------AG-C-G-G-C-AG-A--C--G-GG--T--G-A-G-T-A-AC-G-C-G-T-G-GG---A-A-T-CT-A--C-C-CAT--CA-C----T-A-C-G-G-A---AC-AA-C--TC------------------C-G-G-…
>ICSZ4EG01CN7VH
A-T-T--G-A-A-C-G-C--G-G-G-C--G-G--C-A-T-G---C---C-T--TA-C--AC-A-T-G-C--A-A-G--T-C--GA-A-CG-----------G-TAA--C-A--G-----------------------------------G-T-C--------------------TTC-G---------------------------G--A--T---------------------------G-C-T----G--AC--G-------AG-T-G-G-C-GA-A--C--G-GG--T--G-A-G-T-A-AT-A-C-A-T-C-GG---A-A-C-GT-G--C-C-CAG--AC-G----T-G-G-G-G-G---AT-AA-C--GA------------------G-G-C-…
>ICSZ4EG01CLHWK
A-A-C--G-A-A-C-G-C--T-G-G-T--G-G--C-A-T-G---C---C-C--AA-C--AC-A-T-G-C--A-A-G--T-C--GA-A-CG-A---------G-G-----------------------------------------------C-C--------------------TTC-G---------------------------G--G------------------------------------------TC--T-------AG-T-G-G-C-GC-A--C--G-GG--T--G-C-G-T-A-AC-G-C-G-T-G-GG---A-A-T-CT-G--C-C-CTT--GG-G----T-T-C-G-G-A---AT-AA-C--TC------------------G-C-C-…
>ICSZ4EG01CKT3W
T---T--G-A-A-C-G-C--T-G-G-C--G-G--C-A-T-G---C---C-T--TA-C--AC-A-T-G-C--A-A-G--T-C--GA-A-CG-----------G-TAA--C-A--G-----------------------------------G-T-C--------------------TTC-G---------------------------G--A--T---------------------------G-C-T----G--AC--G-------AG-T-G-G-C-GA-A--C--G-GG--T--G-A-G-T-A-AT-A-C-A-T-C-GG---A-A-C-GT-G--C-C-CGA--TC-G----T-G-G-G-G-G---AT-AA-C--GA------------------G-G-C-…
>ICSZ4EG01CK1VK
A-T-T--G-A-A-C-G-C--T-G-G-C--G-G--C-A-T-G---C---C-T--TA-C--AC-A-T-G-C--A-A-G--T-C--GA-A-CG-----------G-TAA--C-G--G-----------------------------------G-TCC--------------------TTCGG---------------------------G--A--T---------------------------G-C-C----G--AC--G-------AG-T-G-G-C-GA-A--C--G-GG--T--G-A-G-T-A-AT-A-C-A-T-C-GG---A-A-C-GT-G--C-C-CAG--AC-G----T-G-G-G-G-G---AT-AA-C--GA------------------G-G-C-…
>ICSZ4EG01CAWNN
G-A-C--G-A-A-C-G-C--T-G-G-C--G-G--C-G-T-G---C---T-T--AA-C--AC-A-T-G-C--A-A-G--T-C--GA-A-CG-G---------A-G----C-A--C----------CCCTG-A-----------AG-G-A-G-T-T--------------------TTC-G---------------------------G--A--C-A-A-C--GGA--TGGG----------A-A-T----G--CT--T-------AG-T-G-G-C-GG-A--C--T-GG--T--G-A-G-T-A-AC-G-C-G-T-G-AG---GAA-C-CT-G--C-C-TTC--CA-G----A-G-G-G-G-G---AC-AA-C--AG------------------T-T-G-…
>ICSZ4EG01C9UGG
A-A-C--G-A-A-C-G-C--T-G-G-C--G-G--C-A-T-G---C---C-T--AA-C--AC-A-T-G-C--A-A-G--T-C--GA-A-C------------G--AG----A--C---------------------------------C-T-T-C--------------------GGG-A-----------------------------------T-------------------------G-C-C----G--AC--G-------AG-T-G-G-C-GA-A--C--G-GG--T--G-A-G-T-A-AT-A-T-A-T-C-GG---A-A-C-GT-G--C-C-CAG--TA-G----T-G-G-G-G-G---AT-AA-C--TG------------------C-T-C-…
>ICSZ4EG01C9P6W
A-T-T--G-A-A-C-G-C--T-G-G-C--G-G--C-A-T-G---C---C-T--TA-C--AC-A-T-G-C--A-A-G--T-C--GA-A-CG-----------G-TAA--C-G--G-----------------------------------G-TCC--------------------TTCGG---------------------------G--A--T---------------------------G-C-C----G--AC--G-------AG-T-G-G-C-GA-A--C--G-GG--T--G-A-G-T-A-AT-A-C-A-T-C-GG---A-A-C-GT-G--C-C-CGA--TC-G----T-G-G-G-G-G---AT-AA-C--GA------------------A-G-C-…
>ICSZ4EG01C9HOR
A-A-C--G-A-A-C-G-C--T-G-G-C--G-G--C-A-T-G---C---T-T--GA-C--AC-A-T-G-C--A-A-G--T-C--GA-A-CG-A---------G-A-----------------------------------------------C-C--------------------TTC-G---------------------------G--G------------------------------------------TC--T-------AG-T-G-G-C-GC-A--C--G-GG--T--G-C-G-T-A-AC-G-C-G-T-G-GG---A-A-T-CT-G--C-C-CTT--GG-G----T-T-C-G-G-A---AT-AA-C--TC------------------G-C-C-…
>ICSZ4EG01C9GG2
A-T-T--G-A-A-C-G-C--T-G-G-C--G-G--C-A-T-G---C---C-T--TA-C--AC-A-T-G-C--A-A-G--T-C--GA-A-CG-----------G-TA-----A--C---------------------------------G-G-G----------------------TCC-T---------------------------T--C--G-G-------------------------G-A-T----GCCGAC-G-------AG-T-G-G-C-GA-A--C--G-GG--T--G-A-G-T-A-AT-A-T-A-T-C-GG---A-A-C-GT-G--C-C-CAG--TA-G----T-G-G-G-G-G---AT-AA-C--TA------------------C-T-C-…
>ICSZ4EG01C587Q
A-T-T--G-A-A-C-G-C--T-A-G-C--G-G--G-A-G-G---C---C-T--AA-C--AC-A-T-G-C--A-A-G--T-C--GA-A-CG-----------G-TA-----A--C---------------------------------G-G-G----------------------TCC-T---------------------------T--C--G-G-------------------------G-A-T----GCCGAC-G-------AG-T-G-G-C-GA-A--C--G-GG--T--G-A-G-T-A-AT-A-T-A-T-C-GG---A-A-C-GT-G--C-C-CAG--TA-G----T-G-G-G-G-G---AT-AA-C--TG------------------C-T-C-…
>ICSZ4EG01C56J0
G-A-T--G-A-A-C-G-C--T-A-G-C--G-G--G-A-G-G---C---C-T--AA-C--AC-A-T-G-C--A-A-G--C-C--GA-G-CG-G---------T-A----T-T--G---------------------------------T-T-T-C--------------------TTC-G---------------------------G--A--A-A---------------------------T-G----A--GA--G-------AG-C-G-G-C-GT-A--C--G-GG--T--G-C-A-G-A-AC-A-C-G-T-G-TG---CAA-C-CT-G--C-C-TTT--AT-C----T-G-G-G-G-G---AT-AG-C--CT------------------T-T-C-…
>ICSZ4EG01C4ZZM
A-A-C--G-A-A-C-G-C--T-G-G-C--G-G--C-A-T-G---C---C-T--AA-C--AC-A-T-G-C--A-A-G--T-C--GA-A-CG-A---------G-A-----------------------------------------------C-C--------------------TTC-G---------------------------G--G------------------------------------------TC--T-------AG-T-G-G-C-GC-A--C--G-GG--T--G-C-G-T-A-AC-G-C-G-T-G-GG---A-A-T-CT-A--C-C-CCT--TG-G----T-T-C-G-G-A---AT-AA-C--TC------------------A-G-A-…
>ICSZ4EG01C4TDB
A-T-T--G-A-A-C-G-C--T-G-G-C--G-G--C-A-T-G---C---C-T--TA-C--AC-A-T-G-C--A-A-G--T-C--GA-A-CG-----------G-TA-----A--C---------------------------------G-G-G----------------------CCC-T---------------------------T--C--G-G-------------------------G-A-T----GCCGAC-G-------AG-T-G-G-C-GA-A--C--G-GG--T--G-A-G-T-A-GT-A-T-A-T-C-GG---A-A-C-GT-G--C-C-CAG--TA-G----T-G-G-G-G-G---AT-AA-C--TG------------------C-T-C-…
>ICSZ4EG01C2H2S
A-T-T--G-A-A-C-G-C--T-G-G-C--G-G--C-A-T-G---C---C-T--TA-C--AC-A-T-G-C--A-A-G--T-C--GA-A-CG-----------G-TAA--C-A--G-----------------------------------G-T-C--------------------TTC-G---------------------------G--A--T---------------------------G-C-T----G--AC--G-------AG-T-G-G-C-GA-A--C--G-GG--C--G-A-G-T-A-AT-A-C-A-T-C-GG---A-A-C-GT-G--C-C-CAG--AC-G----T-G-G-G-G-G---GT-AA-C--GA------------------G-G-C-…
>ICSZ4EG01BSZIS
A-T-T--G-A-A-C-G-C--T-G-G-C--G-G--C-A-T-G---C---C-T--TA-C--AC-A-T-G-C--A-A-G--T-C--GA-A-CG-----------G-TA-----A--C---------------------------------G-G-G----------------------TCC-T---------------------------T--C--G-G-------------------------G-A-T----GCCGAC-G-------AG-T-G-G-C-GA-A--C--G-GG--T--G-A-G-T-A-AT-A-T-A-T-C-GG---A-A-C-GT-G--C-C-CAG--TA-G----T-G-G-G-G-G---AT-AA-C--TG------------------C-T-C-…
>ICSZ4EG01BQL4E
A-T-T--G-A-A-C-G-C--T-G-G-C--G-G--C-A-T-G---C---C-T--TA-C--AC-A-T-G-C--A-A-G--T-C--GA-A-CG-----------G-TA-----A--C---------------------------------G-G-G----------------------TCC-T---------------------------T--C--G-A-------------------------G-A-T----GCCGAC-G-------AG-T-G-G-C-GA-A--C--G-GG--T--G-A-G-T-A-AT-A-T-A-T-C-GG---A-A-C-GT-G--C-C-CAG--TA-G----T-G-G-G-G-G---AT-AA-C--TG------------------C-T-C-…
>ICSZ4EG01B7R2R
A-T-T--G-A-A-C-G-C--T-G-G-C--G-G--C-A-T-G---C---C-T--TA-C--AC-A-T-G-C--A-A-G--T-C--GA-A-CG-----------G-TAA--C-G------------------------------------G---G-T--------------------CCT-T---------------------------CGGGA---T-------------------------G-C-C----G--AC--G-------AG-T-G-G-C-GA-A--C--G-GG--T--G-A-G-T-A-AT-A-C-A-T-C-GG---A-A-C-GT-A--C-C-CAG--AA-G----T-G-G-G-G-G---AT-AA-C--GT------------------A-G-C-…
>ICSZ4EG02GZAM9
A-T-T--G-A-A-C-G-C--T-G-G-C--G-G--C-A-T-G---C---C-T--TA-C--AC-A-T-G-C--A-A-G--T-C--GA-A-CG-----------G-TAA--C-G--G-----------------------------------G-TCC--------------------TTCGG---------------------------G--A--T---------------------------G-C-C----G--AC--G-------AG-T-G-G-C-GA-A--C--G-GG--T--G-A-G-T-A-AT-A-T-A-T-C-GG---A-A-C-GT-G--C-C-CAG--GC-G----T-G-G-G-G-G---AT-AA-C--GA------------------G-G-C-…
>ICSZ4EG01BLJPA
G-A-C--G-A-A-C-G-C--T-G-G-C--G-G--C-G-T-G---C---T-T--AA-C--AC-A-T-G-C--A-A-G--T-C--GA-G-CG-----------G-TA---A-G--G-----------------------------C-C-----C-C--------------------TTC-G---------------------------G--G--------G-----------------------T-A----CG-AC--G-------AG-C-G-G-C-GA-A--C--G-GG--T--G-A-G-T-A-AC-A-C-G-T-G-AG---CAA-T-CT-A--C-C-CAT--CA-C----A-T-C-G-G-G---AT-AA-C--CT------------------C-G-G-…
>ICSZ4EG01BK476
A-T-T--G-A-A-C-G-C--T-G-G-C--G-G--C-A-T-G---C---C-T--TA-C--AC-A-T-G-C--A-A-G--T-C--GA-A-CG-----------G-CA-----A--C---------------------------------G-G-G----------------------TCC-T---------------------------T--C--G-G-------------------------G-A-T----GCCGAC-G-------AG-T-G-G-C-GA-A--C--G-GG--T--G-A-G-T-A-AT-A-T-A-T-C-GG---A-A-C-GT-G--C-C-CAG--TA-G----T-G-G-G-G-G---AT-AA-C--TG------------------C-T-C-…
>ICSZ4EG01BIH57
A-A-C--G-A-A-C-G-C--T-G-G-C--G-G--C-A-T-G---C---C-T--AA-C--AC-A-T-G-C--A-A-G--T-C--GA-A-CG-----------G-TAA--C-A--G-----------------------------------G-T-C--------------------TTC-G---------------------------G--A--T---------------------------G-C-T----G--AC--G-------AG-T-G-G-C-GA-A--C--G-GG--T--G-A-G-T-A-AT-A-C-A-T-C-GG---A-A-C-GT-G--C-C-CGA--TC-G----T-G-G-G-G-G---AT-AA-C--GA------------------A-G-C-…
>ICSZ4EG01BGYYY
A-T-T--G-A-A-C-G-C--T-G-G-C--G-G--C-A-T-G---C---C-T--TA-C--AC-A-T-G-C--A-A-G--T-C--GA-A-CG-----------G-TA-----A--C---------------------------------G-G-G-T--------------------CCT-T---------------------------TGGG--A-T-------------------------G-C-C----G--AC--G-------AG-T-G-G-C-GA-A--C--G-GG--T--G-A-G-T-A-AT-A-T-A-T-C-GG---A-A-C-GT-G--C-C-CAG--TA-G----T-G-G-G-G-G---AT-AA-C--TG------------------C-T-C-…
>ICSZ4EG01BAXFD
A-T-T--G-A-A-C-G-C--T-G-G-C--G-G--C-A-T-G---C---C-T--TA-C--AC-A-T-G-C--A-A-G--T-C--GA-A-CG-----------G-TA-----A--C---------------------------------G-G-G----------------------TCC-T---------------------------T--C--G-G-------------------------G-A-T----GCCGAC-G-------AG-T-G-G-C-GA-A--C--G-GG--T--G-A-G-T-A-AT-A-T-A-T-C-GG---A-A-C-GT-G--C-C-CAG--TA-G----T-G-G-G-G-G---AT-AA-C-TGG------------------C-T-C-…
>ICSZ4EG01BAJ3N
A-T-T--G-A-A-C-G-C--T-G-G-C--G-G--C-A-T-G---C---C-T--TA-C--AC-A-T-G-C--A-A-G--T-C--GA-A-CG-----------G-TAA--C-A--G-----------------------------------G-T-C--------------------TTC-G---------------------------G--A--T---------------------------G-C-T----G--AC--G-------AG-T-G-G-C-GA-A--C--G-GG--T--G-A-G-T-A-AT-A-C-A-T-C-GG---A-A-C-GT-G--C-C-CAG--GC-G----T-G-G-G-G-G---AT-AA-C--GA------------------G-G-C-…
>ICSZ4EG01B59FK
A-T-T--G-A-A-C-G-C--T-G-G-C--G-G--C-A-T-G---C---C-T--TA-C--AC-A-T-G-C--A-A-G--T-C--GA-A-CG-----------G-TAA--C-A--G-----------------------------------G-T-C--------------------TTC-G---------------------------G--A--T---------------------------G-C-T----G--AC--G-------AG-T-G-G-C-GA-A--C--G-GG--T--G-A-G-T-A-AT-A-C-A-T-C-GG---A-A-C-GT-G--C-C-CGA--CC-G----T-G-G-G-G-G---AT-AA-C--GA------------------A-G-C-…
>ICSZ4EG01B1V1P
A-G-C--G-A-A-C-G-C--T-G-G-C--G-G--C-A-G-G---C---T-T--AA-C--AC-A-T-G-C--A-A-G--T-C--GA-G-CG-G---------G-C---------------------------------------------A-T-A--------------------GCA-A---------------------------T--A--T---------------------------------------GT--C-------AG-C-G-G-C-AG-A--C--G-GG--T--G-A-G-T-A-AC-G-C-G-T-G-GG---A-A-C-GT-A--C-C-TTT--TG-G----T-T-C-G-G-A---AC-AA-C--TG------------------A-G-G-…
>ICSZ4EG01AVP3M
A-T-T--G-A-A-C-G-C--T-G-G-C--G-G--C-A-T-G---C---C-T--TA-C--AC-A-T-G-C--A-A-G--T-C--GA-A-CG-----------G-TA-----A--C---------------------------------G-G-G----------------------TCC-T---------------------------T--C--G-G-------------------------G-A-T----GCCGAC-G-------AG-T-G-G-C-GA-A--C--G-GG--T--G-A-G-T-A-AT-A-T-A-T-C-GG---A-A-C-GT-G--C-C-CAG--TA-G----T-G-G-G-G-G---AT-AA-C--TG------------------C-T-C-…
>ICSZ4EG01AQE62
G-A-T--G-A-A-C-G-C--T-G-G-C--G-G--C-G-T-G---C---C-T--AA-C--AC-A-T-G-C--A-A-G--T-C--GA-A-CG-G---------A-G---------C----------CTA-A-T-----------CA-G-CAG-A--AGCGG---------------CCA-G------------C-TTG----------C--TG-G-A-A-G-CGGA-AGCAGAA----------A-AG---G--CT--T-------AG-T-G-G-C-GG-A--C--G-GG--T--G-A-G-T-A-AC-G-C-G-T-G-GG---TAA-C-CT-G--G-C-CCA--TA-C----A-G-G-G-G-G---AT-AA-C--AC------------------T-T-A-…
>ICSZ4EG01AJM4U
G-A-T--G-A-A-C-G-C--T-A-G-C--G-G--G-A-G-G---C---C-T--AA-C--AC-A-T-G-C--A-A-G--C-C--GA-G-CG-G---------T-A----T-T--G---------------------------------T-T-T-C--------------------TTC-G---------------------------G--A--A-A---------------------------T-G----A--GA--G-------AG-C-G-G-C-GT-A--C--G-GG--T--G-C-G-G-A-AC-A-C-G-T-G-TG---CAA-C-CT-G--C-C-TTT--AT-C----T-G-G-G-G-G---AT-GG-T--CT------------------T-T-C-…
>ICSZ4EG01AI4V5
A-A-C--G-A-A-C-G-C--T-G-G-C--G-G--C-A-T-G---C---C-C--AA-C--AC-A-T-G-C--A-A-G--T-C--GA-A-CG-A---------G-A-----------------------------------------------C-C--------------------TTC-G---------------------------G--G------------------------------------------TC--T-------AG-T-G-A-C-GC-A--C--G-GG--T--G-C-G-T-A-AC-G-C-G-T-G-GG---A-A-T-CT-G--C-C-CTT--GG-G----T-T-C-G-G-A---AT-AA-C--TC------------------G-C-C-…
>ICSZ4EG01AEH8Q
A-T-T--G-A-A-C-G-C--T-G-G-C--G-G--C-A-T-G---C---C-T--TA-C--AC-A-T-G-C--A-A-G--T-C--GA-A-CG-----------G-TA-----A--C---------------------------------G-G-G----------------------TCC-T---------------------------T--CGGA-T-------------------------G-C-C----G--AC--G-------AG-T-G-G-C-GA-A--C--G-GG--T--G-A-G-T-A-AT-A-T-A-T-C-GG---A-A-C-GT-G--C-C-CAG--TA-G----T-G-G-G-G-G--AGT-AA-C--TG------------------C-T-C-…
>ICSZ4EG01A9QTF
A-A-C--G-A-A-C-G-C--T-G-G-C--G-G--C-A-T-G---C---C-T--AA-C--AC-A-T-G-C--A-A-G--T-C--GA-A-CG-----------G-TAA--C-A--G-----------------------------------G-T-C--------------------TTC-G---------------------------G--A--T---------------------------G-C-T----G--AC--G-------AG-T-G-G-C-GA-A--C--G-GG--T--G-A-G-T-A-AT-A-C-A-T-T-GG---A-A-C-GT-G--C-C-CGA--TC-G----T-G-G-G-G-G---AT-AA-C--GA------------------G-G-C-…
>ICSZ4EG01A7XNA
A-T-T--G-A-A-C-G-C--T-G-G-C--G-G--C-A-T-G---C---C-T--TA-C--AC-A-T-G-C--A-A-G--T-C--GA-A-CG-----------G-TA-----A--C---------------------------------G-G-G----------------------TCC-T---------------------------T--C--G-G-------------------------G-A-T----GCCGAC-G-------AG-T-G-G-C-GA-A--C--G-GG--T--G-A-G-T-A-AT-A-T-A-T-C-GG---A-A-C-GT-G--C-C-CAG--TA-G----T-G-G-G-G-G---AT-AA-C--TG------------------C-T-C-…
>ICSZ4EG01EWCHI
G-A-T--G-A-A-C-G-C--T-G-G-C--G-G--C-G-T-G---C---T-T--AA-C--AC-A-T-G-C--A-A-G--T-C--GA-A-C--G---------A-G----A-A--C---------CATCGG-A-----------TC-G-A-G-G-A--------------------TTC-G---------------------------T--C--C-A-A-G--TGA--A-GG------------T-GG---G--GA--A-------AG-T-G-G-C-GG-A--C--G-GG--T--G-A-G-T-A-AC-G-C-G-T-G-AG---CAA-T-CT-G--C-C-TTG--GA-G----T-G-G-G-G-A---AT-AA-C--GG------------------C-T-G-…
>ICSZ4EG01C6A2Y
A-A-C--G-A-A-C-G-C--T-G-G-C--G-G--C-A-T-G---C---C-T--AA-C--AC-A-T-G-C--A-A-G--T-C--GA-A-CG-A---------G-A-----------------------------------------------C-C--------------------TTC-----------------------------G--G--G---------------------------------------TC--T-------AG-T-G-G-C-GC-A--C--G-GG--T--G-C-G-T-A-AC-G-C-G-T-G-GG---A-A-T-CT-G--C-C-CTT--TG-G----T-T-C-G-G-A---AT-AA-C--AG------------------C-T-G-…
>ICSZ4EG01CV6T1
G-A-C--G-A-A-C-G-C--T-G-G-C--G-G--C-G-T-G---C---T-T--AA-C--AC-A-T-G-C--A-A-G--T-C--GA-A-CG-G---------A-G----C-A--C----------CCCTG-A-----------AG-G-A-G-T-T--------------------TTC-G---------------------------G--A--C-A-A-C--GGA--TGGG----------A-A-T----G--CT--T-------AG-T-G-G-C-GG-A--C--T-GG--T--G-A-G-T-A-AC-G-C-G-T-G-AG---GAA-C-CT-G--C-C-TTC--CA-G----A-G-G-G-G-G---AC-AA-C--AG------------------T-T-G-…
>ICSZ4EG01CTSOM
A-A-C--G-A-A-C-G-C--T-G-G-C--G-G--C-A-T-G---C---C-T--AA-C--AC-A-T-G-C--A-A-G--T-C--GA-A-CG-A---------G-G---------------------------------------------C-C-C--------------------TTC-G---------------------------G--G--G---------------------------------------TT--T-------AG-T-G-G-C-GC-A--C--G-GG--T--G-C-G-T-A-AC-G-C-G-T-G-GG---A-A-T-CT-G--C-C-CTT--TG-G----T-T-C-G-G-A---AT-AA-C--AG------------------C-T-G-…
>ICSZ4EG01DR1IH
G-A-T--G-A-A-C-G-C--T-G-G-C--G-G--C-A-T-G---C---C-T--AA-T--AC-A-T-G-C--A-A-G--T-C--GA-A-CG-A---------G-A----G-AC-C------------------------------------------------------------TTCGG---------------------------------------------------------------G-T----C--TC--T-------AG-T-G-G-C-GA-A--C--G-GG--T--G-A-G-T-A-AC-A-C-G-T-A-GG---GAA-C-CT-G--C-C-CGC--GC-A----C-C-G-G-G-A---AT-AC-G--CT------------------C-T-G-…
>ICSZ4EG01DORDY
G-A-C--G-A-A-C-G-C--T-G-G-C--G-G--C-G-T-G---C---T-T--AA-C--AC-A-T-G-C--A-A-G--T-C--GA-A-CG-C---------T-G----A-A--G----------------------------CT-T-G-G-T-G--------------------CTT-G---------------------------C--A--C-T-G-G--G--------------------T-G----G--AT--G-------AG-T-G-G-C-GA-A--C--G-GG--T--G-A-G-T-A-AT-A-C-G-T-G-AG---TAA-C-CT-G--C-C-CTT--GA-C----T-C-T-G-G-G---AT-AA-G--CC------------------T-G-G-…
>ICSZ4EG01C5W5W
G-A-C--G-A-A-C-G-C--T-G-G-C--G-G--C-G-T-G---C---T-T--AA-C--AC-A-T-G-C--A-A-G--T-C--GA-A-CG-----------G-AA---A-G--G-----------------------------C-C---T-C-T--------------------TTC-G---------------------------G--G--G---G-G-----------------------T-A----C--TC--G-------AG-T-G-G-C-GA-A--C--G-GG--T--G-A-G-T-A-AC-A-C-G-T-G-AG---TAA-C-CT-G--C-C-CTT--GA-C----T-T-T-G-G-G---AT-AA-C--TT------------------C-A-G-…
>ICSZ4EG01CQL3R
A-A-C--G-A-A-C-G-C--T-G-G-C--G-G--C-A-T-G---C---C-T--AA-C--AC-A-T-G-C--A-A-G--T-C--GA-A-CG-A---------G-A-----------------------------------------------C-C--------------------TTC-G---------------------------G--G------------------------------------------TC--T-------AG-T-G-G-C-GC-A--C--G-GG--T--G-C-G-T-A-AC-G-C-G-T-G-GG---A-A-T-CT-G--C-C-CTT--GG-G----T-T-C-G-G-A---AT-AA-C--TC------------------G-C-C-…
>ICSZ4EG01EUX8U
A-A-C--G-A-A-C-G-C--T-G-G-C--G-G--C-A-T-G---C---C-T--AA-C--AC-A-T-G-C--A-A-G--T-C--GA-A-CG-A---------G-A-----------------------------------------------C-C--------------------TTC-----------------------------G--G--G---------------------------------------TC--T-------AG-T-G-G-C-GC-A--C--G-GG--T--G-C-G-T-A-AC-G-C-G-T-G-GG---A-A-T-CT-G--C-C-CTT--GG-G----T-T-C-G-G-A---AT-AA-CT-CG------------------C---C-…
>ICSZ4EG01CVKFG
A-T-T--G-A-A-C-G-C--T-G-G-C--G-G--C-A-T-G---C---T-T--TA-C--AC-A-T-G-C--A-A-G--T-C--GA-A-CG-----------G-TAA--C-AG-G-----------------------------------G-TGC--------------------TT--G---------------------------C--AC-C---------------------------G-C-T----G--AC--G-------AG-T-G-G-C-GA-A--C--G-GG--T--G-A-G-T-A-AT-G-C-A-T-C-GG---A-A-C-GT-A--C-C-CAG--TC-G----T-G-G-G-G-G---AT-AA-C--GT------------------A-G-C-…
>ICSZ4EG01BN1WP
A-A-C--G-A-A-C-G-C--T-G-G-T--G-G--C-A-T-G---C---C-T--AA-C--AC-A-T-G-C--A-A-G--T-C--GA-A-CG-A---------G-G---------------------------------------------C-C-C--------------------TTC-G---------------------------G--G--G---------------------------------------TT--T-------AG-T-G-G-C-GC-A--T--G-GG--T--G-C-G-T-A-AC-G-C-A-T-G-GG---A-A-T-CT-G--C-C-CTT--TG-G----T-T-C-G-G-A---AT-AA-C--AG------------------C-T-G-…
>ICSZ4EG01B7XZJ
G-A-C--G-A-A-C-G-C--T-G-G-C--G-G--C-G-T-G---C---T-T--AA-C--AC-A-T-G-C--A-A-G--T-C--GA-A-CG-A---------G-A-----------------------------------------------C-C--------------------TTC-G---------------------------G--G------------------------------------------TC--T-------AG-T-G-G-C-GC-A--C--G-GG--T--G-C-G-T-A-AC-G-C-G-T-G-GG---A-A-T-CT-G--C-C-CTT--GG-G----T-T-C-G-G-A---AT-AA-C--TC------------------G-C-C-…
>ICSZ4EG01AUE01
A-T-T--G-A-A-C-G-C--T-G-G-C--G-G--C-A-T-G---C---C-T--TA-C--AC-A-T-G-C--A-A-G--T-C--GA-A-CG-----------G-TAA--C-G--G---------------------------------G-T-C-C--------------------TTC-G---------------------------G--G--A-T-------------------------G-C-C----G--AC--G-------AG-T-G-G-C-GA-A--C--G-GG--T--G-A-G-T-A-AT-G-T-A-T-C-GG---A-A-C-GT-A--C-C-TTT--CA-G----T-G-G-G-G-G---AT-AA-C--GT------------------A-G-C-…
>ICSZ4EG01EU9G2
A-T-T--G-A-A-C-G-C--T-G-G-C--G-G--C-A-T-G---C---C-T--TA-C--AC-A-T-G-C--A-A-G--T-C--AA-A-CG-----------G-TA-----A--C---------------------------------G-G-G----------------------TCC-T---------------------------T--C--G-G-------------------------G-A-T----GCCGAC-G-------AG-T-G-G-C-GA-A--C--G-GG--T--G-A-G-T-A-AT-A-T-A-T-C-GG---A-A-C-GT-G--C-C-CAG--TA-G----T-G-G-G-G-G---AT-AA-C--TG------------------C-T-C-…
>ICSZ4EG01ENMK4
A-A-C--G-A-A-C-G-C--T-G-G-C--G-G--C-A-T-G---C---C-T--AA-C--AC-A-T-G-C--A-A-G--T-C--GA-A-CG-AG--------G-C-----------------------------------------------C-C--------------------TTC-G---------------------------G--G------------------------------------------TT--T-------AG-T-G-G-C-GC-A--C--G-GG--T--G-C-G-T-A-AC-G-C-G-T-G-GG---A-A-T-CT-G--C-C-CTT--GG-G----T-T-C-G-G-A---AT-AA-C--TC------------------G-C-C-…
>ICSZ4EG01ELOMW
A-T-T--G-A-A-C-G-C--T-G-G-C--G-G--C-A-T-G---C---C-T--TA-C--AC-A-T-G-C--A-A-G--T-C--GA-A-CG-----------G-TAA--C-A--G-----------------------------------G-T-C--------------------TTC-G---------------------------G--A--T---------------------------G-C-T----G--AC--G-------AG-T-G-G-C-GA-A--C--G-GG--T--G-A-G-T-A-AT-A-C-A-T-C-GG---A-A-C-GT-G--C-C-CGA--TT-G----T-G-G-G-G-G---AT-AA-C--AA------------------A-G-C-…
>ICSZ4EG01EJ4WT
G-A-C--G-A-A-C-G-C--T-G-G-C--G-G--C-G-T-G---C---T-T--AA-C--AC-A-T-G-C--A-G-G--T-C--GA-A-CG-A---------T-G----A-A--G-----------------------------C-T-G-G-A-G--------------------CTT-G---------------------------C--T--C-C-G-G-----------------------T-G----G--AT--T-------AG-T-G-G-C-GA-A--C--G-GG--T--G-A-G-T-A-AC-A-C-G-T-G-AG---CAA-T-CT-G--C-C-CTT--GA-C----T-C-T-G-G-G---AT-AA-C--TG------------------C-G-G-…
>ICSZ4EG01EHAEM
A-A-C--G-A-A-C-G-C--T-G-G-C--G-G--C-A-T-G---C---T-T--AA-C--AC-A-T-G-C--A-A-G--T-C--GA-A-CG-----------G-CAG--C-A--C-----------------------------A-GTC-T-GTAG-------------------CAATA---------------------------C--A--G-A-T-G---------------------G-G-T----G--GC--G-------AG-T-G-G-C-GG-A--C--G-GG--T--G-A-G-T-A-AT-A-C-G-T-A-GG---A-A-T-CT-G--C-C-TTC--AG-G----T-G-G-G-G-G---AT-AA-C--CC------------------G-G-G-…
>ICSZ4EG01EAMTD
A-A-C--G-A-A-C-G-C--T-G-G-C--G-G--C-A-T-G---C---C-T--AA-C--AC-A-T-G-C--A-A-G--T-C--GA-A-CG-A---------G-A-----------------------------------------------C-C--------------------TTC-G---------------------------G--A------------------------------------------TC--T-------AG-T-G-G-C-GC-A--C--G-GG--T--G-C-G-T-A-AC-G-C-G-T-G-GG---A-A-T-CT-G--C-C-CTT--TG-G----T-T-C-G-G-A---AT-AA-C--AG------------------T-T-G-…
>ICSZ4EG01DX96K
A-A-C--G-A-A-C-G-C--T-G-G-C--G-G--C-A-T-G---C---C-T--AA-C--AC-A-T-G-C--G-A-G--T-C--GA-A-CG-A---------G-A-----------------------------------------------C-C--------------------TTC-G---------------------------G--G--G---------------------------------------TT--T-------AG-T-G-G-C-GC-A--C--G-GG--T--G-C-G-T-A-AC-G-C-G-T-G-GG---A-A-T-CT-G--C-C-CTT--TG-G----T-T-C-G-G-A---AT-AA-C--AG------------------C-T-G-…
>ICSZ4EG01DTI0G
A-A-C--G-A-A-C-G-C--T-G-G-T--G-G--C-A-T-G---C---C-T--AA-C--AC-A-T-G-C--A-A-G--T-C--GA-A-CG-AG--------G-C-----------------------------------------------C-C--------------------TTC-G---------------------------G--G------------------------------------------TT--T-------AG-T-G-G-C-GC-A--C--G-GG--T--G-C-G-T-A-AC-G-C-G-T-G-GG---A-A-T-CT-G--C-C-CTT--TG-G----T-T-C-G-G-A---AT-AA-C--TC------------------G-C-C-…
>ICSZ4EG01DSJA6
A-A-C--G-A-A-C-G-C--T-G-G-C--G-G--C-A-G-G---C---T-T--AA-C--AC-A-T-G-C--A-A-G--T-C--GA-G-GG-----------G-CAG--C-G--G----------------G-----------GG-A-G-T-A----------------------GCA-A------------------------------T--A-C-T-C--CC-----------------G-C-C----G--GC--G-------AC-C-G-G-C-GC-A--C--G-GG--T--G-A-G-T-A-AC-A-C-G-T-A-TG---AAA-C-CT-G--C-C-CGT--AG-C----A-G-G-G-G-G---AT-AA-G--CG------------------G-A-A-…
>ICSZ4EG01DOP3T
A-A-C--G-A-A-C-G-C--T-G-G-C--G-G--C-A-T-G---C---C-C--AA-C--AC-A-T-G-C--A-A-G--T-C--GA-A-CG-A---------G-A-----------------------------------------------C-C--------------------TTC-A---------------------------G--G------------------------------------------TC--T-------AG-T-G-G-C-GC-A--C--G-GG--T--G-C-G-T-A-AC-G-C-G-T-G-GG---A-A-T-CT-G--C-C-CTT--GG-G----T-T-C-G-G-A---AT-AA-C--TC------------------G-C-C-…
>ICSZ4EG01DHM3M
A-A-C--G-A-A-C-G-C--T-G-G-C--G-G--C-A-T-G---C---C-T--AA-C--AC-A-T-G-C--A-A-G--T-C--GA-G-CG-G---------G-C---------------------------------------------A-T-A--------------------GCA-A---------------------------T--A--T---------------------------------------GT--C-------AG-C-G-G-C-AG-A--C--G-GG--T--G-A-G-T-A-AC-G-C-G-T-G-GG---A-A-C-GT-A--C-C-TTT--TG-G----T-T-C-G-G-A---AC-AA-C--TG------------------A-G-G-…
>ICSZ4EG01DEOBL
A-T-T--G-A-A-C-G-C--T-G-G-C--G-G--C-A-T-G---C---C-T--TA-C--AC-A-T-G-C--A-A-G--T-C--GA-A-CG-----------G-TAA--C-G--G-----------------------------------G-TCC--------------------TTC-G---------------------------G--A--T---------------------------G-C-T----G--AC--G-------AG-T-G-G-C-GA-A--C--G-GG--T--G-A-G-T-A-AT-A-C-A-T-C-GG---A-A-C-GT-G--C-C-CGA--TC-G----T-G-G-G-G-G---AT-AA-C--GA------------------A-G-C-…
>ICSZ4EG01DB7YR
A-T-T--G-A-A-C-G-C--T-G-G-C--G-G--C-A-T-G---C---T-T--AA-C--AC-A-T-G-C--A-A-G--T-C--GA-A-CG-----------G-CAG--C-A--C-----------------------------A-GTC-T-GTAG-------------------CAATA---------------------------C--A--G-A-T-G---------------------G-G-T----G--GC--G-------AG-T-G-G-C-GG-A--C--G-GG--T--G-A-G-T-A-AT-A-C-G-T-A-GG---A-A-T-CT-G--C-C-TTC--AG-G----T-G-G-G-G-G---AT-AA-C--CC------------------G-G-G-…
>ICSZ4EG02GPS01
A-T-T--G-A-A-C-G-C--T-G-G-C--G-G--C-A-T-G---C---C-T--TA-C--AC-A-T-G-C--A-A-G--T-C--GA-A-CG-----------G-TAA--CGG--G-------------------------------------TCC--------------------TTCGG---------------------------G--A--T---------------------------G-C-C----G--AC--G-------AG-T-G-G-C-GA-A--C--G-GG--T--G-A-G-T-A-AT-A-T-A-T-C-GG---A-A-C-GT-G--C-C-CAG--TA-G----T-G-G-G-G-G---AT-AA-C--GA------------------G-G-C-…
>ICSZ4EG01D59QR
A-A-C--G-A-A-C-G-C--T-G-G-C--G-G--C-A-T-G---C---C-T--AA-C--AC-A-T-G-C--A-G-G--T-C--GA-A-CG-A---------G-A-----------------------------------------------C-C--------------------TTC-G---------------------------G--G------------------------------------------TC--T-------AG-T-G-G-C-GC-A--C--G-AG--T--G-C-G-T-A-AC-G-C-G-T-G-GG---A-A-T-CT-G--C-C-CTT--GG-G----T-T-C-G-G-A---AT-AA-C--TC------------------G-C-C-…
>ICSZ4EG01D50ME
A-G-C--G-A-A-C-G-C--T-G-G-C--G-G--C-A-G-G---C---T-T--AA-C--AT-A-T-G-C--A-A-G--T-C--GA-G-CG-----------G-T-----------------------------------------------C-C--------------------TTC-G---------------------------G---------------------------------------------GA--T-------AG-T-G-G-C-GG-A--C--G-GG--T--G-A-G-T-A-AC-A-C-G-T-G-GG---A-A-C-GT-A--C-C-CTT--AG-G----T-T-C-G-G-A---AC-AA-C--AC------------------A-G-G-…
>ICSZ4EG01D4I0Q
T---T--G-A-A-C-G-C--T-G-G-C--G-G--C-A-T-G---C---C-T--TA-C--AC-A-T-G-C--A-A-G--T-C--GA-A-CG-----------G-TAA--C-A--G-----------------------------------G-T-C--------------------TTC-G---------------------------G--A--T---------------------------G-C-T----G--AC--G-------AG-T-G-G-C-GA-A--C--G-GG--T--G-A-G-T-A-AT-A-C-A-T-C-GG---A-A-C-GT-G--C-C-CGA--TC-G----T-G-G-G-G-G---AT-AA-C--GA------------------G-G-C-…
>ICSZ4EG01D283N
A-A-C--G-A-A-C-G-C--T-G-G-C--G-G--C-A-T-G---C---C-T--AG-C--AC-A-T-G-C--A-A-G--T-C--GA-A-CG-A---------G-A-----------------------------------------------C-C--------------------TTC-G---------------------------G--G------------------------------------------TC--T-------AG-T-G-G-C-GC-A--C--G-GG--T--G-C-G-T-A-AC-G-C-G-T-G-GG---A-A-T-CT-G--C-C-CTT--GG-G----T-C-C-G-G-A---AT-AA-C--TC------------------G-C-CG…
>ICSZ4EG01D1RV4
A-G-C--G-A-A-C-G-C--T-G-G-C--G-G--C-A-G-G---C---T-T--AA-C--AC-A-T-G-C--A-A-G--T-C--GA-G-CA-G---------G-C-----------------------------------------------C-C--------------------TTC-G---------------------------G--G------------------------------------------GT--C-------AG-C-G-G-C-GG-A--C--G-GG--T--G-A-G-T-A-AC-G-C-G-T-G-GG---A-A-C-GT-G--C-C-TTC--TG-G----T-T-C-G-G-A---AT-AA-T--CC------------------T-G-G-…
>ICSZ4EG01CQS95
A-G-C--G-A-A-C-G-C--T-G-G-C--G-G--C-A-G-G---C---T-T--AA-C--AT-A-T-G-C--A-A-G--T-C--GA-G-CG-----------G-T-----------------------------------------------C-C--------------------TTC-G---------------------------G---------------------------------------------GA--T-------AG-T-G-G-C-GG-A--C--G-GG--T--G-A-G-T-A-AC-A-C-G-T-G-GG---A-A-C-GT-A--C-C-CTT--AG-G----T-T-C-G-G-A---AC-AA-C--AC------------------A-G-G-…
>ICSZ4EG01CNXHL
A-G-C--G-A-A-C-G-C--T-G-G-C--G-G--C-A-G-G---C---T-T--AA-C--AC-A-T-G-C--A-A-G--T-C--GA-A-CG-----------G-T-----------------------------------------------C-C--------------------TTC-G---------------------------G---------------------------------------------GA--T-------AG-T-G-G-C-GG-A--C--G-GG--T--G-A-G-T-A-AC-A-C-G-T-G-GG---A-A-C-GT-AC-C-C-CTT--AG-G----T-T-C-G-G-A---AC-AA-C--AC------------------A-G-G-…
>ICSZ4EG01CICDX
A-T-T--G-A-A-C-G-C--T-G-G-C--G-G--C-A-T-G---C---C-T--TA-C--AC-A-T-G-C--A-A-G--T-C--GA-A-CG-----------G-TAA--C-A--G-----------------------------------G-T-C--------------------TTC-G---------------------------G--A--T---------------------------G-C-T----G--AC--G-------AG-T-G-G-C-GA-A--C--G-GG--T--G-A-G-T-A-AT-A-C-A-T-C-GG---A-A-C-GT-G--C-C-CGA--TC-G----T-G-G-G-G-G---AT-AA-C--GA------------------A-G-C-…
>ICSZ4EG01CFGYU
A-A-C--G-A-A-C-G-C--T-G-G-C--G-G--C-A-T-G---C---C-C--AA-C--AC-A-C-G-C--A-A-G--T-C--GA-A-CG-A---------G-A-----------------------------------------------C-C--------------------TTC-G---------------------------G--G------------------------------------------TC--T-------AG-T-G-G-C-GC-A--C--G-GG--T--G-C-G-T-A-AC-G-C-G-T-G-GG---A-A-T-CT-G--C-C-CTT--GG-G----C-T-C-G-G-A---AT-AA-C--TC------------------G-C-C-…
>ICSZ4EG01CBNFO
A-T-T--G-A-A-C-G-C--T-G-G-C--G-G--A-A-T-G---C---T-T--TA-C--AC-A-T-G-C--A-A-G--T-C--GA-G-CG-----------G-CAG--C-G--C---------------------------------G-G-G----------------------GCA-A------------------------------C--C-T-------------------------G-G-C----G--GC--G-------AG-C-G-G-C-GA-A--C--G-GG--T--G-A-G-T-A-AT-A-C-A-T-C-GG---A-A-C-GT-G--C-C-CAG--AC-G----T-G-G-G-G-G---AT-AA-C--TA------------------C-T-C-…
>ICSZ4EG01CAWRW
A-A-C--G-A-A-C-G-C--T-G-G-C--G-G--C-A-C-G---C---C-T--AA-C--AC-A-T-G-C--A-A-G--T-C--GA-G-CG-A---------G-A-----------------------------------------------C-C--------------------TTC-G---------------------------G--G------------------------------------------TC--T-------AG-T-G-G-C-GC-A--C--G-GG--T--G-C-G-T-A-AC-G-C-G-T-G-GG---A-A-T-CT-G--C-C-CTT--GG-G----T-T-C-G-G-A---AT-AA-C--TC------------------G-C-C-…
>ICSZ4EG01CAAJ6
A-T-T--G-A-A-C-G-C--T-G-G-C--G-G--C-A-T-G---C---C-T--TA-C--AC-A-T-G-C--A-A-G--T-C-GAA-ACGG-----------G-TAG-------C---------------------------------G-G-G-G--------------------TCC-T---------------------------T--C--G-G-------------------------G-A-T----GCCGAC-G-------AG-TGG-G-C-GA-A--C--G-GG--T--G-A-G-T-A-AT-A-T-A-T-C-GG---A-A-C-GT-G--C-C-CAGG-TA-G----T-G-G-G-G-G---AT-AA-C--TG------------------C-T-C-…
>ICSZ4EG01C9RVL
A-A-C--G-A-A-C-G-C--T-G-G-C--G-G--C-A-T-G---C---C-T--AA-C--AT-A-T-G-C--A-A-G--T-C--GA-A-CG-A---------G-A-----------------------------------------------C-C--------------------TTC-G---------------------------G--G------------------------------------------TC--T-------AG-T-G-G-C-GC-A--C--G-GG--T--G-C-G-T-A-AC-G-C-G-T-G-GG---A-A-T-CT-G--C-C-CTT--GG-G----T-T-C-G-G-A---AT-AG-C--TC------------------G-C-C-…
>ICSZ4EG01C9KA0
A-T-T--G-A-A-C-G-C--T-G-G-C--G-G--C-A-T-G---C---C-T--TA-C--AC-A-T-G-C--A-A-G--T-C--GA-A-CG-----------G-TA-----A--C---------------------------------G-G-G----------------------TCC-T---------------------------T--C--G-G-------------------------G-A-T----GCCGAC-G-------AG-T-G-G-C-GA-A--C--G-GG--T--G-A-G-T-A-AT-A-T-A-T-C-GG---A-A-C-GT-G--C-C-CAG--TA-G----T-G-G-G-G-G--AGT-AA-C--TG------------------C-T-C-…
>ICSZ4EG01C72Q2
A-A-C--G-A-A-C-G-C--T-G-G-C--G-G--C-G-T-G---C---T-T--AA-C--AC-A-T-G-C--A-A-G--T-C--GA-A-CG-G---------G-G----G-T--G-------CCATGTGTGAA----------GT-G-A-T-AGC--------------------TTGCT---------------------------A--TCATGG-A-A--CT---TTTGG-----------G-A----T--CC--T-------AG-T-G-G-C-GG-A--C--G-GG--T--G-A-G-T-A-AC-G-C-G-T-G-GG---CAA-C-CT-G--C-C-CCA--TA-C----C-G-G-G-G-G---AT-AA-C--AC------------------T-T-A-…
>ICSZ4EG01C34Q4
A-A-C--G-A-A-C-G-C--T-G-G-T--G-G--C-A-T-G---C---C-T--AA-C--AC-G-T-G-C--A-A-G--T-C--GA-A-CG-A---------G-A-----------------------------------------------C-C--------------------TTC-G---------------------------G--G------------------------------------------TC--T-------AG-T-G-G-C-GC-A--C--G-GG--T--G-C-G-T-A-AC-G-C-G-T-G-GG---A-A-T-CT-G--C-C-CTT--GG-G----T-T-C-G-G-A---AT-AA-C--TC------------------A-C-C-…
>ICSZ4EG01C1P6Z
A-A-C--G-A-A-C-G-C--T-G-G-C--G-G--C-A-T-G---C---C----AA-C--AC-A-T-G-C--A-A-G--T-C--GA-G-CG-A---------G-A-----------------------------------------------C-C--------------------TTC-G---------------------------G--G------------------------------------------TC--T-------AG-T-G-G-C-GC-A--T--G-GG--T--G-C-G-T-A-AC-G-C-G-T-G-GG---A-A-T-CT-G--C-C-CTT--GG-G----T-T-C-G-G-A---AT-AA-C--TC------------------G-C-C-…
>ICSZ4EG01BUNUJ
A-T-T--G-A-A-C-G-C--T-G-G-C--G-G--C-A-T-G---C---T-T--AA-C--AC-A-T-G-C--A-A-G--T-C--GA-A-CG-A---------G-A-----------------------------------------------C-C--------------------TTC-G---------------------------G--G------------------------------------------TC--T-------AG-T-G-G-C-GC-A--C--G-GG--T--G-C-G-T-A-AC-G-C-G-T-G-GG---A-A-T-CT-G--C-C-CTT--GG-G----T-T-C-G-G-A---AT-AA-C--TC------------------G-C-C-…
>ICSZ4EG01BULCQ
A-A-C--G-A-A-C-G-C--T-G-G-C--G-G--C-A-T-G---C---C-T--AA-C--AC-A-T-G-C--A-A-G--T-C--GA-A-CG-A-----------G-----------------------------------------------A-TC-------------------TTC-G---------------------------A--A------------------------------------------TC--T-------AG-T-G-G-C-GC-A--C--G-GG--T--G-C-G-T-A-AC-G-C-G-T-G-GG---A-A-T-CT-G--C-C-CTT--TG-G----T-T-C-G-G-A---AT-AA-C--AG------------------T-T-G-…
>ICSZ4EG01BTCFD
A-T-T--G-A-A-C-G-C--T-G-G-C--G-G--C-A-T-G---C---C-T--TA-C--AC-A-T-G-C--A-A-G--T-C--GA-A-CG-----------G-TAA--C-A--G-----------------------------------G-T-C--------------------TTC-G---------------------------G--A--T---------------------------G-C-T----G--AC--G-------AG-T-G-G-C-GA-A--C--G-GG--T--G-A-G-T-A-AT-A-C-A-T-C-GG---A-A-C-GT-G--C-C-CGA--TC-G----T-G-G-G-G-G---AT-AA-C--GA------------------A-G-C-…
>ICSZ4EG01BRPB2
A-T-T--G-A-A-C-G-C--T-G-G-C--G-G--C-A-T-G---C---C-T--TA-C--AC-A-T-A-C--A-A-G--T-C--GA-A-CG-----------G-TA-----A--C---------------------------------G-G-G----------------------TCC-T---------------------------T--C--G-G-------------------------G-A-T----GCCGAC-G-------AG-T-G-G-C-GA-A--C--G-GG--T--G-A-G-T-A-AT-A-T-A-T-C-GG---A-A-C-GT-G--C-C-CAG--TA-GT---T-G-G-G-G-G---AT-AA-C--TG------------------C-T-C-…
>ICSZ4EG01BQ131
A-A-C--G-A-A-C-G-C--T-G-G-C--G-G--C-A-T-G---C---C-T--AA-C--AC-A-T-G-C--A-A-G--T-C--GA-A-CG-A---------G-A-----------------------------------------------C-C--------------------TTC-G---------------------------G--G------------------------------------------TC--T-------AG-T-G-G-C-GC-A--C--G-GG--T--G-C-G-T-A-AC-G-C-G-T-G-GG---A-A-T-CT-G--C-C-CTT--GG-G----T-T-C-G-G-A---AT-AA-C--TC------------------G-C-C-…
>ICSZ4EG01BN9QF
A-A-C--G-A-A-C-G-C--T-G-G-C--G-G--C-A-G-G---C---T-T--AA-C--AC-G-T-G-C--A-A-G--T-C--GA-G-CG-C---------C-C-------------------------------------------------C--------------------GCA-A---------------------------G---------------------------------------------GG--G-------AG-C-G-G-C-AG-A--C--G-GG--T--G-A-G-T-A-AC-G-C-G-T-G-GG---A-A-T-CT-A--C-C-CAT--CT-C----T-A-C-G-G-A---AT-AA-C--GC------------------A-T-G-…
>ICSZ4EG01BMXHN
A-A-C--G-A-A-C-G-C--T-G-G-C--G-G--C-A-T-G---C---C-T--AA-C--AC-A-T-G-C--A-A-G--T-T--GA-G-CG-A---------G-A-----------------------------------------------C-C--------------------TTC-A---------------------------G--G------------------------------------------TC--T-------AG-T-G-G-C-GC-A--C--G-GG--T--G-C-G-T-A-AC-G-C-G-T-G-GG---A-A-T-CT-G--C-C-CTT--GG-G----T-T-C-G-G-A---AT-AA-C--TC------------------G-C-C-…
>ICSZ4EG01BLKFA
A-A-C--G-A-A-C-G-C--T-G-G-C--G-G--C-A-T-G---C---C-T--AA-C--AC-A-T-G-C--A-A-G--T-C--GA-A-CG-----------G-T-----------------------------------------------C-C--------------------TTC-G---------------------------G---------------------------------------------GA--T-------AG-T-G-G-C-GG-A--C--G-GG--T--G-A-G-T-A-AC-A-C-G-T-G-GG---A-A-C-GT-A--C-C-CTT--AG-G----T-T-C-G-G-A---AC-AA-C--AC------------------A-G-G-…
>ICSZ4EG01BKP9G
A---T--G-A-A-C-G-C--T-A-G-C--G-G--G-A-G-G---C---C-T--AA-C--AC-A-T-G-C--A-A-G--T-C--GA-G-CG-G---------G-C---------------------------------------------A-T-A--------------------GCA-A---------------------------T--A--T---------------------------------------GT--C-------AG-C-G-G-C-AG-A--C--G-GG--T--G-A-G-T-A-AC-G-C-G-T-G-GG---A-A-C-GT-A--C-C-TTT--TG-G----T-T-C-G-G-A---AC-AA-C--TG------------------A-G-G-…
>ICSZ4EG01BGY55
A-A-C--G-A-A-C-G-C--T-G-G-C--G-G--C-A-T-G---C---C-T--AA-C--AC-G-T-G-C--A-A-G--T-T--GA-A-CG-A---------G-A-----------------------------------------------C-C--------------------TTC-G---------------------------G--G------------------------------------------TC--T-------AG-T-G-G-C-GC-A--C--G-GG--T--G-C-G-T-A-AC-G-C-G-T-G-GG---A-A-T-CT-G--C-C-CCT--GG-G----T-T-C-G-G-A---AT-AA-C--TC------------------G-C-C-…
>ICSZ4EG01BEYVX
A-A-C--G-A-A-C-G-C--T-G-G-C--G-G--C-A-T-G---C---T-T--AA-C--AC-A-T-G-C--A-A-G--T-C--GA-A-CG-A---------G-A-----------------------------------------------C-C--------------------TTC-G---------------------------G--G------------------------------------------TC--T-------AG-T-G-G-C-GC-A--C--G-AG--T--G-C-G-T-A-AC-G-C-G-T-G-GG---A-A-T-CT-G--C-C-CTT--GG-G----T-T-C-G-G-A---AC-AA-C--TC------------------G-C-C-…
>ICSZ4EG01B5VRS
A-T-T--G-A-A-C-G-C--T-G-G-C--G-G--C-A-T-G---C---C-T--TA-C--AC-A-T-G-C--A-A-G--T-C--GA-A-CG-----------G-TA-----A--C---------------------------------G-G-G----------------------TCC-T---------------------------T--C--G-G-------------------------G-A-T----GCCGAC-G-------AG-T-G-G-C-GA-A--C--G-GG--T--G-A-G-T-A-AT-A-T-A-T-C-GG---A-A-C-GT-G--C-C-CAG--TA-G----T-G-G-G-G-G---AT-AA-C--TG------------------C-T-C-…
>ICSZ4EG01B1GV4
G-A-C--G-A-A-C-G-C--T-G-G-C--G-G--C-G-T-G---C---T-T--AA-C--AC-A-T-G-C--A-A-G--T-C--GA-A-CG-A---------G-A----A-G--A--------------G-A-----------TG-A-G-A-A-G--------------------CTT-G---------------------------C--T--T-C-T-T--ATC------------------G-A----T--TC--G-------AG-T-G-G-C-AA-A--C--G-GG--T--G-A-G-T-A-AC-G-C-G-T-A-AG---CAA-C-CT-G--C-C-CTC--TA-G----A-T-G-G-G-G---AC-AA-C--AG------------------C-T-G-…
>ICSZ4EG01AWJQF
A-A-C--G-A-A-C-G-C--T-G-G-C--G-G--C-A-T-G---C---C-T--AA-C--AC-A-T-G-C--A-A-G--T-C--GA-A-C--G---------A-G----A-A--C---------CATCGG-A-----------TC-G-A-G-G-A--------------------TTC-G---------------------------T--C--C-A-A-G--TGA--A-GG------------T-GG---G--GA--A-------AG-T-G-G-C-GG-A--C--G-GG--T--G-A-G-T-A-AC-G-C-G-T-G-AG---CAA-T-CT-G--C-C-TTG--GA-G----T-G-G-G-G-A---AT-AA-C--GG------------------C-T-G-…
>ICSZ4EG01AQQLB
A-A-C--G-A-A-C-G-C--T-G-G-C--G-G--C-A-G-G---C---T-T--AA-C--AC-A-T-G-C--A-A-G--T-C--GA-A-CG-----------G-TA-----A--C---------------------------------G-G-G----------------------TCC-T---------------------------T--C--G-G-------------------------G-A-T----GCCGAC-G-------AG-T-G-G-C-GA-A--C--G-GG--T--G-A-G-T-A-AT-A-T-A-T-C-GG---A-A-C-GT-G--C-C-CAG--TA-G----T-G-G-G-G-G---AT-AA-C--TG------------------C-T-C-…
>ICSZ4EG01AO0ID
G-A-C--G-A-A-C-G-C--T-G-G-C--G-G--C-A-T-G---C---C-T--AA-C--AC-A-T-G-C--A-A-G--T-C--GA-A-CG-A---------G-A-----------------------------------------------C-C--------------------TTC-G---------------------------G--G------------------------------------------TC--T-------AG-T-G-G-C-GC-A--C--A-GG--T--G-C-G-T-A-AC-G-C-G-T-G-GG---A-A-T-CT-G--C-C-CTT--GG-G----T-T-C-G-G-A---AT-AA-C--TC------------------G-C-C-…
>ICSZ4EG01AJVMV
A-G-C--G-A-A-C-G-C--T-G-G-C--G-G--C-A-G-G---C---T-T--AA-C--AC-A-T-G-C--A-A-G--T-C--GA-G-CG-G---------G-C---------------------------------------------A-T-A--------------------GCA-A---------------------------T--A--T---------------------------------------GT--C-------AG-C-G-G-C-AG-A--C--G-GG--T--G-A-G-T-A-AC-G-C-G-T-G-GG---A-A-C-GT-A--C-C-TTT--TG-G----T-T-C-G-G-A---AC-AA-C--TG------------------A-G-G-…
>ICSZ4EG01AJ9GZ
A-T-T--G-A-A-C-G-C--T-G-G-C--G-G--C-A-T-G---C---C-T--TA-C--AC-A-T-G-C--A-A-G--T-C--GA-A-CG-----------G-TA-----A--C---------------------------------G-G-G----------------------TCC-T---------------------------T--C--G-G-------------------------GATGTC---G--AC--G-------AG-T-G-G-C-GA-A--C--G-GG--T--G-A-G-T-A-AT-A-T-A-T-C--G---A-A-C-GT-G--C-C-CAG--TA-G----T-G-G-G-G-G--AGT-AA-C--TG------------------C-T-C-…
>ICSZ4EG01AIQVC
G-A-T--G-A-A-C-G-C--T-G-G-C--G-G--C-G-T-G---C---T-T--AA-C--AC-A-T-G-C--A-A-G--T-C--GA-A-C--G---------A-G----A-A--C---------CATCGG-A-----------TC-G-A-G-G-A--------------------TTC-G---------------------------T--C--C-A-A-G--TGA--AGGT------------G-GG---G--C---A-------AG-T-G-G-C-GG-A--C--G-GG--T--G-A-G-T-A-AC-G-C-G-T-G-AG---CAA-T-CT-G--C-C-TTG--GA-G----T-G-G-G-G-A---AT-AA-C--GG------------------C-T-G-…
>ICSZ4EG01A6E63
A---T--G-A-A-C-G-C--T-G-G-C--G-G--C-A-T-G---C---C-T--AA-T--AC-A-T-G-C--A-A-G--T-C--GA-A-CG-----------G-TAA--C-A--G-----------------------------------G-T-C--------------------TTC-G---------------------------G--A--T---------------------------G-C-T----G--AC--G-------AG-T-G-G-C-GA-A--C--G-GG--T--G-A-G-T-A-AT-A-C-A-T-C-GG---A-A-C-GT-G--C-C-CGA--TC-G----T-G-G-G-G-G---AT-AA-C--GA------------------A-G-C-…
>ICSZ4EG01A1TCI
A-A-C--G-A-A-C-G-C--T-G-G-C--G-G--C-A-T-G---C---C-T--TA-C--AC-A-T-G-C--A-A-G--T-C--GA-A-CG-----------G-TA-----A--C---------------------------------G-G-G----------------------TCC-T---------------------------T--C--G-G-------------------------G-A-T----GCCGAC-G-------AG-T-G-G-C-GA-A--C--G-GG--T--G-A-G-T-A-AT-A-T-A-T-C-GG---A-A-C-GT-G--C-C-CAG--TA-G----T-G-G-G-G-G---AT-AA-C--TG------------------C-T-C-…
>ICSZ4EG01CNHCN
G-A-T--A-A-A-C-G-C--T-G-G-C--G-G--C-G-C-A---C---A-T--AA-G--AC-A-T-G-C--A-A-G--T-C--GA-A-CG-G---------A-C------CA-A----------------------------AT-C-C-T-T-A--------------------GTTTA---------------------------C--T--A-T-G-G--A------------------A-G-A----G--GT--T-------AG-T-G-G-C-GG-A--C--T-GG--T--G-A-G-T-A-AC-A-C-G-T-A-AG---CAA-C-CT-G--C-C-TAT--TA-G----A-G-G-G-G-A---AC-AA-C--AG------------------T-T-A-…
>ICSZ4EG01A68AM
A-A-C--G-A-A-C-G-C--T-G-G-C--G-G--C-A-T-G---C---C-T--AA-C--AC-A-T-G-C--A-A-G--T-C--GA-A-CG-A---------G-A-----------------------------------------------C-C--------------------TTC-G---------------------------G--G------------------------------------------TC--T-------AG-T-G-G-C-GC-A--C--G-GG--T--G-C-G-T-A-AC-G-C-G-T-G-GG---A-A-C-CT-G--C-C-TTT--AG-G----T-T-C-G-G-A---AT-AA-C--TC------------------A-G-A-…
>ICSZ4EG01DSFDI
G-A-C--G-A-A-C-G-C--T-G-G-C--G-G--C-G-T-G---C---T-T--AA-C--AC-A-T-G-C--A-A-G--T-C--GA-G-CG-G---------G-G----A-T------ATTGAG-----C-G-----------GA-A-A-T-C-C--------------------TTC-G---------------------------G--G--G-T-G-G--AAGGTTGAT--------------A----T--TC--T-------AG-C-G-G-C-GG-A--C--G-GG--T--G-A-G-T-A-AC-G-C-G-T-G-AG---CAA-T-CT-G--T-C-CCG--TA-C----A-G-G-G-G-G---AT-AA-C--AC------------------T-T-G-…
>ICSZ4EG01ELOYP
G-A-T--G-A-A-C-G-C--T-G-G-C--G-G--C-G-T-G---C---T-T--AA-C--AC-A-T-G-C--A-A-G--T-C--GA-A-CG-G---------A-GC---C-G--C----------TC-TG-A-----------AA-G-A-G-G-A--------------------TTC-G---------------------------T--C--C-A-A-T--GGA---AGG------------GTGT---G--CT--T-------AG-T-G-G-C-GG-A--C--G-GG--T--G-A-G-T-A-AC-G-C-G-T-G-AG---GAA-C-CT-G--C-C-TTG--GA-G----T-G-G-G-G-A---AT-AA-C--AG------------------C-T-G-…
>ICSZ4EG01BPV8P
A-A-C--G-A-A-C-G-C--T-G-G-C--G-G--C-A-T-G---C---C-T--AA-C--AC-A-T-G-C--A-A-G--T-C--GA-A-CG-----------G-AT----------------------------------------------C-C--------------------TTC-G---------------------------G--G------------------------------------------AT--T-------AG-T-G-G-C-GC-A--C--G-GG--T--G-C-G-T-A-AC-G-C-G-T-G-GG---A-A-T-CT-G--C-C-CTT--GG-G----T-G-C-G-G-A---AT-AA-C--TC------------------A-G-A-…
>ICSZ4EG01EPU5U
G-A-T--G-A-A-C-G-C--T-G-G-C--G-G--C-A-T-G---C---C-T--AA-G--AC-A-T-G-C--A-A-G--T-C--GA-A-CG-A---------A-G----C-G--G---CCCA--CTGAA--A----------TCT-G-C-G-T-G--------------------CTT-G---------------------------C--A--C-A-A-A--GAT--GGACGTGG-AT-TA--C-C----G--CT--T-------AG-T-G-G-C-AA-A--C--G-GG--T--G-A-G-T-A-AC-A-C-G-T-G-GG---TAA-C-CT-G----C-CTT--CA-AG---A-T-G-G-G-G---AT-AA-C--AG------------------T-T-G-…
>ICSZ4EG01ENHQW
G-A-C--G-A-A-C-G-C--T-G-G-C--G-G--C-A-C-G---C---C-T--AA-C--AC-A-T-G-C--A-A-G--T-C--G--A--------------A------C------------------GG-------------AG-A-A---C-C--------------------TTC--------------------------------G--G---G-----T---T--C------------T---------C-----------AG-T-G-G-C-GG-A--C--G-GG--T--G-A-G-T-A-AC-A-C-G-T-G-AG---CAA-C-CT-G--C-C-TCT--CA-G----A-G-G-G-G-G---AT-AA-C--GT------------------T-T-G-…
>ICSZ4EG01DN3T7
G-A-T--G-A-A-C-G-C--T-G-G-C--G-G--C-G-T-G---C---T-T--AA-C--AC-A-T-G-C--A-A-G--T-C--GA-A-CG-G-----------G----G-A--T-----------------------------GTAAGCGGAAGT-------------------TTTCGGA-------------------------C--TAAAGC-T-T-----------------------A-T----AT-CC--T-------AG-T-G-G-C-GG-A--C--G-GG--T--G-A-G-T-A-AC-G-C-G-T-G-GG---TAA-C-CT-G--C-C-CTG--CA-C----A-G-G-G-G-G---AT-AA-C--AC------------------C-T-G-…
>ICSZ4EG01CTUVY
A-A-C--G-A-A-C-G-C--T-G-G-C--G-G--C-A-T-G---C---T-T--AA-C--AC-A-T-G-C--A-A-G--T-C--GA-A-CG-A---------G-A------C------------------------------------------C--------------------TTC-----------------------------G---------G--------------------------------G--TC--T-------AG-T-G-G-C-GC-A--C--G-GG--T--G-C-G-T-A-AC-G-C-G-T-G-GG---A-A-T-CT-G--C-C-CTT--AG-G----T-A-C-G-G-A---AT-AA-C--TC------------------A-G-A-…
>ICSZ4EG01AKZZA
G-A-C--G-A-A-C-G-C--T-G-G-C--G-G--C-G-T-G---C---C-T--AA-T--AC-A-T-G-C--A-A-G--T-A--GA-A-CG-C---------T-G----A-A--G-----------------------------G-A-G-G-A-G--------------------CTT-G---------------------------C--T--C-T-T-T--C--------------------C-G----G--AT--G-------AG-T-T-G-C-GA-A--C--G-GG--T--G-A-G-T-A-AC-G-C-G-T-A-GG---TAA-C-CT-G--C-C-TGG--TA-G----C-G-G-G-G-G---AT-AA-C--TA------------------T-T-G-…
>ICSZ4EG01ETFFD
G-A-C--G-A-A-C-G-C--T-G-G-C--G-G--C-A-C-G---C---C-T--AA-C--AC-A-T-G-C--A-A-G--T-C--GA-A-CG-G---------A-GT---T-T--G-----------------------------A-G---G-G-G--------------------CTT-G---------------------------C-----T-C-C-T-----------------------TAA----A--CT--T-------AG-T-G-G-C-GG-A--C--G-GG--T--G-A-G-T-A-AC-A-C-G-T-G-AG---CAA-C-CT-G--C-C-TTT--CG-G----A-G-G-G-G-G---AC-AA-C--AG------------------T-T-G-…
>ICSZ4EG01EGPO2
G-A-C--A-A-A-C-G-C--T-G-G-C--G-G--C-G-T-G---C---T-T--AA-C--AC-A-T-G-C--A-A-G--T-C--GA-A-CG-G---------A------C-T--------------GAA--T-----------TT-G-G-T-G-C--------------------TT------------------------------G-----C-----A--CCG---AAA------------G-A----A-AGT--T-------AG-T-G-G-C-GG-A--C--G-GG--T--G-A-G-T-A-AC-A-C-G-T-G-AG---CAA-C-CT-G--C-C-CTT--CA-G----A-G-G-G-G-G---AC-AA-C--AG------------------T-T-G-…
>ICSZ4EG01DKP34
A-G-C--G-A-A-C-G-C--T-G-G-C--G-G--A-A-T-G---C---T-T--AA-C--AC-A-T-G-C--A-A-G--T-C--GC-A-CG-G---------G-G-----------------------------------------------G-C--------------------TTA-G---------------------------G--C------------------------------------------TT--C-------AG-T-G-G-C-GG-A--C--G-GG--T--G-A-G-T-A-AC-G-C-G-T-A-GG---A-A-C-GT-G--T-C-CTG--GG-A----T-G-G-G-G-G---AT-AA-C--GC------------------T-G-G-…
>ICSZ4EG01C6XVC
A-G-C---GA-A-C-G-C--T-G-G-C--G-G--C-A-G-G---C---T-T--AA-C--AC-A-T-G-C--A-A-G--T-C--GA-G-CG-G---------G-C---------------------------------------------A-C----------------------TTC-G------------------------------G--T---------------------------------------GT--C-------AG-C-G-G-C-AG-A--C--G-GG--T--G-A-G-T-A-AC-A-C-G-T-G-GG---A-A-C-GT-A--C-C-CTT--CG-G----T-T-C-G-G-A---AT-AA-C--GC------------------T-G-G-…
>ICSZ4EG01C712O
A-A-C--G-A-A-C-G-C--T-G-G-C--G-G--C-A-T-G---C---C-T--AA-C--AC-A-T-G-C--A-A-G--T-C--GA-A-CG-A---------G-A-----------------------------------------------C-C--------------------TTC-G---------------------------G--G------------------------------------------TC--T-------AG-T-G-G-C-GC-A--C--G-GG--T--G-C-G-T-A-AC-G-C-G-T-G-GG---A-A-T-CT-A--C-C-CTT--GG-G----T-T-C-G-G-A---AT-AA-C--AG------------------T-T-A-…
>ICSZ4EG01DRBK7
A-T-T--G-A-A-C-G-C--T-G-G-C--G-G--C-A-T-G---C---C-T--TA-C--AC-A-T-G-C--A-A-G--T-C--GA-A-CG-----------G-CAG--C-G--C---------------------------------G-G-G-A--------------------GCA-A---------------------------T--C--C-T-------------------------G-G-C----G--GC--G-------AG-T-G-G-C-GA-A--C--G-GG--T--G-A-G-T-A-AT-A-C-A-T-C-GG---A-A-C-GT-G--C-C-CAA--TC-G----T-G-G-G-G-G---AT-AA-C--GC------------------A-G-C-…
>ICSZ4EG01C7AP0
G-A-T--G-A-A-C-G-C--T-G-G-C--G-G--C-G-T-G---C---T-T--AA-C--AC-A-T-G-C--A-A-G--T-C--GA-A-CG-G---------A-C----T-T--A--------------T-A-----------TG-G-A-A-G-C--------------------CTA-G---------------------------C-----G-A-A-A--TAT--------------------A----A--GC--C-------AG-T-G-G-C-GG-A--C--G-GG--T--G-A-G-T-A-AC-G-C-G-T-G-GG---TAA-C-CT-G--C-C-CTG--TA-C----C-G-G-G-G-G---AC-AA-C--AG------------------C-C-G-…
>ICSZ4EG01B12XC
G-A-C--G-A-A-C-G-C--T-G-G-C--G-G--C-G-T-G---C---T-T--AA-C--AC-A-T-G-C--A-A-G--T-C--GA-G-CG-----------G-AA---A-G--G-----------------------------C-C-----A-C--------------------TTC-G---------------------------G--T------G-G-----------------------T-A----C--TC--G-------AG-C-G-G-C-GA-A--C--G-GG--T--G-A-G-T-A-AC-A-C-G-T-G-AG---TAA-T-CT-G--C-C-CTC--CA-C----T-T-T-G-G-G---AT-AG-C--CA------------------C-C-G-…
>ICSZ4EG01BQ8AT
G-A-T--G-A-A-C-G-C--T-G-G-C--G-G--C-G-T-G---C---A-T--AA-C--AC-A-T-T-C--A-A-G--T-C--GA-A-CG-G---------A-T----A-A--A-------------------------------G-C-G-T-T--------------------TTC-G---------------------------G--A--C-G-T-------------------------T-T----T--AT--C-------AG-T-G-G-C-GG-A--C--G-GG--T--G-A-G-T-A-AC-G-C-G-T-G-AG---CAA-C-CT-A--C-C-TTA--GT-G----A-G-G-G-G-G---AT-AA-C--GT------------------T-T-G-…
>ICSZ4EG01AT7TW
G-A-T--G-A-A-C-G-C--T-G-G-C--G-G--C-G-T-G---C---T-T--AA-C--AC-A-T-G-C--A-A-G--T-C--GA-A-CG-----------G-G----G-A------------TGTAAGCG-----------GA---A-G-T-T--------------------TTC-G---------------------------G--A--C---T-A--AAG--CTTAT-----------A-T-----C-CT----------AG-T-G-G-C-GG-A--C--G-GG--T--G-A-G-T-A-AC-G-C-G-T-G-GG---TAA-C-CT-G--C-C-CTG--CA-C----A-G-G-G-G-G---AT-AA-C--AC------------------C-T-G-…
>ICSZ4EG01EVIHF
G-A-T--A-A-A-C-G-C--T-G-G-C--G-G--C-G-C-A---C---A-T--AA-G--AC-A-T-G-C--A-A-G--T-C--GA-A-CG-A---------A-C----T-TA-A----------------------------CC-C-T-A-A-G--------------------TTT-A---------------------------C--T--T-T-G-G--G------------------A-G-C----G--GT--T-------AG-T-G-G-C-GG-A--C--T-GG--T--G-A-G-T-A-AC-A-C-G-T-A-AG---CAA-C-CT-G--C-C-TAT--CA-G----A-G-G-G-G-G---AC-AA-C--AG------------------T-T-A-…
>ICSZ4EG01CN9V6
G-A-C--G-A-A-C-G-C--T-G-G-C--G-G--C-G-G-G---C---T-T--AA-C--AC-A-T-G-C--A-A-G--T-C--GA-A-CG-A---------G-A----A----T-----------------------------C-C-C-G-A-G--------------------CTT-G---------------------------C-----T-T-G-G-----------------------G-AG---G--A---A-------AG-T-G-G-C-GC-A--C--G-GG--T--G-A-G-T-A-AC-G-C-G-T-A-GG---CAA-T-CT-G--C-C-CCC--AA-C----T-G-A-G-G-A---AT-AA-C--CC------------------A-T-C-…
>ICSZ4EG01DRHIV
G-A-T--A-A-A-C-G-C--T-G-G-C--G-G--C-G-T-G---C---C-T--AA-C--AC-A-T-G-C--A-A-G--T-C--GA-A-CG-G---------A-C----T-TACG---------------------------------T-T-G-A----------------TGGTAACTG---------------------------A--T--G-C---------------------------G-T----A--GGT-T-------AG-T-G-G-C-GG-A--C--G-GG--T--G-A-G-T-A-AC-G-C-G-T-G-AG---CAA-C-CT-G--C-C-TTG--GA-G----T-G-G-G-G-G---AC-AA-C--AG------------------C-T-G-…
>ICSZ4EG01DLDCF
G-A-T--G-A-A-C-G-C--T-G-G-C--G-G--C-G-T-G---C---T-T--AA-C--AC-A-T-G-C--A-A-G--T-C--GA-A-CG-G---------A------C-T--T---------ATAT---G-----------GA-A---G-C-C---------------------T--A---------------------------G--C--G-A------AA-------T-----------A-T----AA-GC--C-------AG-T-G-G-C-GG-A--C--G-GG--T--G-A-G-T-A-AC-G-C-G-T-G-GG---TAA-C-CT-G--C-C-CTG--TA-C----C-G-G-G-G-G---AC-AA-C--AG------------------C-C-G-…
>ICSZ4EG01DI896
A-A-C--G-A-A-C-G-C--T-G-G-C--G-G--C-A-G-G---C---C-T--AA-C--AC-A-T-G-C--A-A-G--T-C--GA-A-CG-CT--------CGT-------------------------------------------------A-------------------GCAATA---------------------------C---------------------------------------------GA--G-------AG-T-G-G-C-AG-A--C--G-GG--T--G-A-G-T-A-AC-G-C-G-T-G-GG---A-A-C-CT-T--C-C-CAG--TG-G----T-A-C-G-G-A---AT-AG-C--TC------------------A-G-G-…
>ICSZ4EG01DN6TF
A-T-T--G-A-A-C-G-C--T-G-G-C--G-G--C-A-T-G---C---C-T--TA-C--AC-A-T-G-C--A-A-G--T-C--GA-A-CG-----------G-T-A--G-A--------------------------------------G-T-A--------------------GCA-A---------------------------T--A--C-------------------------------T----C--GA--G-------AG-T-G-G-C-GA-A--C--G-GG--T--G-A-G-T-A-AT-A-T-A-T-C-GG---A-A-C-GT-G--C-C-CAG--TC-G----T-G-G-G-G-G---AT-AA-C--GT------------------A-G-A-…
>ICSZ4EG01CW375
G-A-C--G-A-A-C-G-C--T-G-G-C--G-G--C-A-C-G---C---C-T--AA-C--AC-A-T-G-C--A-A-G--T-C--GA-A-CG-G---------A-G------T--G---------A------------------AG-A---T-G-C--------------------TT------------------------------G--C--A-T------C------TG--------------A----A--CT--T-------AG-T-G-G-C-GG-A--C--G-GG--T--G-A-G-T-A-AC-A-C-G-T-G-AG---CAA-C-CT-G--C-C-TTT--CA-G----A-G-G-G-G-G---AT-AA-C--GT------------------T-T-G-…
>ICSZ4EG01A6VUI
G-A-T--G-A-A-C-G-C--T-G-G-C--G-G--C-G-T-G---C---T-T--AA-C--AC-A-T-G-C--A-A-G--T-C--GA-A-CG-----------G-G----G-A--T---------GTGAGC-G-----------GA---A-G-T-T--------------------TTC-G---------------------------G--A--T---G-G--AAG--CTTAT-----------A-T-----C-CT----------AG-T-G-G-C-GG-A--C--G-GG--T--G-A-G-T-A-AC-G-C-G-T-G-GG---TAA-C-CT-G--C-C-CTG--CA-C----A-G-G-G-G-G---AT-AA-C--AC------------------C-T-G-…
>ICSZ4EG01EHBP4
A-A-C--G-A-A-C-G-C--T-G-G-C--G-G--C-G-G-G---C---C-T--CA-T--AC-A-T-G-C--A-A-G--T-C--GA-G-CG-C---------G-AA---A-GT-----------------------------------C-C-G-C---------------------AA-G---------------------------G-------A-----------------------------T--GAG--TA--A-------AG-C-G-G-C-GC-A--C--G-GG--T--G-A-G-T-A-AC-A-C-G-T-G-GA---TAA-T-CT-A--C-C-CTT--TG-G----A-T-T-G-G-A---AT-AA-C---C------------------TGT-C-…
>ICSZ4EG01CQSEC
G-A-T--G-A-A-C-G-C--T-G-G-C--G-G--C-G-T-G---C---T-T--AA-C--AC-A-T-G-C--A-A-G--T-C--GA-G-CG-A---------A-G----C-A--CT-------------T-C-------GTTTTG-A-A---T-C--------------------TTC-G---------------------------G--A--GGAAGAAC-GGA------------------A-T----GA-CT--G-------AG-C-G-G-C-GG-A--C--G-GG--T--G-A-G-T-A-AC-G-C-G-T-G-GG---CAA-C-CT-G--C-C-TCA--TA-C----A-G-G-G-G-G---AT-AA-C--AG------------------T-T-A-…
>ICSZ4EG01CBAQ3
G-A-T--G-A-A-C-G-C--T-G-G-C--G-G--C-G-T-G---C---T-T--AA-C--AC-A-T-G-C--A-A-G--T-C--GA-ACGGGGTC-------A-TGA--TGTG-TGAAGGA--------G-C-----------CA-G-C-T-T-G--------------------CTGGG---------------------------G--ACGGAA-C-T--TTTC-----------------ATG----A--CT--T-------AG-T-G-G-C-GG-A--C--G-GG--T--G-A-G-T-A-AC-G-C-G-T-G-GG---TAA-C-CT-G--C-C-ATG--TA-C----A-G-G-G-G-G---AT-AA-C--AG------------------C-C-G-…
>ICSZ4EG01B0GAL
[truncated: 40,173 more rows]
